# Supplementary material for: The Coordination and Luminescence of the Eu(III) Complexes with the Polymers (PMMA, PVP)
Source: MDPI journal article supplement (doi:10.3390/polym10050508), 2018-05-07

# checkCIF/PLATON report

Structure factors have been supplied for datablock(s) HDS161202\_0m

THIS REPORT IS FOR GUIDANCE ONLY. IF USED AS PART OF A REVIEW PROCEDURE FOR PUBLICATION, IT SHOULD NOT REPLACE THE EXPERTISE OF AN EXPERIENCED CRYSTALLOGRAPHIC REFEREE.

No syntax errors found.      CIF dictionary      Interpreting this report

## Datablock: HDS161202\_0m

---

Bond precision:    C-C = 0.0093 A

Wavelength=0.71073

Cell:                    a=12.0336(16)      b=21.134(3)            c=19.0963(17)  
                          alpha=90            beta=110.757(6)      gamma=90  
Temperature:      296 K

|                | Calculated                          | Reported                           |
|----------------|-------------------------------------|------------------------------------|
| Volume         | 4541.3(10)                          | 4541.3(10)                         |
| Space group    | P 21/c                              | P 21/c                             |
| Hall group     | -P 2ybc                             | -P 2ybc                            |
| Moiety formula | C46 H32 Eu F9 N2 O6,<br>0.5(C6 H14) | C46 H32 Eu F9 N2 O6,<br>0.5(C6H14) |
| Sum formula    | C49 H39 Eu F9 N2 O6                 | C49 H39 Eu F9 N2 O6                |
| Mr             | 1074.79                             | 1074.78                            |
| Dx,g cm-3      | 1.572                               | 1.572                              |
| Z              | 4                                   | 4                                  |
| Mu (mm-1)      | 1.470                               | 1.470                              |
| F000           | 2156.0                              | 2156.0                             |
| F000'          | 2156.64                             |                                    |
| h,k,lmax       | 15,28,25                            | 15,28,24                           |
| Nref           | 11141                               | 11028                              |
| Tmin,Tmax      | 0.669,0.768                         | 0.960,1.000                        |
| Tmin'          | 0.656                               |                                    |

Correction method= # Reported T Limits: Tmin=0.960 Tmax=1.000  
AbsCorr = MULTI-SCAN

Data completeness= 0.990

Theta(max)= 28.164

R(reflections)= 0.0430( 7033)

wR2(reflections)= 0.1134( 11028)

S = 1.066

Npar= 605

---

The following ALERTS were generated. Each ALERT has the format

**test-name\_ALERT\_alert-type\_alert-level.**

Click on the hyperlinks for more details of the test.

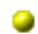

#### Alert level C

|                   |                                                  |       |    |     |    |               |
|-------------------|--------------------------------------------------|-------|----|-----|----|---------------|
| PLAT230_ALERT_2_C | Hirshfeld Test Diff for                          | F6    | -- | C24 | .. | 6.5 s.u.      |
| PLAT230_ALERT_2_C | Hirshfeld Test Diff for                          | C25   | -- | C30 | .. | 5.2 s.u.      |
| PLAT234_ALERT_4_C | Large Hirshfeld Difference                       | C3    | -- | C4  | .. | 0.16 Ang.     |
| PLAT234_ALERT_4_C | Large Hirshfeld Difference                       | C5    | -- | C10 | .. | 0.16 Ang.     |
| PLAT241_ALERT_2_C | High 'MainMol' Ueq as Compared to Neighbors of   |       |    |     |    | C10 Check     |
| PLAT241_ALERT_2_C | High 'MainMol' Ueq as Compared to Neighbors of   |       |    |     |    | C27 Check     |
| PLAT241_ALERT_2_C | High 'MainMol' Ueq as Compared to Neighbors of   |       |    |     |    | C34 Check     |
| PLAT244_ALERT_4_C | Low 'Solvent' Ueq as Compared to Neighbors of    |       |    |     |    | C2S Check     |
| PLAT342_ALERT_3_C | Low Bond Precision on C-C Bonds .....            |       |    |     |    | 0.00927 Ang.  |
| PLAT360_ALERT_2_C | Short C(sp3)-C(sp3) Bond                         | C2S   | -  | C3S | .. | 1.41 Ang.     |
| PLAT905_ALERT_3_C | Negative K value in the Analysis of Variance ... |       |    |     |    | -1.140 Report |
| PLAT910_ALERT_3_C | Missing # of FCF Reflection(s) Below Theta(Min)  |       |    |     |    | 5 Note        |
| PLAT911_ALERT_3_C | Missing # FCF Refl Between THmin & STh/L=        | 0.600 |    |     |    | 28 Report     |

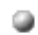

#### Alert level G

|                   |                                                  |       |  |  |  |              |
|-------------------|--------------------------------------------------|-------|--|--|--|--------------|
| PLAT002_ALERT_2_G | Number of Distance or Angle Restraints on AtSite |       |  |  |  | 5 Note       |
| PLAT003_ALERT_2_G | Number of Uiso or Uij Restrained non-H Atoms ... |       |  |  |  | 4 Report     |
| PLAT042_ALERT_1_G | Calc. and Reported MoietyFormula Strings Differ  |       |  |  |  | Please Check |
| PLAT128_ALERT_4_G | Alternate Setting for Input Space Group          | P21/c |  |  |  | P21/n Note   |
| PLAT172_ALERT_4_G | The CIF-Embedded .res File Contains DFIX Records |       |  |  |  | 3 Report     |
| PLAT177_ALERT_4_G | The CIF-Embedded .res File Contains DELU Records |       |  |  |  | 2 Report     |
| PLAT186_ALERT_4_G | The CIF-Embedded .res File Contains ISOR Records |       |  |  |  | 1 Report     |
| PLAT242_ALERT_2_G | Low 'MainMol' Ueq as Compared to Neighbors of    |       |  |  |  | C12 Check    |
| PLAT242_ALERT_2_G | Low 'MainMol' Ueq as Compared to Neighbors of    |       |  |  |  | C24 Check    |
| PLAT242_ALERT_2_G | Low 'MainMol' Ueq as Compared to Neighbors of    |       |  |  |  | C36 Check    |
| PLAT720_ALERT_4_G | Number of Unusual/Non-Standard Labels .....      |       |  |  |  | 7 Note       |
| PLAT860_ALERT_3_G | Number of Least-Squares Restraints .....         |       |  |  |  | 11 Note      |
| PLAT912_ALERT_4_G | Missing # of FCF Reflections Above STh/L=        | 0.600 |  |  |  | 66 Note      |
| PLAT933_ALERT_2_G | Number of OMIT Records in Embedded .res File ... |       |  |  |  | 3 Note       |
| PLAT978_ALERT_2_G | Number C-C Bonds with Positive Residual Density. |       |  |  |  | 1 Note       |

0 **ALERT level A** = Most likely a serious problem - resolve or explain

0 **ALERT level B** = A potentially serious problem, consider carefully

13 **ALERT level C** = Check. Ensure it is not caused by an omission or oversight

15 **ALERT level G** = General information/check it is not something unexpected

1 **ALERT type 1** CIF construction/syntax error, inconsistent or missing data

13 **ALERT type 2** Indicator that the structure model may be wrong or deficient

5 **ALERT type 3** Indicator that the structure quality may be low

9 **ALERT type 4** Improvement, methodology, query or suggestion

0 **ALERT type 5** Informative message, check

It is advisable to attempt to resolve as many as possible of the alerts in all categories. Often the minor alerts point to easily fixed oversights, errors and omissions in your CIF or refinement strategy, so attention to these fine details can be worthwhile. In order to resolve some of the more serious problems it may be necessary to carry out additional measurements or structure refinements. However, the purpose of your study may justify the reported deviations and the more serious of these should normally be commented upon in the discussion or experimental section of a paper or in the "special\_details" fields of the CIF. checkCIF was carefully designed to identify outliers and unusual parameters, but every test has its limitations and alerts that are not important in a particular case may appear. Conversely, the absence of alerts does not guarantee there are no aspects of the results needing attention. It is up to the individual to critically assess their own results and, if necessary, seek expert advice.

### **Publication of your CIF in IUCr journals**

A basic structural check has been run on your CIF. These basic checks will be run on all CIFs submitted for publication in IUCr journals (*Acta Crystallographica*, *Journal of Applied Crystallography*, *Journal of Synchrotron Radiation*); however, if you intend to submit to *Acta Crystallographica Section C* or *E* or *IUCrData*, you should make sure that full publication checks are run on the final version of your CIF prior to submission.

### **Publication of your CIF in other journals**

Please refer to the *Notes for Authors* of the relevant journal for any special instructions relating to CIF submission.

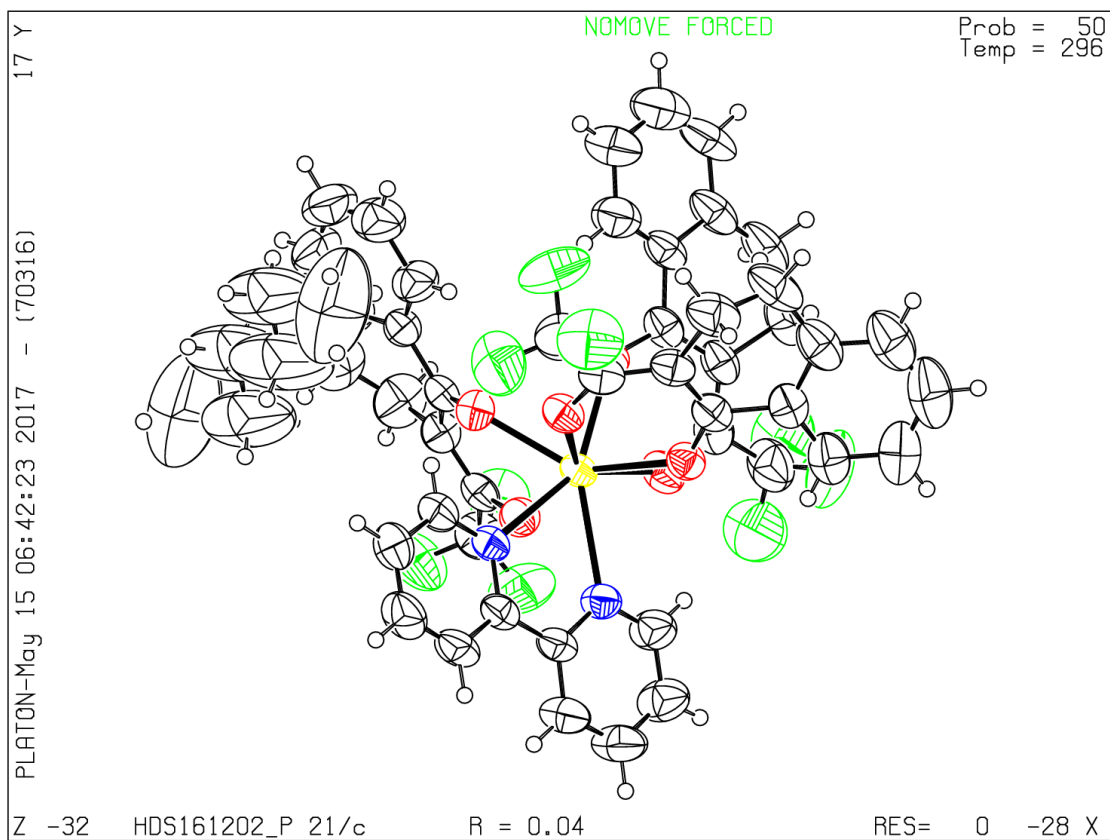

Supplement: s1 [file s1]
