# Supplementary material for: The Coordination and Luminescence of the Eu(III) Complexes with the Polymers (PMMA, PVP)
Source: Polymers (Basel). 2018 May 7;10(5):508. doi: 10.3390/polym10050508 (PMC6415368; doi:10.3390/polym10050508)
Supplement: Supplementary file 1 [file polymers-10-00508-s001.zip]

Archive with 4 entries (4 files):
- checkcif for CCDC 1524434-Complex 2.pdf
- CCDC 1484014-Complex 1.cif
- CCDC 1524434-Complex 2.cif
- checkcif for CCDC 1484014-Complex 1.pdf
