# Supplementary material for: The Coordination and Luminescence of the Eu(III) Complexes with the Polymers (PMMA, PVP)
Source: Polymers (Basel). 2018 May 7;10(5):508. doi: 10.3390/polym10050508 (PMC6415368; doi:10.3390/polym10050508)
Supplement: Supplementary file 1 [file polymers-10-00508-s001.zip › CCDC 1484014-Complex 1.cif]

 
data_HD61S5_0m
 
_audit_creation_method            'SHELXL-2014/7'
_shelx_SHELXL_version_number      '2014/7'
_chemical_name_systematic         
;
Eu[2-(2,2,2-trifluoroethyl)-1- tetralone]3 (1,10-Phenanthrolinemonohydrate)
;
_chemical_name_common             ?
_chemical_melting_point           ?
_chemical_formula_moiety           'C48 H30 Eu F9 N2 O6' 
_chemical_formula_sum
 'C48 H30 Eu F9 N2 O6' 
_chemical_formula_weight          1053.70

loop_
 _atom_type_symbol
 _atom_type_description
 _atom_type_scat_dispersion_real
 _atom_type_scat_dispersion_imag
 _atom_type_scat_source
 'C'  'C'   0.0033   0.0016
 'International Tables Vol C Tables 4.2.6.8 and 6.1.1.4'
 'H'  'H'   0.0000   0.0000
 'International Tables Vol C Tables 4.2.6.8 and 6.1.1.4'
 'Eu'  'Eu'  -0.1578   3.6682
 'International Tables Vol C Tables 4.2.6.8 and 6.1.1.4'
 'F'  'F'   0.0171   0.0103
 'International Tables Vol C Tables 4.2.6.8 and 6.1.1.4'
 'N'  'N'   0.0061   0.0033
 'International Tables Vol C Tables 4.2.6.8 and 6.1.1.4'
 'O'  'O'   0.0106   0.0060
 'International Tables Vol C Tables 4.2.6.8 and 6.1.1.4'
 
_space_group_crystal_system       monoclinic
_space_group_IT_number            14
_space_group_name_H-M_alt         'P 21/n'
_space_group_name_Hall            '-P 2yn'
 
_shelx_space_group_comment
;
The symmetry employed for this shelxl refinement is uniquely defined
by the following loop, which should always be used as a source of
symmetry information in preference to the above space-group names.
They are only intended as comments.
;
 
loop_
 _space_group_symop_operation_xyz
 'x, y, z'
 '-x+1/2, y+1/2, -z+1/2'
 '-x, -y, -z'
 'x-1/2, -y-1/2, z-1/2'
 
_cell_length_a                    21.005(2)
_cell_length_b                    9.6340(9)
_cell_length_c                    22.989(2)
_cell_angle_alpha                 90
_cell_angle_beta                  105.1550(10)
_cell_angle_gamma                 90
_cell_volume                      4490.3(7)
_cell_formula_units_Z             4
_cell_measurement_temperature     296(2)
_cell_measurement_reflns_used     4572
_cell_measurement_theta_min       2.3405
_cell_measurement_theta_max       19.4004
 
_exptl_crystal_description        block
_exptl_crystal_colour             yellow
_exptl_crystal_density_meas       ?
_exptl_crystal_density_method     'not measured'
_exptl_crystal_density_diffrn     1.559          
_exptl_crystal_F_000              2096
_exptl_transmission_factor_min    ?
_exptl_transmission_factor_max    ?
_exptl_crystal_size_max           0.320
_exptl_crystal_size_mid           0.280
_exptl_crystal_size_min           0.260
_exptl_absorpt_coefficient_mu     1.485
_shelx_estimated_absorpt_T_min    0.648
_shelx_estimated_absorpt_T_max    0.699
_exptl_absorpt_correction_type    'multi-scan'
_exptl_absorpt_correction_T_min   0.9942
_exptl_absorpt_correction_T_max   1.0000
_exptl_absorpt_process_details    
;
CrysAlisPro, Agilent Technologies,
Version 1.171.35.21 (release 20-01-2012 CrysAlis171 .NET)
(compiled Jan 23 2012,18:06:46)
Empirical absorption correction using spherical harmonics,
 implemented in SCALE3 ABSPACK scaling algorithm.
; 
_exptl_absorpt_special_details    ?
_diffrn_ambient_temperature       296(2)
_diffrn_radiation_wavelength      0.71073
_diffrn_radiation_type            MoK\a
_diffrn_source                    'fine-focus sealed tube'
_diffrn_measurement_device_type   'Bruker SMART APEXII CCD area-detector'
_diffrn_measurement_method        '\f and \w'
_diffrn_detector_area_resol_mean  ?
_diffrn_reflns_number             40468
_diffrn_reflns_av_unetI/netI      0.0802
_diffrn_reflns_av_R_equivalents   0.0726
_diffrn_reflns_limit_h_min        -27
_diffrn_reflns_limit_h_max        28
_diffrn_reflns_limit_k_min        -12
_diffrn_reflns_limit_k_max        12
_diffrn_reflns_limit_l_min        -30
_diffrn_reflns_limit_l_max        30
_diffrn_reflns_theta_min          2.305
_diffrn_reflns_theta_max          28.384
_diffrn_reflns_theta_full         25.242
_diffrn_measured_fraction_theta_max   0.995
_diffrn_measured_fraction_theta_full  1.000
_diffrn_reflns_Laue_measured_fraction_max    0.995
_diffrn_reflns_Laue_measured_fraction_full   1.000
_diffrn_reflns_point_group_measured_fraction_max   0.995
_diffrn_reflns_point_group_measured_fraction_full  1.000
_reflns_number_total              11190
_reflns_number_gt                 5646
_reflns_threshold_expression      'I > 2\s(I)'
_reflns_Friedel_coverage          0.000
_reflns_Friedel_fraction_max      .
_reflns_Friedel_fraction_full     .
 
_reflns_special_details
;
 Reflections were merged by SHELXL according to the crystal
 class for the calculation of statistics and refinement.
 
 _reflns_Friedel_fraction is defined as the number of unique
 Friedel pairs measured divided by the number that would be
 possible theoretically, ignoring centric projections and
 systematic absences.
;
 
_computing_data_collection        'APEX2'
_computing_cell_refinement        'SAINT'
_computing_data_reduction         'SAINT'
_computing_structure_solution     'SHELXS-97' 
_computing_structure_refinement 'SHELXL-2014/7 (Sheldrick, 2014)'
_computing_molecular_graphics     'SHELXTL'
_computing_publication_material   'publCIF'
_refine_special_details           ??
_refine_ls_structure_factor_coef  Fsqd
_refine_ls_matrix_type            full
_refine_ls_weighting_scheme       calc
_refine_ls_weighting_details
'w=1/[\s^2^(Fo^2^)+(0.0667P)^2^] where P=(Fo^2^+2Fc^2^)/3'
_atom_sites_solution_primary      ?
_atom_sites_solution_secondary    ?
_atom_sites_solution_hydrogens    geom
_refine_ls_hydrogen_treatment     constr
_refine_ls_extinction_method      none
_refine_ls_extinction_coef        .
_refine_ls_number_reflns          11190
_refine_ls_number_parameters      589
_refine_ls_number_restraints      55
_refine_ls_R_factor_all           0.1224
_refine_ls_R_factor_gt            0.0507
_refine_ls_wR_factor_ref          0.1447
_refine_ls_wR_factor_gt           0.1133
_refine_ls_goodness_of_fit_ref    0.959
_refine_ls_restrained_S_all       1.012
_refine_ls_shift/su_max           0.003
_refine_ls_shift/su_mean          0.000
 
loop_
 _atom_site_label
 _atom_site_type_symbol
 _atom_site_fract_x
 _atom_site_fract_y
 _atom_site_fract_z
 _atom_site_U_iso_or_equiv
 _atom_site_adp_type
 _atom_site_occupancy
 _atom_site_site_symmetry_order  
 _atom_site_calc_flag
 _atom_site_refinement_flags_posn
 _atom_site_refinement_flags_adp
 _atom_site_refinement_flags_occupancy
 _atom_site_disorder_assembly
 _atom_site_disorder_group
C1 C 0.0802(3) 0.1290(7) 1.0485(3) 0.0741(16) Uani 1 1 d . . . . .
H1 H 0.0718 0.2210 1.0367 0.089 Uiso 1 1 calc R U . . .
C2 C 0.0339(3) 0.0587(8) 1.0711(3) 0.088(2) Uani 1 1 d . . . . .
H2 H -0.0041 0.1034 1.0748 0.106 Uiso 1 1 calc R U . . .
C3 C 0.0453(4) -0.0763(8) 1.0879(3) 0.090(2) Uani 1 1 d . . . . .
H3 H 0.0145 -0.1252 1.1024 0.108 Uiso 1 1 calc R U . . .
C4 C 0.1027(4) -0.1411(8) 1.0836(3) 0.0832(19) Uani 1 1 d . . . . .
C5 C 0.1476(3) -0.0627(6) 1.0608(2) 0.0656(15) Uani 1 1 d . . . . .
C6 C 0.2087(3) -0.1231(6) 1.0587(2) 0.0699(16) Uani 1 1 d . . . . .
C7 C 0.2225(5) -0.2645(7) 1.0767(3) 0.087(2) Uani 1 1 d . . . . .
C8 C 0.1751(5) -0.3384(9) 1.0969(4) 0.117(3) Uani 1 1 d . . . . .
H8 H 0.1839 -0.4306 1.1083 0.140 Uiso 1 1 calc R U . . .
C9 C 0.1180(5) -0.2837(8) 1.1009(4) 0.106(3) Uani 1 1 d . . . . .
H9 H 0.0881 -0.3374 1.1147 0.128 Uiso 1 1 calc R U . . .
C10 C 0.2838(5) -0.3166(8) 1.0742(4) 0.100(2) Uani 1 1 d . . . . .
H10 H 0.2947 -0.4082 1.0853 0.120 Uiso 1 1 calc R U . . .
C11 C 0.3260(5) -0.2384(8) 1.0566(3) 0.098(2) Uani 1 1 d . . . . .
H11 H 0.3668 -0.2736 1.0553 0.117 Uiso 1 1 calc R U . . .
C12 C 0.3090(4) -0.1014(7) 1.0398(3) 0.0833(19) Uani 1 1 d . . . . .
H12 H 0.3394 -0.0472 1.0270 0.100 Uiso 1 1 calc R U . . .
C13 C 0.1545(5) 0.3471(9) 1.1951(3) 0.106(2) Uani 1 1 d . . . . .
H13 H 0.1325 0.2975 1.1611 0.128 Uiso 1 1 calc R U . . .
C14 C 0.1203(5) 0.3892(10) 1.2359(3) 0.125(3) Uani 1 1 d . . . . .
H14 H 0.0756 0.3706 1.2296 0.150 Uiso 1 1 calc R U . . .
C15 C 0.1555(6) 0.4601(9) 1.2865(4) 0.122(3) Uani 1 1 d . U . . .
H15 H 0.1340 0.4887 1.3151 0.147 Uiso 1 1 calc R U . . .
C16 C 0.2194(5) 0.4885(9) 1.2952(3) 0.116(3) Uani 1 1 d . U . . .
H16 H 0.2413 0.5354 1.3301 0.139 Uiso 1 1 calc R U . . .
C17 C 0.2549(5) 0.4504(7) 1.2539(3) 0.098(2) Uani 1 1 d . U . . .
C18 C 0.2196(4) 0.3768(7) 1.2038(3) 0.0812(19) Uani 1 1 d . . . . .
C19 C 0.2541(4) 0.3330(6) 1.1578(3) 0.0738(18) Uani 1 1 d . . . . .
C20 C 0.3242(4) 0.3411(8) 1.1725(3) 0.092(2) Uani 1 1 d . . . . .
C21 C 0.3606(5) 0.3905(13) 1.2355(4) 0.158(4) Uani 1 1 d . U . . .
H21 H 0.4026 0.3604 1.2558 0.189 Uiso 1 1 calc R U . . .
C22 C 0.3250(5) 0.4839(11) 1.2592(4) 0.154(4) Uani 1 1 d . . . . .
H22 H 0.3440 0.5650 1.2778 0.185 Uiso 1 1 calc R U . . .
C23 C 0.3557(3) 0.2877(8) 1.1322(4) 0.087(2) Uani 1 1 d . . . . .
C24 C 0.4312(6) 0.2922(16) 1.1478(6) 0.151(4) Uani 1 1 d . . . . .
C25 C 0.3516(4) 0.5560(8) 0.9289(4) 0.101(2) Uani 1 1 d . . . . .
H25 H 0.3644 0.4709 0.9475 0.121 Uiso 1 1 calc R U . . .
C26 C 0.3971(4) 0.6355(11) 0.9102(5) 0.133(3) Uani 1 1 d . . . . .
H26 H 0.4404 0.6058 0.9163 0.160 Uiso 1 1 calc R U . . .
C27 C 0.3766(6) 0.7599(12) 0.8821(5) 0.138(4) Uani 1 1 d . . . . .
H27 H 0.4063 0.8131 0.8679 0.165 Uiso 1 1 calc R U . . .
C28 C 0.3143(5) 0.8064(8) 0.8747(4) 0.110(3) Uani 1 1 d . . . . .
H28 H 0.3024 0.8932 0.8576 0.132 Uiso 1 1 calc R U . . .
C29 C 0.2679(4) 0.7261(7) 0.8924(3) 0.0785(19) Uani 1 1 d . . . . .
C30 C 0.2872(3) 0.6010(7) 0.9206(3) 0.0735(17) Uani 1 1 d . . . . .
C31 C 0.2405(3) 0.5141(6) 0.9432(3) 0.0687(16) Uani 1 1 d . . . . .
C32 C 0.1716(3) 0.5431(6) 0.9231(2) 0.0677(15) Uani 1 1 d . . . . .
C33 C 0.1503(4) 0.6540(8) 0.8741(3) 0.094(2) Uani 1 1 d . . . . .
H33A H 0.1476 0.6133 0.8349 0.113 Uiso 1 1 calc R U . . .
H33B H 0.1069 0.6886 0.8740 0.113 Uiso 1 1 calc R U . . .
C34 C 0.1992(5) 0.7731(7) 0.8853(3) 0.093(2) Uani 1 1 d . . . . .
H34A H 0.1872 0.8377 0.8518 0.112 Uiso 1 1 calc R U . . .
H34B H 0.1966 0.8221 0.9214 0.112 Uiso 1 1 calc R U . . .
C35 C 0.1285(3) 0.4704(6) 0.9481(3) 0.0673(15) Uani 1 1 d . . . . .
C36 C 0.0544(4) 0.5071(11) 0.9276(4) 0.110(3) Uani 1 1 d . . . . .
C37 C 0.4200(4) 0.1475(10) 0.9327(4) 0.122(3) Uani 1 1 d . . . . .
H37 H 0.4163 0.1262 0.9711 0.147 Uiso 1 1 calc R U . . .
C38 C 0.4820(4) 0.1483(14) 0.9225(5) 0.161(4) Uani 1 1 d . . . . .
H38 H 0.5199 0.1287 0.9528 0.193 Uiso 1 1 calc R U . . .
C39 C 0.4842(7) 0.1799(16) 0.8648(7) 0.200(6) Uani 1 1 d . U . . .
H39 H 0.5241 0.1700 0.8547 0.240 Uiso 1 1 calc R U . . .
C40 C 0.4308(7) 0.2249(15) 0.8217(6) 0.193(5) Uani 1 1 d . U . . .
H40 H 0.4350 0.2642 0.7859 0.232 Uiso 1 1 calc R U . . .
C41 C 0.3701(6) 0.2098(14) 0.8336(5) 0.181(3) Uani 1 1 d . U . . .
C42 C 0.3643(4) 0.1765(7) 0.8888(3) 0.0838(19) Uani 1 1 d . . . . .
C43 C 0.2996(3) 0.1714(6) 0.9019(3) 0.0688(16) Uani 1 1 d . . . . .
C44 C 0.2419(4) 0.1907(7) 0.8545(3) 0.0794(19) Uani 1 1 d . . . . .
C45 C 0.2480(4) 0.2232(11) 0.7918(3) 0.141(4) Uani 1 1 d D . . . .
H45A H 0.2311 0.1451 0.7657 0.170 Uiso 1 1 calc R U . . .
H45B H 0.2205 0.3029 0.7764 0.170 Uiso 1 1 calc R U . . .
C46 C 0.3113(5) 0.2508(14) 0.7890(5) 0.181(3) Uani 1 1 d D . . . .
H46A H 0.3140 0.3507 0.7852 0.217 Uiso 1 1 calc R U . . .
H46B H 0.3151 0.2120 0.7511 0.217 Uiso 1 1 calc R U . . .
C47 C 0.1807(3) 0.1709(7) 0.8650(3) 0.0776(18) Uani 1 1 d . . . . .
C48 C 0.1179(5) 0.1729(15) 0.8111(4) 0.135(4) Uani 1 1 d . . . . .
Eu1 Eu 0.22696(2) 0.21361(3) 1.01340(2) 0.05473(11) Uani 1 1 d . . . . .
F1 F 0.4596(3) 0.2299(9) 1.1981(4) 0.215(4) Uani 1 1 d . . . . .
F2 F 0.4533(3) 0.2277(10) 1.1050(4) 0.216(4) Uani 1 1 d . . . . .
F3 F 0.4547(3) 0.4177(10) 1.1507(4) 0.243(4) Uani 1 1 d . . . . .
F4 F 0.0304(2) 0.4935(6) 0.8689(2) 0.153(2) Uani 1 1 d . . . . .
F5 F 0.0202(2) 0.4239(6) 0.9541(2) 0.1464(19) Uani 1 1 d . U . . .
F6 F 0.0419(3) 0.6355(6) 0.9416(3) 0.152(2) Uani 1 1 d . . . . .
F7 F 0.0663(3) 0.1401(10) 0.8274(2) 0.193(3) Uani 1 1 d . U . . .
F8 F 0.1085(3) 0.2961(9) 0.7850(3) 0.193(3) Uani 1 1 d . . . . .
F9 F 0.1232(3) 0.0822(7) 0.7686(2) 0.165(2) Uani 1 1 d . . . . .
N1 N 0.1355(2) 0.0710(5) 1.04272(18) 0.0589(11) Uani 1 1 d . . . . .
N2 N 0.2524(3) -0.0444(5) 1.04085(19) 0.0658(12) Uani 1 1 d . . . . .
O1 O 0.21850(19) 0.2889(4) 1.10823(16) 0.0665(10) Uani 1 1 d . . . . .
O2 O 0.3317(2) 0.2300(5) 1.0820(2) 0.0821(12) Uani 1 1 d . . . . .
O3 O 0.26428(18) 0.4186(4) 0.98024(18) 0.0745(11) Uani 1 1 d . . . . .
O4 O 0.14120(18) 0.3767(4) 0.98751(16) 0.0687(10) Uani 1 1 d . . . . .
O5 O 0.29900(19) 0.1453(5) 0.95562(16) 0.0743(11) Uani 1 1 d . . . . .
O6 O 0.1676(2) 0.1532(5) 0.91468(17) 0.0797(12) Uani 1 1 d . . . . .
 
loop_
 _atom_site_aniso_label
 _atom_site_aniso_U_11
 _atom_site_aniso_U_22
 _atom_site_aniso_U_33
 _atom_site_aniso_U_23
 _atom_site_aniso_U_13
 _atom_site_aniso_U_12
C1 0.068(4) 0.076(4) 0.079(4) 0.004(3) 0.020(3) -0.003(4)
C2 0.076(5) 0.106(6) 0.088(5) -0.002(4) 0.032(4) -0.011(4)
C3 0.087(5) 0.102(6) 0.085(5) 0.010(4) 0.029(4) -0.042(5)
C4 0.096(5) 0.080(5) 0.075(4) 0.002(4) 0.024(4) -0.029(4)
C5 0.077(4) 0.062(4) 0.055(3) -0.004(3) 0.012(3) -0.018(3)
C6 0.097(5) 0.053(4) 0.057(3) -0.002(3) 0.014(3) 0.000(3)
C7 0.128(7) 0.056(4) 0.076(4) 0.006(3) 0.021(4) -0.009(4)
C8 0.159(9) 0.059(5) 0.128(7) 0.013(5) 0.029(7) -0.009(6)
C9 0.132(8) 0.076(5) 0.115(6) 0.029(5) 0.038(6) -0.031(5)
C10 0.128(7) 0.072(5) 0.097(6) -0.002(4) 0.025(5) 0.027(5)
C11 0.126(7) 0.086(6) 0.080(5) 0.008(4) 0.025(5) 0.040(5)
C12 0.102(5) 0.079(5) 0.068(4) 0.008(3) 0.022(4) 0.016(4)
C13 0.130(7) 0.122(6) 0.071(5) -0.020(4) 0.034(5) 0.006(6)
C14 0.163(8) 0.139(8) 0.081(5) -0.013(5) 0.047(6) 0.024(6)
C15 0.182(7) 0.116(6) 0.078(5) -0.006(4) 0.050(5) 0.037(6)
C16 0.166(7) 0.098(5) 0.070(4) -0.016(4) 0.008(5) 0.024(5)
C17 0.142(6) 0.089(5) 0.054(3) -0.008(3) 0.008(4) 0.017(5)
C18 0.120(6) 0.066(4) 0.050(3) 0.002(3) 0.010(4) 0.006(4)
C19 0.102(5) 0.059(4) 0.053(3) -0.005(3) 0.006(3) -0.004(3)
C20 0.086(5) 0.103(5) 0.074(5) -0.020(4) -0.001(4) -0.009(4)
C21 0.142(7) 0.179(8) 0.126(6) -0.053(6) -0.012(5) -0.012(6)
C22 0.141(9) 0.148(9) 0.134(8) -0.073(7) -0.035(6) -0.018(7)
C23 0.065(4) 0.091(5) 0.088(5) 0.017(4) -0.009(4) -0.018(4)
C24 0.094(8) 0.212(14) 0.131(10) -0.013(9) 0.000(7) -0.021(9)
C25 0.107(6) 0.079(5) 0.130(6) 0.001(4) 0.052(5) -0.019(5)
C26 0.105(7) 0.116(7) 0.203(10) -0.001(7) 0.084(7) -0.024(6)
C27 0.148(10) 0.132(9) 0.158(10) 0.001(7) 0.085(8) -0.052(8)
C28 0.160(9) 0.077(6) 0.104(6) 0.001(4) 0.053(6) -0.036(6)
C29 0.112(6) 0.063(4) 0.068(4) 0.000(3) 0.039(4) -0.009(4)
C30 0.080(5) 0.066(4) 0.082(4) -0.005(3) 0.034(4) -0.014(3)
C31 0.077(4) 0.064(4) 0.069(4) 0.008(3) 0.026(3) -0.003(3)
C32 0.074(4) 0.069(4) 0.062(3) 0.009(3) 0.022(3) 0.002(3)
C33 0.116(6) 0.091(5) 0.077(4) 0.029(4) 0.029(4) 0.010(5)
C34 0.150(8) 0.061(4) 0.071(4) 0.015(3) 0.034(5) 0.004(5)
C35 0.068(4) 0.064(4) 0.070(4) 0.007(3) 0.018(3) 0.008(3)
C36 0.073(5) 0.138(8) 0.118(7) 0.060(6) 0.023(5) 0.012(5)
C37 0.083(6) 0.166(8) 0.128(7) 0.033(6) 0.045(5) 0.011(6)
C38 0.073(6) 0.242(13) 0.164(10) 0.043(9) 0.025(6) 0.009(7)
C39 0.178(9) 0.254(10) 0.198(9) 0.010(8) 0.099(8) 0.018(7)
C40 0.175(9) 0.275(10) 0.151(8) 0.024(7) 0.080(7) -0.019(7)
C41 0.148(6) 0.303(8) 0.105(5) 0.041(5) 0.056(4) -0.018(6)
C42 0.088(5) 0.094(5) 0.080(5) 0.001(4) 0.042(4) 0.004(4)
C43 0.085(5) 0.064(4) 0.065(4) 0.007(3) 0.033(3) 0.010(3)
C44 0.089(5) 0.103(5) 0.047(3) 0.017(3) 0.021(3) 0.016(4)
C45 0.130(8) 0.233(11) 0.068(5) 0.046(6) 0.038(5) 0.024(7)
C46 0.148(6) 0.303(8) 0.105(5) 0.041(5) 0.056(4) -0.018(6)
C47 0.084(5) 0.095(5) 0.053(4) -0.003(3) 0.017(3) 0.006(4)
C48 0.104(7) 0.247(13) 0.053(5) 0.007(6) 0.017(5) -0.003(8)
Eu1 0.06000(19) 0.05753(18) 0.04609(16) 0.00483(13) 0.01288(12) 0.00078(15)
F1 0.088(4) 0.322(11) 0.188(7) 0.013(6) -0.045(4) -0.008(5)
F2 0.072(4) 0.353(11) 0.215(8) -0.075(7) 0.022(4) -0.030(5)
F3 0.150(6) 0.273(9) 0.306(10) -0.059(8) 0.059(6) -0.138(7)
F4 0.087(3) 0.220(6) 0.126(4) 0.045(4) -0.016(3) 0.014(3)
F5 0.081(3) 0.183(5) 0.177(4) 0.075(4) 0.036(3) 0.016(3)
F6 0.138(4) 0.136(4) 0.204(6) 0.064(4) 0.083(4) 0.077(4)
F7 0.106(4) 0.371(8) 0.098(3) -0.019(4) 0.017(3) -0.029(5)
F8 0.165(6) 0.289(10) 0.101(4) 0.029(5) -0.011(4) 0.082(6)
F9 0.151(5) 0.256(7) 0.078(3) -0.054(4) 0.013(3) -0.017(4)
N1 0.066(3) 0.058(3) 0.052(3) -0.001(2) 0.015(2) -0.011(2)
N2 0.081(4) 0.068(3) 0.049(3) 0.003(2) 0.017(2) 0.009(3)
O1 0.073(3) 0.076(3) 0.046(2) -0.0093(19) 0.0079(18) 0.000(2)
O2 0.059(3) 0.107(3) 0.073(3) 0.002(2) 0.005(2) 0.000(2)
O3 0.062(3) 0.065(3) 0.096(3) 0.020(2) 0.021(2) -0.002(2)
O4 0.071(3) 0.069(3) 0.071(2) 0.019(2) 0.026(2) 0.006(2)
O5 0.082(3) 0.089(3) 0.056(2) 0.017(2) 0.025(2) 0.022(2)
O6 0.082(3) 0.105(3) 0.052(2) -0.006(2) 0.019(2) -0.008(3)
 
_geom_special_details
;
 All esds (except the esd in the dihedral angle between two l.s. planes)
 are estimated using the full covariance matrix.  The cell esds are taken
 into account individually in the estimation of esds in distances, angles
 and torsion angles; correlations between esds in cell parameters are only
 used when they are defined by crystal symmetry.  An approximate (isotropic)
 treatment of cell esds is used for estimating esds involving l.s. planes.
;
 
loop_
 _geom_bond_atom_site_label_1
 _geom_bond_atom_site_label_2
 _geom_bond_distance
 _geom_bond_site_symmetry_2
 _geom_bond_publ_flag
C1 N1 1.327(7) . ?
C1 C2 1.392(8) . ?
C1 H1 0.9300 . ?
C2 C3 1.360(9) . ?
C2 H2 0.9300 . ?
C3 C4 1.383(9) . ?
C3 H3 0.9300 . ?
C4 C5 1.411(8) . ?
C4 C9 1.443(10) . ?
C5 N1 1.357(7) . ?
C5 C6 1.421(8) . ?
C6 N2 1.337(7) . ?
C6 C7 1.431(9) . ?
C7 C10 1.396(11) . ?
C7 C8 1.400(11) . ?
C8 C9 1.336(11) . ?
C8 H8 0.9300 . ?
C9 H9 0.9300 . ?
C10 C11 1.306(11) . ?
C10 H10 0.9300 . ?
C11 C12 1.396(9) . ?
C11 H11 0.9300 . ?
C12 N2 1.315(7) . ?
C12 H12 0.9300 . ?
C13 C18 1.361(10) . ?
C13 C14 1.382(10) . ?
C13 H13 0.9300 . ?
C14 C15 1.385(11) . ?
C14 H14 0.9300 . ?
C15 C16 1.333(11) . ?
C15 H15 0.9300 . ?
C16 C17 1.401(10) . ?
C16 H16 0.9300 . ?
C17 C18 1.391(9) . ?
C17 C22 1.480(12) . ?
C18 C19 1.489(9) . ?
C19 O1 1.262(6) . ?
C19 C20 1.426(9) . ?
C20 C23 1.370(10) . ?
C20 C21 1.527(10) . ?
C21 C22 1.370(13) . ?
C21 H21 0.9300 . ?
C22 H22 0.9300 . ?
C23 O2 1.262(8) . ?
C23 C24 1.533(13) . ?
C24 F1 1.300(13) . ?
C24 F3 1.301(14) . ?
C24 F2 1.346(13) . ?
C25 C26 1.379(10) . ?
C25 C30 1.385(9) . ?
C25 H25 0.9300 . ?
C26 C27 1.375(13) . ?
C26 H26 0.9300 . ?
C27 C28 1.352(13) . ?
C27 H27 0.9300 . ?
C28 C29 1.386(10) . ?
C28 H28 0.9300 . ?
C29 C30 1.379(9) . ?
C29 C34 1.481(10) . ?
C30 C31 1.483(8) . ?
C31 O3 1.265(6) . ?
C31 C32 1.426(8) . ?
C32 C35 1.383(8) . ?
C32 C33 1.532(8) . ?
C33 C34 1.516(10) . ?
C33 H33A 0.9700 . ?
C33 H33B 0.9700 . ?
C34 H34A 0.9700 . ?
C34 H34B 0.9700 . ?
C35 O4 1.257(6) . ?
C35 C36 1.545(9) . ?
C36 F4 1.318(9) . ?
C36 F6 1.321(11) . ?
C36 F5 1.326(8) . ?
C37 C42 1.360(10) . ?
C37 C38 1.382(11) . ?
C37 H37 0.9300 . ?
C38 C39 1.374(15) . ?
C38 H38 0.9300 . ?
C39 C40 1.358(16) . ?
C39 H39 0.9300 . ?
C40 C41 1.379(15) . ?
C40 H40 0.9300 . ?
C41 C42 1.345(11) . ?
C41 C46 1.440(14) . ?
C42 C43 1.467(9) . ?
C43 O5 1.263(6) . ?
C43 C44 1.416(9) . ?
C44 C47 1.382(9) . ?
C44 C45 1.512(9) . ?
C45 C46 1.375(8) . ?
C45 H45A 0.9700 . ?
C45 H45B 0.9700 . ?
C46 H46A 0.9700 . ?
C46 H46B 0.9700 . ?
C47 O6 1.254(7) . ?
C47 C48 1.555(11) . ?
C48 F7 1.275(10) . ?
C48 F8 1.322(13) . ?
C48 F9 1.338(11) . ?
Eu1 O3 2.325(4) . ?
Eu1 O1 2.348(4) . ?
Eu1 O4 2.347(4) . ?
Eu1 O2 2.353(4) . ?
Eu1 O5 2.353(4) . ?
Eu1 O6 2.359(4) . ?
Eu1 N2 2.585(5) . ?
Eu1 N1 2.590(4) . ?
 
loop_
 _geom_angle_atom_site_label_1
 _geom_angle_atom_site_label_2
 _geom_angle_atom_site_label_3
 _geom_angle
 _geom_angle_site_symmetry_1
 _geom_angle_site_symmetry_3
 _geom_angle_publ_flag
N1 C1 C2 123.2(6) . . ?
N1 C1 H1 118.4 . . ?
C2 C1 H1 118.4 . . ?
C3 C2 C1 118.9(7) . . ?
C3 C2 H2 120.6 . . ?
C1 C2 H2 120.6 . . ?
C2 C3 C4 120.2(6) . . ?
C2 C3 H3 119.9 . . ?
C4 C3 H3 119.9 . . ?
C3 C4 C5 117.7(7) . . ?
C3 C4 C9 123.0(7) . . ?
C5 C4 C9 119.3(7) . . ?
N1 C5 C4 122.1(6) . . ?
N1 C5 C6 118.4(5) . . ?
C4 C5 C6 119.4(6) . . ?
N2 C6 C5 118.6(5) . . ?
N2 C6 C7 121.6(7) . . ?
C5 C6 C7 119.8(7) . . ?
C10 C7 C8 125.0(8) . . ?
C10 C7 C6 116.8(7) . . ?
C8 C7 C6 118.1(8) . . ?
C9 C8 C7 123.5(8) . . ?
C9 C8 H8 118.3 . . ?
C7 C8 H8 118.3 . . ?
C8 C9 C4 119.8(7) . . ?
C8 C9 H9 120.1 . . ?
C4 C9 H9 120.1 . . ?
C11 C10 C7 120.8(8) . . ?
C11 C10 H10 119.6 . . ?
C7 C10 H10 119.6 . . ?
C10 C11 C12 119.1(8) . . ?
C10 C11 H11 120.5 . . ?
C12 C11 H11 120.5 . . ?
N2 C12 C11 123.9(7) . . ?
N2 C12 H12 118.1 . . ?
C11 C12 H12 118.1 . . ?
C18 C13 C14 121.3(8) . . ?
C18 C13 H13 119.3 . . ?
C14 C13 H13 119.3 . . ?
C13 C14 C15 117.2(9) . . ?
C13 C14 H14 121.4 . . ?
C15 C14 H14 121.4 . . ?
C16 C15 C14 121.5(8) . . ?
C16 C15 H15 119.3 . . ?
C14 C15 H15 119.3 . . ?
C15 C16 C17 122.6(8) . . ?
C15 C16 H16 118.7 . . ?
C17 C16 H16 118.7 . . ?
C18 C17 C16 115.6(9) . . ?
C18 C17 C22 118.8(7) . . ?
C16 C17 C22 125.6(8) . . ?
C13 C18 C17 121.8(7) . . ?
C13 C18 C19 119.5(6) . . ?
C17 C18 C19 118.7(7) . . ?
O1 C19 C20 124.3(6) . . ?
O1 C19 C18 117.0(6) . . ?
C20 C19 C18 118.7(6) . . ?
C23 C20 C19 118.1(6) . . ?
C23 C20 C21 123.3(8) . . ?
C19 C20 C21 118.1(8) . . ?
C22 C21 C20 113.1(9) . . ?
C22 C21 H21 123.5 . . ?
C20 C21 H21 123.5 . . ?
C21 C22 C17 117.3(8) . . ?
C21 C22 H22 121.3 . . ?
C17 C22 H22 121.3 . . ?
O2 C23 C20 129.5(7) . . ?
O2 C23 C24 111.6(9) . . ?
C20 C23 C24 118.9(8) . . ?
F1 C24 F3 107.7(10) . . ?
F1 C24 F2 105.7(12) . . ?
F3 C24 F2 105.5(12) . . ?
F1 C24 C23 113.7(11) . . ?
F3 C24 C23 113.2(11) . . ?
F2 C24 C23 110.5(9) . . ?
C26 C25 C30 120.9(8) . . ?
C26 C25 H25 119.5 . . ?
C30 C25 H25 119.5 . . ?
C27 C26 C25 118.3(9) . . ?
C27 C26 H26 120.8 . . ?
C25 C26 H26 120.8 . . ?
C28 C27 C26 121.4(9) . . ?
C28 C27 H27 119.3 . . ?
C26 C27 H27 119.3 . . ?
C27 C28 C29 120.7(9) . . ?
C27 C28 H28 119.7 . . ?
C29 C28 H28 119.7 . . ?
C30 C29 C28 118.9(8) . . ?
C30 C29 C34 118.5(6) . . ?
C28 C29 C34 122.5(7) . . ?
C29 C30 C25 119.7(6) . . ?
C29 C30 C31 121.2(6) . . ?
C25 C30 C31 119.1(6) . . ?
O3 C31 C32 123.3(5) . . ?
O3 C31 C30 117.7(6) . . ?
C32 C31 C30 118.9(6) . . ?
C35 C32 C31 119.0(5) . . ?
C35 C32 C33 124.1(6) . . ?
C31 C32 C33 116.9(5) . . ?
C34 C33 C32 110.3(6) . . ?
C34 C33 H33A 109.6 . . ?
C32 C33 H33A 109.6 . . ?
C34 C33 H33B 109.6 . . ?
C32 C33 H33B 109.6 . . ?
H33A C33 H33B 108.1 . . ?
C29 C34 C33 112.6(6) . . ?
C29 C34 H34A 109.1 . . ?
C33 C34 H34A 109.1 . . ?
C29 C34 H34B 109.1 . . ?
C33 C34 H34B 109.1 . . ?
H34A C34 H34B 107.8 . . ?
O4 C35 C32 128.6(6) . . ?
O4 C35 C36 113.0(6) . . ?
C32 C35 C36 118.4(6) . . ?
F4 C36 F6 107.2(7) . . ?
F4 C36 F5 107.6(8) . . ?
F6 C36 F5 106.8(8) . . ?
F4 C36 C35 112.0(7) . . ?
F6 C36 C35 112.8(8) . . ?
F5 C36 C35 110.1(6) . . ?
C42 C37 C38 122.7(9) . . ?
C42 C37 H37 118.7 . . ?
C38 C37 H37 118.7 . . ?
C39 C38 C37 115.9(11) . . ?
C39 C38 H38 122.1 . . ?
C37 C38 H38 122.1 . . ?
C40 C39 C38 122.9(13) . . ?
C40 C39 H39 118.5 . . ?
C38 C39 H39 118.5 . . ?
C39 C40 C41 116.9(13) . . ?
C39 C40 H40 121.5 . . ?
C41 C40 H40 121.5 . . ?
C42 C41 C40 121.9(12) . . ?
C42 C41 C46 117.7(10) . . ?
C40 C41 C46 119.7(11) . . ?
C41 C42 C37 118.4(9) . . ?
C41 C42 C43 121.3(8) . . ?
C37 C42 C43 120.3(6) . . ?
O5 C43 C44 123.6(6) . . ?
O5 C43 C42 117.1(6) . . ?
C44 C43 C42 119.3(6) . . ?
C47 C44 C43 119.8(5) . . ?
C47 C44 C45 120.6(6) . . ?
C43 C44 C45 119.5(7) . . ?
C46 C45 C44 114.2(8) . . ?
C46 C45 H45A 108.7 . . ?
C44 C45 H45A 108.7 . . ?
C46 C45 H45B 108.7 . . ?
C44 C45 H45B 108.7 . . ?
H45A C45 H45B 107.6 . . ?
C45 C46 C41 125.0(10) . . ?
C45 C46 H46A 106.1 . . ?
C41 C46 H46A 106.1 . . ?
C45 C46 H46B 106.1 . . ?
C41 C46 H46B 106.1 . . ?
H46A C46 H46B 106.3 . . ?
O6 C47 C44 127.8(6) . . ?
O6 C47 C48 112.6(7) . . ?
C44 C47 C48 119.5(6) . . ?
F7 C48 F8 108.6(11) . . ?
F7 C48 F9 107.0(10) . . ?
F8 C48 F9 106.6(7) . . ?
F7 C48 C47 111.8(7) . . ?
F8 C48 C47 111.6(9) . . ?
F9 C48 C47 111.1(9) . . ?
O3 Eu1 O1 98.98(14) . . ?
O3 Eu1 O4 69.54(13) . . ?
O1 Eu1 O4 77.84(13) . . ?
O3 Eu1 O2 80.01(15) . . ?
O1 Eu1 O2 68.98(15) . . ?
O4 Eu1 O2 130.24(15) . . ?
O3 Eu1 O5 74.38(14) . . ?
O1 Eu1 O5 145.73(14) . . ?
O4 Eu1 O5 127.46(13) . . ?
O2 Eu1 O5 76.75(15) . . ?
O3 Eu1 O6 91.89(15) . . ?
O1 Eu1 O6 145.10(14) . . ?
O4 Eu1 O6 75.14(14) . . ?
O2 Eu1 O6 145.88(16) . . ?
O5 Eu1 O6 69.16(14) . . ?
O3 Eu1 N2 146.12(15) . . ?
O1 Eu1 N2 97.54(13) . . ?
O4 Eu1 N2 143.30(15) . . ?
O2 Eu1 N2 78.66(16) . . ?
O5 Eu1 N2 75.31(15) . . ?
O6 Eu1 N2 91.21(15) . . ?
O3 Eu1 N1 150.73(15) . . ?
O1 Eu1 N1 71.39(13) . . ?
O4 Eu1 N1 81.31(14) . . ?
O2 Eu1 N1 119.22(14) . . ?
O5 Eu1 N1 128.95(15) . . ?
O6 Eu1 N1 82.99(14) . . ?
N2 Eu1 N1 63.05(16) . . ?
C1 N1 C5 117.9(5) . . ?
C1 N1 Eu1 122.1(4) . . ?
C5 N1 Eu1 119.4(4) . . ?
C12 N2 C6 117.8(6) . . ?
C12 N2 Eu1 121.8(4) . . ?
C6 N2 Eu1 120.4(4) . . ?
C19 O1 Eu1 140.5(4) . . ?
C23 O2 Eu1 136.3(5) . . ?
C31 O3 Eu1 137.0(4) . . ?
C35 O4 Eu1 131.9(4) . . ?
C43 O5 Eu1 132.0(4) . . ?
C47 O6 Eu1 131.0(4) . . ?
 
loop_
 _geom_torsion_atom_site_label_1
 _geom_torsion_atom_site_label_2
 _geom_torsion_atom_site_label_3
 _geom_torsion_atom_site_label_4
 _geom_torsion
 _geom_torsion_site_symmetry_1
 _geom_torsion_site_symmetry_2
 _geom_torsion_site_symmetry_3
 _geom_torsion_site_symmetry_4
 _geom_torsion_publ_flag
N1 C1 C2 C3 -0.6(10) . . . . ?
C1 C2 C3 C4 1.3(10) . . . . ?
C2 C3 C4 C5 -0.6(10) . . . . ?
C2 C3 C4 C9 179.7(7) . . . . ?
C3 C4 C5 N1 -1.0(9) . . . . ?
C9 C4 C5 N1 178.7(6) . . . . ?
C3 C4 C5 C6 176.6(6) . . . . ?
C9 C4 C5 C6 -3.7(9) . . . . ?
N1 C5 C6 N2 2.1(8) . . . . ?
C4 C5 C6 N2 -175.6(5) . . . . ?
N1 C5 C6 C7 -179.1(5) . . . . ?
C4 C5 C6 C7 3.2(8) . . . . ?
N2 C6 C7 C10 -0.4(9) . . . . ?
C5 C6 C7 C10 -179.2(6) . . . . ?
N2 C6 C7 C8 177.6(6) . . . . ?
C5 C6 C7 C8 -1.1(10) . . . . ?
C10 C7 C8 C9 177.4(9) . . . . ?
C6 C7 C8 C9 -0.5(13) . . . . ?
C7 C8 C9 C4 0.1(14) . . . . ?
C3 C4 C9 C8 -178.2(8) . . . . ?
C5 C4 C9 C8 2.1(12) . . . . ?
C8 C7 C10 C11 -177.6(8) . . . . ?
C6 C7 C10 C11 0.3(11) . . . . ?
C7 C10 C11 C12 -0.3(12) . . . . ?
C10 C11 C12 N2 0.5(11) . . . . ?
C18 C13 C14 C15 -1.4(13) . . . . ?
C13 C14 C15 C16 0.9(14) . . . . ?
C14 C15 C16 C17 0.8(14) . . . . ?
C15 C16 C17 C18 -1.9(12) . . . . ?
C15 C16 C17 C22 177.0(9) . . . . ?
C14 C13 C18 C17 0.2(12) . . . . ?
C14 C13 C18 C19 -178.3(7) . . . . ?
C16 C17 C18 C13 1.4(10) . . . . ?
C22 C17 C18 C13 -177.6(8) . . . . ?
C16 C17 C18 C19 179.9(6) . . . . ?
C22 C17 C18 C19 0.8(10) . . . . ?
C13 C18 C19 O1 10.7(9) . . . . ?
C17 C18 C19 O1 -167.8(6) . . . . ?
C13 C18 C19 C20 -168.3(7) . . . . ?
C17 C18 C19 C20 13.3(9) . . . . ?
O1 C19 C20 C23 -5.3(11) . . . . ?
C18 C19 C20 C23 173.6(6) . . . . ?
O1 C19 C20 C21 -177.2(7) . . . . ?
C18 C19 C20 C21 1.7(11) . . . . ?
C23 C20 C21 C22 157.2(10) . . . . ?
C19 C20 C21 C22 -31.3(14) . . . . ?
C20 C21 C22 C17 46.3(14) . . . . ?
C18 C17 C22 C21 -32.5(13) . . . . ?
C16 C17 C22 C21 148.6(9) . . . . ?
C19 C20 C23 O2 0.0(12) . . . . ?
C21 C20 C23 O2 171.5(8) . . . . ?
C19 C20 C23 C24 -178.6(9) . . . . ?
C21 C20 C23 C24 -7.1(13) . . . . ?
O2 C23 C24 F1 -121.3(11) . . . . ?
C20 C23 C24 F1 57.5(15) . . . . ?
O2 C23 C24 F3 115.4(11) . . . . ?
C20 C23 C24 F3 -65.8(14) . . . . ?
O2 C23 C24 F2 -2.7(14) . . . . ?
C20 C23 C24 F2 176.1(10) . . . . ?
C30 C25 C26 C27 -0.9(14) . . . . ?
C25 C26 C27 C28 2.3(17) . . . . ?
C26 C27 C28 C29 -3.6(16) . . . . ?
C27 C28 C29 C30 3.5(12) . . . . ?
C27 C28 C29 C34 179.8(8) . . . . ?
C28 C29 C30 C25 -2.2(10) . . . . ?
C34 C29 C30 C25 -178.6(6) . . . . ?
C28 C29 C30 C31 176.9(6) . . . . ?
C34 C29 C30 C31 0.4(9) . . . . ?
C26 C25 C30 C29 0.9(11) . . . . ?
C26 C25 C30 C31 -178.1(7) . . . . ?
C29 C30 C31 O3 -164.1(6) . . . . ?
C25 C30 C31 O3 15.0(9) . . . . ?
C29 C30 C31 C32 15.0(9) . . . . ?
C25 C30 C31 C32 -165.9(6) . . . . ?
O3 C31 C32 C35 4.7(9) . . . . ?
C30 C31 C32 C35 -174.3(5) . . . . ?
O3 C31 C32 C33 -174.9(6) . . . . ?
C30 C31 C32 C33 6.0(8) . . . . ?
C35 C32 C33 C34 141.3(6) . . . . ?
C31 C32 C33 C34 -39.1(8) . . . . ?
C30 C29 C34 C33 -35.2(9) . . . . ?
C28 C29 C34 C33 148.4(7) . . . . ?
C32 C33 C34 C29 53.3(8) . . . . ?
C31 C32 C35 O4 -0.8(10) . . . . ?
C33 C32 C35 O4 178.8(6) . . . . ?
C31 C32 C35 C36 177.6(7) . . . . ?
C33 C32 C35 C36 -2.8(10) . . . . ?
O4 C35 C36 F4 -123.6(7) . . . . ?
C32 C35 C36 F4 57.7(10) . . . . ?
O4 C35 C36 F6 115.3(7) . . . . ?
C32 C35 C36 F6 -63.4(9) . . . . ?
O4 C35 C36 F5 -3.9(11) . . . . ?
C32 C35 C36 F5 177.4(7) . . . . ?
C42 C37 C38 C39 -0.3(19) . . . . ?
C37 C38 C39 C40 8(2) . . . . ?
C38 C39 C40 C41 -14(2) . . . . ?
C39 C40 C41 C42 12(2) . . . . ?
C39 C40 C41 C46 -177.8(14) . . . . ?
C40 C41 C42 C37 -4.8(18) . . . . ?
C46 C41 C42 C37 -175.2(11) . . . . ?
C40 C41 C42 C43 175.1(11) . . . . ?
C46 C41 C42 C43 4.7(17) . . . . ?
C38 C37 C42 C41 -1.2(16) . . . . ?
C38 C37 C42 C43 178.8(10) . . . . ?
C41 C42 C43 O5 -176.9(9) . . . . ?
C37 C42 C43 O5 3.0(10) . . . . ?
C41 C42 C43 C44 5.3(12) . . . . ?
C37 C42 C43 C44 -174.8(7) . . . . ?
O5 C43 C44 C47 -4.8(10) . . . . ?
C42 C43 C44 C47 172.8(6) . . . . ?
O5 C43 C44 C45 179.3(7) . . . . ?
C42 C43 C44 C45 -3.0(10) . . . . ?
C47 C44 C45 C46 175.2(9) . . . . ?
C43 C44 C45 C46 -8.9(13) . . . . ?
C44 C45 C46 C41 20.4(19) . . . . ?
C42 C41 C46 C45 -19(2) . . . . ?
C40 C41 C46 C45 170.4(13) . . . . ?
C43 C44 C47 O6 9.6(11) . . . . ?
C45 C44 C47 O6 -174.5(7) . . . . ?
C43 C44 C47 C48 -171.9(8) . . . . ?
C45 C44 C47 C48 3.9(12) . . . . ?
O6 C47 C48 F7 -7.6(14) . . . . ?
C44 C47 C48 F7 173.7(9) . . . . ?
O6 C47 C48 F8 114.2(8) . . . . ?
C44 C47 C48 F8 -64.5(11) . . . . ?
O6 C47 C48 F9 -127.0(8) . . . . ?
C44 C47 C48 F9 54.3(12) . . . . ?
C2 C1 N1 C5 -1.0(8) . . . . ?
C2 C1 N1 Eu1 -171.9(5) . . . . ?
C4 C5 N1 C1 1.8(8) . . . . ?
C6 C5 N1 C1 -175.8(5) . . . . ?
C4 C5 N1 Eu1 173.0(4) . . . . ?
C6 C5 N1 Eu1 -4.6(6) . . . . ?
C11 C12 N2 C6 -0.6(9) . . . . ?
C11 C12 N2 Eu1 177.2(5) . . . . ?
C5 C6 N2 C12 179.3(5) . . . . ?
C7 C6 N2 C12 0.6(8) . . . . ?
C5 C6 N2 Eu1 1.5(7) . . . . ?
C7 C6 N2 Eu1 -177.3(4) . . . . ?
C20 C19 O1 Eu1 -5.4(10) . . . . ?
C18 C19 O1 Eu1 175.7(4) . . . . ?
C20 C23 O2 Eu1 16.0(12) . . . . ?
C24 C23 O2 Eu1 -165.3(7) . . . . ?
C32 C31 O3 Eu1 21.8(9) . . . . ?
C30 C31 O3 Eu1 -159.2(4) . . . . ?
C32 C35 O4 Eu1 -27.7(9) . . . . ?
C36 C35 O4 Eu1 153.8(5) . . . . ?
C44 C43 O5 Eu1 -33.0(9) . . . . ?
C42 C43 O5 Eu1 149.3(5) . . . . ?
C44 C47 O6 Eu1 22.7(11) . . . . ?
C48 C47 O6 Eu1 -155.8(7) . . . . ?
 
loop_
 _geom_hbond_atom_site_label_D 
 _geom_hbond_atom_site_label_H 
 _geom_hbond_atom_site_label_A 
 _geom_hbond_distance_DH 
 _geom_hbond_distance_HA 
 _geom_hbond_distance_DA 
 _geom_hbond_angle_DHA 
 _geom_hbond_site_symmetry_A 
C45 H45B F8  0.97 2.41 2.976(11) 116.7 .
C45 H45A F9  0.97 2.36 2.875(11) 112.2 .
C37 H37 O5  0.93 2.40 2.728(9) 100.4 .
C33 H33B F6  0.97 2.38 3.078(9) 128.7 .
C33 H33B F4  0.97 2.45 2.930(9) 109.9 .
C21 H21 F1  0.93 2.37 2.899(15) 116.0 .
C13 H13 O1  0.93 2.43 2.742(8) 99.7 .
C12 H12 O5  0.93 2.48 3.037(8) 119.0 .
C1 H1 O4  0.93 2.55 3.201(7) 127.1 .
 
_refine_diff_density_max    0.681
_refine_diff_density_min   -0.798
_refine_diff_density_rms    0.082

_shelx_res_file
;

    HD61S5_0m.res created by SHELXL-2014/7

TITL HD61S5_0m in  P21/n
CELL  0.71073   21.0050    9.6340   22.9890    90.000   105.155    90.000
ZERR        4    0.0020    0.0009    0.0020     0.000     0.001     0.000
LATT 1
SYMM     0.50000 - X ,    0.50000 + Y ,    0.50000 - Z
SFAC C  H  Eu F  N  O
UNIT 192 120 4 36 8 24
L.S. 10
ACTA
BOND $H
FMAP 2
PLAN 0
HTAB C45 F8
HTAB C45 F9
HTAB C37 O5
HTAB C33 F6
HTAB C33 F4
HTAB C21 F1
HTAB C13 O1
HTAB C12 O5
HTAB C1 O4
HTAB
SIZE 0.260 0.280 0.320
isor 0.005 F5 F7
EADP C46 C41
isor 0.01 C15  C17 C16 C40  C39 C21 C41
DFIX 1.44 0.01 C45 C46
CONF
TEMP   23
WGHT    0.066700
FVAR       0.23415
C1    1    0.080156    0.128984    1.048456    11.00000    0.06784    0.07585 =
         0.07909    0.00381    0.01996   -0.00343
AFIX  43
H1    2    0.071846    0.221038    1.036744    11.00000   -1.20000
AFIX   0
C2    1    0.033947    0.058744    1.071146    11.00000    0.07646    0.10636 =
         0.08786   -0.00160    0.03195   -0.01119
AFIX  43
H2    2   -0.004085    0.103383    1.074771    11.00000   -1.20000
AFIX   0
C3    1    0.045340   -0.076303    1.087934    11.00000    0.08688    0.10193 =
         0.08450    0.01028    0.02939   -0.04188
AFIX  43
H3    2    0.014491   -0.125207    1.102389    11.00000   -1.20000
AFIX   0
C4    1    0.102681   -0.141100    1.083565    11.00000    0.09595    0.07969 =
         0.07478    0.00174    0.02362   -0.02883
C5    1    0.147598   -0.062746    1.060818    11.00000    0.07668    0.06237 =
         0.05490   -0.00449    0.01203   -0.01835
C6    1    0.208659   -0.123091    1.058707    11.00000    0.09674    0.05267 =
         0.05708   -0.00226    0.01437   -0.00019
C7    1    0.222536   -0.264467    1.076670    11.00000    0.12768    0.05573 =
         0.07563    0.00587    0.02078   -0.00884
C8    1    0.175141   -0.338423    1.096948    11.00000    0.15853    0.05932 =
         0.12798    0.01345    0.02939   -0.00852
AFIX  43
H8    2    0.183919   -0.430558    1.108308    11.00000   -1.20000
AFIX   0
C9    1    0.117981   -0.283736    1.100856    11.00000    0.13185    0.07598 =
         0.11461    0.02859    0.03808   -0.03102
AFIX  43
H9    2    0.088141   -0.337380    1.114671    11.00000   -1.20000
AFIX   0
C10   1    0.283805   -0.316640    1.074248    11.00000    0.12843    0.07187 =
         0.09685   -0.00164    0.02505    0.02706
AFIX  43
H10   2    0.294702   -0.408196    1.085337    11.00000   -1.20000
AFIX   0
C11   1    0.326012   -0.238430    1.056596    11.00000    0.12638    0.08615 =
         0.07997    0.00798    0.02513    0.04015
AFIX  43
H11   2    0.366845   -0.273571    1.055267    11.00000   -1.20000
AFIX   0
C12   1    0.308981   -0.101375    1.039755    11.00000    0.10210    0.07919 =
         0.06844    0.00761    0.02212    0.01610
AFIX  43
H12   2    0.339423   -0.047215    1.027012    11.00000   -1.20000
AFIX   0
C13   1    0.154453    0.347101    1.195103    11.00000    0.13030    0.12225 =
         0.07097   -0.02004    0.03362    0.00634
AFIX  43
H13   2    0.132482    0.297490    1.161065    11.00000   -1.20000
AFIX   0
C14   1    0.120303    0.389161    1.235871    11.00000    0.16259    0.13937 =
         0.08104   -0.01334    0.04748    0.02351
AFIX  43
H14   2    0.075566    0.370593    1.229582    11.00000   -1.20000
AFIX   0
C15   1    0.155477    0.460146    1.286507    11.00000    0.18175    0.11614 =
         0.07762   -0.00552    0.04990    0.03653
AFIX  43
H15   2    0.134013    0.488671    1.315074    11.00000   -1.20000
AFIX   0
C16   1    0.219389    0.488481    1.295206    11.00000    0.16618    0.09755 =
         0.07037   -0.01577    0.00836    0.02365
AFIX  43
H16   2    0.241262    0.535390    1.330061    11.00000   -1.20000
AFIX   0
C17   1    0.254926    0.450407    1.253927    11.00000    0.14216    0.08850 =
         0.05449   -0.00846    0.00843    0.01733
C18   1    0.219626    0.376835    1.203767    11.00000    0.12013    0.06613 =
         0.05045    0.00170    0.00993    0.00650
C19   1    0.254052    0.333014    1.157787    11.00000    0.10161    0.05895 =
         0.05307   -0.00513    0.00629   -0.00403
C20   1    0.324250    0.341063    1.172481    11.00000    0.08609    0.10317 =
         0.07352   -0.01994   -0.00144   -0.00880
C21   1    0.360585    0.390547    1.235546    11.00000    0.14177    0.17907 =
         0.12595   -0.05283   -0.01161   -0.01226
AFIX  43
H21   2    0.402589    0.360407    1.255813    11.00000   -1.20000
AFIX   0
C22   1    0.324964    0.483857    1.259186    11.00000    0.14070    0.14827 =
         0.13358   -0.07289   -0.03494   -0.01789
AFIX  43
H22   2    0.344031    0.564994    1.277799    11.00000   -1.20000
AFIX   0
C23   1    0.355659    0.287694    1.132217    11.00000    0.06500    0.09104 =
         0.08781    0.01712   -0.00941   -0.01809
C24   1    0.431199    0.292216    1.147842    11.00000    0.09374    0.21208 =
         0.13074   -0.01291   -0.00043   -0.02091
C25   1    0.351600    0.555951    0.928945    11.00000    0.10713    0.07866 =
         0.12981    0.00143    0.05249   -0.01945
AFIX  43
H25   2    0.364353    0.470901    0.947474    11.00000   -1.20000
AFIX   0
C26   1    0.397056    0.635491    0.910157    11.00000    0.10532    0.11567 =
         0.20321   -0.00099    0.08413   -0.02447
AFIX  43
H26   2    0.440439    0.605785    0.916307    11.00000   -1.20000
AFIX   0
C27   1    0.376626    0.759865    0.882093    11.00000    0.14826    0.13194 =
         0.15803    0.00055    0.08467   -0.05202
AFIX  43
H27   2    0.406317    0.813088    0.867892    11.00000   -1.20000
AFIX   0
C28   1    0.314288    0.806405    0.874711    11.00000    0.16034    0.07713 =
         0.10401    0.00061    0.05323   -0.03556
AFIX  43
H28   2    0.302437    0.893223    0.857611    11.00000   -1.20000
AFIX   0
C29   1    0.267878    0.726116    0.892352    11.00000    0.11219    0.06343 =
         0.06816    0.00035    0.03855   -0.00891
C30   1    0.287195    0.600951    0.920609    11.00000    0.07964    0.06579 =
         0.08215   -0.00506    0.03394   -0.01351
C31   1    0.240472    0.514113    0.943197    11.00000    0.07660    0.06419 =
         0.06893    0.00782    0.02560   -0.00278
C32   1    0.171630    0.543079    0.923090    11.00000    0.07423    0.06899 =
         0.06220    0.00940    0.02172    0.00212
C33   1    0.150267    0.654002    0.874088    11.00000    0.11582    0.09053 =
         0.07688    0.02947    0.02869    0.01001
AFIX  23
H33A  2    0.147621    0.613321    0.834930    11.00000   -1.20000
H33B  2    0.106867    0.688550    0.874005    11.00000   -1.20000
AFIX   0
C34   1    0.199158    0.773085    0.885285    11.00000    0.15007    0.06074 =
         0.07118    0.01509    0.03398    0.00353
AFIX  23
H34A  2    0.187164    0.837651    0.851820    11.00000   -1.20000
H34B  2    0.196553    0.822132    0.921440    11.00000   -1.20000
AFIX   0
C35   1    0.128469    0.470438    0.948079    11.00000    0.06804    0.06392 =
         0.06977    0.00748    0.01771    0.00763
C36   1    0.054350    0.507131    0.927584    11.00000    0.07328    0.13815 =
         0.11825    0.05992    0.02299    0.01155
C37   1    0.420034    0.147495    0.932668    11.00000    0.08251    0.16582 =
         0.12792    0.03317    0.04450    0.01064
AFIX  43
H37   2    0.416287    0.126221    0.971094    11.00000   -1.20000
AFIX   0
C38   1    0.482008    0.148343    0.922492    11.00000    0.07347    0.24186 =
         0.16426    0.04275    0.02549    0.00873
AFIX  43
H38   2    0.519878    0.128749    0.952838    11.00000   -1.20000
AFIX   0
C39   1    0.484248    0.179926    0.864765    11.00000    0.17791    0.25352 =
         0.19761    0.01032    0.09916    0.01833
AFIX  43
H39   2    0.524113    0.170042    0.854709    11.00000   -1.20000
AFIX   0
C40   1    0.430825    0.224941    0.821734    11.00000    0.17474    0.27511 =
         0.15126    0.02380    0.08008   -0.01899
AFIX  43
H40   2    0.434986    0.264160    0.785946    11.00000   -1.20000
AFIX   0
C41   1    0.370121    0.209789    0.833578    11.00000    0.14763    0.30338 =
         0.10483    0.04149    0.05615   -0.01766
C42   1    0.364291    0.176496    0.888792    11.00000    0.08843    0.09440 =
         0.08008    0.00115    0.04235    0.00389
C43   1    0.299649    0.171413    0.901950    11.00000    0.08475    0.06437 =
         0.06514    0.00656    0.03348    0.01034
C44   1    0.241873    0.190669    0.854499    11.00000    0.08942    0.10338 =
         0.04719    0.01734    0.02098    0.01584
C45   1    0.247965    0.223204    0.791825    11.00000    0.13034    0.23299 =
         0.06799    0.04605    0.03847    0.02367
AFIX  23
H45A  2    0.231143    0.145066    0.765716    11.00000   -1.20000
H45B  2    0.220480    0.302887    0.776443    11.00000   -1.20000
AFIX   0
C46   1    0.311285    0.250763    0.788968    11.00000    0.14763    0.30338 =
         0.10483    0.04149    0.05615   -0.01766
AFIX  23
H46A  2    0.314007    0.350720    0.785157    11.00000   -1.20000
H46B  2    0.315109    0.211964    0.751093    11.00000   -1.20000
AFIX   0
C47   1    0.180678    0.170897    0.864998    11.00000    0.08428    0.09546 =
         0.05253   -0.00321    0.01694    0.00578
C48   1    0.117932    0.172851    0.811135    11.00000    0.10442    0.24659 =
         0.05268    0.00707    0.01737   -0.00254
EU1   3    0.226960    0.213613    1.013402    11.00000    0.06000    0.05753 =
         0.04609    0.00483    0.01288    0.00078
F1    4    0.459641    0.229920    1.198068    11.00000    0.08783    0.32231 =
         0.18850    0.01286   -0.04486   -0.00751
F2    4    0.453332    0.227687    1.105022    11.00000    0.07193    0.35311 =
         0.21504   -0.07452    0.02243   -0.02995
F3    4    0.454717    0.417745    1.150737    11.00000    0.15001    0.27276 =
         0.30612   -0.05885    0.05882   -0.13844
F4    4    0.030404    0.493541    0.868878    11.00000    0.08746    0.21973 =
         0.12628    0.04486   -0.01618    0.01376
F5    4    0.020217    0.423854    0.954088    11.00000    0.08103    0.18259 =
         0.17684    0.07539    0.03581    0.01645
F6    4    0.041904    0.635479    0.941642    11.00000    0.13837    0.13595 =
         0.20420    0.06367    0.08265    0.07669
F7    4    0.066349    0.140059    0.827393    11.00000    0.10598    0.37051 =
         0.09800   -0.01907    0.01689   -0.02908
F8    4    0.108536    0.296121    0.785027    11.00000    0.16460    0.28916 =
         0.10068    0.02884   -0.01129    0.08220
F9    4    0.123209    0.082161    0.768590    11.00000    0.15119    0.25597 =
         0.07825   -0.05393    0.01264   -0.01678
N1    5    0.135506    0.070985    1.042720    11.00000    0.06564    0.05829 =
         0.05233   -0.00116    0.01451   -0.01076
N2    5    0.252435   -0.044358    1.040848    11.00000    0.08092    0.06760 =
         0.04887    0.00304    0.01694    0.00859
O1    6    0.218495    0.288858    1.108228    11.00000    0.07333    0.07556 =
         0.04620   -0.00927    0.00789   -0.00039
O2    6    0.331662    0.230022    1.081993    11.00000    0.05938    0.10721 =
         0.07305    0.00247    0.00522    0.00023
O3    6    0.264281    0.418559    0.980241    11.00000    0.06221    0.06516 =
         0.09615    0.01962    0.02070   -0.00201
O4    6    0.141201    0.376742    0.987508    11.00000    0.07125    0.06851 =
         0.07059    0.01922    0.02617    0.00567
O5    6    0.299001    0.145319    0.955619    11.00000    0.08198    0.08862 =
         0.05598    0.01685    0.02467    0.02231
O6    6    0.167580    0.153182    0.914677    11.00000    0.08201    0.10543 =
         0.05234   -0.00596    0.01861   -0.00785
HKLF 4

REM  HD61S5_0m in  P21/n
REM R1 =  0.0507 for    5646 Fo > 4sig(Fo)  and  0.1224 for all   11190 data
REM    589 parameters refined using     55 restraints

END

WGHT      0.0599      0.0000

REM Instructions for potential hydrogen bonds
HTAB C1 O4
EQIV $1 -x, -y+1, -z+2
HTAB C2 F6_$1
HTAB C12 O5

REM Highest difference peak  0.681,  deepest hole -0.798,  1-sigma level  0.082
Q1    1   0.3092  0.1227  0.7824  11.00000  0.05    0.68
Q2    1   0.4360  0.1179  0.8231  11.00000  0.05    0.59
Q3    1   0.2226  0.3657  1.0091  11.00000  0.05    0.57
Q4    1   0.2795  0.2881  0.7980  11.00000  0.05    0.49
Q5    1   0.3448  0.4954  1.2093  11.00000  0.05    0.48
Q6    1   0.0627  0.2277  0.8336  11.00000  0.05    0.47
Q7    1   0.0712  0.0201  0.8326  11.00000  0.05    0.46
Q8    1   0.2760  0.1611  0.9849  11.00000  0.05    0.45
Q9    1   0.1792  0.2945  0.9831  11.00000  0.05    0.40
Q10   1   0.3670  0.2474  0.8254  11.00000  0.05    0.40
Q11   1   0.3390  0.2200  0.9066  11.00000  0.05    0.40
Q12   1   0.2212  0.2902  1.0651  11.00000  0.05    0.39
Q13   1   0.2645  0.2773  0.9844  11.00000  0.05    0.37
Q14   1   0.2743  0.2757  1.0571  11.00000  0.05    0.37
Q15   1   0.3750  0.1322  0.8453  11.00000  0.05    0.36
Q16   1   0.3189  0.2128  0.9570  11.00000  0.05    0.36
Q17   1   0.4803  0.2819  0.8589  11.00000  0.05    0.36
Q18   1   0.2012  0.2132  0.9379  11.00000  0.05    0.34
Q19   1   0.1668  0.1963  0.9566  11.00000  0.05    0.34
Q20   1   0.1789  0.3202  1.0283  11.00000  0.05    0.33
;
_shelx_res_checksum   10338

_shelx_hkl_file
;
  -3   0   0 2.26781 1.63134   2
   3   0   0 -1.9133  1.5148   1
   4   0   0 1339.84   35.49   1
  -4   0   0 1300.94   33.46   3
  -4   0   0 1317.00   34.06   2
  -5   0   0 -6.7761  1.4289   3
   5   0   0 -1.1536  2.7563   1
  -5   0   0 0.52020 3.03066   2
  -6   0   0 397.025  14.796   2
   6   0   0 376.288  16.141   1
  -6   0   0 381.049  13.698   3
  -7   0   0 2.76508 2.79216   2
   7   0   0 3.39413 3.10034   1
  -7   0   0 2.12080 2.70647   3
   8   0   0 318.819  16.210   1
  -8   0   0 303.706  12.993   3
  -8   0   0 312.340  14.273   2
  -9   0   0 -5.1972  2.5893   3
  -9   0   0 -4.0344  3.5492   2
   9   0   0 -1.7672  3.9400   1
 -10   0   0 889.953  28.238   3
  10   0   0 910.930  33.977   1
 -10   0   0 820.734  29.345   2
  11   0   0 2.32303 5.11009   1
 -11   0   0 -3.3377  3.5002   3
 -11   0   0 7.22922 4.84809   2
  12   0   0 225.348  16.982   1
 -12   0   0 232.704  13.435   3
 -12   0   0 237.940  14.502   2
  13   0   0 -6.0279  4.0565   1
 -13   0   0 2.27590 4.48964   2
 -13   0   0 6.05197 4.67773   3
 -14   0   0 21.5484  7.3302   2
 -14   0   0 40.5642  7.8646   3
  14   0   0 26.9683  9.0040   1
 -15   0   0 -3.9061  5.1599   3
 -15   0   0 2.41957 5.72302   2
  15   0   0 5.29342 6.57365   1
 -16   0   0 164.696  15.353   3
 -16   0   0 159.187  16.379   2
  16   0   0 138.267  18.416   1
 -17   0   0 -3.4871  6.5531   2
  17   0   0 -2.4393  6.9815   1
  18   0   0 63.3665 14.2396   1
 -18   0   0 94.1490 14.0847   2
  19   0   0 -12.151   6.008   1
 -19   0   0 2.19811 7.33947   2
 -20   0   0 108.912  16.163   2
  20   0   0 159.633  22.083   1
  21   0   0 -2.4162  8.1751   1
  22   0   0 81.4698 18.0292   1
  23   0   0 3.59142 8.95693   1
  24   0   0  9.6895 11.2614   1
  25   0   0 -0.3512 11.8074   1
  26   0   0  6.5960 12.2760   1
  27   0   0 -1.9859 11.5942   1
  -1  -1   0 27.0541  3.0568   2
  -1  -1   0 30.1545  3.1652   1
   2  -1   0 9.96768 2.06940   1
  -2  -1   0 18.5494  2.7513   2
  -2  -1   0 13.8352  2.4992   1
   2   1   0 12.8333  2.2126   1
  -3  -1   0 204.385   8.930   2
   3  -1   0 212.136   8.617   1
   3   1   0 217.019   8.450   1
   4  -1   0 1649.23   42.59   1
  -4  -1   0 1650.58   43.15   2
  -4   1   0 1662.04   40.20   2
   4   1   0 1634.51   42.15   1
  -5  -1   0 156.347   8.737   2
   5  -1   0 156.733   9.066   1
  -5   1   0 154.427   8.772   3
  -5   1   0 144.165   7.360   2
   5   1   0 150.719   8.351   1
   6  -1   0 54.2568  6.9097   1
  -6  -1   0 55.1836  3.9041   3
  -6  -1   0 60.7707  6.8976   2
   6   1   0 59.6463  6.8821   1
  -6   1   0 62.7597  6.8490   3
  -6   1   0 58.8267  5.9067   2
  -7  -1   0 257.280   9.436   3
  -7  -1   0 248.221  12.916   2
   7  -1   0 279.870  14.018   1
   7   1   0 251.272  13.206   1
  -7   1   0 259.723  11.313   2
  -7   1   0 253.302  12.471   3
  -8  -1   0 2830.09   74.33   2
  -8  -1   0 2975.59   69.10   3
   8  -1   0 2792.27   75.23   1
   8   1   0 2777.46   74.96   1
  -8   1   0 2870.88   73.99   3
  -8   1   0 2762.27   71.06   2
   9  -1   0 39.5400  7.7007   1
  -9  -1   0 39.7259  5.0329   3
  -9  -1   0 43.3457  7.1853   2
  -9   1   0 31.6724  5.7291   2
   9   1   0 17.0821  5.8009   1
  -9   1   0 36.4726  6.7005   3
  10  -1   0 1243.05   42.44   1
 -10  -1   0 1260.55   40.44   2
 -10  -1   0 1347.12   35.44   3
 -10   1   0 1188.91   38.92   3
  10   1   0 1301.89   42.70   1
 -10   1   0 1245.49   37.77   2
 -11  -1   0 52.9465  8.8160   2
 -11  -1   0 57.8122  6.7307   3
  11  -1   0 53.9133  9.8028   1
 -11   1   0 53.4570  8.3617   3
 -11   1   0 76.5896  9.0562   2
  11   1   0 59.3282  9.9594   1
 -12  -1   0 660.787  27.678   2
  12  -1   0 621.415  29.271   1
 -12  -1   0 684.379  22.984   3
 -12   1   0 698.362  26.860   3
  12   1   0 718.250  30.812   1
 -12   1   0 682.418  25.785   2
  13  -1   0 69.8409 12.0754   1
 -13  -1   0 92.6735 12.4197   2
 -13  -1   0 98.7116  9.5084   3
 -13   1   0 90.5351 11.4087   3
  13   1   0 90.9385 12.9336   1
 -13   1   0 110.117  11.432   2
 -14  -1   0 547.060  21.448   3
  14  -1   0 576.373  29.595   1
 -14  -1   0 565.755  26.628   2
 -14   1   0 562.225  24.104   2
 -14   1   0 496.275  23.755   3
  14   1   0 572.219  29.310   1
  15  -1   0 21.0264  9.3212   1
 -15  -1   0 6.33848 7.03748   2
 -15   1   0 16.5470  7.0830   3
 -15   1   0 31.3967  8.0854   2
  15   1   0 13.5636  7.7161   1
  16  -1   0 140.299  18.022   1
 -16  -1   0 146.806  17.116   2
 -16   1   0 162.337  16.251   3
 -16   1   0 175.565  16.606   2
  16   1   0 142.609  18.587   1
 -17  -1   0 16.6554  8.5661   2
  17  -1   0 20.8613  9.3431   1
 -17   1   0 9.61948 7.11188   2
  17   1   0 21.4029 10.4927   1
 -17   1   0 6.63742 7.12842   3
  18  -1   0 86.4162 15.9251   1
 -18  -1   0 88.0881 13.6752   2
 -18   1   0 49.6479 10.9059   3
  18   1   0 83.7667 15.6783   1
 -19  -1   0 0.56040 7.58570   2
  19  -1   0 -0.6678  7.6366   1
  19   1   0 0.14770 7.32282   1
 -20  -1   0 -3.7443  7.3830   2
  20  -1   0 -4.2913  7.4033   1
  20   1   0 6.26940 9.31421   1
  21  -1   0 -7.7370  7.4419   1
 -21  -1   0 2.78075 8.52100   2
  21   1   0 2.59850 8.56720   1
  22  -1   0 -5.7062  7.9194   1
 -22  -1   0 0.99421 7.65422   2
  22   1   0 -0.6309  8.3626   1
  23  -1   0 3.07021 8.74569   1
  23   1   0 -3.0760 10.7676   1
  24  -1   0 8.01338 9.59721   1
  24   1   0 2.13992 9.46145   1
  25  -1   0 -4.6850  8.7933   1
  25   1   0 -6.7517  9.9555   1
  26  -1   0 22.1643 11.4228   1
  26   1   0 -6.3934 10.4913   1
  27  -1   0  3.2389 11.2942   1
  27   1   0  0.8186 11.4082   1
   0  -2   0 7096.24  161.59   1
   0  -2   0 7041.52  162.27   2
  -1  -2   0 597.776  19.174   2
   1  -2   0 653.064  19.739   1
  -1  -2   0 637.289  19.869   1
   1  -2   0 716.878  18.453   2
  -2  -2   0 3246.70   81.09   2
   2  -2   0 3443.17   80.25   1
   2  -2   0 3435.70   78.07   2
  -2  -2   0 3302.00   80.30   1
  -3  -2   0 4.28445 2.78861   2
   3  -2   0 2.23893 2.42918   1
  -3  -2   0 2.58768 2.77097   1
  -3   2   0 1.33878 1.30052   2
   3   2   0 5.51048 2.52059   1
  -4  -2   0 609.663  21.234   2
   4  -2   0 623.726  20.499   1
  -4  -2   0 662.210  21.333   1
  -4   2   0 639.435  16.893   2
   4   2   0 649.779  20.492   1
   5  -2   0 224.620  11.069   1
  -5  -2   0 238.626  11.833   2
  -5   2   0 226.258   8.011   2
   5   2   0 201.627  10.301   1
  -6  -2   0 734.681  25.471   2
   6  -2   0 740.570  24.709   1
  -6   2   0 740.526  20.499   2
   6   2   0 717.261  24.057   1
  -7  -2   0 -1.2675  2.7334   2
   7  -2   0 -5.8031  2.6514   1
  -7   2   0 -1.2871  2.9424   3
  -7   2   0 4.23412 3.00604   2
   7   2   0 5.18934 3.16702   1
  -8  -2   0 -9.3104  3.0729   2
   8  -2   0 -5.1010  2.0841   1
  -8   2   0 1.39174 3.14721   2
  -8   2   0 2.85280 3.82766   3
   8   2   0 2.23241 3.48666   1
   9  -2   0 60.9777  8.9192   1
  -9  -2   0 62.8795  4.0850   3
  -9   2   0 64.0981  7.1316   2
  -9   2   0 41.5988  7.5172   3
  10  -2   0 39.8678  8.2371   1
 -10  -2   0 19.4706  6.7426   2
 -10  -2   0 33.3160  3.6707   3
 -10   2   0 49.5356  8.4582   3
 -10   2   0 43.9927  6.6614   2
  10   2   0 32.6682  7.2058   1
  11  -2   0 0.00899 3.57756   1
 -11  -2   0 -4.8638  2.3362   3
 -11  -2   0 -6.4363  3.2334   2
 -11   2   0 -0.2205  3.7117   3
  11   2   0 7.42582 5.10188   1
 -11   2   0 6.32372 4.28592   2
 -12  -2   0 24.5060  7.1100   2
  12  -2   0 19.8714  7.6573   1
 -12   2   0 20.7265  7.1255   3
 -12   2   0 16.7431  5.3024   2
  12   2   0 24.2888  7.8977   1
 -13  -2   0 19.0435  7.5143   2
  13  -2   0 4.38870 5.43673   1
 -13   2   0 10.2572  6.5277   3
 -13   2   0 16.0058  5.9560   2
  13   2   0 16.4678  7.3698   1
 -14  -2   0 68.9689 11.8375   2
  14  -2   0 73.5996 12.2302   1
 -14   2   0 93.4468 12.5529   3
  14   2   0 91.9591 13.9021   1
 -14   2   0 98.3433 11.3568   2
  15  -2   0 14.4598  8.1792   1
 -15  -2   0 10.6820  7.7443   2
 -15   2   0 13.8542  7.5892   3
  15   2   0 0.53563 5.99748   1
 -15   2   0 43.1848  8.2309   2
 -16  -2   0 103.243  14.633   2
  16  -2   0 122.358  16.880   1
  16   2   0 101.104  16.097   1
 -16   2   0 81.1051 12.9787   3
  17  -2   0 11.1764  7.7897   1
 -17  -2   0 36.7763 10.4830   2
 -17   2   0 13.9615  8.6917   3
  17   2   0 42.3473 11.4265   1
 -18  -2   0 182.335  20.876   2
  18  -2   0 137.670  19.151   1
  18   2   0 162.843  20.977   1
 -18   2   0 171.074  19.305   3
 -19  -2   0 19.8740 10.2321   2
  19  -2   0 31.1598 11.4644   1
 -19   2   0 22.3794  9.3420   3
  19   2   0 22.0493 11.2452   1
  20  -2   0 72.5191 16.0655   1
 -20  -2   0 69.9686 15.6324   2
  20   2   0 66.2288 17.1333   1
 -21  -2   0 22.4430 10.7089   2
  21  -2   0 37.9939 13.6278   1
  21   2   0 27.0564 12.0166   1
  22  -2   0 5.59270 9.63578   1
 -22  -2   0 27.4406 11.5811   2
  22   2   0 27.2604 12.6950   1
 -23  -2   0 -4.3910  9.9080   2
  23  -2   0 -3.5622  8.5065   1
  23   2   0 -5.3085  8.9743   1
  24  -2   0 17.6670 13.4867   1
  24   2   0  8.4365 11.2599   1
  25  -2   0 -0.6520  9.3032   1
  25   2   0 -2.0718 11.2442   1
  26  -2   0 36.4163 14.5303   1
  26   2   0 15.4363 13.9385   1
   0  -3   0 -1.0950  2.5525   2
   0  -3   0 8.52428 3.85079   1
  -1  -3   0 21.2716  4.7409   1
  -1  -3   0 19.4608  4.1920   2
   2  -3   0 200.025  10.399   1
  -2  -3   0 138.079   9.095   1
  -2  -3   0 135.467   8.852   2
   2  -3   0 155.483   7.210   2
   3  -3   0 33.3474  5.2138   1
  -3  -3   0 19.3166  4.4588   1
  -3  -3   0 28.9111  5.0562   2
   3   3   0 32.0755  5.1322   1
  -4  -3   0 378.795  15.984   2
  -4  -3   0 320.233  14.949   1
   4  -3   0 332.722  14.788   1
  -4   3   0 329.724  10.850   2
   4   3   0 334.574  14.676   1
  -5  -3   0 241.584  13.189   2
   5  -3   0 253.411  12.837   1
  -5  -3   0 236.202  12.847   1
  -5   3   0 247.726   8.767   2
   5   3   0 241.676  12.265   1
  -6  -3   0 1020.31   33.45   2
   6  -3   0 971.212  31.638   1
  -6   3   0 1004.69   26.13   2
   6   3   0 952.597  31.056   1
   7  -3   0 831.460  29.007   1
  -7  -3   0 813.868  29.961   2
   7   3   0 860.532  28.802   1
  -7   3   0 823.927  23.041   2
  -7   3   0 831.490  31.023   3
   8  -3   0 1067.89   35.81   1
  -8  -3   0 1100.59   37.42   2
  -8   3   0 1057.45   37.61   3
   8   3   0 1105.49   35.49   1
  -8   3   0 1093.95   29.70   2
  -9  -3   0 414.766  20.982   2
   9  -3   0 432.998  20.382   1
  -9   3   0 411.215  21.021   3
   9   3   0 420.186  19.864   1
  -9   3   0 437.889  15.496   2
 -10  -3   0 347.263  19.307   2
  10  -3   0 336.779  18.470   1
 -10   3   0 334.428  19.354   3
  10   3   0 343.665  18.358   1
 -10   3   0 347.264  14.281   2
 -11  -3   0 184.472  16.923   2
  11  -3   0 172.456  15.900   1
 -11   3   0 183.411  10.818   2
  11   3   0 168.201  15.687   1
 -11   3   0 173.166  16.745   3
  12  -3   0 364.502  20.895   1
 -12  -3   0 388.745  21.650   2
 -12   3   0 328.875  20.188   3
 -12   3   0 342.267  15.793   2
  12   3   0 337.456  20.174   1
  13  -3   0 204.296  19.329   1
 -13  -3   0 222.193  17.006   2
 -13   3   0 227.225  13.194   2
 -13   3   0 188.980  18.675   3
  13   3   0 229.517  20.214   1
 -14  -3   0 257.632  19.479   2
  14  -3   0 243.369  18.549   1
 -14   3   0 258.988  18.486   3
  14   3   0 273.560  20.644   1
 -15  -3   0 196.471  20.834   2
  15  -3   0 154.381  18.306   1
  15   3   0 189.042  20.580   1
 -15   3   0 191.932  19.390   3
 -16  -3   0 178.254  20.583   2
  16  -3   0 187.768  20.910   1
  16   3   0 127.408  17.622   1
 -16   3   0 230.023  21.796   3
  17  -3   0 56.6677 12.5586   1
 -17  -3   0 83.4826 14.8770   2
 -17   3   0 80.6358 14.0022   3
  17   3   0 71.6586 14.5771   1
 -18  -3   0 5.21581 7.40549   2
  18  -3   0 17.9753  8.9277   1
  18   3   0 27.9901 11.0214   1
 -18   3   0 6.69951 7.70027   3
  19  -3   0 7.66393 9.09052   1
 -19  -3   0 9.88719 8.60160   2
  19   3   0 9.47017 8.66064   1
 -19   3   0 14.1903  9.5817   3
  20  -3   0 12.4604  8.4332   1
 -20  -3   0 4.09082 9.42101   2
  20   3   0  0.9597 10.5610   1
 -20   3   0 -10.543   8.097   3
 -21  -3   0 -13.740   8.395   2
  21  -3   0 3.58967 9.32103   1
  21   3   0 -7.1686  8.3180   1
 -21   3   0 1.14939 8.12865   3
 -22  -3   0 23.7305 12.3356   2
  22  -3   0 3.87733 7.99461   1
  22   3   0 -0.9317  9.6599   1
 -23  -3   0  9.0290 10.3520   2
  23  -3   0 -3.1009  7.9344   1
  23   3   0  7.6017 10.7739   1
  24  -3   0 2.20069 9.76507   1
 -24  -3   0  3.1700 11.4148   2
  24   3   0 -0.9418 10.1661   1
 -25  -3   0 -9.1143 11.2791   2
  25  -3   0 8.61624 9.67682   1
  25   3   0  4.0680 11.3848   1
  26  -3   0  2.3539 11.5053   1
  26   3   0  3.6882 11.9744   1
   0  -4   0 150.237  10.624   1
   0  -4   0 164.354   9.576   2
   1  -4   0 2309.02   62.48   1
   1  -4   0 2321.95   59.76   2
  -1  -4   0 2358.77   62.85   1
  -1  -4   0 2307.50   61.36   2
   2  -4   0 714.260  22.254   2
  -2  -4   0 717.175  24.885   2
  -2  -4   0 708.425  25.778   1
   2  -4   0 690.132  25.597   1
   3  -4   0 882.516  29.764   1
  -3  -4   0 896.223  30.101   1
   3  -4   0 878.190  25.579   2
  -3  -4   0 878.619  29.905   2
   4  -4   0 650.954  24.136   1
  -4  -4   0 601.505  23.850   2
  -4  -4   0 607.157  23.742   1
   4   4   0 639.259  24.127   1
  -4   4   0 626.143  19.126   2
   5  -4   0 1013.01   33.70   1
  -5  -4   0 1013.62   34.29   1
  -5  -4   0 1025.38   34.74   2
   5   4   0 995.077  33.344   1
  -5   4   0 1042.75   27.72   2
  -6  -4   0 293.660  16.574   2
  -6  -4   0 296.153  16.234   1
   6  -4   0 300.037  15.783   1
  -6   4   0 294.490  10.817   2
   6   4   0 296.249  15.327   1
  -7  -4   0 102.353  11.842   2
   7  -4   0 111.552  11.656   1
  -7   4   0 125.332   6.696   2
   7   4   0 119.919  11.680   1
  -7   4   0 90.1627 12.0908   3
   8  -4   0 85.8640 10.5478   1
  -8  -4   0 76.5283 10.7634   2
   8   4   0 102.525  10.964   1
  -8   4   0 92.5075  6.0618   2
  -8   4   0 95.1890 12.1408   3
  -9  -4   0 136.159  14.680   2
   9  -4   0 154.270  14.688   1
   9   4   0 125.404  13.272   1
  -9   4   0 169.528  17.026   3
  -9   4   0 149.431   8.190   2
  10  -4   0 59.9337 10.1385   1
 -10  -4   0 81.8251 12.0281   2
  10   4   0 77.1038 10.8881   1
 -10   4   0 106.319  14.153   3
 -10   4   0 97.1288  8.0508   2
 -11  -4   0 6.63500 5.43720   2
  11  -4   0 8.41661 5.70865   1
  11   4   0 4.00245 4.83547   1
 -11   4   0 -4.6259  4.4310   3
 -12  -4   0 9.98155 6.16740   2
  12  -4   0 4.27254 4.96015   1
  12   4   0 8.31901 5.53593   1
 -12   4   0 7.87016 5.91949   3
  13  -4   0 25.1699  8.2284   1
 -13  -4   0 4.93498 6.06960   2
  13   4   0 11.5996  6.4134   1
 -13   4   0 11.3969  7.0431   3
 -14  -4   0 4.99552 7.22286   2
  14  -4   0 1.72746 6.49640   1
 -14   4   0 1.39789 6.68542   3
  14   4   0 7.39190 7.17812   1
  15  -4   0 17.6017  8.1004   1
 -15  -4   0 9.38067 7.96942   2
 -15   4   0 18.7323  8.5718   3
  15   4   0 13.0364  8.2350   1
 -16  -4   0 -1.9060  6.3253   2
  16  -4   0 3.10182 7.79234   1
 -16   4   0 26.1434 10.0870   3
  16   4   0 5.67105 8.42298   1
  17  -4   0 48.5069 11.6919   1
 -17  -4   0 56.4396 13.2151   2
 -17   4   0 34.8544 10.6878   3
  17   4   0 16.5040  9.9011   1
  18  -4   0 51.1785 12.8329   1
 -18  -4   0 27.0351 10.7043   2
  18   4   0 49.7714 13.6612   1
 -18   4   0 56.0273 13.5688   3
 -19  -4   0 34.1598 13.2277   2
  19  -4   0 45.3864 12.0580   1
 -19   4   0 40.7935 13.0362   3
  19   4   0 35.9530 12.9357   1
 -20  -4   0 48.2608 12.3240   2
  20  -4   0 13.8683 10.5704   1
  20   4   0  7.7973 11.5227   1
 -20   4   0  2.1689 10.1562   3
  21  -4   0 40.2033 14.7499   1
 -21  -4   0 2.63912 8.71195   2
 -21   4   0 21.6016 12.3639   3
  21   4   0 6.39783 9.80436   1
 -22  -4   0 -4.0808  8.2107   2
  22  -4   0 5.18665 9.15558   1
 -22   4   0 24.6091 11.6918   3
  22   4   0 11.1747 10.4712   1
  23  -4   0  5.6207 12.3583   1
 -23  -4   0 11.8639 13.2333   2
  23   4   0 14.0260 14.2250   1
 -24  -4   0  2.6475 12.3118   2
  24  -4   0 10.7110 11.0093   1
  24   4   0 19.1196 14.4397   1
  25  -4   0 2.89709 9.65502   1
 -25  -4   0 20.1462 14.7324   2
  25   4   0  7.7106 14.7084   1
   0  -5   0 8.18178 4.73799   1
   0  -5   0 -1.7558  2.7718   2
  -1  -5   0 46.7647  6.8976   2
   1  -5   0 49.0763  6.8688   2
  -1  -5   0 34.7384  7.5840   1
   1  -5   0 44.6536  7.8244   1
  -2  -5   0 45.2449  7.9763   1
  -2  -5   0 47.7961  7.5968   2
   2  -5   0 49.7749  6.4709   2
   2  -5   0 55.6915  8.6349   1
  -3  -5   0 63.6543  8.8264   2
   3  -5   0 67.7632  7.0104   2
  -3  -5   0 64.1206  9.3136   1
   3  -5   0 55.2273  8.5520   1
  -4  -5   0 35.1300  7.2058   2
   4  -5   0 45.6419  7.7765   1
  -4  -5   0 29.3892  6.5443   1
   4   5   0 55.4829  8.4668   1
   5  -5   0 311.542  17.623   1
  -5  -5   0 330.889  18.191   2
  -5  -5   0 310.760  17.682   1
   5   5   0 357.565  18.287   1
  -5   5   0 338.405  12.926   2
   6  -5   0 90.6285 11.0094   1
  -6  -5   0 80.5442 11.2221   2
  -6  -5   0 81.3702 11.0511   1
  -6   5   0 79.5643  5.8137   2
  -6   5   0 76.6757 11.5900   3
   6   5   0 76.1463 10.3001   1
  -7  -5   0 337.350  19.267   2
   7  -5   0 308.582  18.007   1
  -7  -5   0 347.976  19.429   1
   7   5   0 323.893  17.829   1
  -7   5   0 334.458  12.616   2
  -7   5   0 305.382  19.540   3
   7   5   0 355.446  12.143   3
  -8  -5   0 50.1143  9.5526   2
   8  -5   0 74.6161 10.3124   1
   8   5   0 96.9219 11.5168   1
  -8   5   0 76.2386  6.7233   2
  -8   5   0 76.6923 11.7734   3
   9  -5   0 342.651  19.673   1
  -9  -5   0 364.073  21.468   2
   9   5   0 365.295  19.738   1
  -9   5   0 341.306  21.690   3
 -10  -5   0 158.632  17.172   2
  10  -5   0 154.466  16.142   1
  10   5   0 167.898  16.340   1
 -10   5   0 198.272  19.489   3
  11  -5   0 210.223  15.851   1
 -11  -5   0 162.388  17.928   2
  11   5   0 181.530  17.324   1
 -11   5   0 205.356  21.089   3
 -12  -5   0 -3.1794  4.8023   2
  12  -5   0 11.9870  6.8736   1
 -12   5   0 -2.2316  5.7538   3
  12   5   0 10.5667  7.0799   1
 -13  -5   0 232.335  22.578   2
  13  -5   0 214.417  20.487   1
 -13   5   0 214.765  21.978   3
  13   5   0 248.407  18.633   1
  14  -5   0 5.80544 6.26484   1
 -14  -5   0 9.87290 8.62254   2
  14   5   0 -6.0764  6.9398   1
 -14   5   0 14.9157  8.4159   3
 -15  -5   0 66.3088 13.2220   2
  15  -5   0 52.6297 12.0157   1
  15   5   0 62.1400 13.8847   1
 -15   5   0 67.5340 13.5495   3
 -16  -5   0 -2.2107  6.3055   2
  16  -5   0 13.7130  7.6436   1
  16   5   0 7.04678 7.91707   1
 -16   5   0 -1.8759  7.1133   3
 -17  -5   0 21.4491 10.2384   2
  17  -5   0 24.5116 10.2381   1
 -17   5   0 12.4310  9.2193   3
  17   5   0 31.3206 11.2849   1
  18  -5   0 4.91215 6.99773   1
 -18  -5   0 2.63110 7.96966   2
 -18   5   0 -1.9140  9.3154   3
  18   5   0 1.25831 8.67178   1
 -19  -5   0 -4.2374  8.4377   2
  19  -5   0 18.4950 10.1260   1
  19   5   0 10.4784 10.1278   1
 -19   5   0  5.8586 11.3406   3
 -20  -5   0 -8.8366  6.8434   2
  20  -5   0 1.14961 7.09749   1
 -20   5   0 -8.4741 10.7682   3
  20   5   0 7.79372 9.85598   1
  21  -5   0 -2.3235  8.6403   1
 -21  -5   0 25.5078 13.2559   2
  21   5   0 -1.0925 10.1985   1
 -21   5   0  5.6863 12.1574   3
  22  -5   0  4.4592 10.7038   1
 -22  -5   0  1.9746 10.6969   2
 -22   5   0 -6.3994 11.2613   3
  22   5   0 -9.8855 12.0614   1
  23  -5   0  7.6730 11.6318   1
 -23  -5   0 -6.3355 12.0683   2
  23   5   0  7.4712 11.5949   1
 -23   5   0 -6.6918  9.6996   3
 -24  -5   0  0.4568 10.7574   2
  24  -5   0 -10.074   8.023   1
 -24   5   0 -14.441  10.048   3
  24   5   0 -7.0542 12.2190   1
   0  -6   0 15.5993  5.4833   2
   0  -6   0 4.75424 5.44131   1
   1  -6   0 750.282  29.693   1
  -1  -6   0 668.626  28.634   1
   1  -6   0 657.969  24.886   2
  -1  -6   0 613.479  25.576   2
   2  -6   0 23.1317  7.3291   1
   2  -6   0 13.8792  4.7825   2
  -2  -6   0 -3.6400  2.7940   2
  -2  -6   0 8.21962 5.48014   1
   3  -6   0 578.975  21.364   2
  -3  -6   0 568.299  25.760   1
  -3  -6   0 566.982  24.948   2
   3  -6   0 543.560  25.874   1
  -4  -6   0 34.0496  7.6543   1
  -4  -6   0 47.0070  8.7768   2
   4  -6   0 28.3890  8.0615   1
   4  -6   0 29.7972  5.5556   2
   4   6   0 23.1623  6.8572   1
   5  -6   0 221.879  16.158   1
  -5  -6   0 215.031  15.668   2
  -5  -6   0 200.417  15.119   1
  -5   6   0 220.679  19.844   3
   5   6   0 211.179  11.527   3
   5   6   0 228.372  15.636   1
  -5   6   0 210.971  10.741   2
  -6  -6   0 10.4706  5.9062   2
   6  -6   0 9.81049 5.08873   1
  -6  -6   0 20.5021  7.0235   1
  -6   6   0 16.1336  6.4891   3
  -6   6   0 15.3118  3.8375   2
   6   6   0 3.42870 4.56714   1
  -7  -6   0 152.010  16.336   2
   7  -6   0 158.348  16.129   1
  -7  -6   0 152.645  16.502   1
  -7   6   0 119.733  15.713   3
   7   6   0 152.143  15.382   1
  -8  -6   0 12.5070  7.0184   1
  -8  -6   0 38.6349  9.3253   2
   8  -6   0 16.8479  7.4371   1
  -8   6   0 19.9405  8.4489   3
   8   6   0 28.3887  7.6524   1
   9  -6   0 51.9116 10.4727   1
  -9  -6   0 56.2013 11.0109   2
  -9   6   0 29.8756 10.4301   3
   9   6   0 67.1820 10.8332   1
 -10  -6   0 5.92487 6.30565   2
  10  -6   0 -1.7060  4.7110   1
 -10   6   0 6.22512 6.88993   3
  10   6   0 -6.8622  4.2057   1
 -11  -6   0 1.33314 5.84781   2
  11  -6   0 12.3423  6.3656   1
  11   6   0 -2.2579  5.3999   1
 -11   6   0 1.45057 6.77405   3
  12  -6   0 -7.6488  5.4092   1
 -12  -6   0 10.6463  7.3079   2
 -12   6   0 -6.6340  6.4354   3
  12   6   0 5.25256 5.98076   1
 -13  -6   0 29.0300  9.7532   2
  13  -6   0 10.2543  7.2279   1
  13   6   0 19.3001  8.7046   1
 -13   6   0 17.0986 10.1050   3
 -14  -6   0 7.62613 8.51072   2
  14  -6   0 5.56120 6.62188   1
  14   6   0 -2.7485  6.4778   1
 -14   6   0 6.01562 7.67752   3
  15  -6   0 28.3768  9.4580   1
 -15  -6   0 14.6683 10.6350   2
 -15   6   0 37.5302 12.3719   3
  15   6   0 18.1036  9.1588   1
 -16  -6   0 17.5920  9.9457   2
  16  -6   0 2.73234 7.72059   1
 -16   6   0 0.25652 7.19154   3
  16   6   0 5.76351 8.13911   1
  17  -6   0 45.9474 12.4173   1
 -17  -6   0 41.3208 12.9518   2
  17   6   0 24.9772 11.0012   1
 -17   6   0 73.3201 16.5514   3
 -18  -6   0 0.26283 8.21847   2
  18  -6   0 6.92591 6.63991   1
  18   6   0 26.7358 12.4946   1
 -18   6   0 3.35566 8.45164   3
 -19  -6   0 55.7226 17.4490   2
  19  -6   0 34.1466 11.1283   1
 -19   6   0 43.9372 14.6564   3
  19   6   0 17.8653 11.6990   1
  20  -6   0 12.4556  9.3113   1
 -20  -6   0 13.3601 12.2703   2
 -20   6   0 -3.2676  8.9143   3
  20   6   0 0.49749 9.90052   1
 -21  -6   0 44.2190 16.2917   2
  21  -6   0 11.0605 11.2207   1
  21   6   0 22.4919 13.5502   1
 -21   6   0 30.5857 15.8328   3
  22  -6   0 7.37494 9.65670   1
 -22  -6   0  6.5914 11.2863   2
 -22   6   0 -15.266  12.416   3
  22   6   0 -7.6437 10.2281   1
  23  -6   0 15.0333 10.9956   1
 -23  -6   0 23.9904 13.8709   2
 -23   6   0  4.9217 14.6848   3
  23   6   0  1.2900 13.2394   1
   0  -7   0 -3.4823  5.0978   1
   0  -7   0 -0.6231  3.5438   2
   0   7   0 -0.0156  5.3132   3
   1  -7   0 36.5872  9.0531   1
   1  -7   0 51.7380  8.6002   2
  -1  -7   0 33.9251  8.6555   1
  -1  -7   0 49.3277  8.7866   2
  -1   7   0 44.4476  9.4024   3
   1   7   0 50.2544  9.0772   3
   2  -7   0 3.72676 5.60050   1
   2  -7   0 4.75973 4.64486   2
  -2  -7   0 -2.2451  4.2404   2
  -2  -7   0 5.20917 5.34509   1
  -2   7   0 1.01591 4.38441   3
   2   7   0 -5.2711  3.3690   3
  -3  -7   0 105.155  13.939   1
   3  -7   0 100.392  13.788   1
  -3  -7   0 98.8879 12.4079   2
   3  -7   0 93.9210 10.3672   2
  -3   7   0 87.6625 13.0298   3
   3   7   0 122.957  12.311   3
  -4  -7   0 -2.6726  4.6733   2
  -4  -7   0 0.41124 4.76767   1
   4  -7   0 -2.9897  4.9342   1
   4   7   0 -3.3948  4.0354   1
   4   7   0 4.69165 4.46268   3
  -4   7   0 3.86722 5.35652   3
   5  -7   0 235.932  21.009   1
  -5  -7   0 240.164  17.827   1
  -5  -7   0 229.859  20.218   2
  -5   7   0 210.885  20.686   3
   5   7   0 186.190  18.886   1
  -6  -7   0 2.81954 5.32379   1
   6  -7   0 4.37512 6.34124   1
  -6  -7   0 2.56445 4.77230   2
   6   7   0 -1.6991  4.7491   1
  -6   7   0 -0.7001  5.0391   3
  -7  -7   0 262.220  19.352   1
   7  -7   0 239.306  21.377   1
  -7  -7   0 212.765  20.437   2
   7   7   0 251.194  17.860   1
  -7   7   0 247.418  23.831   3
   8  -7   0 9.69411 6.65167   1
  -8  -7   0 0.58949 5.88175   2
  -8  -7   0 -0.1715  5.7370   1
  -8   7   0 -2.6068  5.7222   3
   8   7   0 0.91721 5.38421   1
   9  -7   0 181.088  19.532   1
  -9  -7   0 212.275  21.653   2
  -9   7   0 203.534  22.124   3
   9   7   0 244.805  21.650   1
 -10  -7   0 9.81650 8.80097   2
  10  -7   0 -2.1367  5.3995   1
 -10   7   0 8.63144 7.99151   3
  10   7   0 4.28641 6.50226   1
 -11  -7   0 390.689  26.164   2
  11  -7   0 393.952  25.003   1
 -11   7   0 361.646  26.521   3
  11   7   0 428.070  25.266   1
 -12  -7   0 -3.0874  5.9858   2
  12  -7   0 -1.9710  5.6276   1
  12   7   0 -6.1350  6.2419   1
 -12   7   0 3.05749 8.12415   3
  13  -7   0 135.632  18.782   1
 -13  -7   0 141.408  19.440   2
 -13   7   0 136.686  20.243   3
  13   7   0 154.945  18.399   1
  14  -7   0 -0.8669  5.7430   1
 -14  -7   0 -2.3964  6.4703   2
 -14   7   0 4.46665 8.17731   3
  14   7   0 0.79339 8.27082   1
  15  -7   0 39.8843 12.2328   1
 -15  -7   0 51.7552 13.4256   2
  15   7   0 22.7690 10.9144   1
 -15   7   0 23.2779 12.4321   3
 -16  -7   0 0.53527 8.08081   2
  16  -7   0 0.27302 6.47236   1
  16   7   0 11.5218  9.9556   1
 -16   7   0 -0.6872  8.8182   3
  17  -7   0 11.8591  9.2754   1
 -17  -7   0  7.0985 11.9286   2
 -17   7   0 3.37948 9.54563   3
  17   7   0 2.42476 8.33097   1
  18  -7   0 -1.6570  8.3111   1
 -18  -7   0  7.4312 10.2083   2
 -18   7   0 6.67427 9.95685   3
  18   7   0 2.34146 9.37760   1
 -19  -7   0 17.9513 13.8544   2
  19  -7   0 14.6659 10.2273   1
 -19   7   0  4.5717 12.1422   3
  19   7   0 12.3489 10.2526   1
  20  -7   0 -2.7081  8.6206   1
 -20  -7   0 -6.8472  9.0456   2
  20   7   0 -5.8267 11.2257   1
 -20   7   0  2.1341 10.7011   3
  21  -7   0 10.1842 10.3576   1
 -21  -7   0 10.8358 12.1993   2
 -21   7   0 -2.0007 11.6128   3
  21   7   0  2.5035 14.1272   1
 -22  -7   0 14.6549 13.1758   2
  22  -7   0 -4.5706 10.6175   1
 -22   7   0 -16.027  12.965   3
  22   7   0 -17.044  12.213   1
   0  -8   0 15.1730  7.6051   1
   0  -8   0 10.2888  5.6992   2
   0   8   0 18.1796  7.6937   3
  -1  -8   0 205.614  20.647   1
   1  -8   0 186.402  16.355   2
  -1  -8   0 206.706  18.397   2
   1  -8   0 158.841  18.053   1
   1   8   0 212.700  18.876   3
  -1   8   0 210.801  19.395   3
   2  -8   0 29.6791  7.3245   2
   2  -8   0 30.7431  8.9865   1
  -2  -8   0 29.4507  8.8602   1
  -2  -8   0 38.4496  9.0280   2
   2   8   0 36.2797  8.6856   3
  -2   8   0 46.4621 10.5841   3
  -3  -8   0 189.873  19.347   1
   3  -8   0 187.987  19.844   1
  -3  -8   0 220.015  16.527   2
  -3   8   0 206.139  20.249   3
   4  -8   0 15.9754  8.3140   1
  -4  -8   0 21.5721  7.6568   1
  -4  -8   0 28.2500  8.4948   2
  -4   8   0 9.68165 7.73001   3
   4   8   0 -7.0858  4.4313   1
  -5  -8   0 126.613  16.144   1
  -5  -8   0 128.049  16.184   2
   5  -8   0 158.244  18.552   1
  -5   8   0 151.626  18.501   3
   5   8   0 135.382  16.559   1
  -6  -8   0 -5.7296  5.8195   2
   6  -8   0 -3.4081  5.8356   1
  -6  -8   0 -0.6254  6.5906   1
   6   8   0 2.70979 7.03535   1
  -6   8   0 -0.9582  6.2825   3
  -7  -8   0 130.555  17.128   2
  -7  -8   0 109.261  16.635   1
   7  -8   0 124.703  16.947   1
   7   8   0 131.737  16.597   1
  -7   8   0 140.009  18.740   3
  -8  -8   0 -4.3414  7.1704   2
  -8  -8   0 7.71848 8.77217   1
   8  -8   0 0.07948 6.53608   1
   8   8   0 9.33190 7.00545   1
  -8   8   0 2.23385 7.54298   3
  -9  -8   0 30.7545 10.9131   1
   9  -8   0 24.7445  9.2943   1
  -9  -8   0 47.5325 12.7697   2
   9   8   0 25.5107  9.2362   1
  -9   8   0 33.4591 11.0880   3
  10  -8   0 4.98517 6.74962   1
 -10  -8   0 -1.3326  7.0542   2
  10   8   0 13.3673  8.1927   1
 -10   8   0 5.44222 7.91601   3
 -11  -8   0 0.64744 8.13196   2
  11  -8   0 5.09507 7.32600   1
  11   8   0 8.42757 7.46741   1
 -11   8   0 4.88220 7.65932   3
 -12  -8   0 -1.5562  6.5643   2
  12  -8   0 -1.4977  6.2042   1
 -12   8   0 5.56524 9.88728   3
  12   8   0 0.53357 6.55980   1
  13  -8   0 3.95913 7.90901   1
 -13  -8   0 12.1755 10.6786   2
  13   8   0 -1.9838  6.1792   1
 -13   8   0 12.5065 10.4562   3
  14  -8   0 2.41033 8.03050   1
 -14  -8   0 -4.6007  7.9175   2
 -14   8   0 4.09433 9.74588   3
  14   8   0 0.83017 7.60236   1
 -15  -8   0 11.4143  9.7809   2
  15  -8   0 -2.8548  8.3047   1
  15   8   0 2.80656 7.80848   1
 -15   8   0 27.0169 13.4458   3
 -16  -8   0  4.1128 10.9195   2
  16  -8   0 6.39416 8.67986   1
 -16   8   0  0.1993 11.1496   3
  16   8   0 3.60487 8.19971   1
  17  -8   0 10.4044  9.8133   1
 -17  -8   0 22.4709 13.8982   2
 -17   8   0 22.9702 11.9453   3
  17   8   0 12.4625 12.6947   1
 -18  -8   0  7.1095 11.3176   2
  18  -8   0 1.87705 7.68146   1
  18   8   0  7.9347 10.0416   1
 -18   8   0  1.0433 10.2081   3
 -19  -8   0 21.6838 13.8801   2
  19  -8   0 35.1030 14.6351   1
 -19   8   0  7.3468 13.3376   3
  19   8   0  2.7990 12.2628   1
  20  -8   0 -0.1779 10.3291   1
 -20  -8   0 10.2636 11.9477   2
 -20   8   0 -5.2979 10.6583   3
  20   8   0 -13.257   9.181   1
 -21  -8   0 -1.3503 12.7850   2
  21  -8   0 16.0464 10.5104   1
 -21   8   0 -0.4993 14.4903   3
  21   8   0 -2.1620 12.9924   1
   0  -9   0 -0.7906  4.9360   2
   0  -9   0 -0.7114  6.1579   1
   0   9   0 -0.1845  6.1079   3
   1  -9   0 -2.3855  5.9193   1
  -1  -9   0 1.36851 6.17379   2
  -1  -9   0 7.89021 8.06157   1
   1   9   0 12.0676  7.1975   3
  -1   9   0 7.23538 5.85415   3
  -2  -9   0 -0.2238  6.0058   1
  -2  -9   0 13.4895  7.5986   2
   2  -9   0 7.82397 7.80241   1
  -2   9   0 6.31164 7.28621   3
  -3  -9   0 7.36592 7.95289   1
   3  -9   0 10.6976  8.8228   1
  -3  -9   0 16.3200  8.6158   2
  -3   9   0 1.11324 7.18555   3
  -4  -9   0 17.3648  7.9098   2
   4  -9   0 20.5763  9.9466   1
  -4  -9   0 31.4443 10.0414   1
  -4   9   0 10.9130  9.0364   3
   4   9   0 53.0868 12.8935   1
   5  -9   0 49.7721 12.3963   1
  -5  -9   0 51.8189 11.5955   2
  -5  -9   0 45.4515 11.7430   1
   5   9   0 53.3338 11.7668   1
  -5   9   0 64.9645 13.1215   3
   6  -9   0 46.6329 12.7340   1
  -6  -9   0 21.8941  8.8934   1
  -6  -9   0 42.6790 10.8523   2
   6   9   0 19.5288  8.5856   1
  -6   9   0 41.0492 11.2740   3
   7  -9   0 117.190  17.761   1
  -7  -9   0 74.1636 15.1052   1
  -7  -9   0 56.4246 12.7354   2
  -7   9   0 134.515  20.580   3
   7   9   0 89.4534 15.3757   1
  -8  -9   0 19.6072  9.1564   2
  -8  -9   0 18.3266  8.9215   1
   8  -9   0 18.8069  9.4899   1
  -8   9   0 49.0349 12.7325   3
   8   9   0 40.7190 11.2392   1
  -9  -9   0 53.8050 13.5589   1
  -9  -9   0 62.3329 13.7387   2
   9  -9   0 64.8110 14.4630   1
   9   9   0 23.4641 10.2914   1
  -9   9   0 56.5658 14.0125   3
  10  -9   0 5.01943 7.45129   1
 -10  -9   0 21.5337  9.8688   2
 -10   9   0 28.2968 11.6655   3
  10   9   0 9.37358 7.71165   1
 -11  -9   0 31.9696 12.0907   2
  11  -9   0 37.1428 12.1272   1
  11   9   0 38.8719 12.3205   1
 -11   9   0 47.4425 14.1400   3
 -12  -9   0 8.23770 9.91618   2
  12  -9   0 16.0630 10.4671   1
  12   9   0 -0.9816  7.8760   1
 -12   9   0 21.9127 11.8892   3
 -13  -9   0 23.1347 12.8223   2
  13  -9   0 23.7844 10.4141   1
 -13   9   0 30.3255 13.2218   3
  13   9   0 24.9509 11.1450   1
 -14  -9   0 2.64611 8.87015   2
  14  -9   0 6.38903 8.88371   1
 -14   9   0 -0.5411  8.6732   3
  14   9   0 3.66508 8.94461   1
  15  -9   0 10.7383  9.3089   1
 -15  -9   0 11.6390 11.3795   2
 -15   9   0 1.34332 9.42676   3
  15   9   0  9.4542 10.7061   1
 -16  -9   0 -0.3634  9.8677   2
  16  -9   0 -8.7996  8.7055   1
 -16   9   0 -1.3944  9.8788   3
  16   9   0 -12.228   9.244   1
  17  -9   0 19.9784 12.2501   1
 -17  -9   0  5.0094 10.3224   2
 -17   9   0 21.1552 13.4778   3
  17   9   0 -7.5926  8.4261   1
 -18  -9   0  0.7475 10.4323   2
  18  -9   0  7.5977 11.8453   1
 -18   9   0  7.9492 13.0382   3
  18   9   0 -1.6323 12.3256   1
  19  -9   0 14.2530 11.0708   1
 -19  -9   0 10.8607 12.5616   2
  19   9   0 -2.7459  9.3400   1
 -19   9   0 -16.499  10.719   3
   0 -10   0 26.5280  9.3931   1
   1 -10   0 -4.1016  7.8972   1
  -1 -10   0 29.6255 10.4256   1
  -1  10   0 27.3396 10.5989   3
  -2 -10   0 36.8172 11.6732   1
   2 -10   0 29.3870 11.0654   1
  -2  10   0 40.2622 11.6809   3
   3 -10   0 54.4713 14.2131   1
  -3 -10   0 36.9699 12.1882   1
  -3 -10   0 44.1285 11.3580   2
  -3  10   0 37.2487 11.6669   3
   3  10   0 35.3676 12.4906   1
  -4 -10   0 23.9532  9.8717   1
   4 -10   0 26.7444 10.7319   1
  -4 -10   0 35.3597 11.0091   2
   4  10   0 22.6609  9.6322   1
  -4  10   0 30.1974 11.5940   3
   5 -10   0 45.7962 12.1675   1
  -5 -10   0 40.6648 12.0475   2
  -5 -10   0 57.0931 13.3303   1
  -5  10   0 35.7122 11.6983   3
   5  10   0 39.6104 11.6117   1
  -6 -10   0 26.6549 11.1416   1
  -6 -10   0 9.72171 9.19390   2
   6 -10   0 15.1405  9.0824   1
   6  10   0 27.6199 11.4615   1
  -6  10   0 27.1297 11.8013   3
   7 -10   0 1.82895 7.44429   1
  -7 -10   0 18.6046 10.0298   2
  -7 -10   0 8.61386 8.80217   1
   7  10   0 6.09061 7.73147   1
  -7  10   0 20.9388 11.0726   3
  -8 -10   0 10.6056  8.2561   2
  -8 -10   0 -2.5758  8.4193   1
   8 -10   0 7.39745 9.43913   1
   8  10   0 -4.4669  7.9557   1
  -8  10   0 -3.9240  7.6370   3
  -9 -10   0 -0.8538  7.9358   1
  -9 -10   0 -2.5618  6.8494   2
   9 -10   0 1.44079 8.62679   1
   9  10   0 0.06179 6.02069   1
  -9  10   0 8.71051 9.96380   3
 -10 -10   0 0.29365 7.29924   2
  10 -10   0 4.21117 8.38880   1
 -10  10   0 3.75860 9.78782   3
  10  10   0 0.41409 6.63688   1
  11 -10   0 19.1877 10.7312   1
 -11 -10   0 -0.9233  9.2548   2
 -11  10   0  6.0591 11.9205   3
  11  10   0 3.97214 8.23955   1
 -12 -10   0 -5.4663  9.5914   2
  12 -10   0  9.2849 10.0288   1
 -12  10   0 -5.2462  8.7694   3
  12  10   0 15.7117  9.7275   1
  13 -10   0  1.5336 11.1932   1
 -13 -10   0 7.62918 9.86929   2
  13  10   0 -7.4116  6.8094   1
 -13  10   0  4.7446 12.7380   3
  14 -10   0 -1.7398 10.6750   1
 -14 -10   0  0.1532 11.0438   2
  14  10   0 7.41926 9.59995   1
 -14  10   0  1.7871 10.2999   3
  15 -10   0 -4.5999  9.0631   1
 -15 -10   0 -7.3366  8.2949   2
 -15  10   0 -4.6515  9.1209   3
  15  10   0  2.6916 12.4790   1
  16 -10   0 11.4732 12.0386   1
 -16 -10   0  7.9400 13.6330   2
 -16  10   0 -17.890  13.203   3
  16  10   0 3.95473 9.19176   1
 -17  10   0 -2.2434 15.6889   3
   0 -11   0 -12.884   7.015   1
   1 -11   0 6.52617 7.88914   1
  -1 -11   0 -9.1620  6.9743   1
  -2 -11   0 6.86369 9.32571   1
   2 -11   0 12.1514  9.4879   1
   2  11   0 15.0140  9.3664   1
   3 -11   0 3.04548 8.73237   1
  -3 -11   0 2.20700 8.06666   1
   3  11   0 9.25659 8.97394   1
  -3  11   0 2.79608 8.07578   3
   4 -11   0  8.1086 10.7573   1
  -4 -11   0 15.9558 10.0587   1
   4  11   0 12.5127  9.3750   1
  -4  11   0 -0.4445  8.4489   3
   5 -11   0 13.6475 10.0010   1
  -5 -11   0 5.68006 9.87610   1
  -5 -11   0 5.96743 9.19934   2
  -5  11   0 7.25077 8.73001   3
   5  11   0 -0.9297 10.0449   1
  -6 -11   0 16.0687 11.2176   1
   6 -11   0 22.3014 11.3831   1
  -6 -11   0 19.2593 10.7797   2
   6  11   0 15.2628 10.7872   1
  -6  11   0 11.0838 10.4547   3
  -7 -11   0 9.26667 9.40036   1
   7 -11   0  5.0373 10.4918   1
  -7 -11   0 -2.6661  9.4286   2
  -7  11   0 10.5250 10.3437   3
   7  11   0 25.0674 11.0670   1
   8 -11   0 10.6772 11.9481   1
  -8 -11   0 24.6651 12.3524   2
  -8 -11   0 27.3396 12.1436   1
   8  11   0 29.5759 11.3102   1
  -8  11   0 44.6926 15.5978   3
  -9 -11   0 10.9791  9.1081   2
  -9 -11   0 6.17952 9.60390   1
   9 -11   0 -4.4434  9.3647   1
   9  11   0 19.2410  9.9349   1
  -9  11   0 11.4888 12.1033   3
 -10 -11   0  3.1688 10.3635   2
  10 -11   0 34.8642 12.9564   1
 -10  11   0 -3.6136 11.3476   3
  10  11   0  9.4401 10.4254   1
 -11 -11   0 -4.2878 10.4397   2
  11 -11   0  3.0043 10.8907   1
 -11  11   0 10.9438 11.6594   3
  11  11   0  6.5679 10.6819   1
 -12 -11   0  5.9865 12.2731   2
  12 -11   0 19.8278 12.4480   1
  12  11   0 14.7316 10.8806   1
 -12  11   0 50.4390 16.0270   3
 -13 -11   0  8.6409 10.3105   2
  13  11   0 -5.2912  8.1842   1
 -13  11   0 31.4213 13.1797   3
 -14  11   0 -2.0412 14.9696   3
   0 -12   0 20.4235 13.5229   1
  -1 -12   0 -8.3208  9.3574   1
   1 -12   0 6.55640 9.84059   1
  -2 -12   0 12.7486 10.2066   1
   2 -12   0 25.9154 13.6311   1
   2  12   0 17.8257 11.4438   1
   3 -12   0 12.3789 11.6422   1
  -3 -12   0 -3.9123  8.1252   1
   3  12   0  7.8329 10.9970   1
   4 -12   0 29.6277 14.8968   1
  -4 -12   0 5.28206 9.97511   1
   4  12   0  0.5101 11.5801   1
  -5 -12   0  8.6352 11.0110   1
   5 -12   0 -0.7896  9.9177   1
   5  12   0 -0.5723 10.4445   1
   6 -12   0 2.40421 9.24759   1
  -6 -12   0 24.2950 13.7008   1
  -6  12   0 10.8318 11.5018   3
   6  12   0 11.8975 12.3808   1
  -7 -12   0 -8.7910  8.1755   1
   7 -12   0 -0.8999  9.0326   1
  -7  12   0 1.34952 9.63953   3
   7  12   0 -3.8413  7.6228   1
  -8 -12   0 2.18210 9.26700   1
  -8 -12   0  7.3888 11.6071   2
  -8  12   0  3.1037 12.0804   3
   8  12   0 -1.0547  8.8219   1
  -9 -12   0  2.5966 11.4852   2
  -9  12   0 17.5328 13.0969   3
   9  12   0  9.0257 10.3374   1
  27   0  -1 11.3198 15.2909   1
  26   0  -1 -4.4259  9.4061   1
  25   0  -1 0.89882 9.95637   1
  24   0  -1  1.6726 11.1337   1
  23   0  -1 -5.9949  8.6701   1
  22   0  -1 -4.7742  8.3924   1
  21   0  -1 10.0938 10.1322   1
  20   0  -1 2.14247 7.72918   1
 -20   0   1 8.13057 7.44721   2
 -19   0   1 47.6414 11.9530   2
  19   0  -1 43.7002 12.3157   1
  18   0  -1 -1.0741  6.6713   1
 -18   0   1 -4.4447  4.9775   2
 -17   0   1 -12.942   4.871   2
  17   0  -1 6.62908 7.52775   1
 -16   0   1 -8.6852  4.4640   3
 -16   0   1 6.90184 6.60925   2
  16   0  -1 -2.9767  6.1300   1
 -15   0   1 285.939  16.526   3
 -15   0   1 287.632  18.335   2
  15   0  -1 270.371  20.437   1
 -14   0   1 2.10135 4.76542   2
  14   0  -1 10.1437  7.3778   1
 -14   0   1 -2.4826  4.2311   3
  13   0  -1 436.505  24.321   1
 -13   0   1 461.912  19.628   3
 -13   0   1 432.117  21.218   2
  12   0  -1 1.62773 5.01817   1
 -12   0   1 2.04674 4.02806   3
 -12   0   1 3.67734 5.08796   2
 -11   0   1 2003.17   58.60   2
  11   0  -1 2187.33   62.94   1
 -11   0   1 2027.44   56.26   3
  10   0  -1 -3.2476  3.9186   1
 -10   0   1 -0.6015  3.2238   3
 -10   0   1 -1.8172  4.1195   2
  -9   0   1 1680.73   45.89   3
   9   0  -1 1678.66   50.28   1
  -9   0   1 1667.94   47.78   2
  -8   0   1 -0.9389  2.4020   3
  -8   0   1 -2.1040  3.2894   2
   8   0  -1 0.32410 2.97695   1
   7   0  -1 128.300   9.345   1
  -7   0   1 129.067   8.586   2
  -6   0   1 -0.0375  3.0653   2
   6   0  -1 10.7320  3.5989   1
  -5   0   1 825.412  24.225   2
   5   0  -1 814.006  24.991   1
   4   0  -1 0.48502 2.17391   1
  -4   0   1 -1.8585  2.3835   2
   3   0  -1 1250.83   32.35   1
  -3   0   1 1312.19   32.52   2
   2   0   1 -9.6040  1.2242   1
  -3   0  -1 1.05014 1.36795   2
  -3   0  -1 2.11624 1.75313   3
   3   0   1 0.83831 1.88565   1
   4   0   1 1.19823 2.83139   1
  -4   0  -1 -2.5015  2.0925   3
  -4   0  -1 -4.5131  1.7492   2
  -5   0  -1 194.111   8.950   2
  -5   0  -1 211.983   8.964   3
   5   0   1 214.460  11.098   1
  -6   0  -1 -6.9634  1.9946   2
   6   0   1 7.20795 3.57502   1
  -6   0  -1 -1.6282  2.3398   3
  -7   0  -1 939.230  28.524   2
  -7   0  -1 942.265  27.858   3
   7   0   1 969.889  32.086   1
   8   0   1 -1.0215  3.6558   1
  -8   0  -1 -5.6255  2.8882   2
  -8   0  -1 -0.6420  3.0323   3
  -9   0  -1 782.919  26.371   2
   9   0   1 761.941  29.780   1
  -9   0  -1 756.093  25.236   3
 -10   0  -1 -3.1586  3.5250   2
  10   0   1 -0.8085  4.5698   1
 -10   0  -1 -4.9389  3.2772   3
  11   0   1 883.662  34.635   1
 -11   0  -1 834.230  28.645   3
 -11   0  -1 862.021  30.282   2
  12   0   1 -4.6600  5.0473   1
 -12   0  -1 -3.2770  3.5022   3
 -12   0  -1 2.56671 4.26346   2
  13   0   1 658.822  31.464   1
 -13   0  -1 711.035  28.027   2
 -13   0  -1 679.936  26.121   3
 -14   0  -1 -2.1593  4.5397   2
  14   0   1 4.76457 6.12385   1
 -14   0  -1 3.79038 5.26226   3
 -15   0  -1 329.955  18.115   3
 -15   0  -1 349.275  20.041   2
  15   0   1 356.446  23.624   1
 -16   0  -1 -4.1785  5.6087   2
  16   0   1 4.45756 7.72344   1
 -16   0  -1 -0.8772  5.5758   3
  17   0   1 186.770  22.212   1
 -17   0  -1 222.108  20.352   2
  18   0   1 5.10209 7.18746   1
 -18   0  -1 2.04239 7.00334   2
 -19   0  -1 27.1568  9.4443   2
  19   0   1 9.09949 9.51296   1
  20   0   1 3.99431 9.18529   1
  21   0   1 -8.5257  6.8136   1
  22   0   1 0.65152 7.94498   1
  23   0   1 -5.4063  9.7369   1
  24   0   1 -1.2306 12.1220   1
  25   0   1 -6.1407  9.5644   1
  26   0   1 -6.7007  9.4920   1
  27  -1  -1  6.8974 11.1036   1
  27   1  -1 -1.1020 11.8042   1
  26  -1  -1 15.5448 12.2113   1
  26   1  -1  3.2012 11.0733   1
  25  -1  -1 22.9481 11.9285   1
  25   1  -1 13.8626 11.8889   1
  24  -1  -1 -5.4313 10.6854   1
  24   1  -1  5.1766 11.1266   1
  23  -1  -1 46.3495 15.8522   1
  23   1  -1 26.7977 12.4662   1
 -22  -1   1 10.1456  9.5017   2
  22  -1  -1 1.86076 9.20612   1
  22   1  -1  2.8636 10.2928   1
  21  -1  -1 82.4196 16.8340   1
 -21  -1   1 90.2300 15.1483   2
  21   1  -1 86.1849 16.1760   1
  20  -1  -1 -0.2058  7.4110   1
 -20  -1   1 6.35250 8.41235   2
  20   1  -1 11.2796  9.1750   1
  19  -1  -1 158.216  20.889   1
 -19  -1   1 184.532  20.924   2
  19   1  -1 137.444  19.713   1
  18  -1  -1 -4.2991  6.2080   1
 -18  -1   1 6.38508 6.57601   2
 -18   1   1 10.2472  7.8971   2
  18   1  -1 10.3034  9.1802   1
 -18   1   1 -3.3464  5.6260   3
 -17  -1   1 38.1329 10.6772   2
  17  -1  -1 32.1251 11.5122   1
 -17   1   1 30.8809  8.8075   2
  17   1  -1 35.9230 11.1062   1
 -17   1   1 33.9321  9.5338   3
 -16  -1   1 3.34953 5.94101   2
  16  -1  -1 -3.5014  6.4234   1
  16   1  -1 -8.1990  5.0271   1
 -16   1   1 -5.2378  5.3275   2
 -16   1   1 -1.6495  5.2999   3
  15  -1  -1 97.2111 14.8505   1
 -15  -1   1 133.899  15.996   2
  15   1  -1 138.048  17.249   1
 -15   1   1 110.494  12.959   3
 -15   1   1 111.778  13.141   2
 -14  -1   1 28.8205  6.1778   3
 -14  -1   1 28.4132  7.8511   2
  14  -1  -1 10.3961  6.9314   1
 -14   1   1 13.5251  6.3912   3
  14   1  -1 29.5837  8.9473   1
 -14   1   1 11.9372  6.3769   2
 -13  -1   1 215.343  15.150   2
 -13  -1   1 200.588  11.483   3
  13  -1  -1 186.071  18.393   1
 -13   1   1 164.824  12.861   3
  13   1  -1 159.350  17.267   1
 -13   1   1 198.615  13.586   2
 -12  -1   1 13.4847  6.0798   2
  12  -1  -1 18.1314  6.7349   1
 -12  -1   1 5.52163 3.87378   3
 -12   1   1 15.3488  5.6644   2
 -12   1   1 15.4262  5.1887   3
  12   1  -1 8.03497 5.53650   1
 -11  -1   1 23.5483  6.9714   2
  11  -1  -1 39.9613  8.2168   1
 -11  -1   1 40.2735  5.6781   3
  11   1  -1 30.1990  7.6009   1
 -11   1   1 46.3038  7.8011   2
 -11   1   1 32.4831  6.7526   3
 -10  -1   1 140.999  12.857   2
  10  -1  -1 121.600  12.808   1
 -10  -1   1 113.165   7.695   3
 -10   1   1 121.869  10.826   2
  10   1  -1 103.840  11.841   1
 -10   1   1 123.480  11.346   3
  -9  -1   1 71.9909  9.0430   2
   9  -1  -1 63.1164  9.2149   1
  -9  -1   1 76.4987  5.8435   3
   9   1  -1 77.9804 10.0017   1
  -9   1   1 90.4134  9.0332   2
  -9   1   1 76.5547  9.0014   3
   8  -1  -1 71.1933  8.7452   1
  -8   1   1 89.3479  8.3488   2
   8   1  -1 80.4751  9.1287   1
   7  -1  -1 89.1191  9.2340   1
  -7  -1   1 95.2822  5.1289   3
  -7  -1   1 103.582   9.388   2
  -7   1   1 78.1327  7.6244   2
   7   1  -1 81.1608  8.2247   1
   6  -1  -1 38.2540  6.4184   1
  -6  -1   1 42.1277  6.1688   2
  -6   1   1 41.7213  5.3580   2
   6   1  -1 36.2681  5.2462   1
  -5  -1   1 626.466  20.973   2
   5  -1  -1 616.142  20.424   1
   5   1  -1 610.938  19.884   1
  -5   1   1 654.772  18.706   2
   4  -1  -1 294.873  10.996   1
  -4  -1   1 255.920  11.154   2
   4   1  -1 246.335  10.122   1
  -4   1   1 259.182   9.072   2
  -3  -1   1 841.565  23.577   1
  -3  -1   1 852.738  24.247   2
   3  -1  -1 858.738  22.987   1
   3   1  -1 869.307  23.226   1
  -3   1   1 862.231  21.808   2
  -2  -1   1 77.7652  4.4005   1
  -2  -1   1 69.0213  4.4159   2
   2  -1  -1 68.4594  4.3909   3
   2   1  -1 66.2307  4.1565   1
  -1  -1   1 7812.00  176.47   1
   1  -1  -1 7877.87  179.55   3
   0  -1   1 44.4622  3.1876   1
  -1  -1  -1 1775.09   42.90   2
   1  -1   1 1764.84   42.41   1
  -1   1  -1 1714.76   43.07   3
   2  -1   1 438.741  13.743   1
  -2  -1  -1 427.487  13.788   2
   2   1   1 445.890  13.181   1
  -2   1  -1 456.175  14.274   3
   3  -1   1 816.155  23.874   1
  -3  -1  -1 854.624  24.147   2
  -3   1  -1 880.005  24.609   3
   3   1   1 850.780  23.575   1
   4  -1   1 100.274   6.693   1
  -4  -1  -1 77.4840  5.7658   2
  -4   1  -1 87.4274  6.2142   3
   4   1   1 100.973   6.365   1
  -5  -1  -1 3526.84   86.34   2
  -5  -1  -1 3612.54   82.15   3
   5  -1   1 3621.42   86.53   1
  -5   1  -1 3492.17   86.81   3
  -5   1  -1 3538.68   82.81   2
   5   1   1 3370.21   85.58   1
   6  -1   1 324.653  15.017   1
  -6  -1  -1 342.224  14.308   2
  -6  -1  -1 329.242  10.773   3
  -6   1  -1 343.347  12.033   2
  -6   1  -1 310.227  13.707   3
   6   1   1 312.040  14.590   1
  -7  -1  -1 284.371  13.864   2
   7  -1   1 288.046  14.985   1
  -7  -1  -1 319.845  11.036   3
  -7   1  -1 302.808  13.863   3
   7   1   1 311.681  15.339   1
  -7   1  -1 302.244  12.105   2
  -8  -1  -1 314.867  15.314   2
   8  -1   1 302.484  16.405   1
  -8  -1  -1 346.005  12.477   3
  -8   1  -1 350.442  15.804   3
   8   1   1 351.008  17.294   1
  -8   1  -1 336.458  13.645   2
  -9  -1  -1 788.007  23.261   3
   9  -1   1 734.228  29.049   1
  -9  -1  -1 730.767  27.229   2
  -9   1  -1 775.660  26.923   3
   9   1   1 794.680  29.857   1
  -9   1  -1 751.780  24.764   2
 -10  -1  -1 25.4955  4.9368   3
 -10  -1  -1 22.6457  5.9761   2
  10  -1   1 19.5771  6.3674   1
 -10   1  -1 37.9772  6.1527   2
 -10   1  -1 32.7581  6.7524   3
  10   1   1 27.9631  7.3167   1
 -11  -1  -1 23.0886  6.4809   2
 -11  -1  -1 37.5708  5.7496   3
  11  -1   1 24.5772  7.5226   1
  11   1   1 14.7840  6.3611   1
 -11   1  -1 30.3379  6.7401   3
 -11   1  -1 26.6586  5.6419   2
  12  -1   1 -2.8760  4.4686   1
 -12  -1  -1 -5.8096  4.3236   2
 -12  -1  -1 -0.3077  3.7754   3
  12   1   1 7.69344 6.04657   1
 -12   1  -1 5.65139 5.03631   3
 -12   1  -1 3.13396 3.87179   2
 -13  -1  -1 4.24943 5.38883   2
  13  -1   1 4.70753 6.51256   1
 -13  -1  -1 11.5231  5.0684   3
 -13   1  -1 0.36615 5.34573   3
  13   1   1 4.46275 5.91082   1
 -13   1  -1 2.02283 4.55316   2
 -14  -1  -1 12.8225  5.5847   3
  14  -1   1 13.9238  7.6819   1
 -14  -1  -1 3.15881 5.06774   2
 -14   1  -1 8.35245 6.37237   3
  14   1   1 6.57953 6.61451   1
 -14   1  -1 -1.9476  4.5351   2
  15  -1   1 251.890  23.218   1
 -15  -1  -1 251.250  18.197   2
 -15   1  -1 258.221  17.464   3
 -15   1  -1 281.223  16.965   2
  15   1   1 301.368  22.186   1
  16  -1   1 -1.0751  6.3111   1
 -16  -1  -1 4.06595 7.06100   2
 -16   1  -1 5.91074 7.22832   3
 -16   1  -1 9.77842 6.49653   2
  16   1   1 13.1972  8.7929   1
 -17  -1  -1 127.530  16.186   2
  17  -1   1 107.297  17.085   1
 -17   1  -1 128.786  14.748   2
 -17   1  -1 123.305  15.405   3
  17   1   1 114.811  17.146   1
 -18  -1  -1 17.4700  8.1589   2
  18  -1   1 17.0891 11.0578   1
 -18   1  -1 -4.7444  6.6698   3
  18   1   1 0.64856 7.00572   1
 -19  -1  -1 134.657  18.277   2
  19  -1   1 93.5233 17.7461   1
  19   1   1 85.5859 16.5908   1
  20  -1   1  6.1873 10.2096   1
 -20  -1  -1 -12.817   6.582   2
  20   1   1 1.62625 7.39913   1
 -21  -1  -1 75.1795 15.1596   2
  21  -1   1 60.1464 14.9420   1
  21   1   1 73.1390 16.1091   1
  22  -1   1 2.00951 8.46438   1
  22   1   1 4.28454 8.70154   1
  23  -1   1 15.0741 10.8913   1
  23   1   1  8.0877 10.2698   1
  24  -1   1 10.3427 10.7769   1
  24   1   1 -0.5207 12.4197   1
  25  -1   1  6.0030 10.3440   1
  25   1   1 20.8998 12.7299   1
  26  -1   1  7.3354 11.3179   1
  26   1   1 -4.9617 11.5629   1
  27  -2  -1  3.1501 11.0832   1
  26  -2  -1 -8.0800  9.2885   1
  26   2  -1 -2.5558 11.2355   1
  25  -2  -1 -1.4132 11.7037   1
  25   2  -1 -3.9084  9.9554   1
  24  -2  -1 -2.1385  9.0802   1
 -24  -2   1 -1.6186 10.4961   2
  24   2  -1  9.4300 11.2322   1
 -23  -2   1  2.3049 10.5850   2
  23  -2  -1 -12.302   9.381   1
  23   2  -1 -6.1515  8.0661   1
  22  -2  -1 3.68655 8.64222   1
 -22  -2   1 23.1730 11.9870   2
  22   2  -1 -2.3034  7.9966   1
  21  -2  -1 0.06031 7.23571   1
 -21  -2   1 3.60172 7.04579   2
  21   2  -1 -5.0838  8.1751   1
 -20  -2   1 1.12526 8.84348   2
  20  -2  -1 18.9931  9.7528   1
  20   2  -1 -0.7324  8.2060   1
  19  -2  -1 4.67421 7.42304   1
 -19  -2   1 -2.2486  7.7852   2
 -19   2   1 -2.3961  7.4483   3
  19   2  -1 -0.2703  7.2978   1
 -18  -2   1 53.0822 12.6208   2
  18  -2  -1 33.3900 11.3799   1
  18   2  -1 61.6341 13.7397   1
 -18   2   1 38.0217 11.1496   3
  17  -2  -1 27.6231  9.6929   1
 -17  -2   1 52.7755 11.6624   2
 -17   2   1 30.3399  9.7039   3
  17   2  -1 45.2932 12.6080   1
 -16  -2   1 110.620  15.295   2
  16  -2  -1 108.041  15.631   1
 -16   2   1 136.311  14.237   2
 -16   2   1 107.182  14.335   3
  16   2  -1 124.707  17.369   1
  15  -2  -1 115.650  16.204   1
 -15  -2   1 157.400  17.644   2
 -15   2   1 130.341  13.373   2
  15   2  -1 111.691  15.477   1
 -15   2   1 116.729  14.498   3
  14  -2  -1 99.2879 13.9709   1
 -14  -2   1 149.740  16.808   2
  14   2  -1 135.738  16.776   1
 -14   2   1 107.486  12.000   2
 -14   2   1 100.912  13.099   3
 -13  -2   1 460.016  24.515   2
  13  -2  -1 538.597  26.217   1
 -13   2   1 520.253  24.814   3
  13   2  -1 488.298  25.808   1
 -13   2   1 531.595  22.098   2
 -12  -2   1 159.801  15.974   2
  12  -2  -1 212.125  18.420   1
  12   2  -1 177.104  16.907   1
 -12   2   1 194.468  12.364   2
 -12   2   1 189.098  14.181   3
  11  -2  -1 438.721  22.013   1
 -11  -2   1 427.664  13.649   3
 -11  -2   1 421.207  21.518   2
 -11   2   1 459.806  21.754   3
 -11   2   1 468.874  18.968   2
  11   2  -1 435.801  21.627   1
  10  -2  -1 25.5671  6.3905   1
 -10  -2   1 31.1107  7.0108   2
 -10  -2   1 33.9122  3.5991   3
 -10   2   1 22.7530  6.6199   3
 -10   2   1 31.6450  6.1765   2
  10   2  -1 34.2436  7.1390   1
   9  -2  -1 2014.01   58.34   1
  -9  -2   1 2012.66   59.56   2
  -9   2   1 2179.20   54.45   2
   9   2  -1 2032.47   57.92   1
  -8  -2   1 5.44709 4.25241   2
   8  -2  -1 4.12607 3.62435   1
  -8   2   1 7.44857 3.48384   2
   8   2  -1 7.16873 4.09312   1
  -7  -2   1 1224.99   37.88   2
   7  -2  -1 1211.32   36.30   1
   7   2  -1 1162.70   35.66   1
  -7   2   1 1225.44   32.51   2
   6  -2  -1 174.649   9.798   1
  -6  -2   1 171.615  10.720   2
  -6   2   1 176.412   7.881   2
   6   2  -1 163.774   9.567   1
  -5  -2   1 794.167  26.547   2
   5  -2  -1 861.598  25.512   1
  -5   2   1 816.581  22.202   2
   5   2  -1 802.135  25.097   1
  -4  -2   1 336.800  14.209   2
  -4  -2   1 324.781  13.800   1
   4  -2  -1 337.386  12.936   1
   4   2  -1 329.220  13.260   1
  -4   2   1 363.257  10.962   2
  -3  -2   1 278.307  11.907   1
  -3  -2   1 288.967  12.189   2
   3  -2  -1 292.694  11.222   1
  -3   2   1 302.779   9.643   2
   3   2  -1 279.767  11.810   1
  -2  -2   1 83.4208  6.1930   1
  -2  -2   1 82.5222  6.8763   2
   2  -2  -1 80.1680  5.5620   1
  -1  -2   1 2097.44   52.84   2
   1  -2  -1 2150.02   54.10   3
   1  -2  -1 2202.08   52.38   2
   1  -2  -1 2133.48   52.54   1
  -1  -2   1 2212.06   54.00   1
   1   2  -1 2093.88   52.30   3
   0  -2  -1 5218.87  120.19   1
   0  -2   1 5190.22  120.36   2
   0  -2  -1 5130.67  121.32   2
   0  -2   1 5197.47  121.17   1
   0  -2  -1 5253.80  122.11   3
   0   2  -1 5278.55  122.31   3
  -1  -2  -1 67.6114  5.0255   1
   1  -2   1 59.7147  5.7567   1
  -1  -2  -1 65.3437  4.3025   3
   1  -2   1 64.7204  3.8318   2
  -1  -2  -1 70.9429  5.1632   2
  -1   2  -1 74.1338  5.6270   3
  -2  -2  -1 214.887   7.681   3
   2  -2   1 189.625   9.267   1
  -2  -2  -1 205.233   9.626   2
  -2  -2  -1 221.324   9.620   1
  -2   2  -1 214.993  10.165   3
   2   2   1 207.670   9.222   1
  -3  -2  -1 938.231  27.440   2
  -3  -2  -1 908.400  26.467   1
   3  -2   1 882.602  26.471   1
   3   2   1 888.742  25.751   1
  -3   2  -1 913.760  27.815   3
   4  -2   1 9.66658 3.34704   1
  -4  -2  -1 2.93133 2.61692   2
  -4   2  -1 5.43148 3.30429   3
   4   2   1 6.63139 2.60596   1
  -5  -2  -1 163.461   9.894   2
   5  -2   1 166.218   9.760   1
  -5   2  -1 170.292  10.353   3
   5   2   1 179.183   9.481   1
  -6  -2  -1 206.829  11.888   2
   6  -2   1 230.730  12.154   1
   6   2   1 226.791  11.742   1
  -6   2  -1 223.227  12.475   3
  -6   2  -1 230.763   8.615   2
   7  -2   1 2539.69   67.25   1
  -7  -2  -1 2467.72   67.42   2
  -7  -2  -1 2601.32   59.23   3
   7   2   1 2447.52   66.01   1
  -7   2  -1 2495.43   68.10   3
  -7   2  -1 2495.38   61.05   2
   8  -2   1 59.5555  8.3744   1
  -8  -2  -1 63.6996  4.0241   3
  -8  -2  -1 63.0510  8.3972   2
  -8   2  -1 75.4669  6.6179   2
   8   2   1 50.8815  7.7322   1
  -8   2  -1 68.1217  8.7986   3
   9  -2   1 1021.91   36.29   1
  -9  -2  -1 1103.66   27.81   3
  -9  -2  -1 1054.74   36.08   2
   9   2   1 1008.16   35.67   1
  -9   2  -1 1098.59   30.80   2
  -9   2  -1 1087.89   36.58   3
  10  -2   1 56.5519  9.7275   1
 -10  -2  -1 63.1338  4.8144   3
 -10  -2  -1 65.3731  9.3573   2
 -10   2  -1 79.6602  7.7885   2
 -10   2  -1 54.5189  8.5205   3
  10   2   1 74.1780 10.3380   1
 -11  -2  -1 512.084  23.576   2
 -11  -2  -1 513.832  16.080   3
  11  -2   1 460.608  23.684   1
 -11   2  -1 536.881  19.583   2
  11   2   1 494.310  24.529   1
 -11   2  -1 483.116  22.815   3
  12  -2   1 209.437  19.017   1
 -12  -2  -1 177.522  16.733   2
 -12   2  -1 203.628  14.401   3
 -12   2  -1 196.723  11.752   2
  12   2   1 204.223  19.097   1
 -13  -2  -1 630.549  28.572   2
  13  -2   1 658.773  30.288   1
 -13   2  -1 652.833  24.056   2
 -13   2  -1 603.435  27.647   3
  13   2   1 596.147  29.956   1
  14  -2   1 57.3287 11.2836   1
 -14  -2  -1 90.8573 12.9781   2
 -14   2  -1 76.8853  9.7832   2
 -14   2  -1 84.7894 12.9476   3
  14   2   1 70.3561 12.8812   1
 -15  -2  -1 233.703  21.360   2
  15  -2   1 272.169  24.443   1
 -15   2  -1 234.010  18.099   3
  15   2   1 243.515  23.491   1
 -16  -2  -1 167.051  18.508   2
  16  -2   1 156.181  19.565   1
 -16   2  -1 169.417  18.276   3
  16   2   1 132.858  17.996   1
  17  -2   1 157.236  19.747   1
 -17  -2  -1 195.813  21.011   2
 -17   2  -1 179.510  19.351   3
  17   2   1 160.853  21.219   1
  18  -2   1 22.8622 10.0551   1
 -18  -2  -1 32.5107 10.3585   2
  18   2   1 20.6548 10.1626   1
 -18   2  -1 38.5322 11.0763   3
  19  -2   1 13.3272  8.6919   1
 -19  -2  -1 22.6101  9.8960   2
 -19   2  -1 13.8063  8.6652   3
  19   2   1 7.34654 9.39611   1
  20  -2   1 16.3646  9.3682   1
 -20  -2  -1 14.6626 10.6918   2
  20   2   1 17.3369 10.7715   1
 -21  -2  -1 8.55221 9.34757   2
  21  -2   1 8.91703 8.94124   1
  21   2   1 3.06943 9.53189   1
 -22  -2  -1 -7.4929  7.9444   2
  22  -2   1 -7.7299  9.5666   1
  22   2   1 4.98614 9.48928   1
  23  -2   1 0.94482 8.57011   1
 -23  -2  -1 7.71211 9.37314   2
  23   2   1 1.61058 9.59239   1
  24  -2   1  2.5622 10.0995   1
  24   2   1  4.7751 10.7982   1
  25  -2   1  8.5347 11.5073   1
  25   2   1 0.88115 9.83628   1
  26  -2   1  1.1998 10.8141   1
  26   2   1 11.0043 12.1126   1
  26  -3  -1 9.79130 8.62429   1
 -26  -3   1  0.7734 10.6637   2
  26   3  -1 22.2062 15.3551   1
  25  -3  -1 11.6426 10.3903   1
 -25  -3   1 13.5850 12.8565   2
  25   3  -1 -4.1581  9.2467   1
 -24  -3   1 -6.9886 11.1636   2
  24  -3  -1 8.74353 9.16156   1
  24   3  -1 13.5745 14.0123   1
  23  -3  -1 15.8288 10.2586   1
 -23  -3   1 24.0899 11.8752   2
  23   3  -1  2.5307 11.2173   1
  22  -3  -1 32.1790 12.0682   1
 -22  -3   1 13.5741 10.1659   2
  22   3  -1 26.5997 13.4679   1
 -21  -3   1 36.3889 12.9749   2
  21  -3  -1 13.3258  8.7093   1
 -21   3   1 25.9299 11.1397   3
  21   3  -1 20.5316 11.7083   1
 -20  -3   1 65.7771 14.3233   2
  20  -3  -1 47.3194 13.7248   1
  20   3  -1 20.7532 10.9385   1
 -20   3   1 54.9846 14.0082   3
 -19  -3   1 55.7654 13.6305   2
  19  -3  -1 37.0225 11.4090   1
  19   3  -1 24.4712 11.0786   1
 -19   3   1 31.0206 10.1297   3
 -18  -3   1 40.6447 12.4004   2
  18  -3  -1 30.2296 10.3532   1
  18   3  -1 28.9295 11.7152   1
 -18   3   1 42.4601 11.8041   3
  17  -3  -1 119.235  17.351   1
 -17  -3   1 153.977  19.043   2
 -17   3   1 115.350  16.137   3
  17   3  -1 78.0815 14.8021   1
  16  -3  -1 7.24765 7.04079   1
 -16  -3   1 2.94981 6.35313   2
  16   3  -1 0.61419 6.86820   1
 -16   3   1 1.63681 6.33882   3
  15  -3  -1 30.0350  8.6387   1
 -15  -3   1 6.05146 7.35548   2
  15   3  -1 17.6733  8.6602   1
 -15   3   1 18.3899  8.0569   3
 -14  -3   1 12.1829  7.0161   2
  14  -3  -1 22.4015  7.4172   1
  14   3  -1 16.2195  7.5896   1
 -14   3   1 33.3796  7.6826   2
 -14   3   1 9.90949 6.40838   3
  13  -3  -1 37.4981  8.9637   1
 -13  -3   1 30.4113  8.7414   2
 -13   3   1 42.4649  9.3600   3
 -13   3   1 38.7305  7.5745   2
  13   3  -1 35.6938  8.8248   1
 -12  -3   1 3.46506 5.60970   2
  12  -3  -1 -4.5937  3.5278   1
 -12   3   1 5.07185 5.61161   3
 -12   3   1 -1.2876  4.9582   2
  12   3  -1 -3.5231  4.0247   1
  11  -3  -1 20.0682  6.4191   1
 -11  -3   1 0.52214 4.80952   2
 -11   3   1 19.0049  7.1496   3
 -11   3   1 17.4011  5.3650   2
  11   3  -1 6.19591 4.80396   1
  10  -3  -1 36.0572  7.3745   1
 -10  -3   1 32.3966  7.9412   2
 -10   3   1 38.2890  6.1180   2
 -10   3   1 36.6472  7.8960   3
  10   3  -1 40.1351  7.9870   1
   9  -3  -1 2.04993 4.21755   1
  -9  -3   1 0.44020 3.98497   2
  -9   3   1 -1.9704  3.4927   2
   9   3  -1 0.82492 3.32159   1
  -8  -3   1 33.0518  6.9907   2
   8  -3  -1 36.7346  6.8354   1
   8   3  -1 31.0526  6.2734   1
  -8   3   1 33.0027  4.9041   2
  -7  -3   1 17.2149  5.7288   2
   7  -3  -1 18.7929  4.9293   1
   7   3  -1 23.3252  5.6366   1
  -7   3   1 23.5845  3.9376   2
  -6  -3   1 238.242  13.621   2
   6  -3  -1 241.964  12.774   1
  -6  -3   1 229.369  13.223   1
   6   3  -1 232.926  12.565   1
  -6   3   1 257.025   9.689   2
   5  -3  -1 429.172  16.938   1
  -5  -3   1 422.893  18.255   2
  -5  -3   1 405.710  17.836   1
  -5   3   1 429.930  13.687   2
   5   3  -1 418.919  17.348   1
  -4  -3   1 463.844  18.403   1
   4  -3  -1 487.713  17.845   1
  -4  -3   1 444.858  18.292   2
  -4   3   1 468.775  14.620   2
   4   3  -1 436.250  18.008   1
   4   3  -1 477.102  13.705   3
   3  -3  -1 1152.42   32.30   1
  -3  -3   1 1063.19   32.62   2
  -3  -3   1 1057.08   32.76   1
   3   3  -1 1072.17   28.78   3
  -3   3   1 1103.06   29.34   2
  -2  -3   1 500.564  17.973   2
   2  -3  -1 494.397  17.849   1
   2  -3  -1 477.405  16.002   2
  -2  -3   1 487.688  18.713   1
   2   3  -1 508.411  16.215   3
  -1  -3   1 1434.85   39.09   2
  -1  -3   1 1439.70   40.75   1
   1  -3  -1 1486.59   38.69   2
   1  -3  -1 1418.79   39.54   1
   1   3  -1 1454.70   39.02   3
   0  -3   1 2220.66   58.06   1
   0  -3   1 2241.46   55.71   2
   0  -3  -1 2196.19   56.89   1
   0  -3  -1 2247.41   56.72   2
   0   3  -1 2190.50   57.35   3
  -1  -3  -1 1110.99   31.99   1
  -1  -3  -1 1095.54   31.77   2
   1  -3   1 1057.29   32.52   1
   1  -3   1 1061.19   29.17   2
  -1  -3  -1 1137.66   31.00   3
  -1   3  -1 1089.18   32.63   3
  -2  -3  -1 445.583  17.381   2
  -2  -3  -1 463.969  17.200   1
  -2  -3  -1 446.903  15.122   3
   2  -3   1 440.166  17.551   1
   2  -3   1 454.570  13.962   2
  -2   3  -1 446.971  17.954   3
   3  -3   1 1103.61   27.62   2
  -3  -3  -1 1061.94   28.83   3
  -3  -3  -1 1083.71   32.32   1
   3  -3   1 1061.46   32.54   1
  -3  -3  -1 1042.28   32.82   2
   3   3   1 1100.56   32.09   1
  -3   3  -1 1071.57   33.77   3
  -4  -3  -1 511.696  15.555   3
  -4  -3  -1 566.144  20.963   2
   4  -3   1 490.920  19.553   1
  -4  -3  -1 535.741  20.256   1
  -4   3  -1 484.290  20.545   3
  -4   3  -1 545.218  14.610   2
   4   3   1 544.417  19.525   1
   5  -3   1 672.048  23.883   1
  -5  -3  -1 682.964  18.296   3
  -5  -3  -1 630.670  24.319   2
  -5   3  -1 639.517  24.961   3
   5   3   1 689.977  23.228   1
  -5   3  -1 659.265  17.591   2
  -6  -3  -1 4.94552 3.65358   2
   6  -3   1 5.84011 3.77455   1
   6   3   1 18.6976  4.4306   1
  -6   3  -1 15.8181  2.6551   2
  -6   3  -1 5.66599 3.98367   3
   7  -3   1 73.8763  9.1822   1
  -7  -3  -1 85.1323  9.8036   2
  -7   3  -1 84.0932  5.2378   2
   7   3   1 64.9471  8.1551   1
  -7   3  -1 71.1380  9.8896   3
  -8  -3  -1 4.69906 4.18338   2
   8  -3   1 3.87865 3.84467   1
   8   3   1 1.97137 3.77108   1
  -8   3  -1 8.21928 4.97190   3
  -8   3  -1 9.85126 3.27321   2
  -9  -3  -1 10.8176  5.1658   2
   9  -3   1 26.5484  6.5658   1
  -9   3  -1 28.3617  7.3521   3
  -9   3  -1 31.7351  4.8907   2
   9   3   1 20.0180  5.6448   1
 -10  -3  -1 1.18761 4.10165   2
  10  -3   1 -2.7246  3.6520   1
 -10   3  -1 -4.8842  3.9996   3
 -10   3  -1 4.46555 3.55207   2
  10   3   1 4.25049 4.54571   1
  11  -3   1 17.4518  6.3065   1
 -11  -3  -1 26.7703  7.6106   2
 -11   3  -1 15.5308  6.8371   3
  11   3   1 2.63839 4.21572   1
 -11   3  -1 19.7086  4.8979   2
  12  -3   1 3.28904 4.72767   1
 -12  -3  -1 -6.1202  5.3669   2
 -12   3  -1 2.40855 5.28022   3
  12   3   1 -0.1056  4.6057   1
 -12   3  -1 1.22149 3.87395   2
  13  -3   1 12.2804  6.2495   1
 -13  -3  -1 8.49643 6.08452   2
 -13   3  -1 14.6698  6.7741   3
  13   3   1 1.80172 5.21240   1
 -14  -3  -1 8.93306 6.44684   2
  14  -3   1 13.7382  7.0421   1
  14   3   1 20.2252  8.5597   1
 -14   3  -1 -1.0842  5.5447   3
 -15  -3  -1 50.7884 11.3143   2
  15  -3   1 53.8468 11.5937   1
 -15   3  -1 29.2923 10.0084   3
  15   3   1 51.9834 12.0441   1
 -16  -3  -1 49.0619 11.3677   2
  16  -3   1 67.7166 13.2796   1
  16   3   1 81.2494 14.5247   1
 -16   3  -1 82.0333 14.5007   3
  17  -3   1 125.976  17.908   1
 -17  -3  -1 119.814  17.474   2
  17   3   1 73.3270 14.9664   1
 -17   3  -1 125.174  17.708   3
 -18  -3  -1 42.0566 11.9227   2
  18  -3   1 13.2558  9.0696   1
  18   3   1 25.5443 10.5180   1
 -18   3  -1 12.6368  9.8155   3
 -19  -3  -1 54.8453 13.7824   2
  19  -3   1 43.4789 12.6424   1
  19   3   1 66.3655 15.3673   1
 -19   3  -1 55.1661 13.7965   3
  20  -3   1 16.9974 10.0544   1
 -20  -3  -1 43.0909 12.4686   2
 -20   3  -1 29.9468 12.1500   3
  20   3   1  4.2979 10.7140   1
 -21  -3  -1 34.0832 11.9319   2
  21  -3   1 20.4957 10.5397   1
 -21   3  -1 14.3191 11.0458   3
  21   3   1 21.0954 12.8867   1
 -22  -3  -1 -1.8655 10.9549   2
  22  -3   1 -1.8243  7.1851   1
  22   3   1 -5.5233  9.2448   1
  23  -3   1 29.0733 13.3834   1
 -23  -3  -1 17.1063 12.0853   2
  23   3   1 27.9188 12.7705   1
 -24  -3  -1  5.5246 11.9357   2
  24  -3   1  9.4692 10.4230   1
  24   3   1 -6.0391 11.7145   1
  25  -3   1 15.6928 11.5694   1
  25   3   1 33.4988 15.3503   1
  26  -3   1  7.8731 10.8221   1
  26   3   1  6.8938 14.3125   1
  25  -4  -1  0.1677 10.2947   1
 -25  -4   1  8.3290 13.1817   2
  25   4  -1 10.4618 13.8591   1
 -24  -4   1 11.5572 11.4778   2
  24  -4  -1 -1.0793  9.3078   1
  24   4  -1  6.3824 14.0043   1
  23  -4  -1 -6.7281  9.7611   1
 -23  -4   1 13.9853 11.1586   2
  23   4  -1 -3.5803  9.6773   1
  22  -4  -1 7.25035 8.62262   1
 -22  -4   1 -1.8690  8.9945   2
 -22   4   1 -0.1392 10.8042   3
  22   4  -1 1.19843 8.88045   1
 -21  -4   1 -6.1975  9.3636   2
  21  -4  -1 -0.8611  8.4046   1
 -21   4   1 1.07018 8.93852   3
  21   4  -1  3.9513 10.9450   1
  20  -4  -1 5.32533 9.02801   1
 -20  -4   1 5.19203 9.48392   2
 -20   4   1 14.1926 11.2145   3
  20   4  -1 -3.4758  9.4735   1
 -19  -4   1 -7.5387  6.4235   2
  19  -4  -1 -11.007   6.671   1
 -19   4   1 -1.5505  8.4984   3
  19   4  -1 0.79242 9.92189   1
 -18  -4   1 6.85370 7.95277   2
  18  -4  -1 -2.7065  5.1849   1
 -18   4   1 9.20523 8.37041   3
  18   4  -1 10.3885  9.5039   1
 -17  -4   1 0.21878 8.39546   2
  17  -4  -1 16.7352  8.5203   1
  17   4  -1 14.9725  9.2157   1
 -17   4   1 13.7191  9.4929   3
  16  -4  -1 32.4846  9.9364   1
 -16  -4   1 33.6749 10.3806   2
 -16   4   1 35.9418 11.2737   3
  16   4  -1 51.9236 12.2340   1
 -15  -4   1 30.0397  9.3209   2
  15  -4  -1 16.8142  7.4061   1
 -15   4   1 51.9352 11.3932   3
  15   4  -1 43.3216 10.5687   1
  14  -4  -1 211.223  20.600   1
 -14  -4   1 197.025  20.691   2
 -14   4   1 205.985  20.998   3
  14   4  -1 191.626  19.714   1
  13  -4  -1 77.8405 12.4030   1
 -13  -4   1 60.4669 11.8503   2
  13   4  -1 65.2325 11.1070   1
 -13   4   1 54.7907 11.3549   3
  12  -4  -1 229.277  16.432   1
 -12  -4   1 230.833  17.607   2
  12   4  -1 192.878  18.185   1
 -12   4   1 197.395  19.818   3
  11  -4  -1 249.977  16.420   1
 -11  -4   1 239.063  17.526   2
  11   4  -1 242.442  16.332   1
 -11   4   1 242.868  12.382   2
 -11   4   1 247.801  18.022   3
  10  -4  -1 232.704  15.639   1
 -10  -4   1 233.011  16.635   2
 -10   4   1 253.086  17.806   3
 -10   4   1 222.892  11.364   2
  10   4  -1 260.083  16.020   1
  -9  -4   1 620.553  28.010   2
   9  -4  -1 602.771  25.605   1
   9   4  -1 683.717  26.828   1
  -9   4   1 622.378  20.266   2
  -8  -4   1 123.794  13.783   2
   8  -4  -1 145.431  13.560   1
   8   4  -1 144.318  13.202   1
  -8   4   1 128.889   7.570   2
  -7  -4   1 579.872  25.145   2
  -7  -4   1 562.137  24.495   1
   7  -4  -1 610.796  23.823   1
  -7   4   1 581.627  18.531   2
   7   4  -1 586.885  23.755   1
  -6  -4   1 194.647  13.180   2
  -6  -4   1 204.381  13.515   1
   6  -4  -1 193.515  12.178   1
   6   4  -1 217.062  13.104   1
  -6   4   1 207.722   9.205   2
   6   4  -1 201.079   7.571   3
   5  -4  -1 357.613  16.714   1
  -5  -4   1 345.118  17.407   1
  -5  -4   1 371.053  17.732   2
   5   4  -1 333.135  16.982   1
   5   4  -1 362.192  12.246   3
  -5   4   1 365.311  13.104   2
  -4  -4   1 100.342  10.387   2
   4  -4  -1 107.879  10.149   1
  -4  -4   1 121.400  11.159   1
   4   4  -1 116.840   6.666   3
  -4   4   1 127.396   7.252   2
   4   4  -1 104.306  10.429   1
  -3  -4   1 20.3894  5.4651   1
   3  -4  -1 29.7679  4.8450   2
  -3  -4   1 35.7803  6.1071   2
   3  -4  -1 29.4938  6.0093   1
   3   4  -1 27.3582  4.3477   3
   2  -4  -1 91.6250  9.4697   1
   2  -4  -1 92.3190  8.2053   2
  -2  -4   1 110.509   9.942   2
  -2  -4   1 95.8922 10.1436   1
   2   4  -1 92.7398  6.9833   3
  -1  -4   1 4.68597 4.06586   1
   1  -4  -1 3.75387 3.34174   2
  -1  -4   1 -1.2935  3.0042   2
   1   4  -1 -2.0867  2.6517   3
   0  -4  -1 11.2383  4.2445   1
   0  -4  -1 21.7811  4.6667   2
   0  -4   1 -3.3945  3.4830   1
   0   4  -1 9.48562 3.79750   3
  -1  -4  -1 85.8029  8.5352   2
   1  -4   1 83.3708  7.3059   2
  -1  -4  -1 72.5958  8.3580   1
   1  -4   1 72.4328  8.7098   1
  -1   4  -1 64.5789  8.2287   3
   2  -4   1 63.5428  5.9986   2
  -2  -4  -1 56.2889  7.4281   2
  -2  -4  -1 43.7216  6.9661   1
   2  -4   1 65.1188  8.3745   1
  -2   4  -1 67.2978  8.4793   3
  -3  -4  -1 1.35092 3.46818   1
  -3  -4  -1 5.66569 3.52568   2
   3  -4   1 10.1661  4.6886   1
   3  -4   1 5.03526 2.47224   2
  -3   4  -1 8.54646 4.28563   3
   3   4   1 5.52244 3.81130   1
  -4  -4  -1 169.246  11.739   1
  -4  -4  -1 164.945  11.450   2
   4  -4   1 170.672  11.581   1
  -4   4  -1 181.195   7.755   2
   4   4   1 175.383  11.366   1
  -4   4  -1 187.290  12.678   3
  -5  -4  -1 391.480  18.757   1
  -5  -4  -1 410.003  19.447   2
   5  -4   1 405.624  18.887   1
  -5   4  -1 420.036  20.253   3
   5   4   1 428.539  18.481   1
  -5   4  -1 414.103  12.949   2
  -6  -4  -1 135.718   6.682   3
   6  -4   1 151.134  13.558   1
  -6  -4  -1 142.486  13.613   2
  -6   4  -1 128.174  13.466   3
  -6   4  -1 146.988   6.425   2
   6   4   1 143.182  10.328   1
   7  -4   1 884.726  32.727   1
  -7  -4  -1 938.183  24.710   3
  -7  -4  -1 974.646  34.716   2
   7   4   1 930.715  32.087   1
  -7   4  -1 955.796  24.909   2
  -7   4  -1 904.955  34.856   3
   8  -4   1 226.346  14.672   1
  -8  -4  -1 223.275  15.854   2
  -8   4  -1 244.893  16.469   3
   8   4   1 268.073  15.377   1
  -8   4  -1 242.720   9.443   2
   9  -4   1 622.134  26.727   1
  -9  -4  -1 626.753  27.767   2
  -9   4  -1 612.486  28.526   3
   9   4   1 597.945  25.642   1
  -9   4  -1 634.235  18.906   2
 -10  -4  -1 229.405  16.464   2
  10  -4   1 235.855  16.018   1
 -10   4  -1 209.657  16.308   3
  10   4   1 224.725  15.446   1
 -11  -4  -1 193.085  18.540   2
  11  -4   1 196.337  17.844   1
  11   4   1 169.104  16.245   1
 -11   4  -1 175.582  17.851   3
 -12  -4  -1 356.714  22.313   2
  12  -4   1 396.725  22.593   1
  12   4   1 332.489  20.782   1
 -12   4  -1 373.463  22.718   3
  13  -4   1 125.661  16.080   1
 -13  -4  -1 110.274  15.386   2
  13   4   1 97.0432 13.7015   1
 -13   4  -1 87.3202 14.0178   3
  14  -4   1 144.223  17.665   1
 -14  -4  -1 139.892  17.371   2
  14   4   1 154.077  17.662   1
 -14   4  -1 167.883  18.863   3
  15  -4   1 77.2725 13.9715   1
 -15  -4  -1 71.1285 13.2766   2
 -15   4  -1 68.9814 13.3935   3
  15   4   1 69.1287 13.2476   1
  16  -4   1 58.4930 13.4000   1
 -16  -4  -1 67.6335 13.4557   2
 -16   4  -1 55.6192 13.9035   3
  16   4   1 62.6569 14.1504   1
  17  -4   1 26.5997 10.3496   1
 -17  -4  -1 31.6064 11.3886   2
  17   4   1 33.2957 11.3903   1
 -17   4  -1 45.9077 12.2100   3
  18  -4   1 39.3351 12.1401   1
 -18  -4  -1 34.6404 12.8224   2
  18   4   1 18.9518 11.0565   1
 -18   4  -1 22.0144 10.5350   3
 -19  -4  -1 15.6841 10.7511   2
  19  -4   1 4.59681 8.11295   1
  19   4   1 18.0457 11.1871   1
 -19   4  -1 13.8020 10.1238   3
 -20  -4  -1 2.29314 7.94718   2
  20  -4   1 2.43721 8.40874   1
 -20   4  -1 -17.283   6.103   3
  20   4   1  4.2073 10.9536   1
 -21  -4  -1  6.5157 10.1557   2
  21  -4   1 -4.6705  7.9836   1
  21   4   1 1.18318 9.43398   1
 -21   4  -1 4.96982 9.24474   3
 -22  -4  -1  8.8670 10.8709   2
  22  -4   1 -6.4736  7.6892   1
 -22   4  -1 -11.627   8.585   3
  22   4   1 -3.9299  9.0543   1
 -23  -4  -1 -6.8621 11.0924   2
  23  -4   1 -7.7722 10.1853   1
  23   4   1 -0.2024 11.8268   1
 -24  -4  -1  2.5074 12.5074   2
  24  -4   1 -3.0676  9.8354   1
  24   4   1 -7.0862 13.6257   1
  25  -4   1 -9.2112  9.5317   1
 -25  -4  -1  1.5738 14.0037   2
  25   4   1  2.1318 12.6522   1
 -25  -5   1 -5.5493 13.9405   2
  25  -5  -1  2.6038 11.2891   1
  25   5  -1 -7.1992 12.6408   1
  24  -5  -1 -0.9728  9.2748   1
 -24  -5   1  5.2570 13.9176   2
  24   5  -1  4.1351 11.4901   1
 -24   5   1 -9.6527 12.6613   3
 -23  -5   1  4.4901 11.4681   2
  23  -5  -1 4.16366 8.80300   1
 -23   5   1 -2.7196 10.2441   3
  23   5  -1 -7.8200 11.5266   1
 -22  -5   1 35.8930 13.6368   2
  22  -5  -1 30.3328 12.3276   1
  22   5  -1 14.4595 12.2927   1
 -22   5   1 15.8696 13.6279   3
  21  -5  -1 12.3300 10.1662   1
 -21  -5   1 7.10773 9.22201   2
 -21   5   1 10.3924 12.0544   3
  21   5  -1  5.7435 10.5608   1
  20  -5  -1 28.1766 10.7136   1
 -20  -5   1 56.1938 15.6434   2
  20   5  -1 33.6390 13.4067   1
 -20   5   1 37.6777 12.5239   3
  19  -5  -1 27.3121 10.0130   1
 -19  -5   1 20.7894 10.6577   2
  19   5  -1 22.0240 11.5435   1
 -19   5   1 9.69932 8.73892   3
  18  -5  -1 55.5833 13.3575   1
 -18  -5   1 46.4939 12.8613   2
  18   5  -1 64.7369 15.3076   1
 -18   5   1 51.4148 13.3822   3
 -17  -5   1 28.5407 10.8264   2
  17  -5  -1 61.7769 13.0053   1
 -17   5   1 28.9764 10.6801   3
  17   5  -1 36.1550 11.7298   1
  16  -5  -1 71.3489 13.6536   1
 -16  -5   1 52.2656 12.6385   2
  16   5  -1 64.4998 13.4003   1
 -16   5   1 80.2164 15.0069   3
  15  -5  -1 17.9875  8.0436   1
 -15  -5   1 13.2802  8.6218   2
  15   5  -1 18.7131  8.8359   1
 -15   5   1 9.12967 7.36910   3
 -14  -5   1 31.8683  9.9238   2
  14  -5  -1 10.4816  7.1520   1
  14   5  -1 38.1700 10.1442   1
 -14   5   1 15.9233  8.8550   3
 -13  -5   1 10.2505  7.5045   2
  13  -5  -1 12.1775  7.0589   1
  13   5  -1 2.42683 6.36084   1
 -13   5   1 7.65910 7.53446   3
  12  -5  -1 8.42379 5.23851   1
 -12  -5   1 6.59727 6.47600   2
  12   5  -1 1.26844 5.30929   1
 -12   5   1 3.91361 6.14220   3
  11  -5  -1 -0.8857  4.0659   1
 -11  -5   1 6.20147 5.67958   2
 -11   5   1 -0.6928  5.6170   3
  11   5  -1 -3.9880  4.0694   1
 -10  -5   1 -5.8371  4.1337   2
  10  -5  -1 5.33149 5.67139   1
  10   5  -1 5.81723 5.42729   1
 -10   5   1 13.2569  7.0782   3
  -9  -5   1 17.9961  6.8821   2
   9  -5  -1 16.1891  5.7986   1
   9   5  -1 25.5799  6.6281   1
  -9   5   1 25.0897  4.8309   2
   8  -5  -1 51.6187  8.6771   1
  -8  -5   1 66.5607 10.5459   2
  -8  -5   1 65.7919 10.6431   1
   8   5  -1 39.1272  8.0988   1
  -8   5   1 54.7929  5.9605   2
  -7  -5   1 46.3592  8.6611   1
  -7  -5   1 35.0752  7.7290   2
   7  -5  -1 51.8942  8.6840   1
   7   5  -1 40.2577  4.4670   3
   7   5  -1 25.2592  6.5276   1
  -7   5   1 30.3255  4.7566   2
  -6  -5   1 209.179  14.391   2
  -6  -5   1 205.907  14.561   1
   6  -5  -1 184.312  13.359   1
   6   5  -1 203.056   9.053   3
  -6   5   1 178.232   9.324   2
   6   5  -1 196.568  13.748   1
  -5  -5   1 126.089  12.897   2
   5  -5  -1 111.500  12.125   1
  -5  -5   1 140.456  13.743   1
   5   5  -1 111.845  12.218   1
   5   5  -1 123.997   7.713   3
  -5   5   1 121.169   7.749   2
   4  -5  -1 580.929  24.212   1
  -4  -5   1 561.955  24.498   1
  -4  -5   1 538.962  23.502   2
   4   5  -1 598.592  20.069   3
  -4   5   1 543.170  19.451   2
  -3  -5   1 7.30921 3.96233   2
  -3  -5   1 11.1124  4.9335   1
   3  -5  -1 2.10189 3.10416   2
   3  -5  -1 9.73593 5.26609   1
   3   5  -1 1.29289 2.59367   3
  -2  -5   1 636.476  24.235   2
   2  -5  -1 661.827  22.738   2
   2  -5  -1 631.936  25.280   1
  -2  -5   1 621.025  25.929   1
   2   5  -1 614.777  22.762   3
   1  -5  -1 15.2923  4.2657   2
  -1  -5   1 28.1753  5.9315   2
   1  -5  -1 34.0396  6.6406   1
  -1  -5   1 23.0451  6.2323   1
   1   5  -1 30.4076  5.8838   3
   0  -5  -1 727.267  27.530   1
   0  -5  -1 734.453  26.269   2
   0  -5   1 752.491  25.423   2
   0  -5   1 693.445  28.080   1
   0   5  -1 751.284  27.108   3
   1  -5   1 8.78272 3.79364   2
   1  -5   1 5.95123 5.73193   1
  -1  -5  -1 9.55189 4.15266   2
  -1  -5  -1 4.38181 4.55461   1
  -1   5  -1 3.05641 3.77406   3
  -2  -5  -1 968.805  33.089   2
   2  -5   1 970.116  34.490   1
   2  -5   1 930.566  29.076   2
  -2  -5  -1 1004.88   34.01   1
  -2   5  -1 976.909  34.503   3
  -3  -5  -1 62.8219  9.0448   2
  -3  -5  -1 57.4168  8.6583   1
   3  -5   1 45.9177  8.4257   1
   3  -5   1 69.0378  6.7439   2
   3   5   1 52.7441  8.2213   1
  -3   5  -1 73.7898 10.3473   3
   4  -5   1 695.755  27.894   1
  -4  -5  -1 657.164  27.380   2
  -4  -5  -1 731.372  27.911   1
   4   5   1 685.808  27.179   1
  -4   5  -1 715.129  29.006   3
  -5  -5  -1 238.792  15.262   2
  -5  -5  -1 249.565  15.421   1
   5  -5   1 220.399  14.815   1
   5   5   1 238.928  14.594   1
  -5   5  -1 232.707   9.870   2
  -5   5  -1 256.159  16.430   3
   6  -5   1 54.6264  9.0863   1
  -6  -5  -1 63.4769  9.7768   1
  -6  -5  -1 62.2284 10.1315   2
  -6   5  -1 55.0796  5.1551   2
   6   5   1 55.4954  8.6243   1
  -6   5  -1 59.5869 10.2777   3
   7  -5   1 40.5857  8.5779   1
  -7  -5  -1 35.8563  8.6029   2
  -7   5  -1 74.1066 11.4917   3
  -7   5  -1 52.8979  4.9845   2
   7   5   1 37.0337  7.3437   1
  -8  -5  -1 160.288  16.184   2
   8  -5   1 119.578  14.037   1
  -8   5  -1 162.137  17.098   3
   8   5   1 145.636  13.989   1
  -9  -5  -1 21.9053  8.4015   2
   9  -5   1 11.7513  6.0699   1
   9   5   1 29.8889  7.6861   1
  -9   5  -1 15.3439  7.4179   3
  10  -5   1 7.33826 5.53274   1
 -10  -5  -1 22.2408  7.7867   2
  10   5   1 22.8813  6.7882   1
 -10   5  -1 15.9066  7.6193   3
  11  -5   1 49.9805 10.0871   1
 -11  -5  -1 38.5385  9.3519   2
  11   5   1 47.8794  9.8168   1
 -11   5  -1 31.4986  9.4586   3
 -12  -5  -1 -7.1077  5.9508   2
  12  -5   1 2.66257 5.55092   1
 -12   5  -1 -7.9579  5.1076   3
  12   5   1 3.22867 5.82942   1
 -13  -5  -1 15.2598  7.9560   2
  13  -5   1 20.5326  8.0017   1
  13   5   1 13.6730  7.2334   1
 -13   5  -1 7.46237 6.93827   3
 -14  -5  -1 24.0847  9.3946   2
  14  -5   1 8.18236 6.74807   1
  14   5   1 13.9070  8.9083   1
 -14   5  -1 8.37048 7.73008   3
 -15  -5  -1 -4.3418  6.2605   2
  15  -5   1 -0.0417  6.1191   1
 -15   5  -1 1.90620 6.38683   3
  15   5   1 5.97800 7.46114   1
 -16  -5  -1 86.1690 16.2941   2
  16  -5   1 64.2575 14.0299   1
 -16   5  -1 62.0136 13.7416   3
  16   5   1 39.4429 11.9035   1
 -17  -5  -1 24.5288 10.7384   2
  17  -5   1 17.7418  8.6164   1
 -17   5  -1 11.8439 11.4239   3
  17   5   1  3.2961 10.4611   1
  18  -5   1 35.3852 10.9900   1
 -18  -5  -1 44.0053 12.9175   2
 -18   5  -1 31.4471 11.5409   3
  18   5   1 35.3760 13.2521   1
  19  -5   1 6.65935 7.78325   1
 -19  -5  -1 -0.1226  7.9389   2
 -19   5  -1 -5.3347  8.2266   3
  19   5   1 24.3618 12.0531   1
 -20  -5  -1 41.5418 13.8406   2
  20  -5   1 10.8206  9.2570   1
  20   5   1 14.7995 11.9594   1
 -20   5  -1 27.9472 12.6804   3
  21  -5   1 -1.2833  8.5571   1
 -21  -5  -1 35.6790 13.5668   2
  21   5   1 -13.241   9.318   1
 -21   5  -1  0.7866 12.4802   3
 -22  -5  -1 16.2616 13.3020   2
  22  -5   1 14.5869 10.5727   1
  22   5   1 -4.5624 10.1201   1
 -22   5  -1 12.1235 12.7555   3
  23  -5   1 -0.2510 10.3062   1
 -23  -5  -1 19.5197 12.9829   2
  23   5   1  2.3703 11.8843   1
 -23   5  -1 -13.220  12.118   3
  24  -5   1 15.5379 10.6263   1
 -24  -5  -1 -0.4085 13.8067   2
 -24   5  -1  5.3427 13.9959   3
  24   5   1  8.2240 15.1707   1
  24  -6  -1 17.3905 12.2042   1
 -24  -6   1 29.3103 16.3090   2
  24   6  -1 -5.4399 13.0305   1
 -24   6   1 -2.3496 11.4989   3
 -23  -6   1 -1.3239 10.6909   2
  23  -6  -1  4.9099 10.1526   1
  23   6  -1 -3.3291 12.2948   1
 -23   6   1  6.1810 12.2409   3
 -22  -6   1 -14.461  11.435   2
  22  -6  -1 3.19537 9.90041   1
 -22   6   1 -3.4361 10.9408   3
  22   6  -1 -14.844   8.920   1
  21  -6  -1 -2.4102  6.9629   1
 -21  -6   1 -6.5586 11.7412   2
  21   6  -1 -1.9087 10.6829   1
 -21   6   1 -7.0734  9.5816   3
  20  -6  -1 3.91739 7.77857   1
 -20  -6   1 5.00234 9.55370   2
  20   6  -1 -6.5827  8.7418   1
 -20   6   1 -3.7176  8.4410   3
  19  -6  -1 4.54933 6.16743   1
 -19  -6   1 -3.2323  8.4584   2
 -19   6   1  5.3993 10.1564   3
  19   6  -1 1.58222 8.59715   1
  18  -6  -1 8.55637 6.89260   1
 -18  -6   1 18.1358 10.5702   2
  18   6  -1 17.1679 10.1613   1
 -18   6   1 24.4215 11.6851   3
 -17  -6   1 0.65850 8.70790   2
  17  -6  -1 2.18160 7.34378   1
 -17   6   1 11.0258  9.0883   3
  17   6  -1 -0.0544  8.0357   1
  16  -6  -1 29.8436 10.5364   1
 -16  -6   1 42.7833 13.0861   2
 -16   6   1 37.9137 12.9608   3
  16   6  -1 39.1493 11.1651   1
 -15  -6   1 3.94878 7.40222   2
  15  -6  -1 0.28009 6.68000   1
 -15   6   1 2.75966 7.99419   3
  15   6  -1 2.25096 6.67087   1
 -14  -6   1 130.042  19.710   2
  14  -6  -1 162.891  19.414   1
  14   6  -1 160.471  19.363   1
 -14   6   1 135.385  19.402   3
  13  -6  -1 -7.0500  5.6592   1
 -13  -6   1 -7.3120  5.4216   2
 -13   6   1 11.1389  8.7782   3
  13   6  -1 -1.6720  6.3961   1
  12  -6  -1 189.348  19.422   1
 -12  -6   1 139.105  18.010   2
 -12   6   1 147.934  19.493   3
  12   6  -1 185.411  18.854   1
  11  -6  -1 10.6775  5.8260   1
 -11  -6   1 2.80679 6.74870   2
  11   6  -1 7.22559 6.25460   1
 -11   6   1 9.72839 7.45650   3
  10  -6  -1 211.902  19.734   1
 -10  -6   1 217.684  21.569   2
 -10   6   1 218.860  22.023   3
  10   6  -1 179.131  18.407   1
  -9  -6   1 70.4253 12.2838   2
   9  -6  -1 84.5733 12.8152   1
  -9   6   1 85.5261 14.6669   3
   9   6  -1 71.1363 11.2930   1
  -8  -6   1 383.849  22.608   1
  -8  -6   1 373.882  22.658   2
   8  -6  -1 407.239  22.295   1
   8   6  -1 384.484  21.474   1
   7  -6  -1 -3.8874  3.1777   1
  -7  -6   1 3.44786 5.82152   2
  -7  -6   1 -1.8773  3.9511   1
  -7   6   1 -0.3350  2.8921   2
   7   6  -1 0.77964 4.24676   1
   6  -6  -1 264.699  16.907   1
  -6  -6   1 219.155  16.187   1
  -6  -6   1 231.225  16.495   2
   6   6  -1 231.110  16.225   1
  -6   6   1 219.964  11.269   2
  -5  -6   1 16.9923  6.3359   1
   5  -6  -1 6.04583 5.53404   1
  -5  -6   1 14.9554  6.6493   2
   5   6  -1 6.26399 5.41632   1
   5   6  -1 11.9620  4.2432   3
  -5   6   1 15.0029  4.0509   2
   4  -6  -1 197.872  14.492   1
  -4  -6   1 185.314  16.931   1
  -4  -6   1 184.160  14.040   2
   4   6  -1 187.359  11.346   3
   3  -6  -1 18.4514  5.2857   2
   3  -6  -1 12.9561  5.6149   1
  -3  -6   1 20.6188  7.0496   1
  -3  -6   1 8.54889 4.53746   2
   3   6  -1 9.95029 4.59431   3
   2  -6  -1 89.4139  9.8803   2
  -2  -6   1 75.6316 11.2533   1
  -2  -6   1 81.2892 10.0130   2
   2  -6  -1 99.1602 12.0422   1
   2   6  -1 92.1086 10.0019   3
   1  -6  -1 12.8807  5.4445   1
   1  -6  -1 3.19226 3.51419   2
  -1  -6   1 0.45000 4.00104   2
  -1  -6   1 0.56307 5.47340   1
   1   6  -1 -2.4458  2.7140   3
   0  -6   1 22.8933  5.7399   2
   0  -6  -1 25.6146  6.4817   2
   0  -6  -1 35.0650  7.8770   1
   0  -6   1 33.1777  7.9378   1
   0   6  -1 24.8966  7.2771   3
  -1  -6  -1 3.48585 4.60371   2
   1  -6   1 2.81972 4.83727   1
   1  -6   1 -0.8591  3.5424   2
  -1  -6  -1 7.47007 5.56953   1
  -1   6  -1 -2.7243  4.5569   3
   2  -6   1 176.131  16.268   1
   2  -6   1 123.554  10.644   2
  -2  -6  -1 95.9627 12.1399   1
  -2  -6  -1 134.458  13.437   2
  -2   6  -1 146.105  14.678   3
  -3  -6  -1 68.7102 10.3587   2
  -3  -6  -1 49.3838  9.4095   1
   3  -6   1 3.30995 4.32339   1
  -3   6  -1 2.27921 5.05725   3
  -4  -6  -1 251.567  16.294   2
  -4  -6  -1 225.240  15.779   1
   4  -6   1 202.168  10.887   2
   4  -6   1 248.388  17.198   1
  -4   6  -1 210.275  15.796   3
   4   6   1 232.581  15.680   1
   5  -6   1 4.72074 4.47319   1
  -5  -6  -1 3.19876 4.92247   2
  -5  -6  -1 0.99001 4.39937   1
   5   6   1 6.49125 5.00589   1
  -5   6  -1 1.23673 5.11283   3
  -5   6  -1 5.94670 3.16309   2
  -6  -6  -1 229.482  16.593   1
   6  -6   1 228.902  17.075   1
  -6  -6  -1 247.307  17.108   2
   6   6   1 240.114  15.833   1
  -6   6  -1 234.616  17.737   3
  -7  -6  -1 21.3774  7.3070   2
  -7  -6  -1 19.5460  7.0624   1
   7  -6   1 39.0154  8.5875   1
   7   6   1 40.1361  8.2884   1
  -7   6  -1 44.2241 10.3842   3
  -8  -6  -1 435.854  24.571   2
   8  -6   1 447.474  24.200   1
  -8   6  -1 428.524  25.328   3
   8   6   1 460.063  23.084   1
  -9  -6  -1 35.3992  8.9971   2
   9  -6   1 31.0860  8.7505   1
   9   6   1 26.4648  7.4638   1
  -9   6  -1 24.5616  8.9005   3
 -10  -6  -1 437.616  25.795   2
  10  -6   1 423.680  24.281   1
  10   6   1 427.757  24.278   1
 -10   6  -1 460.277  27.134   3
 -11  -6  -1 18.0847  8.5465   2
  11  -6   1 20.9826  7.3522   1
 -11   6  -1 12.3357  8.2103   3
  11   6   1 2.62598 5.65040   1
 -12  -6  -1 323.321  23.703   2
  12  -6   1 371.729  23.500   1
  12   6   1 342.308  22.591   1
 -12   6  -1 349.923  24.928   3
 -13  -6  -1 15.8601  8.8251   2
  13  -6   1 11.9262  7.5292   1
  13   6   1 13.2094  8.0930   1
 -13   6  -1 10.3465  9.1222   3
 -14  -6  -1 126.456  18.748   2
  14  -6   1 90.3627 15.1677   1
  14   6   1 126.798  17.223   1
 -14   6  -1 68.3791 14.5708   3
 -15  -6  -1 5.98398 8.06650   2
  15  -6   1 -3.9680  6.7241   1
  15   6   1 -3.7281  6.3113   1
 -15   6  -1 1.42457 8.03897   3
 -16  -6  -1 89.0721 17.0250   2
  16  -6   1 107.428  17.610   1
 -16   6  -1 58.3203 15.3375   3
  16   6   1 53.1362 13.3780   1
  17  -6   1 -4.1437  5.8490   1
 -17  -6  -1 3.36219 8.46359   2
 -17   6  -1 2.30616 9.19548   3
  17   6   1 -0.6721  7.5531   1
  18  -6   1 32.4397 12.2076   1
 -18  -6  -1 21.3064 12.1577   2
 -18   6  -1  1.9689 10.8594   3
  18   6   1 12.2639  9.6034   1
 -19  -6  -1 3.90870 9.43001   2
  19  -6   1 6.85180 7.98161   1
  19   6   1  6.3769 10.1918   1
 -19   6  -1  6.4722 10.8625   3
 -20  -6  -1 -3.8426  9.1709   2
  20  -6   1 -2.4082  8.5078   1
  20   6   1 -0.0262 10.2514   1
 -20   6  -1 -9.6144  8.9421   3
 -21  -6  -1 -10.950   9.232   2
  21  -6   1 6.05043 8.69809   1
 -21   6  -1  7.4173 12.8896   3
  21   6   1 -3.8601  9.9980   1
 -22  -6  -1 13.9005 12.2533   2
  22  -6   1 26.0286 13.0697   1
  22   6   1 -5.1882 11.6228   1
 -22   6  -1 -2.2600 13.5771   3
 -23  -6  -1  1.0524 11.9638   2
  23  -6   1 -3.4528  9.4716   1
  23   6   1 -9.1713 11.2829   1
 -23   6  -1 -10.722  11.629   3
  22  -7  -1 11.7074 10.6701   1
 -22  -7   1 20.0888 14.0305   2
 -22   7   1  2.5073 12.3795   3
  22   7  -1  8.5131 14.4587   1
 -21  -7   1  1.3193 10.9369   2
  21  -7  -1 -1.2259  8.0458   1
 -21   7   1 -13.829   8.734   3
  21   7  -1 -18.443  10.183   1
 -20  -7   1  0.3001 10.7356   2
  20  -7  -1 39.6915 12.6750   1
  20   7  -1 12.1811 13.5317   1
 -20   7   1 28.6886 14.4168   3
  19  -7  -1 -3.3154  7.5996   1
 -19  -7   1 11.0057 10.7615   2
 -19   7   1 -0.4965 10.2634   3
  19   7  -1 14.6179 10.8621   1
 -18  -7   1 22.2794 11.4811   2
  18  -7  -1 21.0343 10.6545   1
 -18   7   1 30.2462 12.7107   3
  18   7  -1 38.7547 14.2406   1
 -17  -7   1 -2.0277  8.1786   2
  17  -7  -1 -9.1717  6.8662   1
 -17   7   1 3.52212 9.49857   3
  17   7  -1 -8.2878  6.8251   1
  16  -7  -1 26.1322 10.9898   1
 -16  -7   1 11.9991  9.4703   2
  16   7  -1 34.5332 11.2889   1
 -16   7   1 44.7063 14.1338   3
  15  -7  -1 15.9943  8.0986   1
 -15  -7   1 -1.3520  7.0455   2
  15   7  -1 3.03825 6.42623   1
 -15   7   1 1.34947 7.19143   3
 -14  -7   1 11.6592  8.5473   2
  14  -7  -1 16.8827  8.0160   1
  14   7  -1 4.66679 7.63320   1
 -14   7   1 16.0737  9.4326   3
  13  -7  -1 4.39434 6.66588   1
 -13  -7   1 13.7770  8.9805   2
  13   7  -1 3.92019 8.00513   1
 -13   7   1 5.85752 9.47345   3
  12  -7  -1 15.3699  7.6106   1
 -12  -7   1 5.32108 7.20240   2
  12   7  -1 4.36316 7.30024   1
 -12   7   1 18.9486 10.0487   3
  11  -7  -1 25.4530  8.9863   1
 -11  -7   1 32.3150 11.2518   2
 -11   7   1 14.2806  9.1565   3
  11   7  -1 2.63785 5.97581   1
 -10  -7   1 60.6645 12.5232   2
  10  -7  -1 64.4645 12.1400   1
 -10   7   1 37.9340 11.0737   3
  10   7  -1 42.0616  9.9567   1
  -9  -7   1 8.03267 6.90310   2
  -9  -7   1 2.37288 6.78212   1
   9  -7  -1 5.68552 6.35322   1
   9   7  -1 8.24939 6.60960   1
  -9   7   1 -3.2435  5.6024   3
  -8  -7   1 71.9334 12.7045   1
   8  -7  -1 67.8045 12.1974   1
  -8  -7   1 45.2992 10.3857   2
  -8   7   1 72.6590 13.9060   3
   8   7  -1 99.0444 14.0427   1
  -7  -7   1 13.6162  6.7042   2
  -7  -7   1 5.25517 5.87320   1
   7  -7  -1 3.80412 6.05443   1
   7   7  -1 11.3117  6.9167   1
  -7   7   1 6.78108 7.12776   3
  -6  -7   1 88.9581 12.7845   2
  -6  -7   1 73.6533 12.3483   1
   6  -7  -1 77.8078 12.7207   1
   6   7  -1 102.204  14.494   1
   5  -7  -1 1.34317 5.89577   1
  -5  -7   1 0.85665 4.85218   1
  -5  -7   1 4.20058 5.44037   2
  -5   7   1 4.09685 3.73050   2
   5   7  -1 -0.9305  4.1628   1
  -4  -7   1 178.754  18.667   1
   4  -7  -1 171.973  17.511   1
  -4  -7   1 180.510  17.065   2
   4   7  -1 166.094  11.615   3
  -3  -7   1 0.77191 4.22288   2
   3  -7  -1 -2.2076  3.4537   2
  -3  -7   1 -2.1293  4.5344   1
   3  -7  -1 1.05184 4.85978   1
   3   7  -1 -1.9534  3.3292   3
   2  -7  -1 308.034  19.766   1
   2  -7  -1 348.925  17.619   2
  -2  -7   1 406.873  22.952   1
  -2  -7   1 313.849  18.430   2
   2   7  -1 340.512  18.195   3
  -1  -7   1 3.14336 4.55790   2
  -1  -7   1 -8.0044  5.4975   1
   1  -7  -1 1.35943 5.55753   1
   1  -7  -1 5.68495 4.27816   2
   1   7  -1 6.78720 4.86482   3
   0  -7  -1 483.854  24.776   1
   0  -7   1 461.966  21.480   2
   0  -7   1 494.784  25.744   1
   0  -7  -1 447.324  21.614   2
   0   7  -1 460.666  23.040   3
  -1  -7  -1 0.29183 4.90480   1
   1  -7   1 14.3471  6.9899   1
  -1  -7  -1 3.90151 4.86925   2
   1  -7   1 7.86643 4.27242   2
  -1   7  -1 5.55708 5.76013   3
  -2  -7  -1 262.741  18.217   1
   2  -7   1 261.305  14.470   2
   2  -7   1 251.909  18.413   1
  -2  -7  -1 247.354  16.364   2
  -2   7  -1 233.818  17.310   3
  -3  -7  -1 2.31908 4.78701   1
   3  -7   1 -6.3882  3.8676   1
   3  -7   1 0.99669 3.36678   2
  -3  -7  -1 0.04067 3.60333   2
  -3   7  -1 2.69408 4.75483   3
   4  -7   1 191.255  18.905   1
  -4  -7  -1 208.513  18.934   2
  -4  -7  -1 189.235  18.441   1
   4   7   1 210.627  18.887   1
  -4   7  -1 144.247  16.853   3
   5  -7   1 -2.6670  4.8485   1
  -5  -7  -1 22.6114  7.6283   2
  -5  -7  -1 9.52480 6.32950   1
   5   7   1 13.8078  6.2259   1
  -5   7  -1 3.66380 5.74354   3
  -6  -7  -1 52.0640 10.4874   2
  -6  -7  -1 66.0101 11.4990   1
   6  -7   1 64.3309 11.9394   1
  -6   7  -1 69.4899 12.5912   3
   6   7   1 61.5886 10.7586   1
   7  -7   1 0.87600 4.26450   1
  -7  -7  -1 -3.3410  4.9019   1
  -7  -7  -1 3.25838 5.54066   2
  -7   7  -1 3.17113 7.31490   3
   7   7   1 -0.8859  4.7846   1
  -8  -7  -1 60.9060 12.0852   2
  -8  -7  -1 86.9681 14.2667   1
   8  -7   1 26.3019  9.0740   1
   8   7   1 74.0640 11.9884   1
  -8   7  -1 61.2668 12.3733   3
   9  -7   1 10.7345  7.7052   1
  -9  -7  -1 -3.5714  5.2459   2
   9   7   1 5.90589 6.38674   1
  -9   7  -1 4.29271 7.35152   3
  10  -7   1 39.7545 10.7408   1
 -10  -7  -1 29.1533  9.7464   2
 -10   7  -1 35.6722 11.2561   3
  10   7   1 45.6930 10.3800   1
  11  -7   1 2.21961 6.31111   1
 -11  -7  -1 13.8697  7.9043   2
 -11   7  -1 3.49816 8.13533   3
  11   7   1 -3.3494  5.7718   1
 -12  -7  -1 -5.7490  5.2884   2
  12  -7   1 -6.9277  4.9892   1
  12   7   1 2.37600 6.82110   1
 -12   7  -1 7.09325 8.56284   3
 -13  -7  -1 -2.6695  5.7475   2
  13  -7   1 -5.1165  5.5784   1
 -13   7  -1 -2.3263  6.6707   3
  13   7   1 -9.2060  5.3964   1
  14  -7   1 22.3651  9.0667   1
 -14  -7  -1 5.85781 7.79629   2
  14   7   1 8.14185 7.89188   1
 -14   7  -1 13.5972  9.5417   3
  15  -7   1 7.64515 7.14447   1
 -15  -7  -1  0.7254 10.2884   2
 -15   7  -1 -7.0408  7.0275   3
  15   7   1 0.36992 7.75648   1
 -16  -7  -1 18.3372 11.9629   2
  16  -7   1 13.9425  8.6839   1
  16   7   1 18.7552  9.9936   1
 -16   7  -1 17.0117 11.0709   3
 -17  -7  -1 -2.1735  7.6111   2
  17  -7   1 2.55300 7.21536   1
  17   7   1 -1.3443  9.5449   1
 -17   7  -1 -11.760   8.533   3
  18  -7   1 21.0212 11.5492   1
 -18  -7  -1 35.9484 14.1541   2
  18   7   1 23.4714 11.8893   1
 -18   7  -1 23.2683 13.3883   3
  19  -7   1 -3.1819  7.7261   1
 -19  -7  -1 -9.1159 10.0793   2
  19   7   1  4.8718 10.4453   1
 -19   7  -1 -2.2594 10.2831   3
  20  -7   1 13.3074 11.0737   1
 -20  -7  -1  3.5604 11.8970   2
  20   7   1 25.9299 16.6074   1
 -20   7  -1 13.6662 12.6871   3
  21  -7   1  1.0142 10.0156   1
 -21  -7  -1 11.6756 11.6014   2
 -21   7  -1 -18.555   9.771   3
  21   7   1 -9.8594 12.9127   1
  22  -7   1 13.6832 12.4331   1
 -22  -7  -1 13.6046 13.3913   2
 -22   7  -1 24.8512 16.3980   3
  22   7   1 14.5767 15.4070   1
 -21  -8   1 -5.9608 11.1617   2
  21  -8  -1  5.9112 10.5887   1
  21   8  -1 -0.7313 11.3803   1
 -21   8   1 -5.4203 10.3376   3
 -20  -8   1 -6.1733  9.4906   2
  20  -8  -1  0.4363 10.7954   1
 -20   8   1  0.9366 12.6134   3
  20   8  -1  5.8726 10.8235   1
 -19  -8   1 23.4162 14.5609   2
  19  -8  -1 7.68335 9.31350   1
  19   8  -1 -7.6635 11.4614   1
 -19   8   1 23.1916 12.2003   3
  18  -8  -1 4.75494 9.69059   1
 -18  -8   1 8.52780 9.61319   2
  18   8  -1 17.6929 10.8377   1
 -18   8   1 35.5150 14.4539   3
 -17  -8   1 3.19546 9.05201   2
  17  -8  -1 8.66561 9.64181   1
 -17   8   1  8.4997 10.5724   3
  17   8  -1 23.3990 12.5915   1
  16  -8  -1 9.44233 8.18727   1
 -16  -8   1 -5.1487  7.7062   2
  16   8  -1 11.0577  9.5703   1
 -16   8   1 4.73063 9.51344   3
  15  -8  -1 -2.2146  8.1835   1
 -15  -8   1 6.66685 8.08255   2
 -15   8   1 12.5638 11.2148   3
  15   8  -1 -4.9109  7.4372   1
  14  -8  -1 35.9653 12.0389   1
 -14  -8   1 47.9655 13.6932   2
  14   8  -1 55.3316 13.3892   1
 -14   8   1 25.0473 11.6195   3
  13  -8  -1 6.23855 7.63179   1
 -13  -8   1 13.4469  9.8403   2
 -13   8   1 -3.8068  7.1269   3
  13   8  -1 -10.978   7.557   1
 -12  -8   1 86.5908 15.8363   2
  12  -8  -1 123.512  17.904   1
  12   8  -1 104.032  16.310   1
 -12   8   1 72.5990 15.5900   3
 -11  -8   1 18.1497  9.2036   2
  11  -8  -1 21.9725  9.5714   1
 -11   8   1 1.31889 8.40172   3
  11   8  -1 -7.2584  7.3475   1
  10  -8  -1 217.474  22.248   1
 -10  -8   1 190.872  22.998   2
 -10   8   1 203.608  23.923   3
  10   8  -1 214.291  21.348   1
  -9  -8   1 21.2514  9.3310   2
  -9  -8   1 14.8670  8.8480   1
   9  -8  -1 21.2384  8.5285   1
  -9   8   1 36.5802 11.8620   3
   9   8  -1 20.2897  8.4752   1
   8  -8  -1 168.951  19.497   1
  -8  -8   1 146.529  18.517   2
  -8  -8   1 169.354  20.686   1
  -8   8   1 208.893  23.375   3
   8   8  -1 173.468  19.572   1
   7  -8  -1 8.17345 7.87868   1
  -7  -8   1 6.99586 6.89000   1
  -7  -8   1 23.5785  9.1162   2
   7   8  -1 13.3322  8.2299   1
  -7   8   1 12.0625  7.6975   3
  -6  -8   1 64.9431 13.1204   1
   6  -8  -1 53.3530 11.3259   1
  -6  -8   1 51.9596 11.6799   2
  -6   8   1 41.5651 11.5779   3
   6   8  -1 43.3091 11.1488   1
   5  -8  -1 2.32121 6.12295   1
  -5  -8   1 4.24740 6.82087   2
  -5  -8   1 24.7799  8.6026   1
   5   8  -1 15.6509  7.6385   1
  -5   8   1 15.6329  7.4055   3
  -4  -8   1 60.0504 11.5001   2
   4  -8  -1 45.7564 10.1956   1
  -4  -8   1 61.2462 12.2730   1
  -4   8   1 55.1588 11.6346   3
  -3  -8   1 -0.4329  5.3415   1
  -3  -8   1 -0.2728  4.2834   2
   3  -8  -1 1.35983 5.94622   1
  -3   8   1 -2.5158  5.9433   3
   2  -8  -1 75.0149 10.3516   2
  -2  -8   1 46.8745 11.0980   1
  -2  -8   1 73.8889 11.1690   2
   2  -8  -1 69.4253 11.9503   1
   2   8  -1 62.7676 10.1888   3
  -2   8   1 66.9714 11.9439   3
   1  -8  -1 0.14359 5.11086   1
  -1  -8   1 -2.3792  5.1803   1
  -1  -8   1 6.06411 5.16695   2
   1  -8  -1 -2.8266  4.2264   2
   1   8  -1 2.06624 5.31822   3
   0  -8  -1 9.46949 6.06288   1
   0  -8  -1 25.8779  7.5504   2
   0  -8   1 17.9958  6.4025   2
   0  -8   1 21.5663  8.2361   1
   0   8  -1 29.5942  8.6489   3
   1  -8   1 -0.5231  4.9388   1
  -1  -8  -1 -2.6293  3.3299   2
   1  -8   1 -3.8888  3.8322   2
  -1  -8  -1 3.70008 6.16157   1
  -1   8  -1 4.56261 5.35767   3
   2  -8   1 2.83073 5.87078   1
  -2  -8  -1 -8.6159  4.3385   2
  -2  -8  -1 16.1959  7.7067   1
  -2   8  -1 4.06316 6.48688   3
   2   8   1 5.58899 5.30778   3
  -3  -8  -1 -3.8749  5.5868   2
   3  -8   1 7.94218 6.80549   1
  -3  -8  -1 6.54153 6.19468   1
  -3   8  -1 1.69330 5.75767   3
   3   8   1 4.46348 5.66004   1
   4  -8   1 39.7070 11.0047   1
  -4  -8  -1 51.3475 10.8523   2
  -4  -8  -1 46.7002 10.3336   1
  -4   8  -1 56.6583 12.2519   3
   4   8   1 61.8459 11.4767   1
   5  -8   1 -2.2774  6.8001   1
  -5  -8  -1 2.96045 6.32326   2
  -5  -8  -1 10.2556  6.8304   1
   5   8   1 3.14038 5.62854   1
  -5   8  -1 -4.1442  5.1376   3
  -6  -8  -1 52.3585 11.2118   1
   6  -8   1 31.7644 10.5214   1
  -6  -8  -1 64.6917 12.4220   2
  -6   8  -1 78.3788 14.6138   3
   6   8   1 58.3122 11.7303   1
   7  -8   1 -1.2406  5.4366   1
  -7  -8  -1 3.60533 6.24880   2
  -7  -8  -1 1.02442 5.53270   1
  -7   8  -1 11.6737  8.1897   3
   7   8   1 -1.8939  5.3502   1
  -8  -8  -1 139.194  18.400   2
   8  -8   1 131.448  17.992   1
  -8  -8  -1 147.015  19.177   1
   8   8   1 157.682  18.148   1
  -8   8  -1 159.003  20.806   3
   9  -8   1 7.93210 7.37157   1
  -9  -8  -1 6.09899 7.10037   2
  -9   8  -1 5.58357 8.18771   3
   9   8   1 5.58349 7.43705   1
  10  -8   1 171.775  20.790   1
 -10  -8  -1 172.133  21.023   2
 -10   8  -1 199.861  24.605   3
  10   8   1 164.069  19.541   1
  11  -8   1 -2.4438  6.3384   1
 -11  -8  -1 5.32259 8.31586   2
  11   8   1 -3.9684  6.0635   1
 -11   8  -1 12.9792  9.1243   3
 -12  -8  -1 24.7759 11.2628   2
  12  -8   1 77.9678 15.3317   1
 -12   8  -1 56.3982 14.8161   3
  12   8   1 69.7699 14.7364   1
 -13  -8  -1 4.26835 7.99703   2
  13  -8   1 1.47844 6.71298   1
  13   8   1 1.22616 7.28470   1
 -13   8  -1 -3.5278  9.6740   3
  14  -8   1 31.5700 10.9772   1
 -14  -8  -1 22.4535 10.4025   2
 -14   8  -1 20.6280 10.9108   3
  14   8   1 34.4046 11.8500   1
  15  -8   1 -6.2972  6.8536   1
 -15  -8  -1 -4.1369  7.8697   2
 -15   8  -1 6.65744 9.98378   3
  15   8   1 3.23786 9.11347   1
  16  -8   1 21.1971 11.5057   1
 -16  -8  -1 17.9537 12.2295   2
  16   8   1 11.3999 10.3869   1
 -16   8  -1  6.9553 10.5883   3
 -17  -8  -1  9.1952 11.9457   2
  17  -8   1 0.37463 7.27256   1
 -17   8  -1  0.5142 12.5218   3
  17   8   1 0.19412 8.84973   1
 -18  -8  -1 13.4181 12.5360   2
  18  -8   1 -3.4507  8.5164   1
  18   8   1 7.92786 9.75149   1
 -18   8  -1 15.0262 12.8530   3
 -19  -8  -1  2.2431 10.7544   2
  19  -8   1 -4.7110 10.6483   1
  19   8   1 1.06626 9.56100   1
 -19   8  -1 -4.7196 11.0812   3
 -20  -8  -1 14.0965 15.3420   2
  20  -8   1 2.48132 9.06462   1
  20   8   1 -17.497   9.272   1
 -20   8  -1 -5.8307 13.3284   3
 -19  -9   1 21.8772 13.1291   2
 -19   9   1 -4.4491 10.9506   3
  19   9  -1 -2.4589 10.5667   1
  18  -9  -1 16.2161 13.6864   1
 -18  -9   1 19.2697 14.0226   2
 -18   9   1  7.9719 10.6810   3
  18   9  -1 25.5392 14.3311   1
  17  -9  -1 18.9160 11.7783   1
 -17  -9   1 -10.366  10.107   2
  17   9  -1 5.99669 9.21657   1
 -17   9   1 -0.2083 12.0085   3
  16  -9  -1  2.9274 10.5031   1
 -16  -9   1 11.9134 12.7789   2
  16   9  -1 -5.2577  8.0392   1
 -16   9   1  5.1572 10.4986   3
 -15  -9   1 -3.2807 10.3077   2
  15  -9  -1 5.43720 9.73673   1
 -15   9   1 -7.5147  8.3529   3
  15   9  -1  8.8113 11.2507   1
  14  -9  -1 13.3547  9.5927   1
 -14  -9   1 1.93414 8.14302   2
 -14   9   1 12.8193 10.8322   3
  14   9  -1 -2.6152  7.3013   1
  13  -9  -1 -8.5141  7.4326   1
 -13  -9   1 -3.4925  7.6952   2
  13   9  -1 -5.9184  6.5823   1
 -13   9   1 5.79487 9.42251   3
 -12  -9   1 16.6544 11.6621   2
  12  -9  -1 3.75648 8.30972   1
  12   9  -1 -2.0489  8.8697   1
 -12   9   1 1.73496 9.88193   3
  11  -9  -1 -4.9611  6.3044   1
 -11  -9   1 0.40232 7.62185   2
 -11   9   1 -3.4013  7.2618   3
  11   9  -1 13.3780  9.1003   1
  10  -9  -1 -2.7868  6.5467   1
 -10  -9   1 2.99245 7.66489   2
 -10   9   1 8.50386 9.32036   3
  10   9  -1 2.13177 6.31211   1
  -9  -9   1 3.97120 7.67649   1
  -9  -9   1 5.57867 7.04472   2
   9  -9  -1 3.24324 8.09516   1
   9   9  -1 5.68438 7.35337   1
  -9   9   1 0.27175 6.95985   3
  -8  -9   1 10.4512  7.6574   2
  -8  -9   1 2.55936 7.86405   1
   8  -9  -1 16.5671  9.5236   1
  -8   9   1 19.6944 10.2949   3
   8   9  -1 -2.1352  5.7326   1
  -7  -9   1 6.22932 8.55254   1
   7  -9  -1 9.02951 7.55453   1
  -7  -9   1 2.50707 7.92938   2
   7   9  -1 0.49408 6.80874   1
  -7   9   1 11.4017  9.1369   3
   6  -9  -1 38.8125 10.7886   1
  -6  -9   1 30.2204 10.2462   2
  -6  -9   1 35.7141 11.1330   1
  -6   9   1 34.9150 11.2687   3
   6   9  -1 34.9512 11.1701   1
   5  -9  -1 47.2744 12.3985   1
  -5  -9   1 53.8548 12.7083   2
  -5  -9   1 52.5677 11.8850   1
  -5   9   1 31.8409 10.2684   3
   5   9  -1 36.8530 10.7273   1
   4  -9  -1 93.7576 15.6633   1
  -4  -9   1 78.7297 14.4646   1
  -4  -9   1 66.6312 13.1717   2
   4   9  -1 70.6003 13.2866   1
  -4   9   1 88.5297 14.5044   3
   3  -9  -1 68.7135 13.0432   1
  -3  -9   1 65.2112 13.3544   1
  -3  -9   1 46.6204 10.8306   2
  -3   9   1 48.1318 12.3120   3
   2  -9  -1 113.745  16.310   1
  -2  -9   1 138.164  16.552   2
  -2  -9   1 140.831  19.260   1
  -2   9   1 123.475  16.705   3
   1  -9  -1 40.5610 11.3823   1
  -1  -9   1 79.0909 14.6060   1
  -1  -9   1 49.4578  9.9184   2
   1   9  -1 59.8659 11.4926   3
  -1   9   1 65.6382 12.0712   3
   0  -9   1 92.6758 15.8234   1
   0  -9  -1 99.9257 15.2353   1
   0  -9  -1 85.4217 12.8962   2
   0   9  -1 101.932  14.714   3
   0   9   1 71.2047 13.0170   3
  -1  -9  -1 59.1091 12.9320   1
   1  -9   1 88.6063 15.7100   1
  -1  -9  -1 52.5525 10.8430   2
  -1   9  -1 42.4885 10.9532   3
   1   9   1 60.7678 11.5384   3
  -2  -9  -1 87.5957 13.5303   2
   2  -9   1 103.893  16.473   1
  -2  -9  -1 53.6010 12.1010   1
  -2   9  -1 95.9981 14.9704   3
  -3  -9  -1 40.6142 10.0761   2
  -3  -9  -1 28.8983  9.5567   1
   3  -9   1 46.4502 12.0655   1
  -3   9  -1 45.4680 12.0878   3
   3   9   1 37.4691 10.2354   1
  -4  -9  -1 66.8355 12.9220   2
   4  -9   1 46.8226 11.8390   1
  -4  -9  -1 24.0639 10.0368   1
  -4   9  -1 67.0202 14.4187   3
   4   9   1 49.4531 12.3774   1
   5  -9   1 12.9767  8.8242   1
  -5  -9  -1 15.7758  8.0582   1
  -5  -9  -1 32.7848  9.5808   2
  -5   9  -1 3.99292 7.53148   3
   5   9   1 47.9055 11.7624   1
  -6  -9  -1 16.2572  8.3567   1
  -6  -9  -1 29.9971  9.6684   2
   6  -9   1 25.9716 10.0982   1
  -6   9  -1 22.9189 10.5162   3
   6   9   1 17.8298  7.9917   1
  -7  -9  -1 35.3895 10.6475   2
  -7  -9  -1 25.5970 10.0977   1
   7  -9   1 27.0862 10.0567   1
   7   9   1 19.5216  8.4079   1
  -7   9  -1 9.65535 8.50236   3
  -8  -9  -1 -1.4360  7.7167   2
   8  -9   1 -4.8309  5.9005   1
  -8  -9  -1 12.5809  7.9466   1
  -8   9  -1 0.86692 6.74852   3
   8   9   1 -0.1131  5.8133   1
  -9  -9  -1 20.8562 10.2264   2
   9  -9   1 14.2703  9.6058   1
   9   9   1 16.2633  8.4812   1
  -9   9  -1 17.9039 10.8652   3
 -10  -9  -1 11.9769  8.5139   2
  10  -9   1 2.78436 8.95887   1
 -10   9  -1 -2.7342  9.1497   3
  10   9   1 4.69950 8.00817   1
  11  -9   1 -5.3075  7.8315   1
 -11  -9  -1 3.41009 8.33533   2
  11   9   1 5.55623 7.28046   1
 -11   9  -1 -6.2212  7.4233   3
  12  -9   1 0.99812 7.20674   1
 -12  -9  -1 -1.3206  7.5566   2
  12   9   1 -1.8919  8.6941   1
 -12   9  -1 -10.084   8.211   3
 -13  -9  -1 -1.0940  8.8566   2
  13  -9   1 3.71351 8.61559   1
 -13   9  -1 5.61069 9.91029   3
  13   9   1 2.33968 8.35228   1
 -14  -9  -1  7.6997 10.5921   2
  14  -9   1 -4.6359  7.8822   1
  14   9   1 3.36422 9.91057   1
 -14   9  -1 -1.1082  8.6868   3
  15  -9   1  4.5014 10.0222   1
 -15  -9  -1 2.30963 8.92322   2
  15   9   1 5.07316 8.72233   1
 -15   9  -1 -9.5670 11.3035   3
  16  -9   1 19.9386 11.3715   1
 -16  -9  -1 11.6328 12.3877   2
 -16   9  -1  3.4645 12.5687   3
  16   9   1 -8.1809  7.5907   1
 -17  -9  -1 12.0484 12.0684   2
  17  -9   1 4.76373 8.69483   1
  17   9   1 -11.890   8.023   1
 -17   9  -1 -3.9793  9.6365   3
 -18  -9  -1 21.3995 14.9565   2
  18  -9   1 10.1268 10.8890   1
 -18   9  -1 30.4952 17.5803   3
  18   9   1  3.4959 12.9263   1
  19  -9   1  0.9338 10.9693   1
 -19  -9  -1  4.7363 12.5960   2
 -19   9  -1  8.6959 16.4125   3
  19   9   1 -0.6747 11.3766   1
 -17 -10   1  5.0698 11.1903   2
 -17  10   1 12.2680 15.2941   3
  17  10  -1 -9.7522 11.7512   1
 -16 -10   1 10.9810 11.4516   2
 -16  10   1  3.6707 13.6701   3
  16  10  -1 1.54359 9.57257   1
 -15 -10   1  5.8995 11.3528   2
 -15  10   1  1.3193 13.0936   3
  15  10  -1 -6.7019 10.2252   1
 -14 -10   1 10.7742  9.8630   2
  14 -10  -1 1.87121 9.08385   1
 -14  10   1 14.3369 11.5436   3
  14  10  -1 4.15999 9.92752   1
  13 -10  -1 22.6179 11.2953   1
 -13 -10   1  9.9445 10.8797   2
 -13  10   1  8.7759 10.2355   3
  13  10  -1 10.6086 10.1365   1
  12 -10  -1 19.4502 11.5917   1
 -12 -10   1 0.25260 8.97294   2
 -12  10   1 11.6209 11.6632   3
  12  10  -1 26.9931 10.9787   1
  11 -10  -1 22.8648 12.5447   1
 -11 -10   1 3.32151 8.82698   2
 -11  10   1 7.01116 9.92962   3
  11  10  -1 20.3095 10.8692   1
  10 -10  -1 8.86986 8.97517   1
 -10 -10   1 32.4517 11.8029   2
  10  10  -1 7.50477 7.54335   1
 -10  10   1 14.5166 11.1438   3
  -9 -10   1 26.5170 12.3646   1
  -9 -10   1 18.4210 11.8378   2
   9 -10  -1 27.4897 11.7457   1
  -9  10   1 24.0746 11.1129   3
   9  10  -1 31.5050 11.9272   1
   8 -10  -1 19.1500  9.5613   1
  -8 -10   1 31.4021 11.5609   2
  -8 -10   1 22.5765 10.3263   1
  -8  10   1 23.4542 10.7264   3
   8  10  -1 38.0891 11.6202   1
  -7 -10   1 21.6153  9.4320   2
   7 -10  -1 31.6244 12.0031   1
  -7 -10   1 24.3607 10.2594   1
  -7  10   1 20.6505 10.6125   3
   7  10  -1 10.2985  9.9131   1
   6 -10  -1 5.05460 9.02865   1
  -6 -10   1 11.4837  8.9737   1
  -6 -10   1 34.0779  9.8829   2
  -6  10   1 37.5612 11.4675   3
   6  10  -1 20.6397  9.9215   1
  -5 -10   1 8.06674 8.16160   2
   5 -10  -1 16.3057  9.2346   1
  -5 -10   1 3.64040 9.14109   1
  -5  10   1 13.3262 10.0018   3
   5  10  -1 12.4734  9.8312   1
  -4 -10   1 17.8518  8.3018   2
  -4 -10   1 4.62232 7.31382   1
   4 -10  -1 10.1197  7.6449   1
   4  10  -1 5.52084 7.69525   1
  -4  10   1 10.2833  8.3955   3
  -3 -10   1 1.42256 7.36320   1
   3 -10  -1 -3.0336  7.8805   1
  -3  10   1 6.24318 8.51225   3
  -2 -10   1 -9.3285  6.2495   1
   2 -10  -1 -4.7448  7.0483   1
  -2  10   1 4.26196 7.90570   3
   1 -10  -1 0.10288 6.87022   1
  -1 -10   1 -2.4106  7.2925   1
  -1  10   1 3.16240 7.59567   3
   0 -10   1 3.13934 7.27887   1
   0 -10  -1 -7.8916  7.2513   1
  -1 -10  -1 -0.1913  7.2715   1
   1 -10   1 0.71784 9.05758   1
  -1  10  -1 -11.917   4.914   3
  -2 -10  -1 2.22249 8.06896   1
   2 -10   1 -2.1553  7.3225   1
  -2 -10  -1 0.04642 5.59588   2
  -2  10  -1 12.4858  9.4111   3
   3 -10   1 -1.7622  6.2646   1
  -3 -10  -1 1.56700 6.83649   2
  -3 -10  -1 5.56139 7.28912   1
  -3  10  -1 0.88018 6.71445   3
   3  10   1 2.46770 6.58784   1
   4 -10   1 -1.2779  7.4349   1
  -4 -10  -1 -1.0026  6.5476   1
  -4 -10  -1 6.14304 8.59977   2
  -4  10  -1 -0.1306  6.9693   3
   4  10   1 -2.3230  5.9615   1
  -5 -10  -1 8.87702 9.69516   1
  -5 -10  -1 10.8779  7.8532   2
   5 -10   1 19.7415 10.8324   1
  -5  10  -1 24.3771 11.0342   3
   5  10   1 20.7939 10.6404   1
   6 -10   1 1.81282 9.76225   1
  -6 -10  -1 15.2122  9.1485   2
  -6 -10  -1 2.42883 7.98287   1
  -6  10  -1 42.0611 13.2665   3
   6  10   1 7.00160 7.87136   1
  -7 -10  -1 16.4955  9.3760   2
   7 -10   1 21.5096 10.2922   1
  -7 -10  -1 24.7432 11.5505   1
   7  10   1 40.4376 12.2757   1
  -7  10  -1 19.5827 10.4706   3
   8 -10   1 4.59369 9.34135   1
  -8 -10  -1 21.6468 10.5369   1
  -8 -10  -1 13.0111  9.8591   2
  -8  10  -1 9.51655 9.01717   3
   8  10   1 25.5621 10.2079   1
   9 -10   1 30.6070 12.9486   1
  -9 -10  -1 25.9624 11.7132   2
   9  10   1 42.4697 12.2860   1
  -9  10  -1 14.3171 10.3632   3
  10 -10   1  0.9154 10.2598   1
 -10 -10  -1 30.6597 12.2446   2
  10  10   1 -0.2385 10.1460   1
 -10  10  -1 3.39058 9.55522   3
 -11 -10  -1 15.6972  9.4140   2
  11 -10   1 32.2380 12.4161   1
  11  10   1 19.0747 10.7697   1
 -11  10  -1 15.0800 11.0607   3
 -12 -10  -1 14.9207 10.5357   2
  12 -10   1 17.8409 12.1457   1
  12  10   1  7.1372 10.7380   1
 -12  10  -1 26.6496 13.4994   3
  13 -10   1  3.7932 12.6315   1
 -13 -10  -1 19.3462 11.5403   2
 -13  10  -1 32.2996 14.6742   3
  13  10   1  6.9851 10.3054   1
  14 -10   1 -4.7590 10.6977   1
 -14 -10  -1 18.8535 12.3311   2
  14  10   1 -3.6871  9.1688   1
 -14  10  -1  4.3381 13.2519   3
 -15 -10  -1 2.30197 9.85142   2
  15 -10   1 5.18588 9.55384   1
  15  10   1  8.9687 12.4254   1
 -15  10  -1  7.0667 12.2751   3
  16 -10   1 13.3907 12.8534   1
 -16 -10  -1 -10.117   9.349   2
  16  10   1 2.66999 8.99200   1
 -16  10  -1 -5.4125 13.0968   3
 -14 -11   1  1.2964 10.6320   2
 -14  11   1 -1.9553 13.2111   3
  14  11  -1 -0.1132 12.2715   1
 -13 -11   1 -2.4121  8.6345   2
 -13  11   1  4.4994 10.0794   3
  13  11  -1 6.61644 9.78877   1
 -12 -11   1 -7.3873  8.3890   2
  12  11  -1 -2.9466  7.8923   1
 -12  11   1  0.2847 11.7615   3
 -11 -11   1 14.5116 12.5669   2
 -11  11   1 12.4330 10.6130   3
  11  11  -1  3.2726 11.1964   1
 -10 -11   1 -5.1781  7.8568   2
 -10  11   1 5.28561 9.91533   3
  10  11  -1 -6.4957  8.8190   1
  -9 -11   1 7.60280 9.04453   2
  -9 -11   1 4.51291 8.46771   1
   9 -11  -1 -8.2954  9.8058   1
   9  11  -1  8.7988 10.7223   1
  -9  11   1 17.8931 10.7887   3
  -8 -11   1 -6.0950  8.2551   2
   8 -11  -1 2.38599 9.47950   1
  -8 -11   1 11.6439 11.3036   1
  -8  11   1 13.2292 10.4442   3
   8  11  -1 -8.3575  8.7053   1
  -7 -11   1  1.8807 10.3020   1
  -7 -11   1 1.31650 9.51300   2
   7 -11  -1 11.1299  7.7991   1
  -7  11   1 -4.4390  8.0602   3
   7  11  -1  9.9061 10.1032   1
  -6 -11   1 3.84554 9.39747   2
  -6 -11   1 11.2426 10.8626   1
   6 -11  -1 8.92599 9.96900   1
   6  11  -1 38.7350 12.9942   1
  -6  11   1 11.3417 11.0141   3
  -5 -11   1 12.4331  9.8044   1
   5 -11  -1 -10.266   7.962   1
   5  11  -1 18.0840  9.6156   1
  -5  11   1 10.6506  8.4220   3
   4 -11  -1 19.8738 11.8312   1
  -4 -11   1 23.6303 11.0785   1
  -4  11   1 29.9661 11.2514   3
   4  11  -1 25.5603 11.2027   1
   3 -11  -1 9.25314 9.29658   1
  -3 -11   1 -2.0058  7.4701   1
  -3  11   1 11.1621 10.0089   3
   3  11  -1 20.4634 10.9740   1
   2 -11  -1 11.8469  8.7666   1
  -2 -11   1 26.7293 11.3640   1
  -1 -11   1 23.3590 11.9703   1
   1 -11  -1 35.7569 12.8329   1
   0 -11  -1 25.6248 11.6205   1
   0 -11   1 20.8419 12.2947   1
   1 -11   1 25.1509 12.4698   1
  -1 -11  -1 24.0468 10.7886   1
   2 -11   1  8.5003 11.6398   1
  -2 -11  -1 20.9110 10.0259   1
   2  11   1 22.8375 10.9593   1
  -3 -11  -1  5.0649 10.1211   1
   3 -11   1  8.0586 10.5030   1
  -3  11  -1 30.8517 11.6621   3
   3  11   1 16.9429 11.5729   1
   4 -11   1 6.40049 8.44680   1
  -4 -11  -1 -0.3038  8.0926   2
  -4 -11  -1 -0.6230  9.3991   1
   4  11   1 28.5029 11.5706   1
  -4  11  -1 11.3946  9.1411   3
  -5 -11  -1 17.1857  9.3441   1
   5 -11   1 15.3783 10.7297   1
  -5 -11  -1 19.8467 10.5868   2
   5  11   1 -1.1029  7.6147   1
  -5  11  -1 9.36183 9.40662   3
  -6 -11  -1 -4.5639  8.6503   2
  -6 -11  -1 9.90118 9.79766   1
   6 -11   1 15.7771  9.6488   1
  -6  11  -1 13.1497 10.5940   3
   6  11   1 -3.2914  6.9498   1
   7 -11   1  1.1867 10.6708   1
  -7 -11  -1 12.4251  9.0289   2
  -7 -11  -1 5.69240 8.53242   1
  -7  11  -1 12.3555  9.7989   3
   7  11   1 10.1667  9.2042   1
  -8 -11  -1 14.3744  9.8053   1
  -8 -11  -1  3.5502 10.5805   2
   8 -11   1  9.4048 12.4658   1
  -8  11  -1  7.3899 11.3574   3
   8  11   1 0.31414 7.87033   1
  -9 -11  -1 2.86770 8.02028   2
   9 -11   1  9.9167 11.6573   1
   9  11   1 8.07555 7.99168   1
  -9  11  -1 -0.1454  9.4737   3
 -10 -11  -1  6.4031 11.1432   2
  10 -11   1 11.4769 10.5882   1
  10  11   1 10.1498 10.0397   1
 -10  11  -1 -5.6990 10.1154   3
  11 -11   1  2.2588 11.1734   1
 -11 -11  -1 -6.8238  8.2303   2
 -11  11  -1  5.9887 11.6427   3
  11  11   1 -1.2538  8.8150   1
 -12 -11  -1  5.1626 10.8324   2
  12 -11   1 -0.7596 11.1370   1
  12  11   1 -6.3769 10.7253   1
 -12  11  -1 -4.2034  9.9353   3
  13 -11   1 -13.481  11.251   1
 -13 -11  -1 -12.950   8.176   2
  13  11   1  6.7185 10.2919   1
 -13  11  -1 -4.3241 13.8218   3
  -9 -12   1 17.7407 13.1916   1
  -9 -12   1 13.7180 13.2532   2
  -9  12   1 24.3585 13.5258   3
   9  12  -1 53.3695 15.7406   1
  -8 -12   1 6.56432 9.49643   1
  -8  12   1  1.0952 11.4000   3
   8  12  -1 0.63630 8.53234   1
  -7 -12   1 32.6891 13.4389   1
   7  12  -1 20.9692 11.3593   1
  -7  12   1 14.3713 13.3200   3
  -6 -12   1  3.7755 11.9310   1
   6  12  -1  5.8779 10.6012   1
  -6  12   1  6.5386 10.7604   3
  -5 -12   1 27.7688 15.2739   1
   5  12  -1  3.6923 11.8717   1
  -4 -12   1 -1.1392  8.2608   1
   4  12  -1 6.73765 9.61244   1
  -3 -12   1 2.38437 9.12082   1
   3 -12  -1  8.5750 11.5523   1
   3  12  -1 13.9202 11.4170   1
   2 -12  -1  1.8720 10.7193   1
  -2 -12   1 -8.5884 10.3218   1
   2  12  -1 6.98094 9.50196   1
   1 -12  -1 2.37806 8.59250   1
  -1 -12   1 -8.7130  9.2363   1
   0 -12  -1  5.4027 10.8848   1
   0 -12   1 -4.4645  8.3153   1
  -1 -12  -1 -3.2440  9.6568   1
   1 -12   1 -11.807   7.710   1
   1  12   1 15.0856 12.4612   1
   2 -12   1  2.5168 10.5613   1
  -2 -12  -1 -2.6831  9.6768   1
   2  12   1 4.41281 9.63800   1
   3 -12   1 10.5871 11.2160   1
  -3 -12  -1 2.27350 9.22523   1
   3  12   1 5.13031 9.16340   1
   4 -12   1 -4.6572  9.6466   1
  -4 -12  -1 -8.1618  7.5008   1
   4  12   1 5.72056 9.88028   1
   5 -12   1  4.1248 11.7271   1
  -5 -12  -1 6.70906 9.42536   1
   5  12   1 13.8436 12.2230   1
   6 -12   1  4.5001 10.7858   1
  -6 -12  -1 -8.5553 10.1393   1
  -6  12  -1  6.5412 12.9290   3
   6  12   1 10.1899 10.9886   1
   7 -12   1 17.4480 14.5005   1
  -7 -12  -1 15.5568 13.2909   1
  -7 -12  -1 -1.2091 10.1075   2
  -7  12  -1  2.3248 12.6200   3
   7  12   1 1.77888 8.03937   1
  -8 -12  -1  7.8961 11.1751   2
  -8 -12  -1  5.6599 10.6046   1
   8 -12   1 2.62034 9.23624   1
   8  12   1 1.14082 8.77772   1
  -8  12  -1 -13.816   9.574   3
   9 -12   1 15.2772 14.1818   1
  -9 -12  -1 30.2312 12.2651   2
  -9  12  -1 16.9851 14.5837   3
   9  12   1  4.1646 10.1014   1
  27   0  -2 -13.595  12.311   1
  26   0  -2  4.4034 11.2118   1
  25   0  -2  3.7666 10.1381   1
  24   0  -2 31.5294 15.0143   1
  23   0  -2 8.51669 9.65722   1
  22   0  -2 62.4782 16.3837   1
 -21   0   2 -5.7253  7.5882   2
  21   0  -2 14.9502  9.8095   1
 -20   0   2 113.397  16.067   2
  20   0  -2 123.188  19.174   1
  19   0  -2 -1.2089  8.4014   1
 -19   0   2 -6.7316  4.7248   2
  18   0  -2 91.8019 15.8594   1
 -18   0   2 101.729  15.055   2
 -17   0   2 0.93914 5.62262   2
  17   0  -2 -0.4443  6.6562   1
  16   0  -2 78.0337 13.7353   1
 -16   0   2 95.8765 13.4940   2
 -16   0   2 90.5917 11.3092   3
  15   0  -2 0.41826 5.72477   1
 -15   0   2 9.48055 5.49167   3
 -15   0   2 -7.9756  4.0404   2
 -14   0   2 258.473  17.370   2
 -14   0   2 262.141  15.067   3
  14   0  -2 268.763  19.322   1
  13   0  -2 -5.3851  4.3576   1
 -13   0   2 -1.8950  3.5150   3
 -13   0   2 4.12587 6.04447   2
 -12   0   2 90.8408  9.4116   3
  12   0  -2 74.5784 11.4526   1
 -12   0   2 93.9789 11.0367   2
  11   0  -2 -5.1175  3.3872   1
 -11   0   2 9.01379 5.59994   2
 -11   0   2 -1.2013  3.1040   3
  10   0  -2 198.528  13.732   1
 -10   0   2 195.117  12.552   2
   9   0  -2 6.18884 3.96238   1
  -9   0   2 2.79438 3.92215   2
  -8   0   2 940.339  29.925   2
   8   0  -2 922.328  30.962   1
  -7   0   2 -2.0572  3.0777   2
   7   0  -2 -0.7916  2.8454   1
   6   0  -2 988.618  29.725   1
  -6   0   2 1003.30   29.64   2
   5   0  -2 -4.4236  1.3742   3
   5   0  -2 0.80339 2.32797   1
  -5   0   2 -2.3593  3.6764   2
   4   0  -2 1866.00   45.54   1
  -4   0   2 1834.21   46.19   2
   4   0  -2 1810.63   44.91   3
   3   0  -2 1.76468 1.49085   1
  -3   0   2 -1.9861  1.3443   2
  -2   0   2 3343.99   77.64   2
  -1   0  -2 -11.542   1.347   3
  -2   0  -2 2664.55   65.49   3
   2   0   2 2914.26   66.10   1
  -3   0  -2 1.91763 2.29520   3
  -3   0  -2 -1.8233  1.4271   2
   3   0   2 -3.0176  2.0309   1
  -4   0  -2 6150.34  144.60   2
  -4   0  -2 6286.31  145.71   3
   4   0   2 6378.68  146.44   1
  -5   0  -2 1.12709 2.69393   3
  -5   0  -2 -2.9046  1.7549   2
   5   0   2 -2.1634  2.6049   1
   6   0   2 42.5483  6.9318   1
  -6   0  -2 33.2833  4.6171   3
  -6   0  -2 31.0231  4.5636   2
  -7   0  -2 2.85378 3.17007   3
  -7   0  -2 -4.7481  1.9243   2
   7   0   2 -1.9629  3.0675   1
   8   0   2 2583.93   71.70   1
  -8   0  -2 2645.24   67.11   3
  -8   0  -2 2608.63   67.26   2
  -9   0  -2 -2.6770  3.0683   2
   9   0   2 0.89723 4.18050   1
  -9   0  -2 -1.4905  3.5605   3
 -10   0  -2 508.741  20.549   2
  10   0   2 528.938  24.950   1
 -10   0  -2 503.750  19.881   3
 -11   0  -2 2.82948 4.15766   3
  11   0   2 2.37557 4.82060   1
 -11   0  -2 -0.5293  3.4441   2
  12   0   2 1.40136 5.18896   1
 -12   0  -2 -0.9759  3.7906   2
 -12   0  -2 -0.0980  4.0586   3
 -13   0  -2 6.75692 5.62269   3
  13   0   2 10.2521  5.9935   1
 -13   0  -2 2.41306 4.41710   2
 -14   0  -2 97.1844 11.3715   3
 -14   0  -2 96.4042 12.0390   2
  14   0   2 90.2073 14.1914   1
 -15   0  -2 -3.5883  5.7040   3
 -15   0  -2 -3.3186  4.9383   2
  15   0   2 8.98823 7.41541   1
  16   0   2 378.290  25.788   1
 -16   0  -2 353.800  20.094   3
 -16   0  -2 410.742  22.555   2
 -17   0  -2 1.60746 7.03855   2
  17   0   2 9.25443 8.70328   1
  18   0   2 56.7713 14.4477   1
 -18   0  -2 66.7231 12.3475   2
  19   0   2 5.65735 8.44052   1
  20   0   2 103.310  18.509   1
  21   0   2  1.8775 10.4692   1
  22   0   2 58.1428 16.7346   1
  23   0   2  9.9846 12.7928   1
  24   0   2  8.2250 12.4866   1
  25   0   2 -1.6027  9.5327   1
  26   0   2 30.8960 15.6288   1
  27  -1  -2 10.9373 11.0507   1
  27   1  -2 -5.1240 10.6383   1
  26  -1  -2 16.1715 11.5745   1
  26   1  -2 -6.7377 11.6088   1
  25  -1  -2 6.77357 8.91720   1
  25   1  -2 -5.9849 10.1804   1
  24  -1  -2 1.72039 9.80434   1
  24   1  -2  9.9552 11.7804   1
 -23  -1   2 9.67575 9.99681   2
  23  -1  -2 -6.7879  8.8741   1
  23   1  -2 4.19896 9.19163   1
  22  -1  -2 19.2190 10.9670   1
 -22  -1   2 23.6766 11.8530   2
  22   1  -2 15.1165 10.8291   1
 -21  -1   2 6.01364 8.25354   2
  21  -1  -2 -9.2474  6.9190   1
  21   1  -2 4.63793 8.61413   1
 -20  -1   2 10.3038  8.2652   2
  20  -1  -2 1.05825 7.70039   1
  20   1  -2 15.6989 11.4462   1
 -19  -1   2 15.8685  7.9211   2
  19  -1  -2 6.33463 8.78374   1
  19   1  -2  5.5315 10.0810   1
 -19   1   2 16.4205  8.3951   2
 -18  -1   2 16.4857  9.4710   2
  18  -1  -2 11.1229  8.5250   1
 -18   1   2 6.47819 6.90952   3
  18   1  -2 16.9349 10.9025   1
 -18   1   2 23.0270  8.5412   2
  17  -1  -2 5.65258 7.27425   1
 -17  -1   2 -2.2608  7.7543   2
 -17   1   2 4.07409 6.86251   2
  17   1  -2 3.56322 7.85175   1
 -17   1   2 -4.5005  5.4408   3
 -16  -1   2 17.3521  7.8733   2
  16  -1  -2 9.86970 7.98290   1
 -16   1   2 8.02045 6.07461   3
  16   1  -2 10.0146  7.5839   1
 -16   1   2 12.1883  7.6808   2
  15  -1  -2 30.3036  8.8409   1
 -15  -1   2 16.5028  7.8291   2
  15   1  -2 21.6763  7.9743   1
 -15   1   2 22.6855  7.3364   2
 -15   1   2 12.3686  6.2102   3
 -14  -1   2 426.579  18.264   3
 -14  -1   2 415.959  22.418   2
  14  -1  -2 426.301  24.141   1
 -14   1   2 409.415  20.610   2
 -14   1   2 424.164  21.087   3
  14   1  -2 442.789  24.660   1
 -13  -1   2 121.859   9.121   3
 -13  -1   2 139.318  14.522   2
  13  -1  -2 123.509  14.748   1
 -13   1   2 133.981  13.257   3
  13   1  -2 142.467  15.646   1
 -13   1   2 117.323  12.639   2
 -12  -1   2 540.292  19.109   3
 -12  -1   2 522.510  24.437   2
  12  -1  -2 502.535  24.686   1
 -12   1   2 549.703  23.035   3
 -12   1   2 534.872  22.738   2
  12   1  -2 502.419  24.784   1
  11  -1  -2 71.9021 10.3532   1
 -11  -1   2 64.2886  6.7242   3
 -11  -1   2 46.7084  8.6816   2
 -11   1   2 64.6359  9.0054   2
  11   1  -2 37.7962  8.3375   1
 -10  -1   2 1958.66   49.29   3
 -10  -1   2 1807.67   55.15   2
  10  -1  -2 1866.75   55.67   1
  10   1  -2 1879.05   55.70   1
 -10   1   2 1931.28   53.28   2
  -9  -1   2 981.641  33.598   2
   9  -1  -2 997.935  34.030   1
  -9  -1   2 1003.63   28.16   3
   9   1  -2 1001.44   33.46   1
  -9   1   2 1063.72   32.06   2
  -8  -1   2 303.267  15.417   2
   8  -1  -2 319.976  15.410   1
  -8   1   2 309.756  13.862   2
   8   1  -2 295.792  14.513   1
   7  -1  -2 78.5240  8.4941   1
  -7  -1   2 121.641  10.759   2
   7   1  -2 84.5731  8.2448   1
  -7   1   2 93.2011  8.1517   2
  -6  -1   2 1638.19   45.07   2
  -6   1   2 1631.46   42.10   2
   6   1  -2 1571.97   43.01   1
   5  -1  -2 153.857   8.430   1
   5  -1  -2 149.404   8.127   3
  -5  -1   2 148.468   9.133   2
  -5   1   2 135.303   7.047   2
   4  -1  -2 1662.40   40.86   1
  -4  -1   2 1666.91   43.04   2
   4  -1  -2 1561.40   42.03   3
  -4   1   2 1590.59   40.04   2
   4   1  -2 1581.93   40.67   1
   3  -1  -2 0.45042 1.62464   3
   3  -1  -2 0.81794 1.51263   1
  -3  -1   2 -0.7150  1.4231   1
  -3  -1   2 0.38558 2.26908   2
   3   1  -2 -0.1724  1.5184   1
  -3   1   2 -0.2355  1.2186   2
  -2  -1   2 269.922  10.024   2
   2  -1  -2 265.272   9.718   3
  -2  -1   2 276.359   9.774   1
  -2   1   2 262.335   8.644   2
   1  -1  -2 0.30124 1.20456   3
  -1  -1   2 -1.5549  1.1709   1
  -1   1   2 0.63475 0.95509   2
   0  -1   2 17.9574  2.5758   1
   0  -1  -2 25.6933  2.8990   2
   0  -1  -2 23.7821  2.6532   3
   0   1  -2 20.8364  2.7217   3
  -1  -1  -2 370.684  12.122   2
  -1  -1  -2 377.808  11.003   3
   1  -1   2 370.917  12.150   1
  -1   1  -2 389.668  12.337   3
   1   1   2 394.091  11.194   1
  -2  -1  -2 18.5194  2.3730   3
  -2  -1  -2 11.0984  2.7322   2
   2  -1   2 12.1854  2.6146   1
   2   1   2 21.2989  3.0805   1
  -2   1  -2 16.0098  3.2134   3
  -3  -1  -2 240.999  10.011   2
   3  -1   2 218.785   9.860   1
  -3  -1  -2 234.395   7.945   3
  -3   1  -2 251.001  10.354   3
   3   1   2 230.981   9.706   1
  -4  -1  -2 317.068  12.585   2
   4  -1   2 321.732  13.295   1
  -4  -1  -2 326.060  10.317   3
   4   1   2 317.024  12.992   1
  -4   1  -2 328.858  13.036   3
  -5  -1  -2 31.1585  3.7622   3
  -5  -1  -2 37.7345  5.1564   2
   5  -1   2 17.2208  4.0978   1
  -5   1  -2 22.3346  4.8328   3
  -5   1  -2 25.8159  3.1679   2
   5   1   2 23.4325  4.8499   1
   6  -1   2 878.364  28.783   1
  -6  -1  -2 868.294  23.811   3
  -6  -1  -2 898.796  27.651   2
   6   1   2 872.952  28.831   1
  -6   1  -2 876.618  27.737   3
  -6   1  -2 857.305  24.114   2
   7  -1   2 212.882  13.050   1
  -7  -1  -2 218.284  11.920   2
  -7  -1  -2 222.916   9.402   3
   7   1   2 226.208  13.221   1
  -7   1  -2 234.074   9.953   2
  -7   1  -2 213.328  11.731   3
  -8  -1  -2 693.080  24.833   2
  -8  -1  -2 699.617  21.065   3
   8  -1   2 671.514  26.692   1
  -8   1  -2 695.198  21.928   2
  -8   1  -2 700.124  24.783   3
   8   1   2 656.629  26.496   1
  -9  -1  -2 11.2552  4.7453   2
  -9  -1  -2 10.8411  3.9282   3
   9  -1   2 11.9055  5.9985   1
  -9   1  -2 6.54924 3.40972   2
  -9   1  -2 4.49207 4.04479   3
   9   1   2 16.7904  5.9556   1
  10  -1   2 282.437  17.542   1
 -10  -1  -2 292.773  12.692   3
 -10  -1  -2 264.549  14.996   2
  10   1   2 277.994  17.297   1
 -10   1  -2 277.508  14.962   3
 -10   1  -2 246.338  12.763   2
 -11  -1  -2 197.698  10.713   3
 -11  -1  -2 163.377  12.117   2
  11  -1   2 161.382  16.417   1
 -11   1  -2 183.520  11.286   2
  11   1   2 196.483  17.836   1
 -11   1  -2 163.657  14.319   3
 -12  -1  -2 872.848  28.149   3
  12  -1   2 855.647  35.994   1
 -12  -1  -2 853.430  32.497   2
 -12   1  -2 888.525  30.146   2
  12   1   2 955.052  37.367   1
 -12   1  -2 847.636  31.972   3
  13  -1   2 55.1249 12.2810   1
 -13  -1  -2 53.6586  7.9046   3
 -13  -1  -2 29.8673  7.3102   2
 -13   1  -2 59.5381  8.8237   2
  13   1   2 34.1933  9.5560   1
 -13   1  -2 45.8969  8.6116   3
  14  -1   2 343.420  23.386   1
 -14  -1  -2 392.189  17.765   3
 -14  -1  -2 383.056  21.436   2
 -14   1  -2 408.844  19.589   2
 -14   1  -2 397.107  21.308   3
  14   1   2 413.648  25.309   1
  15  -1   2 23.4730  9.6663   1
 -15  -1  -2 23.5904  7.7582   2
 -15   1  -2 28.8930  8.7167   3
 -15   1  -2 36.1297  8.3473   2
  15   1   2 45.1801 12.3844   1
 -16  -1  -2 245.091  21.399   2
  16  -1   2 236.808  24.386   1
  16   1   2 201.452  22.646   1
 -16   1  -2 260.004  17.216   2
 -16   1  -2 218.628  19.596   3
  17  -1   2 3.27466 7.72087   1
 -17  -1  -2 8.10250 6.33174   2
  17   1   2 -3.9521  7.0357   1
 -17   1  -2 7.56141 8.01013   3
 -18  -1  -2 83.7387 13.7711   2
  18  -1   2 70.3229 14.9184   1
  18   1   2 94.2288 16.6649   1
 -19  -1  -2 16.4757  9.3028   2
  19  -1   2 2.41202 8.32461   1
  19   1   2 -6.0626  7.8957   1
  20  -1   2 17.9299 10.4550   1
 -20  -1  -2 15.7212  9.3609   2
  20   1   2 -6.9699  7.6283   1
  21  -1   2 7.75590 9.26854   1
  21   1   2 -5.8357  9.4764   1
  22  -1   2 -3.5453  8.3218   1
  22   1   2 6.45501 9.24593   1
  23  -1   2 -8.1538  7.1953   1
  23   1   2  3.3055 10.6929   1
  24  -1   2 2.28739 8.49337   1
  24   1   2 13.8644 11.9343   1
  25  -1   2  8.0280 10.1505   1
  25   1   2 12.6346 11.3443   1
  26  -1   2 -1.4217 13.4665   1
  26   1   2  9.2416 13.8960   1
  27  -2  -2 10.1626 14.1232   1
  27   2  -2  2.5808 12.0916   1
  26  -2  -2  9.6600 13.6643   1
  26   2  -2 13.0139 12.3038   1
 -25  -2   2  3.0157 10.2357   2
  25  -2  -2 -2.9218  9.7624   1
  25   2  -2 14.1887 11.8381   1
 -24  -2   2 6.71279 9.45258   2
  24  -2  -2 -1.3061 10.7623   1
  24   2  -2 15.5528 11.8892   1
 -23  -2   2  8.0150 10.3150   2
  23  -2  -2 -1.9556  7.4826   1
  23   2  -2 2.24947 9.54711   1
  22  -2  -2 45.7537 13.9625   1
 -22  -2   2 66.7389 16.1725   2
  22   2  -2 56.1683 16.1530   1
  21  -2  -2 25.1602 10.9504   1
 -21  -2   2 29.5129 11.4611   2
  21   2  -2 17.7372 11.0452   1
  20  -2  -2 77.2961 15.2817   1
 -20  -2   2 103.864  17.238   2
  20   2  -2 98.3865 17.3196   1
 -19  -2   2 34.8598 12.0863   2
  19  -2  -2 61.0003 13.3592   1
  19   2  -2 68.4677 14.9181   1
 -19   2   2 44.5630 11.0504   3
  18  -2  -2 305.666  22.988   1
 -18  -2   2 291.437  26.048   2
 -18   2   2 300.447  21.080   3
  18   2  -2 271.305  26.341   1
 -17  -2   2 9.99044 8.96554   2
  17  -2  -2 42.5744 11.4966   1
  17   2  -2 1.07774 6.90502   1
 -17   2   2 20.9318  7.8105   2
 -17   2   2 13.3719  7.2027   3
 -16  -2   2 151.658  17.936   2
  16  -2  -2 133.948  16.750   1
 -16   2   2 147.794  14.938   2
 -16   2   2 139.655  15.630   3
  16   2  -2 137.572  18.029   1
  15  -2  -2 9.46537 7.35995   1
 -15  -2   2 3.74481 6.74619   2
  15   2  -2 3.74730 5.99778   1
 -15   2   2 9.65288 6.39520   3
 -15   2   2 13.2018  6.5981   2
  14  -2  -2 185.000  18.685   1
 -14  -2   2 202.212  19.620   2
 -14   2   2 199.046  17.760   3
  14   2  -2 236.940  21.301   1
 -14   2   2 188.480  13.872   2
  13  -2  -2 -2.8450  4.1897   1
 -13  -2   2 24.6080  8.2400   2
 -13   2   2 8.77499 5.69126   3
  13   2  -2 12.8864  6.9993   1
 -13   2   2 19.9795  6.5671   2
  12  -2  -2 34.2648  8.1421   1
 -12  -2   2 31.4425  8.3677   2
 -12   2   2 23.2639  6.3801   2
  12   2  -2 25.8210  7.1664   1
 -11  -2   2 -3.1015  2.1413   3
  11  -2  -2 -3.8657  3.5477   1
 -11  -2   2 -0.3301  4.2910   2
 -11   2   2 1.03974 4.47004   2
  11   2  -2 4.21095 4.18748   1
  10  -2  -2 423.552  20.091   1
 -10  -2   2 417.448  12.373   3
 -10  -2   2 419.034  20.476   2
  10   2  -2 450.528  20.173   1
 -10   2   2 376.530  16.742   2
  -9  -2   2 153.874  13.966   2
   9  -2  -2 153.262  11.107   1
  -9   2   2 157.510   9.707   2
   9   2  -2 171.818  11.505   1
  -8  -2   2 216.037  13.237   2
   8  -2  -2 212.379  12.298   1
   8   2  -2 199.772  11.898   1
  -8   2   2 227.102  10.584   2
   7  -2  -2 20.2218  4.7234   1
  -7  -2   2 4.93065 3.74813   2
   7   2  -2 11.7996  3.9338   1
  -7   2   2 14.6658  3.6742   2
  -6  -2   2 120.993  10.751   2
   6  -2  -2 116.835   7.686   1
  -6   2   2 127.438   6.934   2
   6   2  -2 105.204   7.664   1
  -5  -2   2 102.261   8.977   1
   5  -2  -2 114.822   7.402   1
  -5  -2   2 112.074   9.759   2
   5   2  -2 111.103   7.516   1
  -5   2   2 126.626   6.335   2
  -4  -2   2 758.204  24.195   1
   4  -2  -2 806.253  25.218   3
   4  -2  -2 753.984  22.408   1
  -4  -2   2 762.723  24.618   2
   4   2  -2 761.325  23.957   1
  -4   2   2 772.258  21.370   2
   3  -2  -2 388.537  13.077   1
  -3  -2   2 403.744  14.955   1
   3  -2  -2 405.372  15.274   3
  -3  -2   2 388.943  14.700   2
  -3   2   2 376.861  12.457   2
   2  -2  -2 2117.53   54.73   3
  -2  -2   2 2129.65   53.74   2
  -2  -2   2 2115.83   54.26   1
   2  -2  -2 2106.68   51.84   1
   2   2  -2 2218.97   51.59   3
  -2   2   2 2142.71   52.37   2
  -1  -2   2 638.278  19.307   2
   1  -2  -2 710.800  19.813   2
   1  -2  -2 670.516  19.079   1
  -1  -2   2 647.056  20.795   1
   1  -2  -2 662.998  20.287   3
   1   2  -2 648.464  19.057   3
   0  -2  -2 900.853  24.923   3
   0  -2  -2 862.604  24.184   1
   0  -2   2 840.420  25.761   1
   0  -2   2 917.312  23.674   2
   0  -2  -2 901.374  25.322   2
   0   2  -2 920.941  25.260   3
  -1  -2  -2 2339.60   58.53   2
   1  -2   2 2335.26   58.53   1
  -1  -2  -2 2328.96   56.91   3
  -1  -2  -2 2378.64   56.89   1
  -1   2  -2 2260.55   58.66   3
   1   2   2 2401.49   56.79   1
  -2  -2  -2 3230.35   80.49   2
  -2  -2  -2 3274.56   78.61   1
   2  -2   2 3337.20   79.94   1
  -2  -2  -2 3252.30   77.64   3
  -2   2  -2 3367.47   81.41   3
   2   2   2 3283.17   77.96   1
   3  -2   2 62.9841  6.6881   1
  -3  -2  -2 52.3853  3.6412   3
  -3  -2  -2 58.8950  6.4567   2
   3   2   2 71.0868  6.1552   1
  -3   2  -2 54.7747  6.4521   3
  -4  -2  -2 996.000  25.000   3
   4  -2   2 953.355  29.320   1
  -4  -2  -2 998.106  30.023   2
  -4   2  -2 924.955  29.881   3
   4   2   2 963.353  28.129   1
   5  -2   2 184.980  10.660   1
  -5  -2  -2 187.235   7.026   3
  -5  -2  -2 189.226  10.727   2
   5   2   2 184.867  10.076   1
  -5   2  -2 187.487  11.006   3
  -6  -2  -2 496.143  19.746   2
  -6  -2  -2 508.721  14.618   3
   6  -2   2 515.503  20.188   1
  -6   2  -2 507.696  20.278   3
   6   2   2 472.992  18.930   1
   7  -2   2 -3.8471  2.4595   1
  -7  -2  -2 4.03400 3.56880   2
  -7  -2  -2 -0.4915  1.7222   3
  -7   2  -2 1.69958 2.11708   2
  -7   2  -2 -0.7226  3.6019   3
   7   2   2 1.55743 3.02200   1
   8  -2   2 364.189  17.899   1
  -8  -2  -2 344.358  11.558   3
  -8  -2  -2 360.719  17.498   2
  -8   2  -2 343.680  12.385   2
   8   2   2 346.322  17.397   1
  -8   2  -2 314.237  16.632   3
  -9  -2  -2 37.0518  4.5849   3
  -9  -2  -2 34.2318  7.0746   2
   9  -2   2 27.7860  6.9912   1
   9   2   2 39.6280  7.5263   1
  -9   2  -2 46.1365  5.3471   2
  -9   2  -2 12.5878  6.0246   3
  10  -2   2 117.551  13.356   1
 -10  -2  -2 105.368   6.512   3
 -10  -2  -2 121.347  12.398   2
 -10   2  -2 117.535   7.878   2
  10   2   2 135.750  14.242   1
 -10   2  -2 101.021  12.065   3
 -11  -2  -2 1.88573 4.87027   2
  11  -2   2 -4.9761  3.8000   1
 -11  -2  -2 0.06501 3.14783   3
 -11   2  -2 -0.1771  5.7820   3
  11   2   2 0.58230 4.72024   1
 -11   2  -2 1.77814 3.60454   2
  12  -2   2 8.58825 5.80836   1
 -12  -2  -2 -3.3344  4.7965   2
 -12   2  -2 0.18667 5.18824   3
  12   2   2 -2.3821  4.8777   1
 -12   2  -2 1.41799 3.94367   2
 -13  -2  -2 10.9035  6.1889   2
  13  -2   2 8.78770 6.79234   1
 -13   2  -2 16.8276  6.9231   3
  13   2   2 21.7658  8.2625   1
 -13   2  -2 9.08653 4.89353   2
  14  -2   2 56.6726 11.7300   1
 -14  -2  -2 34.6266  9.1760   2
  14   2   2 43.0102 10.8657   1
 -14   2  -2 37.7771  9.7643   3
  15  -2   2 94.6648 15.4502   1
 -15  -2  -2 61.0720 11.1632   2
  15   2   2 67.8727 13.3007   1
 -15   2  -2 64.2620 12.3011   3
  16  -2   2 79.9522 14.7392   1
 -16  -2  -2 79.9152 13.4315   2
  16   2   2 135.723  18.562   1
 -16   2  -2 103.378  14.628   3
  17  -2   2 62.4212 13.6482   1
 -17  -2  -2 86.5051 14.7849   2
  17   2   2 51.3748 13.0591   1
 -17   2  -2 51.0195 12.0715   3
  18  -2   2 48.4662 12.9725   1
 -18  -2  -2 87.9568 15.0976   2
  18   2   2 74.5630 15.9243   1
 -18   2  -2 31.3053 11.5748   3
 -19  -2  -2 3.19569 7.90450   2
  19  -2   2 -6.1324  7.3536   1
  19   2   2 9.78297 9.33736   1
 -19   2  -2 -3.1509  8.6567   3
 -20  -2  -2 77.2640 15.0364   2
  20  -2   2 49.0175 14.1544   1
  20   2   2 70.9310 15.5990   1
  21  -2   2 11.6716  9.7930   1
 -21  -2  -2 17.0026 11.8609   2
  21   2   2 -0.8697  8.5006   1
  22  -2   2 25.4535 11.9839   1
 -22  -2  -2 40.3632 13.4687   2
  22   2   2 63.6615 16.0022   1
  23  -2   2 -8.2040  9.8730   1
  23   2   2  6.7390 10.9934   1
  24  -2   2 19.8129 11.6032   1
  24   2   2 27.1645 15.0362   1
  25  -2   2 10.2297 10.3475   1
  25   2   2  4.8279 10.2854   1
  26  -2   2 13.8225 11.0996   1
  26   2   2  7.4748 12.2772   1
 -26  -3   2 -1.7994 13.1726   2
  26  -3  -2 5.62241 9.56395   1
  26   3  -2 23.2514 14.1665   1
 -25  -3   2  3.5217 10.3068   2
  25  -3  -2 1.26073 8.99241   1
  25   3  -2 -5.4420 10.5482   1
 -24  -3   2 10.2962 12.0856   2
  24  -3  -2  9.9132 11.8516   1
  24   3  -2 -7.3626  9.2075   1
  23  -3  -2 5.45113 9.63133   1
 -23  -3   2 6.25677 9.66243   2
  23   3  -2 11.7060 10.8873   1
 -22  -3   2 1.85769 7.95019   2
  22  -3  -2 -4.3093  6.7797   1
  22   3  -2 -2.5569  8.9327   1
 -21  -3   2 -2.6250  8.8666   2
  21  -3  -2 4.12946 8.07507   1
  21   3  -2 12.8339 10.5155   1
 -21   3   2 -6.9211  6.2866   3
 -20  -3   2 -1.2733  7.9571   2
  20  -3  -2 3.74423 8.71111   1
  20   3  -2 4.05056 8.24726   1
 -20   3   2 10.0138  8.4261   3
 -19  -3   2 4.25038 8.81781   2
  19  -3  -2 0.57488 6.55761   1
  19   3  -2 -8.1680  6.8387   1
 -19   3   2 0.72591 8.09431   3
  18  -3  -2 7.53861 7.56933   1
 -18  -3   2 10.5864  8.8118   2
 -18   3   2 -0.4528  7.8550   3
  18   3  -2 4.49010 7.69664   1
  17  -3  -2 8.28517 6.95876   1
 -17  -3   2 0.68811 7.21762   2
 -17   3   2 2.95705 7.23924   3
  17   3  -2 -1.0416  6.9110   1
 -16  -3   2 126.999  17.281   2
  16  -3  -2 122.992  16.150   1
  16   3  -2 101.211  16.171   1
 -16   3   2 110.582  15.161   3
 -15  -3   2 132.750  17.061   2
  15  -3  -2 105.263  14.942   1
 -15   3   2 98.2872 14.0142   3
  15   3  -2 135.103  16.929   1
 -15   3   2 119.652  12.886   2
 -14  -3   2 118.552  15.403   2
  14  -3  -2 160.567  16.969   1
 -14   3   2 157.503  17.231   3
  14   3  -2 162.353  17.340   1
 -14   3   2 149.920  13.907   2
  13  -3  -2 180.720  17.453   1
 -13  -3   2 181.659  18.093   2
 -13   3   2 168.221  18.045   3
  13   3  -2 161.902  16.415   1
 -13   3   2 172.521  12.604   2
 -12  -3   2 410.840  22.768   2
  12  -3  -2 396.220  21.050   1
  12   3  -2 405.648  21.499   1
 -12   3   2 386.330  17.791   2
  11  -3  -2 209.903  14.049   1
 -11  -3   2 166.283  16.101   2
  11   3  -2 182.582  16.124   1
 -11   3   2 186.682  11.170   2
 -10  -3   2 552.114  25.600   2
  10  -3  -2 607.456  24.561   1
  10   3  -2 537.404  23.636   1
 -10   3   2 541.587  19.895   2
   9  -3  -2 304.232  15.818   1
  -9  -3   2 278.401  16.900   2
  -9   3   2 295.127  12.791   2
   9   3  -2 282.064  15.592   1
   8  -3  -2 841.387  28.831   1
  -8  -3   2 839.017  31.268   2
   8   3  -2 822.640  29.051   1
  -8   3   2 836.042  25.024   2
   7  -3  -2 1077.75   33.56   1
  -7  -3   2 1093.26   36.40   2
  -7   3   2 1078.28   30.05   2
   7   3  -2 1054.86   33.95   1
  -6  -3   2 843.675  29.023   1
  -6  -3   2 813.463  29.170   2
   6  -3  -2 821.838  26.701   1
   6   3  -2 806.072  27.661   1
  -6   3   2 835.015  23.844   2
  -5  -3   2 219.378  12.561   2
  -5  -3   2 243.212  13.042   1
   5  -3  -2 229.901  11.301   1
  -5   3   2 232.836   9.601   2
   5   3  -2 212.199  12.007   1
  -4  -3   2 684.197  24.280   2
  -4  -3   2 668.763  24.018   1
   4  -3  -2 667.482  22.404   1
   4   3  -2 712.346  24.471   1
   4   3  -2 708.836  19.034   3
  -4   3   2 713.783  20.781   2
  -3  -3   2 6.10657 3.12818   2
  -3  -3   2 5.33011 3.71001   1
   3  -3  -2 11.1722  3.8030   1
   3   3  -2 14.7699  2.8759   3
  -3   3   2 11.5433  3.0401   2
   2  -3  -2 367.442  14.038   1
  -2  -3   2 341.707  14.111   2
  -2  -3   2 364.168  15.631   1
   2  -3  -2 335.157  12.935   2
   2  -3  -2 331.827  14.839   3
   2   3  -2 344.983  12.659   3
  -1  -3   2 1740.51   45.33   2
   1  -3  -2 1700.74   45.31   1
   1  -3  -2 1704.43   46.80   3
   1  -3  -2 1678.98   45.25   2
  -1  -3   2 1721.95   47.56   1
   1   3  -2 1801.14   45.53   3
   0  -3   2 302.287  13.904   1
   0  -3  -2 271.890  12.310   2
   0  -3   2 289.050  11.323   2
   0  -3  -2 297.712  12.483   3
   0  -3  -2 273.435  12.171   1
   0   3  -2 313.918  13.042   3
   1  -3   2 1875.19   46.46   2
  -1  -3  -2 1885.34   50.07   2
  -1  -3  -2 1871.48   48.90   1
   1  -3   2 1874.95   50.77   1
  -1  -3  -2 1860.48   48.59   3
  -1   3  -2 1852.17   50.35   3
  -2  -3  -2 -3.9700  1.6540   3
  -2  -3  -2 -0.9828  2.0606   1
   2  -3   2 -1.1262  2.6007   1
  -2  -3  -2 0.25107 3.00725   2
   2  -3   2 2.99608 1.70133   2
   2   3   2 -0.9351  1.9298   1
  -2   3  -2 0.86550 2.76895   3
   3  -3   2 303.261  14.446   1
  -3  -3  -2 302.570  11.371   3
   3  -3   2 322.170   9.740   2
  -3  -3  -2 300.808  13.735   1
  -3  -3  -2 313.194  14.605   2
   3   3   2 315.147  13.319   1
  -3   3  -2 318.383  14.934   3
   4  -3   2 83.5186  8.9093   1
  -4  -3  -2 98.1294  5.4443   3
  -4  -3  -2 99.3455  9.6370   2
  -4   3  -2 108.929  10.499   3
   4   3   2 85.6821  7.9025   1
  -5  -3  -2 83.8053  9.3651   2
  -5  -3  -2 65.4865  4.4108   3
   5  -3   2 77.8422  8.8560   1
  -5   3  -2 85.8913  9.6250   3
   5   3   2 63.9983  7.2295   1
  -6  -3  -2 743.529  27.742   2
  -6  -3  -2 733.753  20.568   3
   6  -3   2 735.237  26.980   1
   6   3   2 785.379  26.246   1
  -6   3  -2 764.369  28.433   3
   7  -3   2 81.6632  9.9003   1
  -7  -3  -2 108.740  11.350   2
  -7  -3  -2 90.2258  4.9325   3
   7   3   2 105.743  10.676   1
  -7   3  -2 102.288  11.294   3
   8  -3   2 846.359  30.659   1
  -8  -3  -2 811.821  21.744   3
  -8  -3  -2 769.133  30.122   2
   8   3   2 804.169  29.222   1
  -8   3  -2 767.019  30.459   3
  -8   3  -2 809.534  21.929   2
  -9  -3  -2 659.106  18.376   3
   9  -3   2 608.836  26.562   1
  -9  -3  -2 661.968  27.357   2
   9   3   2 648.247  26.452   1
  -9   3  -2 649.147  19.196   2
  -9   3  -2 618.666  27.141   3
 -10  -3  -2 446.990  22.124   2
  10  -3   2 432.669  22.281   1
  10   3   2 423.596  21.441   1
 -10   3  -2 398.296  21.467   3
 -10   3  -2 436.952  15.036   2
  11  -3   2 238.452  16.690   1
 -11  -3  -2 242.497  16.460   2
 -11   3  -2 227.634  11.029   2
  11   3   2 246.008  16.756   1
 -11   3  -2 229.084  16.313   3
 -12  -3  -2 354.550  21.128   2
  12  -3   2 381.598  22.091   1
  12   3   2 432.228  23.700   1
 -12   3  -2 340.699  20.853   3
  13  -3   2 219.455  20.784   1
 -13  -3  -2 217.343  19.682   2
  13   3   2 177.765  18.570   1
 -13   3  -2 220.001  20.162   3
 -14  -3  -2 177.277  18.251   2
  14  -3   2 205.090  20.445   1
 -14   3  -2 201.067  19.890   3
  14   3   2 178.275  19.501   1
  15  -3   2 135.060  17.840   1
 -15  -3  -2 178.372  19.621   2
  15   3   2 162.108  19.971   1
 -15   3  -2 147.335  17.765   3
 -16  -3  -2 146.023  17.858   2
  16  -3   2 134.684  18.182   1
 -16   3  -2 113.070  16.725   3
  16   3   2 133.210  18.440   1
 -17  -3  -2 112.868  17.293   2
  17  -3   2 106.553  16.825   1
  17   3   2 96.5902 17.0772   1
 -17   3  -2 126.803  17.318   3
  18  -3   2 43.5976 12.6959   1
 -18  -3  -2 49.8321 12.5536   2
 -18   3  -2 20.2836  9.9212   3
  18   3   2 31.1852 12.1231   1
  19  -3   2 0.27784 7.00920   1
 -19  -3  -2 10.9219 10.3259   2
 -19   3  -2 11.0973 10.6010   3
  19   3   2  7.4528 10.0215   1
 -20  -3  -2 16.9123 10.0303   2
  20  -3   2 5.46590 8.09555   1
 -20   3  -2 -4.3373  8.8920   3
  20   3   2  0.4590 11.4172   1
  21  -3   2 1.55444 8.82686   1
 -21  -3  -2  1.9189 10.3038   2
 -21   3  -2 11.1861 11.0864   3
  21   3   2  0.5181 10.9699   1
  22  -3   2 12.7143  9.8517   1
 -22  -3  -2 -6.6836  8.1329   2
  22   3   2  7.8038 10.6926   1
  23  -3   2 2.70121 9.17545   1
 -23  -3  -2 5.70402 9.86725   2
  23   3   2  5.4556 10.0606   1
  24  -3   2 -2.3203  8.3093   1
 -24  -3  -2  5.4421 12.4556   2
  24   3   2  3.0332 11.0883   1
  25  -3   2  1.2254 10.0689   1
  25   3   2  3.2297 11.5790   1
  26  -4  -2 -13.892   9.017   1
 -26  -4   2 24.5125 13.3863   2
  26   4  -2 -17.258  11.196   1
 -25  -4   2 26.3939 14.8257   2
  25  -4  -2 17.9375 12.5098   1
  25   4  -2  9.9469 14.4826   1
  24  -4  -2 12.7995 10.2058   1
 -24  -4   2 -8.2146 11.4087   2
  24   4  -2 -10.988   9.443   1
  23  -4  -2 35.0330 13.3078   1
 -23  -4   2  7.1469 12.5086   2
 -23   4   2 10.3831 13.3805   3
  23   4  -2 28.6060 13.4850   1
  22  -4  -2 18.5281 10.1033   1
 -22  -4   2 13.3581 11.9470   2
 -22   4   2 1.71026 8.56227   3
  22   4  -2  7.5067 12.8580   1
  21  -4  -2 34.6347 12.0040   1
 -21  -4   2 31.4366 14.4070   2
 -21   4   2 43.1109 13.8831   3
  21   4  -2 40.8462 13.8828   1
  20  -4  -2 23.1697 10.8229   1
 -20  -4   2 58.8978 15.8264   2
  20   4  -2 21.6103 10.9313   1
 -20   4   2 48.5312 13.1262   3
  19  -4  -2 53.0349 12.8318   1
 -19  -4   2 68.9418 15.1562   2
  19   4  -2 58.1006 15.3727   1
 -19   4   2 79.8299 15.8353   3
  18  -4  -2 66.9874 13.3006   1
 -18  -4   2 93.9775 16.2869   2
  18   4  -2 73.1734 15.0079   1
 -18   4   2 57.6021 13.2072   3
 -17  -4   2 72.5515 14.4894   2
  17  -4  -2 61.6521 12.7715   1
  17   4  -2 43.0382 11.5984   1
 -17   4   2 93.0112 15.9519   3
  16  -4  -2 51.3112 11.4769   1
 -16  -4   2 34.4507 10.6745   2
  16   4  -2 28.7823  9.5689   1
 -16   4   2 48.9251 11.9031   3
 -15  -4   2 41.2128 11.0561   2
  15  -4  -2 56.9098 12.4707   1
 -15   4   2 58.2230 12.0689   3
  15   4  -2 31.8205  9.5673   1
  14  -4  -2 10.3472  6.2283   1
 -14  -4   2 22.4163  8.8100   2
  14   4  -2 23.7720  8.1936   1
 -14   4   2 3.33321 6.37368   3
  13  -4  -2 38.5265  9.0158   1
 -13  -4   2 29.4861  9.2983   2
  13   4  -2 29.4691  8.1342   1
 -13   4   2 59.4357 11.8945   3
 -12  -4   2 -1.9095  5.1232   2
  12  -4  -2 24.7965  7.1120   1
 -12   4   2 24.5068  6.1525   2
  12   4  -2 16.1920  6.7283   1
  11  -4  -2 11.7185  6.1223   1
 -11  -4   2 -6.6390  3.9271   2
  11   4  -2 5.36221 6.12458   1
 -11   4   2 5.28842 4.46467   2
 -10  -4   2 -3.6979  4.0259   2
  10  -4  -2 -3.0816  3.1334   1
 -10   4   2 -7.7755  3.1641   2
  10   4  -2 2.98964 4.78568   1
   9  -4  -2 -3.1069  3.6470   1
  -9  -4   2 -4.0094  3.5018   2
  -9   4   2 4.62035 3.37982   2
   9   4  -2 1.42923 3.45263   1
   8  -4  -2 179.358  11.874   1
  -8  -4   2 173.346  15.824   2
   8   4  -2 175.314  12.318   1
  -8   4   2 147.698   8.714   2
   7  -4  -2 121.549  11.717   1
  -7  -4   2 146.610  13.830   2
  -7  -4   2 171.231  15.061   1
   7   4  -2 149.129  11.247   1
  -7   4   2 145.555   8.354   2
  -6  -4   2 301.129  16.509   2
   6  -4  -2 316.744  15.427   1
  -6  -4   2 327.390  17.192   1
  -6   4   2 300.885  12.277   2
   6   4  -2 298.291   9.838   3
   6   4  -2 312.460  16.281   1
   5  -4  -2 580.072  22.420   1
  -5  -4   2 549.506  23.455   1
  -5  -4   2 604.602  24.159   2
   5   4  -2 614.852  17.833   3
   5   4  -2 599.136  23.946   1
  -5   4   2 613.161  19.506   2
   4  -4  -2 149.051  10.358   1
  -4  -4   2 149.629  10.471   2
  -4  -4   2 148.476  11.008   1
  -4   4   2 138.683   8.039   2
   4   4  -2 152.621   7.722   3
  -3  -4   2 686.171  24.817   2
   3  -4  -2 680.771  22.492   2
   3  -4  -2 703.115  24.739   1
  -3  -4   2 700.176  26.301   1
   3   4  -2 709.438  22.034   3
   2  -4  -2 1027.51   32.05   1
   2  -4  -2 1006.04   30.45   2
  -2  -4   2 1047.33   32.01   2
  -2  -4   2 987.346  33.686   1
   2   4  -2 1041.34   30.50   3
   1  -4  -2 1670.59   46.19   1
  -1  -4   2 1620.42   47.94   1
   1  -4  -2 1633.88   45.22   2
  -1  -4   2 1595.19   44.86   2
   1   4  -2 1651.27   45.48   3
   0  -4  -2 153.136  10.015   3
   0  -4   2 152.790   8.918   2
   0  -4  -2 149.762   9.679   2
   0  -4  -2 166.240  10.601   1
   0  -4   2 178.102  11.756   1
   0   4  -2 156.218  10.296   3
  -1  -4  -2 1320.75   38.99   1
  -1  -4  -2 1292.24   38.14   3
   1  -4   2 1340.27   41.00   1
   1  -4   2 1356.77   36.04   2
  -1  -4  -2 1301.81   39.17   2
  -1   4  -2 1275.72   39.59   3
  -2  -4  -2 197.044  11.585   1
   2  -4   2 207.906  12.854   1
  -2  -4  -2 201.176  10.492   3
   2  -4   2 210.859   9.224   2
  -2  -4  -2 223.309  12.402   2
   2   4   2 214.317  11.805   1
  -2   4  -2 186.345  11.999   3
  -3  -4  -2 877.000  29.668   1
   3  -4   2 904.072  31.251   1
   3  -4   2 920.874  24.632   2
  -3  -4  -2 878.455  26.959   3
  -3  -4  -2 887.642  30.546   2
   3   4   2 876.936  29.291   1
  -3   4  -2 901.223  31.460   3
  -4  -4  -2 314.550  16.263   2
  -4  -4  -2 305.413  15.838   1
   4  -4   2 310.185  16.193   1
  -4  -4  -2 287.247  12.051   3
  -4   4  -2 296.087  16.334   3
   4   4   2 298.878  14.785   1
  -4   4  -2 308.658  10.217   2
  -5  -4  -2 399.582  18.500   1
  -5  -4  -2 383.767  13.920   3
   5  -4   2 398.590  18.764   1
  -5  -4  -2 411.130  19.332   2
  -5   4  -2 371.612  11.484   2
  -5   4  -2 409.049  19.886   3
   5   4   2 374.160  17.080   1
  -6  -4  -2 92.4806  5.8203   3
   6  -4   2 91.8340 10.9443   1
  -6  -4  -2 99.6251 11.8139   2
   6   4   2 106.244  10.704   1
  -6   4  -2 88.4882 11.1503   3
  -6   4  -2 104.903   4.716   2
  -7  -4  -2 222.023   9.105   3
   7  -4   2 238.592  14.948   1
  -7  -4  -2 224.085  15.066   2
   7   4   2 245.505  14.346   1
  -7   4  -2 247.701  16.118   3
  -8  -4  -2 141.435  14.568   2
   8  -4   2 131.098  13.557   1
   8   4   2 123.432  12.364   1
  -8   4  -2 116.189  13.486   3
  -9  -4  -2 101.880  12.377   2
   9  -4   2 107.021  13.130   1
   9   4   2 90.4033 11.4960   1
  -9   4  -2 108.103  13.631   3
  10  -4   2 83.9677 11.7440   1
 -10  -4  -2 97.1397 13.1376   2
  10   4   2 106.923  12.615   1
 -10   4  -2 81.4816 12.4179   3
 -11  -4  -2 -1.6009  4.4364   2
  11  -4   2 4.43342 4.86110   1
  11   4   2 4.90321 5.33552   1
 -11   4  -2 4.53802 6.16251   3
  12  -4   2 -1.7117  4.8073   1
 -12  -4  -2 7.88399 6.37111   2
 -12   4  -2 -5.3063  4.9885   3
  12   4   2 1.95828 4.96585   1
  13  -4   2 1.83739 5.23029   1
 -13  -4  -2 1.02657 5.34770   2
  13   4   2 -0.0321  6.0277   1
 -13   4  -2 3.72852 7.92938   3
 -14  -4  -2 -4.4974  4.9290   2
  14  -4   2 -9.7960  4.2344   1
  14   4   2 -1.2248  6.2188   1
 -14   4  -2 13.5062  7.9933   3
  15  -4   2 27.6577  9.6318   1
 -15  -4  -2 17.7895  8.7692   2
  15   4   2 30.0594 10.6631   1
 -15   4  -2 57.4639 12.4865   3
 -16  -4  -2 -6.0908  6.7788   2
  16  -4   2 7.25948 7.22491   1
  16   4   2 1.73190 9.14749   1
 -16   4  -2 -3.8530  6.5815   3
  17  -4   2 18.0270  9.5105   1
 -17  -4  -2 29.3573 10.5890   2
 -17   4  -2 33.6780 12.0227   3
  17   4   2 34.5577 12.5700   1
  18  -4   2 28.7845 11.0920   1
 -18  -4  -2 44.1614 12.5702   2
  18   4   2 18.6200 10.6953   1
 -18   4  -2 7.58648 8.52014   3
  19  -4   2 19.7272 10.5643   1
 -19  -4  -2 22.3376 10.7487   2
 -19   4  -2 19.7840 11.2973   3
  19   4   2 29.8841 12.9977   1
 -20  -4  -2 11.4242  9.4761   2
  20  -4   2 1.69763 9.08896   1
 -20   4  -2 19.9084 11.9753   3
  20   4   2 19.2703 11.2436   1
 -21  -4  -2 20.1285 13.3727   2
  21  -4   2 20.6676 12.1652   1
 -21   4  -2 36.5639 13.7836   3
  21   4   2 18.1159 12.7327   1
 -22  -4  -2 15.5529 10.0061   2
  22  -4   2 11.0207 10.8727   1
 -22   4  -2 -9.4968 10.7882   3
  22   4   2 15.1103 12.6123   1
  23  -4   2 -6.0693  8.6531   1
 -23  -4  -2 -0.4586 12.1302   2
  23   4   2  9.8405 12.8633   1
  24  -4   2  9.2031 10.5692   1
 -24  -4  -2  9.3651 12.3206   2
  24   4   2  5.0053 11.0634   1
  25  -4   2 -8.3755  9.1190   1
 -25  -4  -2 23.8368 14.2270   2
  25   4   2 -0.3463 14.6482   1
  25  -5  -2 4.26512 9.74542   1
 -25  -5   2 -1.3288 11.5770   2
  25   5  -2  8.2817 12.7923   1
 -24  -5   2 -2.9004 12.6604   2
  24  -5  -2 -4.5230 10.2416   1
  24   5  -2 4.90407 9.76320   1
 -24   5   2 -8.3310 12.0903   3
 -23  -5   2 -1.9141 11.1574   2
  23  -5  -2 -5.1124  9.3611   1
  23   5  -2 -6.3495 10.0365   1
 -23   5   2  9.9809 11.7074   3
  22  -5  -2 -2.9788  8.1846   1
 -22  -5   2 -8.8464  7.5811   2
  22   5  -2  3.9884 11.2457   1
 -22   5   2 -9.9427  9.8454   3
 -21  -5   2 3.30746 8.90646   2
  21  -5  -2 -8.9423  7.9543   1
 -21   5   2 13.2579  9.5256   3
  21   5  -2 -3.3850  8.2393   1
  20  -5  -2 0.21830 7.19917   1
 -20  -5   2 -8.0634  8.1922   2
  20   5  -2 -9.4951  6.8343   1
 -20   5   2 -2.7730  7.8214   3
 -19  -5   2  6.0657 11.0015   2
  19  -5  -2 7.30244 8.42206   1
 -19   5   2  9.1870 10.2176   3
  19   5  -2 -5.7802  8.6071   1
 -18  -5   2 8.23802 7.76148   2
  18  -5  -2 2.31578 7.35728   1
 -18   5   2 3.33652 8.33823   3
  18   5  -2 -0.0084  7.0876   1
  17  -5  -2 3.13980 6.87115   1
 -17  -5   2 6.57178 8.01171   2
  17   5  -2 1.39114 6.98905   1
 -17   5   2 0.99144 8.05220   3
  16  -5  -2 5.96149 6.24354   1
 -16  -5   2 6.37792 7.40986   2
  16   5  -2 8.02232 7.71802   1
 -16   5   2 8.35667 8.12791   3
  15  -5  -2 92.8415 14.1783   1
 -15  -5   2 103.023  17.412   2
  15   5  -2 72.5700 13.2217   1
 -15   5   2 113.711  16.567   3
  14  -5  -2 -2.1751  4.7515   1
 -14  -5   2 -7.3780  5.7732   2
  14   5  -2 6.52402 7.02793   1
 -14   5   2 -1.8913  7.1143   3
  13  -5  -2 169.126  17.606   1
 -13  -5   2 205.620  21.910   2
  13   5  -2 171.149  18.085   1
 -13   5   2 163.565  19.815   3
  12  -5  -2 20.4119  6.9428   1
 -12  -5   2 -3.1297  4.6404   2
 -12   5   2 15.4739  8.1043   3
  12   5  -2 27.7627  7.8543   1
  11  -5  -2 334.927  19.953   1
 -11  -5   2 339.888  22.365   2
  11   5  -2 363.175  20.909   1
  10  -5  -2 96.2538 12.6366   1
 -10  -5   2 103.317  13.951   2
  10   5  -2 112.015  13.017   1
 -10   5   2 93.6988  8.8261   2
   9  -5  -2 486.170  23.494   1
  -9  -5   2 512.010  25.896   2
   9   5  -2 549.312  24.906   1
  -9   5   2 497.864  18.456   2
  -8  -5   2 30.3923  7.9614   1
  -8  -5   2 12.1404  5.8666   2
   8  -5  -2 32.2882  6.8109   1
   8   5  -2 25.6376  6.9366   1
  -8   5   2 25.3948  5.0450   2
   7  -5  -2 331.981  17.687   1
  -7  -5   2 324.380  18.834   1
  -7  -5   2 276.217  17.935   2
   7   5  -2 328.543  11.037   3
  -7   5   2 298.663  13.137   2
   7   5  -2 318.102  18.066   1
  -6  -5   2 74.6409 10.5709   2
  -6  -5   2 72.2822 10.5076   1
   6  -5  -2 79.9841 10.3159   1
   6   5  -2 83.5554  5.9552   3
   6   5  -2 85.8641 11.1881   1
  -6   5   2 82.3045  7.5104   2
   5  -5  -2 491.494  21.779   1
  -5  -5   2 506.973  22.845   2
  -5  -5   2 525.022  23.751   1
   5   5  -2 528.254  17.831   3
  -5   5   2 509.834  18.515   2
   5   5  -2 522.882  23.615   1
  -4  -5   2 21.3797  6.2912   2
   4  -5  -2 12.5466  5.0653   1
  -4  -5   2 15.8253  5.8215   1
  -4   5   2 21.5767  4.4516   2
   4   5  -2 18.7138  4.4098   3
   3  -5  -2 67.6768  7.6467   2
   3  -5  -2 50.6328  8.3928   1
  -3  -5   2 51.6194  7.7003   2
  -3  -5   2 70.0797  9.7473   1
   3   5  -2 80.6334  8.0813   3
   2  -5  -2 162.084  11.616   1
   2  -5  -2 135.025   9.614   2
  -2  -5   2 157.795  14.513   1
  -2  -5   2 125.903   9.715   2
   2   5  -2 149.912   9.839   3
   1  -5  -2 60.8618  7.7144   2
   1  -5  -2 57.4261  8.3320   1
  -1  -5   2 45.8003  8.2915   1
  -1  -5   2 62.7537  7.8939   2
   1   5  -2 56.2560  8.0870   3
   0  -5   2 158.132  14.610   1
   0  -5  -2 115.421  11.881   1
   0  -5   2 113.506   8.516   2
   0  -5  -2 101.222  10.282   2
   0   5  -2 131.513  11.923   3
  -1  -5  -2 161.191  13.690   1
   1  -5   2 128.290   8.688   2
   1  -5   2 161.558  14.860   1
  -1  -5  -2 141.917  12.454   2
  -1   5  -2 161.211  11.917   3
   2  -5   2 -0.6945  3.2901   1
  -2  -5  -2 0.88729 3.66340   2
   2  -5   2 -4.1030  2.0182   2
  -2  -5  -2 1.27372 3.36404   1
  -2   5  -2 -2.9714  4.2024   3
  -3  -5  -2 28.9260  6.9092   2
   3  -5   2 36.6184  7.6870   1
   3  -5   2 27.5607  4.4405   2
  -3  -5  -2 28.5775  6.3376   1
   3   5   2 30.3126  6.2567   1
  -3   5  -2 27.0929  6.6949   3
  -4  -5  -2 22.4355  5.9782   1
   4  -5   2 14.4051  5.7326   1
   4  -5   2 21.4489  3.8170   2
  -4  -5  -2 26.2195  6.2486   2
   4   5   2 27.0344  6.0757   1
  -4   5  -2 23.9554  6.7080   3
   5  -5   2 93.8019 11.4075   1
  -5  -5  -2 105.984   7.769   3
  -5  -5  -2 123.990  12.755   1
  -5  -5  -2 102.675  12.121   2
  -5   5  -2 118.532   6.149   2
   5   5   2 111.562  11.837   1
  -5   5  -2 127.111  13.847   3
  -6  -5  -2 218.991  14.871   1
  -6  -5  -2 221.530  15.451   2
  -6  -5  -2 196.494  10.084   3
   6  -5   2 240.554  16.033   1
  -6   5  -2 231.532   8.567   2
   6   5   2 194.479  13.202   1
  -6   5  -2 204.746  15.528   3
  -7  -5  -2 168.372  16.208   2
   7  -5   2 205.776  14.926   1
   7   5   2 184.100  13.279   1
  -7   5  -2 175.930  17.228   3
  -8  -5  -2 205.143  18.374   2
   8  -5   2 179.541  16.892   1
   8   5   2 167.308  15.217   1
  -8   5  -2 151.513  16.790   3
   9  -5   2 261.679  17.621   1
  -9  -5  -2 286.364  18.954   2
  -9   5  -2 265.157  18.914   3
   9   5   2 231.989  16.031   1
 -10  -5  -2 140.240  16.240   2
  10  -5   2 156.122  16.636   1
 -10   5  -2 162.817  18.138   3
  10   5   2 123.849  14.568   1
 -11  -5  -2 230.357  21.611   2
  11  -5   2 230.950  21.008   1
 -11   5  -2 210.217  21.150   3
  11   5   2 205.487  19.418   1
 -12  -5  -2 27.9766  9.1627   2
  12  -5   2 52.5140 11.0643   1
 -12   5  -2 50.8652 11.2265   3
  12   5   2 42.3600 10.6939   1
 -13  -5  -2 110.070  16.474   2
  13  -5   2 118.994  16.268   1
  13   5   2 86.4444 14.0981   1
 -13   5  -2 96.8368 15.5198   3
  14  -5   2 16.4608  7.8782   1
 -14  -5  -2 9.27706 8.15896   2
 -14   5  -2 4.57774 7.86623   3
  14   5   2 4.50241 7.12317   1
  15  -5   2 50.7411 12.2743   1
 -15  -5  -2 64.6521 13.8209   2
 -15   5  -2 38.1625 12.4905   3
  15   5   2 56.0846 12.8597   1
  16  -5   2 9.07117 8.17666   1
 -16  -5  -2 5.02441 8.27841   2
  16   5   2 21.5405 10.1467   1
 -16   5  -2 1.65093 8.31635   3
  17  -5   2 36.8258 11.9007   1
 -17  -5  -2 36.3668 11.8228   2
  17   5   2 20.5396 10.4123   1
 -17   5  -2 33.3385 12.1323   3
 -18  -5  -2 9.45500 9.32939   2
  18  -5   2 13.9924  8.5222   1
  18   5   2 11.2440  9.1089   1
 -18   5  -2  7.7614 10.0104   3
 -19  -5  -2 15.0715 12.4907   2
  19  -5   2 10.4111  8.8164   1
 -19   5  -2 13.9912 12.3404   3
  19   5   2 12.7675 10.0681   1
  20  -5   2 -1.2822  8.5489   1
 -20  -5  -2  2.3687 11.5894   2
  20   5   2  1.1297 10.0296   1
 -20   5  -2 5.79136 9.95656   3
  21  -5   2 -13.486   6.440   1
 -21  -5  -2 10.8934 12.0620   2
  21   5   2 12.6725 11.6131   1
 -21   5  -2 -14.865   7.866   3
  22  -5   2 -0.5653  8.9778   1
 -22  -5  -2  0.6009 10.5286   2
  22   5   2 20.3240 12.9359   1
 -22   5  -2 -19.570  10.567   3
 -23  -5  -2 -4.1315 11.7297   2
  23  -5   2 -1.7293 10.4842   1
 -23   5  -2 -13.114  11.966   3
  23   5   2 -15.021  10.670   1
 -24  -5  -2 -9.6986 10.3088   2
  24  -5   2  6.9752 11.2209   1
 -24   5  -2 -4.6818 13.4711   3
  24   5   2 -15.363  12.201   1
 -24  -6   2 -5.3386 13.6650   2
  24  -6  -2  9.7840 10.1252   1
  24   6  -2 -2.1803 11.0413   1
 -24   6   2 -11.607  11.617   3
 -23  -6   2 15.0927 12.3505   2
  23  -6  -2 35.7718 13.1732   1
  23   6  -2  6.7356 11.4692   1
 -23   6   2 22.2222 15.1808   3
  22  -6  -2 3.23963 9.36458   1
 -22  -6   2  3.1676 12.3314   2
  22   6  -2 -4.1816  9.9289   1
 -22   6   2  5.6715 10.4166   3
  21  -6  -2 12.8444  8.8904   1
 -21  -6   2 33.0887 13.3540   2
 -21   6   2 38.3022 13.6885   3
  21   6  -2 23.3777 14.2432   1
  20  -6  -2 2.07996 7.99102   1
 -20  -6   2 -4.8414  8.6997   2
  20   6  -2 1.40146 9.03856   1
 -20   6   2 13.8563 10.5704   3
 -19  -6   2 37.9065 13.0073   2
  19  -6  -2 59.2450 14.0919   1
  19   6  -2 46.0549 14.5343   1
 -19   6   2 40.7631 13.4949   3
 -18  -6   2 -2.6571  7.0212   2
  18  -6  -2 1.84715 6.35329   1
  18   6  -2 4.48278 7.96208   1
 -18   6   2 9.25791 8.98853   3
  17  -6  -2 69.3396 14.3634   1
 -17  -6   2 84.0080 16.3003   2
  17   6  -2 61.8118 13.9879   1
 -17   6   2 78.1770 15.8144   3
 -16  -6   2 28.4528 11.6036   2
  16  -6  -2 14.3664  8.6999   1
  16   6  -2 9.15311 7.96617   1
 -16   6   2 3.43445 8.02181   3
  15  -6  -2 49.3815 11.4315   1
 -15  -6   2 41.6084 11.8436   2
 -15   6   2 46.6605 12.4897   3
  15   6  -2 46.3418 11.6708   1
  14  -6  -2 0.80260 5.64637   1
 -14  -6   2 -4.0413  6.1302   2
  14   6  -2 14.1907  8.3957   1
 -14   6   2 -9.9682  5.9078   3
  13  -6  -2 58.3803 11.4144   1
 -13  -6   2 59.4248 12.7796   2
  13   6  -2 62.9782 11.9240   1
 -13   6   2 69.9874 14.6728   3
 -12  -6   2 22.1835  9.1345   2
  12  -6  -2 14.0681  7.0625   1
 -12   6   2 -3.0241  6.4312   3
  12   6  -2 18.1050  8.1954   1
  11  -6  -2 33.6935  8.7233   1
 -11  -6   2 24.1543  9.1034   2
  11   6  -2 35.5538  8.9542   1
 -11   6   2 24.1285  9.5468   3
  10  -6  -2 13.8357  7.0482   1
 -10  -6   2 -0.5740  4.9433   2
  10   6  -2 9.54826 5.79557   1
   9  -6  -2 0.14229 5.29736   1
  -9  -6   2 3.78322 5.14035   2
  -9  -6   2 -7.2949  4.7378   1
   9   6  -2 1.46242 4.70917   1
  -8  -6   2 -2.6282  4.3208   2
  -8  -6   2 -0.6168  4.8675   1
   8  -6  -2 -0.1905  4.3376   1
   8   6  -2 4.13924 5.01953   1
  -8   6   2 5.16730 3.68115   2
  -7  -6   2 108.279  13.727   1
   7  -6  -2 89.5547 12.1515   1
  -7  -6   2 91.8823 12.8155   2
  -7   6   2 109.115   9.220   2
   7   6  -2 109.061  13.795   1
   6  -6  -2 1.21056 4.59950   1
  -6  -6   2 0.33165 4.29722   2
  -6  -6   2 -0.8553  4.0555   1
  -6   6   2 1.00836 2.71804   2
   6   6  -2 8.98016 6.04752   1
  -5  -6   2 179.492  16.892   1
   5  -6  -2 176.704  15.958   1
  -5  -6   2 201.813  14.822   2
   5   6  -2 189.934  10.674   3
  -5   6   2 179.785  10.876   2
   5   6  -2 173.680  16.854   1
  -4  -6   2 37.7677  8.1250   2
  -4  -6   2 27.4772  7.4795   1
   4  -6  -2 21.4597  7.1039   1
   4   6  -2 33.5788  6.2077   3
   3  -6  -2 399.477  17.981   2
  -3  -6   2 405.098  19.948   2
   3  -6  -2 414.575  20.919   1
  -3  -6   2 454.224  23.027   1
   3   6  -2 412.369  18.189   3
  -2  -6   2 40.7222  8.0133   2
  -2  -6   2 24.7754  8.4871   1
   2  -6  -2 36.2187  6.9782   2
   2  -6  -2 38.5454  7.7479   1
   2   6  -2 41.5685  7.5087   3
   1  -6  -2 550.523  22.814   2
  -1  -6   2 550.931  22.680   2
   1  -6  -2 531.120  24.049   1
  -1  -6   2 571.564  26.368   1
   1   6  -2 553.189  23.114   3
   0  -6   2 117.369  11.088   2
   0  -6   2 98.4665 13.2706   1
   0  -6  -2 134.303  12.610   2
   0  -6  -2 122.320  13.112   1
   0   6  -2 116.630  12.702   3
   1  -6   2 805.360  33.001   1
  -1  -6  -2 815.624  31.377   1
   1  -6   2 806.642  27.539   2
  -1  -6  -2 827.622  30.806   2
  -1   6  -2 781.148  30.906   3
   2  -6   2 155.262   9.868   2
  -2  -6  -2 135.374  13.874   2
   2  -6   2 170.913  16.862   1
  -2  -6  -2 111.874  12.568   1
  -2   6  -2 157.484  15.220   3
  -3  -6  -2 567.443  25.449   2
   3  -6   2 574.409  20.351   2
  -3  -6  -2 588.105  25.901   1
   3  -6   2 547.997  26.606   1
   3   6   2 609.378  25.843   1
  -3   6  -2 570.467  26.460   3
  -4  -6  -2 34.1602  8.1791   1
   4  -6   2 42.9839  5.7804   2
  -4  -6  -2 41.5351  8.5604   2
   4  -6   2 29.6960  7.9694   1
   4   6   2 35.3810  7.7376   1
  -4   6  -2 40.1647  9.4532   3
  -5  -6  -2 159.100  15.721   1
   5  -6   2 177.419  17.395   1
  -5  -6  -2 147.555  15.553   2
   5   6   2 166.897  15.600   1
  -5   6  -2 164.581  17.329   3
  -6  -6  -2 2.48889 4.57637   1
   6  -6   2 -0.9682  3.7855   1
  -6  -6  -2 6.83501 5.32189   2
   6   6   2 5.10065 4.04009   1
  -6   6  -2 8.00789 5.49216   3
  -7  -6  -2 144.243  16.308   2
   7  -6   2 100.175  13.916   1
  -7   6  -2 114.998  15.735   3
   7   6   2 125.484  13.800   1
   8  -6   2 19.6566  7.6676   1
  -8  -6  -2 2.20721 4.75852   2
  -8   6  -2 31.9152  9.7850   3
   8   6   2 26.1052  7.9271   1
   9  -6   2 67.0581 11.7948   1
  -9  -6  -2 44.8909 10.6189   2
   9   6   2 57.7447 10.5498   1
  -9   6  -2 50.2321 11.6636   3
 -10  -6  -2 55.7543 12.2199   2
  10  -6   2 27.8186  8.4207   1
  10   6   2 17.6690  6.9348   1
 -10   6  -2 31.8265  9.9655   3
 -11  -6  -2 13.5118  7.6654   2
  11  -6   2 24.1892  8.3466   1
 -11   6  -2 36.5052 11.1792   3
  11   6   2 29.3348  8.7676   1
 -12  -6  -2 18.7870  8.7488   2
  12  -6   2 34.8974  9.7996   1
 -12   6  -2 28.1542 11.3688   3
  12   6   2 60.6725 12.2620   1
  13  -6   2 17.5198  8.1693   1
 -13  -6  -2 9.30576 7.87785   2
  13   6   2 0.21526 6.13282   1
 -13   6  -2 1.38229 8.79752   3
  14  -6   2 -7.3582  5.6630   1
 -14  -6  -2 -0.9648  6.3438   2
  14   6   2 -3.1380  6.4466   1
 -14   6  -2 4.82028 8.32075   3
 -15  -6  -2 22.0065 10.9804   2
  15  -6   2 37.8963 10.3875   1
  15   6   2 21.9237  9.8432   1
 -15   6  -2 2.97638 8.74398   3
  16  -6   2 2.68774 7.07667   1
 -16  -6  -2 -10.867   5.938   2
 -16   6  -2 -5.9054  8.1454   3
  16   6   2 12.2355 10.0399   1
 -17  -6  -2 19.5730 11.8081   2
  17  -6   2 34.1252 11.4081   1
 -17   6  -2 59.9294 15.0676   3
  17   6   2 32.2631 11.8229   1
 -18  -6  -2 -10.449   7.959   2
  18  -6   2 11.5541  8.9280   1
  18   6   2 -9.0913  8.7668   1
 -18   6  -2 -3.5136  7.9463   3
  19  -6   2 24.3941 10.3861   1
 -19  -6  -2 27.8947 13.1514   2
  19   6   2 42.6147 15.0553   1
 -19   6  -2 21.0952 12.1327   3
  20  -6   2 12.7045  9.1618   1
 -20  -6  -2 -4.0459 11.0997   2
  20   6   2  2.1383 10.2104   1
 -20   6  -2 -11.604   9.381   3
  21  -6   2 62.1538 17.3405   1
 -21  -6  -2  3.2855 11.0390   2
  21   6   2 11.8689 13.3278   1
 -21   6  -2 28.3417 16.3134   3
  22  -6   2 2.11199 8.95289   1
 -22  -6  -2  8.1273 14.4280   2
 -22   6  -2 -6.1091 11.5812   3
  22   6   2  1.5809 11.9815   1
 -23  -6  -2  7.1845 14.1127   2
  23  -6   2 18.4700 12.5602   1
 -23   6  -2  2.7528 12.7191   3
  23   6   2 12.7630 16.5847   1
 -23  -7   2 -1.3941 13.9992   2
  23  -7  -2 13.1503 12.6138   1
  23   7  -2 -17.025  10.764   1
 -23   7   2 -11.809  13.162   3
  22  -7  -2 -4.9448 10.2569   1
 -22  -7   2  7.8990 13.6919   2
  22   7  -2 -14.949  11.170   1
 -22   7   2 -7.9042 12.3524   3
 -21  -7   2 -4.7465  9.3241   2
  21  -7  -2 -6.4426  7.6997   1
  21   7  -2  4.3049 10.3181   1
 -21   7   2 12.2078 12.8335   3
 -20  -7   2  7.4051 10.8406   2
  20  -7  -2 -4.1619  7.4527   1
 -20   7   2 -6.9500  8.4027   3
  20   7  -2 -6.5586  8.9810   1
  19  -7  -2 6.38559 8.70058   1
 -19  -7   2  3.1980 10.9263   2
 -19   7   2 -5.4475  8.2768   3
  19   7  -2 -4.0494  8.3099   1
 -18  -7   2 -9.4358  7.0672   2
  18  -7  -2 13.0916  8.6138   1
  18   7  -2 -2.0378  9.8260   1
 -18   7   2 1.96833 8.41003   3
  17  -7  -2 7.18036 8.18220   1
 -17  -7   2 15.1334 11.2482   2
 -17   7   2 6.91974 8.87323   3
  17   7  -2 16.5662  9.7433   1
  16  -7  -2 4.31160 6.27469   1
 -16  -7   2 15.7079  9.3070   2
  16   7  -2 -1.4098  7.6084   1
 -16   7   2 0.54367 7.90488   3
  15  -7  -2 29.0251  9.5679   1
 -15  -7   2 17.2710 10.9688   2
 -15   7   2 61.6855 14.9680   3
  15   7  -2 25.6798 10.2098   1
 -14  -7   2 17.7184  9.7007   2
  14  -7  -2 -3.3267  5.4029   1
 -14   7   2 2.14885 8.37512   3
  14   7  -2 3.20387 8.63879   1
 -13  -7   2 217.015  23.907   2
  13  -7  -2 173.976  19.569   1
 -13   7   2 162.738  21.047   3
  13   7  -2 139.689  18.412   1
 -12  -7   2 14.5861  8.3880   2
  12  -7  -2 7.30660 7.38139   1
 -12   7   2 -4.1069  8.2200   3
  12   7  -2 5.46899 6.91226   1
  11  -7  -2 358.006  23.507   1
 -11  -7   2 346.775  24.264   2
 -11   7   2 365.016  26.113   3
  11   7  -2 350.805  23.174   1
 -10  -7   2 8.38063 6.67099   2
 -10  -7   2 3.40864 7.05452   1
  10  -7  -2 6.14700 6.81877   1
  10   7  -2 18.0905  7.7599   1
 -10   7   2 4.45475 7.63939   3
   9  -7  -2 254.793  18.927   1
  -9  -7   2 266.844  24.624   1
  -9  -7   2 268.078  20.283   2
   9   7  -2 280.405  20.188   1
   8  -7  -2 8.01357 5.44384   1
  -8  -7   2 -0.4366  5.1874   2
  -8  -7   2 2.71797 6.02562   1
   8   7  -2 -3.0266  4.5190   1
  -7  -7   2 129.998  16.427   1
  -7  -7   2 160.740  17.530   2
   7  -7  -2 137.099  16.637   1
   7   7  -2 154.780  16.920   1
  -6  -7   2 2.12181 6.28838   1
  -6  -7   2 0.33963 4.55716   2
   6  -7  -2 11.6844  6.2952   1
  -6   7   2 8.33674 3.95408   2
   6   7  -2 -0.5402  6.3092   1
  -5  -7   2 209.186  19.484   1
   5  -7  -2 186.224  17.833   1
  -5  -7   2 179.776  17.544   2
  -5   7   2 201.921  12.207   2
   5   7  -2 167.478  17.768   1
  -4  -7   2 3.08876 6.11633   1
   4  -7  -2 5.45842 5.22702   1
  -4  -7   2 -2.0018  3.3798   2
   4   7  -2 3.25934 4.46483   3
   3  -7  -2 222.374  13.805   2
  -3  -7   2 193.264  17.505   2
  -3  -7   2 202.019  19.369   1
   3  -7  -2 227.619  16.375   1
   3   7  -2 193.189  13.390   3
  -2  -7   2 5.76139 4.60849   2
  -2  -7   2 4.94903 5.59689   1
   2  -7  -2 8.24771 4.57946   2
   2  -7  -2 4.43685 5.73767   1
   2   7  -2 16.7827  5.9889   3
  -1  -7   2 81.2035 10.6080   2
  -1  -7   2 75.7795 12.1864   1
   1  -7  -2 65.5270  9.9908   2
   1  -7  -2 80.0293 11.7271   1
   1   7  -2 72.3119 10.6606   3
   0  -7   2 14.1782  7.0468   1
   0  -7  -2 13.0972  6.9456   1
   0  -7   2 19.7191  6.0035   2
   0  -7  -2 18.1604  6.4830   2
   0   7  -2 16.0998  6.7888   3
  -1  -7  -2 0.57669 4.82660   1
   1  -7   2 -1.8164  3.7638   2
  -1  -7  -2 -1.8899  3.6681   2
   1  -7   2 11.0876  6.6640   1
  -1   7  -2 1.95421 4.04003   3
  -2  -7  -2 -1.1648  4.9458   1
   2  -7   2 9.78625 6.14502   1
   2  -7   2 -6.5047  2.8801   2
  -2  -7  -2 -3.1028  4.0312   2
  -2   7  -2 6.78348 6.25049   3
  -3  -7  -2 32.9787  8.3383   2
   3  -7   2 26.5775  8.3168   1
  -3  -7  -2 25.7698  7.1043   1
   3   7   2 15.8225  6.1837   1
  -3   7  -2 25.2032  8.3018   3
  -4  -7  -2 -2.7783  3.8200   1
   4  -7   2 -1.7651  4.9398   1
  -4  -7  -2 5.87122 5.10035   2
  -4   7  -2 -7.2653  4.4677   3
   4   7   2 1.59891 4.62667   1
  -5  -7  -2 155.681  17.403   2
  -5  -7  -2 154.510  16.883   1
   5  -7   2 162.093  18.739   1
  -5   7  -2 190.133  19.786   3
   5   7   2 172.784  17.000   1
  -6  -7  -2 -4.3309  4.3460   1
  -6  -7  -2 11.8135  6.5367   2
   6  -7   2 -4.8040  4.4290   1
  -6   7  -2 -5.3539  5.0477   3
   6   7   2 8.85416 5.67764   1
   7  -7   2 257.379  23.676   1
  -7  -7  -2 241.292  21.671   1
  -7  -7  -2 238.004  21.906   2
  -7   7  -2 252.959  23.950   3
   7   7   2 240.022  17.572   1
  -8  -7  -2 13.6247  7.6401   2
   8  -7   2 8.60998 6.79123   1
   8   7   2 4.97879 5.56927   1
  -8   7  -2 27.2127 10.0426   3
  -9  -7  -2 146.685  18.522   2
   9  -7   2 193.943  20.721   1
   9   7   2 182.637  18.129   1
  -9   7  -2 130.793  18.423   3
 -10  -7  -2 19.5883  9.4677   2
  10  -7   2 -2.6128  5.0286   1
  10   7   2 -1.9269  6.5264   1
 -10   7  -2 -4.3812  6.0135   3
  11  -7   2 233.103  23.430   1
 -11  -7  -2 183.980  21.921   2
 -11   7  -2 229.747  24.904   3
  11   7   2 183.752  19.529   1
 -12  -7  -2 -3.4094  7.5930   2
  12  -7   2 -7.1313  6.7005   1
 -12   7  -2 -11.727   5.481   3
  12   7   2 -8.3587  4.9495   1
  13  -7   2 78.8560 15.0848   1
 -13  -7  -2 80.5042 15.5632   2
 -13   7  -2 75.8498 14.6787   3
  13   7   2 58.3794 12.5604   1
  14  -7   2 0.83416 7.29351   1
 -14  -7  -2 -10.312   5.679   2
  14   7   2 -4.3234  6.1636   1
 -14   7  -2 2.66998 8.62494   3
  15  -7   2 44.5440 12.6739   1
 -15  -7  -2 44.7156 13.1037   2
 -15   7  -2 93.9211 17.9732   3
  15   7   2 54.6122 13.8856   1
  16  -7   2 -2.2816  6.3105   1
 -16  -7  -2 -1.7385  7.3662   2
  16   7   2 1.42846 9.72581   1
 -16   7  -2 -16.136   7.602   3
 -17  -7  -2 37.0079 13.7535   2
  17  -7   2 21.3422 10.5692   1
 -17   7  -2 1.08775 9.61401   3
  17   7   2 22.7476 10.5926   1
  18  -7   2 -6.7631  8.7523   1
 -18  -7  -2 -4.1645  8.6352   2
 -18   7  -2 -11.649  11.340   3
  18   7   2 -6.6288  8.4846   1
 -19  -7  -2 17.3587 12.4179   2
  19  -7   2 17.5674 11.0780   1
 -19   7  -2 19.2913 12.4510   3
  19   7   2  2.4878 13.1824   1
 -20  -7  -2 -0.3816 10.7914   2
  20  -7   2 -2.4137  8.1516   1
  20   7   2 -8.8243 11.9278   1
 -20   7  -2 -17.438  11.475   3
 -21  -7  -2 20.2659 13.1394   2
  21  -7   2 -4.1391 10.6438   1
 -21   7  -2 -10.582  10.224   3
  21   7   2  9.4093 12.8436   1
  22  -7   2 11.3216 11.2431   1
 -22  -7  -2 13.0504 13.9609   2
  22   7   2 -20.268  13.150   1
 -22   7  -2  3.2117 16.2148   3
 -21  -8   2 16.1129 15.3033   2
  21   8  -2 28.5837 15.7532   1
 -21   8   2 32.0186 14.1979   3
 -20  -8   2  3.5715 12.7613   2
  20  -8  -2 7.64601 9.42891   1
 -20   8   2 19.4391 11.3366   3
  20   8  -2 22.2422 12.8022   1
  19  -8  -2 22.2409 12.3894   1
 -19  -8   2 18.8776 12.7118   2
 -19   8   2 42.7524 15.9617   3
  19   8  -2 18.2732 13.0820   1
  18  -8  -2 -1.3784  8.9373   1
 -18  -8   2 -9.0883  8.3592   2
 -18   8   2  9.3863 10.6178   3
  18   8  -2 1.49078 9.64408   1
 -17  -8   2 24.8397 12.2725   2
  17  -8  -2 30.5288 12.8251   1
 -17   8   2 42.8591 15.8653   3
  17   8  -2 24.6490 12.8880   1
 -16  -8   2 -2.7163  7.9843   2
  16  -8  -2 -5.4103  6.7676   1
  16   8  -2  6.4148 10.4041   1
 -16   8   2 7.27582 9.01954   3
 -15  -8   2 27.3456 12.1348   2
  15  -8  -2 44.4851 13.2236   1
 -15   8   2 73.3272 16.7162   3
  15   8  -2 35.5890 12.5322   1
 -14  -8   2 4.76000 8.48156   2
  14  -8  -2 2.82616 7.83593   1
 -14   8   2 1.95743 8.93028   3
  14   8  -2 1.51627 8.90359   1
  13  -8  -2 31.8007 10.0802   1
 -13  -8   2 12.8133 10.4755   2
  13   8  -2 17.2953  9.6204   1
 -13   8   2 30.6065 11.6466   3
  12  -8  -2 1.77251 6.65095   1
 -12  -8   2 7.27606 7.78738   2
 -12   8   2 -4.3586  6.0131   3
  12   8  -2 -2.2522  5.9243   1
  11  -8  -2 9.39820 8.16036   1
 -11  -8   2 13.4549  8.3865   2
 -11   8   2 11.9726  9.2785   3
  11   8  -2 20.8254  9.1574   1
 -10  -8   2 -1.7114  6.2957   2
 -10  -8   2 0.78690 6.56002   1
  10  -8  -2 8.35941 6.55582   1
  10   8  -2 9.10246 7.21250   1
 -10   8   2 -4.2222  6.8060   3
  -9  -8   2 0.25304 5.65771   2
   9  -8  -2 0.61329 5.82100   1
  -9  -8   2 -10.081   4.949   1
   9   8  -2 9.95451 7.87562   1
  -9   8   2 -3.3214  6.0534   3
   8  -8  -2 16.9534  8.9099   1
  -8  -8   2 43.4331 10.7380   2
  -8  -8   2 30.8079  9.6904   1
   8   8  -2 23.9914  9.2308   1
  -8   8   2 45.4308 12.5041   3
   7  -8  -2 80.8222 14.5918   1
  -7  -8   2 48.8223 11.2443   2
  -7  -8   2 67.0459 13.3572   1
   7   8  -2 32.1734 10.1322   1
  -6  -8   2 -2.7684  5.4122   2
   6  -8  -2 3.11490 5.56166   1
  -6  -8   2 -0.6870  5.9633   1
   6   8  -2 -3.2496  6.0477   1
   5  -8  -2 56.5691 11.2891   1
  -5  -8   2 74.0080 12.2903   2
  -5  -8   2 46.2789 10.6077   1
   5   8  -2 81.5575 14.3084   1
   4  -8  -2 -8.0880  5.1291   1
  -4  -8   2 -0.2572  4.8287   2
  -4  -8   2 8.13494 6.51391   1
  -3  -8   2 116.001  14.514   2
   3  -8  -2 127.750  13.409   2
  -3  -8   2 129.286  16.826   1
   3  -8  -2 109.706  15.496   1
   2  -8  -2 4.88452 5.29493   2
  -2  -8   2 -0.0911  5.5912   1
   2  -8  -2 10.0765  5.8893   1
  -2  -8   2 8.08051 5.68794   2
   2   8  -2 15.4256  6.6281   3
   1  -8  -2 123.611  15.575   1
  -1  -8   2 166.282  15.809   2
   1  -8  -2 155.032  15.581   2
  -1  -8   2 137.413  17.292   1
   1   8  -2 119.829  14.348   3
   0  -8  -2 8.51655 5.15738   2
   0  -8  -2 17.7943  7.7424   1
   0  -8   2 11.8377  5.8438   2
   0  -8   2 29.6056 10.2660   1
   0   8  -2 6.01509 5.91571   3
  -1  -8  -2 173.348  18.098   1
  -1  -8  -2 173.520  16.877   2
   1  -8   2 186.822  20.896   1
  -1   8  -2 177.052  18.207   3
  -2  -8  -2 39.2310  9.9790   1
   2  -8   2 18.5668  8.7705   1
  -2  -8  -2 42.8448 10.1082   2
  -2   8  -2 25.4338  8.7248   3
   3  -8   2 212.143  21.861   1
  -3  -8  -2 174.686  18.400   2
  -3  -8  -2 171.901  18.314   1
   3   8   2 198.880  19.796   1
  -3   8  -2 188.766  19.733   3
  -4  -8  -2 22.0874  7.9103   1
  -4  -8  -2 -0.9844  6.2357   2
   4  -8   2 14.4653  7.8041   1
   4   8   2 29.8540  8.9758   1
  -4   8  -2 33.5300  9.7594   3
  -5  -8  -2 127.300  16.531   1
   5  -8   2 165.345  19.431   1
  -5  -8  -2 94.8710 15.0170   2
  -5   8  -2 112.053  15.983   3
   5   8   2 132.206  15.967   1
  -6  -8  -2 1.36822 6.63215   2
   6  -8   2 -0.3880  6.8343   1
  -6  -8  -2 -8.4553  4.3074   1
  -6   8  -2 1.35088 6.59445   3
   6   8   2 0.52640 5.26190   1
   7  -8   2 112.204  17.322   1
  -7  -8  -2 115.113  17.068   2
  -7  -8  -2 98.7899 15.1488   1
   7   8   2 111.150  14.972   1
  -7   8  -2 120.011  17.615   3
   8  -8   2 7.83127 7.48408   1
  -8  -8  -2 7.64986 7.14121   2
   8   8   2 -2.3496  4.9954   1
  -8   8  -2 -6.2588  6.0767   3
   9  -8   2 33.8559 10.3506   1
  -9  -8  -2 19.9630  9.1472   2
  -9   8  -2 24.0088 10.1104   3
   9   8   2 36.9376 10.0044   1
  10  -8   2 -2.6772  7.7497   1
 -10  -8  -2 -1.1864  6.7124   2
  10   8   2 -4.0707  7.4436   1
 -10   8  -2 -4.8514  7.0184   3
  11  -8   2 -5.4349  5.2566   1
 -11  -8  -2 6.30213 7.88084   2
 -11   8  -2 14.7306 10.9460   3
  11   8   2 -1.4701  6.5530   1
  12  -8   2 13.5425  8.4319   1
 -12  -8  -2 -4.0748  5.9449   2
  12   8   2 7.35963 7.61336   1
 -12   8  -2 -4.1684  7.6032   3
  13  -8   2 7.05803 7.60887   1
 -13  -8  -2 9.69699 8.75784   2
  13   8   2 2.49654 8.73607   1
 -13   8  -2 -7.3742  7.7611   3
 -14  -8  -2 -0.4323  8.0447   2
  14  -8   2 5.46581 8.25875   1
  14   8   2 12.5766 10.6095   1
 -14   8  -2 -4.7636  9.9970   3
 -15  -8  -2 7.94036 9.36257   2
  15  -8   2 -11.282   7.855   1
  15   8   2 1.17036 7.88456   1
 -15   8  -2 0.80027 9.41380   3
 -16  -8  -2  4.7384 10.6955   2
  16  -8   2 -11.116   7.969   1
  16   8   2 2.85201 8.67033   1
 -16   8  -2 -15.216   7.476   3
 -17  -8  -2 17.6698 13.9004   2
  17  -8   2  2.5936 11.0313   1
 -17   8  -2 13.5797 12.7655   3
  17   8   2 0.27210 8.19872   1
 -18  -8  -2  0.3750 11.7810   2
  18  -8   2 -3.4943  8.3180   1
 -18   8  -2 -3.3645 11.2868   3
  18   8   2 -2.9588 11.3859   1
  19  -8   2 10.5855 11.6420   1
 -19  -8  -2 21.4122 13.5007   2
  19   8   2 12.1424 12.4976   1
 -19   8  -2 20.9128 16.0016   3
 -20  -8  -2 -0.2400 12.7263   2
  20  -8   2 11.6430 10.7489   1
  20   8   2 -5.9301 11.9265   1
 -20   8  -2 -11.235  10.327   3
 -19  -9   2 -19.817  10.252   2
 -19   9   2 14.9652 12.7219   3
  19   9  -2 -3.6148  9.5160   1
 -18  -9   2  2.5953 11.0396   2
 -18   9   2 13.0775 13.1792   3
  18   9  -2 -10.950   7.918   1
 -17  -9   2 10.8425 11.7079   2
 -17   9   2 27.8463 13.2605   3
  17   9  -2 9.89210 9.74191   1
 -16  -9   2 11.3435 10.7750   2
  16  -9  -2  6.6343 10.3407   1
  16   9  -2 -4.7775  8.8877   1
 -16   9   2 1.33093 9.52827   3
 -15  -9   2 14.5223 11.0524   2
  15  -9  -2  3.4773 10.3980   1
 -15   9   2 30.3648 12.4955   3
  15   9  -2  6.0400 10.1354   1
  14  -9  -2 -1.6926  7.7595   1
 -14  -9   2 -2.8595 10.0005   2
 -14   9   2 9.51069 9.27146   3
  14   9  -2 -2.5511  9.8255   1
  13  -9  -2 64.6740 14.7234   1
 -13  -9   2 25.8131 11.5969   2
 -13   9   2 49.6325 14.4796   3
  13   9  -2 40.3326 13.3157   1
  12  -9  -2 5.57518 9.10931   1
 -12  -9   2 5.49263 8.33671   2
  12   9  -2 -3.0263  7.2701   1
 -12   9   2 -1.3034  8.4176   3
 -11  -9   2 42.4120 12.5483   2
  11  -9  -2 37.0061 11.9778   1
 -11   9   2 36.6643 12.3497   3
  11   9  -2 61.8245 12.9983   1
  10  -9  -2 10.0073  8.1840   1
 -10  -9   2 15.4313  9.1924   2
 -10  -9   2 11.6230  8.7538   1
 -10   9   2 5.26852 8.54659   3
  10   9  -2 2.65640 6.92710   1
  -9  -9   2 43.9370 12.9301   1
   9  -9  -2 67.5658 14.1672   1
  -9  -9   2 44.0889 12.0479   2
   9   9  -2 63.6796 13.3593   1
  -9   9   2 28.5104 11.6375   3
  -8  -9   2 11.4052  7.4518   2
  -8  -9   2 21.6030  9.6603   1
   8  -9  -2 30.7448 10.3506   1
   8   9  -2 19.9486  9.4228   1
  -8   9   2 18.4882  9.4009   3
   7  -9  -2 128.539  18.475   1
  -7  -9   2 134.414  18.783   1
  -7  -9   2 143.438  18.867   2
   7   9  -2 121.252  18.115   1
  -7   9   2 148.542  20.757   3
  -6  -9   2 19.0739  9.4539   1
  -6  -9   2 33.4258 10.7381   2
   6  -9  -2 23.4773  9.2222   1
   6   9  -2 42.9570 11.8567   1
  -6   9   2 37.4060 11.3383   3
  -5  -9   2 130.673  17.965   1
   5  -9  -2 93.4445 15.0906   1
  -5  -9   2 70.6733 13.0324   2
  -5   9   2 71.8122 14.1851   3
   5   9  -2 100.079  16.234   1
  -4  -9   2 20.8671  8.8883   2
   4  -9  -2 5.37378 6.92602   1
  -4  -9   2 20.2768  9.9098   1
  -4   9   2 31.1527  9.6918   3
   3  -9  -2 46.4019 11.7432   1
  -3  -9   2 35.3453  9.5841   2
  -3  -9   2 46.9279 12.4873   1
  -3   9   2 73.2241 14.8009   3
  -2  -9   2 2.10942 6.75629   1
  -2  -9   2 14.2552  7.0632   2
   2  -9  -2 12.5335  8.9749   1
  -2   9   2 17.7183  7.7932   3
  -1  -9   2 11.1386  8.0628   1
   1  -9  -2 9.02018 6.04837   2
   1  -9  -2 27.8445  9.9422   1
   1   9  -2 15.7996  7.6422   3
   0  -9  -2 3.93398 6.35431   2
   0  -9   2 -3.6103  6.0810   1
   0  -9  -2 -0.6020  6.2827   1
   0   9  -2 6.23182 7.13943   3
  -1  -9  -2 -1.9035  6.2132   1
   1  -9   2 17.4420  8.6181   1
  -1  -9  -2 6.36753 6.82610   2
  -1   9  -2 2.37950 7.04455   3
   2  -9   2 -3.4211  6.1613   1
  -2  -9  -2 -3.3880  4.7517   2
  -2  -9  -2 1.79154 5.90760   1
   2   9   2 -1.5059  5.4005   1
  -2   9  -2 1.64211 6.24961   3
  -3  -9  -2 -1.3967  6.7362   1
   3  -9   2 -1.5712  6.2926   1
  -3  -9  -2 -1.2692  6.0352   2
  -3   9  -2 -1.1555  7.5131   3
   3   9   2 2.70467 7.34694   1
  -4  -9  -2 -0.2866  6.9525   2
   4  -9   2 12.7689 10.0097   1
  -4  -9  -2 7.99004 6.91269   1
  -4   9  -2 20.2425  9.8397   3
   4   9   2 13.5406  7.8087   1
  -5  -9  -2 9.83723 7.45338   2
   5  -9   2 21.7426  9.3132   1
  -5  -9  -2 25.3174  9.1848   1
  -5   9  -2 19.5356  9.1240   3
   5   9   2 14.3422  7.8558   1
  -6  -9  -2 60.0234 12.8329   1
  -6  -9  -2 20.9239  9.9628   2
   6  -9   2 35.0449 10.8557   1
  -6   9  -2 38.5184 11.5408   3
   6   9   2 26.7883  9.1988   1
  -7  -9  -2 86.6209 14.9003   2
  -7  -9  -2 100.555  16.084   1
   7  -9   2 97.9372 17.1642   1
   7   9   2 92.5323 14.6895   1
  -7   9  -2 65.3285 14.5990   3
   8  -9   2 21.1432 10.6210   1
  -8  -9  -2 9.31942 9.35348   2
   8   9   2 19.1982  8.3063   1
  -8   9  -2 29.7908 12.4814   3
   9  -9   2 79.3605 15.7962   1
  -9  -9  -2 82.5114 16.2433   2
   9   9   2 89.8014 15.4711   1
  -9   9  -2 96.1321 18.3242   3
 -10  -9  -2 33.7277 12.2515   2
  10  -9   2 7.19403 8.48387   1
 -10   9  -2 26.3037 11.2380   3
  10   9   2 23.8359  9.5152   1
  11  -9   2 15.3381 10.7942   1
 -11  -9  -2 41.5729 12.8309   2
 -11   9  -2 60.6877 14.9384   3
  11   9   2 -0.5446  7.4827   1
 -12  -9  -2 2.99638 8.45088   2
  12  -9   2 15.1292  8.8650   1
 -12   9  -2 7.07061 9.83048   3
  12   9   2 15.1423  9.6768   1
 -13  -9  -2 13.4926  9.5751   2
  13  -9   2 25.4234 11.2932   1
 -13   9  -2 2.59355 9.13560   3
  13   9   2 18.0464 11.1841   1
 -14  -9  -2 8.35421 9.20553   2
  14  -9   2 4.39078 8.54064   1
 -14   9  -2  0.8387 11.9655   3
  14   9   2 3.21426 8.27844   1
 -15  -9  -2 19.3815 13.5261   2
  15  -9   2  6.6544 11.4542   1
  15   9   2 16.8378 11.3904   1
 -15   9  -2 19.6202 13.3579   3
  16  -9   2 20.5578 13.6406   1
 -16  -9  -2 15.0095 11.0340   2
  16   9   2 -0.6620  9.4683   1
 -16   9  -2 -5.7779 10.5076   3
 -17  -9  -2  8.5322 11.2396   2
  17  -9   2  2.5089 11.0263   1
 -17   9  -2  3.8278 12.0692   3
  17   9   2 -3.6589 11.0921   1
 -18  -9  -2 -1.2305 10.9077   2
  18  -9   2 19.7999 13.1136   1
 -18   9  -2 -6.3802 11.8315   3
  18   9   2 -0.9211 10.1953   1
 -17 -10   2 -1.3508 10.0625   2
  17  10  -2 13.6038 11.2207   1
 -17  10   2 15.6324 13.9338   3
 -16 -10   2 13.0974 11.6362   2
  16  10  -2  5.8483 10.5624   1
 -16  10   2 11.7584 12.9861   3
 -15 -10   2 13.5721 13.0198   2
  15  10  -2 -2.4631 10.4026   1
 -15  10   2  7.7308 11.8866   3
 -14 -10   2 1.15234 8.69468   2
 -14  10   2 11.2342 11.4147   3
  14  10  -2 0.57658 9.79188   1
 -13 -10   2  1.8308 10.6738   2
  13  10  -2 9.42257 9.43149   1
 -13  10   2 14.7958 12.1054   3
 -12 -10   2 -6.1285  9.1111   2
 -12  10   2 20.0092 11.3220   3
  12  10  -2 -12.504   6.872   1
  11 -10  -2 -4.9754  9.0254   1
 -11 -10   2 15.8356  9.4875   2
  11  10  -2 8.53162 8.39069   1
 -11  10   2 1.60517 7.95975   3
 -10 -10   2 4.12310 9.29455   2
  10 -10  -2 -0.5235  8.2476   1
 -10 -10   2 -1.4068  9.1707   1
 -10  10   2 1.73978 7.57551   3
  10  10  -2 0.00283 8.00649   1
  -9 -10   2 -3.4227  6.7291   2
   9 -10  -2 -2.9453  6.8282   1
  -9 -10   2 -1.9093  7.2813   1
   9  10  -2 5.09168 8.02421   1
  -9  10   2 10.6349 11.0764   3
  -8 -10   2 -4.0575  7.8315   2
   8 -10  -2 12.7536  9.6076   1
  -8 -10   2 2.32558 8.85204   1
   8  10  -2 14.4087  9.2228   1
  -8  10   2 -2.0651  6.7615   3
  -7 -10   2 14.7144 11.0052   1
  -7 -10   2 8.06094 8.13128   2
   7 -10  -2 0.52333 8.66906   1
  -7  10   2 11.2815  8.9512   3
   7  10  -2 11.5501 10.0765   1
  -6 -10   2 12.0370  8.6458   1
  -6 -10   2 14.2479  9.0696   2
   6 -10  -2 16.2065  9.0210   1
   6  10  -2 10.9345  8.4978   1
  -6  10   2 17.6146  9.4856   3
   5 -10  -2 53.3205 12.7085   1
  -5 -10   2 29.3674 10.1029   2
  -5 -10   2 35.3627 12.5912   1
   5  10  -2 24.8288 10.4545   1
  -5  10   2 32.8130 11.0952   3
  -4 -10   2 12.9992  9.0109   1
  -4 -10   2 37.9874 11.5188   2
   4 -10  -2 27.8756 11.4351   1
   4  10  -2 28.4659 10.8310   1
  -4  10   2 21.8084 10.4865   3
   3 -10  -2 23.2140 10.2574   1
  -3 -10   2 32.9421 11.3400   1
  -3  10   2 28.5014 10.0530   3
   2 -10  -2 41.0897 12.3353   1
  -2 -10   2 17.8247 10.9360   1
  -2  10   2 37.5077 11.2177   3
  -1 -10   2 43.2940 12.2594   1
   1 -10  -2 37.5332 12.0244   1
  -1  10   2 42.7967 11.8010   3
   0 -10   2 10.7118  9.2988   1
   0 -10  -2 33.1632 11.6843   1
   1 -10   2 49.4006 13.8615   1
  -1 -10  -2 51.4208 11.7490   2
  -1 -10  -2 50.5442 12.3340   1
  -1  10  -2 25.7613  9.8089   3
  -2 -10  -2 32.4664  9.6728   2
  -2 -10  -2 36.3516 11.2347   1
   2 -10   2 45.8379 13.2856   1
  -2  10  -2 31.9419 11.1907   3
   2  10   2 22.2166  9.5308   1
   3 -10   2 53.2863 14.1418   1
  -3 -10  -2 57.6827 12.9455   1
  -3 -10  -2 49.4311 12.5553   2
  -3  10  -2 41.6910 11.7671   3
   3  10   2 86.6309 15.5656   1
  -4 -10  -2 55.3288 13.5276   2
  -4 -10  -2 31.9405 11.7156   1
   4 -10   2 48.2047 13.2979   1
  -4  10  -2 44.7107 13.1123   3
   4  10   2 34.8460 11.9670   1
   5 -10   2 52.7189 13.5188   1
  -5 -10  -2 27.0367 10.0684   2
  -5 -10  -2 33.0652 11.4326   1
   5  10   2 47.6055 12.9737   1
  -5  10  -2 64.7338 14.7711   3
  -6 -10  -2 6.15991 7.88690   1
   6 -10   2 0.44217 8.17498   1
  -6 -10  -2 35.8028 10.9726   2
  -6  10  -2 23.0495  9.5402   3
   6  10   2 29.4777 10.1872   1
  -7 -10  -2 30.7893 12.4903   2
  -7 -10  -2 25.5069 11.4000   1
   7 -10   2 23.9283 11.3659   1
  -7  10  -2 12.1539 11.1125   3
   7  10   2 10.9431  9.2200   1
  -8 -10  -2 11.0431  9.5652   2
   8 -10   2 7.08729 8.97087   1
   8  10   2 13.8578  7.9916   1
  -8  10  -2 10.1754  9.7726   3
  -9 -10  -2 11.1009  8.2434   2
   9 -10   2 -0.6306  7.3471   1
   9  10   2 -3.7737  7.1546   1
  -9  10  -2 -0.7651  8.7950   3
 -10 -10  -2 14.1972  9.3371   2
  10 -10   2 -0.1813  9.1398   1
 -10  10  -2 -11.519   8.379   3
  10  10   2 10.9296  8.0872   1
  11 -10   2  1.5777 10.2612   1
 -11 -10  -2 15.5994 11.2444   2
  11  10   2 -5.5807  6.7814   1
 -11  10  -2  8.6486 11.3494   3
  12 -10   2  5.3694 10.8146   1
 -12 -10  -2 -0.0178  8.7766   2
 -12  10  -2  1.8840 10.3705   3
  12  10   2 -10.839   7.170   1
  13 -10   2 -10.557  10.323   1
 -13 -10  -2 17.6565 11.3325   2
  13  10   2 -1.5833  8.1489   1
 -13  10  -2 -19.068  11.779   3
 -14 -10  -2 -0.3793  9.1747   2
  14 -10   2  2.8131 11.6439   1
 -14  10  -2  3.2682 11.8054   3
  14  10   2  4.6592 10.9916   1
 -15 -10  -2  9.2278 13.2552   2
  15 -10   2 -6.1627  7.5420   1
  15  10   2 -0.4079 10.5478   1
 -15  10  -2 -4.3334 14.4905   3
  16 -10   2 4.91395 8.59945   1
 -16 -10  -2  3.0307 11.1074   2
  16  10   2 -7.1499 12.1740   1
 -16  10  -2 -12.960  11.987   3
 -14 -11   2  0.6825 10.3363   2
  14  11  -2 -5.7558 11.1227   1
 -14  11   2 10.4281 14.7687   3
 -13 -11   2 16.6910 12.0216   2
 -13  11   2  9.3907 10.6500   3
  13  11  -2 2.82279 9.07278   1
 -12 -11   2 -3.8994  8.5836   2
 -12  11   2 32.2455 15.8158   3
  12  11  -2  6.9458 11.2427   1
 -11 -11   2  8.1970 11.1365   2
  11  11  -2  3.8343 10.1296   1
 -11  11   2 18.4176 11.4895   3
 -10 -11   2 24.3237 11.9062   2
 -10 -11   2  0.5110 11.3911   1
  10  11  -2 15.0964 12.0753   1
 -10  11   2 16.2348 11.9963   3
  -9 -11   2 7.29338 9.81898   1
  -9 -11   2 8.72969 8.63165   2
   9  11  -2 18.2119 10.6763   1
  -9  11   2 14.2421 11.1990   3
  -8 -11   2 3.08114 9.63640   1
  -8 -11   2 15.4708 10.8933   2
   8  11  -2 26.0873 12.5370   1
  -8  11   2 37.9634 13.8728   3
  -7 -11   2 10.1004  9.1177   2
  -7 -11   2 18.4924 11.6026   1
   7  11  -2 1.04147 9.92023   1
  -7  11   2  9.5962 10.6196   3
  -6 -11   2 20.2957 12.2029   1
   6  11  -2 31.3725 13.7391   1
  -6  11   2 11.6405  8.9279   3
   5 -11  -2 -1.9395  9.0391   1
  -5 -11   2 6.23490 9.95329   1
  -5  11   2 7.99928 8.30400   3
   5  11  -2 0.10648 8.84508   1
   4 -11  -2 10.8345 11.2197   1
  -4 -11   2 12.7025  9.7809   1
  -4  11   2 17.5002 11.2445   3
   4  11  -2 12.6243  9.7800   1
  -3 -11   2 -6.1649  6.9088   1
   3 -11  -2 13.3873  9.6984   1
  -3  11   2 0.69757 8.96057   3
   2 -11  -2 22.8027 11.9206   1
  -2 -11   2 7.99859 9.41667   1
  -1 -11   2 3.06793 8.32902   1
   1 -11  -2 -5.8693  8.1454   1
   0 -11   2 0.44121 8.07043   1
   0 -11  -2 -0.9965  7.0175   1
  -1 -11  -2 0.03542 8.25769   1
   1 -11   2 9.66588 9.62252   1
   1  11   2 18.3175 10.4792   1
  -2 -11  -2 -1.9790  8.2063   1
   2 -11   2 0.95007 9.20041   1
   2  11   2 15.4402  9.8349   1
   3 -11   2 6.40553 9.42932   1
  -3 -11  -2 -3.6733  7.1229   1
   3  11   2 15.9047  9.7734   1
  -3  11  -2 -10.398   8.246   3
  -4 -11  -2 -2.1420  8.6722   1
   4 -11   2 21.0356 12.2695   1
  -4 -11  -2 5.88349 7.77254   2
  -4  11  -2 20.4951 11.8636   3
   4  11   2 -5.0867  6.7064   1
  -5 -11  -2 -2.2572  8.1833   2
  -5 -11  -2 -0.9666  9.6256   1
   5 -11   2 3.68365 8.96039   1
  -5  11  -2 -11.701   7.651   3
   5  11   2 -7.8864  8.3072   1
  -6 -11  -2 0.95495 9.33111   1
   6 -11   2 13.1228 10.2177   1
  -6 -11  -2 7.10411 9.53431   2
  -6  11  -2 12.7349 10.7051   3
   6  11   2 12.7700  9.9323   1
  -7 -11  -2 11.2775  9.2669   1
  -7 -11  -2 0.85000 8.51248   2
   7 -11   2 -10.040  10.113   1
   7  11   2 21.0996 10.7354   1
  -7  11  -2  0.8371 11.2909   3
  -8 -11  -2 35.0765 14.1969   2
   8 -11   2 14.7396 10.8739   1
   8  11   2 39.4751 12.8252   1
  -8  11  -2 4.59733 9.80353   3
   9 -11   2 4.73145 9.73924   1
  -9 -11  -2  8.8244 10.7798   2
  -9  11  -2 -14.282  10.769   3
   9  11   2  1.5593 10.4617   1
  10 -11   2  0.5449 10.7902   1
 -10 -11  -2 11.4875 12.5729   2
 -10  11  -2 19.8549 15.0009   3
  10  11   2 15.3182 10.8591   1
  11 -11   2 -0.7544  9.4105   1
 -11 -11  -2 -1.5568  9.2686   2
 -11  11  -2 -1.7402 13.5265   3
  11  11   2 5.82958 9.66898   1
 -12 -11  -2  0.4872 10.9429   2
  12 -11   2 -0.8593 10.7187   1
  12  11   2 5.37233 9.95945   1
 -12  11  -2 26.5810 15.9260   3
 -13 -11  -2 -2.2505 11.7654   2
  13 -11   2 4.37407 9.33720   1
  13  11   2 11.6223 12.0038   1
 -13  11  -2 -9.5722 10.9018   3
  10  12  -2 1.45640 9.47081   1
 -10  12   2 11.1431 12.1428   3
  -9 -12   2 15.8945 11.5825   1
  -9  12   2 -5.3393  8.3152   3
   9  12  -2  6.1676 11.2366   1
  -8 -12   2  5.4984 10.9260   1
  -8  12   2 10.0588 10.7916   3
   8  12  -2 2.25930 9.22886   1
  -7 -12   2  4.1605 12.0306   1
  -7  12   2 -1.1909 11.7901   3
   7  12  -2 -4.7436  8.6757   1
  -6 -12   2 -1.5747 10.8901   1
  -6  12   2 25.4201 13.7062   3
   6  12  -2 -0.9070 11.1846   1
  -5 -12   2 -2.8765  8.7952   1
   5  12  -2 -2.3451  9.6429   1
  -4 -12   2 2.45039 9.46741   1
   4  12  -2 25.6550 13.1774   1
  -3 -12   2 -5.7236 10.7901   1
   3  12  -2  9.3157 10.6603   1
  -2 -12   2  0.7087 10.8552   1
  -1 -12   2 -2.3121  8.8319   1
   0 -12   2 34.5208 14.9695   1
   0  12   2 26.8530 11.0928   1
   1 -12   2 3.82615 8.84145   1
   1  12   2 -5.8549  9.2747   1
   2 -12   2 16.8510 10.6431   1
  -2 -12  -2  6.0349 11.1844   1
   2  12   2 11.2881 12.1360   1
   3 -12   2 13.2585 10.7366   1
  -3 -12  -2 -1.6160 10.5399   1
   3  12   2 -2.1517 10.6536   1
   4 -12   2  8.9498 12.1798   1
  -4 -12  -2  9.3680 10.9929   1
   4  12   2 -3.6766 10.2321   1
   5 -12   2  7.9450 11.5242   1
  -5 -12  -2  8.2658 10.5050   1
   5  12   2 4.57548 9.01717   1
  -5  12  -2 -13.410   7.895   3
  -6 -12  -2  3.2597 10.0154   1
  -6 -12  -2 15.5235 10.8209   2
   6 -12   2 11.3545 11.8091   1
   6  12   2 0.37676 8.38831   1
  -6  12  -2  3.7097 10.6914   3
  -7 -12  -2 -8.9843 11.2497   2
   7 -12   2 11.1670 10.8286   1
  -7 -12  -2 10.1128 13.0008   1
   7  12   2 13.8997 11.6602   1
  -7  12  -2  9.5916 11.7927   3
   8 -12   2 11.7933 11.6715   1
  -8 -12  -2 13.0580 10.3274   2
   8  12   2 18.3081 11.6037   1
  -8  12  -2 -4.2301 13.2777   3
  -9 -12  -2 -2.7354  8.5031   2
   9 -12   2  6.0385 13.0498   1
   9  12   2 -4.2666  8.5975   1
  -9  12  -2 -3.2285 11.7070   3
  27   0  -3  9.1474 11.9916   1
  26   0  -3  6.2125 13.6021   1
  25   0  -3 33.3689 14.1895   1
  24   0  -3 -6.9112  8.3918   1
  23   0  -3 42.5604 13.8839   1
  22   0  -3 3.52742 8.18187   1
 -22   0   3 10.5185  9.7847   2
  21   0  -3 -7.4335  7.1740   1
 -21   0   3 4.88128 8.60875   2
  20   0  -3 -1.6616  7.3457   1
 -20   0   3 6.71897 7.77777   2
 -19   0   3 4.41315 7.12049   2
  19   0  -3 7.12516 7.96018   1
 -18   0   3 12.9969  8.1749   2
  18   0  -3 12.6882  8.8009   1
  17   0  -3 -1.3932  6.4830   1
 -17   0   3 -1.4751  6.7697   2
 -16   0   3 -3.9632  6.1896   2
 -16   0   3 2.88630 5.07290   3
  16   0  -3 3.01682 7.20271   1
 -15   0   3 190.589  12.962   3
 -15   0   3 180.129  17.346   2
  15   0  -3 210.907  20.439   1
  14   0  -3 1.03772 5.24929   1
 -14   0   3 6.52006 5.38455   2
 -14   0   3 -2.3005  3.5728   3
 -13   0   3 257.849  16.625   2
 -13   0   3 231.316  13.507   3
  13   0  -3 281.283  18.162   1
 -12   0   3 -3.5938  3.9521   2
  12   0  -3 9.15590 5.37609   1
 -11   0   3 1904.10   56.17   2
  11   0  -3 1915.48   57.36   1
 -10   0   3 -4.8017  3.9381   2
  10   0  -3 4.91383 4.17308   1
  -9   0   3 318.083  16.054   2
   9   0  -3 310.547  16.016   1
   8   0  -3 3.25887 3.32259   1
  -8   0   3 -4.9086  3.5025   2
  -7   0   3 1796.72   49.08   2
   7   0  -3 1777.43   48.62   1
   7   0  -3 1811.56   46.77   3
   6   0  -3 -0.5285  1.9353   3
   6   0  -3 0.89260 2.55499   1
  -6   0   3 0.81606 3.58882   2
  -5   0   3 1820.66   47.56   2
   5   0  -3 1881.36   46.43   1
   5   0  -3 1804.92   45.82   3
  -4   0   3 5.62250 3.07044   2
   4   0  -3 -0.6546  1.2579   3
  -3   0   3 196.847   8.212   2
   3   0  -3 222.423   7.753   3
   3   0  -3 220.990   7.362   1
   2   0  -3 -1.5584  0.8535   3
  -2   0   3 1.88340 1.48074   2
   1   0  -3 793.967  20.624   3
  -1   0   3 787.777  20.459   2
   0   0  -3 -2.3493  1.2653   3
   0   0   3 -0.7771  0.8524   2
  -1   0  -3 1712.88   41.07   2
   1   0   3 1718.85   41.13   1
  -1   0  -3 1697.38   41.72   3
  -2   0  -3 -7.2204  1.5635   3
   2   0   3 -3.6283  1.6628   1
  -2   0  -3 -3.0677  1.3309   2
  -3   0  -3 1.03205 2.10857   2
  -3   0  -3 11.5992  4.0426   3
   3   0   3 7.87090 3.32402   1
  -4   0  -3 0.16413 1.82383   2
  -4   0  -3 -0.1988  2.6829   3
   4   0   3 2.30001 3.27936   1
   5   0   3 221.805  11.876   1
  -5   0  -3 223.237   9.678   2
  -5   0  -3 243.643  10.320   3
  -6   0  -3 -0.9754  2.0075   2
  -6   0  -3 -2.8204  2.7919   3
   6   0   3 -0.0899  3.1084   1
   7   0   3 11.7085  5.1170   1
   8   0   3 2.84702 4.17807   1
  -8   0  -3 -5.4695  2.3392   2
  -8   0  -3 2.19730 4.04092   3
   9   0   3 835.493  32.092   1
  -9   0  -3 849.931  27.723   3
  -9   0  -3 816.401  27.487   2
  10   0   3 0.58396 4.22633   1
 -10   0  -3 -7.6920  3.3869   3
 -10   0  -3 -1.1340  3.1954   2
 -11   0  -3 1257.99   39.14   3
  11   0   3 1303.59   45.38   1
 -11   0  -3 1249.89   39.61   2
 -12   0  -3 -7.4648  4.2143   3
 -12   0  -3 -0.2840  3.6797   2
  12   0   3 3.05148 6.04531   1
 -13   0  -3 654.293  26.520   2
  13   0   3 633.387  31.303   1
 -13   0  -3 631.772  25.437   3
 -14   0  -3 5.54059 5.00008   2
 -14   0  -3 -0.1199  4.9034   3
  14   0   3 5.59190 6.09733   1
 -15   0  -3 150.433  14.500   3
  15   0   3 138.541  17.527   1
 -15   0  -3 154.031  15.196   2
  16   0   3 9.62328 8.50860   1
 -16   0  -3 -1.6235  6.2250   3
 -16   0  -3 -0.3960  5.6675   2
  17   0   3 138.625  19.594   1
 -17   0  -3 125.658  15.072   2
  18   0   3 -16.416   6.662   1
  19   0   3 41.8076 12.5086   1
  20   0   3 4.67177 8.70275   1
  21   0   3 1.60355 9.52069   1
  22   0   3 0.15753 9.02368   1
  23   0   3 -15.777   7.689   1
  24   0   3 -2.5654  9.2235   1
  25   0   3 6.64438 9.95928   1
  26   0   3 -3.5036  9.7777   1
  27  -1  -3 -1.4900 10.6370   1
  27   1  -3  2.2207 12.6717   1
  26  -1  -3 15.0326 11.6802   1
  26   1  -3  7.6475 13.0621   1
  25  -1  -3 13.5110 12.1022   1
  25   1  -3 23.5888 12.6091   1
 -24  -1   3 8.42832 9.40027   2
  24  -1  -3 -4.9796  9.7321   1
  24   1  -3 0.95246 9.72672   1
  23  -1  -3 25.3653 12.3205   1
 -23  -1   3 49.2081 13.5876   2
  23   1  -3 74.1358 16.7766   1
  22  -1  -3 -4.7072  7.6035   1
 -22  -1   3 0.07414 7.12524   2
  22   1  -3 6.94006 9.52479   1
  21  -1  -3 69.9497 15.5646   1
 -21  -1   3 84.3661 15.7218   2
  21   1  -3 96.8795 17.3730   1
 -20  -1   3 20.3834  9.8263   2
  20  -1  -3 -3.7445  8.7263   1
  20   1  -3 5.61949 9.30589   1
 -20   1   3 12.5354  8.3328   2
 -19  -1   3 194.188  21.698   2
  19  -1  -3 235.989  25.575   1
 -19   1   3 190.389  19.672   2
  19   1  -3 164.646  21.607   1
  18  -1  -3 19.3721  9.4721   1
 -18  -1   3 -0.3517  7.3153   2
 -18   1   3 1.37719 6.73520   2
 -18   1   3 -4.1280  5.7993   3
  18   1  -3 15.3301  9.4586   1
 -17  -1   3 153.894  17.763   2
  17  -1  -3 85.7059 15.1505   1
 -17   1   3 121.244  15.323   2
 -17   1   3 118.815  14.270   3
  17   1  -3 91.2447 16.0525   1
  16  -1  -3 6.50240 7.81630   1
 -16  -1   3 -0.6976  7.0048   2
 -16   1   3 1.78511 5.31572   3
 -16   1   3 3.08873 6.31437   2
  16   1  -3 2.64089 6.31186   1
  15  -1  -3 242.726  21.822   1
 -15  -1   3 244.256  21.346   2
 -15   1   3 200.946  14.725   3
 -15   1   3 215.419  15.683   2
  15   1  -3 225.336  20.894   1
 -14  -1   3 -2.4775  6.0249   2
  14  -1  -3 -1.3748  5.4609   1
 -14  -1   3 0.62501 3.60699   3
 -14   1   3 4.98660 5.89067   2
  14   1  -3 4.77397 5.58172   1
 -14   1   3 -6.1698  3.9638   3
 -13  -1   3 118.120   8.787   3
 -13  -1   3 123.133  13.920   2
  13  -1  -3 126.777  14.477   1
 -13   1   3 117.063  12.639   2
  13   1  -3 131.246  14.956   1
 -12  -1   3 -1.9555  4.7138   2
 -12  -1   3 9.60931 3.69105   3
  12  -1  -3 -0.3545  4.1879   1
 -12   1   3 18.6576  6.6032   2
  12   1  -3 -0.9769  4.4117   1
  11  -1  -3 174.888  15.551   1
 -11  -1   3 170.386  13.048   2
 -11  -1   3 159.856   9.099   3
 -11   1   3 174.566  12.583   2
  11   1  -3 181.069  15.922   1
  10  -1  -3 286.301  16.360   1
 -10  -1   3 335.659  17.539   2
  10   1  -3 311.280  16.894   1
 -10   1   3 331.081  16.312   2
  -9  -1   3 213.283  13.364   2
   9  -1  -3 207.651  12.889   1
  -9   1   3 231.558  12.593   2
   9   1  -3 191.325  12.050   1
  -8  -1   3 14.6451  5.4210   2
   8  -1  -3 34.9725  6.2367   1
  -8   1   3 26.6495  5.5916   2
   8   1  -3 23.5668  4.9652   1
   7  -1  -3 165.880   9.821   3
   7  -1  -3 188.609  10.419   1
  -7  -1   3 167.759  11.097   2
  -7   1   3 168.176   9.487   2
   7   1  -3 172.650   9.821   1
   7   1  -3 172.062   7.240   3
   6  -1  -3 61.6595  6.7366   3
   6  -1  -3 85.4789  7.6963   1
  -6  -1   3 91.0237  9.0528   2
   6   1  -3 78.2961  4.2438   3
  -6   1   3 71.6761  6.6322   2
   6   1  -3 79.5172  6.0260   1
   5  -1  -3 12.7119  3.3101   1
  -5  -1   3 18.7180  5.1669   2
   5  -1  -3 22.9759  3.8943   3
  -5   1   3 27.4581  4.0248   2
   5   1  -3 24.8551  3.7256   1
   4  -1  -3 1104.02   27.95   1
  -4  -1   3 1029.20   30.51   2
   4  -1  -3 1059.72   29.72   3
  -4  -1   3 1053.64   29.13   1
   4   1  -3 1025.14   28.49   1
  -4   1   3 1090.10   28.48   2
  -3  -1   3 4279.16  100.52   1
  -3  -1   3 4298.01  102.72   2
   3  -1  -3 4437.20  102.77   3
  -3   1   3 4235.80  100.84   2
   3   1  -3 4399.35  100.60   1
  -2  -1   3 565.642  16.993   1
  -2  -1   3 551.638  17.095   2
   2  -1  -3 572.310  17.149   3
  -2   1   3 582.110  16.430   2
   2   1  -3 584.836  15.471   3
  -1  -1   3 276.942   9.806   1
  -1  -1   3 260.052   9.160   2
   1  -1  -3 259.048   9.420   3
  -1   1   3 284.321   9.506   2
   1   1  -3 262.351   8.756   3
   0  -1  -3 95.6688  4.8017   3
   0  -1   3 80.1570  4.9291   1
   0  -1  -3 89.1542  5.0260   2
   0   1  -3 88.2773  4.8869   3
  -1  -1  -3 269.981   9.261   3
  -1  -1  -3 275.549  10.215   2
   1  -1   3 286.462  10.374   1
  -1   1  -3 266.281  10.098   3
   1   1   3 282.033   9.132   1
   2  -1   3 1664.22   43.33   1
  -2  -1  -3 1727.69   43.60   2
  -2  -1  -3 1712.67   41.99   3
  -2   1  -3 1694.95   43.77   3
   2   1   3 1727.56   42.60   1
  -3  -1  -3 1812.33   46.97   2
   3  -1   3 1850.32   47.22   1
  -3  -1  -3 1805.80   44.95   3
  -3   1  -3 1814.58   47.40   3
   3   1   3 1867.07   47.14   1
  -4  -1  -3 162.989   8.520   2
  -4  -1  -3 151.590   6.978   3
   4  -1   3 157.422   9.061   1
   4   1   3 131.853   8.808   1
  -4   1  -3 153.043   8.791   3
   5  -1   3 451.859  17.866   1
  -5  -1  -3 432.602  14.294   3
  -5  -1  -3 449.613  16.721   2
  -5   1  -3 461.410  13.512   2
   5   1   3 463.575  18.164   1
  -5   1  -3 446.963  17.081   3
  -6  -1  -3 169.988   9.966   2
  -6  -1  -3 173.839   8.216   3
   6  -1   3 167.862  10.809   1
   6   1   3 190.752  11.613   1
  -6   1  -3 175.642   7.614   2
  -6   1  -3 191.358  10.979   3
   7  -1   3 1445.07   43.61   1
  -7  -1  -3 1482.75   38.03   3
  -7  -1  -3 1429.62   41.49   2
  -7   1  -3 1417.91   41.82   3
   7   1   3 1360.19   43.53   1
  -7   1  -3 1468.44   37.86   2
   8  -1   3 78.5068 10.0498   1
  -8  -1  -3 67.8746  7.9125   2
  -8  -1  -3 89.4846  7.5526   3
   8   1   3 89.8768 10.8505   1
  -8   1  -3 85.7192  9.3403   3
  -8   1  -3 82.8920  7.1747   2
  -9  -1  -3 332.317  16.306   2
  -9  -1  -3 353.659  14.173   3
   9  -1   3 347.299  19.141   1
  -9   1  -3 361.327  17.362   3
  -9   1  -3 359.042  14.449   2
   9   1   3 347.759  19.162   1
 -10  -1  -3 181.223  10.182   3
 -10  -1  -3 181.364  12.169   2
  10  -1   3 176.917  16.663   1
 -10   1  -3 206.849  13.357   3
  10   1   3 204.233  17.834   1
 -10   1  -3 199.283  10.727   2
 -11  -1  -3 7.87754 5.25456   2
 -11  -1  -3 13.8050  5.1612   3
  11  -1   3 17.4042  7.2568   1
 -11   1  -3 18.1639  4.7763   2
 -11   1  -3 20.5630  6.7918   3
  11   1   3 23.6287  7.5632   1
  12  -1   3 -3.7067  4.8032   1
 -12  -1  -3 -0.5030  3.7056   2
 -12  -1  -3 -0.7866  4.0470   3
  12   1   3 0.45964 5.40487   1
 -12   1  -3 -1.2853  4.0917   3
 -12   1  -3 0.13963 4.01993   2
 -13  -1  -3 0.37723 4.64021   2
 -13  -1  -3 13.6074  5.5742   3
  13  -1   3 6.89539 6.32754   1
 -13   1  -3 4.01746 6.03671   3
  13   1   3 6.79531 6.54639   1
 -13   1  -3 9.73025 5.14686   2
  14  -1   3 0.46759 6.36970   1
 -14  -1  -3 7.90675 5.70973   3
 -14  -1  -3 4.10381 6.00720   2
 -14   1  -3 1.76767 5.94758   3
  14   1   3 13.7727  7.9333   1
 -14   1  -3 -4.4228  3.6649   2
  15  -1   3 202.653  21.703   1
 -15  -1  -3 202.491  18.867   2
  15   1   3 139.379  18.613   1
 -15   1  -3 172.796  15.622   2
 -15   1  -3 196.908  18.136   3
  16  -1   3 54.6424 13.4375   1
 -16  -1  -3 44.3396 10.4030   2
  16   1   3 43.0022 13.1166   1
 -16   1  -3 41.2096  9.6514   3
 -17  -1  -3 89.0326 13.7782   2
  17  -1   3 90.5403 15.9070   1
 -17   1  -3 123.528  15.351   3
  17   1   3 93.2209 15.8839   1
  18  -1   3 3.70079 7.64415   1
 -18  -1  -3 2.85821 6.99838   2
  18   1   3 4.63119 7.92795   1
 -19  -1  -3 47.6736 12.5283   2
  19  -1   3 61.3309 14.2022   1
  19   1   3 56.4363 15.3090   1
  20  -1   3 3.02407 8.08864   1
  20   1   3 -1.9266  8.3394   1
  21  -1   3 34.4050 12.5884   1
  21   1   3 73.1608 17.0645   1
  22  -1   3 2.95690 8.60727   1
  22   1   3  3.4360 11.0492   1
  23  -1   3 12.4311 10.3995   1
  23   1   3 17.5788 12.5347   1
  24  -1   3 12.0765 11.7529   1
  24   1   3  4.3480 10.0674   1
  25  -1   3 -3.9979  9.0697   1
  25   1   3 -5.6901 11.3308   1
  26  -1   3 -8.1994 12.6841   1
  26   1   3 12.0732 12.6993   1
  27  -2  -3 -3.4762  8.9890   1
  27   2  -3 22.1757 14.3645   1
  26  -2  -3  2.9698 12.7599   1
  26   2  -3 31.0590 13.8515   1
  25  -2  -3 -11.814   8.268   1
 -25  -2   3 16.5732 12.1106   2
  25   2  -3 21.2376 12.5169   1
  24  -2  -3  8.5984 10.3292   1
 -24  -2   3  6.2162 11.3426   2
  24   2  -3 10.8396 11.3938   1
  23  -2  -3 1.70893 9.82796   1
 -23  -2   3 12.9525 10.1815   2
  23   2  -3 10.1114 10.0952   1
  22  -2  -3 2.63998 8.20074   1
 -22  -2   3 4.69444 9.69258   2
  22   2  -3  5.4944 10.2138   1
  21  -2  -3 3.77369 7.68155   1
 -21  -2   3 15.6074 10.7075   2
  21   2  -3 -17.085   6.170   1
 -20  -2   3 2.40770 7.54510   2
  20  -2  -3 4.69621 6.99721   1
  20   2  -3 -2.5735  8.0095   1
  19  -2  -3 5.13316 8.01259   1
 -19  -2   3 -4.9617  8.1408   2
  19   2  -3 -7.2516  6.2505   1
 -19   2   3 -5.7181  6.2256   3
  18  -2  -3 8.41361 8.90247   1
 -18  -2   3 6.40862 7.71525   2
 -18   2   3 18.8878  9.5487   2
 -18   2   3 23.0950  9.3823   3
  18   2  -3 1.52391 7.09836   1
 -17  -2   3 13.9261  9.3780   2
  17  -2  -3 7.37191 6.80996   1
 -17   2   3 5.62216 7.10571   2
  17   2  -3 19.8429  9.5058   1
 -17   2   3 11.2947  7.6516   3
  16  -2  -3 105.384  15.061   1
 -16  -2   3 90.7994 14.2736   2
 -16   2   3 88.8118 12.9915   2
  16   2  -3 71.9324 13.3060   1
 -16   2   3 105.177  13.988   3
  15  -2  -3 143.161  16.951   1
 -15  -2   3 137.689  16.780   2
  15   2  -3 123.921  16.372   1
 -15   2   3 171.329  17.162   3
 -15   2   3 147.077  14.938   2
 -14  -2   3 50.9142 10.3315   2
  14  -2  -3 73.4337 11.8691   1
 -14   2   3 70.7763 10.6217   2
  14   2  -3 53.9117 10.7646   1
  13  -2  -3 382.138  21.391   1
 -13  -2   3 384.975  21.746   2
 -13   2   3 375.508  19.091   2
  13   2  -3 387.907  21.460   1
  12  -2  -3 134.625  14.298   1
 -12  -2   3 120.499  13.816   2
 -12   2   3 139.572  12.632   2
  12   2  -3 119.471  13.023   1
 -11  -2   3 955.479  35.789   2
 -11  -2   3 996.282  25.729   3
  11  -2  -3 929.764  34.172   1
  11   2  -3 925.476  33.868   1
 -11   2   3 941.239  31.339   2
  10  -2  -3 452.361  20.570   1
 -10  -2   3 422.867  21.395   2
 -10  -2   3 449.861  13.500   3
  10   2  -3 458.046  20.417   1
 -10   2   3 477.997  18.761   2
  -9  -2   3 861.775  31.321   2
   9  -2  -3 819.683  28.775   1
  -9   2   3 823.693  26.317   2
   9   2  -3 805.904  28.664   1
  -8  -2   3 1273.11   40.61   2
   8  -2  -3 1258.05   37.74   1
   8   2  -3 1302.41   38.15   1
  -8   2   3 1214.71   35.29   2
  -7  -2   3 1111.75   35.74   2
   7  -2  -3 1094.27   32.61   1
   7   2  -3 1086.67   32.99   1
  -7   2   3 1093.23   31.00   2
  -6  -2   3 413.659  17.605   2
   6  -2  -3 354.722  16.241   3
   6  -2  -3 397.088  14.925   1
  -6  -2   3 404.109  16.604   1
  -6   2   3 390.804  14.061   2
   6   2  -3 384.056  15.602   1
  -5  -2   3 1329.53   37.35   1
   5  -2  -3 1295.85   38.03   3
  -5  -2   3 1278.66   38.07   2
   5  -2  -3 1278.76   34.58   1
  -5   2   3 1297.18   34.29   2
   5   2  -3 1278.32   36.53   1
  -4  -2   3 6.16212 3.66561   2
  -4  -2   3 4.74803 2.86197   1
   4  -2  -3 0.47932 1.73115   1
   4  -2  -3 3.27121 2.67814   3
  -4   2   3 4.23462 2.16075   2
   4   2  -3 -0.5268  1.9232   1
  -3  -2   3 388.390  15.400   2
  -3  -2   3 445.193  15.983   1
  -3   2   3 398.136  13.502   2
   3   2  -3 398.101  11.999   3
  -2  -2   3 34.6833  5.0337   1
  -2  -2   3 26.0137  4.7007   2
   2  -2  -3 36.1748  4.9162   3
   2  -2  -3 30.9870  3.5846   1
  -2   2   3 33.0625  4.0305   2
   2   2  -3 38.5648  4.1278   3
   1  -2  -3 3004.77   73.02   3
  -1  -2   3 3038.67   71.71   2
   1  -2  -3 2986.15   69.69   1
   1  -2  -3 2978.13   72.26   2
  -1  -2   3 2935.37   72.94   1
   1   2  -3 2904.27   71.54   3
   0  -2   3 159.673   8.807   1
   0  -2  -3 182.513   7.424   1
   0  -2   3 169.873   7.284   2
   0  -2  -3 167.683   7.820   3
   0  -2  -3 160.470   8.232   2
   0   2  -3 173.028   8.352   3
  -1  -2  -3 798.077  22.387   1
  -1  -2  -3 790.395  22.407   3
  -1  -2  -3 787.331  24.111   2
   1  -2   3 741.247  23.977   1
  -1   2  -3 806.852  24.113   3
   1   2   3 816.021  21.924   1
  -2  -2  -3 133.502   6.432   3
   2  -2   3 121.200   7.943   1
  -2  -2  -3 131.352   7.894   2
   2   2   3 143.479   6.949   1
  -2   2  -3 132.232   8.213   3
   3  -2   3 55.6667  6.4601   1
  -3  -2  -3 55.7776  4.0868   3
  -3  -2  -3 60.1629  6.6394   2
  -3   2  -3 67.3944  7.1442   3
   3   2   3 62.4265  5.8872   1
   4  -2   3 86.6845  8.3011   1
  -4  -2  -3 78.6368  4.7811   3
  -4  -2  -3 81.6031  8.1941   2
   4   2   3 86.7618  6.4901   1
  -4   2  -3 84.4081  8.5529   3
  -5  -2  -3 209.351  11.833   2
  -5  -2  -3 244.969   9.052   3
   5  -2   3 231.235  12.485   1
  -5   2  -3 230.385  12.518   3
   5   2   3 255.349  12.296   1
  -6  -2  -3 95.3929  5.6013   3
  -6  -2  -3 103.216  10.129   2
   6  -2   3 89.9026  9.5675   1
   6   2   3 103.561  10.144   1
  -6   2  -3 116.729  10.960   3
  -7  -2  -3 620.312  23.950   2
  -7  -2  -3 626.385  18.548   3
   7  -2   3 615.994  24.349   1
   7   2   3 594.744  23.810   1
  -7   2  -3 601.747  23.994   3
  -7   2  -3 642.764  17.459   2
  -8  -2  -3 35.5669  4.7486   3
  -8  -2  -3 35.8670  6.8001   2
   8  -2   3 41.9812  7.9086   1
  -8   2  -3 41.7533  4.3947   2
  -8   2  -3 39.4966  7.7708   3
  -9  -2  -3 377.305  18.722   2
   9  -2   3 368.334  19.461   1
  -9  -2  -3 395.212  13.695   3
  -9   2  -3 375.036  13.578   2
   9   2   3 356.272  19.514   1
  -9   2  -3 380.173  18.873   3
 -10  -2  -3 171.830  13.131   2
 -10  -2  -3 172.066   8.879   3
  10  -2   3 203.384  14.682   1
  10   2   3 160.142  15.786   1
 -10   2  -3 146.471  13.966   3
 -10   2  -3 171.382   9.170   2
  11  -2   3 571.555  26.917   1
 -11  -2  -3 514.583  18.182   3
 -11  -2  -3 568.934  25.237   2
 -11   2  -3 536.536  24.710   3
  11   2   3 541.209  26.719   1
 -11   2  -3 575.358  19.698   2
  12  -2   3 116.096  14.972   1
 -12  -2  -3 122.841   8.681   3
 -12  -2  -3 135.941  14.068   2
  12   2   3 94.0729 13.6159   1
 -12   2  -3 118.691  10.125   2
 -12   2  -3 114.376  13.470   3
 -13  -2  -3 264.317  17.650   2
  13  -2   3 278.450  20.156   1
 -13   2  -3 283.595  18.843   3
  13   2   3 301.348  20.973   1
 -14  -2  -3 82.4788 12.3349   2
  14  -2   3 67.3371 12.7135   1
  14   2   3 128.062  17.090   1
 -14   2  -3 112.615  14.807   3
 -15  -2  -3 256.810  19.389   2
  15  -2   3 276.700  24.987   1
 -15   2  -3 229.692  20.711   3
  15   2   3 266.063  25.070   1
 -16  -2  -3 24.6967  9.7012   2
  16  -2   3 27.4424 10.5040   1
  16   2   3 29.3186 11.0265   1
 -16   2  -3 50.0876 11.0835   3
  17  -2   3 108.826  17.037   1
 -17  -2  -3 138.753  17.968   2
 -17   2  -3 123.205  16.973   3
  17   2   3 96.3716 17.2896   1
 -18  -2  -3 13.8803  8.9493   2
  18  -2   3 -0.6978  7.3682   1
  18   2   3 15.7699  9.1825   1
 -18   2  -3 -1.6494  8.0523   3
  19  -2   3 43.2252 13.2763   1
 -19  -2  -3 60.4616 13.3858   2
 -19   2  -3 82.3597 15.4283   3
  19   2   3 48.5940 14.8220   1
  20  -2   3 19.8120 10.4980   1
 -20  -2  -3 27.6695 11.2998   2
  20   2   3 0.94745 8.70352   1
 -21  -2  -3 2.36217 8.42422   2
  21  -2   3 0.38875 8.09772   1
  21   2   3 20.7277 11.0412   1
  22  -2   3 -1.2625  7.7929   1
  22   2   3 -2.1448  8.5053   1
  23  -2   3 -6.6567  8.3568   1
  23   2   3 -3.8101 11.6308   1
  24  -2   3  0.6463 11.9049   1
  24   2   3 -1.6444  9.6794   1
  25  -2   3 1.25863 9.75697   1
  25   2   3 -13.501  10.381   1
 -26  -3   3 16.7284 14.7636   2
  26  -3  -3  6.3683 10.2627   1
  26   3  -3 -3.3754 12.9385   1
 -25  -3   3  5.4977 12.1996   2
  25  -3  -3 11.6886  9.9198   1
  25   3  -3 16.9726 14.1084   1
  24  -3  -3 16.5968 11.6795   1
 -24  -3   3 33.8596 14.2287   2
  24   3  -3 23.0163 14.2572   1
 -23  -3   3 16.2543 10.7071   2
  23  -3  -3 25.8283 13.2003   1
  23   3  -3 13.7611 12.0244   1
 -22  -3   3 32.8216 12.3946   2
  22  -3  -3  7.2344 10.5231   1
  22   3  -3 9.19311 9.93868   1
 -21  -3   3 19.3018 11.4130   2
  21  -3  -3 10.6669  8.8037   1
 -21   3   3 38.9954 11.1852   3
  21   3  -3 29.6800 12.2217   1
  20  -3  -3 48.7376 12.8135   1
 -20  -3   3 61.3563 14.4961   2
  20   3  -3 15.0263  9.9557   1
 -20   3   3 36.7546 10.8038   3
 -19  -3   3 37.7347 12.4137   2
  19  -3  -3 47.1613 12.2805   1
  19   3  -3 37.9431 12.8841   1
 -19   3   3 23.9214  9.2394   3
 -18  -3   3 42.1026 11.9704   2
  18  -3  -3 43.1339 12.0056   1
  18   3  -3 34.6215 11.7749   1
 -18   3   3 45.6229 11.0049   3
 -17  -3   3 73.1358 14.1562   2
  17  -3  -3 54.2273 12.0410   1
  17   3  -3 67.7230 14.3587   1
 -17   3   3 87.6199 14.0784   3
 -16  -3   3 22.9046  9.5430   2
  16  -3  -3 22.7494  8.2370   1
 -16   3   3 22.8654  8.3130   3
  16   3  -3 9.26370 7.35510   1
 -15  -3   3 53.2865 12.3023   2
  15  -3  -3 63.3277 12.0344   1
 -15   3   3 42.6289 10.3715   3
 -15   3   3 41.1708  9.5822   2
  15   3  -3 47.8018 10.6728   1
 -14  -3   3 70.1053 11.9812   2
  14  -3  -3 69.1874 11.2207   1
 -14   3   3 51.4790  9.3180   2
  14   3  -3 64.8602 11.4701   1
 -13  -3   3 61.3662 11.5764   2
  13  -3  -3 57.8761 10.0497   1
 -13   3   3 65.0654  9.2659   2
  13   3  -3 66.1689 10.5146   1
  12  -3  -3 4.06257 4.69291   1
 -12  -3   3 31.1911  8.4804   2
  12   3  -3 21.3930  6.4877   1
 -12   3   3 23.9668  6.9013   2
  11  -3  -3 34.9107  7.1849   1
 -11   3   3 31.6102  6.8140   2
  11   3  -3 69.2814 10.2233   1
 -10  -3   3 67.8993 10.7348   2
  10  -3  -3 65.7169  9.0576   1
 -10   3   3 58.2887  7.5108   2
   9  -3  -3 118.429  11.307   1
  -9  -3   3 102.407  12.151   2
   9   3  -3 103.686  10.875   1
  -9   3   3 105.352   9.139   2
  -8  -3   3 21.1456  6.2387   2
   8  -3  -3 5.05468 3.78650   1
  -8   3   3 10.1551  3.7988   2
   8   3  -3 5.20528 4.27282   1
  -7  -3   3 14.0217  4.9851   1
   7  -3  -3 5.16355 3.51416   1
  -7  -3   3 9.62780 4.71572   2
  -7   3   3 6.21536 3.14117   2
   7   3  -3 6.17713 3.47947   1
  -6  -3   3 121.991  11.290   1
  -6  -3   3 132.911  11.885   2
   6  -3  -3 126.727   8.432   1
   6   3  -3 142.583   9.989   1
  -6   3   3 139.695   7.736   2
  -5  -3   3 199.570  12.056   2
  -5  -3   3 205.761  12.025   1
   5  -3  -3 212.991  12.632   3
   5  -3  -3 206.296  10.476   1
   5   3  -3 210.582   7.242   3
   5   3  -3 210.861  12.047   1
  -5   3   3 213.736   9.602   2
   4  -3  -3 371.994  17.372   3
   4  -3  -3 427.519  15.512   1
  -4  -3   3 422.687  17.730   1
  -4  -3   3 404.493  17.260   2
  -4   3   3 426.774  14.824   2
   4   3  -3 419.522  12.882   3
   3  -3  -3 898.065  26.505   1
  -3  -3   3 885.395  29.296   1
  -3  -3   3 928.499  28.824   2
   3  -3  -3 890.722  29.431   3
  -3   3   3 899.014  26.586   2
   3   3  -3 939.359  25.235   3
   2  -3  -3 1476.71   40.16   2
  -2  -3   3 1437.53   42.27   1
  -2  -3   3 1551.52   41.22   2
   2  -3  -3 1463.69   39.42   1
   2  -3  -3 1544.95   42.59   3
   2   3  -3 1452.72   39.14   3
   1  -3  -3 554.153  18.728   1
  -1  -3   3 563.847  21.183   1
  -1  -3   3 597.056  19.080   2
   1  -3  -3 542.686  19.408   2
   1  -3  -3 594.058  20.465   3
   1   3  -3 601.216  19.368   3
   0  -3  -3 1150.19   31.82   1
   0  -3  -3 1104.68   32.96   2
   0  -3  -3 1140.82   32.68   3
   0  -3   3 1121.88   34.37   1
   0  -3   3 1156.42   30.77   2
   0   3  -3 1109.08   32.84   3
  -1  -3  -3 536.789  18.352   1
  -1  -3  -3 543.502  18.292   3
   1  -3   3 531.688  20.349   1
  -1  -3  -3 546.193  19.851   2
   1  -3   3 566.614  16.370   2
   1   3   3 556.200  18.393   1
  -1   3  -3 521.338  19.505   3
  -2  -3  -3 1613.38   42.24   3
   2  -3   3 1582.23   45.38   1
  -2  -3  -3 1600.60   43.28   1
   2  -3   3 1629.63   39.13   2
  -2  -3  -3 1621.45   45.27   2
  -2   3  -3 1600.15   45.38   3
   2   3   3 1570.64   42.58   1
  -3  -3  -3 1175.19   31.49   3
  -3  -3  -3 1125.80   35.13   2
  -3  -3  -3 1183.93   34.11   1
   3  -3   3 1137.16   35.32   1
   3   3   3 1145.12   32.92   1
  -3   3  -3 1119.52   35.39   3
   4  -3   3 287.613  14.372   1
  -4  -3  -3 276.559  10.592   3
  -4  -3  -3 258.661  13.948   2
  -4   3  -3 276.642  14.312   3
   4   3   3 259.421  12.273   1
  -5  -3  -3 830.551  29.776   2
   5  -3   3 910.218  30.197   1
  -5  -3  -3 879.132  24.394   3
  -5   3  -3 855.763  30.201   3
   5   3   3 837.433  27.620   1
  -6  -3  -3 341.792  17.080   2
  -6  -3  -3 343.871  11.988   3
   6  -3   3 360.259  17.343   1
   6   3   3 324.447  15.598   1
  -6   3  -3 334.794  17.384   3
  -7  -3  -3 333.220  11.657   3
   7  -3   3 338.044  17.351   1
  -7  -3  -3 316.098  17.085   2
  -7   3  -3 308.239  17.509   3
   7   3   3 330.141  16.245   1
   8  -3   3 270.917  16.540   1
  -8  -3  -3 313.873  11.310   3
  -8  -3  -3 336.699  18.098   2
   8   3   3 306.606  16.844   1
  -8   3  -3 327.584  18.124   3
  -9  -3  -3 75.6458  5.1555   3
   9  -3   3 55.0049  9.3459   1
  -9  -3  -3 68.4476 10.4593   2
  -9   3  -3 80.0786  4.7069   2
  -9   3  -3 72.0609 10.6332   3
   9   3   3 56.1145  8.9450   1
  10  -3   3 1.34354 4.22383   1
 -10  -3  -3 -1.4618  3.6641   2
  10   3   3 3.74296 4.73876   1
 -10   3  -3 -3.3766  4.6178   3
  11  -3   3 -1.6928  4.2636   1
 -11  -3  -3 11.0254  5.6434   2
  11   3   3 2.92060 6.22728   1
 -11   3  -3 14.5646  6.8437   3
 -12  -3  -3 3.36469 5.02954   2
  12  -3   3 9.37147 6.46033   1
  12   3   3 14.7598  7.5749   1
 -12   3  -3 11.7341  6.6585   3
 -13  -3  -3 7.31456 5.74723   2
  13  -3   3 4.57288 5.44129   1
  13   3   3 4.56808 5.81083   1
 -13   3  -3 -2.9704  5.2295   3
  14  -3   3 13.2405  7.3851   1
 -14  -3  -3 19.8219  8.1041   2
  14   3   3 12.4220  8.1342   1
 -14   3  -3 23.4909  9.3804   3
 -15  -3  -3 1.82703 6.29058   2
  15  -3   3 12.9048  7.6726   1
  15   3   3 16.2980  8.8124   1
 -15   3  -3 8.51389 8.70954   3
  16  -3   3 94.0037 15.9658   1
 -16  -3  -3 112.635  17.168   2
  16   3   3 101.035  17.162   1
 -16   3  -3 100.245  15.650   3
 -17  -3  -3 70.2476 14.2038   2
  17  -3   3 41.1542 11.6749   1
 -17   3  -3 63.9754 14.0811   3
  17   3   3 92.7742 17.1309   1
 -18  -3  -3 33.0512 11.7741   2
  18  -3   3 24.8517 10.6103   1
  18   3   3 30.2758 12.2170   1
 -18   3  -3 32.8840 11.2583   3
 -19  -3  -3 77.3142 15.6323   2
  19  -3   3 71.8164 14.9917   1
  19   3   3 63.6920 16.9974   1
 -19   3  -3 49.3730 13.7525   3
  20  -3   3 16.3021  8.7605   1
 -20  -3  -3  6.6850 10.2391   2
 -20   3  -3 23.4968 12.2819   3
  20   3   3 35.6613 13.0661   1
 -21  -3  -3 26.1347 11.4455   2
  21  -3   3 16.8793 10.3480   1
 -21   3  -3 46.7305 14.7995   3
  21   3   3 46.3709 15.1174   1
  22  -3   3 0.24508 8.25152   1
 -22  -3  -3  2.8019 11.0281   2
  22   3   3  6.2271 11.0500   1
  23  -3   3  9.9835 10.6037   1
 -23  -3  -3 18.9603 12.8083   2
  23   3   3 15.6844 12.5919   1
  24  -3   3 -6.4956  9.3377   1
  24   3   3  3.9736 10.5710   1
  25  -3   3  9.0573 13.6290   1
  25   3   3 27.5138 16.2713   1
 -26  -4   3  8.5200 12.5338   2
  26  -4  -3  7.8267 11.4656   1
  26   4  -3  1.5351 12.6876   1
  25  -4  -3  7.9871 10.2813   1
 -25  -4   3 -0.8826 11.2906   2
  25   4  -3 11.6229 11.3648   1
 -24  -4   3 -1.3924 10.1594   2
  24  -4  -3 -1.4068  7.4146   1
  24   4  -3 -1.0415  8.6969   1
  23  -4  -3 23.1247 11.6668   1
 -23  -4   3  5.2342 10.3238   2
  23   4  -3 -5.9498  8.7862   1
 -23   4   3 -8.6785  9.9326   3
 -22  -4   3  0.1970 10.2238   2
  22  -4  -3 2.68109 7.61550   1
 -22   4   3 10.0221 10.5624   3
  22   4  -3  3.3476 10.3504   1
 -21  -4   3  7.8548 10.3933   2
  21  -4  -3 3.65623 7.82891   1
 -21   4   3 -9.3298  6.6541   3
  21   4  -3 1.11559 8.31228   1
 -20  -4   3 13.5324 10.0509   2
  20  -4  -3 0.36503 7.35276   1
  20   4  -3 1.18096 8.29183   1
 -20   4   3 1.80371 7.30051   3
 -19  -4   3 -0.1931  7.7926   2
  19  -4  -3 1.90608 6.69925   1
 -19   4   3 0.75919 7.65015   3
  19   4  -3 -0.2056  9.2239   1
  18  -4  -3 -3.4277  6.5966   1
 -18  -4   3 -1.9546  8.1574   2
  18   4  -3 -6.7295  6.2397   1
 -18   4   3 9.44230 8.38201   3
  17  -4  -3 15.2031  8.3866   1
 -17  -4   3 15.7748  8.7817   2
 -17   4   3 -5.1232  6.0553   3
  17   4  -3 10.2730  8.7924   1
  16  -4  -3 31.0217  9.6465   1
 -16  -4   3 24.1012 10.1967   2
 -16   4   3 43.0457 11.1504   3
  16   4  -3 22.0966  8.7980   1
 -15  -4   3 15.1535  8.1808   2
  15  -4  -3 -0.2338  5.3561   1
 -15   4   3 11.5762  8.0030   3
  15   4  -3 1.75700 6.03946   1
  14  -4  -3 93.0931 13.3338   1
 -14  -4   3 102.345  15.471   2
  14   4  -3 77.3560 12.1332   1
  13  -4  -3 158.926  16.356   1
 -13  -4   3 110.255  15.340   2
 -13   4   3 159.614  12.067   2
  13   4  -3 185.286  17.699   1
  12  -4  -3 328.896  19.057   1
 -12  -4   3 336.467  21.620   2
 -12   4   3 333.088  16.102   2
  12   4  -3 346.794  19.998   1
 -11  -4   3 210.473  20.009   2
  11  -4  -3 203.918  14.490   1
  11   4  -3 197.483  17.284   1
 -11   4   3 199.495  11.919   2
 -10  -4   3 617.056  28.912   2
  10  -4  -3 654.524  26.617   1
  10   4  -3 700.183  27.936   1
 -10   4   3 643.986  22.661   2
  -9  -4   3 344.653  19.837   2
   9  -4  -3 335.287  17.306   1
  -9   4   3 359.143  14.885   2
   9   4  -3 354.285  18.389   1
  -8  -4   3 149.676  14.838   2
  -8  -4   3 136.773  13.942   1
   8  -4  -3 138.837  10.324   1
   8   4  -3 149.504  13.527   1
  -8   4   3 157.949   9.119   2
  -7  -4   3 360.062  18.675   1
   7  -4  -3 356.081  16.649   1
  -7  -4   3 320.102  18.072   2
  -7   4   3 343.213  13.957   2
   7   4  -3 352.823  17.877   1
  -6  -4   3 404.781  19.607   2
   6  -4  -3 405.669  17.575   1
  -6  -4   3 405.853  19.620   1
  -6   4   3 405.975  15.348   2
   6   4  -3 415.700  12.420   3
   6   4  -3 386.040  18.977   1
  -5  -4   3 232.910  14.182   2
  -5  -4   3 249.787  14.648   1
   5  -4  -3 240.987  12.687   1
  -5   4   3 243.050  11.244   2
   5   4  -3 266.392  14.981   1
   5   4  -3 253.198   9.749   3
   4  -4  -3 279.318  13.001   1
  -4  -4   3 215.708  13.668   1
  -4  -4   3 195.848  12.619   2
   4   4  -3 227.945  10.058   3
  -4   4   3 245.323  11.279   2
  -3  -4   3 434.193  19.526   1
  -3  -4   3 402.210  17.586   2
   3  -4  -3 392.675  16.804   1
   3  -4  -3 397.359  18.605   3
   3   4  -3 427.111  15.533   3
  -2  -4   3 251.743  14.427   1
  -2  -4   3 244.913  12.637   2
   2  -4  -3 257.695  13.887   3
   2  -4  -3 243.409  12.276   1
   2  -4  -3 247.603  12.355   2
   2   4  -3 237.722  11.709   3
   1  -4  -3 263.338  13.166   1
  -1  -4   3 333.264  16.435   1
   1  -4  -3 275.317  13.287   2
  -1  -4   3 281.790  12.859   2
   1  -4  -3 279.929  14.127   3
   1   4  -3 270.673  13.318   3
   0  -4   3 3.18130 3.52132   1
   0  -4  -3 5.90127 3.16787   1
   0  -4  -3 5.39869 3.94062   2
   0  -4   3 15.3332  3.6876   2
   0  -4  -3 8.62716 3.79477   3
   0   4  -3 0.89000 2.63418   3
  -1  -4  -3 84.0540  8.3789   3
   1  -4   3 87.4200 10.0270   1
  -1  -4  -3 90.6223  8.8141   1
   1  -4   3 90.1545  6.1493   2
  -1  -4  -3 102.185   9.811   2
  -1   4  -3 115.906  10.308   3
   2  -4   3 17.5792  5.0083   1
  -2  -4  -3 16.0135  4.0233   3
  -2  -4  -3 11.2496  4.2759   2
  -2  -4  -3 13.7865  4.4654   1
   2  -4   3 11.5987  2.7721   2
   2   4   3 12.2089  3.9456   1
  -2   4  -3 1.86388 3.34745   3
  -3  -4  -3 87.7629  7.7842   3
  -3  -4  -3 80.5890  8.6735   1
   3  -4   3 74.3196  4.6174   2
   3  -4   3 62.3967  8.8447   1
  -3  -4  -3 62.1138  8.3563   2
   3   4   3 81.9856  8.4428   1
  -3   4  -3 79.8585 10.0560   3
  -4  -4  -3 -1.2979  2.8757   1
   4  -4   3 -8.0081  2.5849   1
  -4  -4  -3 -0.6615  2.1769   3
  -4  -4  -3 4.80728 3.86036   2
   4   4   3 -0.8927  2.4399   1
  -4   4  -3 -0.6221  1.3062   2
  -4   4  -3 -2.7653  3.6435   3
  -5  -4  -3 135.613   7.875   3
   5  -4   3 153.371  13.555   1
  -5  -4  -3 147.922  13.662   2
  -5   4  -3 126.761  13.136   3
   5   4   3 142.746  10.033   1
  -6  -4  -3 207.478   9.395   3
   6  -4   3 189.669  13.479   1
  -6  -4  -3 205.878  14.107   2
  -6   4  -3 202.278  14.300   3
   6   4   3 189.240  12.424   1
  -7  -4  -3 350.650  12.876   3
  -7  -4  -3 346.024  18.970   2
   7  -4   3 358.168  19.249   1
   7   4   3 328.710  17.019   1
  -7   4  -3 349.013  19.563   3
  -8  -4  -3 460.156  15.557   3
   8  -4   3 488.806  23.097   1
  -8  -4  -3 463.033  23.099   2
   8   4   3 469.219  21.795   1
  -8   4  -3 472.283  23.609   3
  -9  -4  -3 203.394  15.309   2
   9  -4   3 182.732  16.559   1
   9   4   3 200.754  14.181   1
  -9   4  -3 177.372  17.186   3
 -10  -4  -3 303.638  19.891   2
  10  -4   3 336.642  20.018   1
 -10   4  -3 309.819  20.214   3
  10   4   3 320.693  18.989   1
 -11  -4  -3 213.584  19.790   2
  11  -4   3 219.792  19.826   1
 -11   4  -3 229.018  21.024   3
  11   4   3 229.404  16.707   1
 -12  -4  -3 139.191  17.000   2
  12  -4   3 159.277  17.368   1
 -12   4  -3 151.397  18.302   3
  12   4   3 144.033  16.741   1
  13  -4   3 157.021  18.096   1
 -13  -4  -3 116.831  15.940   2
  13   4   3 188.416  19.149   1
 -13   4  -3 153.101  18.636   3
  14  -4   3 112.283  16.708   1
 -14  -4  -3 114.852  15.833   2
 -14   4  -3 81.1562 15.0147   3
  14   4   3 88.5090 14.9447   1
 -15  -4  -3 70.4377 13.9076   2
  15  -4   3 97.4886 15.7335   1
  15   4   3 87.0217 15.4689   1
 -15   4  -3 101.924  15.990   3
 -16  -4  -3 72.1458 13.7178   2
  16  -4   3 66.1404 14.1653   1
 -16   4  -3 55.4914 13.0192   3
  16   4   3 79.8301 15.2086   1
 -17  -4  -3 58.8070 13.4969   2
  17  -4   3 67.1968 14.1929   1
 -17   4  -3 57.2572 13.7941   3
  17   4   3 49.6646 13.3349   1
  18  -4   3 9.38201 9.37255   1
 -18  -4  -3 19.7818 11.0515   2
 -18   4  -3 -6.1426  7.6505   3
  18   4   3 25.1900 11.6770   1
  19  -4   3 5.43401 8.77498   1
 -19  -4  -3 -2.8098  8.5651   2
  19   4   3  9.6216 11.0274   1
 -19   4  -3 33.1924 12.4767   3
 -20  -4  -3 -3.4175  9.8321   2
  20  -4   3 -2.0687  8.3035   1
 -20   4  -3 -0.0233  8.8403   3
  20   4   3 -10.561   9.261   1
 -21  -4  -3  4.0602 10.6952   2
  21  -4   3 -1.8478  8.5484   1
  21   4   3 -3.1200  9.1354   1
 -21   4  -3 -3.6705  8.9619   3
  22  -4   3 -10.269   9.510   1
 -22  -4  -3 15.7018 11.0836   2
  22   4   3  6.1982 12.1233   1
 -22   4  -3 -10.183  10.723   3
 -23  -4  -3  8.1975 13.0075   2
  23  -4   3 2.55415 9.52175   1
  23   4   3 -8.0569 10.6833   1
 -24  -4  -3 -3.5523 10.5624   2
  24  -4   3 14.0292 13.5991   1
  24   4   3  0.9856 12.9164   1
 -25  -5   3 18.7384 11.1640   2
  25  -5  -3 -12.110   9.873   1
  25   5  -3 -11.274  10.481   1
 -24  -5   3 16.8486 12.7273   2
  24  -5  -3 4.53855 9.41095   1
  24   5  -3  2.6561 13.6105   1
 -24   5   3 12.9169 13.7241   3
  23  -5  -3 -3.9214  8.9173   1
 -23  -5   3 -1.3041 12.1420   2
  23   5  -3  8.9638 13.0407   1
 -23   5   3 -5.2693  8.3654   3
  22  -5  -3 27.4420 11.3900   1
 -22  -5   3 27.4473 15.4195   2
 -22   5   3 23.6623 13.1729   3
  22   5  -3 -0.1959 10.9282   1
 -21  -5   3 2.70029 8.87100   2
  21  -5  -3 8.76840 8.85093   1
  21   5  -3  4.4566 10.0124   1
 -21   5   3 9.73878 9.18134   3
 -20  -5   3 67.5421 16.4635   2
  20  -5  -3 55.4952 13.7382   1
 -20   5   3 43.0914 13.9587   3
  20   5  -3 33.0052 12.6190   1
 -19  -5   3 3.85915 8.74652   2
  19  -5  -3 14.0698  7.9289   1
 -19   5   3 23.6596 10.2621   3
  19   5  -3 34.1385 11.8561   1
  18  -5  -3 136.473  18.437   1
 -18  -5   3 92.9088 17.4648   2
 -18   5   3 83.0891 16.1559   3
  18   5  -3 105.845  17.194   1
 -17  -5   3 17.6591  9.0495   2
  17  -5  -3 39.1460 11.1409   1
 -17   5   3 44.1459 12.3767   3
  17   5  -3 50.0584 12.3366   1
 -16  -5   3 118.462  17.934   2
  16  -5  -3 104.999  15.925   1
  16   5  -3 108.123  16.127   1
 -16   5   3 110.875  17.014   3
  15  -5  -3 32.1614  9.6146   1
 -15  -5   3 41.0694 11.3350   2
  15   5  -3 44.0583 10.6268   1
 -15   5   3 15.5382  8.7656   3
  14  -5  -3 89.6738 12.9592   1
 -14  -5   3 56.3237 12.5053   2
  14   5  -3 59.7161 11.8516   1
 -14   5   3 64.4945 13.1335   3
  13  -5  -3 3.94930 5.54523   1
 -13  -5   3 -0.6699  5.3447   2
  13   5  -3 -4.6355  4.7164   1
  12  -5  -3 38.7529  8.5352   1
 -12  -5   3 61.6029 11.8239   2
  12   5  -3 33.0475  8.5090   1
 -11  -5   3 1.69989 5.61802   2
  11  -5  -3 0.76340 4.52325   1
  11   5  -3 -0.3319  3.8805   1
 -11   5   3 10.1064  5.2671   2
 -10  -5   3 9.17166 6.00180   2
  10  -5  -3 4.02787 4.45510   1
 -10   5   3 -1.0576  3.6599   2
  10   5  -3 -0.8697  3.4796   1
   9  -5  -3 8.60214 5.11452   1
  -9  -5   3 -5.1768  4.4323   2
  -9  -5   3 -3.1913  3.8007   1
  -9   5   3 -3.3804  3.1013   2
   9   5  -3 0.87013 3.91383   1
   8  -5  -3 32.9372  7.4434   1
  -8  -5   3 51.7685  9.8368   1
  -8  -5   3 35.9835  8.3817   2
   8   5  -3 43.5397  8.2641   1
  -8   5   3 34.1948  5.4905   2
  -7  -5   3 0.80223 4.45329   1
  -7  -5   3 14.5400  5.5747   2
   7  -5  -3 6.49345 4.60046   1
   7   5  -3 0.92915 4.06693   1
  -7   5   3 10.5802  3.8219   2
   7   5  -3 4.12864 2.63229   3
  -6  -5   3 157.578  15.129   1
  -6  -5   3 150.870  14.608   2
   6  -5  -3 155.181  13.825   1
  -6   5   3 139.804   8.949   2
   6   5  -3 140.329   7.694   3
   6   5  -3 142.492  14.087   1
   5  -5  -3 45.0175  7.8900   1
  -5  -5   3 20.9643  6.3166   1
  -5  -5   3 35.6396  7.8616   2
   5   5  -3 38.9457  5.5339   3
  -5   5   3 31.6867  5.5974   2
  -4  -5   3 328.426  18.554   1
  -4  -5   3 371.408  17.869   2
   4  -5  -3 304.491  16.401   1
  -4   5   3 327.683  14.878   2
   4   5  -3 344.772  14.301   3
   3  -5  -3 76.9232  8.3643   2
  -3  -5   3 90.8393 10.0835   2
   3  -5  -3 99.4919 10.5343   1
  -3  -5   3 92.1062 11.4518   1
   3   5  -3 98.4417  9.0331   3
   2  -5  -3 697.106  25.270   2
  -2  -5   3 697.403  25.704   2
  -2  -5   3 727.007  28.960   1
   2  -5  -3 722.610  26.502   1
   2   5  -3 708.447  24.928   3
   1  -5  -3 382.405  17.635   1
   1  -5  -3 355.618  17.033   2
  -1  -5   3 362.498  16.423   2
  -1  -5   3 349.892  19.209   1
   1   5  -3 413.055  17.763   3
   0  -5   3 573.967  21.212   2
   0  -5  -3 568.795  22.992   1
   0  -5  -3 615.707  23.719   2
   0  -5  -3 637.629  24.313   3
   0  -5   3 602.393  25.858   1
   0   5  -3 572.925  23.198   3
   1  -5   3 185.865  15.908   1
  -1  -5  -3 151.949  10.440   3
   1  -5   3 138.013   8.709   2
  -1  -5  -3 145.214  10.675   1
  -1  -5  -3 117.517  11.676   2
  -1   5  -3 155.669  11.659   3
  -2  -5  -3 394.848  18.766   1
  -2  -5  -3 418.007  19.774   2
   2  -5   3 423.928  21.210   1
   2  -5   3 426.769  15.468   2
  -2  -5  -3 406.759  17.889   3
   2   5   3 407.409  18.817   1
  -2   5  -3 435.156  20.338   3
  -3  -5  -3 292.686  16.613   2
   3  -5   3 314.282  11.966   2
   3  -5   3 284.178  17.286   1
  -3  -5  -3 324.896  14.811   3
  -3  -5  -3 294.372  16.319   1
   3   5   3 298.817  15.949   1
  -3   5  -3 305.166  17.299   3
   4  -5   3 618.779  18.463   2
  -4  -5  -3 626.090  26.321   2
  -4  -5  -3 615.010  22.085   3
   4  -5   3 568.277  26.119   1
  -4  -5  -3 623.118  25.755   1
   4   5   3 637.029  24.666   1
  -4   5  -3 626.825  26.920   3
   5  -5   3 175.752  16.371   1
  -5  -5  -3 131.532   8.875   3
  -5  -5  -3 179.126  13.481   2
  -5  -5  -3 139.668  13.976   1
   5   5   3 162.516  11.746   1
  -5   5  -3 187.522  16.774   3
  -5   5  -3 162.143   6.714   2
  -6  -5  -3 416.098  16.068   3
  -6  -5  -3 416.415  21.940   2
   6  -5   3 406.701  21.678   1
   6   5   3 421.055  19.837   1
  -6   5  -3 426.570  22.572   3
  -7  -5  -3 65.7571 11.3805   2
   7  -5   3 72.1115 11.1892   1
  -7   5  -3 65.5384 11.1269   3
   7   5   3 74.2399 10.2386   1
   8  -5   3 252.659  17.700   1
  -8  -5  -3 238.654  17.399   2
  -8   5  -3 281.218  18.987   3
   8   5   3 271.216  16.421   1
  -9  -5  -3 38.9650  8.9975   2
   9  -5   3 28.1994  8.2594   1
  -9   5  -3 22.1123  8.0635   3
   9   5   3 32.5237  8.1109   1
  10  -5   3 27.9179  8.4990   1
 -10  -5  -3 34.9010  9.2418   2
  10   5   3 47.9177  9.5479   1
 -10   5  -3 17.7331  7.5484   3
 -11  -5  -3 10.5723  6.7722   2
  11  -5   3 18.4120  8.2577   1
 -11   5  -3 14.6264  8.0376   3
  11   5   3 21.9941  7.6265   1
 -12  -5  -3 19.6157  8.4248   2
  12  -5   3 17.3085  6.9978   1
 -12   5  -3 23.4091  9.5096   3
  12   5   3 9.08231 6.48695   1
 -13  -5  -3 -3.0131  5.4745   2
  13  -5   3 2.82405 6.25294   1
 -13   5  -3 -2.4569  6.5190   3
  13   5   3 -4.0056  5.0479   1
 -14  -5  -3 26.7911 10.4681   2
  14  -5   3 32.8370 10.1656   1
 -14   5  -3 19.1994 10.1441   3
  14   5   3 14.8352  8.4913   1
  15  -5   3 1.33672 6.93412   1
 -15  -5  -3 2.42954 6.96982   2
 -15   5  -3 -7.6093  8.1916   3
  15   5   3 -3.1393  6.3607   1
 -16  -5  -3 53.2184 12.9342   2
  16  -5   3 34.5911 10.8276   1
  16   5   3 28.2567 11.1124   1
 -16   5  -3 11.7799 11.3942   3
  17  -5   3 16.9082  9.0032   1
 -17  -5  -3 4.83872 9.23449   2
  17   5   3 -3.9882  7.3094   1
 -17   5  -3 -4.4167  6.9271   3
 -18  -5  -3 25.1586 10.8957   2
  18  -5   3 18.2970 10.3766   1
  18   5   3 12.7320 11.0801   1
 -18   5  -3 28.5569 11.6445   3
  19  -5   3 10.2616  8.2289   1
 -19  -5  -3 -3.2752  9.2021   2
 -19   5  -3 15.7123 10.7757   3
  19   5   3  0.3339 11.6015   1
  20  -5   3 20.9752 11.7825   1
 -20  -5  -3 24.7346 14.5253   2
 -20   5  -3 29.7752 14.7516   3
  20   5   3 24.9391 12.6495   1
  21  -5   3 12.7265  9.1563   1
 -21  -5  -3 10.5504 11.9126   2
  21   5   3 2.60155 9.00237   1
 -21   5  -3 -7.6923  9.6848   3
 -22  -5  -3 27.9090 15.1373   2
  22  -5   3 7.48514 9.54464   1
  22   5   3 14.9697 13.1391   1
 -22   5  -3  5.7183 13.5836   3
 -23  -5  -3  4.3801 11.1005   2
  23  -5   3  1.6967 11.9784   1
  23   5   3 -8.0017 11.4599   1
 -23   5  -3 -2.4976 13.9932   3
 -24  -5  -3 13.2857 14.2564   2
  24  -5   3  2.7487 10.1236   1
  24   5   3  7.8747 15.1466   1
 -24  -6   3  5.6077 13.8248   2
  24  -6  -3 6.68312 9.23516   1
  24   6  -3 -13.429  10.216   1
 -24   6   3 -4.1156 11.2211   3
 -23  -6   3  0.3952 10.4164   2
  23  -6  -3 14.4977  9.3818   1
  23   6  -3  3.6639 11.5836   1
 -23   6   3 22.9949 14.1557   3
  22  -6  -3 8.62634 9.57467   1
 -22  -6   3 -18.227   9.575   2
 -22   6   3 12.8962 12.3463   3
  22   6  -3  1.4157 11.0352   1
  21  -6  -3 7.16643 8.84379   1
 -21  -6   3 4.01106 9.86978   2
  21   6  -3 -0.8931  9.3984   1
 -21   6   3  9.8072 10.4796   3
  20  -6  -3 9.61374 8.22912   1
 -20  -6   3 -3.5792  8.5614   2
 -20   6   3 8.25761 9.19939   3
  20   6  -3 -7.8933  9.1485   1
  19  -6  -3 7.23198 6.78692   1
 -19  -6   3 -2.6895  7.8628   2
  19   6  -3 9.96228 9.17357   1
 -19   6   3 1.52718 7.56679   3
  18  -6  -3 3.94306 7.23291   1
 -18  -6   3 6.98611 9.11093   2
 -18   6   3 0.29646 9.62727   3
  18   6  -3 10.0179  9.1911   1
  17  -6  -3 8.86199 6.60106   1
 -17  -6   3 -5.0914  5.7936   2
  17   6  -3 3.32871 7.45504   1
 -17   6   3 -0.0982  8.1322   3
  16  -6  -3 28.8066  9.3147   1
 -16  -6   3 15.9952  9.4376   2
 -16   6   3 34.0882 11.6243   3
  16   6  -3 33.0079 10.6730   1
  15  -6  -3 9.73941 7.28641   1
 -15  -6   3 -2.3047  8.6478   2
  15   6  -3 4.38502 7.10750   1
 -15   6   3 15.4810  9.3027   3
 -14  -6   3 150.322  19.951   2
  14  -6  -3 150.647  17.466   1
 -14   6   3 116.969  18.420   3
  14   6  -3 122.426  16.757   1
  13  -6  -3 6.69754 6.55920   1
 -13  -6   3 -4.5718  5.4394   2
  13   6  -3 7.10913 6.67173   1
  12  -6  -3 131.130  16.084   1
 -12  -6   3 114.108  16.653   2
  12   6  -3 130.021  16.301   1
  11  -6  -3 23.2218  7.6058   1
 -11  -6   3 27.5817  9.1964   2
  11   6  -3 44.4947  9.9011   1
 -10  -6   3 274.014  20.322   1
 -10  -6   3 273.497  19.971   2
  10  -6  -3 255.111  17.830   1
  10   6  -3 298.855  19.382   1
   9  -6  -3 11.5837  6.1955   1
  -9  -6   3 24.1696  7.7278   2
  -9  -6   3 15.6646  7.4978   1
  -9   6   3 9.61776 4.05395   2
   9   6  -3 2.40587 5.00051   1
  -8  -6   3 322.109  20.662   1
   8  -6  -3 333.604  19.245   1
  -8  -6   3 316.767  20.271   2
  -8   6   3 312.168  14.818   2
   8   6  -3 338.651  20.382   1
  -7  -6   3 28.8606  7.9298   1
  -7  -6   3 29.4886  7.9317   2
   7  -6  -3 32.4577  7.5644   1
   7   6  -3 43.9327  9.3753   1
  -7   6   3 40.9113  6.3349   2
   6  -6  -3 385.418  20.426   1
  -6  -6   3 382.821  21.796   1
  -6  -6   3 375.359  20.890   2
   6   6  -3 368.501  21.299   1
  -6   6   3 371.136  16.344   2
  -5  -6   3 -3.5643  4.2057   2
   5  -6  -3 -0.1757  4.5535   1
  -5  -6   3 -3.9639  4.0789   1
   5   6  -3 -1.4181  3.2330   3
  -5   6   3 5.48306 3.60234   2
  -4  -6   3 400.407  20.171   2
  -4  -6   3 350.920  21.216   1
   4  -6  -3 389.586  19.849   1
  -4   6   3 425.427  18.097   2
   4   6  -3 391.724  17.258   3
  -3  -6   3 -0.6347  3.8729   2
   3  -6  -3 6.72682 4.29955   2
  -3  -6   3 -7.5627  4.2800   1
   3  -6  -3 5.24742 4.75391   1
   3   6  -3 1.99722 3.82878   3
   2  -6  -3 133.354  12.253   2
  -2  -6   3 128.103  12.378   2
   2  -6  -3 122.642  13.218   1
  -2  -6   3 131.986  14.746   1
   2   6  -3 115.581  11.538   3
   1  -6  -3 193.931  13.099   2
  -1  -6   3 205.341  12.888   2
  -1  -6   3 187.213  17.821   1
   1  -6  -3 166.973  12.770   1
   1   6  -3 175.317  12.581   3
   0  -6   3 117.471  14.248   1
   0  -6  -3 124.143  12.878   2
   0  -6   3 106.366  10.547   2
   0  -6  -3 120.880  12.627   1
   0   6  -3 104.903  11.840   3
   1  -6   3 54.9139 10.2499   1
  -1  -6  -3 50.6764  9.1203   1
   1  -6   3 59.3406  7.5896   2
  -1  -6  -3 42.3460  8.6780   2
  -1   6  -3 54.2631  9.4466   3
   2  -6   3 -1.4141  2.6542   2
   2  -6   3 -4.2351  3.4827   1
  -2  -6  -3 -0.1550  3.5754   2
  -2  -6  -3 -5.5150  3.9480   1
   2   6   3 3.83687 4.40888   1
  -2   6  -3 6.29990 4.83319   3
  -3  -6  -3 3.07892 4.26910   1
  -3  -6  -3 6.46270 5.46426   2
   3  -6   3 3.42053 5.85678   1
   3  -6   3 6.93417 3.33342   2
  -3   6  -3 5.22370 5.19816   3
   3   6   3 5.92512 4.47454   1
   4  -6   3 60.9464 10.6261   1
  -4  -6  -3 88.1008 11.7010   2
  -4  -6  -3 86.9584 11.7655   1
   4   6   3 80.4415 10.7105   1
  -4   6  -3 76.1980 11.6510   3
   5  -6   3 1.81174 4.56037   1
  -5  -6  -3 15.1497  6.1711   2
  -5  -6  -3 7.75337 5.19375   1
  -5   6  -3 6.36354 5.51965   3
   5   6   3 6.17680 4.04914   1
  -6  -6  -3 218.267  15.976   1
  -6  -6  -3 193.318  18.550   2
   6  -6   3 237.804  17.440   1
   6   6   3 234.035  15.201   1
  -6   6  -3 182.432  18.254   3
  -7  -6  -3 18.7438  6.9822   2
   7  -6   3 17.0543  7.5627   1
   7   6   3 16.4962  6.4396   1
  -7   6  -3 31.5806  9.1703   3
  -8  -6  -3 277.820  19.566   2
   8  -6   3 255.344  18.878   1
   8   6   3 292.313  18.122   1
  -8   6  -3 291.570  20.737   3
  -9  -6  -3 13.6878  7.5743   2
   9  -6   3 10.3937  6.8427   1
   9   6   3 5.40309 5.70946   1
  -9   6  -3 11.5246  7.5513   3
  10  -6   3 396.843  24.252   1
 -10  -6  -3 383.809  24.646   2
 -10   6  -3 424.044  26.626   3
  10   6   3 382.665  22.594   1
 -11  -6  -3 -0.6166  7.0334   2
  11  -6   3 8.80283 6.48543   1
  11   6   3 6.10630 6.12156   1
 -11   6  -3 7.00574 7.98886   3
 -12  -6  -3 289.695  26.305   2
  12  -6   3 254.679  24.259   1
  12   6   3 248.221  22.433   1
 -12   6  -3 252.927  24.998   3
  13  -6   3 5.15661 6.95851   1
 -13  -6  -3 2.22219 6.87860   2
  13   6   3 6.14503 8.46704   1
 -13   6  -3 -0.3077  8.6239   3
  14  -6   3 118.049  17.814   1
 -14  -6  -3 89.5167 16.1675   2
  14   6   3 96.4170 16.5159   1
 -14   6  -3 102.716  17.529   3
  15  -6   3 -6.2947  5.4448   1
 -15  -6  -3 -4.0774  6.2486   2
 -15   6  -3 10.2126  9.5503   3
  15   6   3 3.21758 7.11741   1
 -16  -6  -3 52.4734 14.2878   2
  16  -6   3 84.9080 16.0744   1
  16   6   3 53.5326 13.8381   1
 -16   6  -3 49.8651 14.4021   3
  17  -6   3 1.39052 6.75563   1
 -17  -6  -3 6.92165 9.83408   2
 -17   6  -3 -7.3139  8.2051   3
  17   6   3 -16.310   9.161   1
  18  -6   3 3.56395 9.86995   1
 -18  -6  -3 42.1991 14.0342   2
 -18   6  -3 4.12165 9.68043   3
  18   6   3 16.1096 11.2265   1
 -19  -6  -3  9.2411 10.7394   2
  19  -6   3 6.07091 9.44843   1
  19   6   3 -6.9470  8.1263   1
 -19   6  -3  9.6088 10.9883   3
  20  -6   3 26.3235 11.3268   1
 -20  -6  -3 20.0064 11.5675   2
 -20   6  -3  0.0027 13.0920   3
  20   6   3  0.9485 12.6920   1
  21  -6   3 -0.4646  7.9447   1
 -21  -6  -3 -1.3621 11.9122   2
  21   6   3 -7.4989  9.3821   1
 -21   6  -3 -13.814   9.396   3
  22  -6   3 12.1419 10.0969   1
 -22  -6  -3 -6.2072 13.0130   2
  22   6   3  9.1954 13.1179   1
 -22   6  -3 -18.492  10.545   3
 -23  -6  -3 13.3252 13.7191   2
  23  -6   3 5.36691 9.58325   1
 -23   6  -3  6.7256 15.3964   3
  23   6   3 -12.298  13.839   1
 -23  -7   3 18.0285 13.7574   2
  23   7  -3 -7.7451 12.3552   1
 -23   7   3  9.3727 11.5314   3
 -22  -7   3 18.0405 13.7382   2
  22   7  -3 25.0565 14.7618   1
 -22   7   3  8.4409 11.3002   3
  21  -7  -3 -2.3024  9.4658   1
 -21  -7   3  9.3911 13.8014   2
  21   7  -3 15.4636 12.7001   1
 -21   7   3 10.4678 11.1840   3
 -20  -7   3 32.5812 15.7397   2
  20  -7  -3 25.8574 12.3578   1
  20   7  -3 33.0651 12.7823   1
 -20   7   3 26.1891 12.2107   3
  19  -7  -3 -0.2642  7.8426   1
 -19  -7   3  0.6979 11.4879   2
 -19   7   3 -2.1807  7.5539   3
  19   7  -3 7.49499 9.19165   1
 -18  -7   3 52.3641 15.0268   2
  18  -7  -3 18.7454 10.7126   1
  18   7  -3 37.1994 13.0459   1
 -18   7   3 70.7519 15.9503   3
 -17  -7   3 10.7738  9.1493   2
  17  -7  -3 3.90067 7.81841   1
  17   7  -3 3.64275 8.61717   1
 -17   7   3 16.8973 10.2753   3
 -16  -7   3 50.0005 13.5544   2
  16  -7  -3 28.6729  9.8183   1
 -16   7   3 71.3771 16.7774   3
  16   7  -3 60.1751 14.0506   1
  15  -7  -3 2.80626 5.73035   1
 -15  -7   3 6.39096 8.26410   2
 -15   7   3 9.61206 9.22234   3
  15   7  -3 -4.1735  7.2762   1
 -14  -7   3 29.5135 10.8582   2
  14  -7  -3 37.1881 10.3391   1
 -14   7   3 43.8027 12.6597   3
  14   7  -3 45.6364 11.5298   1
  13  -7  -3 3.94557 5.84852   1
 -13  -7   3 -3.5350  6.3199   2
  13   7  -3 -7.1571  7.4157   1
 -13   7   3 11.0273  8.9036   3
 -12  -7   3 19.3531  9.4807   2
  12  -7  -3 35.5302  9.9293   1
 -12   7   3 33.0557 11.7875   3
  12   7  -3 20.0926  9.4105   1
 -11  -7   3 13.9973  8.3673   2
  11  -7  -3 18.8625  8.6701   1
  11   7  -3 29.6985  8.5482   1
 -10  -7   3 -5.4125  6.0103   1
  10  -7  -3 -6.6032  3.2425   1
 -10  -7   3 0.80758 5.69648   2
  10   7  -3 -3.6634  5.8103   1
  -9  -7   3 24.5790  8.8412   1
  -9  -7   3 30.6197 10.2903   2
   9  -7  -3 35.4328  9.5849   1
   9   7  -3 26.2949  8.6560   1
  -8  -7   3 104.100  14.535   2
  -8  -7   3 87.5160 14.0814   1
   8  -7  -3 68.4947 11.7659   1
   8   7  -3 85.5294 13.5286   1
  -7  -7   3 37.8387  9.4520   1
  -7  -7   3 59.0141 11.1316   2
   7  -7  -3 42.9877  9.5297   1
   7   7  -3 34.8967  9.7760   1
  -7   7   3 57.2407  7.6576   2
  -6  -7   3 149.850  16.261   2
  -6  -7   3 169.665  17.701   1
   6  -7  -3 122.124  14.962   1
   6   7  -3 165.713  18.070   1
  -6   7   3 122.045  11.438   2
  -5  -7   3 10.3489  5.8739   2
  -5  -7   3 13.1953  7.1027   1
   5  -7  -3 13.2196  6.1602   1
  -5   7   3 11.9204  5.0253   2
   4  -7  -3 125.976  14.539   1
  -4  -7   3 144.353  15.182   2
  -4  -7   3 141.204  16.419   1
  -4   7   3 146.923  13.165   2
   4   7  -3 125.161  12.437   3
  -3  -7   3 -2.8010  4.9153   1
  -3  -7   3 -3.0310  4.2505   2
   3  -7  -3 -2.9295  3.2676   1
   3  -7  -3 -0.3774  4.0402   2
   3   7  -3 2.77137 4.81625   3
   2  -7  -3 333.202  19.924   1
  -2  -7   3 350.477  22.401   1
   2  -7  -3 345.879  18.661   2
  -2  -7   3 344.709  18.959   2
   2   7  -3 385.408  19.291   3
   1  -7  -3 3.16132 5.84666   1
  -1  -7   3 9.53463 7.03106   1
   1  -7  -3 8.11622 5.60499   2
  -1  -7   3 3.26652 4.39981   2
   1   7  -3 17.0303  6.0279   3
   0  -7   3 349.415  17.822   2
   0  -7  -3 367.765  19.898   2
   0  -7   3 375.937  22.798   1
   0  -7  -3 346.364  19.887   1
   0   7  -3 348.864  19.772   3
  -1  -7  -3 -0.3495  4.4362   1
   1  -7   3 1.61273 4.30670   2
  -1  -7  -3 0.04114 4.76190   2
   1  -7   3 10.6009  6.8651   1
  -1   7  -3 0.56871 5.39424   3
  -2  -7  -3 261.191  17.192   1
  -2  -7  -3 247.402  17.393   2
   2  -7   3 288.640  19.950   1
   2   7   3 260.385  16.888   1
  -2   7  -3 250.081  17.743   3
   3  -7   3 -0.6050  4.9515   1
  -3  -7  -3 -3.4122  4.3276   1
  -3  -7  -3 6.41715 6.07239   2
  -3   7  -3 2.83317 5.26174   3
   3   7   3 -1.7858  4.7939   1
  -4  -7  -3 198.755  18.045   1
  -4  -7  -3 180.110  17.837   2
   4  -7   3 168.393  18.385   1
   4   7   3 163.507  15.985   1
  -4   7  -3 174.783  18.529   3
  -5  -7  -3 -6.2056  4.0659   2
   5  -7   3 -4.3467  5.1982   1
  -5  -7  -3 4.51537 5.81461   1
  -5   7  -3 4.15306 7.29894   3
   5   7   3 0.71712 3.74263   1
   6  -7   3 100.501  14.833   1
  -6  -7  -3 105.482  13.897   1
  -6  -7  -3 107.357  14.669   2
  -6   7  -3 97.9492 14.9435   3
   6   7   3 106.560  13.319   1
  -7  -7  -3 -1.2249  6.1167   2
   7  -7   3 3.38125 6.02235   1
  -7   7  -3 -5.7990  5.4284   3
   7   7   3 4.85032 4.72590   1
  -8  -7  -3 29.2738  9.7441   2
   8  -7   3 26.7851  9.0815   1
  -8   7  -3 28.9651 10.0883   3
   8   7   3 26.4516  7.6734   1
   9  -7   3 4.84326 7.34544   1
  -9  -7  -3 11.4658  7.5770   2
  -9   7  -3 -4.4367  5.7754   3
   9   7   3 -2.5289  6.3191   1
 -10  -7  -3 16.1709  8.6398   2
  10  -7   3 18.4057  8.6100   1
 -10   7  -3 14.1652  8.7465   3
  10   7   3 15.8830  7.2985   1
 -11  -7  -3 7.38489 7.05994   2
  11  -7   3 3.94783 7.93976   1
 -11   7  -3 3.93350 9.60105   3
  11   7   3 6.19094 6.60636   1
  12  -7   3 -6.5892  5.2511   1
 -12  -7  -3 1.37201 6.48000   2
  12   7   3 -3.6279  5.7696   1
 -12   7  -3 8.89642 8.22280   3
  13  -7   3 -2.0430  6.6815   1
 -13  -7  -3 1.20962 6.68770   2
  13   7   3 -5.8696  5.6515   1
 -13   7  -3 -7.3946  6.7943   3
 -14  -7  -3 8.28426 8.98212   2
  14  -7   3 13.3172  9.1933   1
  14   7   3 16.6281  9.1066   1
 -14   7  -3 2.69514 9.88855   3
  15  -7   3 -0.9307  6.3878   1
 -15  -7  -3 3.65885 7.92693   2
  15   7   3 1.79223 7.62300   1
 -15   7  -3 -1.8847  8.1082   3
  16  -7   3 10.7180  8.7959   1
 -16  -7  -3 14.3005  9.8725   2
  16   7   3 10.4902  9.2834   1
 -16   7  -3  8.4309 10.7083   3
  17  -7   3 3.05612 8.23768   1
 -17  -7  -3 10.8832 10.2637   2
  17   7   3 3.61789 8.68629   1
 -17   7  -3 1.72113 8.88319   3
  18  -7   3 1.98943 8.84300   1
 -18  -7  -3 11.4690 11.7213   2
  18   7   3 -7.1008  8.7125   1
 -18   7  -3 -0.0438 12.2421   3
  19  -7   3 14.7938 10.1925   1
 -19  -7  -3  7.2121 10.5277   2
  19   7   3  3.8841 10.4939   1
 -19   7  -3 -3.2742 10.2459   3
  20  -7   3 10.7138 10.8426   1
 -20  -7  -3  0.0102 12.1639   2
 -20   7  -3 -14.767  10.400   3
  20   7   3 16.6452 13.5067   1
 -21  -7  -3  5.4223 12.1817   2
  21  -7   3 14.3349 11.1480   1
  21   7   3  0.0303 12.6044   1
 -21   7  -3 -22.049  11.817   3
 -21  -8   3  7.3357 13.1051   2
 -21   8   3 21.3201 14.9704   3
  21   8  -3 -9.8205  9.7767   1
 -20  -8   3 -6.2499  8.8457   2
  20   8  -3 -20.461   9.661   1
 -20   8   3  4.8672 10.4180   3
 -19  -8   3 -11.172   8.521   2
 -19   8   3 21.2475 12.8887   3
  19   8  -3 2.71766 9.81049   1
 -18  -8   3 5.29109 9.97794   2
  18   8  -3 13.3440 10.2882   1
 -18   8   3 12.1430 12.1007   3
 -17  -8   3 -11.527   7.557   2
  17  -8  -3 -8.4484  7.6995   1
 -17   8   3 5.55952 7.94937   3
  17   8  -3 -5.0207  9.4088   1
 -16  -8   3 33.5334 13.5220   2
  16  -8  -3 29.0817 10.8619   1
 -16   8   3 25.3074 11.9979   3
  16   8  -3 16.9663 10.8841   1
 -15  -8   3 6.94557 9.30574   2
  15  -8  -3 -3.5735  6.0531   1
  15   8  -3  9.9976 10.1645   1
 -15   8   3 6.01241 9.00658   3
 -14  -8   3 44.7490 13.4350   2
  14  -8  -3 84.1327 15.3982   1
  14   8  -3 60.3695 14.1515   1
 -14   8   3 57.6653 14.8798   3
 -13  -8   3 6.71572 9.46279   2
  13  -8  -3 -0.8088  6.1342   1
  13   8  -3 7.01854 7.80651   1
 -13   8   3 11.4650  9.0069   3
 -12  -8   3 87.5721 16.3759   2
  12  -8  -3 97.7960 15.9923   1
 -12   8   3 102.059  17.622   3
  12   8  -3 103.150  16.057   1
 -11  -8   3 -8.5524  5.4002   2
  11  -8  -3 6.82216 6.46488   1
 -11   8   3 -8.4313  8.6499   3
  11   8  -3 1.37889 6.01596   1
 -10  -8   3 134.055  18.559   1
 -10  -8   3 131.660  18.448   2
  10  -8  -3 164.923  19.270   1
  10   8  -3 108.414  16.154   1
   9  -8  -3 57.4499 12.0965   1
  -9  -8   3 37.1969 10.5568   1
  -9  -8   3 47.7592 12.6883   2
   9   8  -3 15.1277  9.2392   1
   8  -8  -3 219.939  21.712   1
  -8  -8   3 243.867  24.532   1
  -8  -8   3 278.640  25.544   2
   8   8  -3 262.052  24.445   1
  -7  -8   3 7.21506 6.19551   2
   7  -8  -3 20.9085  8.7090   1
  -7  -8   3 8.69490 7.59891   1
   7   8  -3 2.44559 6.54710   1
  -6  -8   3 212.971  20.746   2
  -6  -8   3 211.936  21.526   1
   6  -8  -3 182.006  19.523   1
   6   8  -3 158.304  19.211   1
  -5  -8   3 34.1332  9.9898   1
  -5  -8   3 41.2909 10.1513   2
   5  -8  -3 21.3720  8.5622   1
  -5   8   3 42.8581  8.1405   2
   4  -8  -3 162.722  17.936   1
  -4  -8   3 166.316  17.883   2
  -4  -8   3 120.016  16.558   1
  -4   8   3 167.013  14.898   2
  -3  -8   3 -0.9945  5.1114   2
   3  -8  -3 4.32827 6.10288   1
  -3  -8   3 -0.0201  5.9063   1
   3  -8  -3 3.11982 5.09097   2
  -2  -8   3 99.2490 12.8022   2
   2  -8  -3 50.3525 11.1405   1
  -2  -8   3 114.101  16.149   1
   2  -8  -3 81.6990 11.3941   2
   2   8  -3 100.856  13.095   3
   1  -8  -3 0.52749 4.95177   1
  -1  -8   3 2.49710 6.22135   1
  -1  -8   3 0.77289 4.95973   2
   1  -8  -3 7.96618 5.10781   2
   1   8  -3 -4.1262  5.6811   3
   0  -8   3 43.9295 10.8188   1
   0  -8  -3 24.0917  9.1670   1
   0  -8  -3 36.6634  9.0228   2
   0   8  -3 34.2051  8.7167   3
   1  -8   3 9.78509 6.82835   1
  -1  -8  -3 2.31377 5.80499   2
  -1  -8  -3 -2.3804  4.6036   1
  -1   8  -3 -3.9969  5.2962   3
  -2  -8  -3 -8.7921  4.4879   1
  -2  -8  -3 3.09232 6.45289   2
   2  -8   3 -2.4556  6.6725   1
  -2   8  -3 10.8486  6.6838   3
   2   8   3 -3.0918  5.6319   1
  -3  -8  -3 6.70971 6.35046   1
   3  -8   3 4.41328 6.48639   1
  -3  -8  -3 2.24559 5.79333   2
  -3   8  -3 0.49107 7.02836   3
   3   8   3 -0.4703  6.1076   1
   4  -8   3 51.6354 11.4408   1
  -4  -8  -3 77.7605 13.3147   1
  -4  -8  -3 68.4549 12.5663   2
   4   8   3 81.6930 12.7828   1
  -4   8  -3 56.2653 12.6544   3
  -5  -8  -3 6.23960 6.94291   1
   5  -8   3 3.04043 6.51489   1
  -5  -8  -3 2.50131 6.12081   2
   5   8   3 2.90729 6.36959   1
  -5   8  -3 0.20645 6.23934   3
   6  -8   3 85.4685 14.8687   1
  -6  -8  -3 86.6084 13.7362   1
  -6  -8  -3 67.3455 13.2346   2
   6   8   3 78.8054 12.3884   1
  -6   8  -3 93.9331 15.6074   3
   7  -8   3 -3.5509  6.2904   1
  -7  -8  -3 9.08973 6.96451   2
   7   8   3 12.5672  7.4824   1
  -7   8  -3 14.1448  8.2143   3
  -8  -8  -3 93.3432 16.0851   2
   8  -8   3 97.1711 16.2148   1
  -8   8  -3 101.844  16.906   3
   8   8   3 80.9876 14.0771   1
   9  -8   3 6.35809 8.11170   1
  -9  -8  -3 -4.7266  6.1479   2
   9   8   3 2.04375 5.87475   1
  -9   8  -3 11.0059 10.0294   3
  10  -8   3 107.348  18.138   1
 -10  -8  -3 135.734  19.614   2
 -10   8  -3 94.6896 17.0516   3
  10   8   3 100.922  15.727   1
 -11  -8  -3 -0.7005  6.9156   2
  11  -8   3 0.00400 7.05465   1
  11   8   3 2.04864 6.43991   1
 -11   8  -3 0.12683 8.81272   3
  12  -8   3 74.7503 15.7928   1
 -12  -8  -3 71.6506 15.4812   2
 -12   8  -3 46.2682 14.3011   3
  12   8   3 58.9291 14.0699   1
  13  -8   3 1.50086 7.91538   1
 -13  -8  -3 3.09447 8.11090   2
 -13   8  -3  7.0915 10.1244   3
  13   8   3 4.47566 9.14786   1
  14  -8   3 10.8329  9.1042   1
 -14  -8  -3 27.8545 11.5845   2
 -14   8  -3 24.9918 14.0763   3
  14   8   3 38.6515 12.4676   1
  15  -8   3 11.3250 10.1129   1
 -15  -8  -3 1.88645 8.55495   2
  15   8   3 14.7806  9.9323   1
 -15   8  -3 -8.2299  9.4483   3
  16  -8   3 28.5170 12.7211   1
 -16  -8  -3 23.0248 13.1455   2
  16   8   3 18.5154 11.1564   1
 -16   8  -3 -4.4938  9.2958   3
  17  -8   3 13.6700 11.4281   1
 -17  -8  -3 -4.3475 11.7880   2
 -17   8  -3 -3.9004 10.6608   3
  17   8   3 10.2524 10.5865   1
 -18  -8  -3  9.6741 13.2825   2
  18  -8   3 13.0737 10.6692   1
  18   8   3  5.7308 10.9727   1
 -18   8  -3 11.6733 12.3161   3
  19  -8   3 -5.3686 10.6877   1
 -19  -8  -3 -0.0343 10.9525   2
  19   8   3 -7.7220  9.9390   1
 -19   8  -3 -17.051   9.283   3
 -20  -8  -3 -11.983  11.051   2
  20  -8   3  5.6853 11.8219   1
 -20   8  -3  4.6005 12.7701   3
  20   8   3 14.6857 15.5919   1
 -19  -9   3  6.3128 11.4215   2
  19   9  -3  8.0116 14.0269   1
 -19   9   3  8.5588 12.2483   3
 -18  -9   3 20.6775 12.4936   2
 -18   9   3 22.2498 12.1591   3
  18   9  -3 16.6229 12.0546   1
 -17  -9   3 14.1634 13.7474   2
 -17   9   3 23.2143 12.0086   3
  17   9  -3 14.0228 10.8878   1
 -16  -9   3 10.4765 12.5507   2
 -16   9   3 40.6265 14.7263   3
  16   9  -3 29.5018 13.5069   1
 -15  -9   3  6.3827 10.8322   2
 -15   9   3 10.4323  9.3239   3
  15   9  -3 4.17649 9.09105   1
 -14  -9   3 42.7550 13.4939   2
  14   9  -3 -3.5095  9.0881   1
 -14   9   3 30.5492 12.7874   3
 -13  -9   3 25.3111 11.3055   2
  13   9  -3 -1.6506  8.1362   1
 -13   9   3 30.6586 11.9228   3
  12  -9  -3 9.84996 8.68019   1
 -12  -9   3 14.6131  9.5974   2
  12   9  -3 -1.2194  6.9939   1
 -12   9   3 5.85771 8.32438   3
 -11  -9   3 -2.9414  7.0174   1
  11  -9  -3 -0.7405  5.8243   1
 -11  -9   3 -5.3890  7.5957   2
  11   9  -3 3.66810 7.62602   1
 -11   9   3 14.1015  9.2395   3
 -10  -9   3 2.78691 8.47266   2
  10  -9  -3 1.84848 7.31393   1
 -10  -9   3 -2.6374  7.7677   1
  10   9  -3 -6.5703  5.6507   1
 -10   9   3 -2.7073  6.5608   3
  -9  -9   3 -0.4787  8.6838   1
   9  -9  -3 9.45986 8.23409   1
  -9  -9   3 14.7385  9.6261   2
  -9   9   3 0.93726 7.64041   3
   9   9  -3 8.36571 8.59575   1
  -8  -9   3 5.11829 8.90059   2
   8  -9  -3 -1.8133  5.8896   1
  -8  -9   3 -10.405   5.099   1
  -8   9   3 2.99718 8.69321   3
   8   9  -3 -0.5475  6.4778   1
   7  -9  -3 -3.3518  6.0991   1
  -7  -9   3 1.67977 6.73902   2
  -7  -9   3 3.54329 7.15724   1
   7   9  -3 -2.2395  6.5071   1
  -6  -9   3 22.2178  8.7641   1
   6  -9  -3 26.5096  9.7809   1
  -6  -9   3 40.6643 11.3870   2
   6   9  -3 20.5875  9.0935   1
  -5  -9   3 28.6298  9.4037   2
   5  -9  -3 38.9457 10.8378   1
  -5  -9   3 24.2224 10.0066   1
   5   9  -3 22.8819  9.4709   1
  -4  -9   3 73.2408 14.7836   1
   4  -9  -3 78.7770 13.2444   1
  -4  -9   3 89.7798 13.7266   2
  -3  -9   3 18.1912 11.0444   1
  -3  -9   3 24.9602  8.6067   2
   3  -9  -3 8.49830 7.40776   1
  -2  -9   3 132.875  18.505   1
   2  -9  -3 116.535  16.054   1
   2  -9  -3 127.415  14.980   2
   1  -9  -3 29.2568  9.0989   2
  -1  -9   3 24.2913  9.7197   1
   1  -9  -3 22.5088  9.1307   1
   1   9  -3 17.7227  8.3934   3
   0  -9  -3 95.4833 15.0430   1
   0  -9   3 91.4056 16.4088   1
   0  -9  -3 111.946  14.715   2
   0   9  -3 118.762  16.154   3
   1  -9   3 43.2287 11.5671   1
  -1  -9  -3 25.0436  9.6670   2
  -1  -9  -3 33.2336  9.7724   1
  -1   9  -3 57.7211 11.9555   3
  -2  -9  -3 81.0077 13.6902   1
   2  -9   3 87.6277 16.1508   1
  -2  -9  -3 96.3208 14.7679   2
   2   9   3 72.0819 13.4154   1
  -2   9  -3 59.2663 12.9365   3
  -3  -9  -3 76.2189 13.3482   2
  -3  -9  -3 40.7994 10.3048   1
   3  -9   3 52.8277 13.1343   1
   3   9   3 82.9874 13.3476   1
  -3   9  -3 58.8168 12.7971   3
   4  -9   3 44.1599 12.8829   1
  -4  -9  -3 48.2189 11.4199   1
  -4  -9  -3 68.6895 13.2504   2
  -4   9  -3 74.2110 15.1180   3
   4   9   3 57.0370 11.7334   1
   5  -9   3 15.7943  9.1139   1
  -5  -9  -3 16.9526  9.5360   2
  -5  -9  -3 27.7700 10.3598   1
  -5   9  -3 26.5348 11.2123   3
   5   9   3 29.1405  9.6262   1
   6  -9   3 37.3524 11.3286   1
  -6  -9  -3 49.5465 12.8352   2
  -6  -9  -3 40.1399 12.0407   1
   6   9   3 49.9242 12.0182   1
  -6   9  -3 38.6898 12.0717   3
   7  -9   3 15.3294  9.9853   1
  -7  -9  -3 4.34998 8.55487   1
  -7  -9  -3 7.79701 7.90034   2
  -7   9  -3 7.20516 9.52670   3
   7   9   3 17.4987  8.4022   1
  -8  -9  -3 24.6209  9.7655   2
   8  -9   3 12.5472  8.2770   1
   8   9   3 9.43272 7.57410   1
  -8   9  -3 0.98500 8.51489   3
   9  -9   3 15.4714  9.3901   1
  -9  -9  -3 5.58853 8.02561   2
  -9   9  -3 6.81788 9.32966   3
   9   9   3 27.2601 10.7666   1
  10  -9   3 -6.2802  6.5613   1
 -10  -9  -3 -1.1973  8.1767   2
  10   9   3 -6.1879  6.2813   1
 -10   9  -3 2.41493 9.64705   3
 -11  -9  -3 3.69806 7.26905   2
  11  -9   3 1.56801 8.48515   1
  11   9   3 5.44677 8.09660   1
 -11   9  -3 -3.2399  9.1086   3
  12  -9   3 -4.9941  7.0994   1
 -12  -9  -3 -0.5822  8.6126   2
 -12   9  -3 -7.0054  8.6579   3
  12   9   3 -0.4679  7.3143   1
 -13  -9  -3  7.6082 10.0926   2
  13  -9   3 2.66097 8.46012   1
  13   9   3 1.16801 8.01913   1
 -13   9  -3 19.2433 11.7246   3
 -14  -9  -3 2.72920 9.15539   2
  14  -9   3 -5.4983  9.5217   1
  14   9   3  8.9804 10.3853   1
 -14   9  -3 -3.6161  9.8706   3
  15  -9   3 12.5346 10.7573   1
 -15  -9  -3  8.5731 11.5615   2
  15   9   3 4.14931 8.96049   1
 -15   9  -3 -11.300   9.361   3
  16  -9   3 -2.5417  8.7587   1
 -16  -9  -3 2.41342 9.69953   2
  16   9   3 -9.1659 10.5909   1
 -16   9  -3 24.3897 16.2645   3
 -17  -9  -3 -5.3871 10.4778   2
  17  -9   3  9.1043 10.0924   1
  17   9   3 17.0921 11.5373   1
 -17   9  -3 -12.074  10.377   3
 -18  -9  -3  5.7904 13.2934   2
  18  -9   3 11.1012 12.9905   1
 -18   9  -3 -8.8459 12.1147   3
  18   9   3  8.9843 11.8252   1
 -17 -10   3  5.9994 13.3077   2
 -17  10   3  8.2349 13.1242   3
  17  10  -3 -10.839   9.284   1
 -16 -10   3 16.9402 11.8498   2
  16  10  -3 -4.6586 11.4316   1
 -16  10   3  9.0343 11.9558   3
 -15 -10   3  7.8063 10.1966   2
 -15  10   3 1.99080 9.96721   3
  15  10  -3 -6.6277  9.2027   1
 -14 -10   3 17.7179 13.0279   2
  14  10  -3 15.7201 11.6500   1
 -14  10   3 19.9287 12.4913   3
 -13 -10   3 -8.1050  9.8625   2
  13  10  -3 16.5394  9.9202   1
 -13  10   3 18.2204 11.7272   3
 -12 -10   3 10.1280 10.9920   2
 -12  10   3  6.8709 11.5995   3
  12  10  -3 6.86552 9.48013   1
 -11 -10   3 13.8524 10.7539   2
 -11 -10   3 29.0043 12.1846   1
  11  10  -3 23.1812 10.1562   1
 -11  10   3 12.3697  9.6963   3
 -10 -10   3 40.9942 13.9930   1
 -10 -10   3 27.8623 10.7742   2
 -10  10   3 27.0485 11.1962   3
  10  10  -3  7.2302 10.0606   1
  -9 -10   3 16.4184 11.5946   1
  -9 -10   3 20.3257 10.3541   2
   9  10  -3 19.2501  9.7714   1
  -9  10   3 19.7465 11.3814   3
  -8 -10   3 30.7813 10.6190   1
  -8 -10   3 31.9745 11.4214   2
  -8  10   3 30.9455 11.2953   3
   8  10  -3 35.3081 11.9566   1
  -7 -10   3 29.3269 13.1215   1
   7 -10  -3 24.3756 11.1668   1
  -7 -10   3 8.26918 9.25206   2
  -7  10   3 19.0311 10.7658   3
   7  10  -3 22.9448 11.8334   1
  -6 -10   3 47.8203 12.5125   2
  -6 -10   3 48.5677 13.0051   1
   6 -10  -3 20.5159 10.5446   1
  -6  10   3 46.6939 12.6556   3
   6  10  -3 30.0412 11.7926   1
  -5 -10   3 11.0596  8.6763   2
  -5 -10   3 14.6354 10.2654   1
   5 -10  -3 34.9375 10.9121   1
   5  10  -3 23.3416 11.9168   1
  -5  10   3 18.6894  8.7297   3
   4 -10  -3 13.2189  8.1719   1
  -4 -10   3 -4.6523  6.8717   1
  -4  10   3 22.6545 10.1629   3
   3 -10  -3 7.13110 8.93541   1
  -3 -10   3 21.3834 10.7656   1
  -3  10   3 12.3898  8.9485   3
  -2 -10   3 7.48316 8.69205   1
   2 -10  -3 12.1111  7.9317   1
  -2  10   3 3.95820 6.90167   3
   1 -10  -3 -7.3390  6.3594   1
  -1 -10   3 1.62521 7.40601   1
  -1  10   3 9.32500 8.68856   3
   0 -10  -3 4.52206 7.01534   2
   0 -10   3 -2.3985  7.6525   1
   0 -10  -3 8.89171 8.02277   1
  -1 -10  -3 -8.8885  5.8910   2
   1 -10   3 -6.9116  8.7798   1
  -1 -10  -3 -2.5005  6.9901   1
  -1  10  -3 -6.9818  6.3557   3
   1  10   3 5.28226 7.48690   1
   2 -10   3 -4.6788  6.1101   1
  -2 -10  -3 -6.4204  5.4012   1
  -2 -10  -3 -8.2487  5.5520   2
  -2  10  -3 -8.7267  7.8217   3
   2  10   3 6.54705 7.08990   1
  -3 -10  -3 -2.9872  5.6689   1
  -3 -10  -3 13.6171  8.8384   2
   3 -10   3 7.84098 8.74348   1
  -3  10  -3 1.36911 9.18363   3
   3  10   3 -0.3788  6.6920   1
  -4 -10  -3 28.8681 10.2877   1
  -4 -10  -3 11.7935  8.3121   2
   4 -10   3 6.54054 8.88920   1
   4  10   3 0.44359 7.02704   1
  -4  10  -3 27.4476 10.8002   3
  -5 -10  -3 13.5496  9.1810   2
   5 -10   3 2.26814 9.92091   1
  -5 -10  -3 5.45883 8.84153   1
   5  10   3 14.4309  9.6167   1
  -5  10  -3 13.1465  9.5484   3
  -6 -10  -3 24.9561 10.0767   1
   6 -10   3 17.4152  9.9945   1
  -6 -10  -3 23.1808 11.3259   2
   6  10   3 25.7914  9.2431   1
  -6  10  -3 11.3962  9.3947   3
  -7 -10  -3 8.67079 8.09736   2
   7 -10   3 -1.1772  8.5822   1
  -7 -10  -3 15.8614 10.2148   1
  -7  10  -3 30.3786 13.3849   3
   7  10   3 7.55249 8.73028   1
  -8 -10  -3 43.5323 13.5693   2
   8 -10   3 13.8338 10.8860   1
  -8  10  -3 17.9820 11.1778   3
   8  10   3 24.5755 10.3889   1
  -9 -10  -3 31.9453 11.2184   2
   9 -10   3 -2.0004  9.8286   1
   9  10   3 10.8054  8.8255   1
  -9  10  -3 23.9877 12.0512   3
 -10 -10  -3  7.7727 10.1433   2
  10 -10   3 21.8325 10.8421   1
 -10  10  -3 22.1841 12.0111   3
  10  10   3 -0.0415  8.2338   1
 -11 -10  -3 8.31099 9.18421   2
  11 -10   3 18.4992 12.2431   1
  11  10   3 0.91634 7.70539   1
 -11  10  -3 21.4879 12.8270   3
  12 -10   3 -6.0781 10.4136   1
 -12 -10  -3 19.1314 12.0100   2
  12  10   3 31.2692 11.9630   1
 -12  10  -3 13.2452 12.8085   3
  13 -10   3 19.3226 13.9666   1
 -13 -10  -3 37.9779 15.8342   2
 -13  10  -3 -15.080   9.911   3
  13  10   3  8.8083 11.5363   1
  14 -10   3  3.1742 10.1975   1
 -14 -10  -3 20.7925 12.2259   2
  14  10   3  6.0582 10.5704   1
 -14  10  -3 23.4616 16.7721   3
 -15 -10  -3 -6.7753  9.8945   2
  15 -10   3  1.9241 11.6995   1
  15  10   3  3.2410 11.5813   1
 -15  10  -3 -11.094  12.626   3
  16 -10   3 0.80090 9.31157   1
 -16 -10  -3 -4.7667 11.8102   2
  16  10   3 -0.4061 10.2403   1
 -16  10  -3  5.2006 16.1413   3
 -14 -11   3 -9.7914 10.4550   2
  14  11  -3  5.0080 10.5103   1
 -14  11   3 -4.3264 12.6796   3
 -13 -11   3 -2.3593  8.2565   2
  13  11  -3 -2.5268  9.0437   1
 -13  11   3 22.9362 12.3078   3
 -12 -11   3 -6.0280 10.2948   2
  12  11  -3 -8.1514  9.4581   1
 -12  11   3 24.7832 13.1820   3
 -11 -11   3 -13.261   8.990   2
 -11  11   3  9.7993 11.8235   3
  11  11  -3 -4.2657  7.5238   1
 -10 -11   3 -0.1012  9.7358   2
 -10 -11   3 2.74078 8.97044   1
 -10  11   3 2.93660 8.68792   3
  10  11  -3 -7.2574  8.4575   1
  -9 -11   3  5.6057 10.3960   1
  -9 -11   3 5.79672 8.81254   2
  -9  11   3 20.6959 10.7529   3
   9  11  -3 0.38194 8.50215   1
  -8 -11   3 -1.3738  8.7115   2
  -8 -11   3 6.86981 9.32240   1
  -8  11   3 3.01388 8.09129   3
   8  11  -3 6.99025 9.04950   1
  -7 -11   3 0.90265 8.31102   1
   7  11  -3 -2.7927  8.6853   1
  -7  11   3 12.7402  9.8775   3
  -6 -11   3 -4.4483  7.4225   1
  -6  11   3 15.0809  9.1643   3
   6  11  -3 5.82763 9.43984   1
  -5 -11   3 13.5547  9.8919   1
  -5  11   3 10.1027  9.3179   3
   5  11  -3  8.2628 10.9419   1
  -4 -11   3 18.0090 11.4348   1
  -4  11   3 16.5958 10.0493   3
   4  11  -3 17.5219 12.8401   1
  -3 -11   3 14.7963 11.9977   1
  -3  11   3 35.1601 13.0505   3
  -2 -11   3 5.34301 9.83733   1
   1 -11  -3 10.6762  9.8562   1
  -1 -11   3 4.27229 9.74953   1
   0 -11   3 17.6871 11.6601   1
   0 -11  -3 13.4046 10.3151   1
  -1 -11  -3 31.9895 11.0729   1
   1 -11   3 35.2636 15.1088   1
   1  11   3 6.05422 8.65755   1
   2 -11   3 25.8645 11.5883   1
  -2 -11  -3 17.8527 10.7849   1
   2  11   3 30.9924 11.9999   1
  -3 -11  -3 8.15351 8.54886   1
   3 -11   3 28.5499 11.3309   1
  -3 -11  -3 19.3611 10.8364   2
   3  11   3 26.5303 11.6974   1
  -3  11  -3  3.9671 10.7181   3
  -4 -11  -3 9.29864 9.06697   1
  -4 -11  -3 14.6326  9.5183   2
   4 -11   3  5.0945 10.2121   1
   4  11   3 30.8919 10.9796   1
  -4  11  -3  5.8409 11.2060   3
  -5 -11  -3 15.8224 11.2063   2
   5 -11   3 25.4487 11.3355   1
  -5 -11  -3 -3.4630  8.8774   1
   5  11   3 26.6792 11.1096   1
  -5  11  -3 0.83376 9.16928   3
  -6 -11  -3 21.7909 12.4327   2
   6 -11   3  8.4265 10.6213   1
  -6 -11  -3  2.9161 10.3707   1
  -6  11  -3 -1.1643  8.6444   3
   6  11   3 14.5327  9.9595   1
   7 -11   3 1.13453 9.07015   1
  -7 -11  -3 17.5588 10.2250   2
  -7  11  -3 15.6981 12.9073   3
   7  11   3 18.0465 10.2491   1
   8 -11   3 8.42801 9.16043   1
  -8 -11  -3  8.5620 10.6985   2
  -8  11  -3 10.7740 11.6411   3
   8  11   3 -0.9574  8.9674   1
   9 -11   3  1.6946 11.3616   1
  -9 -11  -3 17.5174 11.7451   2
  -9  11  -3 -14.238   8.371   3
   9  11   3 0.55447 8.43162   1
  10 -11   3 -4.8214  8.9794   1
 -10 -11  -3 -1.9786 10.7470   2
  10  11   3 -7.3771  7.8257   1
 -10  11  -3 -3.5336 10.5947   3
  11 -11   3 12.0182 11.5943   1
 -11 -11  -3 13.1173 11.0332   2
 -11  11  -3 -8.8939  9.5300   3
  11  11   3 -0.2161  8.9540   1
 -12 -11  -3 -9.6371 10.3456   2
  12 -11   3 -0.2771 10.2429   1
 -12  11  -3 -16.425  10.641   3
  12  11   3 -10.982   9.504   1
 -13 -11  -3 -0.8555 11.7445   2
  13 -11   3  5.5040 10.8383   1
  13  11   3 0.16433 9.00611   1
 -13  11  -3 -4.2396 11.9932   3
  10  12  -3 10.4426 12.7651   1
 -10  12   3 -9.6638  9.0569   3
  -9 -12   3 15.4476 12.2729   1
  -9  12   3  9.7536 12.4011   3
   9  12  -3  1.4869 10.0068   1
  -8 -12   3 -8.9419 10.7461   1
   8  12  -3 6.02197 8.64698   1
  -8  12   3 9.41098 9.75877   3
  -7 -12   3 7.21593 9.67489   1
   7  12  -3 16.6220 13.1040   1
  -7  12   3 18.0828 12.1659   3
  -6 -12   3  9.5681 11.1109   1
  -6  12   3 17.6498 11.9956   3
   6  12  -3 -1.4424  9.4773   1
  -5 -12   3 14.7174 10.0131   1
   5  12  -3 10.5248 11.0893   1
  -4 -12   3 -5.9428 10.1494   1
   4  12  -3 14.8162 13.5959   1
  -3 -12   3 19.6748 11.3503   1
   3  12  -3 19.4041 12.1771   1
  -2 -12   3 -6.8020  8.3188   1
  -1 -12   3  1.4113 11.2233   1
   0 -12   3 -8.9550  8.8877   1
   1 -12   3 -8.0239 10.5060   1
   2 -12   3 -15.902   8.590   1
   3 -12   3 -11.500   9.860   1
   4 -12   3 -13.229  10.690   1
   4  12   3 -0.4918  7.4741   1
  -5 -12  -3  6.9925 11.9937   2
   5 -12   3  5.3088 11.7908   1
  -5  12  -3 -6.1671 11.8134   3
   5  12   3  8.1069 10.6590   1
  -6 -12  -3 -10.051   9.201   2
   6 -12   3 -0.9466 10.1735   1
  -6  12  -3 -1.1372 13.0518   3
   6  12   3 12.9094 10.2292   1
   7 -12   3 12.9385 10.5672   1
  -7 -12  -3  4.1051 10.0314   2
  -7  12  -3 -10.813  12.428   3
   7  12   3  9.8572 10.4145   1
   8 -12   3 10.4296 13.6995   1
  -8 -12  -3  7.0755 11.5967   2
  -8  12  -3 -13.823  10.428   3
   8  12   3 -9.7630  8.2298   1
  27   0  -4  1.2505 12.7216   1
  26   0  -4 16.8987 12.2425   1
  25   0  -4 -9.0186 10.6245   1
  24   0  -4 14.2771 11.3861   1
 -23   0   4 10.1219 10.1709   2
  23   0  -4 0.78673 9.81613   1
 -22   0   4 101.290  17.267   2
  22   0  -4 79.9140 17.4266   1
 -21   0   4 6.69660 6.72522   2
  21   0  -4 6.58286 9.00188   1
 -20   0   4 193.542  20.991   2
  20   0  -4 143.180  20.009   1
  19   0  -4 8.51098 8.71808   1
 -19   0   4 3.67902 8.32380   2
  18   0  -4 80.0453 15.2979   1
 -18   0   4 90.5418 14.4890   2
 -17   0   4 1.93307 8.40306   2
  17   0  -4 -0.6216  6.4892   1
  16   0  -4 108.911  15.737   1
 -16   0   4 87.1303 10.9196   3
 -16   0   4 87.4068 13.5385   2
 -15   0   4 2.51432 4.31572   3
  15   0  -4 -0.3554  5.7227   1
 -15   0   4 1.91720 6.29208   2
  14   0  -4 284.637  18.794   1
 -14   0   4 243.065  17.055   2
  13   0  -4 3.08764 5.20702   1
 -13   0   4 5.73382 6.22333   2
 -12   0   4 189.062  14.491   2
  12   0  -4 219.130  15.128   1
  11   0  -4 -2.9546  3.6829   1
 -11   0   4 6.05408 5.52241   2
  10   0  -4 438.293  20.267   1
 -10   0   4 456.775  20.764   2
   9   0  -4 0.18640 2.45607   3
  -9   0   4 -2.6028  4.5539   2
   9   0  -4 4.27320 3.86641   1
  -8   0   4 1.03576 4.35248   2
   8   0  -4 -0.1971  2.8143   1
   8   0  -4 -0.3601  2.1947   3
  -7   0   4 5.70537 4.16856   2
   7   0  -4 -2.8342  1.9605   3
   7   0  -4 -0.2285  2.8884   1
   6   0  -4 863.881  24.906   1
  -6   0   4 801.236  25.848   2
   6   0  -4 826.759  24.155   3
   5   0  -4 1.93424 1.82368   3
  -5   0   4 0.03036 3.19852   2
   5   0  -4 -1.6736  1.5573   1
  -4   0   4 1333.26   35.94   2
   4   0  -4 1334.40   34.83   3
   4   0  -4 1399.99   33.73   1
   3   0  -4 -0.4437  1.2901   1
   3   0  -4 -2.2811  0.9518   3
   2   0  -4 633.104  17.793   3
  -2   0   4 620.901  17.901   2
  -1   0   4 -0.3967  1.4926   2
   1   0  -4 -2.7711  1.3783   3
   0   0  -4 24.8071  3.3631   3
   0   0   4 22.0884  2.7773   2
   1   0   4 -2.9685  1.3855   1
  -1   0  -4 0.34544 2.15343   3
   1   0   4 -3.0093  1.2756   2
  -2   0  -4 9639.19  216.73   2
  -2   0  -4 9286.16  218.61   3
   2   0   4 9656.12  215.60   1
   3   0   4 -2.3659  2.6284   1
  -3   0  -4 3.04822 2.94405   3
  -3   0  -4 1.16386 1.65212   2
  -4   0  -4 263.305  11.002   3
   4   0   4 275.266  12.708   1
  -4   0  -4 265.426  10.312   2
  -5   0  -4 -0.0591  1.9599   2
   5   0   4 -3.3123  2.3498   1
  -5   0  -4 -3.8451  2.3189   3
  -6   0  -4 2092.27   53.48   3
   6   0   4 1999.05   56.51   1
  -6   0  -4 2031.94   52.58   2
  -7   0  -4 2.60162 3.88734   3
  -7   0  -4 0.41927 2.54158   2
   7   0   4 -2.4080  3.4285   1
  -8   0  -4 3262.45   82.66   2
  -8   0  -4 3362.46   83.43   3
   8   0   4 3246.45   87.64   1
  -9   0  -4 -0.6559  4.2608   3
  -9   0  -4 0.91844 3.13324   2
   9   0   4 4.71307 5.10786   1
 -10   0  -4 394.290  17.458   2
  10   0   4 381.306  21.654   1
 -10   0  -4 414.150  17.992   3
 -11   0  -4 -2.9024  4.3519   3
 -11   0  -4 0.15567 3.57084   2
  11   0   4 -3.1254  4.1428   1
 -12   0  -4 82.5818  9.8517   2
 -12   0  -4 66.9464  9.4888   3
  12   0   4 61.1057 11.1685   1
 -13   0  -4 -6.2615  4.8645   3
 -13   0  -4 -4.3639  3.9361   2
  13   0   4 -1.0300  5.2621   1
  14   0   4 38.9498 11.6291   1
 -14   0  -4 32.6469  8.4518   2
 -14   0  -4 28.5095  8.1410   3
 -15   0  -4 -4.9085  4.7478   2
  15   0   4 -1.5615  6.6686   1
 -15   0  -4 -6.3265  6.2423   3
  16   0   4 28.6622 10.6738   1
 -16   0  -4 31.4056  9.7017   3
 -16   0  -4 49.5525  9.6362   2
  17   0   4 3.03161 7.66907   1
  18   0   4 89.6734 16.3833   1
  19   0   4 13.5249  9.7478   1
  20   0   4 23.1403 11.5177   1
  21   0   4  7.1984 11.8187   1
  22   0   4 43.8050 14.9500   1
  23   0   4 3.23099 8.81944   1
  24   0   4 17.6850 12.1978   1
  25   0   4  3.1878 10.5567   1
  27  -1  -4 15.5805 11.0587   1
  27   1  -4  1.9225 13.0908   1
  26  -1  -4 -4.3726 10.0022   1
  26   1  -4  2.4315 10.4740   1
  25  -1  -4 -2.8315  9.5428   1
  25   1  -4  7.9259 10.4828   1
  24  -1  -4 19.9610 13.3592   1
 -24  -1   4 16.3676 12.1664   2
  24   1  -4 14.1646 11.6761   1
  23  -1  -4 -5.0382  9.6973   1
 -23  -1   4 -5.1131  9.5599   2
  23   1  -4 15.7368 10.4791   1
  22  -1  -4 14.2441 11.9183   1
 -22  -1   4 15.0938 10.5540   2
  22   1  -4 13.5500 10.0605   1
  21  -1  -4 0.65460 9.06374   1
 -21  -1   4 -2.4211  7.2687   2
 -21   1   4 15.5661  9.8117   2
  21   1  -4 0.26497 8.08021   1
 -20  -1   4 7.51533 8.01180   2
  20  -1  -4 -8.1690  7.0440   1
 -20   1   4 0.99635 8.01070   2
  20   1  -4 2.74815 9.21836   1
  19  -1  -4 18.6376  9.9608   1
 -19  -1   4 7.77846 8.49156   2
 -19   1   4 5.81755 7.99776   2
  19   1  -4  8.0166 10.0532   1
  18  -1  -4 0.76634 6.62124   1
 -18  -1   4 -10.424   7.192   2
 -18   1   4 3.25198 6.05155   3
  18   1  -4 7.99807 7.85941   1
 -18   1   4 14.8689  7.9165   2
 -17  -1   4 0.84282 6.92823   2
  17  -1  -4 9.00027 7.57065   1
  17   1  -4 14.6612  8.0269   1
 -17   1   4 6.81318 6.47840   3
 -17   1   4 10.5274  7.3451   2
 -16  -1   4 51.9441 10.6553   2
  16  -1  -4 64.0549 12.2454   1
 -16   1   4 59.4707 10.2077   3
 -16   1   4 50.0080 10.8728   2
  16   1  -4 53.0346 11.4851   1
 -15  -1   4 50.9643 10.9980   2
  15  -1  -4 39.0569 10.4362   1
 -15   1   4 42.7215  9.3908   2
  15   1  -4 56.7139 11.4976   1
 -14  -1   4 153.472  16.524   2
  14  -1  -4 154.194  16.642   1
 -14  -1   4 171.720  10.822   3
 -14   1   4 211.824  17.715   2
  14   1  -4 206.965  19.160   1
  13  -1  -4 8.80013 6.05214   1
 -13  -1   4 -0.8643  5.8161   2
  13   1  -4 20.3692  7.6706   1
 -13   1   4 12.8831  6.7903   2
  12  -1  -4 621.769  26.889   1
 -12  -1   4 577.470  26.329   2
 -12   1   4 639.755  25.556   2
  12   1  -4 607.823  26.745   1
  11  -1  -4 137.617  13.560   1
 -11  -1   4 168.198  15.436   2
  11   1  -4 163.614  14.521   1
 -11   1   4 136.983  12.875   2
 -10  -1   4 1470.58   46.73   2
  10  -1  -4 1498.72   45.85   1
  10   1  -4 1515.61   45.26   1
 -10   1   4 1484.05   44.19   2
  -9  -1   4 957.513  33.800   2
   9  -1  -4 933.687  32.379   1
   9   1  -4 1008.45   32.36   1
   9   1  -4 1030.32   28.18   3
  -9   1   4 1035.82   32.03   2
   8  -1  -4 582.302  21.287   3
   8  -1  -4 541.437  21.165   1
  -8  -1   4 600.347  23.247   2
  -8   1   4 578.681  20.647   2
   8   1  -4 584.819  21.075   1
   8   1  -4 578.336  17.718   3
   7  -1  -4 7.40544 3.22035   3
  -7  -1   4 5.24046 4.56487   2
   7  -1  -4 14.5128  4.2204   1
  -7   1   4 6.92307 3.66905   2
   7   1  -4 6.12322 3.07902   1
   7   1  -4 7.27966 2.32176   3
   6  -1  -4 1962.24   51.25   3
   6  -1  -4 1903.14   49.53   1
  -6  -1   4 1889.88   52.56   2
   6   1  -4 1888.61   49.36   1
   6   1  -4 1953.36   47.18   3
  -6   1   4 1938.77   49.93   2
  -5  -1   4 552.589  20.400   2
   5  -1  -4 569.578  19.242   3
  -5  -1   4 583.915  19.027   1
   5  -1  -4 593.477  17.885   1
   5   1  -4 577.931  18.305   1
   5   1  -4 580.159  16.277   3
  -5   1   4 582.975  18.522   2
  -4  -1   4 231.293  11.235   2
  -4  -1   4 222.539   9.744   1
   4  -1  -4 224.746  10.059   3
   4  -1  -4 252.786   8.806   1
   4   1  -4 248.494   9.910   1
   4   1  -4 230.173   8.180   3
  -4   1   4 228.554   9.560   2
   3  -1  -4 168.818   8.207   3
  -3  -1   4 170.424   8.072   1
  -3  -1   4 194.900   9.296   2
   3   1  -4 184.834   7.070   3
  -3   1   4 181.206   7.892   2
   2  -1  -4 1929.19   50.69   3
  -2  -1   4 2081.92   50.19   1
  -2  -1   4 2065.18   50.62   2
   2   1  -4 2023.36   49.35   3
  -2   1   4 2085.19   50.31   2
  -1  -1   4 2383.89   57.22   1
  -1  -1   4 2329.68   56.58   2
   1  -1  -4 2336.91   57.79   3
  -1   1   4 2334.75   57.53   2
   1   1  -4 2421.88   57.18   3
   0  -1  -4 15.5154  2.9714   3
   0  -1   4 22.3210  2.9481   2
   0  -1   4 22.6941  3.4021   1
   0  -1  -4 20.5080  3.3868   2
   0   1  -4 30.0841  3.9920   3
  -1  -1  -4 1896.82   46.39   3
  -1  -1  -4 1892.35   47.11   2
   1  -1   4 1832.33   46.60   1
   1   1   4 1829.20   45.11   1
  -1   1  -4 1840.86   47.02   3
  -2  -1  -4 1543.92   40.77   2
   2  -1   4 1562.47   40.87   1
  -2  -1  -4 1589.30   39.73   3
   2   1   4 1534.20   40.02   1
  -2   1  -4 1571.02   41.21   3
  -3  -1  -4 496.681  16.936   2
   3  -1   4 489.952  17.448   1
  -3  -1  -4 504.712  15.718   3
  -3   1  -4 486.004  17.238   3
   3   1   4 490.324  17.332   1
  -4  -1  -4 116.351   6.509   3
  -4  -1  -4 107.138   7.103   2
   4  -1   4 107.011   7.724   1
  -4   1  -4 100.717   4.873   2
  -4   1  -4 110.980   7.815   3
   4   1   4 121.684   9.937   1
  -5  -1  -4 16.0088  3.7003   3
   5  -1   4 23.3252  4.9811   1
  -5  -1  -4 31.7098  5.1997   2
   5   1   4 21.7670  5.0797   1
  -5   1  -4 22.9477  3.0081   2
  -5   1  -4 22.2259  4.9369   3
  -6  -1  -4 47.2247  6.2984   2
  -6  -1  -4 54.7067  5.7064   3
   6  -1   4 52.8249  7.4315   1
   6   1   4 55.0327  7.9826   1
  -6   1  -4 55.7337  4.9336   2
  -6   1  -4 52.1853  7.3293   3
  -7  -1  -4 -1.2726  3.2646   3
  -7  -1  -4 1.79117 2.86803   2
   7  -1   4 0.29498 2.99039   1
  -7   1  -4 -1.2013  1.9596   2
  -7   1  -4 5.57970 4.67774   3
   7   1   4 6.57729 4.12324   1
  -8  -1  -4 139.673   8.362   3
  -8  -1  -4 127.694   9.853   2
   8  -1   4 148.827  13.886   1
  -8   1  -4 139.084   7.907   2
   8   1   4 113.849  12.320   1
  -8   1  -4 139.140  10.260   3
  -9  -1  -4 51.5208  6.8492   3
  -9  -1  -4 50.3965  8.0224   2
   9  -1   4 35.2086  7.9053   1
  -9   1  -4 50.1126  6.1108   2
   9   1   4 50.1751  9.1858   1
  -9   1  -4 49.9602  8.1668   3
 -10  -1  -4 661.767  25.617   2
  10  -1   4 677.503  29.149   1
 -10  -1  -4 629.859  22.056   3
 -10   1  -4 642.912  22.249   2
 -10   1  -4 628.420  25.155   3
  10   1   4 649.864  29.044   1
 -11  -1  -4 13.7490  5.6782   2
  11  -1   4 23.6587  7.3809   1
 -11  -1  -4 14.7907  5.0128   3
 -11   1  -4 2.10916 4.98656   3
 -11   1  -4 19.3346  5.1359   2
  11   1   4 -0.6046  4.7382   1
 -12  -1  -4 437.257  21.512   2
  12  -1   4 410.909  24.379   1
 -12  -1  -4 473.693  19.159   3
 -12   1  -4 438.511  18.876   2
  12   1   4 491.253  26.263   1
 -12   1  -4 459.403  21.911   3
  13  -1   4 26.9225  8.9580   1
 -13  -1  -4 31.3657  6.7884   3
 -13  -1  -4 18.0451  6.9032   2
 -13   1  -4 28.7350  6.3943   2
 -13   1  -4 19.8165  7.0703   3
  13   1   4 40.8300 11.1899   1
 -14  -1  -4 279.789  15.531   3
  14  -1   4 291.764  21.726   1
 -14  -1  -4 339.093  19.662   2
  14   1   4 320.685  22.930   1
 -14   1  -4 318.810  19.674   3
 -14   1  -4 323.667  16.980   2
 -15  -1  -4 -2.4764  4.8902   2
  15  -1   4 -0.3377  6.3927   1
  15   1   4 13.1271  8.8153   1
 -15   1  -4 24.2361  9.0167   3
 -16  -1  -4 127.481  15.734   2
  16  -1   4 84.6911 15.4686   1
  16   1   4 64.1704 13.9781   1
 -16   1  -4 115.771  14.969   3
  17  -1   4 3.49091 7.48277   1
 -17  -1  -4 -15.191   5.548   2
  17   1   4 4.37051 8.02224   1
 -17   1  -4 -7.3562  7.1475   3
 -18  -1  -4 100.477  15.520   2
  18  -1   4 72.5956 14.9926   1
  18   1   4 78.2765 15.2866   1
  19  -1   4 -6.4843  6.4113   1
  19   1   4 2.29471 9.35532   1
  20  -1   4 39.6930 12.6193   1
  20   1   4 11.9464 10.3154   1
  21  -1   4 0.47498 7.90434   1
  21   1   4 0.94570 9.08559   1
  22  -1   4 4.12144 8.85087   1
  22   1   4 4.62466 9.90032   1
  23  -1   4 -2.5709 10.6067   1
  23   1   4 -0.8076  9.3641   1
  24  -1   4  4.2084 11.0923   1
  24   1   4  5.0959 10.4575   1
  25  -1   4  9.5421 11.7957   1
  25   1   4 12.5317 12.9798   1
  27  -2  -4  5.6173 10.4587   1
  27   2  -4 13.3298 14.0254   1
  26  -2  -4 25.5886 14.3132   1
 -26  -2   4  6.6539 13.1595   2
  26   2  -4 -1.6641 10.9765   1
 -25  -2   4  4.9120 12.1469   2
  25  -2  -4 -9.2372 10.2776   1
  25   2  -4  7.7717 10.8479   1
  24  -2  -4 15.9197 10.3036   1
 -24  -2   4 44.1286 15.2129   2
  24   2  -4 21.9080 11.8261   1
  23  -2  -4 18.9102 11.2706   1
 -23  -2   4 10.4562  9.6307   2
  23   2  -4 -8.1582  9.7930   1
 -22  -2   4 30.3322 12.0621   2
  22  -2  -4 14.0848 10.1968   1
  22   2  -4 65.1608 15.8532   1
  21  -2  -4 21.3015 11.7165   1
 -21  -2   4 -5.5726  8.7086   2
  21   2  -4 -3.5535 10.1802   1
  20  -2  -4 65.8484 13.8823   1
 -20  -2   4 83.1692 16.3140   2
 -20   2   4 86.0431 14.6791   3
  20   2  -4 91.3058 16.4951   1
 -19  -2   4 35.5296 11.1175   2
  19  -2  -4 40.0265 11.4956   1
 -19   2   4 43.3879 10.2442   3
 -19   2   4 59.1213 11.8642   2
  19   2  -4 51.7935 13.4559   1
  18  -2  -4 220.148  22.693   1
 -18  -2   4 246.251  24.189   2
 -18   2   4 221.256  21.086   3
 -18   2   4 234.369  20.428   2
  18   2  -4 220.303  23.518   1
  17  -2  -4 7.16880 7.06853   1
 -17  -2   4 22.2243  9.9313   2
  17   2  -4 13.7169  8.0583   1
 -17   2   4 37.6243  9.7525   3
 -17   2   4 38.8636 10.3169   2
 -16  -2   4 289.119  20.812   2
  16  -2  -4 296.412  21.707   1
 -16   2   4 290.656  19.038   2
 -16   2   4 287.127  19.925   3
  16   2  -4 334.608  22.504   1
 -15  -2   4 -8.9747  5.0724   2
  15  -2  -4 0.65663 5.18716   1
 -15   2   4 8.08620 7.27306   2
  15   2  -4 -3.0758  5.7412   1
  14  -2  -4 156.305  16.697   1
 -14  -2   4 181.756  18.774   2
 -14   2   4 214.312  15.150   2
  14   2  -4 185.073  17.821   1
 -13  -2   4 101.575  13.383   2
  13  -2  -4 92.7954 12.5050   1
 -13   2   4 94.8629 11.5791   2
  13   2  -4 118.955  13.552   1
  12  -2  -4 79.0251 10.8155   1
 -12  -2   4 86.8545 12.8931   2
 -12   2   4 67.7450  9.5053   2
  12   2  -4 69.2118 10.3409   1
 -11  -2   4 36.6819  8.3318   2
  11  -2  -4 15.5272  5.7314   1
  11   2  -4 21.8604  6.1151   1
 -11   2   4 25.8431  6.6795   2
  10  -2  -4 222.361  13.694   1
 -10  -2   4 296.386  17.594   2
 -10   2   4 250.215  13.432   2
  10   2  -4 246.232  14.744   1
   9  -2  -4 406.073  17.633   1
  -9  -2   4 369.956  19.256   2
   9   2  -4 378.319  17.482   1
  -9   2   4 377.313  16.077   2
   8  -2  -4 436.093  19.119   3
   8  -2  -4 439.133  17.434   1
  -8  -2   4 423.230  20.160   2
   8   2  -4 389.016  17.266   1
  -8   2   4 443.242  16.813   2
  -7  -2   4 -4.3120  3.3814   2
   7  -2  -4 -3.5199  2.8557   3
   7  -2  -4 -4.7018  2.1018   1
  -7   2   4 2.66615 2.65387   2
   7   2  -4 -1.0530  2.2763   1
   6  -2  -4 119.446   8.728   3
  -6  -2   4 126.985  11.316   2
  -6  -2   4 111.171   8.295   1
   6  -2  -4 111.500   6.959   1
   6   2  -4 102.838   4.640   3
   6   2  -4 109.537   8.085   1
  -6   2   4 100.967   6.937   2
  -5  -2   4 516.130  20.177   2
   5  -2  -4 511.705  16.272   1
  -5  -2   4 483.308  18.554   1
   5  -2  -4 530.249  19.622   3
  -5   2   4 523.208  17.258   2
   5   2  -4 528.695  14.307   3
   5   2  -4 467.065  18.179   1
  -4  -2   4 1575.00   42.97   2
   4  -2  -4 1521.94   37.96   1
  -4  -2   4 1547.62   41.89   1
   4  -2  -4 1479.71   42.32   3
   4   2  -4 1490.36   37.35   3
  -4   2   4 1528.71   39.97   2
  -3  -2   4 31.6563  5.0419   1
  -3  -2   4 43.3427  5.9215   2
   3  -2  -4 36.5123  5.1279   3
  -3   2   4 33.0146  4.0996   2
   3   2  -4 40.2357  4.0584   3
   2  -2  -4 55.0409  6.0454   3
  -2  -2   4 61.5516  6.5024   2
   2  -2  -4 43.9351  3.8755   1
  -2  -2   4 62.4762  6.4458   1
   2   2  -4 67.6883  5.1352   3
  -2   2   4 60.4778  5.5657   2
   1  -2  -4 594.782  19.459   3
  -1  -2   4 625.310  18.971   2
   1  -2  -4 619.439  16.974   1
  -1  -2   4 626.664  20.517   1
   1  -2  -4 628.613  19.757   2
   1   2  -4 579.917  18.530   3
   0  -2  -4 239.184  10.478   2
   0  -2  -4 216.695   8.422   1
   0  -2  -4 229.350   9.752   3
   0  -2   4 232.259   8.995   2
   0  -2   4 219.945  10.623   1
   0   2  -4 216.164  10.050   3
   0   2   4 216.141   8.068   1
  -1  -2  -4 81.8566  5.4538   3
  -1  -2  -4 81.9997  6.3049   2
   1  -2   4 93.2581  8.0282   1
  -1   2  -4 91.1316  7.7940   3
   1   2   4 83.4911  4.9407   1
  -2  -2  -4 26.7562  4.7766   2
  -2  -2  -4 26.9427  3.8282   3
   2  -2   4 21.6836  4.8167   1
   2   2   4 26.5297  3.8639   1
  -2   2  -4 21.2639  4.4838   3
  -3  -2  -4 488.436  18.315   2
  -3  -2  -4 491.912  15.699   3
   3  -2   4 474.099  18.217   1
   3   2   4 507.676  16.876   1
  -3   2  -4 468.610  18.306   3
  -4  -2  -4 921.022  29.332   2
  -4  -2  -4 953.906  25.977   3
   4  -2   4 909.864  29.460   1
   4   2   4 913.420  28.113   1
  -4   2  -4 928.572  29.889   3
   5  -2   4 610.264  23.094   1
  -5  -2  -4 628.820  23.000   2
  -5  -2  -4 640.153  19.136   3
  -5   2  -4 634.632  23.397   3
   5   2   4 608.692  22.118   1
  -6  -2  -4 1185.06   37.73   2
   6  -2   4 1240.41   38.70   1
  -6  -2  -4 1246.70   32.98   3
  -6   2  -4 1251.56   38.66   3
   6   2   4 1178.51   37.51   1
  -7  -2  -4 154.485  10.956   2
  -7  -2  -4 158.726   8.058   3
   7  -2   4 153.561  11.382   1
  -7   2  -4 145.295  11.082   3
  -7   2  -4 150.770   6.232   2
   7   2   4 161.636  11.882   1
  -8  -2  -4 459.521  15.747   3
  -8  -2  -4 468.748  20.469   2
   8  -2   4 462.025  21.349   1
   8   2   4 430.422  21.005   1
  -8   2  -4 434.092  13.879   2
  -8   2  -4 446.555  20.852   3
  -9  -2  -4 54.8044  6.0633   3
  -9  -2  -4 50.7662  8.3205   2
   9  -2   4 40.4493  7.9165   1
  -9   2  -4 54.9294  9.0571   3
  -9   2  -4 65.0075  5.7640   2
   9   2   4 73.3838 10.7159   1
 -10  -2  -4 146.462  14.242   2
  10  -2   4 147.386  15.345   1
 -10  -2  -4 129.803   8.111   3
  10   2   4 141.708  15.115   1
 -10   2  -4 137.357   7.855   2
 -10   2  -4 134.109  13.788   3
  11  -2   4 -0.7870  4.7302   1
 -11  -2  -4 2.58430 4.16136   2
 -11  -2  -4 -0.4483  3.4927   3
 -11   2  -4 0.52452 2.97060   2
  11   2   4 4.13840 6.13476   1
 -11   2  -4 -2.1511  4.2875   3
 -12  -2  -4 -4.4160  3.4168   3
  12  -2   4 1.04371 5.44387   1
 -12  -2  -4 1.51623 5.32659   2
 -12   2  -4 4.30513 7.24573   3
  12   2   4 5.39034 5.70282   1
 -13  -2  -4 6.61993 5.03533   2
  13  -2   4 2.84354 5.44749   1
 -13   2  -4 -11.752   5.037   3
  13   2   4 5.27174 6.52877   1
  14  -2   4 7.03336 7.18884   1
 -14  -2  -4 -0.0089  5.0451   2
 -14   2  -4 -0.5443  5.7995   3
  14   2   4 -0.8472  6.0658   1
  15  -2   4 36.9034 10.9273   1
 -15  -2  -4 20.7469  7.8440   2
  15   2   4 56.0909 13.0472   1
 -15   2  -4 26.2307  8.9219   3
 -16  -2  -4 30.3163  9.6635   2
  16  -2   4 31.3808 10.7739   1
 -16   2  -4 22.7563  9.3399   3
  16   2   4 15.8781  9.7557   1
 -17  -2  -4 43.8134 11.6254   2
  17  -2   4 21.2879 10.7253   1
 -17   2  -4 40.1968 11.8138   3
  17   2   4 29.4542 11.8594   1
 -18  -2  -4 11.4304  8.9084   2
  18  -2   4 14.9290  9.1545   1
  18   2   4 9.38236 9.99481   1
 -18   2  -4 12.3189 10.5107   3
  19  -2   4 -4.5566  8.0363   1
 -19  -2  -4 9.66030 9.42256   2
 -19   2  -4 9.63170 8.27746   3
  19   2   4 -2.3025  8.6953   1
  20  -2   4 23.5077 11.1781   1
 -20  -2  -4 43.2171 13.8339   2
  20   2   4 24.5105 11.2194   1
  21  -2   4 16.1440 10.4507   1
  21   2   4 8.94086 9.91982   1
  22  -2   4 32.4212 13.0238   1
  22   2   4  4.2640 10.9609   1
  23  -2   4 3.35115 8.79036   1
  23   2   4 -1.8590 10.3534   1
  24  -2   4 20.8656 13.4883   1
  24   2   4  5.0985 12.1553   1
  25  -2   4 -8.7568  9.4665   1
  25   2   4  3.3255 13.0704   1
  27  -3  -4  7.4256 12.7542   1
 -27  -3   4  0.8224 11.0081   2
  27   3  -4 -5.5135 11.5672   1
  26  -3  -4  7.8550 10.4022   1
 -26  -3   4  4.7919 10.6569   2
  26   3  -4 -6.9270 12.4611   1
 -25  -3   4 10.2877 12.0735   2
  25  -3  -4 6.24539 9.33434   1
  25   3  -4 -9.8267 10.3126   1
  24  -3  -4 19.3752 10.9403   1
 -24  -3   4 0.06612 9.23941   2
  24   3  -4 -5.3319 11.6314   1
 -23  -3   4  9.7177 11.5002   2
  23  -3  -4 12.1439 12.0092   1
  23   3  -4 5.97865 9.65287   1
  22  -3  -4 0.15814 8.99078   1
 -22  -3   4 4.23980 9.25389   2
  22   3  -4 -5.2517  7.9984   1
 -21  -3   4  4.2403 10.7134   2
  21  -3  -4 4.85162 8.15043   1
 -21   3   4 1.98474 7.18768   3
  21   3  -4 -0.6730  8.3267   1
 -20  -3   4 5.74284 7.69736   2
  20  -3  -4 1.04056 6.15441   1
 -20   3   4 3.94996 7.66908   3
  20   3  -4 5.54535 8.37053   1
  19  -3  -4 -5.2505  5.7556   1
 -19  -3   4 7.75850 8.03301   2
 -19   3   4 -1.3641  7.5742   3
  19   3  -4 0.20728 8.17369   1
  18  -3  -4 5.28958 7.61695   1
 -18  -3   4 24.8546  9.9421   2
  18   3  -4 6.55891 7.85233   1
 -18   3   4 -3.9370  6.0538   3
 -17  -3   4 3.52607 6.85097   2
  17  -3  -4 -4.9002  4.5815   1
 -17   3   4 4.85107 6.43260   3
  17   3  -4 12.9832  8.6401   1
  16  -3  -4 61.9699 11.8500   1
 -16  -3   4 64.3796 14.0412   2
 -16   3   4 64.4489 11.4714   2
  16   3  -4 68.6259 13.5312   1
 -15  -3   4 17.8708  8.9857   2
  15  -3  -4 26.7713  8.0767   1
 -15   3   4 20.3858  7.9891   2
  15   3  -4 28.8961  9.7579   1
 -14  -3   4 184.385  19.188   2
  14  -3  -4 222.961  19.482   1
  14   3  -4 170.182  17.280   1
 -14   3   4 195.238  14.878   2
  13  -3  -4 183.077  17.385   1
 -13  -3   4 209.233  19.571   2
 -13   3   4 199.638  13.801   2
  13   3  -4 206.588  15.474   1
  12  -3  -4 316.738  18.217   1
 -12  -3   4 368.767  21.548   2
  12   3  -4 387.673  20.359   1
 -12   3   4 366.559  17.785   2
 -11  -3   4 372.630  21.177   2
  11  -3  -4 386.174  18.810   1
 -11   3   4 363.040  17.107   2
  11   3  -4 363.120  18.997   1
 -10  -3   4 320.892  19.048   2
  10  -3  -4 358.979  17.107   1
 -10   3   4 348.521  15.567   2
  10   3  -4 319.514  17.426   1
   9  -3  -4 428.131  18.716   1
  -9  -3   4 421.812  21.434   2
  -9   3   4 448.035  17.478   2
   9   3  -4 425.896  19.456   1
  -8  -3   4 992.264  34.843   1
  -8  -3   4 1048.18   36.58   2
   8  -3  -4 1031.19   32.37   1
   8   3  -4 1026.03   33.93   1
  -8   3   4 1070.46   31.27   2
  -7  -3   4 489.072  21.851   2
   7  -3  -4 489.754  21.676   3
  -7  -3   4 479.453  21.084   1
   7  -3  -4 505.952  18.720   1
   7   3  -4 500.069  20.461   1
  -7   3   4 495.454  17.813   2
   6  -3  -4 1077.60   31.76   1
  -6  -3   4 1095.19   36.07   2
   6  -3  -4 1134.84   36.69   3
  -6  -3   4 1081.88   35.35   1
   6   3  -4 1053.11   34.69   1
   6   3  -4 1102.59   27.48   3
  -6   3   4 1155.84   31.97   2
   5  -3  -4 606.936  19.479   1
   5  -3  -4 558.876  22.589   3
  -5  -3   4 605.579  22.534   1
  -5  -3   4 547.394  22.134   2
   5   3  -4 608.368  16.446   3
  -5   3   4 551.290  19.029   2
   5   3  -4 551.915  21.949   1
  -4  -3   4 1066.69   34.03   1
   4  -3  -4 1052.63   30.14   1
  -4  -3   4 1123.44   34.01   2
   4  -3  -4 1053.64   34.10   3
   4   3  -4 1091.67   28.49   3
  -4   3   4 1068.11   30.77   2
  -3  -3   4 129.237   9.558   1
   3  -3  -4 122.206   8.974   3
   3  -3  -4 128.564   7.480   1
  -3  -3   4 137.695   8.952   2
  -3   3   4 135.749   7.996   2
   3   3  -4 126.331   7.018   3
  -2  -3   4 550.235  20.879   1
   2  -3  -4 516.735  17.325   1
   2  -3  -4 542.756  20.003   3
  -2  -3   4 530.060  18.795   2
   2   3  -4 543.788  17.803   3
   1  -3  -4 55.1850  5.7837   1
   1  -3  -4 61.5283  6.7286   2
   1  -3  -4 55.5399  6.6488   3
  -1  -3   4 52.9911  7.1496   1
  -1  -3   4 71.0296  6.6423   2
   1   3  -4 61.6607  6.6016   3
   0  -3   4 615.405  18.851   2
   0  -3  -4 620.732  21.439   2
   0  -3  -4 604.387  19.360   1
   0  -3   4 629.256  22.879   1
   0  -3  -4 597.139  20.672   3
   0   3  -4 595.463  20.846   3
   1  -3   4 54.9610  7.1728   1
  -1  -3  -4 47.9607  6.3527   2
  -1  -3  -4 55.2790  6.2523   3
   1  -3   4 57.0488  4.7952   2
  -1  -3  -4 53.1959  5.7727   1
  -1   3  -4 47.9665  6.5005   3
   1   3   4 39.4297  4.8902   1
   2  -3   4 298.751  14.624   1
   2  -3   4 288.299   9.350   2
  -2  -3  -4 276.013  14.029   2
  -2  -3  -4 296.632  12.148   3
  -2  -3  -4 286.859  12.522   1
   2   3   4 281.517  11.798   1
  -2   3  -4 284.192  13.954   3
   3  -3   4 21.7567  5.1511   1
  -3  -3  -4 29.2233  4.2054   3
  -3  -3  -4 16.3620  4.9729   2
  -3   3  -4 16.6945  4.9757   3
   3   3   4 15.2133  3.5767   1
  -4  -3  -4 -1.3456  1.7079   3
  -4  -3  -4 0.73530 3.15810   2
   4  -3   4 -3.3952  2.4739   1
   4   3   4 3.39139 2.92196   1
  -4   3  -4 -2.3095  2.8525   3
   5  -3   4 6.54420 3.93988   1
  -5  -3  -4 23.0090  5.5609   2
  -5  -3  -4 16.7612  3.4164   3
  -5   3  -4 15.6043  5.3148   3
   5   3   4 14.6504  4.6678   1
   6  -3   4 195.041  12.958   1
  -6  -3  -4 199.381   9.001   3
  -6  -3  -4 187.075  13.020   2
   6   3   4 191.067  11.806   1
  -6   3  -4 191.660  13.087   3
   7  -3   4 136.004  13.249   1
  -7  -3  -4 104.036   6.423   3
  -7  -3  -4 93.9976 11.1286   2
   7   3   4 114.657  11.809   1
  -7   3  -4 96.1880 11.4677   3
  -8  -3  -4 292.812  11.533   3
  -8  -3  -4 272.178  16.402   2
   8  -3   4 278.306  16.801   1
  -8   3  -4 279.201  16.995   3
   8   3   4 295.418  16.486   1
  -9  -3  -4 326.303  12.661   3
  -9  -3  -4 363.218  19.566   2
   9  -3   4 328.849  19.039   1
  -9   3  -4 315.022  18.712   3
   9   3   4 322.015  18.813   1
 -10  -3  -4 208.969   9.904   3
  10  -3   4 207.061  18.690   1
 -10  -3  -4 183.571  16.732   2
  10   3   4 214.589  16.113   1
 -10   3  -4 228.232  16.210   3
  11  -3   4 170.637  17.387   1
 -11  -3  -4 165.958  16.319   2
 -11   3  -4 178.564  17.298   3
  11   3   4 169.443  17.270   1
  12  -3   4 230.440  20.919   1
 -12  -3  -4 225.563  20.395   2
  12   3   4 210.269  20.037   1
 -12   3  -4 209.319  19.193   3
  13  -3   4 150.367  17.926   1
 -13  -3  -4 162.808  17.665   2
  13   3   4 161.410  18.758   1
 -13   3  -4 139.133  17.217   3
  14  -3   4 194.265  20.697   1
 -14  -3  -4 164.094  18.366   2
  14   3   4 224.693  22.548   1
 -14   3  -4 195.725  20.746   3
  15  -3   4 34.2504 10.4602   1
 -15  -3  -4 67.3253 12.8359   2
  15   3   4 60.8631 13.5713   1
 -15   3  -4 48.6556 12.2437   3
 -16  -3  -4 137.139  18.246   2
  16  -3   4 86.5841 15.0251   1
 -16   3  -4 93.7832 16.3647   3
  16   3   4 107.480  17.468   1
  17  -3   4 21.4635  9.8786   1
 -17  -3  -4 48.8677 12.1931   2
  17   3   4 50.4831 14.7119   1
 -17   3  -4 46.3363 12.2118   3
  18  -3   4 38.5383 12.4007   1
 -18  -3  -4 27.0241 11.7266   2
  18   3   4 52.4520 14.6495   1
 -18   3  -4 54.4681 13.0571   3
  19  -3   4 32.5350 11.0005   1
 -19  -3  -4 19.1923 11.3851   2
 -19   3  -4  7.7907 11.0332   3
  19   3   4 18.2214 11.6704   1
 -20  -3  -4  6.4361 10.4157   2
  20  -3   4 0.34726 6.81802   1
 -20   3  -4 -7.3496  7.4873   3
  20   3   4 9.21333 9.76036   1
  21  -3   4 10.0607  9.7523   1
 -21  -3  -4 12.8227 10.9415   2
  21   3   4 -2.9774  9.3027   1
 -21   3  -4 -4.2057 10.3239   3
 -22  -3  -4 -2.5707 10.5497   2
  22  -3   4 -1.0451  9.4591   1
  22   3   4 -3.5520 10.8814   1
  23  -3   4  6.3851 10.7557   1
  23   3   4  2.9423 12.8799   1
  24  -3   4 -9.7862  7.9620   1
  24   3   4 12.5047 13.4702   1
  25  -3   4 -0.5194  9.8173   1
  25   3   4 -0.6773 11.7831   1
 -26  -4   4 -6.8530 10.9096   2
  26  -4  -4 -0.0086 11.9176   1
  26   4  -4 -8.5155 11.0702   1
 -25  -4   4 17.8078 12.9818   2
  25  -4  -4 13.9829 11.1306   1
  25   4  -4 -8.1932 10.5683   1
  24  -4  -4  1.0814 10.0848   1
 -24  -4   4 25.4351 13.5764   2
  24   4  -4  6.8202 11.6242   1
 -23  -4   4 31.7366 13.3416   2
  23  -4  -4 0.36094 7.91433   1
  23   4  -4 29.2524 15.6178   1
 -23   4   4 27.1352 12.0170   3
 -22  -4   4 28.2932 12.5907   2
  22  -4  -4 1.14273 8.51085   1
  22   4  -4 17.4604 14.1542   1
 -22   4   4 26.5319 11.3067   3
 -21  -4   4 49.7109 13.2786   2
  21  -4  -4 36.3688 13.0895   1
  21   4  -4 37.1486 14.1873   1
 -21   4   4 36.5143 12.5671   3
 -20  -4   4 3.56157 8.66445   2
  20  -4  -4 19.4212  9.7730   1
  20   4  -4 22.1879 11.1633   1
 -20   4   4 35.9902 11.8616   3
 -19  -4   4 39.6028 12.0605   2
  19  -4  -4 57.2904 13.5261   1
  19   4  -4 86.9864 16.9302   1
 -19   4   4 57.8292 14.7009   3
  18  -4  -4 38.0577 10.6486   1
 -18  -4   4 34.2017 12.8746   2
 -18   4   4 43.9729 12.0500   3
  18   4  -4 44.7664 12.7684   1
 -17  -4   4 89.0085 15.9510   2
  17  -4  -4 77.0385 13.8422   1
 -17   4   4 99.3123 16.2466   3
  17   4  -4 86.3723 14.8745   1
  16  -4  -4 66.3645 12.1084   1
 -16  -4   4 34.1765 11.3436   2
  16   4  -4 35.4810 10.5523   1
 -16   4   4 79.4551 14.1481   3
 -15  -4   4 164.699  19.388   2
  15  -4  -4 158.404  17.099   1
  15   4  -4 141.619  16.691   1
 -14  -4   4 19.1101  8.8296   2
  14  -4  -4 36.5825  8.6715   1
 -14   4   4 37.5562  8.7389   2
  14   4  -4 34.4822  9.1512   1
 -13  -4   4 74.0189 12.2222   2
  13  -4  -4 72.2647 11.5788   1
 -13   4   4 92.3950 10.4828   2
  13   4  -4 74.8260 12.0021   1
  12  -4  -4 8.13641 4.90234   1
 -12  -4   4 0.82064 5.39774   2
 -12   4   4 0.33768 5.02380   2
  12   4  -4 9.93930 5.55212   1
  11  -4  -4 18.3048  6.3435   1
 -11  -4   4 11.2770  6.2830   2
  11   4  -4 2.82519 4.46354   1
 -11   4   4 18.0035  5.6806   2
 -10  -4   4 91.1566 12.8618   2
  10  -4  -4 104.390  11.664   1
  10   4  -4 112.511  12.758   1
 -10   4   4 110.490  10.115   2
  -9  -4   4 -7.3174  3.1441   1
   9  -4  -4 -5.4997  2.5839   1
  -9  -4   4 -0.4522  4.3437   2
  -9   4   4 -2.0402  3.2015   2
   9   4  -4 2.04080 3.98504   1
  -8  -4   4 0.45678 4.61243   2
   8  -4  -4 10.4967  4.4008   1
  -8  -4   4 8.49061 5.03366   1
   8   4  -4 8.24313 4.58481   1
  -8   4   4 -0.9765  3.2747   2
  -7  -4   4 24.2452  6.5325   2
   7  -4  -4 14.8623  4.5210   1
  -7  -4   4 18.1560  5.9525   1
   7   4  -4 14.3524  2.3934   3
  -7   4   4 13.8867  4.0001   2
   7   4  -4 11.3992  4.8739   1
   6  -4  -4 47.9261  7.0783   1
  -6  -4   4 33.6295  7.4763   2
  -6  -4   4 49.5707  8.0687   1
   6   4  -4 42.5020  4.3372   3
  -6   4   4 38.8612  5.7593   2
  -5  -4   4 387.622  18.838   1
   5  -4  -4 365.708  15.910   1
   5  -4  -4 376.322  19.003   3
  -5  -4   4 370.883  18.079   2
   5   4  -4 364.984  12.984   3
  -5   4   4 393.970  15.465   2
  -4  -4   4 282.011  16.236   1
   4  -4  -4 307.655  14.288   1
   4  -4  -4 302.081  16.375   3
  -4  -4   4 309.665  15.570   2
  -4   4   4 299.034  13.586   2
   4   4  -4 343.362  12.770   3
   3  -4  -4 1090.27   32.48   1
   3  -4  -4 1066.20   35.67   3
  -3  -4   4 1102.02   34.33   2
  -3  -4   4 1067.72   36.27   1
  -3   4   4 1038.75   32.47   2
   3   4  -4 1103.70   31.33   3
  -2  -4   4 686.229  27.091   1
   2  -4  -4 741.961  24.994   2
  -2  -4   4 719.840  24.640   2
   2  -4  -4 743.117  24.229   1
   2  -4  -4 724.276  26.584   3
   2   4  -4 709.767  23.762   3
   1  -4  -4 1057.44   34.30   3
  -1  -4   4 1089.21   32.28   2
   1  -4  -4 1076.84   33.70   2
   1  -4  -4 1076.01   32.54   1
  -1  -4   4 1103.26   36.35   1
   1   4  -4 1119.44   33.45   3
   0  -4  -4 103.339   9.826   2
   0  -4  -4 120.637   8.944   3
   0  -4   4 100.383   7.006   2
   0  -4   4 108.357  11.145   1
   0  -4  -4 110.457   8.178   1
   0   4  -4 96.4840  9.4544   3
   1  -4   4 999.094  27.588   2
  -1  -4  -4 944.970  30.329   3
  -1  -4  -4 951.090  30.054   1
  -1  -4  -4 984.452  32.280   2
   1  -4   4 974.539  33.702   1
   1   4   4 927.864  29.609   1
  -1   4  -4 988.796  32.088   3
  -2  -4  -4 105.065   7.839   3
  -2  -4  -4 115.352  10.179   1
   2  -4   4 102.141   5.876   2
   2  -4   4 123.557  11.916   1
  -2  -4  -4 104.954  10.665   2
  -2   4  -4 104.340  10.719   3
   2   4   4 109.244   9.551   1
   3  -4   4 1445.31   35.95   2
  -3  -4  -4 1450.37   40.72   3
  -3  -4  -4 1484.05   42.85   1
  -3  -4  -4 1475.62   45.02   2
   3  -4   4 1411.09   45.13   1
  -3   4  -4 1425.05   44.94   3
   3   4   4 1468.41   41.57   1
  -4  -4  -4 411.952  15.806   3
  -4  -4  -4 408.106  19.694   2
   4  -4   4 399.976  19.696   1
  -4   4  -4 410.669  19.951   3
   4   4   4 427.565  17.561   1
  -5  -4  -4 983.428  28.949   3
  -5  -4  -4 983.090  34.643   2
   5  -4   4 928.480  34.056   1
   5   4   4 989.256  31.928   1
  -5   4  -4 959.159  35.226   3
  -6  -4  -4 211.785  10.343   3
  -6  -4  -4 224.119  15.125   2
   6  -4   4 227.061  14.804   1
  -6   4  -4 193.638  14.415   3
   6   4   4 215.466  12.897   1
  -7  -4  -4 534.707  18.062   3
   7  -4   4 531.616  24.515   1
  -7  -4  -4 510.215  24.305   2
  -7   4  -4 564.063  25.802   3
   7   4   4 534.394  23.098   1
  -8  -4  -4 29.2697  7.8775   2
  -8  -4  -4 36.2230  4.8004   3
   8  -4   4 24.8861  6.9308   1
  -8   4  -4 34.3298  8.2063   3
   8   4   4 30.4116  6.9762   1
   9  -4   4 70.3687 11.1483   1
  -9  -4  -4 58.7159 10.2447   2
   9   4   4 72.1538 10.7337   1
  -9   4  -4 62.1412 10.9576   3
 -10  -4  -4 95.4362 13.1976   2
  10  -4   4 60.2992 10.7038   1
 -10   4  -4 89.4076 13.5299   3
  10   4   4 74.0188 11.1022   1
  11  -4   4 42.9217  9.8842   1
 -11  -4  -4 41.3914  9.1488   2
  11   4   4 39.0149  9.0799   1
 -11   4  -4 38.5444 10.3054   3
 -12  -4  -4 47.9321 10.6503   2
  12  -4   4 66.3319 12.0928   1
 -12   4  -4 30.9894 10.2896   3
  12   4   4 44.7438 10.2988   1
  13  -4   4 -3.8785  5.1395   1
 -13  -4  -4 0.46049 5.45619   2
  13   4   4 0.98906 7.04703   1
 -13   4  -4 9.82085 8.17969   3
  14  -4   4 2.42053 6.25542   1
 -14  -4  -4 16.5773  7.5991   2
  14   4   4 12.7696  8.8876   1
 -14   4  -4 15.6454  8.3971   3
 -15  -4  -4 12.5341  8.5505   2
  15  -4   4 16.3628  8.4452   1
  15   4   4 15.6945 10.2298   1
 -15   4  -4 24.9537 10.7210   3
 -16  -4  -4 10.5026  8.3017   2
  16  -4   4 5.38134 7.63378   1
 -16   4  -4 6.98957 8.60065   3
  16   4   4 -3.3231  7.5828   1
 -17  -4  -4 6.90455 9.70502   2
  17  -4   4 29.4037 11.6786   1
  17   4   4 4.95607 9.28140   1
 -17   4  -4 13.6256 11.4064   3
 -18  -4  -4 20.8123 10.4401   2
  18  -4   4 14.4564  9.9978   1
 -18   4  -4  8.7322 11.3088   3
  18   4   4 22.4304 12.5855   1
 -19  -4  -4 21.1652 11.4895   2
  19  -4   4 20.5340 10.9383   1
 -19   4  -4 30.6685 12.4578   3
  19   4   4 40.7677 14.1858   1
 -20  -4  -4 -0.7693 10.8853   2
  20  -4   4 -5.5166  9.1237   1
  20   4   4 12.1252 11.6319   1
 -20   4  -4  3.5132 11.2075   3
  21  -4   4 -1.6508  8.9756   1
 -21  -4  -4  7.8219 10.8587   2
  21   4   4 -0.0920 11.5722   1
 -21   4  -4 -8.1841  9.2641   3
  22  -4   4 5.42928 9.98081   1
 -22  -4  -4 10.4723 10.6660   2
  22   4   4 -6.2316 10.5025   1
 -22   4  -4 -6.8614 11.5375   3
 -23  -4  -4  1.9883 13.2388   2
  23  -4   4  2.9100 11.5462   1
  23   4   4 12.9211 12.6582   1
 -24  -4  -4 16.6712 13.3495   2
  24  -4   4  8.5246 12.2686   1
  24   4   4 -0.3974 12.0864   1
 -25  -5   4 -6.6663  8.9200   2
  25  -5  -4 -6.2287  8.9840   1
  25   5  -4 17.0350 13.8586   1
 -24  -5   4 -2.1330  9.9644   2
  24  -5  -4 -3.0124  8.7995   1
 -24   5   4  9.7820 10.1037   3
  24   5  -4  0.6738 11.2664   1
  23  -5  -4 -1.4335  8.6023   1
 -23  -5   4 26.7290 13.7248   2
 -23   5   4 -1.3725  9.8922   3
  23   5  -4 -6.7387 10.1358   1
 -22  -5   4 14.6708 13.3091   2
  22  -5  -4 1.73277 9.13022   1
 -22   5   4  5.6094 10.3169   3
  22   5  -4  1.1959 10.1251   1
 -21  -5   4 -5.6703  8.8983   2
  21  -5  -4 -7.8109  6.6525   1
  21   5  -4 -4.2942  8.5622   1
 -21   5   4 6.39224 8.61793   3
  20  -5  -4 9.94971 8.70848   1
 -20  -5   4 -7.6701  7.3729   2
 -20   5   4 3.72380 7.60031   3
  20   5  -4 6.16977 8.49647   1
 -19  -5   4 -2.7793  9.1138   2
  19  -5  -4 7.57129 7.23706   1
  19   5  -4 -5.1860  6.9116   1
 -19   5   4 1.49489 8.78729   3
  18  -5  -4 -1.2908  6.1614   1
 -18  -5   4 2.81597 8.01481   2
 -18   5   4 0.20667 6.74045   3
  18   5  -4 5.41402 7.70113   1
  17  -5  -4 2.39746 6.74341   1
 -17  -5   4 -7.8492  6.6080   2
 -17   5   4 12.1316  9.6438   3
  17   5  -4 18.5772  9.1154   1
 -16  -5   4 5.76071 8.71311   2
  16  -5  -4 2.21961 5.99078   1
 -16   5   4 -1.9740  6.3641   3
  16   5  -4 -2.0900  5.5234   1
 -15  -5   4 78.7139 15.9256   2
  15  -5  -4 92.8600 13.9195   1
  15   5  -4 98.9123 14.3213   1
 -14  -5   4 7.87311 7.82913   2
  14  -5  -4 0.44673 5.26214   1
  14   5  -4 2.81287 5.47639   1
 -13  -5   4 135.337  17.491   2
  13  -5  -4 152.204  16.025   1
  13   5  -4 153.210  16.864   1
 -12  -5   4 37.1104  9.9626   2
  12  -5  -4 36.1936  8.7536   1
  12   5  -4 18.5610  7.1851   1
 -12   5   4 44.2694  8.2300   2
 -11  -5   4 640.754  31.464   2
  11  -5  -4 642.280  27.836   1
 -11   5   4 694.491  24.807   2
  11   5  -4 633.291  29.419   1
  10  -5  -4 19.8250  5.7460   1
 -10  -5   4 28.4481  8.3959   1
 -10  -5   4 11.1713  6.4616   2
 -10   5   4 14.6406  4.9930   2
  10   5  -4 16.3407  6.1161   1
   9  -5  -4 477.889  22.149   1
  -9  -5   4 493.448  25.772   2
  -9  -5   4 518.893  25.772   1
   9   5  -4 512.092  24.552   1
  -9   5   4 517.089  19.872   2
  -8  -5   4 23.2901  7.2009   1
  -8  -5   4 15.1918  6.1034   2
   8  -5  -4 27.0504  6.9621   1
   8   5  -4 34.1633  7.9359   1
  -8   5   4 35.9077  6.0047   2
   7  -5  -4 625.043  25.211   1
  -7  -5   4 609.228  27.390   2
  -7  -5   4 643.928  28.201   1
   7   5  -4 650.484  27.907   1
   7   5  -4 650.806  18.599   3
  -7   5   4 634.193  22.565   2
   6  -5  -4 36.9453  6.9188   1
  -6  -5   4 14.8682  5.6744   1
  -6  -5   4 24.0081  6.5257   2
  -6   5   4 37.9987  6.0875   2
   6   5  -4 31.9898  4.8016   3
   6   5  -4 32.1806  7.8243   1
  -5  -5   4 548.855  25.073   1
  -5  -5   4 537.597  23.642   2
   5  -5  -4 563.085  22.587   1
  -5   5   4 534.449  20.382   2
   5   5  -4 533.574  18.538   3
   4  -5  -4 51.8466  7.8493   1
  -4  -5   4 48.1175  7.9587   2
  -4  -5   4 56.7589  9.5408   1
  -4   5   4 50.6452  6.9781   2
   4   5  -4 57.1397  7.1548   3
  -3  -5   4 434.710  19.847   2
   3  -5  -4 437.859  21.341   3
   3  -5  -4 450.226  19.534   1
  -3  -5   4 487.204  23.065   1
   3   5  -4 461.851  18.368   3
   2  -5  -4 349.861  16.527   2
  -2  -5   4 367.564  16.854   2
   2  -5  -4 331.137  17.904   3
   2  -5  -4 321.938  16.292   1
  -2  -5   4 386.522  19.989   1
   2   5  -4 362.707  16.369   3
  -1  -5   4 77.5483  8.4012   2
  -1  -5   4 68.5452 10.2307   1
   1  -5  -4 64.2372  9.0205   2
   1  -5  -4 65.6694  9.3558   3
   1  -5  -4 87.7927  9.6245   1
   1   5  -4 60.4284  8.2316   3
   0  -5  -4 345.783  17.190   3
   0  -5   4 336.668  18.816   1
   0  -5  -4 345.513  16.564   1
   0  -5  -4 332.587  16.728   2
   0  -5   4 308.466  14.366   2
   0   5  -4 322.897  16.561   3
  -1  -5  -4 121.618  11.311   1
  -1  -5  -4 117.484  11.321   3
  -1  -5  -4 115.621  11.427   2
   1  -5   4 99.7666  8.5814   2
   1  -5   4 93.6848 11.6526   1
  -1   5  -4 93.7686 10.7736   3
   1   5   4 107.994  10.585   1
  -2  -5  -4 126.098  11.822   1
  -2  -5  -4 126.654  11.399   3
  -2  -5  -4 121.320  12.321   2
   2  -5   4 105.219   6.893   2
   2  -5   4 98.0821 12.3447   1
  -2   5  -4 124.247  12.429   3
   2   5   4 105.727  10.547   1
   3  -5   4 18.0986  6.1387   1
  -3  -5  -4 13.0706  5.5403   2
  -3  -5  -4 13.0120  5.5082   1
   3  -5   4 15.1786  3.0899   2
  -3  -5  -4 20.8638  5.3777   3
  -3   5  -4 18.2594  5.9516   3
   3   5   4 25.0377  5.9061   1
  -4  -5  -4 20.7330  4.9544   3
  -4  -5  -4 12.0852  5.2962   2
  -4  -5  -4 15.8408  5.2971   1
   4  -5   4 24.8642  7.0955   1
  -4   5  -4 24.1699  6.7986   3
   4   5   4 28.8204  6.1371   1
  -5  -5  -4 216.496  11.696   3
   5  -5   4 221.843  15.823   1
  -5  -5  -4 257.456  16.454   2
  -5   5  -4 221.511  15.797   3
   5   5   4 209.574  13.202   1
  -6  -5  -4 179.098  16.551   2
   6  -5   4 179.804  17.123   1
  -6  -5  -4 182.349  10.218   3
  -6   5  -4 204.473  18.549   3
   6   5   4 170.426  12.361   1
  -7  -5  -4 132.692  14.754   2
   7  -5   4 129.021  14.393   1
  -7   5  -4 115.352  14.142   3
   7   5   4 106.505  11.805   1
   8  -5   4 57.4797 10.3198   1
  -8  -5  -4 68.1748 11.1823   2
  -8   5  -4 51.7916 10.6719   3
   8   5   4 36.3869  7.9168   1
  -9  -5  -4 203.881  19.560   2
   9  -5   4 226.713  20.535   1
   9   5   4 184.320  17.176   1
  -9   5  -4 198.113  19.515   3
  10  -5   4 50.1466 11.0991   1
 -10  -5  -4 21.1229  7.9708   2
 -10   5  -4 27.3171  9.3240   3
  10   5   4 44.1118  9.5214   1
 -11  -5  -4 89.6392 14.4162   2
  11  -5   4 97.0501 14.2397   1
 -11   5  -4 102.793  15.605   3
  11   5   4 113.559  14.850   1
 -12  -5  -4 16.0173  8.2202   2
  12  -5   4 6.57736 6.38981   1
  12   5   4 23.8568  7.8951   1
 -12   5  -4 9.50061 7.39111   3
  13  -5   4 85.6972 14.0206   1
 -13  -5  -4 76.5556 14.2621   2
 -13   5  -4 69.6842 12.9379   3
  13   5   4 100.954  15.327   1
 -14  -5  -4 34.5533 11.9829   2
  14  -5   4 15.9118  8.4494   1
  14   5   4 5.31839 7.84603   1
 -14   5  -4 13.3991 10.6414   3
 -15  -5  -4 49.4394 12.6066   2
  15  -5   4 69.1470 13.6188   1
  15   5   4 55.5522 14.4469   1
 -15   5  -4 64.3964 14.3199   3
 -16  -5  -4 48.8761 12.8342   2
  16  -5   4 27.8654 10.0938   1
  16   5   4 26.1089 12.2603   1
 -16   5  -4 36.0995 12.6250   3
 -17  -5  -4 42.8510 13.1519   2
  17  -5   4 32.3345 11.7965   1
  17   5   4 22.9014 11.4036   1
 -17   5  -4 32.4416 13.7044   3
 -18  -5  -4 0.26643 8.40543   2
  18  -5   4 2.35257 7.57286   1
 -18   5  -4 16.5499 11.0713   3
  18   5   4 7.85519 9.57312   1
  19  -5   4 17.5764 10.3335   1
 -19  -5  -4  6.9167 10.6396   2
 -19   5  -4 -0.3757 10.2662   3
  19   5   4  8.3257 11.7061   1
 -20  -5  -4  3.8586 11.5636   2
  20  -5   4 2.82214 8.69731   1
 -20   5  -4 -13.660  10.972   3
  20   5   4 -4.4051 11.1268   1
 -21  -5  -4 -0.4083 12.8801   2
  21  -5   4 2.89182 9.44577   1
  21   5   4 -4.3994 11.0700   1
 -21   5  -4 -0.1708 11.1896   3
 -22  -5  -4 -4.3486 12.2881   2
  22  -5   4 13.2855 11.6540   1
  22   5   4 -19.678  11.062   1
 -22   5  -4 -9.1609 11.8016   3
 -23  -5  -4  4.6096 14.0007   2
  23  -5   4  5.6071 12.1951   1
 -23   5  -4 -17.808   9.919   3
  23   5   4 10.5333 14.7555   1
 -24  -6   4 25.8232 14.1140   2
  24   6  -4 -8.5814 10.5040   1
 -24   6   4 19.9123 14.1046   3
 -23  -6   4 36.7706 15.8116   2
  23   6  -4 -5.2313 10.4118   1
 -23   6   4 27.8035 13.1885   3
  22  -6  -4 0.87213 8.78628   1
 -22  -6   4 -0.0076 11.3912   2
 -22   6   4  3.6129 10.8413   3
  22   6  -4 -10.073   9.103   1
  21  -6  -4 27.8420 10.8568   1
 -21  -6   4 36.8106 13.0565   2
  21   6  -4 55.8381 15.7381   1
 -21   6   4 45.5696 15.9326   3
  20  -6  -4 0.50864 6.74987   1
 -20  -6   4 7.16943 9.78722   2
 -20   6   4 11.2592  9.3522   3
  20   6  -4 -11.975   7.029   1
 -19  -6   4 84.4953 18.3665   2
  19  -6  -4 37.3211 10.5699   1
  19   6  -4 64.1464 15.3934   1
 -19   6   4 55.6125 14.6246   3
  18  -6  -4 5.06310 7.45802   1
 -18  -6   4 10.3365 10.9057   2
  18   6  -4 -0.1934  6.3517   1
 -18   6   4 -2.3933  9.5701   3
  17  -6  -4 85.6615 14.9257   1
 -17  -6   4 65.3142 16.1492   2
 -17   6   4 71.7126 14.8210   3
  17   6  -4 90.8792 15.3153   1
  16  -6  -4 -1.6297  4.5593   1
 -16  -6   4 3.39365 9.58526   2
  16   6  -4 -0.5083  6.2864   1
 -16   6   4 5.11780 8.04702   3
  15  -6  -4 135.270  17.113   1
 -15  -6   4 107.762  17.182   2
 -15   6   4 129.687  19.228   3
  15   6  -4 138.295  17.705   1
 -14  -6   4 3.82284 6.65022   2
  14  -6  -4 4.54866 5.87751   1
  14   6  -4 -0.7799  6.2129   1
  13  -6  -4 87.6751 13.2924   1
 -13  -6   4 82.3504 14.7473   2
  13   6  -4 84.9468 13.6597   1
  12  -6  -4 26.1255  7.5379   1
 -12  -6   4 31.9740 10.0030   2
  12   6  -4 35.5450  9.6671   1
 -11  -6   4 51.2080 11.3518   2
  11  -6  -4 84.4447 12.5635   1
  11   6  -4 88.3992 13.6177   1
 -10  -6   4 21.9163  7.9382   1
 -10  -6   4 0.75840 5.67190   2
  10  -6  -4 0.71102 4.08107   1
 -10   6   4 12.5329  5.3051   2
  10   6  -4 7.96994 6.19853   1
  -9  -6   4 10.4698  7.1340   2
  -9  -6   4 0.17034 5.12497   1
   9  -6  -4 -2.9625  3.9704   1
   9   6  -4 2.69301 4.89934   1
  -9   6   4 0.37153 4.09292   2
   8  -6  -4 5.06510 5.14956   1
  -8  -6   4 10.6757  6.3175   2
  -8  -6   4 2.87797 5.67676   1
  -8   6   4 10.2173  4.5704   2
   8   6  -4 -1.3221  4.6214   1
   7  -6  -4 17.7774  6.0470   1
  -7  -6   4 18.3667  6.5463   2
  -7  -6   4 25.1924  7.5203   1
  -7   6   4 32.6898  6.1785   2
   7   6  -4 26.4263  8.0556   1
  -6  -6   4 -2.7281  4.8415   2
   6  -6  -4 0.57495 4.45834   1
  -6  -6   4 -4.8177  4.2160   1
  -6   6   4 9.86729 4.24265   2
   6   6  -4 7.06482 5.69205   1
  -5  -6   4 118.399  14.122   1
   5  -6  -4 90.0758 11.5232   1
  -5  -6   4 89.8711 11.6390   2
  -5   6   4 77.6091  9.0177   2
   5   6  -4 91.7276  9.1720   3
   4  -6  -4 19.3010  5.8693   1
  -4  -6   4 17.0291  6.0623   2
  -4  -6   4 15.2691  7.4808   1
  -4   6   4 22.8591  5.4951   2
   4   6  -4 12.5575  5.0240   3
  -3  -6   4 384.394  21.985   1
  -3  -6   4 355.118  18.316   2
   3  -6  -4 382.823  19.143   1
   3  -6  -4 358.525  17.803   2
   3   6  -4 351.593  17.180   3
   2  -6  -4 48.0835  7.8713   1
  -2  -6   4 43.6026  9.5352   1
  -2  -6   4 50.2695  8.1493   2
   2  -6  -4 37.6569  7.1460   2
   2   6  -4 42.9083  7.7132   3
  -1  -6   4 569.068  27.269   1
   1  -6  -4 590.171  24.642   1
  -1  -6   4 563.907  22.653   2
   1  -6  -4 520.310  23.520   2
   1   6  -4 579.857  24.251   3
   0  -6  -4 131.780  13.446   1
   0  -6  -4 116.073  12.681   3
   0  -6  -4 113.812  12.356   2
   0  -6   4 137.989  15.408   1
   0  -6   4 118.653  10.864   2
   0   6  -4 141.305  14.065   3
  -1  -6  -4 589.181  25.178   3
  -1  -6  -4 610.020  25.493   1
   1  -6   4 581.496  28.084   1
  -1  -6  -4 604.096  26.284   2
   1  -6   4 614.078  22.033   2
  -1   6  -4 610.789  26.140   3
   2  -6   4 123.216  14.758   1
  -2  -6  -4 77.2774 10.3033   3
   2  -6   4 96.2666  8.6307   2
  -2  -6  -4 90.1021 12.2675   2
  -2  -6  -4 105.364  12.072   1
   2   6   4 100.492  11.555   1
  -2   6  -4 112.216  12.980   3
  -3  -6  -4 320.649  19.063   2
   3  -6   4 323.013  20.689   1
  -3  -6  -4 325.940  16.808   3
  -3  -6  -4 336.527  18.604   1
  -3   6  -4 351.031  19.839   3
   3   6   4 320.347  17.578   1
  -4  -6  -4 3.53574 3.67712   3
  -4  -6  -4 4.32807 4.43558   1
   4  -6   4 -1.4531  4.3550   1
  -4  -6  -4 -1.2198  3.8467   2
   4   6   4 3.92979 4.24114   1
  -4   6  -4 -2.8387  4.2958   3
  -5  -6  -4 219.960  15.811   1
   5  -6   4 216.208  19.938   1
  -5  -6  -4 224.161  16.452   2
  -5  -6  -4 213.670  12.833   3
  -5   6  -4 228.187  17.076   3
   5   6   4 210.395  14.441   1
  -6  -6  -4 -0.7238  4.4423   2
   6  -6   4 11.1919  5.9434   1
   6   6   4 9.75310 5.08565   1
  -6   6  -4 1.30488 5.35665   3
  -7  -6  -4 83.2187 12.7920   2
   7  -6   4 118.063  15.165   1
   7   6   4 117.262  13.206   1
  -7   6  -4 141.627  17.125   3
   8  -6   4 29.5174  9.8126   1
  -8  -6  -4 8.68708 6.42232   2
   8   6   4 19.1473  7.8899   1
  -8   6  -4 20.5970  8.5651   3
  -9  -6  -4 59.0055 11.8769   2
   9  -6   4 70.2899 12.6886   1
  -9   6  -4 49.1709 11.8384   3
   9   6   4 138.096  15.647   1
 -10  -6  -4 35.5163  9.5630   2
  10  -6   4 15.0103  7.4573   1
  10   6   4 31.2413  9.6525   1
 -10   6  -4 30.7752 10.8517   3
  11  -6   4 29.1273  9.3063   1
 -11  -6  -4 23.9953  9.3881   2
 -11   6  -4 30.3091 10.3901   3
  11   6   4 37.5844  9.2951   1
 -12  -6  -4 28.7660 10.3669   2
  12  -6   4 54.6698 12.1198   1
  12   6   4 66.6090 12.3898   1
 -12   6  -4 39.9931 11.8195   3
 -13  -6  -4 18.0749  8.9795   2
  13  -6   4 12.1198  8.1754   1
 -13   6  -4 2.35158 8.31308   3
  13   6   4 21.0372  9.1432   1
  14  -6   4 2.88189 6.53343   1
 -14  -6  -4 12.8781  8.0173   2
  14   6   4 -1.4656  6.9630   1
 -14   6  -4 -1.0760  8.3244   3
 -15  -6  -4 15.7938  9.4714   2
  15  -6   4 1.10618 7.45835   1
  15   6   4 12.2552  8.7556   1
 -15   6  -4 -4.1560  7.1994   3
 -16  -6  -4 7.66263 8.85977   2
  16  -6   4 7.27095 7.27948   1
 -16   6  -4 -10.434   7.517   3
  16   6   4 5.88969 9.24076   1
  17  -6   4 26.5754 12.6420   1
 -17  -6  -4 13.4393 10.6770   2
 -17   6  -4 17.2459 11.9948   3
  17   6   4  7.6785 10.1832   1
 -18  -6  -4 -4.1904  8.1933   2
  18  -6   4 6.93647 9.09746   1
 -18   6  -4 -5.8121  9.6109   3
  18   6   4 -1.0123  8.7784   1
 -19  -6  -4  8.2113 10.3455   2
  19  -6   4 6.90769 8.32833   1
 -19   6  -4  3.2153 10.9145   3
  19   6   4  8.1674 11.7588   1
  20  -6   4 13.5062 11.5628   1
 -20  -6  -4  3.5900 11.9422   2
  20   6   4  3.4284 11.0754   1
 -20   6  -4 -26.348  11.186   3
  21  -6   4 10.8573 10.1649   1
 -21  -6  -4 -1.1194 10.5551   2
  21   6   4  3.6420 13.3545   1
 -21   6  -4 -4.1805 11.7815   3
  22  -6   4 7.09924 9.36351   1
 -22  -6  -4  9.4943 12.4330   2
  22   6   4 13.6411 13.3120   1
 -22   6  -4 -14.883  13.085   3
 -23  -7   4  5.7961 13.8919   2
 -23   7   4 14.3746 12.0173   3
  23   7  -4 -5.8154 12.9272   1
 -22  -7   4  9.5134 12.0025   2
 -22   7   4 11.4482 11.3403   3
  22   7  -4 11.1943 11.6760   1
 -21  -7   4  6.4794 10.5734   2
  21   7  -4 4.08390 9.78568   1
 -21   7   4 21.6388 13.6822   3
 -20  -7   4 -4.1222 10.9554   2
  20   7  -4 2.18757 9.20953   1
 -20   7   4 27.2446 12.7104   3
 -19  -7   4  4.1570 10.2412   2
 -19   7   4 4.86319 9.96006   3
  19   7  -4 -3.2770  7.8780   1
 -18  -7   4 1.91569 8.07987   2
  18  -7  -4 1.94723 8.41595   1
 -18   7   4 11.3929 10.7763   3
  18   7  -4 4.79987 8.74572   1
  17  -7  -4 23.4731 10.4206   1
 -17  -7   4 9.10445 9.44429   2
  17   7  -4 17.8968 10.2731   1
 -17   7   4 34.4468 13.1619   3
 -16  -7   4 -1.8298  8.5933   2
  16  -7  -4 7.53865 7.37785   1
  16   7  -4 -0.8782  6.9430   1
 -16   7   4 9.90301 9.94198   3
  15  -7  -4 38.4514 11.1659   1
 -15  -7   4 12.4976  9.5555   2
  15   7  -4 28.1530 11.3272   1
 -15   7   4 18.1478  9.9665   3
 -14  -7   4 4.88708 8.36708   2
  14  -7  -4 8.29295 7.95422   1
 -14   7   4 1.60620 7.49224   3
  14   7  -4 -6.1103  6.2386   1
  13  -7  -4 140.271  17.716   1
 -13  -7   4 123.860  18.949   2
  13   7  -4 110.551  15.508   1
  12  -7  -4 -4.7394  4.1065   1
 -12  -7   4 6.29444 7.33743   2
  12   7  -4 -6.0941  5.3789   1
  11  -7  -4 236.523  21.616   1
 -11  -7   4 240.354  24.021   1
 -11  -7   4 217.382  22.718   2
  11   7  -4 230.110  22.107   1
 -10  -7   4 -0.6787  6.2256   1
 -10  -7   4 -1.7893  6.3465   2
  10  -7  -4 0.98930 5.74852   1
  10   7  -4 3.62770 6.40974   1
  -9  -7   4 410.752  25.908   1
  -9  -7   4 449.440  25.862   2
   9  -7  -4 428.619  23.710   1
   9   7  -4 364.430  23.734   1
  -8  -7   4 1.17314 5.94001   2
   8  -7  -4 -1.1085  5.7590   1
  -8  -7   4 7.65050 8.05459   1
  -8   7   4 -0.5924  3.8372   2
   8   7  -4 1.54995 5.41937   1
  -7  -7   4 206.973  20.740   1
  -7  -7   4 216.846  20.661   2
   7  -7  -4 216.215  16.265   1
   7   7  -4 190.420  19.619   1
  -7   7   4 175.737  11.991   2
  -6  -7   4 1.76966 5.27847   2
   6  -7  -4 11.5390  6.4144   1
  -6  -7   4 -0.5605  5.5799   1
  -6   7   4 6.20429 4.36031   2
   6   7  -4 8.27758 6.50059   1
  -5  -7   4 197.555  19.681   1
   5  -7  -4 171.582  16.594   1
  -5  -7   4 205.958  15.725   2
  -5   7   4 178.190  12.275   2
  -4  -7   4 2.93660 5.09653   2
   4  -7  -4 4.82073 5.73208   1
  -4  -7   4 1.68737 6.21879   1
   4   7  -4 -1.6568  4.2551   3
  -4   7   4 6.52109 4.43374   2
  -3  -7   4 300.658  17.659   2
  -3  -7   4 311.497  20.975   1
   3  -7  -4 299.535  17.184   2
   3  -7  -4 300.811  18.109   1
   3   7  -4 299.323  17.060   3
   2  -7  -4 1.32533 3.67530   2
  -2  -7   4 -3.1392  4.7733   1
   2  -7  -4 1.23523 4.11546   1
  -2  -7   4 5.80761 4.91891   2
   2   7  -4 8.74683 5.88989   3
   1  -7  -4 109.308  12.885   1
   1  -7  -4 145.455  14.742   2
  -1  -7   4 116.360  16.009   1
  -1  -7   4 124.197  12.507   2
   1   7  -4 127.628  13.955   3
   0  -7  -4 2.02377 4.25506   1
   0  -7   4 -4.8063  4.3146   1
   0  -7   4 1.77337 4.27912   2
   0  -7  -4 2.79990 5.17366   2
   0   7  -4 -1.8071  5.7459   3
   1  -7   4 4.25920 5.98167   1
  -1  -7  -4 11.4101  6.2823   2
  -1  -7  -4 21.4270  7.1701   1
  -1   7  -4 22.3620  7.8020   3
  -2  -7  -4 2.02847 4.87514   1
   2  -7   4 -5.4206  4.8511   1
  -2  -7  -4 4.13573 4.98288   2
   2   7   4 -6.6404  2.8952   1
  -2   7  -4 5.73937 6.55858   3
  -3  -7  -4 7.45335 6.06136   1
   3  -7   4 32.6839  9.2444   1
  -3  -7  -4 6.60087 5.75962   2
   3   7   4 13.7915  6.3640   1
  -3   7  -4 17.6286  7.2995   3
  -4  -7  -4 0.60052 4.73130   1
  -4  -7  -4 -1.7296  4.5405   2
   4  -7   4 0.19245 5.23340   1
  -4   7  -4 -5.2480  6.0297   3
   4   7   4 -2.0576  3.5710   1
   5  -7   4 84.0939 14.0876   1
  -5  -7  -4 99.5996 13.6311   1
  -5  -7  -4 84.6624 13.0680   2
  -5   7  -4 82.2658 13.6780   3
   5   7   4 102.624  12.810   1
   6  -7   4 -0.8150  6.0674   1
  -6  -7  -4 6.35794 6.34198   2
   6   7   4 8.20323 5.89362   1
  -6   7  -4 -2.0155  5.9072   3
   7  -7   4 177.193  19.818   1
  -7  -7  -4 173.544  19.358   2
  -7   7  -4 211.403  21.779   3
   7   7   4 205.919  18.384   1
   8  -7   4 0.79895 6.07672   1
  -8  -7  -4 3.78884 6.67662   2
  -8   7  -4 7.40889 7.71369   3
   8   7   4 1.34375 5.68147   1
   9  -7   4 149.322  19.236   1
  -9  -7  -4 145.650  18.684   2
  -9   7  -4 162.861  20.396   3
   9   7   4 138.494  17.114   1
  10  -7   4 4.30533 6.20215   1
 -10  -7  -4 0.30976 7.19023   2
  10   7   4 3.25547 5.85250   1
 -10   7  -4 -0.5752  7.5935   3
  11  -7   4 124.805  18.654   1
 -11  -7  -4 99.0200 16.4270   2
  11   7   4 105.604  15.805   1
 -11   7  -4 106.190  17.904   3
  12  -7   4 4.85526 6.93690   1
 -12  -7  -4 -0.9795  6.7111   2
  12   7   4 2.60048 7.73265   1
 -12   7  -4 -2.7820  7.7482   3
  13  -7   4 82.1823 15.5202   1
 -13  -7  -4 92.0796 16.8245   2
 -13   7  -4 85.2972 16.4942   3
  13   7   4 104.432  17.297   1
  14  -7   4 0.54605 7.93810   1
 -14  -7  -4 0.25892 8.06740   2
 -14   7  -4 4.35184 9.08096   3
  14   7   4 0.82161 7.19122   1
  15  -7   4 66.6034 14.6981   1
 -15  -7  -4 74.0095 16.4172   2
  15   7   4 72.9074 15.8667   1
 -15   7  -4 105.197  20.031   3
 -16  -7  -4  0.8880 10.2986   2
  16  -7   4 -2.9802  6.9115   1
 -16   7  -4 13.1443 11.0566   3
  16   7   4 20.8390 10.7707   1
  17  -7   4 27.2566 11.5305   1
 -17  -7  -4 31.8088 13.9672   2
  17   7   4 21.3400 12.3867   1
 -17   7  -4 32.7523 13.2820   3
  18  -7   4 -12.065   6.625   1
 -18  -7  -4 1.10558 9.30622   2
 -18   7  -4 -8.8411  9.7363   3
  18   7   4 -0.1370 12.1171   1
 -19  -7  -4 10.6644 10.9697   2
  19  -7   4 -3.2029  7.8942   1
  19   7   4 -0.6269 10.7347   1
 -19   7  -4 -9.9616 13.1144   3
  20  -7   4 -2.2195  9.9968   1
 -20  -7  -4 -5.9195 12.0609   2
 -20   7  -4  5.3495 14.5000   3
  20   7   4 -8.4854 11.0020   1
  21  -7   4 -13.650  10.144   1
 -21  -7  -4 -3.5622 13.7434   2
  21   7   4  0.4089 11.8217   1
 -21   7  -4  8.1998 13.2470   3
 -21  -8   4 15.6483 15.3085   2
 -21   8   4  9.2480 14.3553   3
  21   8  -4  0.1825 12.8766   1
 -20  -8   4 12.2430 13.6000   2
 -20   8   4 17.3204 13.2276   3
  20   8  -4  2.5497 10.4408   1
 -19  -8   4 31.0759 13.9216   2
 -19   8   4 44.9270 14.8721   3
  19   8  -4  7.8979 10.9097   1
 -18  -8   4 16.1479 10.3901   2
  18   8  -4 -6.8847  8.9823   1
 -18   8   4 2.04697 9.62390   3
 -17  -8   4 56.4891 16.7535   2
  17   8  -4 39.8058 13.1981   1
 -17   8   4 25.3666 10.8506   3
 -16  -8   4 2.92849 8.61265   2
 -16   8   4 -5.0824  7.6766   3
  16   8  -4 7.94846 8.95969   1
 -15  -8   4 50.6321 15.0651   2
  15   8  -4 38.2815 12.2479   1
 -15   8   4 41.8557 13.1551   3
 -14  -8   4 -1.4324  7.7622   2
  14  -8  -4 -1.8034  6.1471   1
  14   8  -4 1.35997 7.33869   1
 -14   8   4 20.3951 10.6225   3
 -13  -8   4 31.6696 12.4349   2
  13  -8  -4 48.1305 11.3640   1
  13   8  -4 39.4612 11.2004   1
 -13   8   4 64.5178 15.7525   3
 -12  -8   4 10.5065  8.1407   2
  12  -8  -4 3.53415 7.44747   1
  12   8  -4 10.0193  7.0911   1
 -11  -8   4 33.3582 11.2518   1
  11  -8  -4 8.28286 6.59415   1
 -11  -8   4 4.65815 7.15340   2
  11   8  -4 2.91344 8.03343   1
 -10  -8   4 -6.2344  5.0659   2
  10  -8  -4 5.98270 7.40407   1
 -10  -8   4 -4.0050  6.1542   1
  10   8  -4 4.92547 8.09585   1
   9  -8  -4 4.39227 5.55551   1
  -9  -8   4 6.07702 7.94251   1
  -9  -8   4 8.70572 8.58252   2
   9   8  -4 -6.7248  4.8405   1
   8  -8  -4 36.7085  9.5014   1
  -8  -8   4 21.1231  8.9538   1
  -8  -8   4 31.1095 10.0576   2
   8   8  -4 53.5656 12.7717   1
  -7  -8   4 2.12348 6.13560   1
  -7  -8   4 -3.5889  6.5859   2
   7  -8  -4 7.36228 6.04192   1
   7   8  -4 -5.5722  5.3727   1
  -6  -8   4 10.3352  7.4452   1
  -6  -8   4 31.4992  8.7429   2
   6  -8  -4 14.5249  7.3654   1
  -6   8   4 35.8179  7.8723   2
   6   8  -4 27.2221  9.4319   1
  -5  -8   4 11.3038  9.2110   1
  -5  -8   4 4.78749 7.08242   2
   5  -8  -4 -2.1775  5.9432   1
  -5   8   4 9.71903 5.92674   2
  -4  -8   4 18.6860  7.5521   2
  -4  -8   4 1.45102 6.65681   1
   4  -8  -4 16.3238  6.8553   1
  -4   8   4 9.40109 5.55569   2
  -3  -8   4 89.3004 12.8527   2
  -3  -8   4 69.5950 13.2032   1
   3  -8  -4 73.1824 12.5089   1
   3  -8  -4 105.521  13.058   2
  -2  -8   4 -4.7432  5.2602   1
   2  -8  -4 5.81292 5.15798   2
   2  -8  -4 2.20630 5.64975   1
  -2  -8   4 -0.4306  4.8506   2
   2   8  -4 -5.4269  5.3478   3
   1  -8  -4 183.169  17.955   1
   1  -8  -4 217.184  19.022   2
  -1  -8   4 223.488  23.506   1
   1   8  -4 205.882  18.867   3
   0  -8  -4 4.64471 5.28047   2
   0  -8  -4 4.94413 6.56091   1
   0  -8   4 -1.4072  6.6060   1
   0   8  -4 7.36452 6.29632   3
   1  -8   4 308.627  22.917   1
  -1  -8  -4 286.655  19.703   2
  -1  -8  -4 293.992  19.732   1
  -1   8  -4 247.681  18.440   3
   1   8   4 282.438  19.144   1
  -2  -8  -4 26.9441  8.4339   1
   2  -8   4 8.36967 7.01874   1
  -2  -8  -4 22.8295  8.4969   2
   2   8   4 27.9137  8.9195   1
  -2   8  -4 36.4925  9.6698   3
  -3  -8  -4 226.009  21.054   2
   3  -8   4 226.403  23.043   1
  -3  -8  -4 197.393  19.299   1
   3   8   4 235.282  17.181   1
  -3   8  -4 240.842  22.768   3
  -4  -8  -4 23.5853  7.8473   1
   4  -8   4 24.2528  9.1607   1
  -4  -8  -4 25.4989  8.6798   2
  -4   8  -4 28.5537  9.4079   3
   4   8   4 21.3691  7.2938   1
  -5  -8  -4 122.096  16.715   1
   5  -8   4 122.924  17.832   1
  -5  -8  -4 99.4828 15.0611   2
   5   8   4 127.043  15.691   1
  -5   8  -4 124.347  17.249   3
  -6  -8  -4 4.23818 6.97661   2
   6  -8   4 3.87255 8.61652   1
  -6  -8  -4 18.0365  8.1609   1
  -6   8  -4 32.6069 10.1021   3
   6   8   4 10.9158  6.4330   1
  -7  -8  -4 65.5692 13.4604   2
   7  -8   4 69.6899 14.8820   1
   7   8   4 46.4472 10.4718   1
  -7   8  -4 83.5302 15.7278   3
  -8  -8  -4 -1.4718  7.1580   2
   8  -8   4 1.23094 7.19934   1
  -8   8  -4 -4.5407  8.4845   3
   8   8   4 1.25468 4.77568   1
   9  -8   4 28.1927  9.9903   1
  -9  -8  -4 44.8784 12.6524   2
  -9   8  -4 63.3941 14.8888   3
   9   8   4 23.1261  9.0803   1
 -10  -8  -4 6.45359 7.66120   2
  10  -8   4 7.88174 8.44400   1
  10   8   4 -4.3582  6.9269   1
 -10   8  -4 15.4715 10.1653   3
 -11  -8  -4 -4.2963  6.3814   2
  11  -8   4 -4.7105  6.0993   1
 -11   8  -4 1.51248 8.50023   3
  11   8   4 14.1848  9.6688   1
  12  -8   4 3.44372 7.93603   1
 -12  -8  -4 14.6095  9.0442   2
 -12   8  -4 -2.4651 10.1182   3
  12   8   4 -9.9921  5.2986   1
 -13  -8  -4 -0.1962  7.6427   2
  13  -8   4 7.05689 8.75554   1
  13   8   4 3.92298 8.51258   1
 -13   8  -4 -7.8139  8.5394   3
 -14  -8  -4  9.2135 11.5309   2
  14  -8   4 1.97889 7.79681   1
 -14   8  -4 -5.3691 10.8264   3
  14   8   4 -2.2076  7.0762   1
  15  -8   4 -4.4407  8.6808   1
 -15  -8  -4 5.11711 9.70068   2
  15   8   4 -7.9812  7.5244   1
 -15   8  -4 0.80948 9.96139   3
  16  -8   4 -1.9422  8.2852   1
 -16  -8  -4 -1.9966 10.3987   2
  16   8   4 -5.7488  7.8667   1
 -16   8  -4 -13.241   9.071   3
  17  -8   4  7.4402 10.0699   1
 -17  -8  -4 -2.7826 11.4558   2
 -17   8  -4 -7.5541 12.8349   3
  17   8   4 13.4218 12.5608   1
  18  -8   4 -1.1767  9.8705   1
 -18  -8  -4  0.1171 11.8904   2
 -18   8  -4 -6.7093 13.0768   3
  18   8   4 -1.9055 13.2882   1
 -19  -8  -4 16.7932 13.8384   2
  19  -8   4 -3.8531  8.1917   1
  19   8   4 -6.5906 13.7673   1
 -19   8  -4 -24.986  11.819   3
 -19  -9   4 14.0445 11.9739   2
 -19   9   4 14.9301 13.5752   3
  19   9  -4  8.8407 11.4363   1
 -18  -9   4 16.1320 13.5746   2
  18   9  -4  5.3596 12.5907   1
 -18   9   4 8.47338 9.10307   3
 -17  -9   4  0.3474 10.1863   2
  17   9  -4 -0.0939  9.7446   1
 -17   9   4 15.2980 11.1032   3
 -16  -9   4  4.8526 10.9893   2
  16   9  -4 14.8923 10.1160   1
 -16   9   4  6.9759 10.3300   3
 -15  -9   4  7.4464 10.0827   2
 -15   9   4 19.9504 10.7936   3
  15   9  -4 22.9354 12.3210   1
 -14  -9   4  8.7877 10.4149   2
 -14   9   4 11.0494 10.5894   3
  14   9  -4 -5.4790  6.4543   1
 -13  -9   4 14.7201 10.6655   2
 -13   9   4 17.9232  9.9135   3
  13   9  -4  9.9771 10.0974   1
 -12  -9   4 8.29257 8.32584   2
  12   9  -4 9.61064 7.48551   1
 -12   9   4 3.47650 7.54886   3
 -11  -9   4 54.9823 13.5464   2
 -11  -9   4 14.5726  9.9458   1
 -11   9   4 26.4447 11.3016   3
  11   9  -4 35.7261 11.4081   1
 -10  -9   4 7.91321 8.14329   1
 -10  -9   4 2.15749 7.22158   2
  10   9  -4 18.2958  8.6778   1
  -9  -9   4 38.0848 11.6754   2
  -9  -9   4 55.0306 14.0237   1
   9   9  -4 22.4941 10.9807   1
  -8  -9   4 25.6203 10.0585   1
  -8  -9   4 6.18395 8.53561   2
   8  -9  -4 30.2046 10.1220   1
   8   9  -4 15.7666  9.4648   1
  -7  -9   4 69.0578 13.3207   2
   7  -9  -4 70.1349 14.2052   1
  -7  -9   4 75.6692 14.4726   1
   7   9  -4 65.5981 14.5776   1
   6  -9  -4 3.02959 6.85282   1
  -6  -9   4 1.67547 6.72821   2
  -6  -9   4 22.3353  9.0480   1
   6   9  -4 7.37092 8.40944   1
   5  -9  -4 72.5526 13.9732   1
  -5  -9   4 127.212  16.764   2
  -5  -9   4 92.9508 16.3788   1
   4  -9  -4 3.82237 6.26895   1
  -4  -9   4 4.26754 7.73286   1
  -4  -9   4 0.41017 6.43129   2
  -3  -9   4 53.2437 13.1924   1
   3  -9  -4 52.8295 12.1992   1
   2  -9  -4 9.93130 7.40795   1
   2  -9  -4 17.3136  7.0044   2
  -2  -9   4 24.4347  9.6995   1
  -1  -9   4 21.6084 11.1060   1
   1  -9  -4 16.7410  8.4909   1
   1  -9  -4 27.4985  8.8783   2
   1   9  -4 24.0544  9.2869   3
   0  -9  -4 27.3891  8.9223   1
   0  -9   4 13.8428  8.5384   1
   0  -9  -4 6.52836 6.34250   2
   0   9  -4 8.74698 8.44985   3
  -1  -9  -4 3.65233 6.11142   1
  -1  -9  -4 14.8751  7.7094   2
   1  -9   4 -0.4879  6.9885   1
  -1   9  -4 6.69616 8.29500   3
   1   9   4 17.3379  8.5053   1
   2  -9   4 3.14227 7.39138   1
  -2  -9  -4 -2.2465  5.2084   2
  -2  -9  -4 12.1495  7.9228   1
   2   9   4 -0.6463  6.1635   1
  -2   9  -4 -6.7222  7.4326   3
  -3  -9  -4 -6.0986  6.6500   2
  -3  -9  -4 4.38860 7.38254   1
   3  -9   4 -0.6691  6.8389   1
   3   9   4 3.32199 7.38599   1
  -3   9  -4 -8.8732  5.1189   3
  -4  -9  -4 -0.9589  5.6396   2
   4  -9   4 1.92227 8.28497   1
  -4  -9  -4 -3.1085  5.6415   1
  -4   9  -4 -3.4256  8.1362   3
   4   9   4 0.76993 6.13546   1
  -5  -9  -4 1.54635 6.02606   1
  -5  -9  -4 -1.6180  7.6510   2
   5  -9   4 16.7579 10.3897   1
  -5   9  -4 6.45133 8.94746   3
   5   9   4 11.9780  7.2079   1
   6  -9   4 1.16899 7.70992   1
  -6  -9  -4 -9.4662  5.1690   2
  -6  -9  -4 9.50283 7.53950   1
   6   9   4 3.62191 6.14031   1
  -6   9  -4 4.20774 9.04062   3
   7  -9   4 27.6388 10.7621   1
  -7  -9  -4 30.2983 11.2474   2
   7   9   4 59.1506 11.6452   1
  -7   9  -4 22.7217 11.1119   3
   8  -9   4 -0.5461  6.9497   1
  -8  -9  -4 5.99253 8.52041   2
   8   9   4 -4.6985  6.2126   1
  -8   9  -4  8.3688 10.9050   3
   9  -9   4 37.2450 12.9026   1
  -9  -9  -4 33.2672 11.1192   2
  -9   9  -4 53.0426 14.4863   3
   9   9   4 48.0260 11.8616   1
  10  -9   4 27.7339 12.0842   1
 -10  -9  -4 19.3089 10.0749   2
  10   9   4 21.0661  9.9746   1
 -10   9  -4  6.9231 10.8549   3
  11  -9   4 39.7240 12.7884   1
 -11  -9  -4 51.5849 14.3145   2
  11   9   4 39.3237 11.4708   1
 -11   9  -4 37.6256 14.3755   3
  12  -9   4 10.4439  9.8876   1
 -12  -9  -4 11.4299 10.9689   2
 -12   9  -4 22.9517 12.6858   3
  12   9   4 5.83707 9.05616   1
  13  -9   4 22.1205 11.3839   1
 -13  -9  -4 22.0404 12.9116   2
 -13   9  -4 12.4483 12.8876   3
  13   9   4 11.1751  9.7282   1
  14  -9   4 2.47775 8.64709   1
 -14  -9  -4 3.06800 9.63453   2
  14   9   4 -7.3188  9.4701   1
 -14   9  -4 10.6331 11.4176   3
 -15  -9  -4 18.4275 11.0717   2
  15  -9   4 24.9144 12.7836   1
 -15   9  -4 14.6541 13.0902   3
  15   9   4 42.9553 14.2259   1
  16  -9   4 12.3344 10.4968   1
 -16  -9  -4  9.5116 10.0944   2
  16   9   4 1.36010 9.83172   1
 -16   9  -4  6.0849 12.6563   3
 -17  -9  -4 16.0187 15.5163   2
  17  -9   4 29.1528 13.2293   1
  17   9   4  0.2952 11.9570   1
 -17   9  -4 19.1273 16.5719   3
 -18  -9  -4  5.4777 14.4969   2
  18  -9   4  5.4407 13.3879   1
  18   9   4 17.8106 14.4950   1
 -18   9  -4  5.5816 17.0014   3
 -17 -10   4  5.4345 13.3904   2
  17  10  -4 12.7019 13.5526   1
 -17  10   4  4.6409 11.9835   3
 -16 -10   4  7.6441 13.1903   2
  16  10  -4 20.4000 12.4485   1
 -16  10   4 14.9258 11.9062   3
 -15 -10   4  9.1663 10.9990   2
 -15  10   4 16.6492 12.0296   3
  15  10  -4 -8.7820  9.1632   1
 -14 -10   4  7.5606 10.8794   2
  14  10  -4 -12.661   7.299   1
 -14  10   4 17.2829 12.5247   3
 -13 -10   4 17.6481 11.1551   2
  13  10  -4 -3.5555  8.7955   1
 -13  10   4 20.2727 11.0763   3
 -12 -10   4  9.1277 10.9558   2
 -12  10   4 5.67889 9.75144   3
  12  10  -4 0.85615 7.90826   1
 -11 -10   4 1.47477 9.96711   2
 -11 -10   4 6.47917 9.65824   1
  11  10  -4 7.49637 8.65984   1
 -11  10   4 14.4805  9.5908   3
 -10 -10   4 -2.7569  7.9353   2
 -10 -10   4 12.0984  9.3435   1
  10  10  -4 -5.3837  6.3396   1
 -10  10   4 21.4939 10.7473   3
  -9 -10   4 10.8361 10.1007   2
  -9 -10   4 8.99267 9.65349   1
  -9  10   4 11.8597  8.7114   3
   9  10  -4 1.10503 9.72143   1
  -8 -10   4 13.6123 10.0692   2
  -8 -10   4 7.94648 8.25882   1
   8  10  -4 -3.4829  7.0795   1
  -8  10   4 -0.7327  8.4550   3
  -7 -10   4 2.23480 7.40080   2
  -7 -10   4 -3.0676  7.1094   1
   7  10  -4 -0.5728  8.0905   1
  -7  10   4 4.19610 8.31868   3
  -6 -10   4 0.77495 7.90749   1
  -6 -10   4 7.85711 8.51319   2
   6  10  -4 5.06308 8.16718   1
  -5 -10   4 20.4624 10.0019   1
   5  10  -4 16.2578  9.5640   1
  -4 -10   4 5.25981 8.44153   1
  -3 -10   4 5.77177 8.65876   1
   3 -10  -4 35.7438 10.9808   1
   2 -10  -4 24.8741 10.3912   1
  -2 -10   4 23.4475 10.0921   1
   1 -10  -4 38.5009 11.6997   1
  -1 -10   4 35.5722 12.0784   1
   1 -10  -4 47.9594 11.7883   2
   0 -10  -4 51.8588 12.2645   2
   0 -10   4 47.7800 14.9043   1
   0 -10  -4 44.5681 11.5973   1
   1 -10   4 24.4914 10.7394   1
  -1 -10  -4 24.6434  9.5597   1
  -1 -10  -4 39.8667 11.7616   2
   1  10   4 45.4272 12.3090   1
  -1  10  -4 40.7862 11.7481   3
   2 -10   4 21.0255 10.5529   1
  -2 -10  -4 44.3913 12.3776   1
  -2 -10  -4 31.9982  9.3898   2
  -2  10  -4 8.67348 8.42075   3
   2  10   4 22.5735  9.7101   1
   3 -10   4 77.6065 16.3630   1
  -3 -10  -4 54.9464 13.3918   1
  -3 -10  -4 41.6633 11.4229   2
  -3  10  -4 48.3768 13.3957   3
   3  10   4 68.8334 13.5910   1
  -4 -10  -4 14.9156  9.2035   1
   4 -10   4 22.8065 11.4322   1
  -4 -10  -4 8.83959 7.05561   2
   4  10   4 11.7128  7.5353   1
  -4  10  -4 25.0756 11.4647   3
  -5 -10  -4 34.0282 11.5324   2
   5 -10   4 40.9686 13.6130   1
  -5 -10  -4 40.0164 11.3275   1
   5  10   4 31.9131  9.9146   1
  -5  10  -4 24.9050 12.1252   3
  -6 -10  -4 6.35425 7.96121   2
  -6 -10  -4 7.72268 9.46365   1
   6 -10   4 -2.0205  8.1292   1
   6  10   4 21.8433 10.2198   1
  -6  10  -4  6.4314 10.5412   3
  -7 -10  -4 17.6250  9.2982   2
   7 -10   4 27.1432 11.3726   1
  -7  10  -4 15.7125 10.7342   3
   7  10   4 26.8748  9.8445   1
  -8 -10  -4 17.0307 10.4701   2
   8 -10   4 11.0890  9.5587   1
  -8  10  -4 3.00359 8.99281   3
   8  10   4 2.80496 7.20430   1
  -9 -10  -4 7.58352 8.50086   2
   9 -10   4 14.5256 11.3101   1
  -9  10  -4 -0.3855 10.0181   3
   9  10   4 12.2656  9.0496   1
  10 -10   4 -1.9043  8.1503   1
 -10 -10  -4 20.8179 11.6080   2
  10  10   4 -1.3550  7.0131   1
 -10  10  -4 -1.0142 11.8233   3
  11 -10   4 14.9063 10.7562   1
 -11 -10  -4 2.63799 9.86723   2
  11  10   4 17.1964  9.6262   1
 -11  10  -4 -19.533  10.792   3
 -12 -10  -4 -1.0923  9.1040   2
  12 -10   4 -11.169  11.032   1
 -12  10  -4 -10.448  13.634   3
  12  10   4 1.99084 9.53423   1
  13 -10   4 -10.878   7.714   1
 -13 -10  -4 -7.9164  8.8548   2
  13  10   4 10.4583 10.4280   1
 -13  10  -4 -15.656  12.052   3
 -14 -10  -4 2.72420 9.37144   2
  14 -10   4 -1.3857  8.8588   1
 -14  10  -4 -10.705  10.479   3
  14  10   4 0.76232 9.77322   1
  15 -10   4 4.76827 9.12159   1
 -15 -10  -4  0.1062 11.7402   2
  15  10   4 5.98897 9.84754   1
 -15  10  -4 16.5894 15.3388   3
 -14 -11   4 10.4145 13.3782   2
 -14  11   4 16.1308 14.8105   3
  14  11  -4  4.6108 12.2771   1
 -13 -11   4 10.2664 12.3837   2
  13  11  -4 -3.6181  9.4452   1
 -13  11   4 19.7543 12.0117   3
 -12 -11   4  6.1921 11.6251   2
 -12  11   4 18.4324 12.9243   3
  12  11  -4 10.9937  9.7539   1
 -11 -11   4  3.8238 10.2775   2
 -11 -11   4  6.7382 10.0446   1
  11  11  -4 13.7267 10.4716   1
 -11  11   4 11.2580 11.8488   3
 -10 -11   4 18.8394 11.0506   1
 -10 -11   4  5.7423 11.0009   2
  10  11  -4 27.1610 12.9326   1
 -10  11   4 44.8039 13.9821   3
  -9 -11   4 13.0740 11.0411   1
  -9 -11   4 -3.3716  9.4273   2
  -9  11   4 23.4421 12.0777   3
   9  11  -4 -2.9300  8.6117   1
  -8 -11   4 5.59312 9.56089   1
   8  11  -4  7.6775 10.5067   1
  -8  11   4 41.4758 14.6396   3
  -7 -11   4 21.9804 11.6986   1
   7  11  -4  6.2614 10.2045   1
  -7  11   4 16.0805 11.5970   3
  -6 -11   4 4.04834 8.06926   1
   6  11  -4 17.2142 11.0908   1
  -6  11   4 38.6759 13.0216   3
  -5 -11   4 13.8684  9.8440   1
   5  11  -4 4.61412 9.47601   1
  -5  11   4 27.0211 10.7992   3
  -4 -11   4 9.02411 9.65633   1
  -4  11   4 32.3308 11.4829   3
  -3 -11   4 -4.5365  7.3363   1
  -2 -11   4 7.52077 9.99111   1
  -1 -11   4 19.0076 10.0703   1
   0 -11   4 -6.2240  7.6304   1
   1 -11   4  6.9879 11.5094   1
   1  11   4 -7.4815  7.9302   1
  -2 -11  -4 6.19827 8.87317   2
   2 -11   4 -13.281   6.574   1
   2  11   4 -0.2067  9.1053   1
   3 -11   4 5.64851 9.05356   1
  -3 -11  -4 0.23432 8.71432   2
   3  11   4 1.78422 7.94504   1
  -3  11  -4 -12.504   7.706   3
  -4 -11  -4 -6.3186  8.4403   2
  -4 -11  -4 -1.5866  9.4089   1
   4 -11   4 -10.339   8.062   1
   4  11   4 11.2592  7.9542   1
  -4  11  -4 -10.631   9.046   3
  -5 -11  -4 6.06446 9.57169   1
  -5 -11  -4 0.57569 8.66873   2
   5 -11   4  3.0108 11.0144   1
  -5  11  -4 -7.3647  8.2183   3
   5  11   4 -9.7389  6.7229   1
  -6 -11  -4  5.5361 10.0802   1
   6 -11   4  2.4382 11.3754   1
  -6 -11  -4 -2.0125  9.8444   2
   6  11   4 2.18742 8.50840   1
  -6  11  -4 -6.2557  9.2180   3
   7 -11   4 21.2081 13.0465   1
  -7 -11  -4 -0.0745  8.7854   2
  -7  11  -4  4.8320 11.1868   3
   7  11   4 -2.0327  8.3709   1
   8 -11   4  9.6744 10.0223   1
  -8 -11  -4 16.8148 12.0739   2
  -8  11  -4 19.1581 13.5569   3
   8  11   4  9.6135 10.3769   1
   9 -11   4  9.6657 12.3253   1
  -9 -11  -4  5.4403 10.2443   2
  -9  11  -4  3.3545 12.0166   3
   9  11   4  4.3766 10.0136   1
  10 -11   4 11.5877 12.6050   1
 -10 -11  -4 11.8828 10.6528   2
  10  11   4 5.60930 9.48746   1
 -10  11  -4 -4.1614 13.4069   3
 -11 -11  -4 -1.3935  8.9067   2
  11 -11   4 1.20333 9.71785   1
 -11  11  -4  3.4591 12.3385   3
  11  11   4 -1.7002 10.0947   1
  12 -11   4 -2.0040 10.3698   1
 -12 -11  -4  8.5557 10.8041   2
 -12  11  -4 34.4618 16.3514   3
  12  11   4  2.1944 10.7772   1
  10  12  -4 -1.1425  9.8347   1
 -10  12   4  6.4222 10.5402   3
  -9 -12   4 -7.0909 11.1773   1
   9  12  -4  0.1729 11.5658   1
  -9  12   4 28.3995 14.2312   3
  -8 -12   4  2.4406 10.3725   1
  -8  12   4 14.2270 12.7396   3
   8  12  -4 2.75770 9.01361   1
  -7 -12   4  6.2251 10.1427   1
   7  12  -4  9.4522 10.4668   1
  -7  12   4 12.2603 12.8599   3
  -6 -12   4 -4.6488 11.1584   1
   6  12  -4  9.0278 13.2569   1
  -6  12   4 13.8157 10.5889   3
  -5 -12   4 0.48970 9.12533   1
   5  12  -4 -4.2971  8.7870   1
  -4 -12   4 -6.8373  8.3810   1
   4  12  -4  6.2786 11.3498   1
  -3 -12   4 -7.4324 10.6114   1
  -2 -12   4 12.2546 11.5739   1
  -1 -12   4  7.0397 12.2281   1
   0 -12   4 28.3119 13.4208   1
   1 -12   4  6.6578 11.4900   1
   2 -12   4 55.1199 17.1551   1
   3 -12   4 -2.6825  9.6750   1
   4 -12   4  4.4913 10.4253   1
   5 -12   4 -6.3833  8.1873   1
  -5 -12  -4  6.7125 11.2106   2
  -5  12  -4  4.6654 12.8965   3
  -6 -12  -4 10.2281 11.9357   2
   6 -12   4 -8.5785  8.6127   1
  -6  12  -4 -1.8936 10.7968   3
   7 -12   4 -5.4700 10.1012   1
  -7 -12  -4 3.91867 9.54075   2
  -7  12  -4 -6.3449 10.8973   3
   8 -12   4  6.2646 12.4472   1
  -8 -12  -4 -0.1496 10.8428   2
  -8  12  -4  3.1682 11.8334   3
  27   0  -5 10.0345 11.8445   1
  26   0  -5 -6.5060 12.1160   1
  25   0  -5 16.9416 12.4421   1
  24   0  -5 13.3600 11.3506   1
 -23   0   5 14.7917  9.7945   2
  23   0  -5  3.4012 10.2158   1
  22   0  -5 -2.6909  8.2372   1
 -22   0   5 0.61201 7.41022   2
 -21   0   5 23.1965  9.6133   2
  21   0  -5 13.7114 10.5400   1
 -20   0   5 17.7145  9.2052   2
  20   0  -5 8.68155 8.58581   1
 -19   0   5 -1.4318  7.7674   2
  19   0  -5 15.6745  8.3376   1
 -18   0   5 3.32956 8.73521   2
  18   0  -5 0.85678 6.38629   1
 -17   0   5 22.8223  9.0771   2
  17   0  -5 25.8621  9.3311   1
  16   0  -5 2.29570 6.87036   1
 -16   0   5 -7.8749  7.1397   2
 -15   0   5 23.8803  8.1502   2
  15   0  -5 19.7426  7.7346   1
  14   0  -5 7.34984 5.80255   1
 -14   0   5 -9.7617  5.5414   2
  13   0  -5 545.376  25.325   1
 -13   0   5 486.830  24.430   2
 -12   0   5 -5.6694  5.0544   2
  12   0  -5 0.77217 4.10513   1
 -11   0   5 1245.53   41.18   2
  11   0  -5 1238.72   40.81   1
  10   0  -5 2.10936 3.62218   1
  10   0  -5 -1.3406  2.5286   3
 -10   0   5 -4.4316  4.5299   2
  -9   0   5 1781.55   51.40   2
   9   0  -5 1783.46   48.35   3
   9   0  -5 1777.09   50.31   1
  -8   0   5 -2.4603  3.8820   2
   8   0  -5 0.68400 3.11233   1
   8   0  -5 -0.2785  2.5609   3
   7   0  -5 1027.31   29.45   3
   7   0  -5 1029.01   29.88   1
  -7   0   5 1000.31   31.51   2
  -6   0   5 -5.1769  2.9828   2
   6   0  -5 -0.3070  2.1423   1
   6   0  -5 1.40890 1.82738   3
   5   0  -5 8.22334 2.79217   3
   5   0  -5 7.61337 2.49855   1
  -4   0   5 5.71281 3.64591   2
   4   0  -5 2.55288 1.46863   1
   3   0  -5 2337.59   58.54   3
   3   0  -5 2482.30   55.96   1
  -3   0   5 2339.18   58.85   2
   2   0  -5 -3.4745  1.3567   3
  -2   0   5 -0.6694  1.7175   2
  -1   0   5 2721.48   64.69   2
   1   0  -5 2661.89   65.41   3
   0   0  -5 -0.7042  2.2972   3
   0   0   5 -0.8665  1.5352   1
   0   0   5 0.63130 1.66300   2
  -1   0  -5 1020.56   27.66   3
   1   0   5 992.293  26.390   2
   1   0   5 965.638  26.330   1
  -2   0  -5 -0.6636  1.7452   2
   2   0   5 -2.3246  2.2532   1
  -2   0  -5 0.31964 3.20530   3
  -3   0  -5 -1.4326  1.8436   2
  -3   0  -5 1.30230 3.02730   3
   3   0   5 -2.4339  2.5638   1
   4   0   5 -4.8253  2.8040   1
  -4   0  -5 -1.2917  1.8018   2
  -4   0  -5 -3.5778  3.1874   3
   5   0   5 1.00322 2.83044   1
  -5   0  -5 5.82513 3.32285   3
  -5   0  -5 -1.8492  1.9954   2
  -6   0  -5 -2.6189  2.8553   3
   6   0   5 2.98038 3.88314   1
  -6   0  -5 1.15037 2.82615   2
  -7   0  -5 107.594   8.397   3
  -7   0  -5 134.574   8.530   2
   7   0   5 119.149  12.092   1
  -8   0  -5 -0.1213  2.7995   2
  -8   0  -5 -2.0002  4.2733   3
   8   0   5 -4.5935  4.4851   1
  -9   0  -5 987.484  32.160   3
  -9   0  -5 1004.20   31.70   2
   9   0   5 1020.27   37.24   1
 -10   0  -5 -1.5646  3.1693   2
 -10   0  -5 -2.4719  4.3590   3
  10   0   5 -5.0494  3.9752   1
 -11   0  -5 462.723  19.686   2
 -11   0  -5 419.578  19.481   3
  11   0   5 423.838  24.055   1
  12   0   5 3.75536 5.89381   1
 -12   0  -5 0.32543 5.52682   3
 -12   0  -5 1.96866 4.71846   2
 -13   0  -5 528.373  22.995   3
  13   0   5 426.765  26.387   1
 -13   0  -5 505.772  22.605   2
 -14   0  -5 -4.2591  4.1652   2
  14   0   5 -3.1842  5.6063   1
 -14   0  -5 6.86043 6.55778   3
  15   0   5 128.989  17.942   1
 -15   0  -5 168.546  16.203   3
 -15   0  -5 158.478  15.830   2
 -16   0  -5 -11.490   6.290   3
 -16   0  -5 6.51316 6.93906   2
  16   0   5 3.96596 7.75143   1
  17   0   5 136.137  19.577   1
  18   0   5 -11.811   7.016   1
  19   0   5 31.5839 12.1722   1
  20   0   5  3.5001 10.6037   1
  21   0   5 2.85846 9.30050   1
  22   0   5 -4.9203  8.9499   1
  23   0   5  7.4550 10.1483   1
  24   0   5 11.3215 12.2566   1
  25   0   5 16.4109 13.0958   1
  27  -1  -5  5.7074 10.4567   1
  27   1  -5 -4.1533  8.8757   1
  26  -1  -5 -6.8336 11.3405   1
  26   1  -5 -0.2373 10.9895   1
 -25  -1   5 26.4151 11.6344   2
  25  -1  -5 19.1285 14.5346   1
  25   1  -5 15.4388 12.2634   1
  24  -1  -5 -5.2603  8.5704   1
 -24  -1   5 18.5905 11.1374   2
  24   1  -5  8.7453 10.2237   1
  23  -1  -5 24.7907 12.3025   1
 -23  -1   5 36.5937 12.8797   2
  23   1  -5 22.0743 11.7386   1
  22  -1  -5 2.07046 7.43072   1
 -22  -1   5 2.51202 7.91364   2
  22   1  -5 6.79579 9.22244   1
  21  -1  -5 102.029  17.836   1
 -21  -1   5 88.4453 16.1593   2
 -21   1   5 87.4619 15.9762   2
  21   1  -5 106.460  18.907   1
 -20  -1   5 16.0339  8.8041   2
  20  -1  -5 1.69058 7.25845   1
  20   1  -5 -3.5376  9.1320   1
 -20   1   5 7.28648 8.56155   2
  19  -1  -5 202.009  22.807   1
 -19  -1   5 226.670  23.035   2
  19   1  -5 245.267  25.327   1
 -19   1   5 187.387  19.831   2
 -18  -1   5 16.8867  9.5787   2
  18  -1  -5 36.9577 11.0135   1
 -18   1   5 22.2620  8.2307   3
 -18   1   5 9.46078 8.10253   2
  18   1  -5 32.3132 11.5291   1
  17  -1  -5 299.628  21.535   1
 -17  -1   5 249.969  23.111   2
  17   1  -5 284.797  21.501   1
 -17   1   5 272.685  19.426   2
 -17   1   5 276.817  18.606   3
 -16  -1   5 6.21102 7.90027   2
  16  -1  -5 -4.3361  4.8070   1
  16   1  -5 3.25976 6.37120   1
 -16   1   5 -2.0637  5.9092   2
  15  -1  -5 203.702  19.750   1
 -15  -1   5 212.279  19.724   2
  15   1  -5 185.071  19.018   1
 -15   1   5 201.206  18.793   2
 -14  -1   5 9.23129 6.54756   2
  14  -1  -5 20.0658  7.2357   1
 -14   1   5 13.3212  7.7659   2
  14   1  -5 20.4464  8.4086   1
 -13  -1   5 311.893  19.268   2
  13  -1  -5 315.325  18.805   1
 -13   1   5 294.016  18.157   2
  13   1  -5 309.410  18.827   1
 -12  -1   5 30.0922  8.1029   2
  12  -1  -5 21.9213  7.0214   1
 -12   1   5 26.8032  7.0756   2
  12   1  -5 21.1431  6.4164   1
 -11  -1   5 227.348  15.392   2
  11  -1  -5 174.167  12.978   1
 -11   1   5 217.657  13.624   2
  11   1  -5 212.324  13.611   1
 -10  -1   5 18.6657  6.5222   2
  10  -1  -5 20.9986  5.3039   3
  10  -1  -5 28.2509  6.5310   1
  10   1  -5 23.0456  5.8109   1
 -10   1   5 17.3630  5.6852   2
  10   1  -5 19.2510  4.0912   3
   9  -1  -5 44.2523  6.5896   3
  -9  -1   5 30.6732  7.3102   2
   9  -1  -5 33.7326  6.5417   1
   9   1  -5 33.2557  4.5639   3
  -9   1   5 37.1072  7.0407   2
   9   1  -5 43.1676  6.4889   1
   8  -1  -5 0.08092 3.31690   1
   8  -1  -5 10.8672  3.9936   3
  -8  -1   5 -0.0573  4.6035   2
  -8   1   5 9.16358 4.32544   2
   8   1  -5 11.1450  3.6677   1
   7  -1  -5 32.2675  5.1982   1
  -7  -1   5 10.7760  5.0273   2
   7  -1  -5 22.2619  4.5737   3
   7   1  -5 15.5204  4.1001   1
   7   1  -5 16.9203  3.0565   3
  -7   1   5 23.0748  5.3292   2
  -6  -1   5 1.33585 4.00061   2
   6  -1  -5 2.63074 2.25928   1
   6  -1  -5 4.98415 3.00988   3
   6   1  -5 1.54630 1.73843   3
  -6   1   5 -3.7247  2.5292   2
   6   1  -5 1.50126 2.69194   1
  -5  -1   5 191.960  10.881   2
   5  -1  -5 172.367   9.131   3
  -5  -1   5 169.993   9.184   1
   5  -1  -5 192.440   8.233   1
   5   1  -5 189.733   9.032   1
  -5   1   5 193.485   9.601   2
   5   1  -5 182.008   7.637   3
  -4  -1   5 85.6764  5.7887   1
  -4  -1   5 92.7513  8.2139   2
   4  -1  -5 96.4576  6.4481   3
   4   1  -5 88.3984  5.1358   3
  -4   1   5 90.8301  6.1777   2
   4   1  -5 90.9132  5.8716   1
  -3  -1   5 544.581  17.194   1
  -3  -1   5 527.844  17.795   2
   3  -1  -5 535.830  17.627   3
   3   1  -5 536.050  16.211   3
  -3   1   5 543.308  17.293   2
  -2  -1   5 -0.1729  2.0618   1
   2  -1  -5 -0.6912  1.6951   3
  -2  -1   5 0.94852 3.28344   2
   2   1  -5 -1.8102  2.7207   3
  -2   1   5 1.44058 1.83102   2
   1  -1  -5 5051.82  119.99   3
  -1  -1   5 5097.12  118.16   2
  -1  -1   5 5033.49  117.88   1
  -1   1   5 5089.80  119.38   2
   1   1  -5 5188.70  119.44   3
   0  -1  -5 304.194  11.574   3
   0  -1   5 305.235  10.389   2
   0  -1   5 301.870  11.741   1
   0   1   5 321.401  11.974   2
   0   1  -5 310.521  11.889   3
  -1  -1  -5 9722.68  226.25   3
   1  -1   5 9829.90  223.06   1
  -1  -1  -5 9822.42  225.81   2
   1  -1   5 9999.99  222.56   2
  -1   1  -5 9666.44  226.71   3
   1   1   5 9923.48  221.33   1
  -2  -1  -5 756.819  22.342   3
   2  -1   5 765.140  19.824   2
   2  -1   5 776.217  23.482   1
  -2  -1  -5 767.134  23.182   2
  -2   1  -5 709.263  23.124   3
   2   1   5 779.036  22.745   1
  -3  -1  -5 978.540  29.042   2
  -3  -1  -5 995.414  27.903   3
   3  -1   5 976.394  29.529   1
   3  -1   5 1035.39   25.33   2
   3   1   5 1001.78   29.24   1
  -3   1  -5 938.515  29.024   3
  -4  -1  -5 43.7360  5.6442   2
   4  -1   5 29.7404  5.3997   1
  -4  -1  -5 44.8283  5.4373   3
  -4   1  -5 33.5357  3.3697   2
   4   1   5 48.2655  6.6091   1
  -4   1  -5 47.7251  6.4300   3
   5  -1   5 2285.99   61.42   1
  -5  -1  -5 2308.64   58.26   3
  -5  -1  -5 2341.71   60.25   2
  -5   1  -5 2320.03   55.65   2
  -5   1  -5 2275.00   60.69   3
   5   1   5 2273.00   61.60   1
  -6  -1  -5 257.871  11.289   3
  -6  -1  -5 240.382  12.457   2
   6  -1   5 233.083  13.544   1
  -6   1  -5 261.188   9.837   2
   6   1   5 224.764  13.704   1
  -6   1  -5 228.771  12.589   3
  -7  -1  -5 3154.48   79.19   3
   7  -1   5 3081.37   83.96   1
  -7  -1  -5 3218.08   81.96   2
  -7   1  -5 3205.70   77.22   2
   7   1   5 3236.93   85.25   1
  -7   1  -5 3266.03   82.90   3
  -8  -1  -5 7.21244 3.81603   3
  -8  -1  -5 12.9197  4.7723   2
   8  -1   5 10.0837  4.9094   1
   8   1   5 2.99644 4.77548   1
  -8   1  -5 5.15624 5.31716   3
  -8   1  -5 8.84113 3.06643   2
   9  -1   5 191.871  14.199   1
  -9  -1  -5 183.389  10.681   3
  -9  -1  -5 205.303  12.708   2
   9   1   5 199.031  15.041   1
  -9   1  -5 176.456  12.297   3
  -9   1  -5 188.784  10.043   2
 -10  -1  -5 19.4942  5.3204   3
  10  -1   5 7.73152 5.21170   1
 -10  -1  -5 4.70978 3.89986   2
 -10   1  -5 14.1088  5.9105   3
  10   1   5 9.57477 5.78702   1
 -11  -1  -5 22.6602  5.9494   2
 -11  -1  -5 19.1803  5.9021   3
  11  -1   5 23.9825  7.3317   1
  11   1   5 6.56893 6.56806   1
 -11   1  -5 18.6924  6.7796   3
 -11   1  -5 18.2105  4.7927   2
 -12  -1  -5 18.8250  6.3702   3
  12  -1   5 0.81583 5.43503   1
 -12  -1  -5 4.97289 4.88599   2
  12   1   5 7.50134 6.31495   1
 -12   1  -5 -1.2690  6.1687   3
 -12   1  -5 6.07079 4.46105   2
  13  -1   5 7.70735 5.37569   1
 -13  -1  -5 -0.2213  4.5984   2
 -13  -1  -5 -3.8313  4.5180   3
 -13   1  -5 -3.2693  3.8161   2
 -13   1  -5 -4.0210  5.8193   3
  13   1   5 13.3344  7.5262   1
  14  -1   5 7.40200 6.97591   1
 -14  -1  -5 5.03809 5.51764   3
 -14  -1  -5 -0.6635  5.1877   2
  14   1   5 -3.8885  6.0360   1
 -14   1  -5 -4.6225  5.6962   3
 -15  -1  -5 10.1621  7.2044   2
  15  -1   5 -6.6038  6.1081   1
 -15   1  -5 1.28882 7.43202   3
  15   1   5 1.75122 7.43959   1
 -16  -1  -5 -0.2263  6.6045   2
  16  -1   5 14.1880  8.1179   1
  16   1   5 7.29179 9.42523   1
 -16   1  -5 0.77094 7.63756   3
  17  -1   5 8.70025 7.91000   1
 -17  -1  -5 14.5344  7.9546   2
 -17   1  -5 18.2620  9.3323   3
  17   1   5 20.8685 11.8137   1
  18  -1   5 -2.2617  7.3887   1
 -18  -1  -5 3.90884 7.11902   2
  18   1   5 2.17703 9.87289   1
  19  -1   5 26.1928 10.5064   1
  19   1   5 11.4348 10.4348   1
  20  -1   5 6.42670 7.64928   1
  20   1   5 -0.3377  8.6486   1
  21  -1   5 21.3854 11.5002   1
  21   1   5 20.8963 12.2777   1
  22  -1   5 -3.5529  8.4482   1
  22   1   5 -5.2468  8.3387   1
  23  -1   5 32.9107 14.0522   1
  23   1   5 24.2115 14.7648   1
  24  -1   5 7.74328 9.97688   1
  24   1   5 -3.4250 10.5267   1
  25  -1   5 1.57121 9.68762   1
  25   1   5 33.7086 17.8666   1
 -27  -2   5  2.6034 11.5042   2
  27  -2  -5 13.2656 12.4441   1
  27   2  -5 31.4000 17.0161   1
 -26  -2   5 13.1069 12.3771   2
  26  -2  -5  1.3142 10.0635   1
  26   2  -5 -2.9140 12.7646   1
 -25  -2   5 14.8138 10.9134   2
  25  -2  -5 -0.4529 10.0652   1
  25   2  -5  4.1964 10.3545   1
  24  -2  -5 15.6949 10.1233   1
 -24  -2   5 7.76235 9.71871   2
  24   2  -5 -8.2238  9.0481   1
  23  -2  -5 7.81483 8.88305   1
 -23  -2   5  9.4224 10.0727   2
  23   2  -5 -0.1548 10.0338   1
 -22  -2   5 1.34779 8.85788   2
  22  -2  -5 2.47654 6.89217   1
  22   2  -5 -8.3770  7.6423   1
  21  -2  -5 -1.3250  8.2932   1
 -21  -2   5 -0.6126  7.5814   2
  21   2  -5 12.2013  9.7381   1
  20  -2  -5 -7.3834  5.6312   1
 -20  -2   5 32.3916 12.7339   2
 -20   2   5 8.92705 8.13367   3
  20   2  -5 15.1801 10.8630   1
  19  -2  -5 6.00679 7.21651   1
 -19  -2   5 33.5054 11.3539   2
 -19   2   5 15.0261  8.1321   3
  19   2  -5 23.8053 11.8790   1
 -19   2   5 13.8954  8.1586   2
 -18  -2   5 9.63768 9.11829   2
  18  -2  -5 -4.6950  5.8006   1
 -18   2   5 0.36340 7.12571   2
 -18   2   5 5.97826 7.08452   3
  18   2  -5 7.78758 9.22677   1
 -17  -2   5 39.2029 11.3280   2
  17  -2  -5 10.3998  8.1766   1
 -17   2   5 32.3740 10.1516   2
  17   2  -5 39.4753 10.9945   1
  16  -2  -5 18.8821  7.7700   1
 -16  -2   5 15.0409  8.1457   2
  16   2  -5 3.85848 7.16676   1
 -16   2   5 16.0767  8.6692   2
  15  -2  -5 169.659  18.586   1
 -15  -2   5 184.610  19.279   2
  15   2  -5 202.778  19.260   1
 -15   2   5 187.898  17.200   2
  14  -2  -5 5.93028 6.45747   1
 -14  -2   5 10.2944  7.4396   2
 -14   2   5 27.7280  8.1736   2
  14   2  -5 12.3635  6.5624   1
  13  -2  -5 208.354  18.429   1
 -13  -2   5 233.018  20.380   2
 -13   2   5 228.840  15.425   2
  13   2  -5 261.172  16.687   1
 -12  -2   5 205.145  18.770   2
  12  -2  -5 186.970  14.161   1
  12   2  -5 186.557  13.614   1
 -12   2   5 225.123  14.393   2
 -11  -2   5 716.280  29.735   2
  11  -2  -5 698.736  27.142   1
 -11   2   5 640.665  24.879   2
  11   2  -5 669.514  26.651   1
  10  -2  -5 822.170  29.320   1
 -10  -2   5 839.049  32.481   2
  10   2  -5 865.926  30.123   1
  10   2  -5 848.619  23.433   3
 -10   2   5 827.988  28.467   2
  -9  -2   5 625.960  25.905   2
   9  -2  -5 572.282  21.940   1
   9  -2  -5 616.043  24.541   3
  -9   2   5 611.705  22.187   2
   9   2  -5 604.256  23.034   1
   9   2  -5 579.091  17.309   3
   8  -2  -5 1675.63   45.80   1
  -8  -2   5 1666.62   50.63   2
   8  -2  -5 1719.34   49.63   3
   8   2  -5 1671.73   41.52   3
  -8   2   5 1633.35   46.00   2
   8   2  -5 1692.87   47.25   1
  -7  -2   5 956.091  30.920   1
  -7  -2   5 923.673  32.557   2
   7  -2  -5 970.717  28.318   1
   7  -2  -5 933.037  31.530   3
   7   2  -5 963.474  25.082   3
   7   2  -5 973.998  30.103   1
  -7   2   5 950.822  29.038   2
   6  -2  -5 818.159  23.386   1
  -6  -2   5 765.929  26.305   1
   6  -2  -5 736.384  26.567   3
  -6  -2   5 786.664  28.120   2
   6   2  -5 799.112  26.047   1
  -6   2   5 810.620  24.886   2
   6   2  -5 835.066  21.656   3
   5  -2  -5 921.125  29.436   3
  -5  -2   5 923.644  28.746   1
  -5  -2   5 926.297  30.109   2
   5  -2  -5 940.510  25.004   1
   5   2  -5 925.246  24.484   3
   5   2  -5 905.051  28.517   1
  -5   2   5 890.612  27.038   2
   4  -2  -5 134.484   5.849   1
  -4  -2   5 118.171   8.143   1
   4  -2  -5 125.910   8.389   3
  -4  -2   5 119.617   8.957   2
  -4   2   5 121.810   7.291   2
   4   2  -5 122.758   6.307   3
  -3  -2   5 985.388  29.420   2
   3  -2  -5 935.951  28.972   3
  -3  -2   5 981.525  29.304   1
   3   2  -5 951.777  26.015   3
  -3   2   5 934.388  27.653   2
  -2  -2   5 25.8476  4.9395   1
   2  -2  -5 19.6979  3.9105   3
  -2  -2   5 18.2860  4.7003   2
  -2   2   5 26.2113  4.1546   2
   2   2  -5 22.2431  4.1696   3
   1  -2  -5 1952.72   44.59   1
  -1  -2   5 1838.76   47.45   2
  -1  -2   5 1901.04   49.46   1
   1  -2  -5 1820.75   48.61   3
   1   2  -5 1799.76   47.54   3
  -1   2   5 1841.60   48.79   2
   0  -2  -5 11.7659  3.4627   2
   0  -2   5 21.2350  4.3220   1
   0  -2  -5 7.66080 3.12976   3
   0  -2   5 15.4785  3.4189   2
   0   2  -5 17.3770  4.1009   3
   0   2   5 11.4661  2.1554   1
  -1  -2  -5 25.9162  4.7459   2
   1  -2   5 33.7198  3.8718   2
  -1  -2  -5 29.8642  4.5354   3
   1  -2   5 26.0610  4.7762   1
   1   2   5 32.0359  3.7898   1
  -1   2  -5 33.0300  5.3579   3
  -2  -2  -5 141.672   8.779   2
  -2  -2  -5 142.963   7.509   3
   2  -2   5 141.986   9.033   1
   2   2   5 146.668   7.553   1
  -2   2  -5 127.320   8.719   3
  -3  -2  -5 2.82183 2.30200   3
  -3  -2  -5 -0.4472  2.3101   2
   3  -2   5 1.49116 2.56337   1
  -3   2  -5 -2.0355  3.0175   3
   3   2   5 -0.8878  1.8294   1
  -4  -2  -5 27.3724  5.5337   2
   4  -2   5 18.9982  5.0329   1
  -4  -2  -5 17.6131  3.8035   3
  -4   2  -5 25.9048  5.5924   3
   4   2   5 33.2326  5.5020   1
  -5  -2  -5 179.787  11.126   2
   5  -2   5 192.743  11.934   1
  -5  -2  -5 194.610   9.180   3
   5   2   5 172.908  11.073   1
  -5   2  -5 177.398  11.488   3
  -6  -2  -5 176.749   8.831   3
   6  -2   5 183.625  12.192   1
  -6  -2  -5 147.461  10.530   2
  -6   2  -5 154.445  11.159   3
   6   2   5 176.577  12.170   1
  -7  -2  -5 139.304   8.148   3
   7  -2   5 159.352  13.932   1
  -7  -2  -5 159.673  11.165   2
  -7   2  -5 151.838  11.429   3
  -7   2  -5 154.822   6.147   2
   7   2   5 167.381  12.631   1
   8  -2   5 219.657  14.559   1
  -8  -2  -5 224.720  13.867   2
  -8  -2  -5 215.326  10.601   3
  -8   2  -5 215.134   8.327   2
  -8   2  -5 225.906  14.147   3
   8   2   5 195.880  14.246   1
   9  -2   5 309.726  18.435   1
  -9  -2  -5 330.694  17.943   2
  -9  -2  -5 326.354  13.817   3
   9   2   5 337.407  19.835   1
  -9   2  -5 349.087  12.053   2
  -9   2  -5 342.620  18.229   3
  10  -2   5 79.6207 11.4897   1
 -10  -2  -5 94.5201 11.9489   2
 -10  -2  -5 88.9390  8.4091   3
  10   2   5 102.485  13.269   1
 -10   2  -5 83.2766 11.4159   3
 -10   2  -5 79.1107  6.1052   2
  11  -2   5 471.576  24.784   1
 -11  -2  -5 453.751  22.678   2
 -11  -2  -5 447.923  17.630   3
  11   2   5 479.589  25.587   1
 -11   2  -5 464.725  23.397   3
  12  -2   5 50.9942 10.3596   1
 -12  -2  -5 50.2309  7.2025   3
 -12  -2  -5 47.2938  9.5593   2
 -12   2  -5 28.0078  9.3236   3
  12   2   5 34.2067 10.1161   1
  13  -2   5 323.116  22.140   1
 -13  -2  -5 310.168  19.307   2
  13   2   5 337.950  23.092   1
 -13   2  -5 311.195  20.435   3
 -14  -2  -5 63.4745 11.8475   2
  14  -2   5 69.1075 12.8053   1
 -14   2  -5 73.9225 12.2435   3
  14   2   5 53.0453 12.9122   1
  15  -2   5 209.406  22.425   1
 -15  -2  -5 248.736  22.004   2
 -15   2  -5 211.299  20.154   3
  15   2   5 194.593  21.894   1
 -16  -2  -5 11.1437  8.3641   2
  16  -2   5 14.6360  8.9677   1
 -16   2  -5 20.1282 10.3077   3
  16   2   5 5.64738 8.46819   1
  17  -2   5 96.9644 17.2975   1
 -17  -2  -5 135.427  17.257   2
 -17   2  -5 124.844  17.327   3
  17   2   5 107.746  18.106   1
 -18  -2  -5 5.51806 7.68067   2
  18  -2   5 24.8226 10.0643   1
 -18   2  -5 11.0824  9.8301   3
  18   2   5 13.2418 11.2617   1
  19  -2   5 48.0046 13.4902   1
 -19  -2  -5 91.3564 16.2368   2
  19   2   5 63.0324 15.6243   1
 -19   2  -5 55.2815 12.7978   3
  20  -2   5 11.6279  9.8865   1
 -20  -2  -5 1.01752 8.91844   2
  20   2   5  7.1201 11.3316   1
  21  -2   5 20.9726 10.4825   1
  21   2   5 19.1947 12.1768   1
  22  -2   5 21.2724 10.4639   1
  22   2   5  5.4776 12.1100   1
  23  -2   5 -1.1893  9.3389   1
  23   2   5 -3.8907 11.3015   1
  24  -2   5 17.9416 12.4696   1
  24   2   5 -8.1179 11.8309   1
  25  -2   5 -1.0107 10.2446   1
  25   2   5 -0.5852 12.0102   1
  27  -3  -5  9.3368 12.3723   1
 -27  -3   5  1.5789 11.8048   2
[truncated: 1,022,702 more chars]
