# Supplementary material for: The Coordination and Luminescence of the Eu(III) Complexes with the Polymers (PMMA, PVP)
Source: Polymers (Basel). 2018 May 7;10(5):508. doi: 10.3390/polym10050508 (PMC6415368; doi:10.3390/polym10050508)
Supplement: Supplementary file 1 [file polymers-10-00508-s001.zip › CCDC 1524434-Complex 2.cif]

 
data_HDS161202_0m
 
_audit_creation_method            'SHELXL-2014/7'
_shelx_SHELXL_version_number      '2014/7'
_chemical_name_systematic         
 'Eu[2-(2,2,2-trifluoroethyl)-1- tetralone]3Bipyridine n-hexzne solvate'
_chemical_name_common             ?
_chemical_melting_point           ?
_chemical_formula_moiety          
 'C46 H32 Eu F9 N2 O6, 0.5(C6H14)'
_chemical_formula_sum
 'C49 H39 Eu F9 N2 O6' 
_chemical_formula_weight          1074.78

loop_
 _atom_type_symbol
 _atom_type_description
 _atom_type_scat_dispersion_real
 _atom_type_scat_dispersion_imag
 _atom_type_scat_source
 'C'  'C'   0.0033   0.0016
 'International Tables Vol C Tables 4.2.6.8 and 6.1.1.4'
 'H'  'H'   0.0000   0.0000
 'International Tables Vol C Tables 4.2.6.8 and 6.1.1.4'
 'N'  'N'   0.0061   0.0033
 'International Tables Vol C Tables 4.2.6.8 and 6.1.1.4'
 'O'  'O'   0.0106   0.0060
 'International Tables Vol C Tables 4.2.6.8 and 6.1.1.4'
 'F'  'F'   0.0171   0.0103
 'International Tables Vol C Tables 4.2.6.8 and 6.1.1.4'
 'Eu'  'Eu'  -0.1578   3.6682
 'International Tables Vol C Tables 4.2.6.8 and 6.1.1.4'
 
_space_group_crystal_system       monoclinic
_space_group_IT_number            14
_space_group_name_H-M_alt         'P 21/c'
_space_group_name_Hall            '-P 2ybc'
 
_shelx_space_group_comment
;
The symmetry employed for this shelxl refinement is uniquely defined
by the following loop, which should always be used as a source of
symmetry information in preference to the above space-group names.
They are only intended as comments.
;
 
loop_
 _space_group_symop_operation_xyz
 'x, y, z'
 '-x, y+1/2, -z+1/2'
 '-x, -y, -z'
 'x, -y-1/2, z-1/2'
 
_cell_length_a                    12.0336(16)
_cell_length_b                    21.134(3)
_cell_length_c                    19.0963(17)
_cell_angle_alpha                 90
_cell_angle_beta                  110.757(6)
_cell_angle_gamma                 90
_cell_volume                      4541.3(10)
_cell_formula_units_Z             4
_cell_measurement_temperature     296(2)
_cell_measurement_reflns_used     7631
_cell_measurement_theta_min       2.2395
_cell_measurement_theta_max       23.0094
 
_exptl_crystal_description        block
_exptl_crystal_colour             yellow
_exptl_crystal_density_meas       ?
_exptl_crystal_density_method     'not measured'
_exptl_crystal_density_diffrn     1.572          
_exptl_crystal_F_000              2156
_exptl_transmission_factor_min    ?
_exptl_transmission_factor_max    ?
_exptl_crystal_size_max           0.28
_exptl_crystal_size_mid           0.26
_exptl_crystal_size_min           0.18
_exptl_absorpt_coefficient_mu     1.470
_shelx_estimated_absorpt_T_min    ?
_shelx_estimated_absorpt_T_max    ?
_exptl_absorpt_correction_type    'multi-scan'
_exptl_absorpt_correction_T_min   0.96004
_exptl_absorpt_correction_T_max   1.00000
_exptl_absorpt_process_details    
;
CrysAlisPro, Agilent Technologies,
Version 1.171.35.21 (release 20-01-2012 CrysAlis171 .NET)
(compiled Jan 23 2012,18:06:46)
Empirical absorption correction using spherical harmonics,
 implemented in SCALE3 ABSPACK scaling algorithm.
; 
_exptl_absorpt_special_details    
; 
 ? 
; 

_diffrn_ambient_temperature       296(2)
_diffrn_radiation_wavelength      0.71073
_diffrn_radiation_type            MoK\a
_diffrn_source                    'fine-focus sealed tube'
_diffrn_measurement_device_type   'Xcalibur, Eos'
_diffrn_measurement_method         '\w scans'
_diffrn_detector_area_resol_mean  ?
_diffrn_reflns_number             33396
_diffrn_reflns_av_unetI/netI      0.0618
_diffrn_reflns_av_R_equivalents   0.0506
_diffrn_reflns_limit_h_min        -12
_diffrn_reflns_limit_h_max        15
_diffrn_reflns_limit_k_min        -28
_diffrn_reflns_limit_k_max        27
_diffrn_reflns_limit_l_min        -24
_diffrn_reflns_limit_l_max        24
_diffrn_reflns_theta_min          2.240
_diffrn_reflns_theta_max          28.164
_diffrn_reflns_theta_full         25.242
_diffrn_measured_fraction_theta_max   0.990
_diffrn_measured_fraction_theta_full  0.996
_diffrn_reflns_Laue_measured_fraction_max    0.990
_diffrn_reflns_Laue_measured_fraction_full   0.996
_diffrn_reflns_point_group_measured_fraction_max   0.990
_diffrn_reflns_point_group_measured_fraction_full  0.996
_reflns_number_total              11028
_reflns_number_gt                 7033
_reflns_threshold_expression      'I > 2\s(I)'
_reflns_Friedel_coverage          0.000
_reflns_Friedel_fraction_max      .
_reflns_Friedel_fraction_full     .
 
_reflns_special_details
;
 Reflections were merged by SHELXL according to the crystal
 class for the calculation of statistics and refinement.
 
 _reflns_Friedel_fraction is defined as the number of unique
 Friedel pairs measured divided by the number that would be
 possible theoretically, ignoring centric projections and
 systematic absences.
;
 
_computing_data_collection        'APEX2'
_computing_cell_refinement        'SAINT'
_computing_data_reduction         'SAINT'
_computing_structure_solution     'SHELXL-2014/7 (Sheldrick, 2014)'
_computing_structure_refinement 'SHELXL-2014/7 (Sheldrick, 2014)'
_computing_molecular_graphics     'SHELXL-2014/7 (Sheldrick, 2014)'
_computing_publication_material   'SHELXL-2014/7 (Sheldrick, 2014)'
_refine_special_details           ?
_refine_ls_structure_factor_coef  Fsqd
_refine_ls_matrix_type            full
_refine_ls_weighting_scheme       calc
_refine_ls_weighting_details
'w=1/[\s^2^(Fo^2^)+(0.0457P)^2^+0.0457P] where P=(Fo^2^+2Fc^2^)/3'
_atom_sites_solution_primary      ?
_atom_sites_solution_secondary    ?
_atom_sites_solution_hydrogens    geom
_refine_ls_hydrogen_treatment     constr
_refine_ls_extinction_method      none
_refine_ls_extinction_coef        .
_refine_ls_number_reflns          11028
_refine_ls_number_parameters      605
_refine_ls_number_restraints      11
_refine_ls_R_factor_all           0.0828
_refine_ls_R_factor_gt            0.0430
_refine_ls_wR_factor_ref          0.1134
_refine_ls_wR_factor_gt           0.0961
_refine_ls_goodness_of_fit_ref    1.066
_refine_ls_restrained_S_all       1.082
_refine_ls_shift/su_max           0.003
_refine_ls_shift/su_mean          0.000
 
loop_
 _atom_site_label
 _atom_site_type_symbol
 _atom_site_fract_x
 _atom_site_fract_y
 _atom_site_fract_z
 _atom_site_U_iso_or_equiv
 _atom_site_adp_type
 _atom_site_occupancy
 _atom_site_site_symmetry_order  
 _atom_site_calc_flag
 _atom_site_refinement_flags_posn
 _atom_site_refinement_flags_adp
 _atom_site_refinement_flags_occupancy
 _atom_site_disorder_assembly
 _atom_site_disorder_group
C1 C 0.6442(5) 0.4232(2) 0.3696(3) 0.0791(14) Uani 1 1 d . . . . .
H1 H 0.7163 0.4128 0.4065 0.095 Uiso 1 1 calc R U . . .
C4 C 0.4320(6) 0.4555(3) 0.2609(4) 0.106(2) Uani 1 1 d . . . . .
H4 H 0.3600 0.4668 0.2245 0.127 Uiso 1 1 calc R U . . .
C5 C 0.4449(5) 0.3959(2) 0.2924(3) 0.0777(13) Uani 1 1 d . U . . .
C6 C 0.5526(4) 0.37993(19) 0.3481(2) 0.0588(10) Uani 1 1 d . . . . .
C7 C 0.5697(3) 0.31655(18) 0.3838(2) 0.0502(9) Uani 1 1 d . . . . .
C8 C 0.4876(4) 0.26773(19) 0.3495(2) 0.0592(11) Uani 1 1 d . . . . .
C9 C 0.3883(5) 0.2842(3) 0.2753(3) 0.0978(19) Uani 1 1 d . . . . .
H9A H 0.4171 0.2773 0.2344 0.117 Uiso 1 1 calc R U . . .
H9B H 0.3216 0.2559 0.2680 0.117 Uiso 1 1 calc R U . . .
C10 C 0.3476(5) 0.3495(3) 0.2728(3) 0.1081(19) Uani 1 1 d . U . . .
H10A H 0.3050 0.3541 0.3071 0.130 Uiso 1 1 calc R U . . .
H10B H 0.2924 0.3586 0.2227 0.130 Uiso 1 1 calc R U . . .
C11 C 0.5070(4) 0.2079(2) 0.3820(3) 0.0551(10) Uani 1 1 d . . . . .
C12 C 0.4175(5) 0.1539(3) 0.3455(3) 0.0819(14) Uani 1 1 d . . . . .
C13 C 0.9528(5) 0.3614(3) 0.3493(3) 0.0864(15) Uani 1 1 d . . . . .
H13 H 0.9238 0.3724 0.3868 0.104 Uiso 1 1 calc R U . . .
C14 C 0.9858(6) 0.4081(3) 0.3102(4) 0.111(2) Uani 1 1 d . . . . .
H14 H 0.9795 0.4506 0.3210 0.133 Uiso 1 1 calc R U . . .
C15 C 1.0279(6) 0.3910(4) 0.2553(4) 0.112(2) Uani 1 1 d . . . . .
H15 H 1.0511 0.4223 0.2292 0.135 Uiso 1 1 calc R U . . .
C16 C 1.0365(5) 0.3304(4) 0.2382(3) 0.0966(19) Uani 1 1 d . . . . .
H16 H 1.0632 0.3206 0.1994 0.116 Uiso 1 1 calc R U . . .
C17 C 1.0061(4) 0.2809(3) 0.2776(3) 0.0767(15) Uani 1 1 d . . . . .
C18 C 0.9623(4) 0.2987(2) 0.3333(2) 0.0634(11) Uani 1 1 d . . . . .
C19 C 0.9172(4) 0.2491(2) 0.3726(2) 0.0590(11) Uani 1 1 d . . . . .
C20 C 0.9431(4) 0.1845(2) 0.3654(2) 0.0625(11) Uani 1 1 d . . . . .
C21 C 1.0349(5) 0.1710(3) 0.3288(3) 0.0902(16) Uani 1 1 d . . . . .
H21A H 1.0295 0.1270 0.3136 0.108 Uiso 1 1 calc R U . . .
H21B H 1.1141 0.1784 0.3648 0.108 Uiso 1 1 calc R U . . .
C22 C 1.0134(5) 0.2137(3) 0.2605(3) 0.0899(17) Uani 1 1 d . . . . .
H22A H 1.0776 0.2078 0.2415 0.108 Uiso 1 1 calc R U . . .
H22B H 0.9400 0.2011 0.2214 0.108 Uiso 1 1 calc R U . . .
C23 C 0.8847(4) 0.1380(2) 0.3893(2) 0.0659(12) Uani 1 1 d . . . . .
C24 C 0.9015(6) 0.0694(3) 0.3723(4) 0.1015(19) Uani 1 1 d . U . . .
C25 C 1.1901(4) 0.1282(3) 0.5606(3) 0.0799(14) Uani 1 1 d . . . . .
H25 H 1.1268 0.1079 0.5682 0.096 Uiso 1 1 calc R U . . .
C26 C 1.2834(6) 0.0929(3) 0.5569(3) 0.106(2) Uani 1 1 d . . . . .
H26 H 1.2844 0.0491 0.5625 0.127 Uiso 1 1 calc R U . . .
C27 C 1.3764(6) 0.1241(5) 0.5447(4) 0.126(3) Uani 1 1 d . . . . .
H27 H 1.4406 0.1009 0.5421 0.152 Uiso 1 1 calc R U . . .
C28 C 1.3751(5) 0.1875(4) 0.5364(4) 0.110(2) Uani 1 1 d . . . . .
H28 H 1.4388 0.2072 0.5286 0.132 Uiso 1 1 calc R U . . .
C29 C 1.2810(4) 0.2239(3) 0.5393(3) 0.0840(16) Uani 1 1 d . . . . .
C30 C 1.1880(4) 0.1933(2) 0.5532(2) 0.0626(11) Uani 1 1 d . . . . .
C31 C 1.0851(4) 0.2303(2) 0.5561(2) 0.0561(10) Uani 1 1 d . . . . .
C32 C 1.0981(4) 0.2968(2) 0.5687(2) 0.0614(11) Uani 1 1 d . . . . .
C33 C 1.2190(4) 0.3253(3) 0.5773(3) 0.0907(16) Uani 1 1 d . . . . .
H33A H 1.2093 0.3700 0.5650 0.109 Uiso 1 1 calc R U . . .
H33B H 1.2717 0.3215 0.6291 0.109 Uiso 1 1 calc R U . . .
C34 C 1.2745(5) 0.2930(3) 0.5275(4) 0.106(2) Uani 1 1 d . . . . .
H34A H 1.2278 0.3020 0.4755 0.127 Uiso 1 1 calc R U . . .
H34B H 1.3538 0.3096 0.5378 0.127 Uiso 1 1 calc R U . . .
C35 C 1.0054(4) 0.3317(2) 0.5760(2) 0.0629(11) Uani 1 1 d . . . . .
C36 C 1.0254(6) 0.4002(3) 0.6029(4) 0.0971(18) Uani 1 1 d . . . . .
C37 C 0.7825(5) 0.0772(2) 0.5702(3) 0.0784(14) Uani 1 1 d . . . . .
H37 H 0.8149 0.0698 0.5333 0.094 Uiso 1 1 calc R U . . .
C38 C 0.7568(5) 0.0258(2) 0.6060(3) 0.0890(16) Uani 1 1 d . . . . .
H38 H 0.7706 -0.0151 0.5931 0.107 Uiso 1 1 calc R U . . .
C39 C 0.7111(5) 0.0359(3) 0.6601(3) 0.0947(17) Uani 1 1 d . . . . .
H39 H 0.6938 0.0021 0.6857 0.114 Uiso 1 1 calc R U . . .
C40 C 0.6905(5) 0.0979(2) 0.6769(3) 0.0792(14) Uani 1 1 d . . . . .
H40 H 0.6583 0.1058 0.7137 0.095 Uiso 1 1 calc R U . . .
C41 C 0.7175(4) 0.1474(2) 0.6393(2) 0.0569(10) Uani 1 1 d . . . . .
C42 C 0.6965(3) 0.2140(2) 0.6539(2) 0.0543(10) Uani 1 1 d . . . . .
C43 C 0.6673(4) 0.2326(2) 0.7149(3) 0.0707(13) Uani 1 1 d . . . . .
H43 H 0.6617 0.2024 0.7489 0.085 Uiso 1 1 calc R U . . .
C44 C 0.6467(5) 0.2949(3) 0.7254(3) 0.0856(15) Uani 1 1 d . . . . .
H44 H 0.6279 0.3074 0.7666 0.103 Uiso 1 1 calc R U . . .
C45 C 0.6541(4) 0.3386(2) 0.6744(3) 0.0799(15) Uani 1 1 d . . . . .
H45 H 0.6390 0.3812 0.6795 0.096 Uiso 1 1 calc R U . . .
C46 C 0.6847(4) 0.3175(2) 0.6146(3) 0.0670(12) Uani 1 1 d . . . . .
H46 H 0.6899 0.3471 0.5798 0.080 Uiso 1 1 calc R U . . .
Eu1 Eu 0.78703(2) 0.22679(2) 0.50004(2) 0.04751(8) Uani 1 1 d . . . . .
F1 F 0.3103(3) 0.16495(17) 0.3459(2) 0.1275(13) Uani 1 1 d . . . . .
F2 F 0.4074(3) 0.14444(15) 0.27392(19) 0.1111(11) Uani 1 1 d . . . . .
F3 F 0.4516(3) 0.09975(15) 0.3802(2) 0.1250(13) Uani 1 1 d . . . . .
F4 F 0.8709(4) 0.05534(18) 0.3015(2) 0.1548(17) Uani 1 1 d . . . . .
F5 F 1.0084(4) 0.04782(18) 0.4035(3) 0.1637(18) Uani 1 1 d . . . . .
F6 F 0.8349(5) 0.03107(18) 0.3959(3) 0.1765(19) Uani 1 1 d . U . . .
F7 F 1.1250(3) 0.40854(16) 0.6622(2) 0.1294(13) Uani 1 1 d . . . . .
F8 F 1.0337(4) 0.43895(15) 0.5506(3) 0.1474(15) Uani 1 1 d . . . . .
F9 F 0.9397(4) 0.42044(15) 0.6251(3) 0.1397(15) Uani 1 1 d . . . . .
N1 N 0.7637(3) 0.13724(16) 0.58529(19) 0.0584(9) Uani 1 1 d . . . . .
N2 N 0.7068(3) 0.25697(16) 0.60482(19) 0.0539(8) Uani 1 1 d . . . . .
O1 O 0.6589(2) 0.31030(12) 0.44339(15) 0.0573(7) Uani 1 1 d . . . . .
O2 O 0.5911(2) 0.18944(13) 0.43772(17) 0.0620(7) Uani 1 1 d . . . . .
O3 O 0.8109(3) 0.14457(13) 0.42329(17) 0.0680(8) Uani 1 1 d . . . . .
O4 O 0.8527(3) 0.26798(12) 0.40735(16) 0.0621(8) Uani 1 1 d . . . . .
O5 O 0.9003(2) 0.31369(13) 0.56356(15) 0.0595(7) Uani 1 1 d . . . . .
O6 O 0.9920(2) 0.19949(13) 0.55131(15) 0.0561(7) Uani 1 1 d . . . . .
C2 C 0.6284(7) 0.4824(3) 0.3361(4) 0.1030(19) Uani 1 1 d . . . . .
H2 H 0.6902 0.5116 0.3504 0.124 Uiso 1 1 calc R U . . .
C3 C 0.5231(8) 0.4979(3) 0.2824(4) 0.117(2) Uani 1 1 d . . . . .
H3 H 0.5131 0.5377 0.2603 0.141 Uiso 1 1 calc R U . . .
C3S C 0.5576(16) 0.4975(15) 0.5303(9) 0.305(18) Uani 1 1 d . . . . .
H3S1 H 0.5503 0.4944 0.5791 0.366 Uiso 1 1 calc DR U . . .
H3S2 H 0.6049 0.4626 0.5231 0.366 Uiso 1 1 calc DR U . . .
C1S C 0.7273(13) 0.5351(10) 0.5670(11) 0.386(14) Uani 1 1 d D . . . .
H1S1 H 0.7233 0.5099 0.6079 0.578 Uiso 1 1 calc DR U . . .
H1S2 H 0.7764 0.5714 0.5863 0.578 Uiso 1 1 calc R U . . .
H1S3 H 0.7606 0.5104 0.5371 0.578 Uiso 1 1 calc R U . . .
C2S C 0.6012(16) 0.5568(6) 0.5184(7) 0.296(10) Uani 1 1 d D . . . .
H2S1 H 0.5718 0.5920 0.5394 0.356 Uiso 1 1 calc R U . . .
H2S2 H 0.5915 0.5648 0.4665 0.356 Uiso 1 1 calc R U . . .
 
loop_
 _atom_site_aniso_label
 _atom_site_aniso_U_11
 _atom_site_aniso_U_22
 _atom_site_aniso_U_33
 _atom_site_aniso_U_23
 _atom_site_aniso_U_13
 _atom_site_aniso_U_12
C1 0.102(4) 0.054(3) 0.089(4) -0.003(3) 0.043(3) -0.004(3)
C4 0.125(5) 0.095(4) 0.097(5) 0.036(4) 0.040(4) 0.030(4)
C5 0.082(3) 0.082(3) 0.070(3) 0.011(3) 0.029(3) 0.009(3)
C6 0.069(3) 0.060(3) 0.055(3) 0.001(2) 0.032(2) 0.006(2)
C7 0.048(2) 0.060(2) 0.049(2) -0.005(2) 0.0247(19) -0.0015(19)
C8 0.050(2) 0.068(3) 0.054(3) -0.005(2) 0.0109(19) -0.004(2)
C9 0.076(4) 0.107(4) 0.085(4) -0.002(3) -0.004(3) -0.008(3)
C10 0.093(4) 0.118(5) 0.090(4) 0.019(4) 0.004(3) 0.011(3)
C11 0.046(2) 0.065(3) 0.059(3) -0.012(2) 0.025(2) -0.0126(19)
C12 0.074(4) 0.082(4) 0.084(4) -0.014(3) 0.022(3) -0.017(3)
C13 0.090(4) 0.095(4) 0.083(4) 0.012(3) 0.041(3) -0.006(3)
C14 0.115(5) 0.110(5) 0.126(6) 0.022(4) 0.066(4) -0.019(4)
C15 0.101(5) 0.141(6) 0.101(5) 0.029(5) 0.043(4) -0.021(5)
C16 0.068(3) 0.170(6) 0.062(3) 0.014(4) 0.035(3) -0.025(4)
C17 0.051(3) 0.135(5) 0.045(3) -0.002(3) 0.019(2) -0.011(3)
C18 0.054(2) 0.096(3) 0.045(2) 0.004(2) 0.023(2) -0.004(2)
C19 0.052(2) 0.085(3) 0.040(2) -0.006(2) 0.0163(19) -0.001(2)
C20 0.056(2) 0.085(3) 0.051(3) -0.013(2) 0.024(2) 0.000(2)
C21 0.076(3) 0.123(4) 0.083(4) -0.011(3) 0.044(3) 0.014(3)
C22 0.070(3) 0.154(5) 0.057(3) -0.017(3) 0.036(3) -0.002(3)
C23 0.068(3) 0.075(3) 0.053(3) -0.017(2) 0.020(2) 0.002(2)
C24 0.111(5) 0.092(4) 0.121(6) -0.027(4) 0.065(4) -0.004(4)
C25 0.071(3) 0.106(4) 0.060(3) -0.011(3) 0.019(2) 0.013(3)
C26 0.089(4) 0.114(5) 0.105(5) -0.020(4) 0.021(4) 0.028(4)
C27 0.080(5) 0.185(8) 0.103(5) -0.027(6) 0.018(4) 0.035(5)
C28 0.060(4) 0.174(7) 0.094(5) -0.012(5) 0.024(3) 0.003(4)
C29 0.051(3) 0.136(5) 0.061(3) -0.010(3) 0.015(2) -0.006(3)
C30 0.052(3) 0.086(3) 0.042(2) -0.004(2) 0.0077(19) 0.005(2)
C31 0.047(2) 0.079(3) 0.038(2) 0.003(2) 0.0101(17) -0.003(2)
C32 0.061(3) 0.069(3) 0.054(3) -0.001(2) 0.019(2) -0.014(2)
C33 0.072(3) 0.104(4) 0.095(4) -0.001(3) 0.027(3) -0.030(3)
C34 0.065(4) 0.155(6) 0.109(5) 0.001(5) 0.045(3) -0.029(4)
C35 0.067(3) 0.066(3) 0.053(3) -0.005(2) 0.018(2) -0.017(2)
C36 0.097(4) 0.070(4) 0.125(6) -0.009(4) 0.040(4) -0.023(3)
C37 0.109(4) 0.068(3) 0.071(3) 0.002(3) 0.046(3) 0.001(3)
C38 0.123(5) 0.062(3) 0.088(4) -0.004(3) 0.044(4) -0.010(3)
C39 0.123(5) 0.077(4) 0.099(4) 0.011(3) 0.057(4) -0.022(3)
C40 0.097(4) 0.079(3) 0.076(3) 0.003(3) 0.047(3) -0.019(3)
C41 0.057(2) 0.069(3) 0.050(2) 0.006(2) 0.025(2) -0.006(2)
C42 0.044(2) 0.072(3) 0.049(2) 0.003(2) 0.0177(18) -0.0056(19)
C43 0.076(3) 0.093(4) 0.055(3) 0.006(3) 0.038(2) -0.004(3)
C44 0.099(4) 0.105(4) 0.071(4) -0.011(3) 0.051(3) 0.006(3)
C45 0.097(4) 0.082(3) 0.077(4) -0.014(3) 0.051(3) 0.012(3)
C46 0.072(3) 0.076(3) 0.063(3) 0.003(2) 0.037(2) 0.004(2)
Eu1 0.04952(12) 0.05488(13) 0.04147(12) -0.00262(9) 0.02025(8) -0.00502(9)
F1 0.066(2) 0.158(3) 0.158(3) -0.022(3) 0.040(2) -0.041(2)
F2 0.127(3) 0.107(2) 0.087(2) -0.0426(19) 0.024(2) -0.034(2)
F3 0.125(3) 0.083(2) 0.140(3) 0.003(2) 0.014(2) -0.048(2)
F4 0.211(4) 0.129(3) 0.116(3) -0.071(3) 0.048(3) 0.007(3)
F5 0.168(4) 0.120(3) 0.182(4) -0.020(3) 0.035(3) 0.064(3)
F6 0.248(5) 0.090(2) 0.251(5) -0.045(3) 0.161(4) -0.017(3)
F7 0.138(3) 0.104(2) 0.130(3) -0.046(2) 0.027(3) -0.051(2)
F8 0.199(4) 0.074(2) 0.164(4) 0.027(2) 0.058(3) -0.030(2)
F9 0.138(3) 0.083(2) 0.215(5) -0.057(3) 0.084(3) -0.026(2)
N1 0.067(2) 0.057(2) 0.055(2) 0.0039(17) 0.0271(18) -0.0030(17)
N2 0.058(2) 0.061(2) 0.049(2) -0.0002(16) 0.0273(17) -0.0008(16)
O1 0.0566(16) 0.0558(16) 0.0563(18) -0.0052(14) 0.0161(14) -0.0009(13)
O2 0.0502(16) 0.0628(18) 0.069(2) 0.0033(15) 0.0163(15) -0.0059(14)
O3 0.0725(19) 0.0695(18) 0.071(2) -0.0190(16) 0.0371(17) -0.0119(15)
O4 0.076(2) 0.0715(19) 0.0535(17) 0.0073(14) 0.0417(16) 0.0084(15)
O5 0.0572(17) 0.0653(18) 0.0579(18) -0.0097(14) 0.0229(14) -0.0119(14)
O6 0.0510(16) 0.0624(16) 0.0539(17) 0.0004(14) 0.0174(13) -0.0032(13)
C2 0.139(6) 0.073(4) 0.118(5) -0.007(4) 0.072(5) -0.013(4)
C3 0.186(8) 0.083(4) 0.108(6) 0.032(4) 0.085(6) 0.026(5)
C3S 0.61(5) 0.183(11) 0.27(3) -0.04(2) 0.34(4) -0.07(3)
C1S 0.33(2) 0.37(3) 0.40(3) 0.02(2) 0.06(2) 0.16(2)
C2S 0.60(3) 0.150(10) 0.291(18) -0.002(10) 0.35(2) 0.004(15)
 
_geom_special_details
;
 All esds (except the esd in the dihedral angle between two l.s. planes)
 are estimated using the full covariance matrix.  The cell esds are taken
 into account individually in the estimation of esds in distances, angles
 and torsion angles; correlations between esds in cell parameters are only
 used when they are defined by crystal symmetry.  An approximate (isotropic)
 treatment of cell esds is used for estimating esds involving l.s. planes.
;
 
loop_
 _geom_bond_atom_site_label_1
 _geom_bond_atom_site_label_2
 _geom_bond_distance
 _geom_bond_site_symmetry_2
 _geom_bond_publ_flag
C1 C6 1.378(6) . ?
C1 C2 1.389(7) . ?
C1 H1 0.9300 . ?
C4 C3 1.363(9) . ?
C4 C5 1.380(7) . ?
C4 H4 0.9300 . ?
C5 C6 1.395(6) . ?
C5 C10 1.471(7) . ?
C6 C7 1.484(5) . ?
C7 O1 1.264(4) . ?
C7 C8 1.418(5) . ?
C8 C11 1.392(6) . ?
C8 C9 1.536(7) . ?
C9 C10 1.460(7) . ?
C9 H9A 0.9700 . ?
C9 H9B 0.9700 . ?
C10 H10A 0.9700 . ?
C10 H10B 0.9700 . ?
C11 O2 1.243(5) . ?
C11 C12 1.554(6) . ?
C12 F1 1.313(6) . ?
C12 F3 1.313(6) . ?
C12 F2 1.344(6) . ?
C13 C18 1.373(7) . ?
C13 C14 1.380(7) . ?
C13 H13 0.9300 . ?
C14 C15 1.364(9) . ?
C14 H14 0.9300 . ?
C15 C16 1.334(8) . ?
C15 H15 0.9300 . ?
C16 C17 1.412(7) . ?
C16 H16 0.9300 . ?
C17 C18 1.396(6) . ?
C17 C22 1.468(7) . ?
C18 C19 1.497(6) . ?
C19 O4 1.252(5) . ?
C19 C20 1.417(6) . ?
C20 C23 1.377(6) . ?
C20 C21 1.528(6) . ?
C21 C22 1.532(7) . ?
C21 H21A 0.9700 . ?
C21 H21B 0.9700 . ?
C22 H22A 0.9700 . ?
C22 H22B 0.9700 . ?
C23 O3 1.280(5) . ?
C23 C24 1.514(7) . ?
C24 F5 1.294(7) . ?
C24 F4 1.304(7) . ?
C24 F6 1.327(7) . ?
C25 C26 1.371(7) . ?
C25 C30 1.383(6) . ?
C25 H25 0.9300 . ?
C26 C27 1.388(9) . ?
C26 H26 0.9300 . ?
C27 C28 1.349(9) . ?
C27 H27 0.9300 . ?
C28 C29 1.386(8) . ?
C28 H28 0.9300 . ?
C29 C30 1.397(7) . ?
C29 C34 1.475(8) . ?
C30 C31 1.483(6) . ?
C31 O6 1.270(5) . ?
C31 C32 1.425(6) . ?
C32 C35 1.385(6) . ?
C32 C33 1.530(6) . ?
C33 C34 1.506(8) . ?
C33 H33A 0.9700 . ?
C33 H33B 0.9700 . ?
C34 H34A 0.9700 . ?
C34 H34B 0.9700 . ?
C35 O5 1.261(5) . ?
C35 C36 1.525(7) . ?
C36 F9 1.318(7) . ?
C36 F8 1.322(7) . ?
C36 F7 1.338(7) . ?
C37 N1 1.338(5) . ?
C37 C38 1.376(6) . ?
C37 H37 0.9300 . ?
C38 C39 1.349(7) . ?
C38 H38 0.9300 . ?
C39 C40 1.392(7) . ?
C39 H39 0.9300 . ?
C40 C41 1.372(6) . ?
C40 H40 0.9300 . ?
C41 N1 1.351(5) . ?
C41 C42 1.474(6) . ?
C42 N2 1.342(5) . ?
C42 C43 1.387(6) . ?
C43 C44 1.368(6) . ?
C43 H43 0.9300 . ?
C44 C45 1.369(7) . ?
C44 H44 0.9300 . ?
C45 C46 1.390(6) . ?
C45 H45 0.9300 . ?
C46 N2 1.335(5) . ?
C46 H46 0.9300 . ?
Eu1 O1 2.341(3) . ?
Eu1 O4 2.347(3) . ?
Eu1 O5 2.351(3) . ?
Eu1 O3 2.356(3) . ?
Eu1 O2 2.368(3) . ?
Eu1 O6 2.379(3) . ?
Eu1 N1 2.576(3) . ?
Eu1 N2 2.590(3) . ?
C2 C3 1.357(8) . ?
C2 H2 0.9300 . ?
C3 H3 0.9300 . ?
C3S C2S 1.41(3) . ?
C3S C3S 1.46(4) 3_666 ?
C3S H3S1 0.9700 . ?
C3S H3S2 0.9700 . ?
C1S C2S 1.542(9) . ?
C1S H1S1 0.9600 . ?
C1S H1S2 0.9600 . ?
C1S H1S3 0.9600 . ?
C2S H2S1 0.9700 . ?
C2S H2S2 0.9700 . ?
 
loop_
 _geom_angle_atom_site_label_1
 _geom_angle_atom_site_label_2
 _geom_angle_atom_site_label_3
 _geom_angle
 _geom_angle_site_symmetry_1
 _geom_angle_site_symmetry_3
 _geom_angle_publ_flag
C6 C1 C2 119.8(5) . . ?
C6 C1 H1 120.1 . . ?
C2 C1 H1 120.1 . . ?
C3 C4 C5 121.0(6) . . ?
C3 C4 H4 119.5 . . ?
C5 C4 H4 119.5 . . ?
C4 C5 C6 118.9(5) . . ?
C4 C5 C10 122.7(5) . . ?
C6 C5 C10 118.3(4) . . ?
C1 C6 C5 119.7(4) . . ?
C1 C6 C7 119.7(4) . . ?
C5 C6 C7 120.6(4) . . ?
O1 C7 C8 124.7(4) . . ?
O1 C7 C6 116.3(4) . . ?
C8 C7 C6 118.9(4) . . ?
C11 C8 C7 118.4(4) . . ?
C11 C8 C9 124.7(4) . . ?
C7 C8 C9 116.7(4) . . ?
C10 C9 C8 112.7(5) . . ?
C10 C9 H9A 109.0 . . ?
C8 C9 H9A 109.0 . . ?
C10 C9 H9B 109.0 . . ?
C8 C9 H9B 109.0 . . ?
H9A C9 H9B 107.8 . . ?
C9 C10 C5 113.2(5) . . ?
C9 C10 H10A 108.9 . . ?
C5 C10 H10A 108.9 . . ?
C9 C10 H10B 108.9 . . ?
C5 C10 H10B 108.9 . . ?
H10A C10 H10B 107.7 . . ?
O2 C11 C8 128.6(4) . . ?
O2 C11 C12 112.3(4) . . ?
C8 C11 C12 119.2(4) . . ?
F1 C12 F3 106.5(5) . . ?
F1 C12 F2 107.2(5) . . ?
F3 C12 F2 106.4(5) . . ?
F1 C12 C11 113.2(4) . . ?
F3 C12 C11 111.8(4) . . ?
F2 C12 C11 111.4(4) . . ?
C18 C13 C14 120.6(6) . . ?
C18 C13 H13 119.7 . . ?
C14 C13 H13 119.7 . . ?
C15 C14 C13 118.8(7) . . ?
C15 C14 H14 120.6 . . ?
C13 C14 H14 120.6 . . ?
C16 C15 C14 121.7(6) . . ?
C16 C15 H15 119.2 . . ?
C14 C15 H15 119.2 . . ?
C15 C16 C17 121.6(6) . . ?
C15 C16 H16 119.2 . . ?
C17 C16 H16 119.2 . . ?
C18 C17 C16 116.5(5) . . ?
C18 C17 C22 120.0(5) . . ?
C16 C17 C22 123.4(5) . . ?
C13 C18 C17 120.8(5) . . ?
C13 C18 C19 119.4(4) . . ?
C17 C18 C19 119.6(5) . . ?
O4 C19 C20 123.9(4) . . ?
O4 C19 C18 116.4(4) . . ?
C20 C19 C18 119.7(4) . . ?
C23 C20 C19 120.0(4) . . ?
C23 C20 C21 123.6(4) . . ?
C19 C20 C21 116.3(4) . . ?
C20 C21 C22 110.4(4) . . ?
C20 C21 H21A 109.6 . . ?
C22 C21 H21A 109.6 . . ?
C20 C21 H21B 109.6 . . ?
C22 C21 H21B 109.6 . . ?
H21A C21 H21B 108.1 . . ?
C17 C22 C21 112.6(4) . . ?
C17 C22 H22A 109.1 . . ?
C21 C22 H22A 109.1 . . ?
C17 C22 H22B 109.1 . . ?
C21 C22 H22B 109.1 . . ?
H22A C22 H22B 107.8 . . ?
O3 C23 C20 128.1(4) . . ?
O3 C23 C24 112.5(5) . . ?
C20 C23 C24 119.3(5) . . ?
F5 C24 F4 105.5(5) . . ?
F5 C24 F6 104.4(6) . . ?
F4 C24 F6 103.3(6) . . ?
F5 C24 C23 115.2(5) . . ?
F4 C24 C23 115.5(6) . . ?
F6 C24 C23 111.6(5) . . ?
C26 C25 C30 121.5(6) . . ?
C26 C25 H25 119.3 . . ?
C30 C25 H25 119.3 . . ?
C25 C26 C27 118.3(6) . . ?
C25 C26 H26 120.9 . . ?
C27 C26 H26 120.9 . . ?
C28 C27 C26 121.0(7) . . ?
C28 C27 H27 119.5 . . ?
C26 C27 H27 119.5 . . ?
C27 C28 C29 121.5(7) . . ?
C27 C28 H28 119.3 . . ?
C29 C28 H28 119.3 . . ?
C28 C29 C30 118.1(6) . . ?
C28 C29 C34 122.9(6) . . ?
C30 C29 C34 119.0(5) . . ?
C25 C30 C29 119.6(5) . . ?
C25 C30 C31 120.4(4) . . ?
C29 C30 C31 119.9(5) . . ?
O6 C31 C32 123.9(4) . . ?
O6 C31 C30 117.1(4) . . ?
C32 C31 C30 118.9(4) . . ?
C35 C32 C31 119.9(4) . . ?
C35 C32 C33 123.2(4) . . ?
C31 C32 C33 116.8(4) . . ?
C34 C33 C32 111.8(4) . . ?
C34 C33 H33A 109.3 . . ?
C32 C33 H33A 109.3 . . ?
C34 C33 H33B 109.3 . . ?
C32 C33 H33B 109.3 . . ?
H33A C33 H33B 107.9 . . ?
C29 C34 C33 111.3(5) . . ?
C29 C34 H34A 109.4 . . ?
C33 C34 H34A 109.4 . . ?
C29 C34 H34B 109.4 . . ?
C33 C34 H34B 109.4 . . ?
H34A C34 H34B 108.0 . . ?
O5 C35 C32 127.6(4) . . ?
O5 C35 C36 112.2(4) . . ?
C32 C35 C36 120.2(4) . . ?
F9 C36 F8 108.6(6) . . ?
F9 C36 F7 104.6(6) . . ?
F8 C36 F7 105.8(5) . . ?
F9 C36 C35 111.6(5) . . ?
F8 C36 C35 112.3(5) . . ?
F7 C36 C35 113.4(5) . . ?
N1 C37 C38 123.8(5) . . ?
N1 C37 H37 118.1 . . ?
C38 C37 H37 118.1 . . ?
C39 C38 C37 118.7(5) . . ?
C39 C38 H38 120.6 . . ?
C37 C38 H38 120.6 . . ?
C38 C39 C40 118.6(5) . . ?
C38 C39 H39 120.7 . . ?
C40 C39 H39 120.7 . . ?
C41 C40 C39 120.2(5) . . ?
C41 C40 H40 119.9 . . ?
C39 C40 H40 119.9 . . ?
N1 C41 C40 121.0(4) . . ?
N1 C41 C42 116.2(4) . . ?
C40 C41 C42 122.8(4) . . ?
N2 C42 C43 120.6(4) . . ?
N2 C42 C41 116.7(4) . . ?
C43 C42 C41 122.8(4) . . ?
C44 C43 C42 120.7(4) . . ?
C44 C43 H43 119.7 . . ?
C42 C43 H43 119.7 . . ?
C45 C44 C43 118.9(5) . . ?
C45 C44 H44 120.6 . . ?
C43 C44 H44 120.6 . . ?
C44 C45 C46 118.1(5) . . ?
C44 C45 H45 120.9 . . ?
C46 C45 H45 120.9 . . ?
N2 C46 C45 123.2(4) . . ?
N2 C46 H46 118.4 . . ?
C45 C46 H46 118.4 . . ?
O1 Eu1 O4 73.41(10) . . ?
O1 Eu1 O5 79.39(10) . . ?
O4 Eu1 O5 79.10(10) . . ?
O1 Eu1 O3 118.31(10) . . ?
O4 Eu1 O3 69.89(9) . . ?
O5 Eu1 O3 136.12(10) . . ?
O1 Eu1 O2 69.14(9) . . ?
O4 Eu1 O2 106.62(10) . . ?
O5 Eu1 O2 144.22(10) . . ?
O3 Eu1 O2 76.15(10) . . ?
O1 Eu1 O6 142.17(9) . . ?
O4 Eu1 O6 79.82(10) . . ?
O5 Eu1 O6 69.55(9) . . ?
O3 Eu1 O6 74.92(10) . . ?
O2 Eu1 O6 145.87(10) . . ?
O1 Eu1 N1 130.13(10) . . ?
O4 Eu1 N1 152.94(10) . . ?
O5 Eu1 N1 114.89(10) . . ?
O3 Eu1 N1 85.18(11) . . ?
O2 Eu1 N1 76.14(10) . . ?
O6 Eu1 N1 83.75(10) . . ?
O1 Eu1 N2 78.86(10) . . ?
O4 Eu1 N2 143.96(10) . . ?
O5 Eu1 N2 73.49(10) . . ?
O3 Eu1 N2 145.41(10) . . ?
O2 Eu1 N2 83.88(10) . . ?
O6 Eu1 N2 110.94(10) . . ?
N1 Eu1 N2 62.53(11) . . ?
C37 N1 C41 117.6(4) . . ?
C37 N1 Eu1 119.7(3) . . ?
C41 N1 Eu1 122.1(3) . . ?
C46 N2 C42 118.6(4) . . ?
C46 N2 Eu1 119.5(3) . . ?
C42 N2 Eu1 121.7(3) . . ?
C7 O1 Eu1 134.8(2) . . ?
C11 O2 Eu1 133.6(3) . . ?
C23 O3 Eu1 131.0(3) . . ?
C19 O4 Eu1 136.0(3) . . ?
C35 O5 Eu1 133.8(3) . . ?
C31 O6 Eu1 131.6(2) . . ?
C3 C2 C1 120.3(6) . . ?
C3 C2 H2 119.9 . . ?
C1 C2 H2 119.9 . . ?
C2 C3 C4 120.3(6) . . ?
C2 C3 H3 119.8 . . ?
C4 C3 H3 119.8 . . ?
C2S C3S C3S 96(3) . 3_666 ?
C2S C3S H3S1 112.5 . . ?
C3S C3S H3S1 112.5 3_666 . ?
C2S C3S H3S2 112.5 . . ?
C3S C3S H3S2 112.5 3_666 . ?
H3S1 C3S H3S2 110.0 . . ?
C2S C1S H1S1 109.5 . . ?
C2S C1S H1S2 109.5 . . ?
H1S1 C1S H1S2 109.5 . . ?
C2S C1S H1S3 109.5 . . ?
H1S1 C1S H1S3 109.5 . . ?
H1S2 C1S H1S3 109.5 . . ?
C3S C2S C1S 88.9(9) . . ?
C3S C2S H2S1 113.8 . . ?
C1S C2S H2S1 113.8 . . ?
C3S C2S H2S2 113.8 . . ?
C1S C2S H2S2 113.8 . . ?
H2S1 C2S H2S2 111.1 . . ?
 
loop_
 _geom_torsion_atom_site_label_1
 _geom_torsion_atom_site_label_2
 _geom_torsion_atom_site_label_3
 _geom_torsion_atom_site_label_4
 _geom_torsion
 _geom_torsion_site_symmetry_1
 _geom_torsion_site_symmetry_2
 _geom_torsion_site_symmetry_3
 _geom_torsion_site_symmetry_4
 _geom_torsion_publ_flag
C3 C4 C5 C6 1.2(9) . . . . ?
C3 C4 C5 C10 177.8(6) . . . . ?
C2 C1 C6 C5 0.4(7) . . . . ?
C2 C1 C6 C7 179.8(4) . . . . ?
C4 C5 C6 C1 -1.1(7) . . . . ?
C10 C5 C6 C1 -177.8(5) . . . . ?
C4 C5 C6 C7 179.5(5) . . . . ?
C10 C5 C6 C7 2.8(7) . . . . ?
C1 C6 C7 O1 14.7(6) . . . . ?
C5 C6 C7 O1 -165.9(4) . . . . ?
C1 C6 C7 C8 -164.8(4) . . . . ?
C5 C6 C7 C8 14.6(6) . . . . ?
O1 C7 C8 C11 -1.8(6) . . . . ?
C6 C7 C8 C11 177.7(4) . . . . ?
O1 C7 C8 C9 -177.3(4) . . . . ?
C6 C7 C8 C9 2.2(6) . . . . ?
C11 C8 C9 C10 149.8(5) . . . . ?
C7 C8 C9 C10 -35.0(7) . . . . ?
C8 C9 C10 C5 51.7(8) . . . . ?
C4 C5 C10 C9 147.0(6) . . . . ?
C6 C5 C10 C9 -36.5(8) . . . . ?
C7 C8 C11 O2 -2.5(7) . . . . ?
C9 C8 C11 O2 172.6(5) . . . . ?
C7 C8 C11 C12 179.6(4) . . . . ?
C9 C8 C11 C12 -5.3(7) . . . . ?
O2 C11 C12 F1 118.5(5) . . . . ?
C8 C11 C12 F1 -63.3(6) . . . . ?
O2 C11 C12 F3 -1.7(6) . . . . ?
C8 C11 C12 F3 176.5(4) . . . . ?
O2 C11 C12 F2 -120.6(5) . . . . ?
C8 C11 C12 F2 57.6(6) . . . . ?
C18 C13 C14 C15 0.1(9) . . . . ?
C13 C14 C15 C16 0.7(11) . . . . ?
C14 C15 C16 C17 -2.0(10) . . . . ?
C15 C16 C17 C18 2.4(8) . . . . ?
C15 C16 C17 C22 179.6(5) . . . . ?
C14 C13 C18 C17 0.3(8) . . . . ?
C14 C13 C18 C19 -175.4(5) . . . . ?
C16 C17 C18 C13 -1.5(7) . . . . ?
C22 C17 C18 C13 -178.9(5) . . . . ?
C16 C17 C18 C19 174.2(4) . . . . ?
C22 C17 C18 C19 -3.1(7) . . . . ?
C13 C18 C19 O4 13.3(6) . . . . ?
C17 C18 C19 O4 -162.5(4) . . . . ?
C13 C18 C19 C20 -170.2(5) . . . . ?
C17 C18 C19 C20 14.1(6) . . . . ?
O4 C19 C20 C23 8.3(6) . . . . ?
C18 C19 C20 C23 -168.0(4) . . . . ?
O4 C19 C20 C21 -173.1(4) . . . . ?
C18 C19 C20 C21 10.6(6) . . . . ?
C23 C20 C21 C22 135.6(5) . . . . ?
C19 C20 C21 C22 -42.8(6) . . . . ?
C18 C17 C22 C21 -30.5(6) . . . . ?
C16 C17 C22 C21 152.3(5) . . . . ?
C20 C21 C22 C17 52.4(6) . . . . ?
C19 C20 C23 O3 -5.0(7) . . . . ?
C21 C20 C23 O3 176.6(5) . . . . ?
C19 C20 C23 C24 172.2(5) . . . . ?
C21 C20 C23 C24 -6.3(7) . . . . ?
O3 C23 C24 F5 -118.3(6) . . . . ?
C20 C23 C24 F5 64.1(8) . . . . ?
O3 C23 C24 F4 118.2(6) . . . . ?
C20 C23 C24 F4 -59.3(8) . . . . ?
O3 C23 C24 F6 0.5(8) . . . . ?
C20 C23 C24 F6 -177.0(5) . . . . ?
C30 C25 C26 C27 -0.7(8) . . . . ?
C25 C26 C27 C28 -0.1(10) . . . . ?
C26 C27 C28 C29 -0.4(11) . . . . ?
C27 C28 C29 C30 1.7(9) . . . . ?
C27 C28 C29 C34 -177.4(6) . . . . ?
C26 C25 C30 C29 2.0(7) . . . . ?
C26 C25 C30 C31 179.0(4) . . . . ?
C28 C29 C30 C25 -2.5(7) . . . . ?
C34 C29 C30 C25 176.7(5) . . . . ?
C28 C29 C30 C31 -179.5(5) . . . . ?
C34 C29 C30 C31 -0.3(7) . . . . ?
C25 C30 C31 O6 -13.0(6) . . . . ?
C29 C30 C31 O6 164.0(4) . . . . ?
C25 C30 C31 C32 163.1(4) . . . . ?
C29 C30 C31 C32 -19.9(6) . . . . ?
O6 C31 C32 C35 -0.5(6) . . . . ?
C30 C31 C32 C35 -176.3(4) . . . . ?
O6 C31 C32 C33 176.7(4) . . . . ?
C30 C31 C32 C33 0.9(6) . . . . ?
C35 C32 C33 C34 -147.4(5) . . . . ?
C31 C32 C33 C34 35.5(6) . . . . ?
C28 C29 C34 C33 -143.7(6) . . . . ?
C30 C29 C34 C33 37.1(7) . . . . ?
C32 C33 C34 C29 -53.7(7) . . . . ?
C31 C32 C35 O5 -9.8(7) . . . . ?
C33 C32 C35 O5 173.3(4) . . . . ?
C31 C32 C35 C36 169.3(5) . . . . ?
C33 C32 C35 C36 -7.6(7) . . . . ?
O5 C35 C36 F9 15.9(7) . . . . ?
C32 C35 C36 F9 -163.4(5) . . . . ?
O5 C35 C36 F8 -106.4(6) . . . . ?
C32 C35 C36 F8 74.4(7) . . . . ?
O5 C35 C36 F7 133.7(5) . . . . ?
C32 C35 C36 F7 -45.5(7) . . . . ?
N1 C37 C38 C39 -0.8(9) . . . . ?
C37 C38 C39 C40 0.8(9) . . . . ?
C38 C39 C40 C41 -0.7(9) . . . . ?
C39 C40 C41 N1 0.4(7) . . . . ?
C39 C40 C41 C42 179.3(5) . . . . ?
N1 C41 C42 N2 10.3(5) . . . . ?
C40 C41 C42 N2 -168.6(4) . . . . ?
N1 C41 C42 C43 -169.7(4) . . . . ?
C40 C41 C42 C43 11.5(7) . . . . ?
N2 C42 C43 C44 1.1(7) . . . . ?
C41 C42 C43 C44 -178.9(4) . . . . ?
C42 C43 C44 C45 0.7(8) . . . . ?
C43 C44 C45 C46 -1.2(8) . . . . ?
C44 C45 C46 N2 0.1(8) . . . . ?
C38 C37 N1 C41 0.5(7) . . . . ?
C38 C37 N1 Eu1 -170.8(4) . . . . ?
C40 C41 N1 C37 -0.3(6) . . . . ?
C42 C41 N1 C37 -179.2(4) . . . . ?
C40 C41 N1 Eu1 170.8(3) . . . . ?
C42 C41 N1 Eu1 -8.1(5) . . . . ?
C45 C46 N2 C42 1.6(6) . . . . ?
C45 C46 N2 Eu1 -172.7(4) . . . . ?
C43 C42 N2 C46 -2.2(6) . . . . ?
C41 C42 N2 C46 177.8(4) . . . . ?
C43 C42 N2 Eu1 172.0(3) . . . . ?
C41 C42 N2 Eu1 -7.9(5) . . . . ?
C8 C7 O1 Eu1 31.0(6) . . . . ?
C6 C7 O1 Eu1 -148.5(3) . . . . ?
C8 C11 O2 Eu1 -21.0(7) . . . . ?
C12 C11 O2 Eu1 157.0(3) . . . . ?
C20 C23 O3 Eu1 -25.4(7) . . . . ?
C24 C23 O3 Eu1 157.3(4) . . . . ?
C20 C19 O4 Eu1 20.3(7) . . . . ?
C18 C19 O4 Eu1 -163.2(3) . . . . ?
C32 C35 O5 Eu1 -15.5(7) . . . . ?
C36 C35 O5 Eu1 165.3(3) . . . . ?
C32 C31 O6 Eu1 35.5(6) . . . . ?
C30 C31 O6 Eu1 -148.6(3) . . . . ?
C6 C1 C2 C3 0.2(9) . . . . ?
C1 C2 C3 C4 -0.1(10) . . . . ?
C5 C4 C3 C2 -0.7(10) . . . . ?
C3S C3S C2S C1S -164.2(17) 3_666 . . . ?
 
loop_
 _geom_hbond_atom_site_label_D 
 _geom_hbond_atom_site_label_H 
 _geom_hbond_atom_site_label_A 
 _geom_hbond_distance_DH 
 _geom_hbond_distance_HA 
 _geom_hbond_distance_DA 
 _geom_hbond_angle_DHA 
 _geom_hbond_site_symmetry_A 
C33 H33A F8  0.97 2.50 3.192(7) 128.2 .
C33 H33A F7  0.97 2.55 2.882(7) 100.3 .
C21 H21A F5  0.97 2.47 3.039(7) 116.8 .
C21 H21A F4  0.97 2.38 3.068(7) 127.2 .
C9 H9B F1  0.97 2.46 3.153(7) 127.9 .
 
_refine_diff_density_max    0.875
_refine_diff_density_min   -0.761
_refine_diff_density_rms    0.080

_shelx_res_file
;

    HDS161202_0m.res created by SHELXL-2014/7

TITL HDS161202_0m in P21/c
CELL  0.71073   12.0336   21.1340   19.0963    90.000   110.757    90.000
ZERR  4           0.0016    0.0030    0.0017     0.000     0.006     0.000
LATT 1
SYMM             - X ,    0.50000 + Y ,    0.50000 - Z
SFAC C  H  N  O  F  Eu
UNIT 196 156 8 24 36 4
OMIT -2 0 8
OMIT -1 0 4
OMIT -4 0 18
L.S. 20
ACTA
BOND $H
FMAP 2
PLAN 15
ISOR 0.005 F6
DELU 0.01 F6 C24
DFIX 1.55 0.01 C1S C2S
DFIX 2.0 0.01 H3S2 H1S1
DFIX 2.0 0.01 H3S1 H1S1
HTAB C33 F8
HTAB C33 F7
HTAB C21 F5
HTAB C21 F4
HTAB C9 F1
DELU 0.01 C5 C10
CONF
FREE C3S  C1S
TEMP    23
WGHT    0.045700    0.045700
FVAR       0.16798
C1    1    0.644185    0.423198    0.369630    11.00000    0.10168    0.05396 =
         0.08945   -0.00265    0.04334   -0.00425
AFIX  43
H1    2    0.716325    0.412761    0.406510    11.00000   -1.20000
AFIX   0
C4    1    0.431976    0.455476    0.260920    11.00000    0.12515    0.09513 =
         0.09728    0.03560    0.04016    0.03048
AFIX  43
H4    2    0.359998    0.466823    0.224469    11.00000   -1.20000
AFIX   0
C5    1    0.444886    0.395885    0.292415    11.00000    0.08235    0.08190 =
         0.07040    0.01132    0.02896    0.00866
C6    1    0.552583    0.379925    0.348090    11.00000    0.06931    0.05953 =
         0.05517    0.00108    0.03150    0.00573
C7    1    0.569731    0.316552    0.383819    11.00000    0.04827    0.05999 =
         0.04851   -0.00525    0.02466   -0.00152
C8    1    0.487623    0.267732    0.349541    11.00000    0.04960    0.06752 =
         0.05438   -0.00492    0.01090   -0.00357
C9    1    0.388309    0.284161    0.275254    11.00000    0.07567    0.10676 =
         0.08455   -0.00155   -0.00410   -0.00771
AFIX  23
H9A   2    0.417084    0.277313    0.234402    11.00000   -1.20000
H9B   2    0.321633    0.255896    0.267982    11.00000   -1.20000
AFIX   0
C10   1    0.347558    0.349489    0.272767    11.00000    0.09292    0.11803 =
         0.09029    0.01862    0.00387    0.01110
AFIX  23
H10A  2    0.304985    0.354085    0.307134    11.00000   -1.20000
H10B  2    0.292361    0.358595    0.222748    11.00000   -1.20000
AFIX   0
C11   1    0.507040    0.207865    0.382021    11.00000    0.04615    0.06508 =
         0.05943   -0.01211    0.02520   -0.01264
C12   1    0.417544    0.153900    0.345521    11.00000    0.07407    0.08224 =
         0.08430   -0.01442    0.02188   -0.01675
C13   1    0.952771    0.361360    0.349278    11.00000    0.08959    0.09469 =
         0.08325    0.01188    0.04072   -0.00597
AFIX  43
H13   2    0.923802    0.372377    0.386760    11.00000   -1.20000
AFIX   0
C14   1    0.985801    0.408146    0.310192    11.00000    0.11520    0.11024 =
         0.12592    0.02173    0.06561   -0.01910
AFIX  43
H14   2    0.979503    0.450603    0.321039    11.00000   -1.20000
AFIX   0
C15   1    1.027876    0.390988    0.255334    11.00000    0.10059    0.14097 =
         0.10095    0.02894    0.04313   -0.02134
AFIX  43
H15   2    1.051141    0.422314    0.229195    11.00000   -1.20000
AFIX   0
C16   1    1.036503    0.330433    0.238225    11.00000    0.06753    0.16987 =
         0.06201    0.01353    0.03497   -0.02483
AFIX  43
H16   2    1.063221    0.320624    0.199403    11.00000   -1.20000
AFIX   0
C17   1    1.006054    0.280886    0.277630    11.00000    0.05143    0.13522 =
         0.04520   -0.00156    0.01918   -0.01149
C18   1    0.962278    0.298658    0.333343    11.00000    0.05387    0.09578 =
         0.04496    0.00429    0.02300   -0.00447
C19   1    0.917210    0.249076    0.372568    11.00000    0.05180    0.08488 =
         0.04019   -0.00602    0.01630   -0.00113
C20   1    0.943126    0.184503    0.365432    11.00000    0.05579    0.08491 =
         0.05096   -0.01327    0.02402    0.00008
C21   1    1.034881    0.170980    0.328839    11.00000    0.07625    0.12320 =
         0.08343   -0.01131    0.04351    0.01394
AFIX  23
H21A  2    1.029508    0.126975    0.313557    11.00000   -1.20000
H21B  2    1.114133    0.178352    0.364779    11.00000   -1.20000
AFIX   0
C22   1    1.013444    0.213660    0.260451    11.00000    0.06986    0.15400 =
         0.05678   -0.01735    0.03604   -0.00218
AFIX  23
H22A  2    1.077623    0.207777    0.241503    11.00000   -1.20000
H22B  2    0.940037    0.201068    0.221364    11.00000   -1.20000
AFIX   0
C23   1    0.884703    0.137955    0.389299    11.00000    0.06805    0.07549 =
         0.05288   -0.01653    0.01992    0.00184
C24   1    0.901501    0.069421    0.372295    11.00000    0.11111    0.09187 =
         0.12056   -0.02706    0.06466   -0.00425
C25   1    1.190095    0.128165    0.560581    11.00000    0.07119    0.10551 =
         0.05964   -0.01149    0.01903    0.01287
AFIX  43
H25   2    1.126760    0.107876    0.568226    11.00000   -1.20000
AFIX   0
C26   1    1.283429    0.092859    0.556917    11.00000    0.08894    0.11406 =
         0.10450   -0.02018    0.02092    0.02779
AFIX  43
H26   2    1.284442    0.049123    0.562488    11.00000   -1.20000
AFIX   0
C27   1    1.376397    0.124076    0.544675    11.00000    0.07961    0.18479 =
         0.10313   -0.02681    0.01800    0.03487
AFIX  43
H27   2    1.440557    0.100906    0.542125    11.00000   -1.20000
AFIX   0
C28   1    1.375141    0.187511    0.536418    11.00000    0.05996    0.17414 =
         0.09423   -0.01203    0.02401    0.00288
AFIX  43
H28   2    1.438846    0.207249    0.528613    11.00000   -1.20000
AFIX   0
C29   1    1.281050    0.223927    0.539304    11.00000    0.05057    0.13596 =
         0.06119   -0.00955    0.01465   -0.00638
C30   1    1.188029    0.193273    0.553164    11.00000    0.05236    0.08641 =
         0.04171   -0.00351    0.00770    0.00473
C31   1    1.085062    0.230257    0.556098    11.00000    0.04720    0.07939 =
         0.03761    0.00283    0.01012   -0.00286
C32   1    1.098086    0.296759    0.568738    11.00000    0.06106    0.06872 =
         0.05378   -0.00096    0.01944   -0.01413
C33   1    1.219023    0.325328    0.577319    11.00000    0.07188    0.10352 =
         0.09467   -0.00085    0.02711   -0.03022
AFIX  23
H33A  2    1.209303    0.369996    0.564970    11.00000   -1.20000
H33B  2    1.271727    0.321494    0.629061    11.00000   -1.20000
AFIX   0
C34   1    1.274471    0.293007    0.527451    11.00000    0.06500    0.15456 =
         0.10862    0.00061    0.04513   -0.02908
AFIX  23
H34A  2    1.227792    0.302031    0.475507    11.00000   -1.20000
H34B  2    1.353847    0.309626    0.537814    11.00000   -1.20000
AFIX   0
C35   1    1.005417    0.331712    0.576010    11.00000    0.06726    0.06553 =
         0.05307   -0.00469    0.01765   -0.01712
C36   1    1.025362    0.400169    0.602851    11.00000    0.09679    0.07016 =
         0.12478   -0.00917    0.03975   -0.02289
C37   1    0.782507    0.077225    0.570173    11.00000    0.10851    0.06755 =
         0.07080    0.00155    0.04622    0.00131
AFIX  43
H37   2    0.814870    0.069819    0.533345    11.00000   -1.20000
AFIX   0
C38   1    0.756758    0.025822    0.605971    11.00000    0.12268    0.06202 =
         0.08784   -0.00410    0.04407   -0.00967
AFIX  43
H38   2    0.770560   -0.015091    0.593072    11.00000   -1.20000
AFIX   0
C39   1    0.711121    0.035915    0.660121    11.00000    0.12298    0.07670 =
         0.09889    0.01063    0.05720   -0.02187
AFIX  43
H39   2    0.693782    0.002139    0.685745    11.00000   -1.20000
AFIX   0
C40   1    0.690512    0.097910    0.676863    11.00000    0.09658    0.07935 =
         0.07552    0.00264    0.04744   -0.01902
AFIX  43
H40   2    0.658296    0.105789    0.713661    11.00000   -1.20000
AFIX   0
C41   1    0.717534    0.147435    0.639301    11.00000    0.05661    0.06863 =
         0.05024    0.00612    0.02482   -0.00593
C42   1    0.696456    0.214011    0.653898    11.00000    0.04363    0.07194 =
         0.04856    0.00268    0.01770   -0.00559
C43   1    0.667298    0.232607    0.714863    11.00000    0.07587    0.09347 =
         0.05480    0.00624    0.03791   -0.00432
AFIX  43
H43   2    0.661708    0.202428    0.748903    11.00000   -1.20000
AFIX   0
C44   1    0.646662    0.294925    0.725442    11.00000    0.09869    0.10452 =
         0.07083   -0.01140    0.05126    0.00637
AFIX  43
H44   2    0.627932    0.307382    0.766645    11.00000   -1.20000
AFIX   0
C45   1    0.654054    0.338628    0.674351    11.00000    0.09720    0.08179 =
         0.07696   -0.01363    0.05092    0.01195
AFIX  43
H45   2    0.639027    0.381218    0.679456    11.00000   -1.20000
AFIX   0
C46   1    0.684654    0.317545    0.614626    11.00000    0.07176    0.07611 =
         0.06341    0.00278    0.03667    0.00448
AFIX  43
H46   2    0.689918    0.347078    0.579831    11.00000   -1.20000
AFIX   0
EU1   6    0.787029    0.226794    0.500043    11.00000    0.04952    0.05488 =
         0.04147   -0.00262    0.02025   -0.00502
F1    5    0.310333    0.164950    0.345865    11.00000    0.06634    0.15814 =
         0.15787   -0.02153    0.03967   -0.04107
F2    5    0.407382    0.144438    0.273916    11.00000    0.12729    0.10671 =
         0.08742   -0.04260    0.02351   -0.03368
F3    5    0.451603    0.099754    0.380199    11.00000    0.12482    0.08317 =
         0.13998    0.00325    0.01371   -0.04751
F4    5    0.870852    0.055335    0.301468    11.00000    0.21121    0.12908 =
         0.11605   -0.07076    0.04818    0.00702
F5    5    1.008381    0.047824    0.403541    11.00000    0.16783    0.11982 =
         0.18155   -0.02007    0.03482    0.06447
F6    5    0.834859    0.031067    0.395944    11.00000    0.24770    0.08980 =
         0.25115   -0.04525    0.16126   -0.01707
F7    5    1.124963    0.408543    0.662245    11.00000    0.13775    0.10407 =
         0.13014   -0.04615    0.02737   -0.05083
F8    5    1.033726    0.438947    0.550594    11.00000    0.19905    0.07438 =
         0.16409    0.02737    0.05841   -0.03013
F9    5    0.939735    0.420438    0.625096    11.00000    0.13810    0.08291 =
         0.21519   -0.05745    0.08358   -0.02609
N1    3    0.763670    0.137236    0.585293    11.00000    0.06718    0.05689 =
         0.05547    0.00392    0.02708   -0.00299
N2    3    0.706838    0.256965    0.604822    11.00000    0.05833    0.06117 =
         0.04901   -0.00016    0.02725   -0.00077
O1    4    0.658921    0.310298    0.443390    11.00000    0.05664    0.05576 =
         0.05629   -0.00518    0.01607   -0.00094
O2    4    0.591144    0.189436    0.437718    11.00000    0.05022    0.06279 =
         0.06910    0.00326    0.01626   -0.00592
O3    4    0.810926    0.144572    0.423293    11.00000    0.07253    0.06950 =
         0.07134   -0.01896    0.03708   -0.01190
O4    4    0.852724    0.267976    0.407347    11.00000    0.07632    0.07149 =
         0.05354    0.00729    0.04171    0.00844
O5    4    0.900267    0.313688    0.563558    11.00000    0.05723    0.06535 =
         0.05788   -0.00972    0.02291   -0.01191
O6    4    0.991955    0.199486    0.551311    11.00000    0.05104    0.06243 =
         0.05388    0.00043    0.01743   -0.00325
C2    1    0.628370    0.482441    0.336066    11.00000    0.13946    0.07296 =
         0.11810   -0.00708    0.07217   -0.01299
AFIX  43
H2    2    0.690205    0.511634    0.350410    11.00000   -1.20000
AFIX   0
C3    1    0.523117    0.497927    0.282439    11.00000    0.18615    0.08337 =
         0.10833    0.03216    0.08460    0.02625
AFIX  43
H3    2    0.513114    0.537714    0.260252    11.00000   -1.20000
AFIX   0
C3S   1    0.557600    0.497506    0.530268    11.00000    0.61313    0.18255 =
         0.26923   -0.04340    0.34213   -0.07428
AFIX  23
H3S1  2    0.550306    0.494361    0.579132    11.00000   -1.20000
H3S2  2    0.604879    0.462649    0.523053    11.00000   -1.20000
AFIX   0
C1S   1    0.727273    0.535074    0.567011    11.00000    0.32875    0.37102 =
         0.40128    0.01679    0.06091    0.16266
AFIX 137
H1S1  2    0.723320    0.509874    0.607889    11.00000   -1.50000
H1S2  2    0.776378    0.571450    0.586305    11.00000   -1.50000
H1S3  2    0.760635    0.510375    0.537131    11.00000   -1.50000
AFIX   0
C2S   1    0.601170    0.556795    0.518360    11.00000    0.60491    0.14968 =
         0.29118   -0.00191    0.35241    0.00361
AFIX  23
H2S1  2    0.571776    0.591983    0.539429    11.00000   -1.20000
H2S2  2    0.591464    0.564843    0.466512    11.00000   -1.20000
AFIX   0
HKLF 4 1 -1.0000  0.0000  0.0000  0.0000 -1.0000  0.0000  1.0000  0.0000  1.0000

REM  HDS161202_0m in P21/c
REM R1 =  0.0430 for    7033 Fo > 4sig(Fo)  and  0.0828 for all   11028 data
REM    605 parameters refined using     11 restraints

END

WGHT      0.0469      1.2296

REM Highest difference peak  0.875,  deepest hole -0.761,  1-sigma level  0.080
Q1    1   0.7877  0.3189  0.5012  11.00000  0.05    0.87
Q2    1   0.7863  0.2672  0.4998  11.00000  0.05    0.82
Q3    1   0.6975  0.2279  0.4719  11.00000  0.05    0.78
Q4    1   0.7044  0.2303  0.5253  11.00000  0.05    0.74
Q5    1   0.8568  0.2280  0.4786  11.00000  0.05    0.70
Q6    1   0.7975  0.1874  0.4803  11.00000  0.05    0.62
Q7    1   0.8660  0.2233  0.5319  11.00000  0.05    0.61
Q8    1   0.9192  0.0412  0.4380  11.00000  0.05    0.58
Q9    1   0.7071  0.1819  0.4904  11.00000  0.05    0.50
Q10   1   0.7906  0.1794  0.5171  11.00000  0.05    0.48
Q11   1   0.7700  0.0513  0.3369  11.00000  0.05    0.47
Q12   1   0.7003  0.2567  0.4529  11.00000  0.05    0.42
Q13   1   0.8998  0.4318  0.5478  11.00000  0.05    0.42
Q14   1   0.7082  0.2688  0.4967  11.00000  0.05    0.41
Q15   1   0.3519  0.2930  0.3133  11.00000  0.05    0.40
;
_shelx_res_checksum   51819

_shelx_hkl_file
;
  -2   0   0 367.816  18.186   2
  -3   0   0 0.38984 0.44597   2
  -4   0   0 284.386  14.480   2
  -5   0   0 -1.0078  0.6560   2
   5   0   0 -0.6130  0.3112   1
  -6   0   0 87.2256  5.2803   2
   6   0   0 85.8499  4.3924   1
  -7   0   0 -0.6900  1.2334   2
  -7   0   0 -4.0448  1.3283   3
  -8   0   0 96.2360  6.4621   3
  -8   0   0 100.795   6.362   2
  -9   0   0 -3.7126  1.7361   2
  -9   0   0 -1.5708  1.8520   3
 -10   0   0 27.1398  3.4502   2
 -10   0   0 20.4792  3.5882   3
 -11   0   0 -0.8797  2.2806   3
 -11   0   0 -1.8915  1.8088   2
 -12   0   0 95.6637  7.8097   3
 -13   0   0 -2.2598  2.8476   3
 -14   0   0 37.2004  5.6384   3
 -15   0   0 1.57435 3.15410   3
  -2  -1   0 420.883  20.187   2
  -2  -1   0 394.509  18.634   3
  -2   1   0 415.584  20.330   2
  -3  -1   0 0.58799 0.58664   3
  -3  -1   0 0.46932 0.44184   2
  -3   1   0 -0.1177  0.4826   2
   3   1   0 -0.2200  0.2890   1
  -4  -1   0 321.985  16.233   2
  -4  -1   0 322.248  15.273   3
  -4   1   0 310.006  16.344   2
   4   1   0 333.660  15.155   1
  -5  -1   0 5.45464 1.09140   2
  -5  -1   0 5.26622 1.33249   3
   5   1   0 5.51371 0.79510   1
  -5   1   0 3.75779 1.06456   2
  -6  -1   0 1010.22   45.96   3
  -6  -1   0 993.179  49.653   2
  -6   1   0 1010.20   49.80   2
   6   1   0 1003.62   46.54   1
  -7  -1   0 37.9115  3.8570   3
  -7   1   0 40.5468  3.2718   2
   7   1   0 34.5265  2.3505   1
  -8  -1   0 227.569  12.480   2
  -8  -1   0 236.172  12.420   3
  -8   1   0 222.612  12.575   2
  -9  -1   0 25.3968  3.2608   2
  -9  -1   0 30.9499  3.9290   3
  -9   1   0 24.6466  3.3788   2
  -9   1   0 26.0886  3.7686   3
 -10  -1   0 31.0763  3.6308   2
 -10  -1   0 27.8736  4.1405   3
 -10   1   0 29.2177  3.7543   2
 -10   1   0 36.0905  4.2651   3
 -11  -1   0 -2.4010  1.9359   2
 -11  -1   0 0.62795 2.29705   3
 -11   1   0 -2.4857  2.0671   3
 -11   1   0 0.76624 2.19717   2
 -12  -1   0 7.02094 3.50571   3
 -12   1   0 10.0979  3.5121   3
 -12   1   0 13.4817  3.2084   2
 -13  -1   0 -0.2250  2.5782   3
 -13   1   0 0.05459 2.77630   3
 -14  -1   0 0.33912 2.95775   3
 -14   1   0 -6.9513  2.6991   3
 -15  -1   0 -1.6613  2.9423   3
 -15   1   0 -1.2921  2.9291   3
  -1  -2   0 2.42759 0.44765   3
   1   2   0 2.58305 0.45816   1
  -1   2   0 2.51654 0.51103   2
  -2  -2   0 833.516  38.085   3
  -2   2   0 867.817  41.755   2
  -3  -2   0 0.07277 0.57744   3
  -3  -2   0 0.96818 0.44998   2
  -3   2   0 0.05542 0.49249   2
   3   2   0 0.29439 0.39949   1
  -4  -2   0 102.183   6.255   3
  -4  -2   0 117.772   6.442   2
   4   2   0 119.907   6.032   1
  -4   2   0 145.278   6.837   2
  -5  -2   0 1.03020 0.90031   3
   5   2   0 1.52562 0.62394   1
  -5   2   0 0.56934 0.84465   2
  -6  -2   0 103.011   5.955   2
  -6  -2   0 102.141   6.187   3
   6   2   0 102.253   5.361   1
  -6   2   0 99.3185  6.1364   2
  -7  -2   0 19.1965  2.7507   3
  -7  -2   0 17.1909  2.2616   2
   7   2   0 17.5617  1.7914   1
  -7   2   0 19.3289  2.4940   2
  -8  -2   0 23.3087  2.7389   2
  -8  -2   0 18.7302  3.0810   3
  -8   2   0 24.7212  2.9926   2
  -9  -2   0 -2.0757  1.5630   2
  -9  -2   0 -4.1254  1.7094   3
  -9   2   0 0.27767 1.79877   2
 -10  -2   0 19.0613  2.8999   2
 -10  -2   0 17.9703  3.4429   3
 -10   2   0 14.4184  2.8649   2
 -10   2   0 27.3579  3.6468   3
 -11  -2   0 12.5810  3.2821   3
 -11   2   0 13.2115  3.1377   2
 -11   2   0 12.1532  3.2577   3
 -12  -2   0 94.4739  7.3820   3
 -12   2   0 88.4010  7.0735   2
 -12   2   0 89.9618  7.3414   3
 -13  -2   0 -2.1208  2.7627   3
 -13   2   0 2.08510 2.86771   3
 -13   2   0 1.65292 2.51241   2
 -14  -2   0 27.4875  4.9026   3
 -14   2   0 28.8968  4.9010   3
 -15  -2   0 -2.8713  2.9560   3
 -15   2   0 4.01955 3.37741   3
   0  -3   0 -0.2791  0.2135   3
   0   3   0 0.47373 0.32076   1
  -1  -3   0 211.476   9.664   3
   1   3   0 212.662  10.027   1
  -1   3   0 207.552  10.641   2
  -2  -3   0 223.120  10.180   3
   2   3   0 203.798  10.377   1
  -2   3   0 225.075  11.151   2
  -3  -3   0 80.1355  4.2939   2
  -3  -3   0 78.9360  4.3632   3
  -3   3   0 78.4446  4.6664   2
   3   3   0 87.9113  4.2762   1
  -4  -3   0 397.424  19.229   3
  -4  -3   0 410.248  20.502   2
  -4   3   0 419.143  20.923   2
   4   3   0 421.730  19.496   1
  -5  -3   0 327.703  16.755   2
  -5  -3   0 327.026  15.957   3
  -5   3   0 332.193  17.166   2
   5   3   0 337.824  15.885   1
  -6  -3   0 517.191  23.762   3
  -6  -3   0 501.875  25.122   2
   6   3   0 489.473  23.666   1
  -6   3   0 493.606  25.494   2
  -7  -3   0 241.759  12.323   3
  -7  -3   0 245.564  12.472   2
  -7   3   0 218.002  12.727   2
   7   3   0 230.990  11.594   1
  -8  -3   0 220.500  12.026   2
  -8  -3   0 227.331  12.091   3
  -8   3   0 218.812  12.457   2
  -9  -3   0 112.887   7.580   3
  -9  -3   0 116.000   7.110   2
  -9   3   0 112.759   7.485   2
 -10  -3   0 19.9985  3.3550   3
 -10   3   0 11.4899  2.7124   2
 -11  -3   0 -1.0666  2.1357   3
 -11   3   0 2.43646 2.24000   3
 -11   3   0 3.10836 2.36646   2
 -12  -3   0 11.1516  3.6746   3
 -12   3   0 17.4238  3.5425   2
 -12   3   0 18.1290  3.8212   3
 -13  -3   0 -1.6419  2.6043   3
 -13   3   0 0.19206 2.50388   3
 -13   3   0 -0.1092  2.5630   2
 -14  -3   0 0.84419 2.68523   3
 -14   3   0 1.62342 2.86738   3
 -15  -3   0 4.15584 3.31936   3
 -15   3   0 2.14795 3.32242   3
   0  -4   0 471.176  22.305   3
   0   4   0 482.015  24.453   2
   0   4   0 540.046  23.223   1
  -1  -4   0 512.411  23.539   3
   1   4   0 510.417  24.457   1
  -1   4   0 542.104  24.359   1
  -1   4   0 531.165  25.915   2
  -2  -4   0 541.555  24.712   3
  -2   4   0 539.097  25.320   1
   2   4   0 564.677  25.595   1
  -2   4   0 541.439  27.150   2
  -3  -4   0 46.1691  2.8759   3
  -3  -4   0 48.3104  2.6162   2
  -3   4   0 48.1369  3.1348   2
  -4  -4   0 440.114  21.737   2
  -4  -4   0 424.135  20.415   3
  -4   4   0 436.855  22.293   2
   4   4   0 455.458  20.855   1
  -5  -4   0 7.41482 1.10274   2
  -5  -4   0 8.86111 1.58160   3
  -5   4   0 3.78793 1.32968   2
   5   4   0 7.99196 1.22801   1
  -6  -4   0 135.550   7.181   3
  -6  -4   0 116.422   6.800   2
  -6   4   0 126.800   7.429   2
   6   4   0 121.587   6.591   1
  -7  -4   0 0.47830 1.17777   2
  -7  -4   0 -0.1145  1.4948   3
  -7   4   0 -0.4772  1.3304   2
   7   4   0 -1.0498  0.8955   1
  -8  -4   0 10.2489  1.8441   2
  -8  -4   0 10.9117  2.4560   3
  -8   4   0 5.52090 2.07964   2
  -9  -4   0 1.02823 2.16783   3
  -9  -4   0 4.59272 1.64111   2
  -9   4   0 6.77188 2.19514   2
 -10  -4   0 6.10693 2.52783   3
 -10   4   0 2.23654 2.19979   2
 -11  -4   0 42.7452  5.2843   3
 -11   4   0 41.2713  4.9968   2
 -12  -4   0 71.5360  6.5113   3
 -12   4   0 70.4207  6.3421   3
 -12   4   0 68.1707  6.3294   2
 -13  -4   0 21.7315  4.3625   3
 -13   4   0 14.6987  3.6146   2
 -13   4   0 17.1936  3.9274   3
 -14  -4   0 8.57856 3.64959   3
 -14   4   0 10.0484  3.7706   3
 -14   4   0 17.2396  3.9565   2
 -15  -4   0 1.72267 3.51753   3
 -15   4   0 0.13718 3.47997   3
   0  -5   0 0.06822 0.34820   3
   0   5   0 0.09251 0.38241   2
   0   5   0 0.10221 0.41482   1
  -1  -5   0 428.805  19.182   3
  -1   5   0 405.069  21.077   2
  -1   5   0 424.140  19.828   1
   1   5   0 434.116  19.971   1
  -2  -5   0 206.373  10.017   3
   2   5   0 215.162  10.388   1
  -2   5   0 216.687  11.078   2
  -2   5   0 212.375  10.129   1
  -3  -5   0 51.8967  3.1586   3
   3   5   0 55.2938  3.1649   1
  -3   5   0 50.0567  3.4255   2
  -3   5   0 54.0405  2.7830   1
  -4  -5   0 400.747  20.044   2
  -4  -5   0 405.255  18.980   3
  -4   5   0 412.526  20.768   2
  -5  -5   0 286.110  13.993   3
  -5  -5   0 282.492  14.443   2
  -5   5   0 279.756  15.143   2
   5   5   0 298.676  14.094   1
  -6  -5   0 344.076  17.549   2
  -6  -5   0 348.003  16.923   3
   6   5   0 349.679  16.949   1
  -6   5   0 347.786  18.283   2
  -7  -5   0 506.730  23.652   3
  -7  -5   0 483.551  24.716   2
  -7   5   0 470.313  25.415   2
   7   5   0 508.484  23.711   1
  -8  -5   0 249.890  13.165   2
  -8  -5   0 253.498  13.201   3
   8   5   0 254.558  12.701   1
  -8   5   0 238.048  13.857   2
  -9  -5   0 77.9105  5.9345   3
  -9   5   0 82.8760  6.1392   2
 -10  -5   0 7.92049 2.67620   3
 -10   5   0 11.7980  2.8443   2
 -11  -5   0 -0.8121  2.2940   3
 -11   5   0 -3.2203  2.1673   2
 -12  -5   0 13.0938  3.5895   3
 -12   5   0 9.36650 3.42795   2
 -13  -5   0 -2.9448  2.8660   3
 -13   5   0 1.22566 2.76662   2
 -13   5   0 1.71615 2.54881   3
 -14  -5   0 -2.5081  2.5791   3
 -14   5   0 -1.1711  2.7343   2
 -14   5   0 5.05961 3.13562   3
 -15  -5   0 4.83404 3.61968   3
 -15   5   0 7.35905 3.54054   3
   0  -6   0 230.090  10.825   3
   0   6   0 231.012  11.260   1
   0   6   0 236.460  11.805   2
   1  -6   0 200.767   9.487   3
  -1  -6   0 206.253   9.410   3
  -1   6   0 168.525  10.248   2
   1   6   0 199.294  10.051   2
   1   6   0 206.301   9.839   1
  -1   6   0 216.887   9.730   1
  -2  -6   0 207.764   9.853   3
  -2   6   0 209.163   9.978   1
   2   6   0 209.533  10.232   1
  -2   6   0 201.078  10.845   2
  -3  -6   0 373.517  17.808   3
  -3   6   0 380.039  18.014   1
   3   6   0 381.509  18.404   1
  -3   6   0 401.286  19.651   2
  -4  -6   0 433.813  22.055   2
  -4  -6   0 452.834  20.898   3
  -4   6   0 453.509  22.897   2
   4   6   0 456.812  21.485   1
  -4   6   0 446.906  20.902   1
  -5  -6   0 47.4062  3.4488   3
  -5  -6   0 48.0892  2.9080   2
  -5   6   0 52.6287  3.8840   2
  -6  -6   0 23.5580  1.9788   2
  -6  -6   0 29.4187  2.9657   3
   6   6   0 25.4778  2.3543   1
  -6   6   0 23.8732  2.8785   2
  -7  -6   0 5.25743 1.18600   2
  -7  -6   0 7.00827 1.94748   3
  -7   6   0 3.73239 1.76318   2
   7   6   0 6.23457 1.51929   1
  -8  -6   0 -0.4225  1.5514   3
   8   6   0 0.78992 1.15831   1
  -8   6   0 -1.7453  1.7395   2
  -9  -6   0 15.4610  2.9589   3
  -9   6   0 15.5945  2.9312   2
 -10  -6   0 18.4719  3.4051   3
 -10   6   0 17.8183  3.4166   2
 -11  -6   0 40.2049  5.0073   3
 -11   6   0 33.7730  4.7399   2
 -12  -6   0 37.3030  5.1444   3
 -12   6   0 33.9485  4.9866   2
 -13  -6   0 53.7875  6.1264   3
 -13   6   0 43.6075  5.6970   2
 -14  -6   0 4.77740 3.31096   3
 -14   6   0 2.69594 2.87401   3
 -14   6   0 3.62115 3.24397   2
   0  -7   0 0.03211 0.43137   3
   0   7   0 0.76252 0.56575   1
   0   7   0 -0.0995  0.4984   2
   1  -7   0 4.67979 0.90259   3
  -1  -7   0 5.36805 0.88061   3
  -1   7   0 5.25972 0.88785   1
   1   7   0 6.33271 1.03243   1
   1   7   0 5.03772 0.75667   2
  -1   7   0 3.69322 0.83811   2
  -2  -7   0 81.8926  4.5010   3
   2   7   0 83.7656  4.7221   1
  -2   7   0 84.7882  4.4811   1
  -2   7   0 87.6891  5.0646   2
  -3  -7   0 500.307  22.716   3
  -3   7   0 500.618  23.125   1
   3   7   0 491.415  23.515   1
  -3   7   0 478.088  24.939   2
  -4  -7   0 166.532   8.606   2
  -4  -7   0 169.539   8.678   3
  -4   7   0 176.964   9.558   2
  -4   7   0 169.459   8.299   1
   4   7   0 171.681   8.867   1
  -5  -7   0 86.0716  4.9173   2
  -5  -7   0 90.2315  5.4036   3
  -5   7   0 100.924   6.016   2
  -5   7   0 96.0051  4.6787   1
   5   7   0 92.1966  5.3727   1
  -6  -7   0 95.7975  5.6837   3
  -6  -7   0 84.8864  5.0236   2
  -6   7   0 96.3412  6.0968   2
   6   7   0 94.5994  5.4959   1
  -7  -7   0 311.023  15.393   3
  -7   7   0 307.877  16.681   2
   7   7   0 299.869  15.388   1
  -8  -7   0 92.4582  6.3497   3
  -8   7   0 96.7341  6.7831   2
   8   7   0 103.691   6.141   1
  -9  -7   0 72.0974  5.4730   3
  -9   7   0 61.5281  5.3842   2
 -10  -7   0 18.5947  3.2549   3
 -10   7   0 11.6405  3.0823   2
 -11  -7   0 3.32541 2.69743   3
 -11   7   0 0.70003 2.55843   2
 -12  -7   0 13.6233  3.6144   3
 -12   7   0 8.11803 3.30256   2
 -13  -7   0 -0.5079  2.5259   3
 -13   7   0 2.82530 2.82892   2
 -14  -7   0 1.10096 3.01154   3
 -14   7   0 -0.4035  3.0826   2
 -14   7   0 4.33106 2.99566   3
   0  -8   0 86.8963  4.7187   3
   0   8   0 93.3544  5.0936   2
   0   8   0 88.3862  4.9246   1
  -1  -8   0 273.004  12.760   3
   1  -8   0 260.159  12.828   3
   1   8   0 289.223  13.748   2
  -1   8   0 265.190  13.186   1
   1   8   0 268.243  13.325   1
  -2  -8   0 36.9002  2.5006   3
   2   8   0 38.2180  2.2945   2
  -2   8   0 37.0664  2.8141   2
   2   8   0 36.6405  2.6630   1
  -2   8   0 37.2408  2.4501   1
  -3  -8   0 559.577  26.160   3
  -3   8   0 590.562  26.796   1
   3   8   0 572.554  27.187   1
  -3   8   0 556.276  28.778   2
  -4  -8   0 47.9481  3.3118   3
   4   8   0 50.1165  3.4166   1
  -4   8   0 48.4289  2.8661   1
  -4   8   0 45.9785  3.6599   2
  -5  -8   0 108.532   6.000   3
  -5  -8   0 99.3697  5.4003   2
  -5   8   0 104.956   5.281   1
  -5   8   0 99.4809  6.4718   2
   5   8   0 104.206   5.992   1
  -6  -8   0 18.3150  2.4441   3
  -6   8   0 18.2697  2.6775   2
  -7  -8   0 3.46147 1.64461   3
   7   8   0 3.31658 1.51349   1
  -7   8   0 4.72295 1.95024   2
  -8  -8   0 1.71968 1.51929   3
   8   8   0 -0.9133  1.2394   1
  -8   8   0 -0.6663  1.7190   2
  -9  -8   0 52.6496  4.7886   3
  -9   8   0 48.4468  4.7558   2
 -10  -8   0 21.4319  3.4670   3
 -10   8   0 16.3236  3.4132   2
 -11  -8   0 64.5829  5.7259   3
 -11   8   0 55.5873  5.8151   2
 -12  -8   0 7.20296 3.17518   3
 -12   8   0 6.31674 3.33685   2
 -13  -8   0 37.4192  5.2876   3
 -13   8   0 31.7713  5.1349   2
 -14  -8   0 3.63997 2.98691   3
 -14   8   0 1.27470 3.19542   2
   0  -9   0 -0.2343  0.6408   3
   0   9   0 -1.5907  0.7518   1
   0   9   0 -0.0189  0.7479   2
   1  -9   0 0.53557 0.77763   3
  -1  -9   0 2.24769 0.78451   3
  -1   9   0 1.27013 0.83753   1
   1   9   0 0.26563 0.82339   1
   1   9   0 0.81771 0.66859   2
  -1   9   0 0.04354 0.41904   2
  -2  -9   0 6.43217 1.18132   3
   2   9   0 3.31592 1.22693   1
  -2   9   0 3.65628 1.20988   2
   2   9   0 5.54091 0.86989   2
  -2   9   0 6.17357 1.13230   1
  -3  -9   0 363.429  16.525   3
   3   9   0 343.623  17.121   1
  -3   9   0 349.211  16.721   1
  -3   9   0 336.297  18.097   2
  -4  -9   0 50.1792  3.3513   3
  -4   9   0 46.5710  2.9011   1
   4   9   0 47.3246  3.4411   1
  -4   9   0 42.8331  3.5842   2
  -5  -9   0 327.496  16.003   2
  -5  -9   0 312.332  15.612   3
  -5   9   0 317.983  15.374   1
   5   9   0 316.147  16.099   1
  -5   9   0 332.700  17.257   2
  -6  -9   0 28.5437  3.1177   3
   6   9   0 34.9118  3.0212   1
  -6   9   0 29.4263  3.4642   2
  -7  -9   0 167.916   9.061   3
  -7   9   0 156.365   9.810   2
  -8  -9   0 19.4933  2.8361   3
  -8   9   0 17.2002  3.1194   2
   8   9   0 14.7779  2.5201   1
  -9  -9   0 108.750   7.343   3
   9   9   0 108.975   7.300   1
  -9   9   0 110.221   7.801   2
 -10  -9   0 23.6187  3.7268   3
 -10   9   0 31.1424  4.3210   2
 -11  -9   0 21.4573  3.7998   3
 -11   9   0 12.9455  3.2820   2
 -12  -9   0 1.15290 2.45592   3
 -12   9   0 -1.2434  2.7134   2
 -13  -9   0 6.00781 3.13953   3
 -13   9   0 2.98579 3.18453   2
 -14  -9   0 -0.0816  3.0450   3
 -14   9   0 1.09524 3.11329   2
   0 -10   0 10.6007  1.5054   3
   0  10   0 10.0915  1.7127   1
   0  10   0 12.9298  1.6443   2
   1 -10   0 949.306  42.053   3
  -1 -10   0 917.005  41.908   3
   1  10   0 910.831  43.624   1
   1  10   0 938.300  45.673   2
  -1  10   0 922.739  43.499   1
  -2 -10   0 124.858   6.469   3
   2  10   0 118.682   6.788   1
  -2  10   0 120.298   7.117   2
  -2  10   0 124.368   6.586   1
   2  10   0 122.930   6.526   2
  -3 -10   0 202.915   9.813   3
   3  10   0 183.412   9.860   2
  -3  10   0 194.126  10.801   2
   3  10   0 196.596  10.246   1
  -3  10   0 201.505   9.844   1
  -4 -10   0 5.17648 1.45314   3
  -4  10   0 6.54987 1.80402   2
  -4  10   0 7.68348 1.30463   1
   4  10   0 8.89545 1.78079   1
  -5 -10   0 96.7652  5.9623   3
  -5  10   0 101.387   6.678   2
   5  10   0 103.365   6.191   1
  -5  10   0 105.861   5.526   1
  -6 -10   0 0.39745 1.20470   3
   6  10   0 3.06964 1.39057   1
  -6  10   0 0.05224 1.57531   2
  -7 -10   0 3.43439 1.80667   3
  -7  10   0 5.75462 2.20915   2
   7  10   0 7.82518 1.87887   1
  -8 -10   0 0.05239 1.52931   3
  -8  10   0 -1.8153  2.0356   2
   8  10   0 0.24254 1.36236   1
  -9 -10   0 56.7659  4.9674   3
  -9  10   0 59.3511  5.6718   2
   9  10   0 61.9916  4.9039   1
 -10 -10   0 5.73382 2.54426   3
 -10  10   0 2.13357 2.74363   2
 -11 -10   0 41.1334  4.9948   3
 -11  10   0 45.7777  5.4700   2
 -12 -10   0 1.28157 2.48018   3
 -12  10   0 0.21565 2.90210   2
 -13 -10   0 32.5103  4.8651   3
 -13  10   0 26.7023  4.8546   2
 -14 -10   0 1.91011 3.05688   3
 -14  10   0 0.03908 3.20986   2
   0 -11   0 0.69765 1.07234   3
   0  11   0 -2.4744  1.0459   1
   0  11   0 -2.2068  0.9538   2
  -1 -11   0 176.476   8.771   3
   1 -11   0 172.259   8.854   3
  -1  11   0 168.771   9.010   1
  -1  11   0 167.044   9.452   2
   1  11   0 171.790   9.188   1
   1  11   0 178.799   9.209   2
  -2 -11   0 -1.0740  0.8453   3
   2  11   0 0.49080 1.21084   1
  -2  11   0 -1.0248  0.8320   1
   2  11   0 0.84375 0.75875   2
  -2  11   0 -0.3974  1.0893   2
  -3 -11   0 275.003  13.043   3
   3  11   0 256.571  13.353   2
  -3  11   0 268.030  14.345   2
  -3  11   0 263.807  13.184   1
   3  11   0 268.197  13.617   1
  -4 -11   0 11.6846  1.9179   3
   4  11   0 9.33932 1.85308   1
  -4  11   0 9.65230 2.08558   2
  -4  11   0 11.0042  1.5790   1
  -5 -11   0 261.895  13.198   3
  -5  11   0 267.159  14.636   2
  -5  11   0 261.939  12.966   1
   5  11   0 263.045  13.719   1
  -6 -11   0 -0.6499  1.1514   3
  -6  11   0 0.03884 1.62129   2
   6  11   0 -0.7097  1.1295   1
  -7 -11   0 99.9023  6.2458   3
   7  11   0 96.3161  6.3554   1
  -7  11   0 93.2170  6.7834   2
  -8 -11   0 2.33758 1.83268   3
  -8  11   0 1.46991 2.28718   2
   8  11   0 2.99518 1.59027   1
  -9 -11   0 115.087   7.558   3
   9  11   0 119.967   7.651   1
  -9  11   0 110.212   8.203   2
 -10 -11   0 10.6599  2.9555   3
 -10  11   0 5.81240 2.89544   2
 -11 -11   0 12.0451  3.1244   3
 -11  11   0 12.5247  3.4285   2
 -12 -11   0 1.69119 2.57096   3
 -12  11   0 -3.2452  2.4472   2
 -13 -11   0 1.30609 2.66587   3
 -13  11   0 3.97054 3.10030   2
 -14 -11   0 -2.3784  2.7357   3
 -14  11   0 -1.8789  3.0754   2
   0 -12   0 23.1373  2.4768   3
   0  12   0 24.0098  2.3098   2
   0  12   0 26.0807  2.4936   1
   1 -12   0 573.701  26.506   3
  -1 -12   0 564.647  26.383   3
  -1  12   0 578.953  28.878   2
  -1  12   0 554.669  27.367   1
   1  12   0 588.915  28.570   2
   1  12   0 563.431  27.532   1
  -2 -12   0 5.62351 1.36942   3
   2  12   0 7.57944 1.66366   1
  -2  12   0 7.03696 1.49295   1
  -2  12   0 2.85281 1.41585   2
   2  12   0 5.93140 1.08413   2
  -3 -12   0 380.883  18.663   3
  -3  12   0 400.735  19.152   1
  -3  12   0 404.669  20.610   2
   3  12   0 382.985  19.513   1
  -4 -12   0 5.18484 1.54268   3
  -4  12   0 5.68268 1.84676   2
   4  12   0 3.39592 1.68411   1
  -4  12   0 3.53974 1.34056   1
  -5 -12   0 13.4495  2.2165   3
  -5  12   0 14.1719  2.5515   2
  -5  12   0 16.0395  1.8988   1
   5  12   0 11.8441  2.2463   1
  -6 -12   0 -0.5020  1.2002   3
  -6  12   0 -1.6088  1.4675   2
   6  12   0 -0.8762  1.2646   1
  -7 -12   0 -0.5346  1.4540   3
   7  12   0 0.38710 1.50159   1
  -7  12   0 0.17505 1.87346   2
  -8 -12   0 -0.3004  1.5505   3
  -8  12   0 -3.1088  2.0468   2
   8  12   0 0.27643 1.60214   1
  -9 -12   0 74.6947  5.8735   3
  -9  12   0 74.2952  6.4964   2
 -10 -12   0 1.83192 2.17865   3
 -10  12   0 -1.3839  2.3772   2
 -11 -12   0 38.2062  4.8851   3
 -11  12   0 40.6465  5.3483   2
 -12 -12   0 -0.0818  2.6086   3
 -12  12   0 -0.5610  3.0257   2
 -13 -12   0 19.1874  3.9959   3
 -13  12   0 19.0959  4.6374   2
   0 -13   0 -1.6597  0.8612   3
   0  13   0 -1.4448  1.0559   1
   0  13   0 -0.6710  1.0064   2
   1 -13   0 0.23657 0.98024   3
  -1 -13   0 -2.6538  0.8849   3
   1  13   0 -0.8995  1.0865   1
  -1  13   0 0.36105 1.06729   1
  -1  13   0 0.99136 1.10885   2
   1  13   0 -0.9417  0.8393   2
  -2 -13   0 -0.1902  1.0926   3
   2  13   0 -1.5803  1.2901   1
  -2  13   0 -2.7505  1.1564   1
  -2  13   0 -0.7524  1.3093   2
   2  13   0 -1.1618  0.8769   2
  -3 -13   0 91.8154  5.7034   3
  -3  13   0 93.7728  6.2759   2
  -3  13   0 103.166   5.821   1
   3  13   0 95.3535  6.1084   1
  -4 -13   0 20.9043  2.6625   3
  -4  13   0 17.8375  2.8283   2
  -4  13   0 21.9696  2.4108   1
   4  13   0 20.1925  2.8493   1
  -5 -13   0 152.216   8.336   3
   5  13   0 154.762   8.844   1
  -5  13   0 136.046   9.118   2
  -5  13   0 152.126   8.046   1
  -6 -13   0 12.8522  2.3545   3
  -6  13   0 12.8516  2.7855   2
   6  13   0 12.0746  2.4054   1
  -7 -13   0 26.9890  3.2417   3
  -7  13   0 18.5548  3.3817   2
   7  13   0 25.9931  3.4641   1
  -8 -13   0 9.96197 2.61577   3
  -8  13   0 8.91932 3.03976   2
   8  13   0 13.7981  2.8626   1
  -9 -13   0 69.2970  5.6653   3
   9  13   0 79.1064  6.0802   1
  -9  13   0 70.2183  6.4764   2
 -10 -13   0 -3.6346  2.1140   3
 -10  13   0 -0.7245  2.5064   2
 -11 -13   0 11.2135  3.2295   3
 -11  13   0 8.81032 3.29120   2
 -12 -13   0 -1.0154  2.2197   3
 -12  13   0 -3.2528  2.6628   2
 -13 -13   0 0.42316 2.77905   3
 -13  13   0 -3.2618  2.8390   2
   0 -14   0 64.7289  4.4541   3
   0  14   0 70.2908  4.5891   2
   0  14   0 69.6875  4.7607   1
   1 -14   0 223.177  11.085   3
  -1 -14   0 213.407  10.947   3
   1  14   0 208.416  11.450   1
   1  14   0 207.493  11.415   2
  -1  14   0 216.845  11.407   1
  -1  14   0 218.951  11.818   2
  -2 -14   0 57.0673  3.9212   3
  -2  14   0 40.5037  3.8232   2
   2  14   0 58.9458  4.2931   1
  -2  14   0 59.8814  4.1403   1
  -3 -14   0 177.542   9.382   3
   3  14   0 163.762   9.812   1
  -3  14   0 178.817  10.310   2
  -3  14   0 181.187   9.514   1
  -4 -14   0 24.7595  2.9481   3
  -4  14   0 27.8338  2.9232   1
  -4  14   0 22.3969  3.2555   2
   4  14   0 20.0684  3.1452   1
  -5  14   0 7.60094 1.91673   1
  -5  14   0 2.04318 1.97585   2
   5  14   0 9.51591 2.31577   1
  -6 -14   0 0.18339 1.51648   3
   6  14   0 1.08511 1.74448   1
  -6  14   0 0.98735 1.98651   2
  -7 -14   0 1.50517 1.77874   3
  -7  14   0 -2.7322  1.8691   2
   7  14   0 2.78958 1.94246   1
  -8 -14   0 11.0041  2.7073   3
  -8  14   0 3.38232 2.75856   2
   8  14   0 6.94809 2.46557   1
  -9 -14   0 23.5142  3.6235   3
   9  14   0 28.7247  3.9757   1
  -9  14   0 20.4031  3.9560   2
 -10 -14   0 9.86958 2.97587   3
 -10  14   0 5.02334 3.14256   2
 -11 -14   0 20.3582  3.7983   3
 -11  14   0 17.3764  3.9457   2
 -12 -14   0 7.47532 3.22104   3
 -12  14   0 12.3274  3.9737   2
 -13 -14   0 12.9842  3.8802   3
 -13  14   0 11.5341  3.9720   2
   0 -15   0 0.51835 1.16082   3
   0  15   0 0.24260 1.22364   2
   0  15   0 -2.6405  1.2068   1
   1 -15   0 -1.3319  1.0982   3
  -1 -15   0 1.77201 1.25062   3
  -1  15   0 -0.8131  1.3855   1
  -1  15   0 -1.7131  1.1697   2
   1  15   0 -0.7639  1.0821   2
   1  15   0 1.18676 1.59296   1
  -2 -15   0 39.6840  3.4357   3
  -2  15   0 44.3647  3.7156   1
   2  15   0 38.2165  3.7750   1
  -3 -15   0 154.440   8.167   3
  -3  15   0 146.305   8.146   1
  -3  15   0 141.871   8.837   2
   3  15   0 130.742   8.457   1
  -4 -15   0 72.4396  4.9467   3
  -4  15   0 66.4925  5.3217   2
   4  15   0 67.4436  5.3075   1
  -4  15   0 62.3551  4.6248   1
  -5 -15   0 166.380   8.830   3
  -5  15   0 122.021   9.201   2
   5  15   0 163.907   9.288   1
  -6 -15   0 66.2604  4.9134   3
   6  15   0 59.2996  5.1008   1
  -6  15   0 51.2793  5.1470   2
  -7 -15   0 37.7100  4.0674   3
   7  15   0 33.0390  4.2003   1
  -7  15   0 32.1745  4.5671   2
  -8 -15   0 51.4049  5.0712   3
   8  15   0 48.5811  5.4005   1
  -8  15   0 44.1144  5.4149   2
  -9 -15   0 49.7342  5.1309   3
   9  15   0 45.3609  5.3883   1
  -9  15   0 45.5109  5.6931   2
 -10 -15   0 3.94261 2.46182   3
  10  15   0 7.26782 3.09785   1
 -10  15   0 6.48364 3.17171   2
 -11 -15   0 8.02405 3.00372   3
 -11  15   0 4.38358 3.54854   2
 -12 -15   0 -0.2528  2.6609   3
 -12  15   0 0.05663 3.15418   2
   0 -16   0 88.7707  5.7976   3
   0  16   0 95.7472  5.9629   2
   0  16   0 96.3916  6.1913   1
   1 -16   0 21.8396  2.7452   3
  -1 -16   0 19.5358  2.6461   3
  -1  16   0 22.9882  3.0221   1
   1  16   0 24.4273  3.1703   1
  -1  16   0 24.3561  2.8860   2
  -2 -16   0 23.0995  2.9726   3
   2  16   0 28.3982  3.5335   1
  -2  16   0 30.0088  3.3576   1
  -3 -16   0 222.172  11.702   3
  -3  16   0 223.877  11.919   1
   3  16   0 208.881  12.271   1
  -3  16   0 229.104  12.754   2
  -4 -16   0 36.3659  3.8158   3
  -4  16   0 38.3557  3.6949   1
  -4  16   0 31.3716  4.0589   2
   4  16   0 28.0115  3.6578   1
  -5 -16   0 16.2046  2.7809   3
  -5  16   0 6.14292 2.49704   2
   5  16   0 13.1300  2.9005   1
  -6 -16   0 5.05392 2.22670   3
   6  16   0 13.2310  2.9425   1
  -6  16   0 11.9532  3.1543   2
  -7 -16   0 -2.9134  1.7038   3
  -7  16   0 -3.4512  2.1986   2
   7  16   0 -2.9113  1.9092   1
  -8 -16   0 4.24797 2.23397   3
  -8  16   0 2.85738 2.71154   2
   8  16   0 10.0800  2.9905   1
  -9 -16   0 6.65797 2.60428   3
  -9  16   0 6.24682 3.10381   2
   9  16   0 3.37833 2.72030   1
 -10 -16   0 5.76714 2.95403   3
 -10  16   0 8.87689 3.57936   2
  10  16   0 1.76658 2.99744   1
 -11 -16   0 9.03104 3.10178   3
 -11  16   0 9.13589 3.66531   2
 -12 -16   0 8.12071 3.25662   3
 -12  16   0 15.0350  4.5303   2
   0 -17   0 -0.0003  1.2624   3
   0  17   0 0.57918 1.61457   1
   1 -17   0 20.1429  2.7231   3
  -1 -17   0 14.5750  2.5353   3
  -1  17   0 14.8624  2.7472   1
   1  17   0 19.4507  3.0287   1
  -1  17   0 15.7845  2.6176   2
  -2 -17   0 29.7165  3.4604   3
  -2  17   0 24.1904  3.3888   2
   2  17   0 31.6956  3.8538   1
  -2  17   0 34.4952  3.8145   1
  -3 -17   0 68.4181  5.2920   3
  -3  17   0 65.6643  5.4923   2
   3  17   0 62.5521  5.4492   1
  -3  17   0 81.1936  5.4254   1
  -4 -17   0 60.2485  4.7107   3
  -4  17   0 55.9934  4.4772   1
   4  17   0 54.2371  5.1028   1
  -4  17   0 51.2258  4.9659   2
  -5 -17   0 36.8305  4.0826   3
   5  17   0 28.2459  4.1410   1
  -5  17   0 46.3207  4.8308   2
  -6 -17   0 61.9080  5.1368   3
  -6  17   0 62.2509  5.7980   2
   6  17   0 60.7559  5.5767   1
  -7 -17   0 32.5295  3.9533   3
  -7  17   0 27.4581  4.4515   2
   7  17   0 30.7290  4.5266   1
  -8 -17   0 36.2365  4.3551   3
  -8  17   0 34.0122  4.9118   2
   8  17   0 40.3500  5.0550   1
  -9 -17   0 27.7673  4.0942   3
  -9  17   0 28.2533  4.7457   2
   9  17   0 25.7087  4.5971   1
 -10 -17   0 15.2498  3.5357   3
 -10  17   0 10.5569  3.6985   2
  10  17   0 4.79996 3.14450   1
 -11 -17   0 1.49528 2.69831   3
 -11  17   0 1.28015 3.04832   2
 -12 -17   0 -1.2547  2.7831   3
 -12  17   0 1.52464 3.54076   2
   0 -18   0 32.7748  3.6273   3
   0  18   0 33.2048  4.0059   1
  -1 -18   0 -4.2645  1.3495   3
   1 -18   0 0.38931 1.63133   3
  -1  18   0 -0.9370  1.6231   2
  -1  18   0 -4.9293  1.5113   1
   1  18   0 -0.6474  1.8352   1
  -2 -18   0 46.6988  4.2099   3
  -2  18   0 54.2383  4.6895   2
  -2  18   0 52.3064  4.6135   1
   2  18   0 46.4593  4.5692   1
  -3 -18   0 56.0023  4.6953   3
   3  18   0 51.8683  5.0628   1
  -3  18   0 64.3747  4.9808   1
  -3  18   0 55.4188  5.1381   2
  -4 -18   0 71.3069  5.2890   3
  -4  18   0 63.6410  5.5457   2
   4  18   0 65.1569  5.6562   1
  -4  18   0 68.5862  5.1764   1
  -5 -18   0 0.18299 2.14839   3
   5  18   0 -3.3917  2.1066   1
  -5  18   0 -1.0467  2.0760   2
  -6 -18   0 0.19323 1.97330   3
  -6  18   0 0.13945 2.58016   2
   6  18   0 3.82506 2.65845   1
  -7 -18   0 1.52658 2.26289   3
  -7  18   0 -3.1053  2.2989   2
   7  18   0 -0.3590  2.4840   1
  -8 -18   0 2.86711 2.31679   3
  -8  18   0 3.08957 2.90872   2
   8  18   0 5.85362 2.80661   1
  -9 -18   0 3.21401 2.45603   3
  -9  18   0 -1.9163  2.7298   2
   9  18   0 0.35869 2.84646   1
 -10 -18   0 6.02079 3.01619   3
 -10  18   0 6.90107 3.39321   2
  10  18   0 6.89374 3.31845   1
 -11 -18   0 0.24448 2.47353   3
 -11  18   0 -0.5817  3.0173   2
   0 -19   0 -1.8733  1.6792   3
   0  19   0 -3.7411  1.7511   1
  -1 -19   0 2.13782 1.86865   3
  -1  19   0 -1.4923  1.8815   1
   1  19   0 -0.0918  1.9898   1
  -2 -19   0 42.2984  4.2715   3
   2  19   0 39.8053  4.6090   1
  -2  19   0 38.3906  4.3286   1
  -2  19   0 36.9836  4.3758   2
  -3 -19   0 2.37420 1.98397   3
  -3  19   0 0.70687 2.02569   2
   3  19   0 -0.4323  2.0743   1
  -3  19   0 1.22581 2.06313   1
  -4 -19   0 46.6687  4.7856   3
  -4  19   0 52.2477  4.5861   1
   4  19   0 41.9389  5.0674   1
  -4  19   0 45.7360  5.0711   2
  -5 -19   0 3.74952 2.15316   3
  -5  19   0 0.48004 2.48208   2
   5  19   0 -0.6430  2.3437   1
  -6 -19   0 45.8208  4.9329   3
  -6  19   0 57.2849  6.1918   2
   6  19   0 49.8429  5.7137   1
  -7 -19   0 7.97856 2.70053   3
   7  19   0 13.2033  3.5624   1
  -7  19   0 9.40106 3.45747   2
  -8 -19   0 26.7608  4.1333   3
   8  19   0 31.1686  5.0052   1
  -8  19   0 32.2463  5.2084   2
  -9 -19   0 6.79375 3.02756   3
   9  19   0 4.46743 3.43903   1
  -9  19   0 7.60093 3.65603   2
 -10 -19   0 7.02527 3.13795   3
  10  19   0 10.7385  3.7438   1
 -10  19   0 7.10354 3.78002   2
 -11 -19   0 -1.4310  2.5566   3
 -11  19   0 0.00526 3.37507   2
   0 -20   0 64.4804  5.2150   3
   0  20   0 60.7357  5.3998   1
  -1 -20   0 4.78119 2.20177   3
  -1  20   0 8.17849 2.67050   1
   1  20   0 6.72943 2.56039   1
  -2 -20   0 115.602   7.367   3
   2  20   0 106.696   7.774   1
  -2  20   0 112.581   7.593   1
  -3 -20   0 1.81926 2.28377   3
  -3  20   0 1.25091 2.24730   1
  -3  20   0 0.18072 1.66196   2
   3  20   0 0.76912 2.31078   1
  -4 -20   0 33.3552  4.1223   3
  -4  20   0 32.4904  4.3907   2
   4  20   0 25.2090  4.1340   1
  -5 -20   0 1.44879 2.12047   3
  -5  20   0 -1.2211  2.4862   2
   5  20   0 -0.2624  2.3922   1
  -6 -20   0 -0.4535  2.2465   3
   6  20   0 2.48299 2.75380   1
  -6  20   0 1.28663 2.85991   2
  -7 -20   0 -2.1243  2.0496   3
   7  20   0 3.92771 3.23664   1
  -7  20   0 -0.3958  2.7640   2
  -8 -20   0 12.6717  3.3023   3
   8  20   0 4.70213 3.26972   1
  -8  20   0 8.50011 3.46604   2
  -9 -20   0 -0.4116  2.3267   3
   9  20   0 -0.2619  3.2741   1
  -9  20   0 3.07143 3.31796   2
 -10 -20   0 3.46608 2.87423   3
  10  20   0 2.55022 3.29498   1
 -10  20   0 7.80848 3.94132   2
   0 -21   0 1.52295 2.06104   3
   0  21   0 -1.3960  2.3214   1
  -1 -21   0 -1.6770  2.0768   3
   1  21   0 -4.2032  2.0961   1
  -1  21   0 0.49725 2.31042   1
  -2 -21   0 7.95915 2.70339   3
   2  21   0 9.48505 3.19169   1
  -2  21   0 10.2577  2.8318   1
  -3 -21   0 0.14015 1.96329   3
  -3  21   0 -1.0984  1.3177   2
  -3  21   0 2.37922 2.61796   1
   3  21   0 -2.4597  2.2169   1
  -4 -21   0 23.3147  3.7808   3
   4  21   0 17.4762  3.7571   1
  -4  21   0 25.6741  4.1066   2
  -5 -21   0 1.65743 2.14471   3
  -5  21   0 3.24876 2.76263   2
   5  21   0 -2.2402  2.2308   1
  -6 -21   0 25.2221  3.9984   3
  -6  21   0 28.7084  4.7188   2
   6  21   0 27.7915  4.5834   1
  -7 -21   0 1.76391 2.66331   3
   7  21   0 4.70052 3.15345   1
  -7  21   0 -5.1382  2.7706   2
  -8 -21   0 14.2289  3.3910   3
   8  21   0 14.2852  4.1014   1
  -8  21   0 21.3370  4.5624   2
  -9 -21   0 -0.2779  2.5011   3
  -9  21   0 1.41440 3.40889   2
   9  21   0 0.45238 3.27586   1
 -10 -21   0 10.9624  3.5156   3
  10  21   0 6.96232 3.68358   1
 -10  21   0 5.48736 3.97484   2
   0 -22   0 78.6237  6.1425   3
   0  22   0 80.5180  6.6362   1
  -1 -22   0 7.17603 2.58801   3
  -1  22   0 5.15163 2.80848   1
  -2 -22   0 50.9719  5.1416   3
  -2  22   0 49.6830  5.3341   1
   2  22   0 40.5139  5.1704   1
  -3 -22   0 0.00137 2.31003   3
   3  22   0 -0.2887  2.6027   1
  -3  22   0 -1.4874  2.4776   1
  -4 -22   0 11.0943  2.9628   3
  -4  22   0 7.58114 3.20729   2
   4  22   0 8.12053 3.20358   1
  -5 -22   0 -1.0697  2.2435   3
  -5  22   0 3.56778 2.99866   2
   5  22   0 0.42924 2.75772   1
  -6 -22   0 2.80350 2.37020   3
  -6  22   0 1.08975 3.00120   2
   6  22   0 0.83467 2.76860   1
  -7 -22   0 1.37079 2.61513   3
   7  22   0 -2.9917  2.7955   1
  -7  22   0 -0.5891  2.7154   2
  -8 -22   0 -0.1194  2.5335   3
   8  22   0 -0.3620  3.1431   1
  -8  22   0 2.23644 3.17921   2
  -9 -22   0 1.54532 2.94859   3
   9  22   0 -3.5951  3.3108   1
  -9  22   0 -3.4805  3.3417   2
   0 -23   0 0.77959 2.30193   3
   0  23   0 1.55202 2.65355   1
  -1 -23   0 -0.5118  2.2905   3
  -1  23   0 -3.5963  2.3736   1
   1  23   0 -3.1172  2.4876   1
  -2 -23   0 3.71435 2.49677   3
  -2  23   0 3.85385 2.92729   1
   2  23   0 1.89183 2.68129   1
  -3 -23   0 2.12330 2.35732   3
  -3  23   0 -2.3750  2.5142   1
   3  23   0 1.01239 2.74163   1
  -4 -23   0 14.5040  3.4795   3
   4  23   0 15.5677  3.7291   1
  -5 -23   0 5.19320 2.65183   3
  -5  23   0 1.66105 2.96888   2
   5  23   0 4.47328 2.93989   1
  -6 -23   0 21.1617  3.8159   3
   6  23   0 22.9844  4.7291   1
  -6  23   0 20.1009  4.5538   2
  -7 -23   0 -1.3024  2.4223   3
   7  23   0 -2.1177  3.3090   1
  -7  23   0 -2.2008  3.1886   2
  -8 -23   0 3.44584 2.84911   3
   8  23   0 7.67572 4.09297   1
  -8  23   0 6.05872 3.90147   2
   0  24   0 41.6831  5.4276   1
  -1 -24   0 9.87753 3.13467   3
  -1  24   0 4.40884 3.00996   1
   1  24   0 12.9261  3.5415   1
  -2 -24   0 16.9161  3.4956   3
  -2  24   0 16.2433  4.0530   1
   2  24   0 19.1082  4.0542   1
  -3 -24   0 3.42749 2.66644   3
  -3  24   0 3.36400 2.97177   1
   3  24   0 6.52286 3.25121   1
  -4 -24   0 5.87940 2.78696   3
   4  24   0 1.77024 3.08890   1
  -5 -24   0 -1.1656  2.4500   3
   5  24   0 3.07975 3.22836   1
  -6 -24   0 2.08412 2.65644   3
  -6  24   0 -0.7716  3.0428   2
   6  24   0 -0.4797  3.2076   1
  -7 -24   0 -2.4080  2.5422   3
   7  24   0 -0.0933  3.2301   1
  -7  24   0 -2.8279  3.0558   2
   0  25   0 3.10490 3.33072   1
  -1 -25   0 2.04917 2.63336   3
  -1  25   0 -1.4608  2.8399   1
   1  25   0 5.40743 3.63667   1
  -2 -25   0 0.41318 2.59512   3
   2  25   0 0.25905 2.96901   1
  -2  25   0 -0.4708  2.8263   1
  -3 -25   0 6.24372 2.94913   3
   3  25   0 4.74676 3.34269   1
  -4 -25   0 3.81854 2.88638   3
   4  25   0 10.9028  3.6919   1
  -5 -25   0 7.11209 3.02926   3
   5  25   0 4.36610 3.51747   1
  -6 -25   0 4.47312 2.95464   3
   6  25   0 4.30612 3.84111   1
   0  26   0 15.9785  4.2449   1
  -1 -26   0 10.0374  3.4722   3
  -1  26   0 7.67865 3.84742   1
   1  26   0 14.1773  4.1059   1
  -2 -26   0 13.2490  3.8603   3
  -2  26   0 11.1743  3.7401   1
   2  26   0 6.95085 3.76483   1
  -3 -26   0 0.82343 2.88977   3
   3  26   0 2.12352 3.48640   1
  -4 -26   0 5.92381 3.33617   3
   4  26   0 18.8480  4.6297   1
  -5 -26   0 1.57459 2.92116   3
   5  26   0 0.73597 3.60508   1
   0  27   0 -2.7751  3.1260   1
  -1 -27   0 3.98251 3.12007   3
   1  27   0 -5.5967  2.9261   1
  -1  27   0 -4.3036  3.0373   1
  -2 -27   0 4.04205 3.32091   3
  -2  27   0 1.93975 3.49253   1
   2  27   0 0.00405 3.57537   1
  -3 -27   0 2.90063 3.19652   3
   3  27   0 -10.686   2.701   1
  -4 -27   0 3.32289 2.99392   3
   4  27   0 1.23103 3.78398   1
   0  28   0 5.04219 3.93000   1
 -15   0   1 4.66841 3.21290   3
 -14   0   1 0.05062 2.43463   3
 -13   0   1 -0.8241  2.6068   3
 -12   0   1 -1.9007  2.4432   2
 -12   0   1 0.24029 2.51020   3
 -11   0   1 58.7204  6.1927   3
 -11   0   1 68.2631  5.5049   2
 -10   0   1 -0.6588  1.7115   3
 -10   0   1 -4.4913  1.4753   2
  -9   0   1 185.362  10.452   3
  -9   0   1 172.387  10.364   2
  -8   0   1 -1.4910  1.2257   2
  -8   0   1 -2.6264  1.3069   3
  -7   0   1 378.616  20.555   2
   7   0  -1 421.540  18.788   1
  -7   0   1 390.374  19.327   3
  -6   0   1 -1.0141  1.0542   3
  -6   0   1 -2.7511  0.8750   2
   6   0  -1 -0.6571  0.3868   1
   5   0  -1 1377.07   62.54   1
  -5   0   1 1338.91   66.71   2
   4   0  -1 -0.3663  0.2752   1
  -4   0   1 -0.6644  0.5102   2
  -3   0   1 93.9063  5.1014   2
  -2   0   1 -0.2848  0.3013   2
  -2   0  -1 -0.0829  0.3711   2
  -3   0  -1 75.8509  4.2410   2
  -4   0  -1 0.18952 0.56185   2
   4   0   1 0.49183 0.34919   1
  -5   0  -1 165.167   9.031   2
   5   0   1 170.333   8.159   1
  -6   0  -1 0.64688 0.96152   2
   6   0   1 0.11705 0.48626   1
  -7   0  -1 614.338  31.029   2
  -8   0  -1 -2.6820  1.6281   3
  -8   0  -1 -0.6525  1.2400   2
  -9   0  -1 261.289  14.121   3
  -9   0  -1 253.302  14.152   2
 -10   0  -1 -0.7376  1.6671   2
 -10   0  -1 -1.1543  1.8208   3
 -11   0  -1 60.8183  5.3646   2
 -11   0  -1 68.9644  6.6959   3
 -12   0  -1 -3.8137  2.2476   3
 -13   0  -1 2.11754 3.10395   3
 -14   0  -1 -2.3334  2.4758   3
 -15   0  -1 5.42483 3.59399   3
 -15  -1   1 24.2688  4.5656   3
 -15   1   1 18.6302  4.4136   3
 -14  -1   1 0.98329 2.93538   3
 -14   1   1 -2.2826  2.4609   3
 -13  -1   1 72.0935  6.5630   3
 -13   1   1 70.0826  7.2757   3
 -12  -1   1 0.88623 2.77800   3
 -12   1   1 2.56637 2.88637   3
 -12   1   1 -0.2572  2.4317   2
 -11  -1   1 92.3269  6.4931   2
 -11  -1   1 88.9069  6.8889   3
 -11   1   1 81.3805  6.7566   3
 -11   1   1 84.6940  6.6130   2
 -10  -1   1 -2.3024  1.5402   3
 -10  -1   1 -0.5276  1.6545   2
 -10   1   1 -0.3402  1.7765   3
 -10   1   1 -1.4194  1.6079   2
  -9  -1   1 173.646  10.717   2
  -9  -1   1 195.900  10.957   3
  -9   1   1 192.987  10.712   3
  -9   1   1 197.701  11.093   2
  -8  -1   1 12.5949  2.3282   2
  -8  -1   1 16.6426  2.6141   3
  -8   1   1 14.4901  2.3900   2
  -7  -1   1 3.52124 1.58307   3
   7   1  -1 2.54708 0.70023   1
  -6  -1   1 34.8231  2.9180   2
  -6  -1   1 36.7368  3.0711   3
   6   1  -1 40.7867  2.3163   1
  -6   1   1 37.0471  3.1091   2
  -5  -1   1 42.9860  3.2879   3
  -5  -1   1 53.4174  3.2857   2
  -5   1   1 54.2743  3.3777   2
   5   1  -1 41.5844  2.5901   1
  -4  -1   1 8.79493 1.30048   3
  -4  -1   1 9.38505 1.20047   2
   4   1  -1 9.75538 0.93383   1
  -4   1   1 10.0753  1.2986   2
  -3  -1   1 13.9741  1.3235   3
  -3  -1   1 16.1158  1.2750   2
  -3   1   1 16.2067  1.3705   2
   3   1  -1 14.9898  1.0255   1
  -2  -1   1 120.628   5.995   3
  -2  -1   1 121.835   6.432   2
  -2   1   1 119.388   6.517   2
   2   1  -1 141.515   6.067   1
  -1  -1  -1 2067.08   91.42   3
  -1   1  -1 2053.95  100.35   2
  -2  -1  -1 113.827   5.762   2
   2   1   1 109.770   5.462   1
  -2   1  -1 108.908   5.918   2
  -3  -1  -1 972.926  46.727   2
   3   1   1 931.479  44.107   1
  -3   1  -1 959.726  46.897   2
  -4  -1  -1 25.7085  1.8857   2
   4   1   1 25.1993  1.6364   1
  -4   1  -1 25.5379  2.0410   2
  -5  -1  -1 183.937   9.470   2
  -5  -1  -1 173.769   9.253   3
  -5   1  -1 185.693   9.652   2
   5   1   1 169.392   8.685   1
  -6  -1  -1 0.35169 0.89277   2
  -6  -1  -1 -3.3872  1.0156   3
  -6   1  -1 -0.2747  0.8065   2
   6   1   1 0.54282 0.58920   1
  -7  -1  -1 83.7904  5.2424   2
  -7  -1  -1 72.6704  5.6434   3
  -7   1  -1 86.2805  5.4609   2
  -8  -1  -1 4.89851 2.11388   3
  -8  -1  -1 7.84754 1.90020   2
  -8   1  -1 7.39008 1.87734   2
  -9  -1  -1 187.805  11.168   3
  -9  -1  -1 194.570  10.998   2
  -9   1  -1 190.568  11.039   2
 -10  -1  -1 -0.6928  1.9175   3
 -10  -1  -1 -2.0510  1.5134   2
 -10   1  -1 -0.8646  1.7045   2
 -10   1  -1 -1.4548  1.5747   3
 -11  -1  -1 64.3782  6.6883   3
 -11   1  -1 68.3295  6.3340   3
 -11   1  -1 66.4432  5.6657   2
 -12  -1  -1 -3.4878  2.4380   3
 -12   1  -1 1.00997 2.18027   2
 -12   1  -1 4.31944 2.78141   3
 -13  -1  -1 74.8652  7.6965   3
 -13   1  -1 78.1687  7.7779   3
 -14  -1  -1 0.79552 2.71967   3
 -14   1  -1 -1.4275  2.8330   3
 -15  -1  -1 23.0923  4.9342   3
 -15   1  -1 24.4804  5.1254   3
 -15  -2   1 3.48035 3.15920   3
 -15   2   1 -4.7396  2.8773   3
 -14  -2   1 0.40299 2.90556   3
 -14   2   1 -1.2418  2.6371   3
 -13  -2   1 2.25810 3.03741   3
 -13   2   1 0.69994 2.46807   2
 -13   2   1 -2.5965  2.5190   3
 -12  -2   1 -1.7570  2.3487   3
 -12   2   1 -1.4191  2.7680   3
 -12   2   1 1.57844 2.64821   2
 -11  -2   1 59.5631  5.6264   3
 -11  -2   1 60.7689  5.0375   2
 -11   2   1 57.8304  5.4949   3
 -11   2   1 61.9612  5.5277   2
 -10  -2   1 5.12546 2.03079   2
 -10  -2   1 5.60078 2.30750   3
 -10   2   1 3.01003 2.08787   3
 -10   2   1 3.17452 2.09110   2
  -9  -2   1 106.161   6.704   2
  -9  -2   1 98.9459  6.9438   3
  -9   2   1 102.223   6.964   2
  -8  -2   1 20.6234  2.5071   2
  -8  -2   1 25.0330  3.1879   3
  -8   2   1 19.0361  2.7414   2
  -7  -2   1 571.307  29.084   2
  -7  -2   1 600.546  27.347   3
   7   2  -1 565.187  27.105   1
  -7   2   1 572.349  29.320   2
  -6  -2   1 1.13358 1.16241   3
  -6  -2   1 1.94499 1.03635   2
   6   2  -1 -1.2675  0.5684   1
  -6   2   1 0.69396 1.07640   2
  -5  -2   1 881.031  41.019   3
  -5  -2   1 893.722  44.489   2
   5   2  -1 943.924  41.890   1
  -5   2   1 886.583  44.706   2
  -4  -2   1 120.228   6.559   3
  -4  -2   1 125.130   6.807   2
   4   2  -1 135.611   6.353   1
  -4   2   1 128.519   7.025   2
  -3  -2   1 1168.35   59.73   2
  -3  -2   1 1245.97   54.73   3
  -3   2   1 1202.95   59.96   2
   3   2  -1 1280.30   56.50   1
  -2  -2   1 304.632  15.743   2
  -2  -2   1 332.415  14.568   3
  -2   2   1 321.019  15.951   2
  -1  -2   1 185.450   9.181   3
  -1   2   1 201.150  10.127   2
   1   2  -1 217.801   9.579   1
   0  -2   1 4.59776 0.60861   3
   0   2   1 6.73994 0.69747   1
  -1  -2  -1 112.809   5.285   3
  -1   2  -1 106.193   5.802   2
   1   2   1 114.542   5.448   1
  -2  -2  -1 1353.17   61.75   3
  -2   2  -1 1415.86   67.74   2
   2   2   1 1386.48   63.89   1
  -3  -2  -1 20.1626  1.3990   2
  -3  -2  -1 19.8068  1.7086   3
   3   2   1 20.1754  1.4248   1
  -4  -2  -1 82.1252  4.7519   3
  -4  -2  -1 85.3588  4.5749   2
   4   2   1 77.7328  4.2963   1
  -4   2  -1 82.4932  4.8760   2
  -5  -2  -1 366.904  17.559   3
  -5  -2  -1 359.282  18.405   2
   5   2   1 363.832  17.371   1
  -5   2  -1 369.719  18.759   2
  -6  -2  -1 38.1582  3.2529   3
  -6  -2  -1 39.1986  2.7967   2
   6   2   1 32.8584  2.3836   1
  -6   2  -1 35.3248  2.9253   2
  -7  -2  -1 300.624  15.167   3
  -7  -2  -1 300.119  15.532   2
  -7   2  -1 292.624  15.791   2
   7   2   1 295.720  14.459   1
  -8  -2  -1 61.5156  4.8668   3
  -8  -2  -1 57.0298  4.2546   2
  -8   2  -1 55.7030  4.4581   2
  -9  -2  -1 163.995   9.871   3
  -9  -2  -1 157.538   9.345   2
  -9   2  -1 157.381   9.598   2
 -10  -2  -1 17.6469  2.8624   2
 -10  -2  -1 15.2305  3.2543   3
 -10   2  -1 15.8295  2.9504   2
 -11  -2  -1 44.6690  5.5399   3
 -11   2  -1 52.1448  5.7331   3
 -11   2  -1 50.8047  5.0161   2
 -12  -2  -1 2.82343 2.86654   3
 -12   2  -1 4.48267 2.58399   2
 -12   2  -1 -1.8974  2.2967   3
 -13  -2  -1 -2.5616  2.5922   3
 -13   2  -1 -0.9225  2.6089   3
 -14  -2  -1 -1.0667  3.0277   3
 -14   2  -1 2.87204 3.11227   3
 -15  -2  -1 3.75564 3.39029   3
 -15   2  -1 1.47849 3.45759   3
 -15  -3   1 13.2723  3.8978   3
 -15   3   1 12.5727  4.1343   3
 -14  -3   1 5.02900 3.20952   3
 -14   3   1 2.85084 2.86575   2
 -14   3   1 1.23376 3.09721   3
 -13  -3   1 59.0556  6.3068   3
 -13   3   1 57.6630  5.8064   2
 -13   3   1 50.8292  6.1279   3
 -12  -3   1 22.0558  4.1221   3
 -12   3   1 22.7379  3.9392   2
 -12   3   1 23.1872  4.1471   3
 -11  -3   1 57.0006  5.5370   3
 -11   3   1 40.3306  4.8478   3
 -11   3   1 37.5964  4.7243   2
 -10  -3   1 7.71604 2.46624   3
 -10  -3   1 2.13104 1.69350   2
 -10   3   1 -0.0817  1.9780   2
  -9  -3   1 101.488   6.469   2
  -9  -3   1 99.8653  6.8500   3
  -9   3   1 101.551   6.993   2
  -8  -3   1 2.86963 1.63023   3
  -8  -3   1 -0.0409  1.2320   2
  -8   3   1 0.67277 1.67477   2
  -7  -3   1 40.1473  3.2406   2
  -7  -3   1 36.0273  3.7774   3
  -7   3   1 40.6720  3.4937   2
   7   3  -1 41.9040  2.8292   1
  -6  -3   1 -0.6505  0.9127   2
  -6  -3   1 0.39729 1.14589   3
   6   3  -1 -1.8683  0.6714   1
  -6   3   1 -0.1732  1.1023   2
  -5  -3   1 2.53755 1.15868   3
  -5  -3   1 2.01130 0.83072   2
   5   3  -1 1.27806 0.74930   1
  -4  -3   1 0.26058 0.47157   2
  -4  -3   1 0.04458 0.58591   3
   4   3  -1 -0.2136  0.4850   1
  -3  -3   1 241.885  12.031   2
  -3  -3   1 231.400  11.290   3
  -3   3   1 246.033  12.363   2
  -2  -3   1 208.162   9.861   3
  -2  -3   1 200.436  10.570   2
  -2   3   1 215.585  10.834   2
   2   3  -1 222.455  10.176   1
  -1  -3   1 1183.59   53.97   3
  -1   3   1 1243.43   59.29   2
  -1   3   1 1128.71   56.00   1
   1   3  -1 1309.15   56.09   1
   0  -3  -1 848.754  40.838   3
   0  -3   1 891.206  40.959   3
   0   3   1 1032.27   42.59   1
   0   3  -1 910.710  42.487   1
  -1  -3  -1 654.158  28.867   3
  -1   3  -1 661.217  29.815   1
   1   3   1 642.256  29.986   1
  -1   3  -1 618.256  31.751   2
  -2  -3  -1 12.6592  1.1756   3
  -2   3  -1 13.9886  1.3034   2
   2   3   1 11.3781  1.0309   1
  -3  -3  -1 274.194  13.405   3
  -3  -3  -1 293.238  14.089   2
  -3   3  -1 279.766  14.580   2
   3   3   1 287.150  13.606   1
  -4  -3  -1 65.5815  3.9791   3
  -4  -3  -1 65.4737  3.6083   2
   4   3   1 62.2076  3.5794   1
  -4   3  -1 61.5426  4.0365   2
  -5   3  -1 18.6196  2.1477   2
   5   3   1 18.8664  1.6733   1
  -6  -3  -1 1.81535 1.27205   3
  -6  -3  -1 1.83400 0.98237   2
   6   3   1 1.43279 0.81471   1
  -6   3  -1 0.27374 1.06864   2
  -7  -3  -1 17.2732  2.1513   2
  -7  -3  -1 13.0463  2.6539   3
  -7   3  -1 18.0792  2.4527   2
   7   3   1 15.5696  1.8704   1
  -8  -3  -1 0.32178 1.30375   2
  -8  -3  -1 -1.5320  1.5632   3
  -8   3  -1 1.67010 1.76375   2
  -9  -3  -1 38.3531  3.4584   2
  -9  -3  -1 33.1648  4.3248   3
  -9   3  -1 36.0146  4.0267   2
 -10  -3  -1 20.3319  3.6059   3
 -10   3  -1 17.2889  3.0644   2
 -11  -3  -1 86.1473  7.0277   3
 -11   3  -1 90.6755  6.9430   2
 -12  -3  -1 6.27268 2.90915   3
 -12   3  -1 9.84459 3.33957   3
 -12   3  -1 5.51963 2.71704   2
 -13  -3  -1 46.9021  6.2253   3
 -13   3  -1 58.7810  5.8052   2
 -13   3  -1 57.5370  6.6272   3
 -14  -3  -1 7.46427 3.79514   3
 -14   3  -1 11.4984  3.6276   3
 -15  -3  -1 7.35950 3.64849   3
 -15   3  -1 16.4198  4.3769   3
 -15  -4   1 3.91017 3.38775   3
 -15   4   1 -3.8544  2.4424   3
 -14  -4   1 -1.5221  2.8501   3
 -14   4   1 0.22710 2.67748   3
 -14   4   1 3.68169 2.90425   2
 -13  -4   1 0.29639 2.66809   3
 -13   4   1 -0.3255  2.7675   2
 -13   4   1 1.68463 2.91454   3
 -12  -4   1 -2.1121  2.2859   3
 -12   4   1 0.98328 2.37769   3
 -12   4   1 -0.0329  2.5177   2
 -11  -4   1 38.0879  4.6539   3
 -11   4   1 29.1567  4.2380   2
 -10  -4   1 40.8798  4.5579   3
 -10   4   1 34.5122  4.2244   2
  -9  -4   1 69.7379  5.4558   3
  -9  -4   1 74.6795  5.0137   2
  -9   4   1 72.2580  5.5481   2
  -8  -4   1 106.657   6.629   3
  -8  -4   1 95.7753  6.0272   2
   8   4  -1 103.554   5.708   1
  -8   4   1 94.4555  6.5894   2
  -7  -4   1 672.012  29.916   3
  -7  -4   1 624.041  31.747   2
  -7   4   1 607.185  32.266   2
   7   4  -1 640.893  30.071   1
  -6  -4   1 511.603  24.981   2
  -6  -4   1 487.827  23.441   3
  -6   4   1 481.038  25.441   2
   6   4  -1 508.852  23.691   1
  -5  -4   1 525.577  24.644   3
  -5  -4   1 523.351  26.360   2
   5   4  -1 548.703  25.101   1
  -5   4   1 525.000  26.876   2
  -4  -4   1 95.3895  5.1005   2
  -4  -4   1 92.2134  5.1188   3
  -4   4   1 97.3503  5.5796   2
   4   4  -1 93.4644  5.0089   1
  -3  -4   1 25.8250  1.9172   3
  -3  -4   1 27.4786  1.7338   2
   3   4  -1 26.4880  1.8666   1
  -3   4   1 30.5745  2.1552   2
  -3   4   1 27.6220  1.6486   1
  -2  -4   1 191.169   9.154   3
  -2  -4   1 194.921   9.803   2
  -2   4   1 189.668   9.299   1
   2   4  -1 198.131   9.470   1
  -2   4   1 201.985  10.085   2
  -1  -4   1 10.1293  0.8654   3
   1  -4  -1 9.97483 0.88101   3
   1   4  -1 7.81513 0.92081   1
  -1   4   1 7.28316 0.93546   2
  -1   4   1 10.7409  0.8827   1
   0  -4  -1 24.3120  1.4443   3
   0  -4   1 23.9151  1.5566   3
   0   4  -1 26.7791  1.5936   1
   0   4   1 27.4406  1.6599   1
   0   4   1 25.1535  1.5630   2
  -1  -4  -1 123.857   5.783   3
  -1   4  -1 110.697   6.404   2
  -1   4  -1 125.175   5.878   1
   1   4   1 120.996   6.058   1
  -2  -4  -1 1177.87   54.29   3
  -2   4  -1 1191.14   59.67   2
  -2   4  -1 1289.87   56.01   1
   2   4   1 1203.28   56.31   1
  -3  -4  -1 230.686  11.028   3
  -3   4  -1 228.425  12.032   2
  -4  -4  -1 156.491   7.818   2
  -4  -4  -1 145.730   7.802   3
  -4   4  -1 144.955   8.388   2
   4   4   1 157.621   7.762   1
  -5  -4  -1 977.466  46.407   2
  -5  -4  -1 936.536  43.113   3
   5   4   1 933.422  44.124   1
  -5   4  -1 929.323  46.982   2
  -6  -4  -1 301.332  14.839   3
  -6  -4  -1 305.319  15.187   2
  -6   4  -1 280.820  15.707   2
   6   4   1 296.660  14.562   1
  -7  -4  -1 346.243  17.353   3
  -7  -4  -1 336.263  17.783   2
   7   4   1 344.883  17.005   1
  -7   4  -1 361.795  18.481   2
  -8  -4  -1 179.267  10.287   3
  -8  -4  -1 182.648   9.921   2
  -8   4  -1 174.472  10.428   2
  -9  -4  -1 35.7263  4.2502   3
  -9   4  -1 30.4487  3.7285   2
 -10  -4  -1 57.5666  5.8014   3
 -10   4  -1 54.4333  5.0904   2
 -11  -4  -1 21.6524  4.0228   3
 -11   4  -1 28.9784  4.0432   2
 -12  -4  -1 3.70284 2.89832   3
 -12   4  -1 4.02744 2.58264   2
 -13  -4  -1 -1.2629  2.6374   3
 -13   4  -1 -0.7582  2.6826   2
 -13   4  -1 3.80836 2.89008   3
 -14  -4  -1 -1.6791  2.8654   3
 -14   4  -1 0.81841 2.80875   3
 -15  -5   1 9.42302 3.73583   3
 -15   5   1 7.30299 3.67498   2
 -15   5   1 7.82175 3.64997   3
 -14  -5   1 11.9666  3.8124   3
 -14   5   1 11.8238  3.5789   3
 -14   5   1 12.6106  3.7191   2
 -13  -5   1 49.4259  5.9143   3
 -13   5   1 49.9460  5.9190   3
 -13   5   1 47.5206  5.6858   2
 -12  -5   1 27.6242  4.3812   3
 -12   5   1 21.7343  4.1093   2
 -11  -5   1 17.5029  3.6503   3
 -11   5   1 20.5121  3.8349   2
 -10  -5   1 7.19090 2.42896   3
 -10   5   1 7.55834 2.56995   2
  -9  -5   1 40.0079  4.2397   3
  -9   5   1 33.9207  4.0177   2
  -8  -5   1 17.6856  2.2440   2
  -8  -5   1 17.9506  2.8135   3
   8   5  -1 19.4808  2.3011   1
  -8   5   1 16.9831  2.7732   2
  -7  -5   1 11.2911  2.2583   3
  -7  -5   1 10.2840  1.7002   2
   7   5  -1 11.5099  1.7468   1
  -7   5   1 10.3103  2.2227   2
  -6  -5   1 -0.6325  0.7368   2
  -6  -5   1 1.01536 1.13433   3
   6   5  -1 -0.5574  0.8314   1
  -6   5   1 -0.9284  1.2044   2
  -5  -5   1 27.9801  2.0824   2
  -5  -5   1 31.4969  2.5366   3
   5   5  -1 24.5666  2.2115   1
  -5   5   1 31.7282  2.7835   2
  -4  -5   1 19.1384  1.5269   2
  -4  -5   1 24.1324  1.9597   3
  -4   5   1 22.7491  1.3891   1
  -4   5   1 23.5335  2.1082   2
   4   5  -1 16.5324  1.8051   1
  -3  -5   1 207.648  10.673   2
  -3  -5   1 204.166  10.127   3
  -3   5   1 213.268  10.134   1
  -3   5   1 216.860  11.148   2
   3   5  -1 219.478  10.446   1
  -2  -5   1 103.047   5.396   2
  -2  -5   1 101.459   5.150   3
   2   5  -1 108.518   5.361   1
  -2   5   1 97.2802  5.1455   1
  -2   5   1 103.915   5.683   2
   1  -5  -1 1674.95   73.97   3
  -1  -5   1 1632.12   73.96   3
  -1   5   1 1672.66   76.79   1
   1   5  -1 1681.00   76.85   1
   0  -5   1 323.244  15.052   3
   0  -5  -1 310.116  14.913   3
   0   5   1 339.264  15.655   1
   0   5  -1 324.826  15.556   1
   0   5   1 346.899  16.299   2
  -1  -5  -1 47.2911  2.6151   3
  -1   5  -1 48.8560  2.6376   1
   1   5   1 47.6992  2.8178   1
  -1   5  -1 45.6178  3.0013   2
  -2  -5  -1 224.950  10.377   3
  -2   5  -1 218.588  11.464   2
   2   5   1 210.549  10.704   1
  -2   5  -1 221.292  10.404   1
  -3  -5  -1 390.327  18.796   3
   3   5   1 411.685  19.398   1
  -3   5  -1 405.811  20.678   2
  -3   5  -1 414.373  18.915   1
  -4  -5  -1 73.8837  3.8008   2
  -4  -5  -1 64.1639  4.1817   3
  -4   5  -1 70.9929  4.6196   2
  -5  -5  -1 64.0780  4.2712   3
  -5  -5  -1 66.3349  3.7624   2
  -5   5  -1 65.4953  4.4947   2
   5   5   1 65.3973  4.0215   1
  -6  -5  -1 16.8613  2.4191   3
  -6  -5  -1 16.1358  1.7606   2
   6   5   1 18.1199  2.0658   1
  -6   5  -1 19.6922  2.5837   2
  -7  -5  -1 29.4743  3.5012   3
  -7  -5  -1 30.0638  2.5798   2
  -7   5  -1 26.4656  3.1944   2
   7   5   1 30.4794  2.7018   1
  -8  -5  -1 25.1048  3.4454   3
  -8   5  -1 21.8464  3.0871   2
  -9  -5  -1 2.59286 2.05027   3
  -9   5  -1 1.70326 1.87105   2
 -10  -5  -1 32.1100  4.4190   3
 -10   5  -1 29.1778  4.0874   2
 -11  -5  -1 88.8876  7.0800   3
 -11   5  -1 78.9893  6.5464   2
 -12  -5  -1 50.3574  5.8363   3
 -12   5  -1 39.3713  5.2360   2
 -13  -5  -1 26.6776  4.7932   3
 -13   5  -1 27.1546  4.5084   3
 -13   5  -1 27.6157  4.5824   2
 -14  -5  -1 16.5385  4.4587   3
 -14   5  -1 19.1145  4.4974   3
 -14   5  -1 20.8895  4.3289   2
 -15  -6   1 0.65301 3.16811   3
 -15   6   1 3.27133 3.21141   2
 -15   6   1 -1.6099  2.6700   3
 -14  -6   1 -0.9929  2.3884   3
 -14   6   1 0.40564 2.87512   3
 -14   6   1 -2.6318  2.7055   2
 -13  -6   1 2.41645 3.01050   3
 -13   6   1 3.12238 2.98925   2
 -12  -6   1 -0.1986  2.3735   3
 -12   6   1 0.41389 2.71125   2
 -11  -6   1 11.9256  3.2154   3
 -11   6   1 14.5177  3.3719   2
 -10  -6   1 34.4234  4.1400   3
 -10   6   1 40.5369  4.6121   2
  -9  -6   1 50.9600  4.3777   3
  -9   6   1 42.4288  4.2645   2
  -8  -6   1 222.342  11.690   2
  -8  -6   1 226.250  11.767   3
  -8   6   1 207.674  12.450   2
   8   6  -1 217.762  11.385   1
  -7  -6   1 208.173  10.972   2
  -7  -6   1 202.655  10.922   3
   7   6  -1 220.177  10.821   1
  -7   6   1 198.885  11.743   2
  -6  -6   1 293.581  14.506   3
  -6  -6   1 289.079  14.972   2
  -6   6   1 287.424  15.743   2
   6   6  -1 307.441  14.632   1
  -5  -6   1 528.977  25.047   3
  -5  -6   1 538.381  26.703   2
  -5   6   1 541.868  25.070   1
  -5   6   1 547.606  27.453   2
  -4  -6   1 207.519  10.435   3
  -4  -6   1 206.557  10.803   2
  -4   6   1 217.607  11.471   2
   4   6  -1 222.908  10.732   1
  -4   6   1 212.274  10.225   1
  -3  -6   1 67.5388  3.9671   3
  -3  -6   1 73.1507  3.9544   2
   3   6  -1 72.7990  4.1075   1
  -3   6   1 71.9135  4.4542   2
  -3   6   1 73.0933  3.8289   1
  -2  -6   1 7.18344 0.98422   3
   2   6  -1 7.66014 1.09171   1
  -2   6   1 8.80661 1.00582   1
  -2   6   1 8.53461 1.19682   2
  -1  -6   1 421.598  20.193   3
   1  -6  -1 443.170  20.232   3
  -1   6   1 473.800  21.025   1
   1   6  -1 440.822  21.033   1
   0  -6   1 0.92313 0.51562   3
   0  -6  -1 0.92352 0.46862   3
   0   6   1 1.57864 0.52585   2
   0   6   1 1.25140 0.63071   1
   0   6  -1 0.97325 0.54640   1
   0   6  -1 0.83308 0.46250   2
  -1  -6  -1 49.1162  2.7597   3
  -1   6  -1 50.1317  2.8006   1
   1   6   1 47.5087  2.9338   1
  -1   6  -1 49.1981  3.1552   2
  -2  -6  -1 22.8276  1.7217   3
   2   6   1 21.6385  1.8027   1
  -2   6  -1 21.8904  2.0040   2
  -2   6  -1 24.0632  1.5548   1
  -3  -6  -1 31.2834  2.3029   3
  -3   6  -1 33.3125  1.9211   1
   3   6   1 30.5260  2.3122   1
  -3   6  -1 30.0872  2.5724   2
  -4  -6  -1 201.146  10.220   3
   4   6   1 206.877  10.414   1
  -4   6  -1 206.672   9.755   1
  -4   6  -1 205.869  11.205   2
  -5  -6  -1 572.946  26.715   3
  -5  -6  -1 608.534  28.229   2
   5   6   1 500.751  27.220   1
  -5   6  -1 610.033  29.283   2
  -6  -6  -1 530.838  24.792   3
  -6  -6  -1 529.554  25.930   2
  -6   6  -1 511.058  26.882   2
   6   6   1 517.166  25.119   1
  -7  -6  -1 165.686   9.520   3
  -7  -6  -1 175.232   9.182   2
  -7   6  -1 165.625  10.061   2
   7   6   1 178.972   9.299   1
  -8  -6  -1 181.491   9.983   3
  -8   6  -1 162.450  10.261   2
   8   6   1 171.963   9.364   1
  -9  -6  -1 20.2106  3.2368   3
  -9   6  -1 17.0349  3.1135   2
 -10  -6  -1 14.7019  3.2157   3
 -10   6  -1 16.2671  3.4443   2
 -11  -6  -1 22.3400  4.0331   3
 -11   6  -1 17.4024  3.6799   2
 -12  -6  -1 12.9723  3.8558   3
 -12   6  -1 16.2458  3.7434   2
 -13  -6  -1 0.40792 2.58565   3
 -13   6  -1 3.17315 3.04195   2
 -14  -6  -1 3.07271 3.32946   3
 -14   6  -1 0.93333 2.75329   3
 -14   6  -1 3.97201 3.23631   2
 -14  -7   1 26.3953  4.6925   3
 -14   7   1 31.9097  4.9101   3
 -14   7   1 20.9808  4.5769   2
 -13  -7   1 20.1888  4.1061   3
 -13   7   1 13.4515  3.8166   2
 -12  -7   1 44.8161  5.2851   3
 -12   7   1 45.3647  5.6735   2
 -11  -7   1 36.9448  4.5626   3
 -11   7   1 32.0621  4.5991   2
 -10  -7   1 30.1358  3.8772   3
 -10   7   1 24.3806  3.8725   2
  -9  -7   1 15.6537  2.8083   3
  -9   7   1 12.1979  2.8046   2
  -8  -7   1 16.3221  2.6640   3
   8   7  -1 17.3651  2.3702   1
  -8   7   1 14.3310  2.7585   2
  -7  -7   1 -1.3854  1.1119   3
  -7  -7   1 0.05412 0.90921   2
  -7   7   1 -0.7125  1.6017   2
   7   7  -1 -1.0008  1.0754   1
  -6  -7   1 30.0175  2.2507   2
  -6  -7   1 34.4115  2.9146   3
  -6   7   1 32.1794  3.1737   2
  -5  -7   1 71.4211  4.4310   3
  -5  -7   1 72.3300  4.0501   2
   5   7  -1 68.5893  4.4081   1
  -5   7   1 72.4572  3.7919   1
  -5   7   1 68.4538  4.8609   2
  -4  -7   1 570.022  28.258   2
  -4  -7   1 564.567  26.376   3
  -4   7   1 573.689  26.806   1
   4   7  -1 582.580  27.274   1
  -4   7   1 573.628  28.953   2
  -3  -7   1 84.7462  4.5944   2
  -3  -7   1 88.3846  4.6741   3
   3   7  -1 84.2324  4.7921   1
  -3   7   1 83.4447  5.1107   2
  -3   7   1 81.3106  4.4779   1
  -2  -7   1 550.759  25.512   3
  -2   7   1 558.970  26.355   1
  -2   7   1 569.739  28.042   2
   2   7  -1 563.900  26.539   1
   1  -7  -1 94.0344  4.7367   3
  -1  -7   1 88.3928  4.7093   3
   1   7  -1 90.0223  4.9107   1
  -1   7   1 91.5104  4.8884   1
   0  -7  -1 248.788  11.798   3
   0  -7   1 259.076  11.957   3
   0   7   1 259.230  12.415   1
   0   7  -1 250.837  12.315   1
   0   7   1 272.232  12.834   2
   0   7  -1 231.408  12.958   2
  -1  -7  -1 308.708  14.605   3
  -1   7  -1 330.358  15.146   1
   1   7   1 322.116  15.650   2
  -1   7  -1 307.115  16.167   2
   1   7   1 310.118  15.305   1
  -2  -7  -1 459.206  21.026   3
   2   7   1 461.371  21.915   1
  -2   7  -1 438.150  23.183   2
  -2   7  -1 472.269  21.579   1
  -3  -7  -1 41.6575  2.7586   3
   3   7   1 41.7669  2.8538   1
  -3   7  -1 35.2572  3.0557   2
  -3   7  -1 40.4591  2.4052   1
  -4  -7  -1 12.4533  1.7864   3
  -4   7  -1 15.1156  2.1367   2
  -4   7  -1 15.7972  1.2361   1
   4   7   1 15.3566  1.9120   1
  -5  -7  -1 0.60848 1.08236   3
  -5  -7  -1 0.33535 0.48984   2
   5   7   1 0.39680 0.82769   1
  -5   7  -1 -0.2029  0.4868   1
  -5   7  -1 -0.1756  1.1301   2
  -6  -7  -1 34.2461  2.2102   2
  -6  -7  -1 28.7863  3.1061   3
   6   7   1 32.2066  2.8653   1
  -6   7  -1 33.8525  3.3143   2
  -7  -7  -1 24.3265  3.0414   3
   7   7   1 23.1640  2.7320   1
  -7   7  -1 23.2383  3.1508   2
  -8  -7  -1 9.65360 2.30909   3
  -8   7  -1 9.05344 2.32766   2
   8   7   1 10.5120  2.0393   1
  -9  -7  -1 1.68927 2.00820   3
  -9   7  -1 0.76639 1.83458   2
 -10  -7  -1 53.8147  5.4660   3
 -10   7  -1 44.8308  5.2083   2
 -11  -7  -1 25.5481  4.1772   3
 -11   7  -1 23.3593  4.0137   2
 -12  -7  -1 72.4367  6.5956   3
 -12   7  -1 74.3339  6.8886   2
 -13  -7  -1 1.39532 2.66893   3
 -13   7  -1 5.18427 3.08317   2
 -14  -7  -1 20.6046  4.3686   3
 -14   7  -1 23.0440  4.6294   2
 -14  -8   1 0.64181 2.77275   3
 -14   8   1 -1.5208  2.7504   2
 -13  -8   1 1.33321 2.68541   3
 -13   8   1 0.97590 2.87774   2
 -12  -8   1 -1.3757  2.2707   3
 -12   8   1 1.68550 2.78023   2
 -11  -8   1 5.11409 2.75662   3
 -11   8   1 5.76534 3.05587   2
 -10  -8   1 40.0735  4.5052   3
 -10   8   1 38.4826  4.6358   2
  -9  -8   1 26.4796  3.3974   3
  -9   8   1 18.8867  3.3426   2
  -8  -8   1 231.413  12.382   3
   8   8  -1 232.595  12.373   1
  -8   8   1 239.413  13.562   2
  -7  -8   1 102.516   6.248   3
   7   8  -1 105.724   6.122   1
  -7   8   1 93.8738  6.6648   2
  -6  -8   1 224.309  11.329   2
  -6  -8   1 227.959  11.317   3
  -6   8   1 215.060  12.288   2
   6   8  -1 210.979  11.388   1
  -5  -8   1 15.5159  2.0437   3
  -5  -8   1 14.4543  1.3206   2
  -5   8   1 12.5198  1.3356   1
  -5   8   1 14.4094  2.2088   2
   5   8  -1 13.6546  1.9560   1
  -4  -8   1 613.453  29.683   2
  -4  -8   1 573.397  27.645   3
   4   8  -1 602.926  28.669   1
  -4   8   1 598.766  30.412   2
  -4   8   1 615.210  28.241   1
  -3  -8   1 116.819   6.300   3
   3   8  -1 123.185   6.584   1
  -3   8   1 119.337   6.940   2
  -3   8   1 121.491   6.258   1
  -2  -8   1 22.2929  1.8493   3
  -2   8   1 22.3506  1.8428   1
   2   8  -1 23.8089  2.0592   1
  -2   8   1 23.5732  2.0984   2
   1  -8  -1 229.655  10.590   3
  -1  -8   1 218.126  10.545   3
  -1   8   1 203.042  11.405   2
  -1   8   1 233.299  10.995   1
   1   8  -1 221.207  10.999   1
   0  -8   1 162.980   8.154   3
   0  -8  -1 166.217   8.036   3
   0   8  -1 162.772   8.390   1
   0   8  -1 168.407   8.869   2
   0   8   1 169.567   8.631   2
   0   8   1 163.713   8.473   1
  -1  -8  -1 9.24736 1.15814   3
   1   8   1 8.08129 1.24642   1
  -1   8  -1 6.42695 1.06640   1
   1   8   1 8.24677 0.92260   2
  -1   8  -1 7.84973 1.31699   2
  -2  -8  -1 194.928   9.555   3
  -2   8  -1 196.656   9.686   1
   2   8   1 198.232  10.029   1
  -2   8  -1 194.350  10.606   2
  -3  -8  -1 0.65241 0.79729   3
  -3   8  -1 0.26174 0.97365   2
   3   8   1 -1.1789  0.7741   1
  -3   8  -1 0.85091 0.68729   1
  -4  -8  -1 325.193  15.545   3
  -4   8  -1 325.630  15.413   1
  -4   8  -1 321.206  17.127   2
   4   8   1 323.857  16.075   1
  -5  -8  -1 128.579   7.119   3
  -5   8  -1 129.984   6.402   1
  -5   8  -1 127.650   7.806   2
   5   8   1 127.753   7.233   1
  -6  -8  -1 301.609  14.963   3
  -6   8  -1 299.228  16.333   2
  -7  -8  -1 38.7144  3.5695   3
  -7   8  -1 41.3717  4.0743   2
   7   8   1 39.1161  3.3918   1
  -8  -8  -1 135.985   8.066   3
  -8   8  -1 129.820   8.637   2
   8   8   1 129.874   7.773   1
  -9  -8  -1 28.8254  3.7997   3
  -9   8  -1 26.9326  3.9430   2
 -10  -8  -1 16.0378  3.2417   3
 -10   8  -1 12.6502  3.2401   2
 -11  -8  -1 6.71476 2.96782   3
 -11   8  -1 13.0339  3.3929   2
 -12  -8  -1 11.5826  3.3644   3
 -12   8  -1 12.9293  3.5230   2
 -13  -8  -1 -2.1626  2.7343   3
 -13   8  -1 -3.9746  2.7296   2
 -14  -8  -1 -0.5850  2.8594   3
 -14   8  -1 -1.1094  3.1732   2
 -14  -9   1 22.9389  4.4570   3
 -14   9   1 6.04786 3.69710   2
 -13  -9   1 1.51459 2.67407   3
 -13   9   1 -0.0682  2.9920   2
 -12  -9   1 37.2609  4.7517   3
 -12   9   1 34.9851  5.0680   2
 -11  -9   1 7.05907 2.66629   3
 -11   9   1 4.67136 2.95626   2
 -10  -9   1 43.6350  4.6882   3
 -10   9   1 37.6281  4.7807   2
  -9  -9   1 4.25934 1.98276   3
   9   9  -1 5.98055 1.89899   1
  -9   9   1 3.16088 2.43420   2
  -8  -9   1 4.51766 1.82231   3
   8   9  -1 8.43192 1.96941   1
  -8   9   1 4.65862 2.22334   2
  -7  -9   1 14.9983  2.4325   3
  -7   9   1 15.4120  2.7347   2
  -6  -9   1 0.92116 1.25653   3
  -6   9   1 -1.8503  1.2267   2
   6   9  -1 2.04951 1.22843   1
  -5  -9   1 8.24868 1.08493   2
  -5  -9   1 8.25508 1.57378   3
  -5   9   1 5.95737 1.15105   1
  -5   9   1 5.43118 1.75730   2
   5   9  -1 6.14079 1.57057   1
  -4  -9   1 351.234  16.604   3
   4   9  -1 343.784  17.167   1
  -4   9   1 347.376  16.724   1
  -4   9   1 348.889  18.225   2
  -3  -9   1 1.19978 0.88775   3
   3   9  -1 1.59467 1.05624   1
  -3   9   1 2.37479 1.14370   2
  -3   9   1 2.19450 0.88950   1
  -2  -9   1 744.705  34.728   3
  -2   9   1 800.834  38.162   2
   2   9  -1 770.719  36.174   1
  -2   9   1 747.634  35.937   1
   1  -9  -1 192.879   9.778   3
  -1  -9   1 203.192   9.821   3
   1   9  -1 202.359  10.257   1
  -1   9   1 204.414  10.198   1
   1   9  -1 196.194  10.550   2
  -1   9   1 210.307  10.648   2
   0  -9  -1 787.225  35.886   3
   0  -9   1 798.920  36.041   3
   0   9   1 792.087  37.426   1
   0   9   1 797.222  39.186   2
   0   9  -1 782.369  37.342   1
   0   9  -1 812.148  39.469   2
   1  -9   1 32.1859  2.5219   3
  -1  -9  -1 33.2723  2.3303   3
  -1   9  -1 35.4551  2.5337   1
   1   9   1 32.3141  2.6085   1
   1   9   1 33.5197  2.1642   2
  -1   9  -1 29.9297  2.6367   2
  -2  -9  -1 303.139  14.126   3
   2   9   1 299.687  14.735   2
  -2   9  -1 298.787  14.426   1
   2   9   1 293.375  14.782   1
  -2   9  -1 292.040  15.618   2
  -3  -9  -1 2.80275 1.03174   3
  -3   9  -1 4.12041 0.92794   1
   3   9   1 3.64840 1.20587   1
  -3   9  -1 2.13512 1.23604   2
  -4  -9  -1 125.284   6.792   3
  -4   9  -1 125.651   6.392   1
   4   9   1 121.909   7.048   1
  -4   9  -1 123.910   7.540   2
  -5  -9  -1 2.42160 1.27908   3
   5   9   1 2.78455 1.31441   1
  -5   9  -1 -0.6310  1.2530   2
  -5   9  -1 -0.1130  0.7791   1
  -6  -9  -1 2.79661 1.46575   3
  -6   9  -1 6.11382 2.00171   2
   6   9   1 8.19227 1.77438   1
  -7  -9  -1 7.03722 1.88235   3
   7   9   1 3.35163 1.07114   1
  -7   9  -1 5.75358 2.19287   2
  -8  -9  -1 27.4118  3.4828   3
  -8   9  -1 25.5815  3.7103   2
   8   9   1 31.7561  3.5399   1
  -9  -9  -1 -0.3689  1.8238   3
  -9   9  -1 -3.0653  2.0191   2
 -10  -9  -1 57.6008  5.1554   3
 -10   9  -1 42.5571  5.1845   2
 -11  -9  -1 4.23858 2.56991   3
 -11   9  -1 1.04313 2.71363   2
 -12  -9  -1 43.0298  5.5162   3
 -12   9  -1 48.8218  5.7280   2
 -13  -9  -1 -2.7385  2.4168   3
 -13   9  -1 -1.1574  2.9513   2
 -14  -9  -1 19.1518  4.5723   3
 -14   9  -1 19.3290  4.6105   2
 -14 -10   1 -1.4646  2.7203   3
 -14  10   1 0.36701 3.05046   2
 -13 -10   1 -3.5975  2.2122   3
 -13  10   1 -0.2024  3.0285   2
 -12 -10   1 1.10147 2.57237   3
 -12  10   1 4.63740 3.03462   2
 -11 -10   1 -2.0843  1.9197   3
 -11  10   1 0.86729 2.63556   2
 -10 -10   1 69.4983  5.5454   3
 -10  10   1 58.6586  5.6797   2
  -9 -10   1 3.46110 2.02012   3
   9  10  -1 3.51784 1.92216   1
  -9  10   1 0.21052 2.22054   2
  -8 -10   1 135.750   8.088   3
  -8  10   1 133.029   8.791   2
  -7 -10   1 2.41920 1.51217   3
   7  10  -1 3.01541 1.52407   1
  -7  10   1 1.44488 1.76523   2
  -6 -10   1 248.355  13.046   3
  -6  10   1 273.251  14.486   2
   6  10  -1 256.819  13.467   1
  -5 -10   1 6.71823 1.57324   3
  -5  10   1 3.21848 1.60778   2
   5  10  -1 6.31600 1.62414   1
  -5  10   1 4.55614 1.11411   1
  -4 -10   1 294.037  14.563   3
   4  10  -1 292.097  15.091   1
  -4  10   1 304.985  14.684   1
  -4  10   1 310.167  16.061   2
  -3 -10   1 -1.5847  0.7230   3
   3  10  -1 -1.0205  0.9061   1
  -3  10   1 -1.1647  0.7139   1
  -3  10   1 -1.3333  0.8255   2
  -2 -10   1 102.917   5.669   3
  -2  10   1 107.244   5.822   1
   2  10  -1 101.339   5.937   1
  -2  10   1 104.051   6.175   2
  -1 -10   1 36.8329  2.6016   3
   1 -10  -1 35.0144  2.6400   3
  -1  10   1 31.3637  2.6789   1
   1  10  -1 32.0963  2.7307   1
   1  10  -1 36.4869  2.6811   2
  -1  10   1 32.6233  2.7173   2
   0 -10  -1 328.828  15.162   3
   0 -10   1 315.738  15.246   3
   0  10  -1 314.804  15.762   1
   0  10   1 323.078  15.871   1
   0  10   1 325.323  16.345   2
   0  10  -1 320.265  16.595   2
  -1 -10  -1 3.95888 1.11230   3
   1 -10   1 3.12290 1.17454   3
   1  10   1 2.43441 1.16070   1
  -1  10  -1 3.47981 1.17949   2
  -1  10  -1 3.69583 1.18888   1
   1  10   1 4.70600 0.96580   2
  -2 -10  -1 371.698  17.067   3
  -2  10  -1 358.563  17.481   1
   2  10   1 352.907  17.898   2
   2  10   1 361.733  17.852   1
  -2  10  -1 365.711  18.851   2
  -3 -10  -1 1.56572 0.95328   3
  -3  10  -1 -1.9213  0.9507   2
  -3  10  -1 -0.4939  0.7965   1
   3  10   1 0.40833 1.01270   1
  -4 -10  -1 353.384  17.194   3
   4  10   1 356.938  17.930   1
  -4  10  -1 360.284  19.041   2
  -4  10  -1 365.363  17.264   1
  -5 -10  -1 1.14124 1.26354   3
  -5  10  -1 4.53394 1.04411   1
   5  10   1 4.30768 1.46992   1
  -5  10  -1 5.06943 1.84154   2
  -6 -10  -1 279.652  14.443   3
   6  10   1 303.522  15.007   1
  -6  10  -1 282.130  15.917   2
  -7 -10  -1 -1.3258  1.3389   3
  -7  10  -1 -1.6414  1.7577   2
   7  10   1 -0.4362  1.1795   1
  -8 -10  -1 255.127  13.262   3
  -8  10  -1 248.153  14.443   2
   8  10   1 238.617  13.328   1
  -9 -10  -1 10.1082  2.6070   3
   9  10   1 17.6053  3.1756   1
  -9  10  -1 14.9877  3.3589   2
 -10 -10  -1 26.1949  3.9398   3
 -10  10  -1 25.3539  4.2235   2
 -11 -10  -1 7.17776 2.76014   3
 -11  10  -1 4.77428 2.95370   2
 -12 -10  -1 10.6025  3.2732   3
 -12  10  -1 7.94977 3.31622   2
 -13 -10  -1 -2.3514  2.4076   3
 -13  10  -1 -4.6604  2.4946   2
 -14 -10  -1 -1.1318  2.7341   3
 -14  10  -1 -0.1539  3.2707   2
 -14 -11   1 13.3135  3.7225   3
 -14  11   1 11.4805  4.1805   2
 -13 -11   1 -1.0543  2.7532   3
 -13  11   1 0.68320 2.95337   2
 -12 -11   1 28.5018  4.4028   3
 -12  11   1 36.8510  5.2242   2
 -11 -11   1 -2.0148  1.9732   3
 -11  11   1 4.95076 3.13710   2
 -10 -11   1 41.6302  4.6965   3
 -10  11   1 45.6331  5.2093   2
  -9 -11   1 2.56584 2.00448   3
   9  11  -1 -0.0202  1.7095   1
  -9  11   1 -0.7871  2.2625   2
  -8 -11   1 4.55610 1.93548   3
  -8  11   1 4.61097 2.26393   2
   8  11  -1 5.79932 1.87503   1
  -7 -11   1 18.4624  2.6281   3
  -7  11   1 10.1379  2.4985   2
   7  11  -1 14.3939  2.5487   1
  -6 -11   1 0.23474 1.19336   3
  -6  11   1 0.57444 1.60016   2
   6  11  -1 -0.3766  1.1105   1
  -5 -11   1 -0.7559  1.0183   3
  -5  11   1 -2.2072  0.9153   1
  -5  11   1 -3.1215  1.1709   2
   5  11  -1 0.41125 1.18536   1
  -4 -11   1 139.497   7.706   3
   4  11  -1 140.794   8.027   1
  -4  11   1 143.963   8.487   2
  -4  11   1 147.907   7.635   1
  -3 -11   1 16.6316  2.0443   3
   3  11  -1 16.6106  2.2058   1
  -3  11   1 16.1609  2.2930   2
  -3  11   1 17.8751  2.0390   1
  -2 -11   1 488.563  23.123   3
  -2  11   1 506.315  23.956   1
   2  11  -1 502.295  24.966   2
   2  11  -1 496.001  24.146   1
   1 -11  -1 -0.7322  0.9236   3
  -1 -11   1 0.63365 0.96699   3
  -1  11   1 -0.6068  1.0163   2
  -1  11   1 1.69423 1.15515   1
   1  11  -1 2.00962 1.17772   1
   1  11  -1 2.15156 1.11612   2
   0 -11   1 1236.95   54.48   3
   0 -11  -1 1189.42   54.31   3
   0  11  -1 1210.77   56.46   1
   0  11   1 1183.24   56.54   1
   0  11   1 1183.42   59.30   2
   0  11  -1 1240.49   59.60   2
   1 -11   1 -2.2718  0.9096   3
  -1 -11  -1 1.39101 0.89409   3
  -1  11  -1 0.41271 0.59514   2
   1  11   1 -0.5934  0.8468   1
  -1  11  -1 0.92102 0.99788   1
   1  11   1 0.73952 0.75788   2
  -2 -11  -1 346.792  16.592   3
   2  11   1 350.708  17.419   2
  -2  11  -1 339.610  17.034   1
   2  11   1 350.024  17.444   1
  -2  11  -1 363.535  18.410   2
  -3 -11  -1 2.37850 1.17242   3
  -3  11  -1 -0.1608  1.4679   2
   3  11   1 0.43179 1.26262   1
  -3  11  -1 -0.2447  1.0751   1
  -4 -11  -1 159.772   8.454   3
  -4  11  -1 157.673   9.378   2
   4  11   1 154.620   8.816   1
  -4  11  -1 158.631   8.176   1
  -5 -11  -1 1.60649 1.35289   3
  -5  11  -1 -0.7384  0.8835   1
  -5  11  -1 0.72929 1.58201   2
   5  11   1 -0.6385  1.1448   1
  -6 -11  -1 0.71384 1.36809   3
  -6  11  -1 5.42039 2.04435   2
   6  11   1 5.15552 1.78726   1
  -7 -11  -1 15.8270  2.6376   3
  -7  11  -1 14.8065  3.0135   2
   7  11   1 18.2603  2.7685   1
  -8 -11  -1 28.0457  3.5861   3
  -8  11  -1 31.1829  4.1018   2
  -9 -11  -1 -0.5089  1.9140   3
   9  11   1 -0.7036  1.8686   1
  -9  11  -1 -1.4514  2.2409   2
 -10 -11  -1 44.0242  4.9968   3
 -10  11  -1 42.4899  5.3342   2
 -11 -11  -1 0.49109 2.24507   3
 -11  11  -1 -2.5253  2.5891   2
 -12 -11  -1 39.3936  4.9695   3
 -12  11  -1 30.0093  4.9106   2
 -13 -11  -1 1.09392 2.83051   3
 -13  11  -1 -0.1948  3.1515   2
 -14 -12   1 1.38694 3.11560   3
 -14  12   1 -0.2503  3.2156   2
 -13 -12   1 1.61177 2.72996   3
 -13  12   1 -0.1744  3.0110   2
 -12 -12   1 6.91871 2.97224   3
 -12  12   1 1.67959 3.07932   2
 -11 -12   1 1.17441 2.22585   3
 -11  12   1 -1.7204  2.3970   2
 -10 -12   1 75.4187  5.8734   3
 -10  12   1 64.2959  6.4016   2
  -9 -12   1 4.57103 2.28754   3
   9  12  -1 1.32286 1.26611   1
  -9  12   1 8.62720 3.02730   2
  -8 -12   1 71.3930  5.5222   3
   8  12  -1 80.6482  5.7436   1
  -8  12   1 83.9428  6.4306   2
  -7 -12   1 11.7226  2.3557   3
   7  12  -1 17.1295  2.7366   1
  -7  12   1 13.0347  2.8080   2
  -6 -12   1 134.955   7.725   3
   6  12  -1 129.953   7.932   1
  -6  12   1 133.385   8.446   2
  -5 -12   1 -0.4467  1.1400   3
   5  12  -1 0.24404 1.34861   1
  -5  12   1 3.39815 1.18385   1
  -5  12   1 1.12187 1.48972   2
  -4 -12   1 199.651  10.550   3
   4  12  -1 192.918  10.977   1
  -4  12   1 212.885  10.625   1
  -4  12   1 217.170  11.729   2
  -3 -12   1 -0.6232  0.9739   3
  -3  12   1 -0.8406  1.2139   2
   3  12  -1 0.11393 1.19819   1
  -3  12   1 -1.0167  1.1239   1
   3  12  -1 0.49989 0.83435   2
  -2 -12   1 21.2403  2.4297   3
   2  12  -1 27.5919  2.2421   2
   2  12  -1 24.7016  2.7235   1
  -2  12   1 29.6476  2.5954   1
   1 -12  -1 2.08839 1.07381   3
  -1 -12   1 2.58735 1.14230   3
   1  12  -1 1.86274 1.09995   2
  -1  12   1 1.38383 1.28136   1
  -1  12   1 0.13252 1.06154   2
   1  12  -1 0.10309 1.17610   1
   0 -12  -1 0.51743 0.92258   3
   0 -12   1 -1.8939  0.7676   3
   0  12   1 1.49920 1.12913   1
   0  12  -1 0.45555 1.01189   1
   0  12   1 0.17261 0.94361   2
   0  12  -1 1.16153 1.08778   2
  -1 -12  -1 27.2767  2.4763   3
   1 -12   1 33.2271  2.7681   3
   1  12   1 32.3785  2.3854   2
   1  12   1 29.0412  2.7494   1
  -1  12  -1 31.9756  2.6827   1
  -2 -12  -1 149.796   8.104   3
  -2  12  -1 166.652   9.082   2
   2  12   1 149.000   8.577   1
  -2  12  -1 156.459   8.251   1
   2  12   1 152.654   8.043   2
  -3 -12  -1 18.1613  2.2202   3
  -3  12  -1 17.9591  2.6497   2
   3  12   1 16.6666  2.5214   1
  -3  12  -1 15.1413  2.0105   1
  -4 -12  -1 244.910  12.082   3
  -4  12  -1 245.010  11.967   1
   4  12   1 234.779  12.603   1
  -4  12  -1 223.266  13.237   2
  -5 -12  -1 4.80835 1.59163   3
  -5  12  -1 0.90276 1.02615   1
  -5  12  -1 1.16621 1.79125   2
   5  12   1 1.81472 1.46943   1
  -6 -12  -1 33.1425  3.5153   3
  -6  12  -1 34.1066  4.0635   2
   6  12   1 34.6901  3.7701   1
  -7 -12  -1 -3.2638  1.2968   3
   7  12   1 0.45605 1.52452   1
  -7  12  -1 -2.9885  1.7332   2
  -8 -12  -1 177.377  10.086   3
  -8  12  -1 169.363  11.094   2
   8  12   1 174.288  10.300   1
  -9 -12  -1 0.43171 2.12479   3
  -9  12  -1 -0.8559  2.3923   2
   9  12   1 -1.8991  1.5280   1
 -10 -12  -1 21.3654  3.6532   3
 -10  12  -1 17.2210  3.8590   2
 -11 -12  -1 -1.5430  2.0497   3
 -11  12  -1 -0.9529  2.5514   2
 -12 -12  -1 2.82566 2.84050   3
 -12  12  -1 9.10845 3.60758   2
 -13 -12  -1 -1.6653  2.7081   3
 -13  12  -1 -3.7981  3.0241   2
 -13 -13   1 -1.1131  2.6166   3
 -13  13   1 0.20605 3.11319   2
 -12 -13   1 26.0065  4.4584   3
 -12  13   1 20.3522  4.5440   2
 -11 -13   1 7.69293 2.94581   3
 -11  13   1 10.9864  3.3527   2
 -10 -13   1 33.2914  4.3735   3
 -10  13   1 37.4631  5.0256   2
  -9 -13   1 4.09336 2.30905   3
  -9  13   1 5.06476 2.92389   2
   9  13  -1 4.27880 2.40460   1
  -8 -13   1 10.2615  2.4031   3
   8  13  -1 10.7557  2.4772   1
  -8  13   1 3.58050 2.52907   2
  -7 -13   1 2.53249 1.65387   3
   7  13  -1 1.00488 1.73906   1
  -7  13   1 -1.7505  1.6517   2
  -6 -13   1 4.15857 1.66523   3
  -6  13   1 1.89368 1.77792   2
   6  13  -1 0.22723 1.65825   1
  -5 -13   1 2.12367 1.39757   3
  -5  13   1 -1.9498  1.0608   1
   5  13  -1 -1.0494  1.5039   1
  -5  13   1 -2.1232  1.5010   2
  -4 -13   1 152.305   8.166   3
   4  13  -1 143.885   8.519   1
  -4  13   1 140.672   8.787   2
  -4  13   1 150.292   8.094   1
  -3 -13   1 38.4532  3.1195   3
   3  13  -1 36.3713  3.3539   1
  -3  13   1 32.6693  3.0376   1
  -3  13   1 33.9511  3.3487   2
  -2 -13   1 365.901  17.833   3
   2  13  -1 364.234  18.612   1
  -2  13   1 385.501  18.512   1
   2  13  -1 374.112  19.042   2
  -1 -13   1 26.8082  2.6662   3
   1 -13  -1 22.7410  2.5451   3
   1  13  -1 23.9887  2.3574   2
  -1  13   1 23.5477  2.6758   1
  -1  13   1 26.8521  2.5571   2
   1  13  -1 25.7414  2.8466   1
   0 -13  -1 229.370  11.280   3
   0 -13   1 223.686  11.360   3
   0  13   1 219.544  11.817   1
   0  13  -1 223.531  11.737   1
   0  13   1 226.753  11.935   2
   0  13  -1 229.819  12.216   2
  -1 -13  -1 0.16907 1.00682   3
   1 -13   1 -0.1212  1.0234   3
  -1  13  -1 0.66771 0.96270   2
   1  13   1 -0.7227  1.2334   1
  -1  13  -1 1.21983 1.20721   1
   1  13   1 0.66925 0.86103   2
  -2 -13  -1 446.092  20.988   3
  -2  13  -1 474.635  23.227   2
  -2  13  -1 451.256  21.674   1
   2  13   1 404.644  21.898   1
  -3 -13  -1 39.6509  3.2617   3
  -3  13  -1 33.5985  3.5987   2
   3  13   1 43.4030  3.6991   1
  -3  13  -1 40.4710  3.1962   1
  -4 -13  -1 169.666   9.362   3
  -4  13  -1 176.955   9.289   1
  -4  13  -1 175.715  10.441   2
   4  13   1 182.266  10.008   1
  -5 -13  -1 4.58324 1.76240   3
  -5  13  -1 3.31771 2.17084   2
   5  13   1 2.44220 1.81939   1
  -6 -13  -1 1.26329 1.53708   3
  -6  13  -1 3.25365 2.06437   2
   6  13   1 5.56838 1.93805   1
  -7 -13  -1 2.46264 1.86010   3
  -7  13  -1 5.18604 2.58455   2
   7  13   1 2.58461 1.79861   1
  -8 -13  -1 13.8518  2.8174   3
   8  13   1 13.6076  2.9633   1
  -8  13  -1 5.91464 2.90460   2
  -9 -13  -1 1.91978 2.10824   3
   9  13   1 -2.5714  1.8955   1
  -9  13  -1 3.68296 2.74904   2
 -10 -13  -1 46.2496  5.1389   3
 -10  13  -1 38.7980  5.3046   2
 -11 -13  -1 1.12034 2.42960   3
 -11  13  -1 1.60394 2.87374   2
 -12 -13  -1 21.4536  4.0628   3
 -12  13  -1 28.5751  4.7698   2
 -13 -13  -1 3.68283 3.09401   3
 -13  13  -1 2.27843 3.75144   2
 -13 -14   1 -4.6292  2.5129   3
 -13  14   1 0.60056 3.44039   2
 -12 -14   1 3.07031 2.73388   3
 -12  14   1 4.40020 3.31544   2
 -11 -14   1 -1.7246  1.9135   3
 -11  14   1 4.39417 3.16943   2
 -10 -14   1 38.1457  4.4909   3
 -10  14   1 31.5847  4.8786   2
  10  14  -1 30.5217  4.4039   1
  -9 -14   1 22.8744  3.5886   3
  -9  14   1 18.4272  3.8825   2
   9  14  -1 25.9323  3.8887   1
  -8 -14   1 60.0569  5.1605   3
  -8  14   1 63.8874  5.7757   2
   8  14  -1 57.5523  5.2072   1
  -7 -14   1 9.09982 2.33548   3
  -7  14   1 6.12882 2.74254   2
   7  14  -1 6.51520 2.28598   1
  -6 -14   1 27.4940  3.1987   3
   6  14  -1 22.8126  3.2933   1
  -6  14   1 28.5617  3.8153   2
  -5 -14   1 44.2247  3.7916   3
  -5  14   1 39.3483  3.4251   1
  -5  14   1 39.3494  4.3545   2
   5  14  -1 49.9147  4.1637   1
  -4 -14   1 161.096   8.645   3
  -4  14   1 164.223   8.670   1
  -4  14   1 155.361   9.379   2
   4  14  -1 142.149   8.981   1
  -3 -14   1 61.6217  4.3385   3
   3  14  -1 57.1927  4.5093   1
  -3  14   1 60.7029  4.2875   1
  -3  14   1 55.5496  4.5064   2
  -2 -14   1 43.0214  3.4228   3
   2  14  -1 43.8780  3.2874   2
   2  14  -1 45.1176  3.7758   1
  -2  14   1 40.8973  3.5862   1
  -1 -14   1 11.5098  2.0044   3
   1 -14  -1 13.9972  2.1013   3
   1  14  -1 11.9230  1.9026   2
   1  14  -1 11.1977  2.0204   1
  -1  14   1 6.42116 1.86933   1
  -1  14   1 9.24355 1.82038   2
   0 -14   1 2.42977 1.23554   3
   0 -14  -1 -0.4604  1.0494   3
   0  14   1 1.68805 1.50200   1
   0  14  -1 -0.0194  1.1046   2
   0  14  -1 -0.4660  1.3928   1
   0  14   1 0.97227 1.14229   2
   1 -14   1 16.1297  2.3316   3
  -1 -14  -1 15.7560  2.1509   3
  -1  14  -1 14.9786  2.3432   1
   1  14   1 14.8315  2.4678   1
   1  14   1 13.7345  1.8314   2
  -1  14  -1 15.2850  2.3776   2
  -2 -14  -1 42.7059  3.3874   3
  -2  14  -1 42.6505  3.5298   1
  -2  14  -1 44.7256  3.8894   2
   2  14   1 37.7974  3.6644   1
  -3 -14  -1 9.79542 1.97689   3
   3  14   1 8.11199 2.19369   1
  -3  14  -1 10.2378  1.9405   1
  -3  14  -1 10.7141  2.3678   2
  -4 -14  -1 139.238   7.578   3
   4  14   1 125.260   7.939   1
  -4  14  -1 134.457   8.356   2
  -4  14  -1 122.343   7.244   1
  -5 -14  -1 81.8331  5.5383   3
  -5  14  -1 79.2068  6.0515   2
   5  14   1 77.3474  5.8032   1
  -6 -14  -1 31.4534  3.5115   3
   6  14   1 26.8392  3.5282   1
  -6  14  -1 19.7605  3.5146   2
  -7 -14  -1 33.7094  3.9172   3
   7  14   1 38.3993  4.3039   1
  -7  14  -1 33.0635  4.5221   2
  -8 -14  -1 43.4906  4.6189   3
   8  14   1 46.4579  5.1061   1
  -8  14  -1 39.4416  5.0658   2
  -9 -14  -1 16.3922  3.1415   3
  -9  14  -1 14.5257  3.6795   2
   9  14   1 17.5753  3.6316   1
 -10 -14  -1 18.3486  3.5165   3
 -10  14  -1 14.3238  3.7515   2
 -11 -14  -1 0.18323 2.56041   3
 -11  14  -1 4.18752 3.26090   2
 -12 -14  -1 3.37408 2.99709   3
 -12  14  -1 -0.5304  2.8504   2
 -13 -14  -1 -3.5482  2.9637   3
 -13  14  -1 -1.0025  3.4580   2
 -13 -15   1 5.75150 3.09914   3
 -13  15   1 8.95654 4.09200   2
 -12 -15   1 13.4373  3.5442   3
 -12  15   1 12.5144  4.1199   2
 -11 -15   1 7.47499 2.95709   3
 -11  15   1 5.07631 3.20833   2
 -10 -15   1 14.9583  3.3253   3
  10  15  -1 7.02899 2.76021   1
 -10  15   1 10.3061  3.4729   2
  -9 -15   1 13.5025  3.0711   3
  -9  15   1 11.3609  3.5380   2
   9  15  -1 16.3195  3.3740   1
  -8 -15   1 11.8628  2.8666   3
  -8  15   1 8.47883 3.05713   2
   8  15  -1 6.88551 2.59107   1
  -7 -15   1 -1.5912  1.5973   3
  -7  15   1 -2.9845  2.0354   2
   7  15  -1 0.29230 2.00457   1
  -6 -15   1 8.01675 2.05153   3
  -6  15   1 1.26748 2.30002   2
   6  15  -1 5.62637 2.32373   1
  -5 -15   1 45.7056  3.8557   3
   5  15  -1 48.8274  4.3213   1
  -5  15   1 31.2033  4.2033   2
  -5  15   1 38.5424  3.8273   1
  -4 -15   1 138.948   7.652   3
   4  15  -1 112.179   7.603   1
  -4  15   1 130.350   7.451   1
  -4  15   1 121.456   8.015   2
  -3 -15   1 30.9308  3.3518   3
   3  15  -1 32.6817  3.7240   1
  -3  15   1 34.0191  3.7552   2
  -3  15   1 34.0490  3.4847   1
  -2 -15   1 131.231   7.383   3
  -2  15   1 130.883   7.615   1
   2  15  -1 126.575   7.694   1
  -2  15   1 128.421   7.857   2
   1 -15  -1 81.7020  5.1823   3
  -1 -15   1 82.7877  5.2529   3
   1  15  -1 80.0966  5.4989   1
  -1  15   1 84.7045  5.5495   1
   1  15  -1 80.2876  5.2574   2
  -1  15   1 78.4280  5.3145   2
   0 -15   1 158.134   8.816   3
   0 -15  -1 162.145   8.775   3
   0  15   1 160.777   9.064   2
   0  15   1 158.892   9.191   1
   0  15  -1 171.606   9.426   2
   0  15  -1 163.602   9.164   1
   1 -15   1 120.744   6.931   3
  -1 -15  -1 111.855   6.639   3
  -1  15  -1 127.213   7.388   2
  -1  15  -1 116.518   7.045   1
   1  15   1 107.133   7.102   1
  -2 -15  -1 120.810   6.658   3
  -2  15  -1 106.858   7.183   2
  -2  15  -1 113.044   6.803   1
   2  15   1 108.356   7.050   1
  -3 -15  -1 1.28678 1.49916   3
  -3  15  -1 0.28268 1.70603   2
   3  15   1 -0.2750  1.6897   1
  -3  15  -1 3.01476 1.66541   1
  -4 -15  -1 178.711   9.175   3
  -4  15  -1 152.891   9.966   2
  -4  15  -1 145.895   8.804   1
   4  15   1 176.197   9.772   1
  -5 -15  -1 5.19518 2.00720   3
   5  15   1 8.07384 2.59380   1
  -5  15  -1 2.84231 2.27695   2
  -6 -15  -1 5.89898 2.19375   3
  -6  15  -1 3.51814 2.51394   2
   6  15   1 1.94081 2.12722   1
  -7 -15  -1 3.77510 2.17277   3
  -7  15  -1 3.16526 2.64688   2
   7  15   1 3.21898 2.16508   1
  -8 -15  -1 2.04162 2.14405   3
   8  15   1 6.43860 2.78188   1
  -8  15  -1 -1.8531  2.3073   2
  -9 -15  -1 11.2234  2.9038   3
   9  15   1 11.5567  3.3895   1
  -9  15  -1 11.5628  3.5163   2
 -10 -15  -1 15.9381  3.4911   3
 -10  15  -1 20.2847  4.3027   2
 -11 -15  -1 8.34075 3.06457   3
 -11  15  -1 5.90100 3.60957   2
 -12 -15  -1 16.1122  3.8923   3
 -12  15  -1 14.4960  4.2887   2
 -12 -16   1 1.88974 2.79198   3
 -12  16   1 -0.4577  3.1468   2
 -11 -16   1 1.74575 2.72233   3
 -11  16   1 0.22094 2.88657   2
 -10 -16   1 15.2769  3.4989   3
  10  16  -1 11.6463  3.2987   1
 -10  16   1 12.2976  3.6939   2
  -9 -16   1 23.5974  3.7839   3
   9  16  -1 23.8642  4.0863   1
  -9  16   1 23.7934  4.3128   2
  -8 -16   1 52.7754  4.7650   3
   8  16  -1 53.5847  5.5694   1
  -8  16   1 46.4260  5.4990   2
  -7 -16   1 56.7263  5.0431   3
   7  16  -1 64.7075  5.5186   1
  -7  16   1 60.1012  5.6946   2
  -6 -16   1 19.6081  3.0504   3
  -6  16   1 20.3417  3.5773   2
   6  16  -1 15.2024  3.1922   1
  -5 -16   1 85.3587  5.7992   3
   5  16  -1 92.3560  6.3568   1
  -5  16   1 72.0801  6.1029   2
  -4 -16   1 150.988   8.566   3
  -4  16   1 150.982   8.666   1
   4  16  -1 144.623   9.031   1
  -4  16   1 142.498   9.307   2
  -3 -16   1 159.194   8.874   3
   3  16  -1 152.721   9.212   1
  -3  16   1 147.098   9.372   2
  -3  16   1 158.569   9.020   1
  -2 -16   1 23.7615  2.8910   3
  -2  16   1 20.7486  2.9169   2
  -2  16   1 26.4599  3.1751   1
   2  16  -1 17.5661  3.0336   1
  -1 -16   1 2.23873 1.50457   3
   1 -16  -1 0.69389 1.33838   3
  -1  16   1 -0.6430  1.2687   2
  -1  16   1 2.49200 1.70242   1
   1  16  -1 0.69921 1.63602   1
   0 -16  -1 1.22292 1.27791   3
   0 -16   1 0.29294 1.22880   3
   0  16  -1 -1.1521  1.2493   2
   0  16   1 -0.1367  1.5018   1
   0  16  -1 -1.2735  1.4182   1
   0  16   1 -1.5675  1.1073   2
  -1 -16  -1 1.26255 1.32855   3
  -1  16  -1 -0.4773  1.4284   2
  -1  16  -1 -1.6157  1.4576   1
   1  16   1 3.58116 1.77182   1
  -2 -16  -1 14.7142  2.4188   3
  -2  16  -1 14.7778  2.7004   2
  -2  16  -1 23.2134  2.8787   1
   2  16   1 16.2748  2.8591   1
  -3 -16  -1 20.9124  2.9156   3
   3  16   1 15.9673  3.1063   1
  -3  16  -1 17.0418  2.5650   1
  -3  16  -1 21.4057  3.1985   2
  -4 -16  -1 146.767   8.697   3
  -4  16  -1 156.445   9.719   2
   4  16   1 148.575   9.355   1
  -4  16  -1 157.807   8.723   1
  -5 -16  -1 61.9813  5.0646   3
   5  16   1 78.9945  5.8352   1
  -5  16  -1 66.6985  5.9900   2
  -6 -16  -1 60.2049  4.8681   3
   6  16   1 57.9263  5.3057   1
  -6  16  -1 58.9071  5.6023   2
  -7 -16  -1 80.3107  6.1250   3
   7  16   1 95.8673  7.0516   1
  -7  16  -1 87.7666  7.2684   2
  -8 -16  -1 31.9278  4.0622   3
  -8  16  -1 20.4777  4.0447   2
   8  16   1 25.3305  4.2465   1
  -9 -16  -1 21.0399  3.5936   3
   9  16   1 16.2614  3.7589   1
  -9  16  -1 16.7720  4.0056   2
 -10 -16  -1 6.78220 3.01553   3
 -10  16  -1 10.9988  3.6335   2
 -11 -16  -1 0.13053 2.48982   3
 -11  16  -1 -0.1991  3.0753   2
 -12 -16  -1 2.92040 3.05350   3
 -12  16  -1 -0.5543  3.4238   2
 -12 -17   1 3.54813 3.03552   3
 -12  17   1 1.09343 3.45195   2
 -11 -17   1 9.22388 3.30119   3
 -11  17   1 8.26669 3.69815   2
 -10 -17   1 1.03759 2.45583   3
 -10  17   1 -0.8193  2.9325   2
  10  17  -1 6.53769 3.25348   1
  -9 -17   1 4.98613 2.51644   3
  -9  17   1 2.74848 3.21513   2
   9  17  -1 6.21744 3.13965   1
  -8 -17   1 -1.1566  1.8445   3
  -8  17   1 -0.0228  2.6115   2
   8  17  -1 -0.8053  2.3111   1
  -7 -17   1 -2.9139  1.8053   3
   7  17  -1 -0.0488  2.3560   1
  -7  17   1 2.63766 2.88375   2
  -6 -17   1 -3.8394  1.6406   3
  -6  17   1 -1.8323  2.4027   2
   6  17  -1 -1.2650  2.3163   1
  -5 -17   1 31.7968  3.7648   3
  -5  17   1 28.8589  4.0587   2
   5  17  -1 30.7524  4.1305   1
  -4 -17   1 74.3941  5.4277   3
  -4  17   1 75.4198  5.4556   1
  -4  17   1 75.0678  5.9645   2
   4  17  -1 67.8742  5.7422   1
  -3 -17   1 11.1108  2.4932   3
  -3  17   1 9.52949 2.66776   2
   3  17  -1 9.68154 2.61662   1
  -3  17   1 13.2591  2.7491   1
  -2 -17   1 36.2481  3.8469   3
  -2  17   1 39.5946  4.0305   1
  -2  17   1 36.7650  3.6300   2
   2  17  -1 23.9771  3.3559   1
  -1 -17   1 15.6826  2.6556   3
   1 -17  -1 22.5911  2.8636   3
  -1  17   1 19.4079  2.9558   1
   1  17  -1 15.2201  2.8068   1
  -1  17   1 23.1949  2.8415   2
   0 -17   1 2.98646 1.67941   3
   0 -17  -1 1.77074 1.63807   3
   0  17  -1 4.70639 1.75203   2
   0  17   1 5.28398 2.01229   1
   0  17  -1 5.38739 2.06690   1
  -1 -17  -1 52.6892  4.2438   3
   1  17   1 49.4872  4.5950   1
  -1  17  -1 62.1254  4.7126   1
  -1  17  -1 63.6156  4.7935   2
  -2 -17  -1 138.451   7.729   3
   2  17   1 122.593   8.155   1
  -2  17  -1 127.456   7.942   1
  -3 -17  -1 21.6424  3.0630   3
  -3  17  -1 24.0755  3.0838   1
  -3  17  -1 25.8384  3.5372   2
   3  17   1 17.3392  3.2716   1
  -4 -17  -1 14.8069  2.8953   3
  -4  17  -1 15.7244  3.0918   2
  -4  17  -1 14.2387  2.5815   1
   4  17   1 11.0218  2.8153   1
  -5 -17  -1 5.21198 2.19662   3
  -5  17  -1 2.64255 2.41383   2
   5  17   1 3.83096 2.41237   1
  -6 -17  -1 2.14632 2.13417   3
   6  17   1 2.28872 2.46307   1
  -6  17  -1 3.76592 2.63119   2
  -7 -17  -1 -0.0474  1.8709   3
  -7  17  -1 0.35730 2.79248   2
   7  17   1 -2.2742  1.9813   1
  -8 -17  -1 1.33954 2.04206   3
  -8  17  -1 1.40432 2.60964   2
   8  17   1 0.02339 2.49015   1
  -9 -17  -1 4.78788 2.68383   3
  -9  17  -1 0.12392 2.91319   2
   9  17   1 6.77917 3.35787   1
 -10 -17  -1 6.93804 2.98395   3
  10  17   1 6.22432 3.05344   1
 -10  17  -1 8.00125 3.51832   2
 -11 -17  -1 12.7736  3.7518   3
 -11  17  -1 8.32576 3.90717   2
 -11 -18   1 1.65309 2.58841   3
 -11  18   1 -0.1006  3.2341   2
 -10 -18   1 -0.1488  2.4661   3
 -10  18   1 -4.4354  2.5572   2
  10  18  -1 0.71456 2.86201   1
  -9 -18   1 16.1074  3.2300   3
   9  18  -1 18.3614  3.9963   1
  -9  18   1 21.2994  4.4137   2
  -8 -18   1 20.8004  3.6140   3
   8  18  -1 18.4114  3.9660   1
  -8  18   1 15.2277  3.7683   2
  -7 -18   1 57.7373  5.2246   3
  -7  18   1 51.9596  5.8810   2
   7  18  -1 47.2152  5.6952   1
  -6 -18   1 18.0585  3.2137   3
   6  18  -1 10.9236  3.2988   1
  -6  18   1 19.2770  3.7894   2
  -5 -18   1 60.2414  4.9637   3
   5  18  -1 54.5465  5.7162   1
  -5  18   1 53.9123  5.5349   2
  -4 -18   1 3.91375 2.16136   3
   4  18  -1 6.86159 2.68552   1
  -4  18   1 9.70241 2.77073   2
  -4  18   1 7.90264 2.48450   1
  -3 -18   1 74.5899  5.4873   3
   3  18  -1 69.1946  5.7963   1
  -3  18   1 78.0518  5.7493   1
  -2 -18   1 6.45333 2.18466   3
   2  18  -1 4.73101 2.18703   1
  -2  18   1 5.16845 2.16685   2
  -2  18   1 7.27591 2.32233   1
  -1 -18   1 -0.9763  1.5219   3
   1 -18  -1 -0.9565  1.5070   3
  -1  18   1 -1.2761  1.7470   1
   1  18  -1 -2.2497  1.7383   1
   0 -18   1 3.07912 1.75354   3
   0 -18  -1 1.45446 1.56982   3
   0  18   1 0.52190 1.76277   1
   0  18  -1 -1.3605  1.7844   1
  -1 -18  -1 4.33673 1.93984   3
  -1  18  -1 3.92395 2.05464   2
  -1  18  -1 4.49681 2.45428   1
   1  18   1 4.93390 1.91519   1
  -2 -18  -1 3.33785 1.88139   3
   2  18   1 -1.6819  1.9118   1
  -2  18  -1 7.47393 2.32987   1
  -2  18  -1 -0.2409  0.9922   2
  -3 -18  -1 40.2338  4.2206   3
  -3  18  -1 45.4654  4.8164   2
   3  18   1 42.9031  4.7085   1
  -3  18  -1 42.0071  3.9465   1
  -4 -18  -1 6.42145 2.23154   3
  -4  18  -1 10.3207  2.8691   2
  -4  18  -1 8.13537 2.22073   1
   4  18   1 7.71597 2.78618   1
  -5 -18  -1 50.2922  4.6222   3
   5  18   1 46.4745  5.3137   1
  -5  18  -1 51.2293  5.2360   2
  -6 -18  -1 7.26994 2.54220   3
  -6  18  -1 9.16045 3.16775   2
   6  18   1 9.36927 3.00008   1
  -7 -18  -1 39.5586  4.5131   3
  -7  18  -1 47.9941  5.7341   2
   7  18   1 32.5296  4.8363   1
  -8 -18  -1 11.6460  3.0254   3
   8  18   1 17.8296  3.9891   1
  -8  18  -1 17.3150  4.0594   2
  -9 -18  -1 13.3258  3.5044   3
  -9  18  -1 17.1606  4.2871   2
   9  18   1 22.1155  4.3703   1
 -10 -18  -1 5.02746 2.66430   3
  10  18   1 8.01339 3.54003   1
 -10  18  -1 1.48592 3.34521   2
 -11 -18  -1 3.46503 3.06921   3
 -11  18  -1 1.89357 3.40780   2
 -11 -19   1 6.77266 3.19076   3
 -11  19   1 8.61548 4.18617   2
 -10 -19   1 -1.8628  2.2265   3
 -10  19   1 -1.2257  2.7983   2
  10  19  -1 2.93974 3.23220   1
  -9 -19   1 7.12435 2.82433   3
   9  19  -1 9.62053 3.26767   1
  -9  19   1 12.0004  3.8180   2
  -8 -19   1 2.13206 2.49709   3
  -8  19   1 -3.8424  2.4937   2
   8  19  -1 -2.5285  2.6622   1
  -7 -19   1 -1.3571  1.9215   3
  -7  19   1 1.26664 2.65319   2
   7  19  -1 3.14711 2.68620   1
  -6 -19   1 -5.3702  1.8159   3
  -6  19   1 1.52816 2.58533   2
   6  19  -1 -2.6144  2.2388   1
  -5 -19   1 17.4434  3.0999   3
   5  19  -1 15.4667  3.4598   1
  -5  19   1 11.3855  3.1130   2
  -4 -19   1 17.0241  3.0713   3
   4  19  -1 14.2597  3.2519   1
  -4  19   1 10.4329  2.8577   1
  -4  19   1 15.5978  3.2966   2
  -3 -19   1 82.7131  6.1016   3
  -3  19   1 94.4941  6.4170   1
   3  19  -1 74.5821  6.2875   1
  -2 -19   1 9.71865 2.50871   3
  -2  19   1 12.5181  2.7892   2
  -2  19   1 13.6042  2.8812   1
   2  19  -1 9.49481 2.70280   1
   1 -19  -1 56.3890  4.6319   3
  -1 -19   1 54.4341  4.7422   3
   1  19  -1 41.0694  4.7469   1
  -1  19   1 58.4481  4.8515   1
   0 -19  -1 6.37146 2.16704   3
   0 -19   1 9.91075 2.45299   3
   0  19  -1 13.5936  2.9320   1
   0  19   1 11.4937  2.8141   1
  -1 -19  -1 74.9178  5.3333   3
   1  19   1 76.4474  5.8965   1
  -1  19  -1 73.0761  5.6659   1
  -1  19  -1 64.1412  5.4028   2
  -2 -19  -1 2.73262 1.87486   3
  -2  19  -1 0.42701 1.81381   2
   2  19   1 2.39722 2.30144   1
  -2  19  -1 3.19765 2.28107   1
  -3 -19  -1 70.2355  5.3996   3
  -3  19  -1 76.4512  5.5951   1
  -3  19  -1 76.7071  6.0286   2
   3  19   1 62.6027  5.7970   1
  -4 -19  -1 3.21124 2.09391   3
   4  19   1 1.83904 2.39104   1
  -4  19  -1 0.83096 2.38589   2
  -5 -19  -1 6.03798 2.38221   3
  -5  19  -1 7.68921 3.13596   2
   5  19   1 6.47042 2.71939   1
  -6 -19  -1 2.82205 2.36780   3
   6  19   1 0.86709 2.65145   1
  -6  19  -1 -0.3927  2.5440   2
  -7 -19  -1 3.36715 2.38640   3
  -7  19  -1 -2.5787  2.4284   2
   7  19   1 -1.1927  2.3985   1
  -8 -19  -1 3.33697 2.62462   3
  -8  19  -1 -0.8066  2.7999   2
   8  19   1 -3.3691  2.5896   1
  -9 -19  -1 3.95220 2.59285   3
  -9  19  -1 4.31450 3.60334   2
   9  19   1 5.63168 3.37079   1
 -10 -19  -1 -0.9837  2.6350   3
 -10  19  -1 2.75631 3.61497   2
  10  19   1 1.72801 2.86804   1
 -11 -19  -1 13.5302  3.7757   3
 -11  19  -1 11.4571  4.3726   2
 -10 -20   1 2.84612 2.78943   3
 -10  20   1 3.96918 3.31862   2
  10  20  -1 1.48037 3.09756   1
  -9 -20   1 10.8900  3.4192   3
   9  20  -1 16.6389  4.2347   1
  -9  20   1 9.73053 4.02506   2
  -8 -20   1 1.96246 2.35075   3
  -8  20   1 -0.6524  2.9272   2
   8  20  -1 5.70154 3.23275   1
  -7 -20   1 36.6545  4.6822   3
   7  20  -1 42.5607  5.4119   1
  -7  20   1 38.1967  5.3341   2
  -6 -20   1 0.15440 2.11891   3
  -6  20   1 -0.8412  2.5859   2
   6  20  -1 4.01864 2.80144   1
  -5 -20   1 36.5957  4.4972   3
  -5  20   1 36.3817  4.8765   2
   5  20  -1 40.6960  5.0251   1
  -4 -20   1 0.61150 2.12593   3
  -4  20   1 -0.4167  2.1230   2
   4  20  -1 2.66833 2.46682   1
  -4  20   1 -3.9729  2.0242   1
  -3 -20   1 33.4500  3.9735   3
  -3  20   1 27.2563  3.9035   1
  -3  20   1 19.9441  3.3674   2
   3  20  -1 27.4867  4.0355   1
  -2 -20   1 -0.8840  2.0185   3
   2  20  -1 1.93692 2.42876   1
  -2  20   1 -0.7724  2.4779   1
   1 -20  -1 5.21322 2.20576   3
  -1 -20   1 6.74847 2.48232   3
   1  20  -1 10.4104  2.9506   1
  -1  20   1 8.90483 2.75317   1
   0 -20  -1 0.41117 1.88943   3
   0 -20   1 -2.0618  1.8364   3
   0  20  -1 -1.0657  2.1821   1
   0  20   1 2.68234 2.31532   1
  -1 -20  -1 4.95878 2.18290   3
  -1  20  -1 3.79300 2.53909   1
   1  20   1 0.27885 2.39812   1
  -2 -20  -1 2.01433 2.16381   3
  -2  20  -1 -0.1896  2.1446   1
   2  20   1 -1.4032  2.3259   1
  -2  20  -1 -1.8452  1.8822   2
  -3 -20  -1 25.8065  3.7306   3
  -3  20  -1 24.4767  3.7238   1
  -3  20  -1 27.1184  4.0311   2
   3  20   1 26.4039  4.0756   1
  -4 -20  -1 0.03094 2.05119   3
   4  20   1 -0.4547  2.1841   1
  -4  20  -1 -2.5063  2.3737   2
  -5 -20  -1 53.7653  4.8675   3
   5  20   1 46.2127  5.5501   1
  -5  20  -1 49.3908  5.6761   2
  -6 -20  -1 -0.0088  2.0280   3
  -6  20  -1 -0.9320  2.5334   2
   6  20   1 0.23206 2.65571   1
  -7 -20  -1 32.3797  4.4322   3
   7  20   1 30.7154  5.1187   1
  -7  20  -1 34.0354  5.1249   2
  -8 -20  -1 0.42897 2.45939   3
   8  20   1 3.25113 3.17690   1
  -8  20  -1 0.16321 3.05462   2
  -9 -20  -1 20.7980  3.9710   3
   9  20   1 22.2215  4.7272   1
  -9  20  -1 16.7856  4.5934   2
 -10 -20  -1 5.02136 2.89883   3
  10  20   1 2.52706 3.19809   1
 -10  20  -1 -3.0992  3.2840   2
 -10 -21   1 -1.6865  2.8195   3
 -10  21   1 1.05101 3.33745   2
  10  21  -1 -0.6214  3.2181   1
  -9 -21   1 3.24989 2.89111   3
  -9  21   1 1.11752 3.32553   2
   9  21  -1 0.70690 3.04301   1
  -8 -21   1 2.26139 2.70555   3
  -8  21   1 -1.4371  2.9721   2
   8  21  -1 0.45140 3.02974   1
  -7 -21   1 1.67934 2.32936   3
  -7  21   1 -1.0997  2.8376   2
   7  21  -1 0.38002 2.90380   1
  -6 -21   1 3.88784 2.58515   3
  -6  21   1 1.99926 2.68346   2
   6  21  -1 -2.2905  2.5135   1
  -5 -21   1 3.22989 2.44258   3
   5  21  -1 2.25716 2.68574   1
  -5  21   1 2.99795 2.72673   2
  -4 -21   1 3.85289 2.35565   3
  -4  21   1 1.80068 2.58506   2
   4  21  -1 -1.6384  2.4495   1
  -3 -21   1 30.8184  4.0523   3
   3  21  -1 39.5263  4.8882   1
  -3  21   1 30.7899  4.2601   1
  -2 -21   1 4.77892 2.28336   3
  -2  21   1 -0.4773  2.4493   1
  -1 -21   1 93.2758  6.7055   3
  -1  21   1 83.2516  6.7587   1
   1  21  -1 93.8689  6.9543   1
   0 -21   1 9.86607 2.86711   3
   0 -21  -1 5.42552 2.35858   3
   0  21   1 9.09370 2.94654   1
   0  21  -1 8.30822 2.72973   1
  -1 -21  -1 72.0460  5.5885   3
   1  21   1 58.6114  5.6258   1
  -1  21  -1 62.2260  5.4949   1
  -2 -21  -1 -0.2200  1.9648   3
  -2  21  -1 0.97871 2.33630   1
   2  21   1 -1.7888  2.0638   1
  -3 -21  -1 60.1354  5.2087   3
  -3  21  -1 51.8250  5.5010   2
  -3  21  -1 65.3957  5.4898   1
   3  21   1 58.7822  5.6289   1
  -4 -21  -1 3.74399 2.45692   3
  -4  21  -1 2.13131 2.65359   2
   4  21   1 -0.7880  2.4263   1
  -5 -21  -1 8.78391 2.81287   3
   5  21   1 7.63279 3.05444   1
  -5  21  -1 5.81624 3.09125   2
  -6 -21  -1 -0.3826  2.1468   3
   6  21   1 0.09542 2.85185   1
  -6  21  -1 6.07627 3.08841   2
  -7 -21  -1 5.28149 2.68863   3
  -7  21  -1 2.93392 3.44410   2
   7  21   1 0.02577 2.93508   1
  -8 -21  -1 0.20000 2.63754   3
  -8  21  -1 0.68929 3.26942   2
   8  21   1 -1.5653  2.9590   1
  -9 -21  -1 1.48014 2.87413   3
   9  21   1 6.19062 3.74057   1
  -9  21  -1 2.85662 3.50058   2
  -9 -22   1 12.2073  3.5722   3
  -9  22   1 7.32898 3.81614   2
   9  22  -1 11.4197  4.3193   1
  -8 -22   1 -2.1041  2.4737   3
   8  22  -1 2.43587 3.07299   1
  -8  22   1 -0.0073  3.0178   2
  -7 -22   1 23.3895  3.9859   3
  -7  22   1 17.4785  4.3396   2
   7  22  -1 22.5177  4.6537   1
  -6 -22   1 -3.8019  2.1530   3
   6  22  -1 -0.9552  2.6187   1
  -6  22   1 0.33986 2.88285   2
  -5 -22   1 23.2298  3.9338   3
   5  22  -1 20.9565  4.0832   1
  -5  22   1 27.3131  4.3257   2
  -4 -22   1 -1.8760  2.2277   3
  -4  22   1 1.06828 2.65048   2
   4  22  -1 -1.0818  2.5338   1
  -3 -22   1 12.5266  3.0748   3
   3  22  -1 14.6929  3.7044   1
  -3  22   1 14.1101  3.5184   1
  -2 -22   1 -1.3669  2.0761   3
   2  22  -1 -2.5546  2.3527   1
  -2  22   1 -5.7420  2.1021   1
  -1 -22   1 0.96528 2.24378   3
  -1  22   1 2.47697 2.83484   1
   1  22  -1 -2.2769  2.4821   1
   0 -22  -1 -0.4032  2.1010   3
   0 -22   1 -1.9142  2.1949   3
   0  22  -1 -1.7929  2.4333   1
   0  22   1 -0.2270  2.5460   1
  -1 -22  -1 1.94008 2.34904   3
  -1  22  -1 3.20293 2.81160   1
   1  22   1 0.74745 2.70239   1
  -2 -22  -1 0.30910 2.20417   3
   2  22   1 -2.3590  2.4716   1
  -2  22  -1 -1.0036  2.2773   1
  -3 -22  -1 18.6606  3.4183   3
   3  22   1 20.0916  3.9746   1
  -3  22  -1 19.2384  3.6209   1
  -4 -22  -1 1.82302 2.37793   3
   4  22   1 -2.4640  2.4208   1
  -4  22  -1 0.88478 2.74231   2
  -5 -22  -1 19.2063  3.5932   3
  -5  22  -1 18.9339  4.0098   2
   5  22   1 22.2245  4.4380   1
  -6 -22  -1 -0.3796  2.1893   3
   6  22   1 -1.7472  2.8613   1
  -6  22  -1 -1.7761  2.7208   2
  -7 -22  -1 23.3835  3.9845   3
  -7  22  -1 21.3020  4.5779   2
   7  22   1 16.0448  4.6100   1
  -8 -22  -1 -1.1612  2.4352   3
  -8  22  -1 -0.9609  3.3166   2
   8  22   1 -2.4954  3.3082   1
  -9 -22  -1 12.3243  3.5278   3
  -9  22  -1 20.1017  5.0974   2
   9  22   1 15.3634  4.5325   1
  -8 -23   1 0.88347 2.73034   3
   8  23  -1 -1.3899  3.0048   1
  -8  23   1 -4.1811  2.8558   2
  -7 -23   1 -1.1105  2.4863   3
  -7  23   1 -0.5731  3.0219   2
   7  23  -1 0.25920 2.94274   1
  -6 -23   1 0.82500 2.47162   3
  -6  23   1 1.63412 3.22579   2
   6  23  -1 -1.9148  2.7675   1
  -5 -23   1 0.96148 2.44277   3
   5  23  -1 4.19027 2.95205   1
  -5  23   1 1.90313 2.82206   2
  -4 -23   1 -1.2045  2.3220   3
   4  23  -1 2.40488 2.78720   1
  -3 -23   1 15.1601  3.3951   3
   3  23  -1 10.7128  3.3912   1
  -3  23   1 19.1583  3.9186   1
  -2 -23   1 7.57435 2.92130   3
   2  23  -1 7.05046 3.10085   1
  -2  23   1 3.51637 2.94009   1
  -1 -23   1 42.1107  4.9564   3
  -1  23   1 41.3873  5.3702   1
   1  23  -1 37.1918  5.0164   1
   0 -23  -1 8.51991 2.99939   3
   0  23   1 9.55342 3.30996   1
   0  23  -1 5.80274 2.98419   1
  -1 -23  -1 53.2779  5.4133   3
  -1  23  -1 42.1845  5.2962   1
   1  23   1 51.8096  5.8504   1
  -2 -23  -1 3.76449 2.55310   3
  -2  23  -1 4.76795 2.92029   1
   2  23   1 4.78025 2.88232   1
  -3 -23  -1 16.8279  3.4387   3
   3  23   1 18.1426  3.9650   1
  -3  23  -1 16.1859  3.4863   1
  -4 -23  -1 -1.9196  2.1232   3
   4  23   1 2.25221 2.85859   1
  -4  23  -1 -2.7694  2.5761   2
  -5 -23  -1 11.3224  2.9765   3
  -5  23  -1 3.25183 3.32570   2
   5  23   1 0.24602 2.94558   1
  -6 -23  -1 0.88871 2.76193   3
  -6  23  -1 1.54005 3.13541   2
   6  23   1 -2.6917  2.9472   1
  -7 -23  -1 4.41154 2.71578   3
   7  23   1 -3.2998  2.8417   1
  -7  23  -1 0.10309 3.18150   2
  -8 -23  -1 -1.9760  2.3982   3
  -8  23  -1 -3.0482  3.2801   2
   8  23   1 -2.4101  3.1239   1
  -8 -24   1 -0.1739  3.0215   3
  -8  24   1 -2.3467  2.9579   2
   8  24  -1 -0.9975  3.2472   1
  -7 -24   1 13.2195  3.5684   3
  -7  24   1 12.0949  3.9756   2
   7  24  -1 13.8399  4.3147   1
  -6 -24   1 2.27942 2.55227   3
  -6  24   1 -3.1992  2.8947   2
   6  24  -1 -2.2433  2.7059   1
  -5 -24   1 17.0046  3.5985   3
   5  24  -1 11.3417  3.7072   1
  -4 -24   1 9.29584 3.21261   3
   4  24  -1 5.33995 3.42456   1
  -3 -24   1 7.07537 2.87605   3
  -3  24   1 5.94532 3.21904   1
   3  24  -1 6.55376 3.35105   1
  -2 -24   1 2.19796 2.75701   3
  -2  24   1 0.02443 2.79067   1
   2  24  -1 0.91451 3.21497   1
  -1 -24   1 -3.1381  2.3260   3
   1  24  -1 1.32196 2.92340   1
  -1  24   1 -4.0546  2.8301   1
   0 -24  -1 3.45882 2.57087   3
   0  24   1 -3.2899  2.6660   1
   0  24  -1 1.89399 2.87445   1
  -1 -24  -1 2.92950 2.64949   3
   1  24   1 1.18341 3.01278   1
  -1  24  -1 3.98065 3.21129   1
  -2 -24  -1 1.83686 2.59345   3
  -2  24  -1 0.11472 2.47247   1
   2  24   1 -1.0200  2.8737   1
  -3 -24  -1 6.80739 2.90886   3
   3  24   1 3.72704 3.31020   1
  -4 -24  -1 3.99700 2.82509   3
   4  24   1 3.22984 3.23293   1
  -5 -24  -1 14.0603  3.5405   3
   5  24   1 16.6347  4.2009   1
  -5  24  -1 12.2437  4.1818   2
  -6 -24  -1 6.19519 3.06047   3
  -6  24  -1 2.19247 3.42300   2
   6  24   1 -2.9307  3.0701   1
  -7 -24  -1 9.82686 3.33881   3
  -7  24  -1 5.57951 3.74485   2
   7  24   1 8.17786 3.95087   1
  -7 -25   1 1.64068 3.01000   3
  -7  25   1 0.41625 3.35873   2
   7  25  -1 -1.8841  3.1883   1
  -6 -25   1 -1.9838  2.6607   3
   6  25  -1 -1.6009  3.0962   1
  -5 -25   1 1.13434 2.74911   3
   5  25  -1 1.98147 3.16240   1
  -4 -25   1 -0.4568  2.6805   3
   4  25  -1 0.99295 3.14884   1
  -3 -25   1 12.3285  3.6324   3
   3  25  -1 5.26315 3.44118   1
  -2 -25   1 9.73213 3.24990   3
   2  25  -1 10.7439  3.8109   1
  -2  25   1 7.27890 3.34937   1
  -1 -25   1 28.9088  4.5409   3
  -1  25   1 31.4034  5.0477   1
   1  25  -1 28.2753  4.9176   1
   0  25   1 15.5252  4.0548   1
   0  25  -1 21.5991  4.3507   1
  -1 -25  -1 26.4647  4.2776   3
   1  25   1 27.3164  4.9164   1
  -1  25  -1 27.1651  4.4656   1
  -2 -25  -1 11.0966  3.5457   3
  -2  25  -1 11.3012  3.6097   1
   2  25   1 3.98536 3.42371   1
  -3 -25  -1 10.6277  3.1723   3
   3  25   1 7.38904 3.95651   1
  -4 -25  -1 0.81710 2.60047   3
   4  25   1 2.82882 3.50833   1
  -5 -25  -1 6.25332 3.12915   3
   5  25   1 3.55100 3.67899   1
  -6 -25  -1 2.27288 2.80068   3
   6  25   1 -0.2824  3.3066   1
  -6  25  -1 0.02102 3.50861   2
  -5 -26   1 3.28495 2.96006   3
   5  26  -1 1.66508 3.29099   1
  -4 -26   1 2.22968 2.76718   3
   4  26  -1 5.06716 3.42064   1
  -3 -26   1 5.17221 3.21934   3
   3  26  -1 -0.5811  3.2255   1
  -2 -26   1 1.29822 2.76936   3
  -2  26   1 2.77296 3.06832   1
   2  26  -1 4.04036 3.31098   1
  -1 -26   1 2.82379 2.78357   3
  -1  26   1 -0.6522  3.2784   1
   1  26  -1 5.68007 3.44388   1
   0  26   1 2.75811 3.21740   1
   0  26  -1 0.16334 2.93795   1
  -1 -26  -1 4.98182 3.09717   3
  -1  26  -1 2.73340 3.49585   1
   1  26   1 -1.6205  3.0731   1
  -2 -26  -1 0.86526 2.96510   3
  -2  26  -1 8.26451 3.58301   1
   2  26   1 -0.0224  3.3497   1
  -3 -26  -1 3.88479 2.83389   3
   3  26   1 7.02953 4.03524   1
  -4 -26  -1 7.81422 3.35217   3
   4  26   1 2.65820 3.67808   1
  -5 -26  -1 9.75603 3.54211   3
   5  26   1 2.10336 3.64516   1
  -4 -27   1 2.31929 3.00672   3
   4  27  -1 1.28956 3.55487   1
  -3 -27   1 8.37186 3.54529   3
   3  27  -1 3.38592 3.67910   1
  -2 -27   1 3.54484 3.22853   3
  -2  27   1 5.76867 3.54910   1
   2  27  -1 5.71959 3.56264   1
   1  27  -1 8.22477 3.85891   1
  -1  27   1 5.41987 3.62026   1
   0  27  -1 7.95502 3.90385   1
   0  27   1 10.1813  3.9331   1
  -1 -27  -1 10.5984  3.6441   3
   1  27   1 8.21845 3.92254   1
  -1  27  -1 10.6267  3.8280   1
  -2 -27  -1 2.41692 3.16683   3
  -2  27  -1 0.31726 3.67028   1
   2  27   1 4.66620 3.53479   1
  -3 -27  -1 6.56922 3.45548   3
   3  27   1 4.90107 4.01614   1
 -15   0   2 -2.1327  2.7372   3
 -14   0   2 26.1922  4.6312   3
 -13   0   2 -3.9050  2.5359   3
 -12   0   2 75.9721  6.8312   3
 -12   0   2 90.9435  6.6955   2
 -11   0   2 -3.4760  2.0752   2
 -11   0   2 -4.3296  2.1777   3
 -10   0   2 28.3041  3.4670   2
 -10   0   2 24.4922  3.6671   3
  -9   0   2 -1.4634  1.4691   3
  -9   0   2 -2.9025  1.4444   2
  -8   0   2 24.6838  3.2498   3
  -8   0   2 23.0013  2.8431   2
  -7   0   2 -2.2603  0.8907   2
  -7   0   2 -0.8088  1.1448   3
   7   0  -2 -0.6317  0.4694   1
  -6   0   2 1.65405 1.01794   3
   6   0  -2 0.51751 0.51790   1
  -6   0   2 0.32490 0.83230   2
  -5   0   2 -1.3343  0.6724   2
   5   0  -2 -0.7401  0.3725   1
  -5   0   2 -0.2350  0.7490   3
  -4   0   2 88.3385  4.6798   2
   4   0  -2 77.7887  3.9880   1
  -4   0   2 71.0120  4.2762   3
  -3   0   2 0.14961 0.20826   3
  -3   0   2 0.36913 0.47393   2
   3   0  -2 0.19905 0.33627   1
  -2   0   2 133.945   6.388   1
  -2   0   2 125.592   6.800   2
  -2   0   2 132.298   6.169   3
   2   0  -2 131.813   6.409   1
  -1   0   2 -12.420   0.381   2
  -1   0   2 -10.162   0.561   1
   0   0   2 2087.17   96.05   1
   1   0   2 -1.2090  0.3029   1
   2   0   2 2638.66  120.66   1
  -2   0  -2 2608.96  127.66   2
  -3   0  -2 -0.0540  0.4547   2
   4   0   2 443.154  20.811   1
  -4   0  -2 442.104  22.236   2
  -5   0  -2 -0.8716  0.6881   2
   5   0   2 -0.2714  0.4313   1
  -6   0  -2 1.92131 1.09886   2
  -7   0  -2 -2.9943  0.8783   2
  -8   0  -2 22.5257  2.8067   2
  -9   0  -2 -0.0720  1.6246   2
  -9   0  -2 -2.2805  1.7429   3
 -10   0  -2 67.8519  6.1912   3
 -10   0  -2 86.3865  5.9706   2
 -11   0  -2 -0.2262  2.3014   3
 -11   0  -2 -0.0421  2.1833   2
 -12   0  -2 46.3572  5.8438   3
 -13   0  -2 -3.5264  2.7307   3
 -14   0  -2 35.4134  5.7243   3
 -15  -1   2 0.01088 2.65973   3
 -15   1   2 -1.8604  2.4897   3
 -14  -1   2 -1.1032  2.9297   3
 -14   1   2 -1.6753  2.5673   3
 -13  -1   2 1.64565 2.54204   3
 -13   1   2 -4.2823  2.2702   3
 -13   1   2 -2.7711  2.2863   2
 -12  -1   2 37.4452  4.5892   2
 -12  -1   2 35.8415  4.9637   3
 -12   1   2 43.6843  4.9210   2
 -12   1   2 43.1792  5.3760   3
 -11  -1   2 -2.7276  1.9401   3
 -11  -1   2 -3.5604  1.9952   2
 -11   1   2 -3.5121  2.3564   2
 -11   1   2 -4.1199  1.9944   3
 -10  -1   2 69.6391  5.3439   2
 -10  -1   2 76.7160  5.7672   3
 -10   1   2 66.9649  5.5226   3
 -10   1   2 73.1530  5.5629   2
  -9  -1   2 18.3725  2.9766   3
  -9  -1   2 17.8485  2.7916   2
  -9   1   2 15.5677  2.7586   2
  -9   1   2 23.6384  3.3062   3
  -8  -1   2 262.751  14.352   2
  -8  -1   2 274.714  13.805   3
  -8   1   2 265.236  13.688   3
  -8   1   2 264.358  14.475   2
  -7  -1   2 0.23123 1.08820   2
  -7  -1   2 0.36773 1.15667   3
  -7   1   2 -0.5641  1.0643   2
  -6  -1   2 324.250  16.147   3
   6  -1  -2 338.212  15.663   1
  -6  -1   2 332.257  17.289   2
   6   1  -2 341.316  15.881   1
  -6   1   2 335.130  17.432   2
   5  -1  -2 9.39005 0.86092   1
  -5  -1   2 8.20099 1.42469   3
  -5  -1   2 7.57675 1.36082   2
   5   1  -2 8.96473 1.01880   1
  -5   1   2 5.98853 1.33305   2
  -4  -1   2 720.548  31.446   3
   4  -1  -2 700.662  32.029   1
  -4  -1   2 650.833  34.191   2
  -4   1   2 676.886  34.345   2
   4   1  -2 712.091  32.138   1
   3  -1  -2 93.1997  4.7251   1
  -3  -1   2 97.8896  5.1831   2
  -3   1   2 88.5744  5.2442   2
   3   1  -2 101.850   4.798   1
  -2  -1   2 517.209  26.003   2
  -2   1   2 539.805  26.108   2
  -1  -1   2 97.0939  4.5462   1
  -1  -1   2 74.5231  4.6936   2
   1   1  -2 100.312   4.584   1
  -1   1   2 89.8106  4.7209   2
  -1   1   2 76.9188  4.5044   1
   0  -1   2 63.8818  3.4763   1
   0  -1   2 64.4760  3.6980   2
   0   1  -2 70.8154  3.5246   1
   0   1   2 65.2634  3.5220   1
   1  -1   2 -0.0447  0.4724   1
   2  -1   2 1153.77   53.22   1
  -2  -1  -2 1157.33   56.28   2
   2   1   2 1155.84   53.31   1
  -2   1  -2 1141.67   56.46   2
  -3  -1  -2 326.722  16.052   2
   3  -1   2 322.732  15.062   1
  -3   1  -2 317.935  16.218   2
   3   1   2 310.549  15.169   1
  -4  -1  -2 355.096  17.131   2
   4  -1   2 333.358  15.939   1
   4   1   2 332.485  16.109   1
  -4   1  -2 332.913  17.266   2
  -5  -1  -2 21.2302  1.9838   2
   5  -1   2 23.2907  1.5193   1
   5   1   2 20.4585  1.6532   1
  -5   1  -2 19.8116  2.0642   2
  -6  -1  -2 434.840  21.435   3
  -6  -1  -2 446.101  22.592   2
   6  -1   2 440.324  20.868   1
   6   1   2 451.850  21.170   1
  -6   1  -2 452.025  22.804   2
  -7  -1  -2 33.6956  2.9258   2
  -7  -1  -2 35.9355  3.9243   3
  -7   1  -2 32.5610  3.0575   2
  -8  -1  -2 339.629  17.209   3
  -8  -1  -2 336.307  17.527   2
  -8   1  -2 323.348  17.648   2
  -9  -1  -2 9.93236 2.20723   2
  -9  -1  -2 9.94100 2.83826   3
  -9   1  -2 9.32262 2.29955   2
 -10  -1  -2 36.9312  4.1771   2
 -10  -1  -2 38.9411  4.8826   3
 -10   1  -2 44.2098  4.1724   2
 -10   1  -2 37.4942  4.6156   3
 -11  -1  -2 -1.1376  2.1918   3
 -11   1  -2 -0.1415  2.3485   3
 -11   1  -2 3.59503 2.29181   2
 -12  -1  -2 6.26974 2.98209   3
 -12   1  -2 2.71272 2.73265   3
 -13  -1  -2 -1.3483  2.7216   3
 -13   1  -2 -1.6607  2.6243   3
 -14  -1  -2 5.36278 3.33434   3
 -14   1  -2 2.89718 3.24340   3
 -15  -2   2 0.49338 2.73662   3
 -15   2   2 -3.2290  2.8186   3
 -14  -2   2 32.3836  4.9403   3
 -14   2   2 31.8060  5.1142   3
 -13  -2   2 1.44834 2.70445   3
 -13   2   2 2.81192 2.86266   2
 -13   2   2 1.36728 2.86322   3
 -12  -2   2 91.6550  7.0247   3
 -12   2   2 71.5452  6.6281   3
 -12   2   2 93.9745  7.0271   2
 -11  -2   2 27.4238  3.6378   2
 -11  -2   2 22.0307  3.9273   3
 -11   2   2 17.9757  3.8298   3
 -11   2   2 21.1035  3.6005   2
 -10  -2   2 51.3256  5.0628   3
 -10  -2   2 45.5283  4.1248   2
 -10   2   2 47.0665  4.4384   3
 -10   2   2 49.1504  4.5894   2
  -9  -2   2 6.40179 1.94085   2
  -9  -2   2 9.21431 2.44356   3
  -9   2   2 4.75049 2.11564   2
  -9   2   2 7.50898 2.08902   3
  -8  -2   2 48.5073  3.8833   2
  -8  -2   2 42.9978  4.4268   3
  -8   2   2 59.0413  4.4236   2
  -7  -2   2 -0.1664  1.2224   3
  -7  -2   2 -0.8903  1.0501   2
  -7   2   2 -0.8371  1.2035   2
   7   2  -2 -1.9890  0.6385   1
   6   2  -2 3.48143 0.94708   1
  -6   2   2 2.91650 1.22878   2
  -5  -2   2 289.868  15.457   2
  -5  -2   2 314.134  14.564   3
   5   2  -2 313.662  14.472   1
  -5   2   2 293.887  15.708   2
  -4  -2   2 28.8761  2.0395   2
  -4  -2   2 26.5021  2.0506   3
   4   2  -2 28.6015  1.8358   1
  -3  -2   2 113.264   6.131   2
  -3  -2   2 114.570   5.744   3
  -3   2   2 115.672   6.333   2
   3   2  -2 120.434   5.797   1
  -2  -2   2 827.375  40.946   3
  -2  -2   2 925.211  44.977   2
  -2   2   2 953.469  42.536   1
  -2   2   2 1015.73   45.16   2
   2   2  -2 878.617  42.549   1
  -1  -2   2 614.962  32.317   2
   1   2  -2 709.963  30.627   1
  -1   2   2 651.751  30.594   1
   0   2  -2 1701.60   81.21   1
   0   2   2 1823.80   81.30   1
  -1  -2  -2 238.203  11.458   3
   1  -2   2 249.608  11.800   1
  -1   2  -2 262.520  11.836   1
   1   2   2 243.421  11.926   1
   2  -2   2 2740.77  125.63   1
  -2  -2  -2 2827.07  132.88   2
  -2  -2  -2 2706.48  121.34   3
  -2   2  -2 2600.82  133.14   2
  -2   2  -2 2791.27  125.69   1
  -3  -2  -2 4.27847 0.68729   2
  -3  -2  -2 4.26341 0.95428   3
  -3   2  -2 3.02562 0.87690   2
   3   2   2 3.97803 0.75546   1
  -4  -2  -2 884.188  42.272   2
  -4  -2  -2 838.224  39.173   3
   4   2   2 854.375  40.082   1
  -4   2  -2 860.661  42.643   2
  -5  -2  -2 15.2333  2.1496   3
  -5  -2  -2 13.4346  1.5448   2
   5   2   2 13.0647  1.4534   1
  -5   2  -2 11.3159  1.7249   2
  -6  -2  -2 1.32443 1.37686   3
  -6  -2  -2 1.20006 0.93000   2
  -6   2  -2 1.93171 1.20507   2
   6   2   2 1.61881 0.80985   1
  -7  -2  -2 3.29372 1.92977   3
  -7  -2  -2 4.28483 1.36761   2
  -7   2  -2 3.21897 1.48905   2
   7   2   2 5.56851 1.23271   1
  -8  -2  -2 19.9057  2.4670   2
  -8  -2  -2 12.9976  3.1237   3
  -8   2  -2 20.3665  2.7611   2
  -9  -2  -2 2.26347 2.13927   3
  -9  -2  -2 0.23063 1.67241   2
  -9   2  -2 3.42275 1.77814   2
 -10  -2  -2 37.9490  4.9956   3
 -10   2  -2 42.9194  4.3309   2
 -11  -2  -2 -4.0527  2.2260   3
 -11   2  -2 -1.3286  2.1521   3
 -11   2  -2 -1.0296  2.0426   2
 -12  -2  -2 31.1331  4.9116   3
 -12   2  -2 38.4699  4.6755   2
 -12   2  -2 40.5659  5.4511   3
 -13  -2  -2 3.53036 3.30581   3
 -13   2  -2 1.51436 2.84068   3
 -14  -2  -2 36.5586  5.7149   3
 -14   2  -2 23.3299  5.0156   3
 -15  -3   2 -2.0051  2.6989   3
 -15   3   2 1.88365 3.22919   3
 -14  -3   2 0.82740 2.89394   3
 -14   3   2 1.01252 2.69410   2
 -14   3   2 -1.7027  2.7268   3
 -13  -3   2 -3.6158  2.4316   3
 -13   3   2 0.98392 2.57738   3
 -13   3   2 0.07068 2.45973   2
 -12  -3   2 30.7989  4.4265   3
 -12   3   2 14.4289  3.5031   2
 -12   3   2 24.1765  4.1103   3
 -11  -3   2 3.70152 2.66517   3
 -11   3   2 5.15922 2.88406   2
 -11   3   2 6.54617 2.72451   3
 -10  -3   2 88.0484  5.8834   2
 -10  -3   2 74.3575  6.0028   3
 -10   3   2 84.4669  6.4011   2
  -9  -3   2 42.2484  4.3763   3
  -9  -3   2 37.2573  3.3822   2
  -9   3   2 33.7411  3.9723   2
  -8  -3   2 396.220  18.928   3
  -8  -3   2 381.089  19.785   2
  -8   3   2 371.966  20.200   2
   8   3  -2 381.172  18.563   1
  -7  -3   2 3.13346 1.40793   3
  -7  -3   2 1.76655 1.23879   2
  -7   3   2 3.38439 1.56324   2
   7   3  -2 1.54015 0.97982   1
  -6  -3   2 721.192  38.282   2
  -6  -3   2 809.931  35.546   3
   6   3  -2 806.540  36.163   1
  -6   3   2 753.875  38.708   2
  -5  -3   2 323.598  16.924   2
  -5  -3   2 320.002  15.819   3
   5   3  -2 335.984  15.971   1
  -5   3   2 356.649  17.367   2
  -4  -3   2 527.449  26.508   2
  -4  -3   2 512.109  24.441   3
   4   3  -2 580.137  25.144   1
  -4   3   2 517.384  26.794   2
  -3  -3   2 123.450   6.610   2
  -3  -3   2 124.223   6.226   3
  -3   3   2 129.175   6.889   2
  -3   3   2 128.261   6.192   1
  -2  -3   2 5.28110 0.72664   2
  -2  -3   2 4.92654 0.68168   3
  -2   3   2 5.36093 0.88769   2
   2   3  -2 4.24131 0.73453   1
  -2   3   2 4.02151 0.67221   1
  -1  -3   2 86.9244  4.1759   3
  -1  -3   2 83.8367  4.6728   2
  -1   3   2 80.3126  4.4076   1
   1   3  -2 91.7765  4.4457   1
   0  -3   2 8.43271 0.88849   3
   0  -3  -2 8.49794 0.67910   3
   0   3   2 8.65356 0.98277   1
   0   3  -2 9.34170 0.84705   1
  -1  -3  -2 9.33144 0.94389   3
  -1   3  -2 8.80780 0.82140   1
   1   3   2 10.0590  1.0826   1
  -2  -3  -2 53.7103  3.1459   3
  -2   3  -2 57.2202  2.9133   1
   2   3   2 54.1850  3.1474   1
  -2   3  -2 55.6384  3.4559   2
  -3  -3  -2 13.7417  1.6442   3
  -3  -3  -2 15.3163  1.1486   2
  -3   3  -2 15.7170  1.0864   1
   3   3   2 15.0370  1.3636   1
  -3   3  -2 14.4439  1.7193   2
  -4  -3  -2 709.107  32.982   3
  -4  -3  -2 749.465  35.363   2
   4   3   2 707.356  33.714   1
  -4   3  -2 707.859  35.904   2
  -5  -3  -2 16.8083  2.2756   3
  -5  -3  -2 16.2984  1.6510   2
  -5   3  -2 19.4117  2.2368   2
   5   3   2 19.9264  1.9213   1
  -6  -3  -2 294.492  15.117   2
  -6  -3  -2 308.952  14.926   3
  -6   3  -2 297.121  15.657   2
   6   3   2 280.314  14.419   1
  -7  -3  -2 225.749  11.924   2
  -7  -3  -2 228.098  12.123   3
   7   3   2 225.969  11.401   1
  -7   3  -2 219.262  12.424   2
  -8  -3  -2 273.246  14.571   3
  -8  -3  -2 278.391  14.577   2
  -8   3  -2 269.762  15.017   2
  -9  -3  -2 82.3365  5.9899   2
  -9  -3  -2 85.0784  6.4967   3
  -9   3  -2 88.6752  6.2770   2
 -10  -3  -2 103.741   7.402   3
 -10   3  -2 88.3196  6.7029   2
 -11  -3  -2 14.0202  3.4227   3
 -11   3  -2 17.5348  3.2378   2
 -12  -3  -2 7.88318 3.26394   3
 -12   3  -2 11.5713  3.0898   2
 -12   3  -2 7.41050 3.13387   3
 -13  -3  -2 -1.8411  2.4865   3
 -13   3  -2 -2.0583  2.3233   3
 -14  -3  -2 -0.6734  3.1207   3
 -14   3  -2 5.32805 3.36877   3
 -15  -4   2 5.17187 3.24145   3
 -15   4   2 5.19856 3.21888   3
 -14  -4   2 29.2868  4.8196   3
 -14   4   2 25.7768  4.5215   2
 -14   4   2 34.3425  5.0286   3
 -13  -4   2 11.0599  3.5743   3
 -13   4   2 3.14134 2.92797   3
 -13   4   2 7.76406 3.22759   2
 -12  -4   2 63.4795  6.2233   3
 -12   4   2 54.5403  5.4595   2
 -12   4   2 49.4899  5.6449   3
 -11  -4   2 50.8679  5.2946   3
 -11   4   2 34.3516  4.7043   2
 -10  -4   2 105.395   6.902   3
 -10  -4   2 96.1547  6.4529   2
 -10   4   2 97.9079  7.1909   2
  -9  -4   2 5.08699 1.66853   2
  -9  -4   2 0.92291 1.95279   3
  -9   4   2 3.20244 2.07881   2
  -8  -4   2 13.5425  2.0840   2
  -8  -4   2 12.7682  2.4879   3
   8   4  -2 15.7459  1.9457   1
  -7  -4   2 12.4468  2.0967   3
  -7  -4   2 6.70780 1.52731   2
   7   4  -2 8.75218 1.46666   1
  -7   4   2 6.11076 1.93760   2
  -6  -4   2 106.823   6.035   3
  -6  -4   2 99.6746  5.9270   2
   6   4  -2 108.986   5.697   1
  -6   4   2 99.0624  6.3780   2
  -5  -4   2 206.652  10.495   3
  -5  -4   2 210.567  11.014   2
  -5   4   2 208.203  11.416   2
   5   4  -2 223.194  10.547   1
  -4  -4   2 181.490   9.508   2
  -4  -4   2 182.465   9.027   3
  -4   4   2 188.332   9.895   2
  -4   4   2 184.466   8.841   1
  -3  -4   2 699.315  33.117   3
  -3  -4   2 733.228  36.149   2
   3   4  -2 779.907  34.357   1
  -3   4   2 717.903  34.141   1
  -3   4   2 748.706  36.439   2
  -2  -4   2 834.793  41.024   2
  -2  -4   2 829.511  37.424   3
   2   4  -2 879.298  38.921   1
  -2   4   2 802.072  38.787   1
   1  -4  -2 252.028  11.370   3
  -1  -4   2 250.414  12.679   2
  -1  -4   2 252.707  11.489   3
   1   4  -2 244.068  11.948   1
  -1   4   2 244.673  11.977   1
   0  -4  -2 1514.63   68.51   3
   0  -4   2 1507.03   68.73   3
   0   4   2 1655.49   71.45   1
   0   4   2 1527.73   75.20   2
   0   4  -2 1527.05   71.29   1
  -1  -4  -2 1296.99   58.42   3
   1   4   2 1281.79   60.80   1
  -1   4  -2 1360.89   60.61   1
  -2  -4  -2 37.5157  2.3602   3
  -2   4  -2 36.4616  2.0988   1
  -2   4  -2 38.3928  2.6699   2
   2   4   2 37.8321  2.4218   1
  -3  -4  -2 33.0696  2.4147   3
  -3   4  -2 36.2243  1.9283   1
  -3   4  -2 30.9309  2.5636   2
  -4  -4  -2 517.146  24.600   2
  -4  -4  -2 489.479  23.249   3
   4   4   2 501.804  23.749   1
  -4   4  -2 482.972  25.302   2
  -5  -4  -2 24.9269  1.8944   2
  -5  -4  -2 22.6467  2.6301   3
  -5   4  -2 24.9389  2.5087   2
   5   4   2 24.8568  2.1238   1
  -6  -4  -2 19.8840  1.9528   2
  -6  -4  -2 17.9198  2.6566   3
   6   4   2 19.4146  2.1883   1
  -6   4  -2 17.1694  2.3957   2
  -7  -4  -2 1.56735 1.81912   3
  -7  -4  -2 4.83841 1.34469   2
  -7   4  -2 6.09473 1.78843   2
   7   4   2 3.51300 1.34007   1
  -8  -4  -2 26.8190  2.7686   2
  -8  -4  -2 24.9455  3.5624   3
  -8   4  -2 26.6223  3.3230   2
  -9  -4  -2 2.13729 2.36461   3
  -9   4  -2 3.49310 2.03721   2
 -10  -4  -2 39.8785  4.8927   3
 -10   4  -2 30.4879  4.1714   2
 -11  -4  -2 5.17069 2.99270   3
 -11   4  -2 7.57225 2.79920   2
 -12  -4  -2 41.7019  5.6600   3
 -12   4  -2 44.0223  5.2341   2
 -13  -4  -2 5.76679 3.49658   3
 -13   4  -2 15.6598  3.9620   3
 -13   4  -2 13.6798  3.6758   2
 -14  -4  -2 33.3537  5.3870   3
 -14   4  -2 25.3671  5.1563   3
 -15  -5   2 3.83011 3.31416   3
 -15   5   2 3.24715 2.97498   3
 -15   5   2 3.06032 3.14334   2
 -14  -5   2 1.97148 2.75942   3
 -14   5   2 -1.0054  2.7680   3
 -14   5   2 0.04566 2.83479   2
 -13  -5   2 -2.3359  2.4489   3
 -13   5   2 -3.6281  2.5042   2
 -13   5   2 1.40553 2.36075   3
 -12  -5   2 2.78300 2.70103   3
 -12   5   2 2.87239 2.78473   2
 -11  -5   2 25.0758  4.0723   3
 -11   5   2 29.9820  4.2722   2
 -10  -5   2 24.4346  3.6881   3
 -10   5   2 26.5992  3.7963   2
  -9  -5   2 54.5155  4.7097   3
  -9  -5   2 63.0936  4.3580   2
  -9   5   2 56.0518  4.9565   2
  -8  -5   2 155.284   8.917   3
  -8  -5   2 157.879   8.884   2
   8   5  -2 159.661   8.470   1
  -8   5   2 161.780   9.674   2
  -7  -5   2 189.401  10.217   2
  -7  -5   2 194.639  10.091   3
   7   5  -2 194.277   9.791   1
  -7   5   2 180.186  10.763   2
  -6  -5   2 346.424  16.831   3
  -6  -5   2 336.956  17.768   2
   6   5  -2 373.799  17.069   1
  -6   5   2 342.440  18.322   2
  -5  -5   2 861.828  41.506   2
  -5  -5   2 872.575  38.357   3
  -5   5   2 870.507  38.971   1
  -5   5   2 884.190  42.083   2
   5   5  -2 723.354  39.328   1
  -4  -5   2 720.883  31.769   3
  -4  -5   2 690.926  34.392   2
  -4   5   2 694.314  32.448   1
   4   5  -2 680.725  32.742   1
  -4   5   2 703.733  34.860   2
  -3  -5   2 7.74275 0.96491   2
  -3  -5   2 6.94354 1.02639   3
   3   5  -2 5.29577 0.95603   1
  -3   5   2 6.56815 1.13098   2
  -3   5   2 6.82697 0.90427   1
  -2  -5   2 138.374   6.762   3
  -2  -5   2 136.625   7.333   2
  -2   5   2 132.360   6.941   1
   2   5  -2 140.103   7.031   1
  -2   5   2 150.623   7.490   2
   1  -5  -2 236.073  10.521   3
  -1  -5   2 219.236  10.603   3
   1   5  -2 230.910  11.071   1
  -1   5   2 225.931  11.078   1
   0  -5  -2 0.81243 0.36702   3
   0  -5   2 1.13000 0.51469   3
   0   5   2 1.17205 0.55597   1
   0   5  -2 0.37439 0.46989   1
   0   5   2 1.57340 0.45498   2
  -1  -5  -2 14.2885  1.1699   3
   1   5   2 14.6754  1.3753   1
  -1   5  -2 14.3282  1.1706   1
  -2  -5  -2 119.620   5.961   3
  -2   5  -2 121.435   5.847   1
   2   5   2 119.203   6.210   1
  -2   5  -2 110.022   6.617   2
  -3  -5  -2 197.766  10.035   3
  -3   5  -2 215.076   9.830   1
  -3   5  -2 200.486  11.052   2
   3   5   2 207.441  10.326   1
  -4  -5  -2 173.082   8.844   3
  -4  -5  -2 180.309   8.736   2
  -4   5  -2 164.726   9.573   2
  -4   5  -2 170.050   8.214   1
  -5  -5  -2 55.9458  4.0267   3
  -5  -5  -2 63.8977  3.4850   2
  -5   5  -2 58.3737  4.2518   2
   5   5   2 55.5096  3.8015   1
  -6  -5  -2 382.467  19.223   3
  -6  -5  -2 404.217  19.908   2
   6   5   2 394.557  19.344   1
  -6   5  -2 398.464  20.765   2
  -7  -5  -2 415.818  19.908   3
  -7  -5  -2 405.079  20.350   2
  -7   5  -2 381.932  21.114   2
   7   5   2 402.514  19.722   1
  -8  -5  -2 67.0532  5.4137   3
  -8   5  -2 75.5170  5.5238   2
  -9  -5  -2 108.659   7.607   3
  -9   5  -2 103.766   7.360   2
 -10  -5  -2 100.224   7.391   3
 -10   5  -2 100.090   7.413   2
 -11  -5  -2 31.4520  4.6522   3
 -11   5  -2 22.5785  3.8909   2
 -12  -5  -2 11.5270  3.4485   3
 -12   5  -2 7.17191 3.15504   2
 -13  -5  -2 0.44068 2.89530   3
 -13   5  -2 4.49372 2.79630   3
 -13   5  -2 -1.8865  2.5299   2
 -14  -5  -2 1.11842 3.15585   3
 -14   5  -2 -0.6626  3.0426   3
 -15  -6   2 4.85738 3.32178   3
 -15   6   2 4.06208 3.22821   2
 -15   6   2 1.98489 3.04564   3
 -14  -6   2 6.98226 3.39668   3
 -14   6   2 5.44665 3.38337   2
 -14   6   2 7.65739 3.49343   3
 -13  -6   2 36.0331  5.0169   3
 -13   6   2 40.2114  5.0909   3
 -13   6   2 29.7161  4.9989   2
 -12  -6   2 34.4416  4.7583   3
 -12   6   2 33.9324  4.8862   2
 -11  -6   2 26.6355  3.9501   3
 -11   6   2 33.8976  4.5849   2
 -10  -6   2 60.3453  4.9847   3
 -10   6   2 55.9432  5.1732   2
  -9  -6   2 40.7117  4.1290   3
  -9   6   2 36.4899  4.2525   2
  -8  -6   2 3.18814 1.53298   3
  -8  -6   2 0.68787 1.19595   2
  -8   6   2 -0.7922  1.5782   2
   8   6  -2 1.05897 1.25553   1
  -7  -6   2 -1.7368  0.9846   2
  -7  -6   2 1.43597 1.25583   3
  -7   6   2 -2.0430  1.2245   2
   7   6  -2 1.18982 1.05373   1
  -6  -6   2 67.4112  4.4405   3
  -6  -6   2 70.0319  4.2076   2
  -6   6   2 66.9581  4.8410   2
   6   6  -2 70.9248  4.4011   1
  -5  -6   2 54.7324  3.3118   2
  -5  -6   2 54.1404  3.5426   3
  -5   6   2 57.7161  4.0798   2
   5   6  -2 41.3969  3.2221   1
  -5   6   2 57.0308  2.9910   1
  -4  -6   2 546.053  25.845   3
  -4  -6   2 547.146  27.900   2
  -4   6   2 565.853  26.392   1
   4   6  -2 578.698  26.737   1
  -4   6   2 580.808  28.447   2
  -3  -6   2 150.879   7.896   2
  -3  -6   2 148.094   7.445   3
   3   6  -2 154.806   7.734   1
  -3   6   2 151.729   7.518   1
  -3   6   2 144.886   8.172   2
  -2  -6   2 82.1163  4.5717   2
  -2  -6   2 75.3588  4.2204   3
  -2   6   2 76.1301  4.3408   1
   2   6  -2 82.5514  4.4790   1
  -2   6   2 88.7230  4.7344   2
   1  -6  -2 1649.14   72.64   3
  -1  -6   2 1561.20   72.73   3
  -1   6   2 1622.34   79.77   2
   1   6  -2 1599.27   75.56   1
  -1   6   2 1742.30   75.65   1
   0  -6   2 330.956  15.467   3
   0  -6  -2 333.740  15.231   3
   0   6   2 346.871  16.599   2
   0   6   2 325.768  16.054   1
   0   6  -2 331.018  15.925   1
  -1  -6  -2 468.688  20.991   3
  -1   6  -2 458.970  23.294   2
  -1   6  -2 471.100  21.743   1
   1   6   2 447.491  21.963   1
  -2  -6  -2 731.050  32.013   3
  -2   6  -2 676.602  35.281   2
  -2   6  -2 729.562  32.919   1
   2   6   2 689.588  33.279   1
  -3  -6  -2 410.028  19.714   3
   3   6   2 432.628  20.475   1
  -3   6  -2 416.910  21.772   2
  -3   6  -2 437.572  19.924   1
  -4  -6  -2 140.153   7.344   3
  -4   6  -2 137.160   8.021   2
  -4   6  -2 139.734   6.711   1
   4   6   2 133.824   7.383   1
  -5  -6  -2 68.4411  4.6267   3
  -5  -6  -2 73.0406  3.9571   2
  -5   6  -2 77.4568  5.1168   2
   5   6   2 69.2758  4.4563   1
  -5   6  -2 71.9031  3.6178   1
  -6  -6  -2 19.5726  1.7396   2
  -6  -6  -2 21.5864  2.7029   3
  -6   6  -2 22.8919  2.8824   2
   6   6   2 22.1415  2.5178   1
  -7  -6  -2 -0.5672  1.3889   3
  -7   6  -2 0.41531 1.48481   2
   7   6   2 0.25096 1.05615   1
  -8  -6  -2 29.9726  3.7508   3
   8   6   2 33.8159  3.2286   1
  -8   6  -2 32.1284  3.8457   2
  -9  -6  -2 5.52976 2.47689   3
  -9   6  -2 3.86908 2.26926   2
 -10  -6  -2 41.3197  5.0488   3
 -10   6  -2 46.2986  5.1201   2
 -11  -6  -2 34.0186  4.8510   3
 -11   6  -2 37.1521  4.8780   2
 -12  -6  -2 31.0830  4.7988   3
 -12   6  -2 19.8175  3.8934   2
 -13  -6  -2 24.0457  4.6931   3
 -13   6  -2 16.3716  4.0964   2
 -14  -6  -2 8.37987 3.88028   3
 -14   6  -2 8.49861 3.44415   3
 -14   6  -2 10.5137  3.8472   2
 -15  -7   2 -2.8583  2.8009   3
 -15   7   2 1.03718 3.19057   2
 -15   7   2 3.28420 2.99499   3
 -14  -7   2 -0.1557  2.6185   3
 -14   7   2 3.92407 3.32258   2
 -14   7   2 2.36504 2.94380   3
 -13  -7   2 0.64686 2.66757   3
 -13   7   2 -1.2624  2.4688   2
 -12  -7   2 3.22559 2.65673   3
 -12   7   2 0.62301 2.87589   2
 -11  -7   2 32.9921  4.3289   3
 -11   7   2 28.0400  4.2334   2
 -10  -7   2 7.56066 2.27944   3
 -10   7   2 1.55632 2.15519   2
  -9  -7   2 106.592   6.874   3
  -9   7   2 105.460   7.417   2
  -8  -7   2 83.3249  5.6347   3
   8   7  -2 86.6578  5.4126   1
  -8   7   2 85.4864  6.1144   2
  -7  -7   2 480.348  23.121   3
  -7  -7   2 481.013  24.451   2
   7   7  -2 502.821  23.627   1
  -7   7   2 478.427  25.268   2
  -6  -7   2 113.880   6.428   3
  -6  -7   2 113.637   6.267   2
  -6   7   2 108.126   5.643   1
  -6   7   2 117.708   7.092   2
  -5  -7   2 913.948  42.317   3
  -5  -7   2 893.843  45.789   2
  -5   7   2 945.582  43.276   1
  -5   7   2 957.436  46.545   2
   5   7  -2 948.126  43.791   1
  -4  -7   2 367.406  18.449   2
  -4  -7   2 363.681  17.249   3
   4   7  -2 371.993  17.842   1
  -4   7   2 365.629  18.965   2
  -4   7   2 365.539  17.486   1
  -3  -7   2 54.8163  3.3587   2
  -3  -7   2 52.8056  3.3004   3
  -3   7   2 54.2333  3.6651   2
   3   7  -2 59.4114  3.5239   1
  -3   7   2 55.4484  3.2656   1
  -2  -7   2 52.3605  3.1519   3
   2   7  -2 56.5347  3.3792   1
  -2   7   2 55.1975  3.2772   1
  -2   7   2 54.6480  3.4631   2
  -1  -7   2 17.5728  1.4734   3
   1  -7  -2 17.6566  1.4035   3
  -1   7   2 16.3391  1.5354   1
  -1   7   2 17.8522  1.5018   2
   1   7  -2 15.5830  1.5043   1
   0  -7  -2 47.3889  2.6672   3
   0  -7   2 45.2264  2.8695   3
   0   7  -2 46.3669  2.8917   1
   0   7   2 50.1559  2.8046   2
   0   7   2 44.7068  2.9754   1
  -1  -7  -2 17.4378  1.4597   3
  -1   7  -2 19.6444  1.5682   1
   1   7   2 19.7489  1.7320   1
   1   7   2 18.9445  1.2721   2
  -1   7  -2 18.1666  1.8815   2
  -2  -7  -2 6.98629 1.16500   3
  -2   7  -2 7.55203 1.04449   1
   2   7   2 7.90731 1.29487   1
  -2   7  -2 9.23684 1.59386   2
  -3  -7  -2 498.079  22.527   3
  -3   7  -2 502.379  22.838   1
  -3   7  -2 480.811  24.857   2
   3   7   2 462.320  23.319   1
  -4  -7  -2 213.439  10.619   3
  -4   7  -2 206.013  11.688   2
   4   7   2 208.872  10.898   1
  -4   7  -2 217.427  10.196   1
  -5  -7  -2 301.269  14.979   3
  -5   7  -2 315.154  16.481   2
  -5   7  -2 302.735  14.393   1
  -6  -7  -2 49.3123  3.7936   3
  -6   7  -2 45.9150  3.9617   2
   6   7   2 45.2211  3.5741   1
  -7  -7  -2 265.492  13.790   3
  -7   7  -2 264.735  14.804   2
   7   7   2 265.606  13.756   1
  -8  -7  -2 47.3819  4.3024   3
   8   7   2 43.5525  3.6831   1
  -8   7  -2 42.8209  4.2669   2
  -9  -7  -2 78.4235  5.9836   3
  -9   7  -2 65.7813  5.8999   2
 -10  -7  -2 71.5323  5.9678   3
 -10   7  -2 59.5336  5.7029   2
 -11  -7  -2 31.5237  4.7870   3
 -11   7  -2 27.5559  4.4179   2
 -12  -7  -2 -1.7943  2.5238   3
 -12   7  -2 1.94458 2.68576   2
 -13  -7  -2 2.20020 2.97830   3
 -13   7  -2 0.57802 2.89182   2
 -14  -7  -2 -2.0834  2.9165   3
 -14   7  -2 1.93792 3.31692   2
 -14  -8   2 -4.6603  2.5157   3
 -14   8   2 -1.2551  2.8449   2
 -13  -8   2 42.8365  5.3299   3
 -13   8   2 43.6341  5.7498   2
 -12  -8   2 15.0564  3.4862   3
 -12   8   2 7.07990 3.16396   2
 -11  -8   2 54.1779  5.4816   3
 -11   8   2 50.3763  5.7821   2
 -10  -8   2 28.8448  3.6842   3
 -10   8   2 23.1151  3.8762   2
  -9  -8   2 33.3571  3.8155   3
  -9   8   2 29.9331  4.0521   2
   9   8  -2 32.8771  3.5338   1
  -8  -8   2 1.75469 1.57157   3
  -8   8   2 2.10991 1.89913   2
   8   8  -2 0.93172 1.39954   1
  -7  -8   2 15.2508  2.4043   3
  -7  -8   2 16.3934  1.8742   2
  -7   8   2 14.4579  2.6233   2
  -6  -8   2 5.40443 1.58744   3
  -6  -8   2 5.91223 1.11499   2
   6   8  -2 4.40494 1.55440   1
  -6   8   2 4.61033 1.80717   2
  -6   8   2 5.83509 0.94511   1
  -5  -8   2 223.576  11.722   2
  -5  -8   2 211.085  11.244   3
   5   8  -2 238.019  11.683   1
  -5   8   2 238.141  12.543   2
  -5   8   2 225.452  11.125   1
  -4  -8   2 41.0345  3.0939   3
  -4  -8   2 46.8819  2.9881   2
  -4   8   2 47.1412  2.9561   1
  -4   8   2 47.3669  3.5477   2
   4   8  -2 43.7358  3.2297   1
  -3  -8   2 72.1128  4.2959   3
   3   8  -2 76.1135  4.5539   1
  -3   8   2 78.1280  4.3277   1
  -3   8   2 76.3389  4.7450   2
  -2  -8   2 392.158  17.893   3
   2   8  -2 388.871  18.613   1
  -2   8   2 379.518  18.507   1
  -2   8   2 380.197  19.543   2
  -1  -8   2 277.107  13.169   3
   1  -8  -2 284.981  13.075   3
   1   8  -2 279.947  13.691   1
  -1   8   2 264.102  13.676   1
  -1   8   2 288.750  14.275   2
   0  -8  -2 2.91397 0.74497   3
   0  -8   2 3.27698 0.91779   3
   0   8   2 2.41066 0.91955   1
   0   8   2 3.36198 0.77082   2
   0   8  -2 3.33538 0.94396   1
  -1  -8  -2 929.995  42.434   3
  -1   8  -2 948.902  44.056   1
   1   8   2 973.031  46.143   2
   1   8   2 926.724  44.326   1
  -1   8  -2 944.137  46.881   2
  -2  -8  -2 94.9116  5.0236   3
  -2   8  -2 92.8407  4.9678   1
   2   8   2 90.8296  5.3330   1
  -2   8  -2 91.1195  5.7131   2
  -3  -8  -2 417.477  19.517   3
  -3   8  -2 417.420  21.629   2
  -3   8  -2 422.486  19.766   1
   3   8   2 411.655  20.309   1
  -4  -8  -2 1.85349 1.01286   3
  -4   8  -2 5.07912 0.82753   1
  -4   8  -2 2.68450 1.25087   2
   4   8   2 2.17289 1.10166   1
  -5  -8  -2 2.96571 1.30374   3
  -5   8  -2 3.63588 0.76937   1
  -5   8  -2 2.19652 1.55313   2
   5   8   2 1.90602 1.21436   1
  -6  -8  -2 20.1495  2.6479   3
  -6   8  -2 19.9697  2.8732   2
  -7  -8  -2 1.24723 1.57359   3
   7   8   2 1.42001 1.31460   1
  -7   8  -2 2.36463 1.76105   2
  -8  -8  -2 0.73794 1.65098   3
  -8   8  -2 0.19033 2.01247   2
   8   8   2 1.37812 1.44528   1
  -9  -8  -2 33.1095  4.2412   3
  -9   8  -2 37.6782  4.4464   2
 -10  -8  -2 8.24213 2.80572   3
 -10   8  -2 3.67684 2.62168   2
 -11  -8  -2 48.0207  5.4996   3
 -11   8  -2 43.1493  5.4037   2
 -12  -8  -2 2.68195 2.80751   3
 -12   8  -2 1.61817 2.69706   2
 -13  -8  -2 26.6129  4.6160   3
 -13   8  -2 21.0683  4.3875   2
 -14  -8  -2 0.87464 3.22031   3
 -14   8  -2 0.77390 2.95936   2
 -14  -9   2 -0.5422  2.7116   3
 -14   9   2 -1.0487  3.1021   2
 -13  -9   2 -2.6554  2.0597   3
 -13   9   2 2.81243 3.07682   2
 -12  -9   2 2.31123 2.48666   3
 -12   9   2 6.01700 3.14529   2
 -11  -9   2 50.4340  5.2461   3
 -11   9   2 39.5222  5.0242   2
 -10  -9   2 5.23584 2.27328   3
 -10   9   2 5.94373 2.73662   2
  -9  -9   2 90.5480  6.1928   3
  -9   9   2 89.6920  6.8138   2
   9   9  -2 93.3717  6.0945   1
  -8  -9   2 42.3022  3.8348   3
  -8   9   2 42.6415  4.2018   2
   8   9  -2 43.5712  3.7281   1
  -7  -9   2 249.975  12.243   3
  -7   9   2 247.273  13.440   2
   7   9  -2 211.781  12.210   1
  -6  -9   2 21.3259  2.5299   3
  -6  -9   2 19.9503  1.8492   2
   6   9  -2 18.0048  2.3656   1
  -6   9   2 21.2386  1.7683   1
  -6   9   2 18.2429  2.6918   2
  -5  -9   2 437.007  21.771   2
  -5  -9   2 433.262  20.521   3
  -5   9   2 430.159  22.540   2
  -5   9   2 428.686  20.694   1
   5   9  -2 438.922  21.245   1
  -4  -9   2 0.40795 0.64619   2
  -4  -9   2 0.91796 0.94184   3
  -4   9   2 -1.2027  1.1078   2
   4   9  -2 -1.1193  0.8541   1
  -4   9   2 0.57631 0.81973   1
  -3  -9   2 219.347  10.855   3
  -3   9   2 227.237  11.104   1
   3   9  -2 213.687  11.269   1
  -3   9   2 223.808  11.885   2
  -2  -9   2 321.155  15.560   3
  -2   9   2 337.139  16.182   1
   2   9  -2 334.793  16.263   1
   1  -9  -2 99.2785  5.3040   3
  -1  -9   2 94.2590  5.3658   3
   1   9  -2 96.4215  5.5647   1
  -1   9   2 108.531   5.728   2
  -1   9   2 101.880   5.652   1
   0  -9  -2 112.343   5.829   3
   0  -9   2 114.453   6.090   3
   0   9   2 104.023   6.268   1
   0   9  -2 113.088   6.195   1
   0   9   2 122.031   6.216   2
  -1  -9  -2 239.587  11.706   3
  -1   9  -2 242.048  12.143   1
   1   9   2 242.575  12.437   1
   1   9   2 253.069  12.379   2
  -1   9  -2 251.737  13.154   2
  -2  -9  -2 4.27505 1.10885   3
  -2   9  -2 5.32767 1.42163   2
  -2   9  -2 3.90009 1.02652   1
   2   9   2 4.24305 1.19036   1
  -3  -9  -2 96.6168  5.3348   3
   3   9   2 84.8996  5.4961   1
  -3   9  -2 94.3786  5.9985   2
  -3   9  -2 97.6228  5.0712   1
  -4  -9  -2 72.6552  4.8417   3
  -4   9  -2 83.6709  5.6336   2
   4   9   2 81.2644  5.1515   1
  -4   9  -2 89.4785  4.5400   1
  -5  -9  -2 556.980  26.733   3
   5   9   2 591.842  27.811   1
  -5   9  -2 563.054  29.492   2
  -5   9  -2 574.318  26.784   1
  -6  -9  -2 19.3948  2.6173   3
   6   9   2 21.4909  2.7652   1
  -6   9  -2 24.3151  3.2671   2
  -7  -9  -2 272.934  13.231   3
  -7   9  -2 255.688  14.300   2
   7   9   2 223.868  13.085   1
  -8  -9  -2 17.2902  2.8365   3
   8   9   2 13.2765  2.5069   1
  -8   9  -2 10.6242  2.8979   2
  -9  -9  -2 101.449   7.233   3
  -9   9  -2 109.217   7.746   2
 -10  -9  -2 12.6440  3.1786   3
 -10   9  -2 11.0938  3.2665   2
 -11  -9  -2 12.0549  3.3538   3
 -11   9  -2 13.3910  3.6288   2
 -12  -9  -2 1.33481 2.43788   3
 -12   9  -2 0.36673 2.65240   2
 -13  -9  -2 0.59563 3.00608   3
 -13   9  -2 0.63475 2.92432   2
 -14  -9  -2 -0.0743  3.1723   3
 -14   9  -2 -2.3974  3.2259   2
 -14 -10   2 0.99998 2.79321   3
 -14  10   2 4.17830 3.55802   2
 -13 -10   2 30.5502  4.7327   3
 -13  10   2 30.7536  5.0611   2
 -12 -10   2 0.79101 2.30913   3
 -12  10   2 -4.0689  2.4743   2
 -11 -10   2 38.6490  4.8031   3
 -11  10   2 43.2646  5.2414   2
 -10 -10   2 12.2885  2.8253   3
 -10  10   2 6.26942 2.93872   2
  -9 -10   2 62.0499  4.8488   3
   9  10  -2 59.3298  4.6872   1
  -9  10   2 50.2157  5.1468   2
  -8 -10   2 9.59785 2.19303   3
  -8  10   2 3.82187 2.30512   2
   8  10  -2 1.38283 0.99214   1
  -7 -10   2 6.15365 1.88384   3
  -7  10   2 12.1528  2.4997   2
   7  10  -2 11.6075  2.0562   1
  -6 -10   2 -0.8534  1.0556   3
   6  10  -2 -0.5367  1.1272   1
  -6  10   2 -0.7889  1.6234   2
  -5 -10   2 17.3349  2.3192   3
  -5 -10   2 18.7800  1.7971   2
  -5  10   2 23.4440  1.9532   1
  -5  10   2 21.7391  2.8421   2
   5  10  -2 20.8000  2.4856   1
  -4 -10   2 17.2785  2.1495   3
  -4  10   2 16.9525  2.3822   2
  -4  10   2 16.5830  1.9087   1
   4  10  -2 16.1579  2.2329   1
  -3 -10   2 254.569  12.380   3
   3  10  -2 238.608  12.802   1
  -3  10   2 258.209  12.689   1
  -3  10   2 262.756  13.558   2
  -2 -10   2 171.259   8.876   3
   2  10  -2 177.745   9.324   1
  -2  10   2 181.642   9.257   1
   1 -10  -2 655.602  29.600   3
  -1 -10   2 648.571  29.726   3
  -1  10   2 658.383  32.328   2
   1  10  -2 645.959  30.860   1
  -1  10   2 636.727  30.856   1
   0 -10   2 -1.6294  0.8528   3
   0 -10  -2 1.71433 0.86063   3
   0  10  -2 0.36739 0.81386   2
   0  10   2 -0.8753  0.7951   2
   0  10   2 -0.1367  1.0298   1
   0  10  -2 1.17924 1.00626   1
  -1 -10  -2 715.938  32.022   3
  -1  10  -2 719.452  35.441   2
   1  10   2 678.953  33.493   1
   1  10   2 721.071  34.616   2
  -1  10  -2 682.423  33.207   1
  -2 -10  -2 47.4519  3.2595   3
   2  10   2 50.6000  3.6674   1
  -2  10  -2 50.0192  3.2340   1
  -2  10  -2 54.8926  3.9278   2
  -3 -10  -2 432.151  20.394   3
  -3  10  -2 434.127  22.640   2
   3  10   2 434.884  21.378   1
  -3  10  -2 436.513  20.766   1
  -4 -10  -2 2.53999 1.19244   3
   4  10   2 2.19849 1.35539   1
  -4  10  -2 1.12268 1.50351   2
  -4  10  -2 2.17004 0.99346   1
  -5 -10  -2 43.4510  3.5472   3
  -5  10  -2 47.5521  2.9198   1
  -5  10  -2 48.1257  4.1317   2
   5  10   2 41.8640  3.6565   1
  -6 -10  -2 6.06700 1.87082   3
  -6  10  -2 5.93105 1.99916   2
   6  10   2 4.42071 1.72242   1
  -7 -10  -2 1.16150 1.54882   3
  -7  10  -2 0.75737 1.79464   2
   7  10   2 0.23424 1.31370   1
  -8 -10  -2 1.11152 1.89786   3
   8  10   2 -0.6761  1.5493   1
  -8  10  -2 -2.3923  1.8768   2
  -9 -10  -2 27.6901  3.8092   3
  -9  10  -2 26.3520  4.0550   2
 -10 -10  -2 1.81287 2.27470   3
 -10  10  -2 -0.1554  2.2873   2
 -11 -10  -2 43.4948  5.2616   3
 -11  10  -2 45.1736  5.6945   2
 -12 -10  -2 -1.9258  2.4210   3
 -12  10  -2 -1.2632  2.8671   2
 -13 -10  -2 23.0154  4.7252   3
 -13  10  -2 28.8874  5.1729   2
 -14 -11   2 1.49779 2.91180   3
 -14  11   2 -1.3090  3.1902   2
 -13 -11   2 0.36252 2.58176   3
 -13  11   2 5.18535 3.26230   2
 -12 -11   2 -1.8299  2.1883   3
 -12  11   2 -0.4813  2.9185   2
 -11 -11   2 51.7679  5.4296   3
 -11  11   2 47.7321  5.7728   2
 -10 -11   2 2.10387 2.32266   3
 -10  11   2 1.01950 2.72133   2
  -9 -11   2 84.2372  6.0020   3
  -9  11   2 82.0555  6.7173   2
  -8 -11   2 1.77169 1.60333   3
  -8  11   2 -0.7073  1.8517   2
   8  11  -2 0.11680 1.62520   1
  -7 -11   2 115.293   6.887   3
  -7  11   2 104.249   7.447   2
   7  11  -2 121.227   7.139   1
  -6 -11   2 2.63482 1.42197   3
   6  11  -2 3.22844 1.43237   1
  -6  11   2 2.88380 1.70417   2
  -5 -11   2 206.378  10.529   3
   5  11  -2 203.469  10.883   1
  -5  11   2 202.143  10.382   1
  -5  11   2 201.235  11.535   2
  -4 -11   2 14.8030  2.0698   3
  -4  11   2 15.9233  2.3707   2
  -4  11   2 14.3978  1.9298   1
   4  11  -2 17.7699  2.3364   1
  -3 -11   2 126.118   7.114   3
  -3  11   2 142.752   7.868   2
   3  11  -2 134.015   7.536   1
  -3  11   2 131.219   7.284   1
  -2 -11   2 45.3067  3.2644   3
  -2  11   2 47.2682  3.4476   1
   2  11  -2 46.4455  3.4841   1
  -1 -11   2 68.5853  4.3152   3
   1 -11  -2 71.0349  4.1451   3
   1  11  -2 63.4118  4.5248   2
   1  11  -2 68.5304  4.4170   1
  -1  11   2 70.5742  4.4693   1
  -1  11   2 75.1375  4.4518   2
   0 -11   2 -1.1798  0.8053   3
   0 -11  -2 0.35346 0.79455   3
   0  11   2 -1.6335  1.1265   1
   0  11   2 -1.6684  0.8487   2
   0  11  -2 0.30826 0.96556   2
   0  11  -2 -1.1690  0.8868   1
  -1 -11  -2 20.2839  2.1210   3
   1  11   2 24.6915  2.6868   1
   1  11   2 24.8166  1.8494   2
  -1  11  -2 22.2366  2.1306   1
  -1  11  -2 26.5838  2.6013   2
  -2 -11  -2 9.70908 1.59744   3
   2  11   2 11.3067  2.0071   1
   2  11   2 9.14111 1.02960   2
  -2  11  -2 10.7262  1.6211   1
  -2  11  -2 6.27535 1.72076   2
  -3 -11  -2 498.664  23.269   3
  -3  11  -2 496.457  23.761   1
  -3  11  -2 511.718  25.872   2
   3  11   2 483.505  24.352   1
  -4 -11  -2 -1.1751  1.1313   3
  -4  11  -2 -0.1756  1.4206   2
  -4  11  -2 0.20170 0.95832   1
   4  11   2 -0.4495  1.1942   1
  -5 -11  -2 221.519  12.063   3
  -5  11  -2 243.609  13.625   2
   5  11   2 241.829  12.765   1
  -5  11  -2 244.644  11.775   1
  -6 -11  -2 2.13952 1.57975   3
  -6  11  -2 1.20512 1.87621   2
   6  11   2 1.57090 1.52622   1
  -7 -11  -2 225.881  12.186   3
   7  11   2 234.908  12.631   1
  -7  11  -2 224.408  13.443   2
  -8 -11  -2 1.49753 1.95871   3
  -8  11  -2 -3.3841  1.9837   2
   8  11   2 1.25260 0.81090   1
  -9 -11  -2 101.689   7.143   3
   9  11   2 101.696   7.418   1
  -9  11  -2 95.6390  7.5839   2
 -10 -11  -2 4.65452 2.37016   3
 -10  11  -2 5.20913 2.78448   2
 -11 -11  -2 8.30568 2.78873   3
 -11  11  -2 8.76794 3.32414   2
 -12 -11  -2 0.28133 2.49974   3
 -12  11  -2 2.28701 3.01985   2
 -13 -11  -2 -2.4254  2.7616   3
 -13  11  -2 3.54621 3.59665   2
 -14 -12   2 -4.4025  2.6553   3
 -14  12   2 -2.6455  3.1128   2
 -13 -12   2 32.5110  4.8462   3
 -13  12   2 25.6234  4.9532   2
 -12 -12   2 1.56795 2.52382   3
 -12  12   2 -0.5775  2.8369   2
 -11 -12   2 37.9101  4.6620   3
 -11  12   2 34.9201  5.1736   2
 -10 -12   2 7.43377 2.67866   3
 -10  12   2 6.48233 3.10783   2
  -9 -12   2 35.6388  4.1011   3
   9  12  -2 35.8342  4.2249   1
  -9  12   2 31.5131  4.4553   2
  -8 -12   2 12.0726  2.5400   3
  -8  12   2 8.66381 2.84968   2
   8  12  -2 18.3479  2.9434   1
  -7 -12   2 1.72472 1.50604   3
  -7  12   2 1.47133 1.79325   2
   7  12  -2 0.42312 1.58008   1
  -6 -12   2 3.31513 1.45877   3
   6  12  -2 3.89217 1.84686   1
  -6  12   2 3.80242 1.89872   2
  -5 -12   2 15.8256  2.3009   3
  -5  12   2 17.5411  2.1216   1
  -5  12   2 14.3981  2.4977   2
   5  12  -2 15.0418  2.4631   1
  -4 -12   2 5.01881 1.44368   3
  -4  12   2 2.28619 1.32038   1
   4  12  -2 3.63087 1.65191   1
  -4  12   2 2.45358 1.73372   2
  -3 -12   2 253.757  12.837   3
  -3  12   2 272.076  14.061   2
  -3  12   2 263.762  13.217   1
   3  12  -2 250.051  13.402   1
  -2 -12   2 1.85573 1.08951   3
  -2  12   2 1.01992 1.18366   1
   2  12  -2 1.82109 1.32918   1
  -2  12   2 1.54872 0.95416   2
  -1 -12   2 517.590  24.268   3
   1 -12  -2 520.155  24.129   3
   1  12  -2 519.143  26.391   2
  -1  12   2 532.457  26.254   2
   1  12  -2 504.425  25.170   1
  -1  12   2 526.743  25.220   1
   0 -12  -2 33.2164  2.6694   3
   0 -12   2 26.3472  2.9006   3
   0  12   2 35.4881  2.9499   1
   0  12   2 36.0076  2.6216   2
   0  12  -2 37.6197  2.9525   1
   0  12  -2 39.3122  3.1006   2
  -1 -12  -2 409.095  19.424   3
   1  12   2 429.440  20.566   1
  -1  12  -2 423.131  20.241   1
  -1  12  -2 384.198  21.432   2
   1  12   2 424.109  20.737   2
  -2 -12  -2 4.40040 1.31757   3
  -2  12  -2 3.00786 1.18462   1
  -2  12  -2 3.90762 1.64162   2
   2  12   2 5.10636 1.61496   1
  -3 -12  -2 249.030  12.305   3
  -3  12  -2 242.306  12.335   1
   3  12   2 230.903  12.906   1
  -3  12  -2 261.212  13.828   2
  -4 -12  -2 18.0066  2.3824   3
   4  12   2 12.5159  2.3579   1
  -4  12  -2 12.9872  1.9286   1
  -4  12  -2 18.4780  2.8389   2
  -5 -12  -2 55.0074  4.2465   3
   5  12   2 60.6255  4.5812   1
  -5  12  -2 58.6557  5.0228   2
  -6 -12  -2 13.5378  2.4960   3
   6  12   2 15.9376  2.7455   1
  -6  12  -2 11.9194  2.7192   2
  -7 -12  -2 0.51824 1.75549   3
  -7  12  -2 -0.6467  2.3049   2
   7  12   2 -0.4206  1.7113   1
  -8 -12  -2 6.16492 2.30001   3
  -8  12  -2 0.42803 2.49646   2
   8  12   2 2.96867 2.14667   1
  -9 -12  -2 27.9749  3.9193   3
  -9  12  -2 30.2055  4.4595   2
   9  12   2 30.0781  4.0876   1
 -10 -12  -2 0.47033 2.34185   3
 -10  12  -2 -1.0128  2.5759   2
 -11 -12  -2 34.4379  4.7372   3
 -11  12  -2 44.8741  5.7818   2
 -12 -12  -2 -4.4509  2.3464   3
 -12  12  -2 -3.6058  2.8930   2
 -13 -12  -2 16.1531  4.0981   3
 -13  12  -2 17.4257  4.6047   2
 -13 -13   2 -1.8689  2.4890   3
 -13  13   2 -2.3397  2.8060   2
 -12 -13   2 0.44723 2.41969   3
 -12  13   2 2.91024 3.27199   2
 -11 -13   2 22.3967  3.8297   3
 -11  13   2 23.5825  4.4082   2
 -10 -13   2 15.8781  3.2565   3
 -10  13   2 14.9443  3.6721   2
  -9 -13   2 77.5926  5.9142   3
   9  13  -2 86.0876  6.2384   1
  -9  13   2 75.7931  6.5862   2
  -8 -13   2 0.47547 1.67681   3
   8  13  -2 -0.5809  1.8332   1
  -8  13   2 -2.0280  1.9336   2
  -7 -13   2 90.2452  5.9146   3
  -7  13   2 85.5214  6.4489   2
   7  13  -2 83.2371  6.1788   1
  -6 -13   2 24.3380  2.9424   3
   6  13  -2 24.4549  3.1856   1
  -6  13   2 21.0560  3.3007   2
  -5 -13   2 179.883  10.239   3
   5  13  -2 199.505  10.809   1
  -5  13   2 200.662  10.287   1
  -5  13   2 195.900  11.321   2
  -4 -13   2 47.4673  3.6775   3
  -4  13   2 48.7350  3.6586   1
  -4  13   2 50.0344  4.2176   2
   4  13  -2 44.5880  3.9402   1
  -3 -13   2 163.832   8.672   3
   3  13  -2 149.098   8.928   1
  -3  13   2 161.109   9.375   2
  -3  13   2 175.535   8.995   1
  -2 -13   2 60.8871  4.1781   3
  -2  13   2 58.9417  4.3554   2
   2  13  -2 61.3651  4.4700   1
  -2  13   2 64.0627  4.3966   1
   2  13  -2 64.3389  4.2492   2
   1 -13  -2 23.4409  2.4401   3
  -1 -13   2 20.6490  2.4506   3
   1  13  -2 21.9699  2.5277   2
  -1  13   2 26.0886  2.7721   1
   1  13  -2 20.8100  2.6461   1
  -1  13   2 24.8020  2.3106   2
   0 -13  -2 4.70262 1.25795   3
   0 -13   2 2.64075 1.34923   3
   0  13   2 2.50273 1.50860   1
   0  13  -2 2.49517 1.41269   1
   0  13   2 3.53269 1.16439   2
   0  13  -2 4.74696 1.59088   2
  -1 -13  -2 33.5292  2.6555   3
  -1  13  -2 22.6716  2.9715   2
   1  13   2 30.1080  2.3076   2
  -1  13  -2 29.0932  2.8265   1
   1  13   2 32.0284  3.0512   1
  -2 -13  -2 18.0093  2.3112   3
  -2  13  -2 13.6830  2.4466   2
   2  13   2 11.7280  2.3567   1
  -2  13  -2 19.0117  2.2998   1
  -3 -13  -2 183.838   9.642   3
  -3  13  -2 193.906  10.950   2
   3  13   2 168.659  10.121   1
  -3  13  -2 189.993   9.710   1
  -4 -13  -2 -0.1690  1.2060   3
  -4  13  -2 -1.5271  1.5765   2
  -4  13  -2 -1.1760  1.0856   1
   4  13   2 1.13874 1.69103   1
  -5 -13  -2 184.724  10.068   3
  -5  13  -2 190.219  11.338   2
   5  13   2 186.680  10.709   1
  -6 -13  -2 29.4847  3.4560   3
  -6  13  -2 24.6177  3.9570   2
   6  13   2 31.0545  3.6972   1
  -7 -13  -2 111.687   7.324   3
   7  13   2 120.307   7.922   1
  -7  13  -2 122.126   8.469   2
  -8 -13  -2 43.9387  4.6509   3
   8  13   2 47.5179  5.1059   1
  -8  13  -2 41.9883  5.2952   2
  -9 -13  -2 19.3392  3.3775   3
   9  13   2 14.5943  3.0215   1
  -9  13  -2 16.1105  3.4992   2
 -10 -13  -2 2.47732 2.35036   3
 -10  13  -2 7.43590 3.08914   2
 -11 -13  -2 7.76868 3.01471   3
 -11  13  -2 4.08319 3.14659   2
 -12 -13  -2 2.68352 2.97700   3
 -12  13  -2 -0.0569  3.3214   2
 -13 -13  -2 0.67697 3.19154   3
 -13  13  -2 4.11126 3.38406   2
 -13 -14   2 17.0878  3.8322   3
 -13  14   2 15.3428  4.6054   2
 -12 -14   2 6.22717 2.88791   3
 -12  14   2 6.56579 3.49646   2
 -11 -14   2 15.8993  3.3538   3
 -11  14   2 10.9826  3.5996   2
 -10 -14   2 16.0634  3.3298   3
 -10  14   2 14.2443  3.7879   2
  10  14  -2 18.1056  3.4579   1
  -9 -14   2 26.7875  3.6817   3
  -9  14   2 14.4136  3.4095   2
   9  14  -2 27.8315  3.8779   1
  -8 -14   2 6.95053 2.33116   3
   8  14  -2 4.33351 2.30683   1
  -8  14   2 1.55557 2.43422   2
  -7 -14   2 1.88668 1.70742   3
   7  14  -2 1.65868 1.97893   1
  -7  14   2 3.90867 2.25569   2
  -6 -14   2 7.03253 1.94631   3
  -6  14   2 8.73910 2.56455   2
   6  14  -2 4.24818 2.16610   1
  -5 -14   2 2.32471 1.44851   3
   5  14  -2 0.84846 1.65605   1
  -5  14   2 -0.6182  1.3800   1
  -5  14   2 -2.8594  1.6549   2
  -4 -14   2 64.8234  4.5073   3
   4  14  -2 70.2175  4.9087   1
  -4  14   2 60.2286  4.8468   2
  -4  14   2 52.0197  4.3215   1
  -3 -14   2 164.282   8.955   3
  -3  14   2 173.241   9.268   1
  -3  14   2 162.779   9.642   2
   3  14  -2 161.970   9.369   1
  -2 -14   2 40.4163  3.4658   3
   2  14  -2 43.5822  3.8167   1
  -2  14   2 50.3536  3.8155   2
  -2  14   2 48.1182  3.8721   1
   2  14  -2 49.2912  3.5578   2
   1 -14  -2 204.802  10.199   3
  -1 -14   2 192.594  10.258   3
   1  14  -2 183.132  10.578   1
   1  14  -2 207.443  11.028   2
  -1  14   2 200.447  10.702   1
  -1  14   2 195.555  10.744   2
   0 -14   2 33.1797  3.2580   3
   0 -14  -2 40.8129  3.1455   3
   0  14   2 37.9482  3.4738   1
   0  14   2 40.7361  3.0911   2
   0  14  -2 44.4369  3.5526   2
   0  14  -2 40.8158  3.4459   1
  -1 -14  -2 290.778  13.949   3
  -1  14  -2 276.906  14.418   1
   1  14   2 281.674  14.744   1
  -2 -14  -2 16.3511  2.2306   3
  -2  14  -2 15.3282  2.2774   1
   2  14   2 14.5380  2.5420   1
  -2  14  -2 16.3282  2.7137   2
  -3 -14  -2 97.5212  5.8506   3
   3  14   2 92.4202  6.3378   1
  -3  14  -2 92.6199  5.7429   1
  -3  14  -2 100.747   6.673   2
  -4 -14  -2 12.4397  2.3630   3
  -4  14  -2 19.6466  2.4726   1
   4  14   2 15.9469  2.7712   1
  -4  14  -2 23.4660  3.4379   2
  -5 -14  -2 46.9174  4.0368   3
  -5  14  -2 44.1259  4.5131   2
   5  14   2 46.7344  4.3953   1
  -6 -14  -2 15.1226  2.7980   3
  -6  14  -2 12.5842  3.0368   2
   6  14   2 19.2320  3.2817   1
  -7 -14  -2 7.13368 2.26954   3
   7  14   2 4.83961 2.29760   1
  -7  14  -2 3.64402 2.68909   2
  -8 -14  -2 12.9650  2.9269   3
  -8  14  -2 6.46571 3.05493   2
   8  14   2 15.4340  3.2468   1
  -9 -14  -2 3.91590 2.53071   3
  -9  14  -2 7.28317 2.87039   2
   9  14   2 9.23475 2.91073   1
 -10 -14  -2 9.47372 3.00889   3
 -10  14  -2 6.84589 3.18027   2
 -11 -14  -2 31.5517  4.6463   3
 -11  14  -2 20.2234  4.5412   2
 -12 -14  -2 13.2543  3.6463   3
 -12  14  -2 4.82411 3.82749   2
 -13 -15   2 0.31989 2.77530   3
 -13  15   2 -3.4354  2.9412   2
 -12 -15   2 -1.4891  2.4246   3
 -12  15   2 -2.0487  2.6541   2
 -11 -15   2 1.65727 2.41119   3
 -11  15   2 6.17770 3.30172   2
 -10 -15   2 10.1120  2.9352   3
  10  15  -2 10.7024  3.0958   1
 -10  15   2 9.77277 3.72157   2
  -9 -15   2 61.8456  5.3324   3
   9  15  -2 66.5584  5.9001   1
  -9  15   2 57.8246  5.8478   2
  -8 -15   2 14.4988  2.9540   3
  -8  15   2 10.0521  3.3944   2
   8  15  -2 15.3780  3.1742   1
  -7 -15   2 78.3644  5.5494   3
   7  15  -2 67.3966  5.7177   1
  -7  15   2 70.7363  6.2188   2
  -6 -15   2 13.8078  2.5931   3
   6  15  -2 19.4182  3.2824   1
  -6  15   2 15.8684  3.2258   2
  -5 -15   2 43.4575  3.7720   3
   5  15  -2 47.0824  4.2424   1
  -5  15   2 36.7852  3.5237   1
  -5  15   2 39.8705  4.4363   2
  -4 -15   2 74.1919  5.1364   3
  -4  15   2 75.0667  5.1974   1
   4  15  -2 70.9546  5.2790   1
  -4  15   2 71.0996  5.6138   2
  -3 -15   2 14.5207  2.3780   3
  -3  15   2 17.3509  2.7663   2
  -3  15   2 19.6263  2.8079   1
   3  15  -2 14.0547  2.5028   1
  -2 -15   2 52.9807  3.9059   3
   2  15  -2 45.6110  3.7891   2
  -2  15   2 51.7406  4.0780   1
   2  15  -2 45.2584  3.9793   1
  -2  15   2 43.0650  3.8351   2
   1 -15  -2 7.08922 1.70665   3
  -1  15   2 8.48099 1.83146   2
   1  15  -2 9.35963 2.10268   1
  -1  15   2 9.65922 2.12388   1
   1  15  -2 8.24099 1.79264   2
   0 -15  -2 3.32613 1.46195   3
   0 -15   2 6.92426 1.78768   3
   0  15  -2 4.33411 1.89905   1
   0  15   2 5.93724 1.93140   1
   0  15  -2 8.18551 1.93829   2
   0  15   2 4.89737 1.51542   2
  -1 -15  -2 19.9195  2.4546   3
  -1  15  -2 20.0142  2.7183   1
   1  15   2 23.1044  2.9992   1
  -2 -15  -2 22.1322  2.5760   3
  -2  15  -2 22.9528  2.7560   1
  -2  15  -2 18.4081  2.9715   2
   2  15   2 14.4018  2.7743   1
  -3 -15  -2 26.6996  3.0947   3
   3  15   2 26.6703  3.4459   1
  -3  15  -2 35.1669  3.9464   2
  -3  15  -2 29.8801  3.1420   1
  -4 -15  -2 17.5353  2.7450   3
   4  15   2 15.7960  3.0436   1
  -4  15  -2 16.7815  2.5016   1
  -4  15  -2 18.0071  3.2961   2
  -5 -15  -2 227.444  12.034   3
  -5  15  -2 223.079  13.412   2
   5  15   2 229.913  12.853   1
  -6 -15  -2 25.3705  3.4198   3
   6  15   2 30.6690  4.0448   1
  -6  15  -2 28.2872  4.3405   2
  -7 -15  -2 60.8368  5.1196   3
   7  15   2 67.1890  5.9480   1
  -7  15  -2 63.2990  6.0028   2
  -8 -15  -2 57.1172  4.8870   3
  -8  15  -2 44.6598  5.5361   2
   8  15   2 49.5949  5.6730   1
  -9 -15  -2 11.6018  2.8820   3
  -9  15  -2 14.6694  3.6113   2
   9  15   2 13.0080  3.2222   1
 -10 -15  -2 6.19375 2.94627   3
 -10  15  -2 9.49107 3.62471   2
 -11 -15  -2 6.79087 3.03962   3
 -11  15  -2 4.55474 3.53884   2
 -12 -15  -2 -1.4555  2.9551   3
 -12  15  -2 -0.2355  3.1486   2
 -12 -16   2 5.72684 3.06083   3
 -12  16   2 3.33294 3.30766   2
 -11 -16   2 6.27724 2.80522   3
 -11  16   2 1.14845 3.20115   2
 -10 -16   2 11.0638  3.1806   3
 -10  16   2 7.10627 3.62085   2
  10  16  -2 17.5058  3.7700   1
  -9 -16   2 2.85531 2.31317   3
  -9  16   2 4.91357 3.04003   2
   9  16  -2 -0.4143  2.3551   1
  -8 -16   2 16.9452  3.2009   3
  -8  16   2 15.1813  3.6008   2
   8  16  -2 9.08671 3.25973   1
  -7 -16   2 0.52285 1.93634   3
  -7  16   2 -3.2779  2.1421   2
   7  16  -2 -1.9396  2.0712   1
  -6 -16   2 32.4549  3.8208   3
   6  16  -2 24.9340  3.8567   1
  -6  16   2 35.2096  4.3333   2
  -5 -16   2 2.51530 1.84697   3
  -5  16   2 -0.9513  1.6374   1
   5  16  -2 0.33059 1.99841   1
  -5  16   2 -1.4869  2.0522   2
  -4 -16   2 46.2211  3.9739   3
   4  16  -2 39.1881  4.3164   1
  -4  16   2 35.4731  3.9930   1
  -4  16   2 43.0581  4.5785   2
  -3 -16   2 101.268   6.582   3
  -3  16   2 112.698   6.904   1
   3  16  -2 103.053   6.956   1
  -2 -16   2 108.436   6.866   3
   2  16  -2 116.950   7.283   1
  -2  16   2 115.202   7.193   1
  -2  16   2 116.671   7.199   2
  -1 -16   2 69.9549  4.9361   3
   1 -16  -2 66.3767  4.6942   3
   1  16  -2 71.5631  5.1239   1
  -1  16   2 67.2883  4.8027   2
  -1  16   2 74.1330  5.2936   1
   1  16  -2 70.0863  4.9928   2
   0 -16   2 11.3445  2.3169   3
   0 -16  -2 13.1015  2.2499   3
   0  16   2 12.5953  2.3561   1
   0  16  -2 16.8755  2.5480   2
   0  16  -2 13.1290  2.3987   1
  -1 -16  -2 84.0191  5.5465   3
   1  16   2 96.8151  6.2529   1
  -1  16  -2 90.8553  5.9110   1
  -2 -16  -2 52.5578  4.2130   3
  -2  16  -2 55.4993  4.8264   2
  -2  16  -2 52.9806  4.3391   1
   2  16   2 54.6697  4.6633   1
  -3 -16  -2 28.9723  3.2045   3
  -3  16  -2 23.5969  2.9087   1
   3  16   2 20.2672  3.1780   1
  -3  16  -2 22.7871  3.5766   2
  -4 -16  -2 19.9885  3.0176   3
   4  16   2 16.5121  3.1767   1
  -4  16  -2 19.0626  3.3648   2
  -4  16  -2 20.2523  2.7926   1
  -5 -16  -2 2.22239 2.07851   3
  -5  16  -2 4.46926 2.63050   2
   5  16   2 2.01978 2.20126   1
  -6 -16  -2 0.59204 1.84439   3
   6  16   2 1.21543 2.26172   1
  -6  16  -2 0.16480 2.31991   2
  -7 -16  -2 -0.7192  1.8399   3
  -7  16  -2 0.57502 2.42475   2
   7  16   2 2.94062 2.57805   1
  -8 -16  -2 0.56893 2.08554   3
  -8  16  -2 -1.1350  2.4427   2
   8  16   2 8.38665 2.87231   1
  -9 -16  -2 6.57490 2.70024   3
   9  16   2 8.01721 3.05034   1
  -9  16  -2 5.13795 3.10800   2
 -10 -16  -2 12.6668  3.3640   3
 -10  16  -2 16.8446  4.2380   2
 -11 -16  -2 11.7377  3.3710   3
 -11  16  -2 8.65987 3.71167   2
 -12 -16  -2 6.79629 3.41172   3
 -12  16  -2 4.65929 3.85546   2
 -12 -17   2 -0.2845  2.5368   3
 -12  17   2 -2.8740  3.0998   2
 -11 -17   2 1.95908 2.57901   3
 -11  17   2 -1.7755  2.8500   2
 -10 -17   2 6.76230 2.82139   3
  10  17  -2 10.0243  3.5999   1
 -10  17   2 8.52817 3.59439   2
  -9 -17   2 14.4476  3.2080   3
  -9  17   2 18.3311  3.9697   2
   9  17  -2 19.3567  3.9154   1
  -8 -17   2 39.5306  4.6018   3
  -8  17   2 41.6428  5.3780   2
   8  17  -2 50.1834  5.5238   1
  -7 -17   2 43.3378  4.6410   3
  -7  17   2 41.5185  5.2176   2
   7  17  -2 42.5129  5.1220   1
  -6 -17   2 63.2051  5.4351   3
  -6  17   2 65.9073  5.7364   2
   6  17  -2 64.2336  5.7483   1
  -5 -17   2 12.8663  2.6804   3
   5  17  -2 11.4197  2.8742   1
  -5  17   2 11.9288  3.0758   2
  -4 -17   2 129.909   8.151   3
   4  17  -2 133.817   8.685   1
  -4  17   2 127.971   8.704   2
  -4  17   2 156.864   8.584   1
  -3 -17   2 6.37543 2.25070   3
  -3  17   2 9.92795 2.48993   1
   3  17  -2 9.24435 2.58298   1
  -2 -17   2 34.2118  3.7177   3
  -2  17   2 36.9893  4.0519   1
  -2  17   2 34.3494  3.5268   2
   2  17  -2 36.4878  4.0409   1
   1 -17  -2 2.22139 1.56788   3
  -1 -17   2 4.16670 1.89352   3
  -1  17   2 1.13773 1.75937   1
  -1  17   2 1.18802 1.57449   2
   1  17  -2 0.16231 1.85479   1
   0 -17  -2 -0.6871  1.2425   3
   0 -17   2 0.24230 1.44144   3
   0  17  -2 0.23116 1.55579   2
   0  17  -2 -2.1402  1.8058   1
   0  17   2 -1.1630  1.6253   1
  -1 -17  -2 8.30081 2.03190   3
  -1  17  -2 9.53478 2.55930   1
   1  17   2 7.51060 2.28726   1
  -1  17  -2 7.69701 2.44886   2
  -2 -17  -2 57.2008  4.4189   3
  -2  17  -2 47.5177  4.7804   2
   2  17   2 51.7012  4.7275   1
  -2  17  -2 45.7666  4.3184   1
  -3 -17  -2 10.2889  2.3551   3
   3  17   2 8.49602 2.67516   1
  -3  17  -2 11.5303  2.3820   1
  -3  17  -2 9.83142 2.63108   2
  -4 -17  -2 40.1630  4.1040   3
  -4  17  -2 39.2421  3.6855   1
  -4  17  -2 33.8486  4.3783   2
   4  17   2 33.5227  4.3919   1
  -5 -17  -2 49.0989  4.4749   3
   5  17   2 43.3053  4.9990   1
  -5  17  -2 41.9329  5.1004   2
  -6 -17  -2 60.1787  4.9273   3
   6  17   2 54.0050  5.7466   1
  -6  17  -2 60.1848  5.8698   2
  -7 -17  -2 12.8155  2.7623   3
   7  17   2 13.1621  3.5145   1
  -7  17  -2 14.5774  3.5931   2
  -8 -17  -2 24.3288  3.7429   3
   8  17   2 33.1535  4.7069   1
  -8  17  -2 24.8770  4.4593   2
  -9 -17  -2 12.3576  3.3121   3
   9  17   2 13.2012  3.7147   1
  -9  17  -2 16.4620  4.0352   2
 -10 -17  -2 3.25253 2.73126   3
 -10  17  -2 5.95849 3.53297   2
 -11 -17  -2 4.97291 3.09340   3
 -11  17  -2 1.96647 3.29574   2
 -12 -18   2 2.59038 2.96166   3
 -12  18   2 5.45143 3.64362   2
 -11 -18   2 5.02458 2.94987   3
 -11  18   2 0.34258 3.15219   2
 -10 -18   2 13.7147  3.2580   3
  10  18  -2 7.59605 3.23792   1
 -10  18   2 8.95609 3.92061   2
  -9 -18   2 -3.1996  2.1555   3
   9  18  -2 0.29862 2.50542   1
  -9  18   2 -1.5365  2.8401   2
  -8 -18   2 10.9525  2.8485   3
  -8  18   2 1.30308 2.87170   2
   8  18  -2 14.5585  3.4594   1
  -7 -18   2 -1.4711  1.9436   3
  -7  18   2 2.53393 3.03431   2
   7  18  -2 -0.3290  2.5673   1
  -6 -18   2 2.34153 2.17345   3
  -6  18   2 -0.4295  2.3292   2
   6  18  -2 -3.2639  2.0905   1
  -5 -18   2 11.5706  2.7837   3
  -5  18   2 14.4214  3.1872   2
   5  18  -2 12.0035  3.2661   1
  -4 -18   2 35.1006  3.9829   3
  -4  18   2 28.7288  3.9426   2
  -4  18   2 34.6613  3.8938   1
   4  18  -2 23.3911  3.7466   1
  -3 -18   2 59.9852  4.7947   3
  -3  18   2 63.4215  5.2092   1
   3  18  -2 51.1126  5.0177   1
  -2 -18   2 30.2576  3.6781   3
  -2  18   2 39.0602  4.1948   1
   2  18  -2 32.9298  4.1265   1
  -2  18   2 35.3010  3.8843   2
  -1 -18   2 21.5113  3.0857   3
   1 -18  -2 19.2471  2.8503   3
   1  18  -2 20.8129  3.3361   1
  -1  18   2 22.0264  3.3070   1
   0 -18  -2 42.6290  4.1886   3
   0 -18   2 49.2378  4.2005   3
   0  18  -2 43.7952  4.2874   2
   0  18   2 45.0657  4.3452   1
   0  18  -2 46.4611  4.7271   1
  -1 -18  -2 43.7975  4.1717   3
   1  18   2 41.8897  4.6289   1
  -1  18  -2 36.9308  4.3474   2
  -1  18  -2 43.8354  4.4232   1
  -2 -18  -2 68.8896  5.0838   3
   2  18   2 60.3130  5.4031   1
  -2  18  -2 70.8785  5.3047   1
  -2  18  -2 62.5073  5.4603   2
  -3 -18  -2 1.98935 2.00438   3
  -3  18  -2 3.35725 2.18894   2
   3  18   2 2.43907 2.28210   1
  -3  18  -2 2.94275 1.95051   1
  -4 -18  -2 21.6083  3.2461   3
   4  18   2 25.1912  3.9012   1
  -4  18  -2 21.1970  3.3704   1
  -4  18  -2 19.9361  3.5850   2
  -5 -18  -2 -0.5176  1.9467   3
  -5  18  -2 2.19433 2.36544   2
   5  18   2 3.29091 2.71890   1
  -6 -18  -2 2.88451 2.09822   3
  -6  18  -2 2.99245 2.86392   2
   6  18   2 1.93539 2.63436   1
  -7 -18  -2 2.69436 2.14638   3
   7  18   2 4.69392 2.92563   1
  -7  18  -2 -0.3912  2.6012   2
  -8 -18  -2 2.80494 2.58358   3
   8  18   2 -1.3374  2.5137   1
  -8  18  -2 -0.5876  2.9864   2
  -9 -18  -2 3.04770 2.76032   3
  -9  18  -2 0.70132 3.07005   2
   9  18   2 -2.5116  2.7638   1
 -10 -18  -2 10.5579  3.3729   3
  10  18   2 13.7505  4.3255   1
 -10  18  -2 7.34686 3.84429   2
 -11 -18  -2 10.1310  3.5563   3
 -11  18  -2 2.77772 3.73356   2
 -11 -19   2 3.67121 2.72697   3
 -11  19   2 0.21746 3.04483   2
 -10 -19   2 11.8794  3.4007   3
 -10  19   2 8.93409 4.00033   2
  10  19  -2 12.4472  4.0673   1
  -9 -19   2 1.60603 2.43204   3
   9  19  -2 -0.2533  2.8089   1
  -9  19   2 1.86451 2.99084   2
  -8 -19   2 48.2616  5.2103   3
  -8  19   2 49.9519  5.8041   2
   8  19  -2 42.2148  5.5872   1
  -7 -19   2 13.4566  3.2157   3
   7  19  -2 13.5060  3.5037   1
  -7  19   2 11.9567  3.4798   2
  -6 -19   2 52.6148  5.2615   3
   6  19  -2 55.1549  5.9327   1
  -6  19   2 51.1449  5.8127   2
  -5 -19   2 9.44716 2.58491   3
   5  19  -2 2.32452 2.56117   1
  -5  19   2 2.79178 2.48672   2
  -4 -19   2 38.2443  4.3268   3
  -4  19   2 40.4233  4.4336   1
   4  19  -2 23.5567  4.1196   1
  -4  19   2 50.0503  4.7543   2
  -3 -19   2 4.57947 2.19921   3
  -3  19   2 4.47113 2.35562   1
   3  19  -2 2.15641 2.06117   1
  -3  19   2 1.61161 2.32150   2
  -2 -19   2 7.52056 2.46892   3
   2  19  -2 11.7802  2.9233   1
  -2  19   2 9.26804 2.70825   1
  -1 -19   2 5.73243 2.15718   3
   1 -19  -2 2.65545 1.92613   3
  -1  19   2 4.61283 2.47939   1
   1  19  -2 1.30993 2.25657   1
   0 -19  -2 1.05803 1.82733   3
   0 -19   2 -1.4132  1.5966   3
   0  19   2 1.30161 2.17388   1
   0  19  -2 -5.6510  2.0276   1
  -1 -19  -2 0.15823 1.68868   3
  -1  19  -2 -3.1564  1.9611   1
  -1  19  -2 -1.3335  1.9880   2
   1  19   2 -2.3957  1.9855   1
  -2 -19  -2 11.9983  2.5797   3
   2  19   2 20.0086  3.5821   1
  -2  19  -2 10.2123  2.6182   2
  -2  19  -2 16.3589  2.9482   1
  -3 -19  -2 -0.8923  1.9314   3
   3  19   2 1.00145 2.28076   1
  -3  19  -2 0.35773 2.10958   2
  -3  19  -2 4.28651 2.24435   1
  -4 -19  -2 72.0348  5.4093   3
   4  19   2 61.2775  5.8316   1
  -4  19  -2 65.1328  5.9286   2
  -5 -19  -2 8.33460 2.49812   3
   5  19   2 -0.8289  2.4060   1
  -5  19  -2 1.69988 2.51837   2
  -6 -19  -2 38.1320  4.4581   3
   6  19   2 48.2519  5.6740   1
  -6  19  -2 40.6895  5.3830   2
  -7 -19  -2 9.80626 2.95650   3
  -7  19  -2 9.94447 3.44783   2
   7  19   2 9.36367 3.47244   1
  -8 -19  -2 30.9703  4.2554   3
  -8  19  -2 28.7146  4.9177   2
   8  19   2 29.1716  4.9605   1
  -9 -19  -2 11.5888  3.2298   3
  -9  19  -2 10.2028  3.8686   2
   9  19   2 4.92622 3.45490   1
 -10 -19  -2 0.91958 2.92344   3
  10  19   2 7.91298 3.63812   1
 -10  19  -2 8.58602 4.12533   2
 -11 -20   2 -0.1716  2.7477   3
 -11  20   2 -2.2083  3.3067   2
 -10 -20   2 5.03039 2.87258   3
 -10  20   2 4.16043 3.44528   2
  10  20  -2 7.56868 3.49548   1
  -9 -20   2 -4.0990  2.0843   3
   9  20  -2 3.51722 3.17724   1
  -9  20   2 -0.1461  3.1037   2
  -8 -20   2 0.14552 2.42274   3
   8  20  -2 6.70562 3.04936   1
  -8  20   2 1.03820 2.94467   2
  -7 -20   2 0.86037 2.33282   3
   7  20  -2 2.41291 2.93850   1
  -7  20   2 1.73520 2.70576   2
  -6 -20   2 1.32853 2.15188   3
   6  20  -2 3.94649 2.75466   1
  -6  20   2 -0.2240  2.4964   2
  -5 -20   2 0.97794 2.19402   3
   5  20  -2 2.03183 2.71908   1
  -5  20   2 6.25978 2.90344   2
  -4 -20   2 9.20008 2.77108   3
  -4  20   2 8.86586 2.65914   1
   4  20  -2 8.03146 2.92994   1
  -4  20   2 11.5568  2.9141   2
  -3 -20   2 7.09025 2.46892   3
   3  20  -2 2.81568 2.51004   1
  -3  20   2 5.15710 2.60295   1
  -3  20   2 0.54161 2.20895   2
  -2 -20   2 98.7034  6.8789   3
   2  20  -2 94.7632  7.0598   1
  -2  20   2 95.6890  7.0458   1
   1 -20  -2 8.81625 2.50847   3
  -1 -20   2 11.4143  2.8256   3
  -1  20   2 8.19805 2.88795   1
   0 -20  -2 100.498   6.611   3
   0 -20   2 99.2866  6.8236   3
   0  20   2 100.906   7.301   1
   0  20  -2 94.6918  7.0013   1
  -1 -20  -2 4.69604 2.05783   3
  -1  20  -2 0.99541 2.12147   1
   1  20   2 5.04378 2.50227   1
  -2 -20  -2 38.3099  4.0841   3
   2  20   2 37.7588  4.7523   1
  -2  20  -2 39.9059  4.5164   1
  -3 -20  -2 -1.6629  1.8920   3
  -3  20  -2 0.66807 2.23043   2
  -3  20  -2 -1.3250  1.9889   1
   3  20   2 -1.8971  2.2253   1
  -4 -20  -2 37.1889  4.2874   3
   4  20   2 27.9489  4.4232   1
  -4  20  -2 30.6974  4.5312   2
  -5 -20  -2 0.35479 2.20499   3
   5  20   2 -1.9589  2.4860   1
  -5  20  -2 2.63505 2.74289   2
  -6 -20  -2 3.90193 2.34400   3
   6  20   2 -2.4297  2.5075   1
  -6  20  -2 -1.4544  2.4912   2
  -7 -20  -2 -2.7849  1.9184   3
  -7  20  -2 2.30712 3.04679   2
   7  20   2 0.77671 2.79198   1
  -8 -20  -2 2.61255 2.53105   3
   8  20   2 1.94002 3.13622   1
  -8  20  -2 -2.4728  2.9216   2
  -9 -20  -2 4.82042 2.92405   3
   9  20   2 0.28325 2.98616   1
  -9  20  -2 0.83246 3.49416   2
 -10 -20  -2 3.27652 3.06665   3
  10  20   2 10.5415  4.0095   1
 -10  20  -2 7.30546 4.11058   2
 -10 -21   2 9.31128 3.11774   3
  10  21  -2 6.44091 3.72297   1
 -10  21   2 11.7844  4.0190   2
  -9 -21   2 -2.6790  2.3644   3
   9  21  -2 0.42140 3.04725   1
  -9  21   2 -0.5727  3.2182   2
  -8 -21   2 25.6316  4.1895   3
  -8  21   2 17.7822  4.3400   2
   8  21  -2 17.9841  4.3117   1
  -7 -21   2 0.01868 2.17719   3
   7  21  -2 -1.3518  2.6250   1
  -7  21   2 1.53164 2.72937   2
  -6 -21   2 30.9603  4.3259   3
   6  21  -2 24.9809  4.3078   1
  -6  21   2 21.6783  4.0873   2
  -5 -21   2 -0.0628  2.0717   3
  -5  21   2 0.21247 2.43016   2
   5  21  -2 0.03919 2.48024   1
  -4 -21   2 34.4490  4.2595   3
   4  21  -2 31.2434  4.5072   1
  -4  21   2 19.7340  3.5394   2
  -4  21   2 33.3254  4.3610   1
  -3 -21   2 1.34019 2.24507   3
  -3  21   2 1.75738 2.52942   1
   3  21  -2 -1.1165  2.3648   1
  -2 -21   2 11.8187  2.9051   3
   2  21  -2 10.3653  3.1213   1
  -2  21   2 13.6073  3.3394   1
  -1 -21   2 -0.4880  1.9854   3
   1 -21  -2 2.37322 2.11248   3
   1  21  -2 2.93443 2.52692   1
  -1  21   2 3.68232 2.76666   1
   0 -21   2 -2.3391  1.8133   3
   0 -21  -2 -1.7494  1.9168   3
   0  21   2 -1.2595  2.4822   1
   0  21  -2 1.89500 2.19375   1
  -1 -21  -2 4.82425 2.20452   3
  -1  21  -2 3.49990 2.43126   1
   1  21   2 1.99743 2.62097   1
  -2 -21  -2 3.47338 2.32568   3
   2  21   2 6.26357 3.00514   1
  -2  21  -2 1.53715 1.86290   2
  -2  21  -2 4.48012 2.49291   1
  -3 -21  -2 0.37749 2.19007   3
  -3  21  -2 -2.9070  2.2147   2
   3  21   2 -5.0795  2.1531   1
  -3  21  -2 0.09583 2.09733   1
  -4 -21  -2 35.3610  4.5181   3
  -4  21  -2 46.7061  5.5290   2
   4  21   2 41.5391  5.5220   1
  -5 -21  -2 2.37069 2.43769   3
   5  21   2 -1.0479  2.5328   1
  -5  21  -2 2.41782 3.04204   2
  -6 -21  -2 27.6308  4.1822   3
   6  21   2 37.6070  5.2200   1
  -6  21  -2 25.6128  4.8403   2
  -7 -21  -2 2.82385 2.68065   3
   7  21   2 0.71468 2.86117   1
  -7  21  -2 -1.5874  2.7140   2
  -8 -21  -2 19.6218  3.8113   3
   8  21   2 21.1583  4.7367   1
  -8  21  -2 10.7788  3.9997   2
  -9 -21  -2 2.31001 2.81352   3
   9  21   2 0.83481 3.32583   1
  -9  21  -2 -1.5377  3.1625   2
  -9 -22   2 -1.1905  2.5191   3
  -9  22   2 5.38531 3.85993   2
   9  22  -2 2.17903 3.14214   1
  -8 -22   2 1.50096 2.50333   3
   8  22  -2 -0.8455  3.1947   1
  -8  22   2 5.46309 3.41105   2
  -7 -22   2 -0.2561  2.4328   3
  -7  22   2 2.61868 3.20608   2
   7  22  -2 1.07893 3.12697   1
  -6 -22   2 0.98568 2.50678   3
   6  22  -2 0.11602 2.80433   1
  -6  22   2 0.25246 2.72327   2
  -5 -22   2 -1.8280  2.3263   3
   5  22  -2 0.86209 2.78252   1
  -5  22   2 -2.4028  2.3291   2
  -4 -22   2 11.1324  3.0804   3
   4  22  -2 13.4122  3.4073   1
  -3 -22   2 0.21035 2.24348   3
  -3  22   2 0.61834 2.37032   1
   3  22  -2 3.73359 2.70203   1
  -2 -22   2 38.9958  4.5630   3
   2  22  -2 28.4377  4.5002   1
  -2  22   2 42.6560  4.9928   1
  -1 -22   2 12.1722  2.9408   3
  -1  22   2 6.76776 2.95583   1
   0 -22  -2 54.7106  4.9163   3
   0  22   2 53.2018  5.9130   1
   0  22  -2 56.6574  5.4192   1
  -1 -22  -2 3.13216 2.31322   3
  -1  22  -2 2.61017 2.47607   1
   1  22   2 7.71768 3.00523   1
  -2 -22  -2 46.3057  5.1257   3
   2  22   2 53.9938  5.9615   1
  -2  22  -2 51.7158  5.3972   1
  -3 -22  -2 -1.3226  2.1474   3
  -3  22  -2 0.75505 2.62921   1
  -3  22  -2 1.51468 2.70226   2
   3  22   2 5.69062 3.12727   1
  -4 -22  -2 20.9505  3.6446   3
   4  22   2 12.2800  3.6723   1
  -4  22  -2 22.4554  4.2824   2
  -5 -22  -2 2.41652 2.34893   3
  -5  22  -2 2.80988 3.02651   2
   5  22   2 0.54417 2.97137   1
  -6 -22  -2 -0.8339  2.1438   3
   6  22   2 -3.9377  2.5382   1
  -6  22  -2 -3.0639  2.6896   2
  -7 -22  -2 1.82632 2.64920   3
   7  22   2 -0.3809  3.0801   1
  -7  22  -2 -1.6041  3.2894   2
  -8 -22  -2 -1.8870  2.5975   3
   8  22   2 3.29938 3.49712   1
  -8  22  -2 2.79781 3.75126   2
  -9 -22  -2 -1.6654  2.7122   3
  -9  22  -2 -1.6133  3.8023   2
   9  22   2 3.23572 3.85452   1
  -9 -23   2 -0.4988  2.5235   3
   9  23  -2 2.13975 3.42463   1
  -9  23   2 -0.9261  3.3663   2
  -8 -23   2 13.5729  3.4815   3
   8  23  -2 13.0012  4.3320   1
  -8  23   2 14.4533  4.3337   2
  -7 -23   2 -0.0877  2.4332   3
  -7  23   2 3.74337 3.32613   2
   7  23  -2 -4.4156  2.7765   1
  -6 -23   2 15.6074  3.6003   3
  -6  23   2 14.5053  3.9315   2
   6  23  -2 17.6728  4.2340   1
  -5 -23   2 1.80653 2.42553   3
   5  23  -2 1.80415 2.87515   1
  -4 -23   2 20.3591  3.7492   3
   4  23  -2 16.8342  4.0439   1
  -3 -23   2 -0.1677  2.4693   3
   3  23  -2 -0.0679  2.5146   1
  -3  23   2 -0.0183  2.7738   1
  -2 -23   2 8.70118 3.00219   3
  -2  23   2 12.5026  3.3366   1
   2  23  -2 4.52851 2.87860   1
  -1 -23   2 -2.6006  2.0280   3
   1  23  -2 -1.2234  2.5187   1
  -1  23   2 -0.4938  2.6504   1
   0 -23  -2 3.33953 2.53407   3
   0  23   2 0.09016 2.96620   1
   0  23  -2 1.93799 2.66355   1
  -1 -23  -2 -2.2432  2.1011   3
  -1  23  -2 -2.9579  2.6399   1
   1  23   2 -1.8627  2.9024   1
  -2 -23  -2 14.8120  3.2062   3
  -2  23  -2 7.22408 2.99164   1
   2  23   2 5.96032 3.34272   1
  -3 -23  -2 0.51227 2.27700   3
   3  23   2 -1.2569  2.8499   1
  -4 -23  -2 18.5429  3.6484   3
  -4  23  -2 10.0819  3.5465   2
   4  23   2 11.0730  3.7292   1
  -5 -23  -2 3.03929 2.55832   3
  -5  23  -2 -1.8396  2.5841   2
   5  23   2 6.45534 3.64453   1
  -6 -23  -2 16.1628  3.6181   3
   6  23   2 14.8344  4.1799   1
  -6  23  -2 15.4730  4.3896   2
  -7 -23  -2 1.34208 2.48825   3
  -7  23  -2 -3.7133  3.1398   2
   7  23   2 0.27250 3.05080   1
  -8 -23  -2 11.0934  3.4240   3
  -8  23  -2 3.09390 3.90827   2
   8  23   2 16.8783  4.8124   1
  -8 -24   2 -0.9997  2.5810   3
  -8  24   2 -0.0061  3.1603   2
   8  24  -2 -1.6207  3.3854   1
  -7 -24   2 1.41310 2.77590   3
  -7  24   2 -1.7807  3.2010   2
   7  24  -2 2.40075 3.33288   1
  -6 -24   2 -2.0716  2.6049   3
   6  24  -2 -2.4428  2.7998   1
  -5 -24   2 2.53029 2.69404   3
   5  24  -2 -4.2748  2.4787   1
  -4 -24   2 6.60644 2.95934   3
   4  24  -2 3.26631 3.05919   1
  -3 -24   2 1.26265 2.59513   3
  -3  24   2 3.22415 2.93720   1
   3  24  -2 2.39500 3.13333   1
  -2 -24   2 23.6010  4.1320   3
   2  24  -2 26.6428  4.6819   1
  -2  24   2 30.6088  4.8093   1
  -1 -24   2 14.5751  3.4881   3
   1  24  -2 10.0715  3.6049   1
  -1  24   2 10.1092  3.4832   1
   0 -24  -2 34.7202  4.6086   3
   0  24   2 36.2619  5.2779   1
   0  24  -2 41.2623  5.3657   1
  -1 -24  -2 5.14404 2.71271   3
   1  24   2 4.22503 3.14214   1
  -1  24  -2 2.62963 2.78399   1
  -2 -24  -2 28.1051  4.3237   3
   2  24   2 23.1081  4.5105   1
  -2  24  -2 17.2644  3.9638   1
  -3 -24  -2 8.91314 3.03209   3
   3  24   2 3.97338 3.25341   1
  -4 -24  -2 7.51136 2.96701   3
   4  24   2 9.51252 3.66043   1
  -5 -24  -2 1.91384 2.57742   3
  -5  24  -2 4.37261 3.50352   2
   5  24   2 -2.3542  2.8724   1
  -6 -24  -2 -2.2985  2.3574   3
  -6  24  -2 -4.0757  3.0734   2
   6  24   2 5.10602 3.50946   1
  -7 -24  -2 -1.6979  2.6165   3
  -7  24  -2 -1.6668  3.5132   2
   7  24   2 -2.4870  3.1561   1
  -7 -25   2 0.43365 2.76454   3
   7  25  -2 4.22021 3.52350   1
  -6 -25   2 2.07789 2.81597   3
   6  25  -2 0.20585 3.12977   1
  -5 -25   2 0.49435 2.50329   3
   5  25  -2 0.51721 3.08833   1
  -4 -25   2 6.49968 2.94500   3
   4  25  -2 5.37523 3.56182   1
  -3 -25   2 2.40579 2.80698   3
  -3  25   2 2.30472 3.13785   1
   3  25  -2 2.21815 3.31482   1
  -2 -25   2 0.87343 2.63427   3
   2  25  -2 7.67241 3.45132   1
  -2  25   2 4.97689 3.39045   1
  -1 -25   2 -4.9975  2.3622   3
   1  25  -2 1.39024 2.97506   1
  -1  25   2 -1.0902  2.7861   1
   0 -25  -2 0.37955 2.70774   3
   0  25   2 -2.4062  2.9139   1
   0  25  -2 0.56970 2.77154   1
  -1 -25  -2 -0.4376  2.5580   3
  -1  25  -2 -1.7874  2.7220   1
   1  25   2 -3.3260  2.8792   1
  -2 -25  -2 -0.2094  2.6434   3
  -2  25  -2 3.10823 3.14644   1
   2  25   2 -1.1454  2.9358   1
  -3 -25  -2 1.25769 2.71828   3
   3  25   2 2.68486 3.13306   1
  -4 -25  -2 7.06881 3.04158   3
   4  25   2 8.34926 3.80774   1
  -5 -25  -2 7.18205 3.31751   3
   5  25   2 12.0978  4.2180   1
  -6 -25  -2 3.47966 2.93470   3
   6  25   2 15.3977  4.4996   1
  -6  25  -2 3.84111 3.87590   2
  -5 -26   2 -0.3494  2.5952   3
   5  26  -2 0.63300 3.16915   1
  -4 -26   2 -0.1682  2.7906   3
   4  26  -2 5.03191 3.74052   1
  -3 -26   2 6.47902 3.15655   3
   3  26  -2 -0.0164  3.2215   1
  -2 -26   2 7.47061 3.41502   3
  -2  26   2 8.45355 3.78330   1
   2  26  -2 15.2949  4.3159   1
  -1  26   2 18.1766  4.3518   1
   1  26  -2 12.6973  3.9814   1
   0  26   2 19.4189  4.4628   1
   0  26  -2 15.7111  4.2340   1
  -1 -26  -2 3.66942 3.03520   3
  -1  26  -2 8.59884 3.59054   1
   1  26   2 3.20904 3.57250   1
  -2 -26  -2 8.22979 3.35118   3
   2  26   2 17.2532  4.4770   1
  -2  26  -2 14.6919  4.0213   1
  -3 -26  -2 1.51510 2.81132   3
   3  26   2 0.95952 3.48210   1
  -4 -26  -2 6.63724 3.36138   3
   4  26   2 9.86000 3.79220   1
  -5 -26  -2 0.74786 2.98204   3
   5  26   2 0.72947 3.40243   1
  -4 -27   2 6.57464 3.59418   3
   4  27  -2 4.72773 3.66362   1
  -3 -27   2 1.37479 3.02149   3
   3  27  -2 1.85532 3.28644   1
  -2 -27   2 0.60258 2.70740   3
  -2  27   2 -2.2766  2.8987   1
   2  27  -2 1.41017 3.31248   1
  -1  27   2 5.50606 3.72678   1
   1  27  -2 8.88586 3.86273   1
   0  27  -2 2.52451 3.18517   1
   0  27   2 -4.2648  2.9448   1
  -1 -27  -2 1.85415 3.11367   3
  -1  27  -2 3.04329 3.44621   1
   1  27   2 -0.5574  3.2634   1
  -2 -27  -2 -1.4672  2.9864   3
   2  27   2 2.82642 3.32769   1
  -3 -27  -2 0.88228 3.03018   3
   3  27   2 6.65899 3.84634   1
 -15   0   3 1.97928 3.06728   3
 -14   0   3 -0.8313  2.5339   3
 -13   0   3 0.89383 2.71448   3
 -13   0   3 9.33065 2.98261   2
 -12   0   3 -4.4085  2.1049   3
 -12   0   3 -4.3891  2.0596   2
 -11   0   3 111.000   7.757   2
 -11   0   3 114.040   8.089   3
 -10   0   3 -2.3862  1.4556   3
 -10   0   3 -1.1331  1.6545   2
  -9   0   3 44.8062  4.0054   3
  -9   0   3 41.4934  3.9024   2
  -8   0   3 -0.7755  1.2787   3
  -8   0   3 0.89022 1.46813   2
  -7   0   3 265.080  14.149   2
   7   0  -3 262.394  12.658   1
  -7   0   3 264.596  13.209   3
   6   0  -3 -0.9796  0.4757   1
  -6   0   3 -0.0222  0.7870   3
  -6   0   3 -0.8440  0.9434   2
   5   0  -3 407.950  19.280   1
  -5   0   3 411.585  20.827   2
  -4   0   3 -0.2460  0.4643   3
   4   0  -3 -0.6865  0.4072   1
  -4   0   3 0.23772 0.63167   2
  -3   0   3 523.782  25.098   1
   3   0  -3 556.922  25.186   1
  -3   0   3 543.007  24.223   3
  -3   0   3 526.104  26.663   2
  -2   0   3 0.14137 0.50051   2
   2   0  -3 -1.3373  0.2498   1
  -2   0   3 -1.3147  0.4231   1
  -1   0   3 350.588  15.538   1
  -1   0   3 304.590  16.253   2
   0   0   3 -0.7109  0.2919   1
   0   0   3 0.10177 0.34738   2
   1   0   3 -0.0491  0.1729   1
   3   0   3 1093.01   50.64   1
  -3   0  -3 1089.15   53.62   2
   4   0   3 0.56633 0.54655   1
  -4   0  -3 -0.4012  0.5819   2
   5   0   3 475.527  21.761   1
  -5   0  -3 439.729  23.193   2
  -6   0  -3 -1.1749  0.9283   2
   6   0   3 0.10753 0.61577   1
  -7   0  -3 451.389  23.215   2
  -8   0  -3 -1.0943  1.2332   2
  -9   0  -3 254.500  13.872   2
  -9   0  -3 240.906  13.755   3
 -10   0  -3 -2.8658  1.8434   3
 -10   0  -3 -3.2610  1.6723   2
 -11   0  -3 18.8416  4.0086   3
 -12   0  -3 -0.4870  2.3443   3
 -13   0  -3 -0.3692  2.9767   3
 -14   0  -3 -1.7583  3.0191   3
 -15  -1   3 23.5830  4.6276   3
 -15   1   3 26.8076  4.8883   3
 -14  -1   3 -3.4602  2.2623   3
 -14   1   3 2.80944 2.71001   3
 -13  -1   3 83.8159  6.9695   3
 -13   1   3 89.2130  7.0413   2
 -13   1   3 84.1800  7.2846   3
 -12  -1   3 -0.9303  2.2720   3
 -12  -1   3 -0.8485  2.1872   2
 -12   1   3 1.38136 2.41942   2
 -12   1   3 2.95674 2.75248   3
 -11  -1   3 183.695  11.013   3
 -11  -1   3 193.914  11.152   2
 -11   1   3 190.127  11.341   2
 -11   1   3 161.715  10.687   3
 -10  -1   3 -0.4569  1.6005   3
 -10  -1   3 -2.0564  1.5440   2
 -10   1   3 -1.3157  1.7175   3
 -10   1   3 -0.9143  1.5839   2
  -9  -1   3 53.7273  4.3065   2
  -9  -1   3 46.9630  4.2809   3
  -9   1   3 52.7024  4.3584   3
  -9   1   3 58.0709  4.5737   2
  -8  -1   3 -0.0749  1.4035   2
  -8  -1   3 0.93245 1.42686   3
  -8   1   3 -2.5600  1.2747   3
  -8   1   3 -0.3527  1.3223   2
  -7  -1   3 4.50093 1.47848   2
   7   1  -3 6.03741 1.11285   1
   6  -1  -3 1.41957 0.60794   1
  -6  -1   3 3.19126 1.13078   3
  -6  -1   3 1.78808 1.03430   2
   6   1  -3 1.62484 0.79632   1
  -6   1   3 2.40064 1.25682   2
  -6   1   3 0.27551 1.00272   3
  -5  -1   3 52.9079  3.4283   3
  -5  -1   3 56.1615  3.5784   2
   5  -1  -3 49.2281  2.9990   1
   5   1  -3 60.1442  3.1586   1
  -4  -1   3 19.7716  1.7225   2
   4  -1  -3 19.7487  1.4324   1
  -4   1   3 17.4958  1.7260   2
   4   1  -3 19.1288  1.4446   1
  -4   1   3 21.0222  1.3899   1
  -3  -1   3 660.917  32.395   3
  -3  -1   3 735.343  35.671   2
  -3   1   3 746.528  35.754   2
  -3   1   3 755.081  33.653   1
   3   1  -3 720.605  33.698   1
  -2  -1   3 1393.59   62.24   1
  -2  -1   3 1378.12   59.72   3
  -2  -1   3 1297.80   65.75   2
   2   1  -3 1302.40   62.25   1
  -2   1   3 1369.25   62.24   1
  -2   1   3 1338.15   65.79   2
  -1  -1   3 480.468  23.333   1
  -1   1   3 503.359  24.562   2
   1   1  -3 486.125  23.361   1
  -1   1   3 519.765  23.411   1
   0  -1   3 2.25599 0.61221   2
   0  -1   3 2.02589 0.57720   1
   0   1   3 2.65417 0.66469   1
   1   1   3 854.493  39.840   1
   2  -1   3 736.440  34.545   1
   2   1   3 746.918  34.650   1
  -3  -1  -3 780.926  38.108   2
   3  -1   3 763.955  35.986   1
  -3   1  -3 762.424  38.284   2
   3   1   3 783.438  36.117   1
   4  -1   3 15.4654  1.3448   1
  -4  -1  -3 14.6752  1.6445   2
  -4   1  -3 14.9848  1.7691   2
   4   1   3 18.5084  1.5268   1
   5  -1   3 333.125  15.931   1
  -5  -1  -3 335.979  17.107   2
   5   1   3 335.511  16.128   1
  -5   1  -3 329.151  17.286   2
   6  -1   3 21.4689  1.7246   1
  -6  -1  -3 23.8955  2.3682   2
   6   1   3 27.3445  2.0871   1
  -6   1  -3 21.7417  2.4936   2
  -7  -1  -3 11.9960  1.9767   2
  -7  -1  -3 10.2843  2.5482   3
  -7   1  -3 17.6366  2.3587   2
  -8  -1  -3 3.08394 1.53941   2
  -8  -1  -3 8.09808 2.54268   3
  -8   1  -3 3.78540 1.63728   2
  -9  -1  -3 71.0773  6.4531   3
  -9  -1  -3 89.5127  5.9387   2
  -9   1  -3 84.9004  6.0321   2
 -10  -1  -3 5.43632 2.59547   3
 -10   1  -3 5.37498 2.64797   3
 -10   1  -3 3.13205 2.18360   2
 -11  -1  -3 57.2052  6.3545   3
 -11   1  -3 53.3837  4.9777   2
 -11   1  -3 58.2035  6.3424   3
 -12  -1  -3 -1.6413  2.5012   3
 -12   1  -3 -1.8972  2.1567   3
 -13  -1  -3 54.9391  6.6069   3
 -13   1  -3 42.1564  6.0154   3
 -14  -1  -3 -3.6593  2.6309   3
 -14   1  -3 -1.4001  2.9093   3
 -15  -2   3 -1.2549  3.1045   3
 -15   2   3 5.06911 3.19918   3
 -14  -2   3 -2.1765  2.5526   3
 -14   2   3 -1.8272  2.4908   3
 -14   2   3 1.48440 2.70873   2
 -13  -2   3 -2.5122  2.6467   3
 -13   2   3 4.55743 2.75354   2
 -13   2   3 -0.5848  2.9273   3
 -12  -2   3 -2.6354  2.2925   2
 -12  -2   3 -2.2967  2.2583   3
 -12   2   3 -2.1796  2.4954   2
 -12   2   3 -0.6461  2.3898   3
 -11  -2   3 57.7417  5.9057   3
 -11  -2   3 70.9435  5.4050   2
 -11   2   3 68.9600  5.7284   2
 -11   2   3 55.7295  5.9281   3
 -10  -2   3 2.53221 2.09501   3
 -10  -2   3 3.65595 1.86542   2
 -10   2   3 1.92904 1.99310   2
 -10   2   3 1.65430 1.94843   3
  -9  -2   3 42.3327  4.0716   3
  -9  -2   3 49.4982  4.0156   2
  -9   2   3 48.5113  4.1734   3
  -9   2   3 50.3994  4.3971   2
  -8  -2   3 28.4175  3.2315   3
  -8  -2   3 28.9544  2.9188   2
   8   2  -3 27.8371  2.4187   1
  -8   2   3 30.2826  3.4048   2
  -7  -2   3 541.346  27.626   2
  -7  -2   3 581.040  25.767   3
   7   2  -3 543.015  25.755   1
  -7   2   3 519.940  27.851   2
   6  -2  -3 185.940   9.033   1
  -6  -2   3 195.899   9.647   3
  -6  -2   3 184.213  10.146   2
   6   2  -3 194.801   9.348   1
  -6   2   3 180.282  10.412   2
  -5  -2   3 874.978  43.150   2
   5  -2  -3 849.587  40.437   1
  -5  -2   3 886.261  39.543   3
  -5   2   3 871.855  43.389   2
   5   2  -3 882.408  40.623   1
  -4  -2   3 0.53027 0.54661   3
  -4  -2   3 0.01364 0.55860   2
  -4   2   3 1.04637 0.78614   2
   4   2  -3 0.28129 0.53917   1
  -4   2   3 0.83673 0.45080   1
  -3  -2   3 2.62470 0.69350   2
  -3   2   3 2.03196 0.55395   1
  -3   2   3 1.57414 0.67125   2
  -2  -2   3 949.415  50.223   2
  -2   2   3 990.692  47.552   1
  -2   2   3 1045.31   50.29   2
   2   2  -3 1120.16   47.63   1
  -1  -2   3 29.7758  2.3095   2
  -1   2   3 43.5722  2.3172   2
   1   2  -3 37.0428  2.3030   1
  -1   2   3 34.5586  2.2810   1
   0  -2   3 367.332  17.103   1
   0  -2   3 358.608  18.156   2
   0   2   3 359.854  17.865   2
   0   2   3 337.485  17.131   1
   0   2  -3 380.529  17.151   1
   1  -2   3 3104.46  142.27   1
  -1  -2  -3 3082.46  137.02   3
   1   2   3 3045.95  142.39   1
  -1   2  -3 3147.62  142.29   1
   1   2   3 3084.59  150.30   2
   2  -2   3 80.6769  4.1175   1
  -2  -2  -3 74.5532  4.1994   3
  -3  -2  -3 1071.07   48.80   3
   3  -2   3 1071.75   50.09   1
  -3  -2  -3 1102.61   53.00   2
  -3   2  -3 1058.22   53.36   2
   3   2   3 1105.87   50.37   1
  -4  -2  -3 30.2809  2.1194   2
  -4  -2  -3 27.4595  2.7637   3
   4  -2   3 24.8422  1.7989   1
  -4   2  -3 27.3936  2.3957   2
   4   2   3 32.2968  2.2105   1
  -5  -2  -3 313.015  15.135   3
   5  -2   3 291.276  14.447   1
  -5  -2  -3 316.049  15.613   2
   5   2   3 306.213  14.893   1
  -5   2  -3 298.997  15.958   2
  -6  -2  -3 123.456   7.400   3
  -6  -2  -3 128.450   7.061   2
   6   2   3 124.350   6.717   1
  -6   2  -3 119.590   7.377   2
  -7  -2  -3 402.461  20.730   2
  -7  -2  -3 408.225  20.181   3
  -7   2  -3 402.952  21.131   2
  -8  -2  -3 38.0497  3.2480   2
  -8  -2  -3 37.9735  4.4299   3
  -8   2  -3 37.2335  3.6007   2
  -9  -2  -3 236.525  13.239   3
  -9  -2  -3 228.296  12.805   2
  -9   2  -3 233.999  13.222   2
 -10  -2  -3 4.79281 2.60425   3
 -10   2  -3 2.96821 2.17216   2
 -11  -2  -3 20.3325  4.0246   3
 -11   2  -3 20.0847  3.9466   3
 -11   2  -3 21.8418  3.5024   2
 -12  -2  -3 -0.2570  2.4500   3
 -12   2  -3 1.20867 2.55340   3
 -13  -2  -3 -1.8919  2.9133   3
 -13   2  -3 0.71988 2.89192   3
 -14  -2  -3 1.27651 2.89333   3
 -14   2  -3 -2.4399  2.7505   3
 -15  -3   3 27.9403  4.8560   3
 -15   3   3 16.7631  4.2045   3
 -14  -3   3 5.28884 3.12814   3
 -14   3   3 6.21432 3.10339   2
 -14   3   3 6.29938 3.43983   3
 -13  -3   3 71.0985  6.7042   3
 -13   3   3 81.0321  6.7940   3
 -13   3   3 83.5971  6.9856   2
 -12  -3   3 21.4640  4.0776   3
 -12   3   3 18.1167  3.6283   2
 -12   3   3 40.4969  4.8578   3
 -11  -3   3 91.9635  6.5311   2
 -11  -3   3 93.7212  6.9940   3
 -11   3   3 95.6142  7.0770   3
 -11   3   3 98.4694  7.2371   2
 -10  -3   3 1.48194 2.08981   3
 -10  -3   3 3.30247 1.93450   2
 -10   3   3 2.68193 2.06267   3
 -10   3   3 2.27037 2.23019   2
  -9  -3   3 110.021   6.896   2
  -9  -3   3 112.475   6.986   3
  -9   3   3 108.209   7.381   2
  -8  -3   3 3.73259 1.53159   2
  -8  -3   3 1.99345 1.64165   3
   8   3  -3 2.24070 1.10569   1
  -8   3   3 0.07496 1.62699   2
  -7  -3   3 1.52642 1.28036   3
  -7  -3   3 1.30765 1.18392   2
   7   3  -3 2.59677 1.07117   1
   6  -3  -3 0.98627 0.58765   1
  -6  -3   3 -0.3229  0.9340   2
  -6  -3   3 4.37607 1.23770   3
   6   3  -3 3.64014 1.02016   1
  -6   3   3 3.47779 1.54337   2
   5  -3  -3 77.8728  4.0111   1
  -5  -3   3 69.8310  4.4775   2
  -5  -3   3 68.2307  4.3051   3
   5   3  -3 75.5538  4.2449   1
  -5   3   3 82.4714  3.9556   1
  -4  -3   3 129.614   7.049   2
  -4  -3   3 127.981   6.569   3
  -4   3   3 127.643   6.497   1
  -4   3   3 138.768   7.380   2
  -3  -3   3 87.4753  4.7505   3
  -3  -3   3 93.9080  5.2183   2
  -3   3   3 93.6217  4.9179   1
   3   3  -3 95.9517  5.0049   1
  -3   3   3 106.234   5.481   2
  -2  -3   3 77.4929  4.3725   2
  -2  -3   3 69.7930  3.8314   3
   2   3  -3 90.5683  4.2591   1
  -2   3   3 75.0983  4.1452   1
  -1  -3   3 1568.73   69.25   3
  -1  -3   3 1534.96   76.25   2
  -1   3   3 1575.82   72.12   1
   1   3  -3 1558.61   72.08   1
   0  -3  -3 647.388  27.578   3
   0   3   3 594.372  30.272   2
   0   3  -3 601.477  28.879   1
   0   3   3 627.195  29.006   1
  -1  -3  -3 2062.86   92.01   3
  -1   3  -3 2130.97   95.57   1
   1   3   3 2027.33   95.71   1
   2  -3   3 0.00665 0.39853   1
  -2  -3  -3 0.72258 0.61019   3
  -2   3  -3 0.79523 0.72140   2
   2   3   3 1.28544 0.56796   1
  -2   3  -3 0.66651 0.47294   1
  -3  -3  -3 941.803  46.231   2
  -3  -3  -3 925.903  42.750   3
   3  -3   3 959.088  43.777   1
  -3   3  -3 919.186  46.802   2
  -3   3  -3 957.493  43.787   1
   3   3   3 963.735  44.157   1
  -4  -3  -3 158.887   8.209   2
   4  -3   3 157.102   7.655   1
  -4  -3  -3 152.510   8.237   3
  -4   3  -3 154.317   7.656   1
  -4   3  -3 154.277   8.775   2
   4   3   3 163.692   8.168   1
   5  -3   3 320.378  15.437   1
  -5  -3  -3 345.908  16.676   2
  -5  -3  -3 342.247  16.212   3
  -5   3  -3 310.086  15.434   1
  -5   3  -3 329.259  17.244   2
   5   3   3 327.566  16.080   1
  -6  -3  -3 1.11683 0.93131   2
  -6  -3  -3 0.98497 1.35614   3
   6   3   3 0.82201 0.95111   1
  -6   3  -3 0.51181 1.17653   2
  -7  -3  -3 34.0376  2.9308   2
  -7  -3  -3 28.1763  3.7715   3
   7   3   3 35.8020  2.8711   1
  -7   3  -3 34.3285  3.2946   2
  -8  -3  -3 9.18296 2.65558   3
  -8  -3  -3 10.1914  1.8444   2
  -8   3  -3 14.7971  2.5812   2
  -9  -3  -3 51.6401  5.6806   3
  -9   3  -3 54.2612  4.8645   2
 -10  -3  -3 14.8910  3.5496   3
 -10   3  -3 15.5890  3.0962   2
 -11  -3  -3 31.3642  4.8569   3
 -11   3  -3 43.0005  4.8091   2
 -12  -3  -3 2.41854 2.86322   3
 -12   3  -3 4.13838 2.65737   3
 -12   3  -3 4.88606 2.65604   2
 -13  -3  -3 45.9721  6.1629   3
 -13   3  -3 37.6339  5.5840   3
 -14  -3  -3 0.81006 3.14005   3
 -14   3  -3 3.15612 3.34368   3
 -15  -4   3 5.26039 3.23061   3
 -15   4   3 0.07533 2.92152   3
 -15   4   3 -3.6522  2.8065   2
 -14  -4   3 2.46509 2.97487   3
 -14   4   3 -0.1778  2.5856   3
 -14   4   3 0.41657 2.76674   2
 -13  -4   3 5.92907 2.80397   3
 -13   4   3 -0.4223  2.5030   2
 -13   4   3 -1.3884  2.5835   3
 -12  -4   3 7.84334 3.14439   3
 -12   4   3 0.72265 2.58828   2
 -12   4   3 6.07116 2.81324   3
 -11  -4   3 7.90890 2.82800   3
 -11   4   3 10.6480  3.0423   2
 -11   4   3 13.2700  3.1221   3
 -10  -4   3 13.6926  2.4534   2
 -10  -4   3 8.14673 2.47095   3
 -10   4   3 9.68270 2.62659   2
  -9  -4   3 106.255   6.857   2
  -9  -4   3 116.906   7.097   3
  -9   4   3 114.696   7.550   2
  -8  -4   3 116.672   6.727   3
  -8  -4   3 111.669   6.625   2
  -8   4   3 105.366   7.183   2
   8   4  -3 102.445   6.074   1
  -7  -4   3 349.490  17.271   3
  -7  -4   3 351.623  18.368   2
  -7   4   3 358.144  18.934   2
   7   4  -3 366.015  17.353   1
   6  -4  -3 175.562   8.487   1
  -6  -4   3 170.283   9.455   2
  -6  -4   3 180.793   9.084   3
  -6   4   3 175.681   9.967   2
   6   4  -3 177.768   8.972   1
  -6   4   3 174.687   8.436   1
  -5  -4   3 264.308  12.980   3
  -5  -4   3 270.478  13.936   2
  -5   4   3 267.669  12.877   1
  -5   4   3 270.606  14.346   2
   5   4  -3 279.619  13.234   1
  -4  -4   3 338.323  15.995   3
  -4  -4   3 345.221  17.360   2
  -4   4   3 347.602  17.696   2
  -4   4   3 343.333  16.313   1
  -3  -4   3 329.507  16.977   2
  -3  -4   3 337.290  15.545   3
  -3   4   3 352.107  17.245   2
  -3   4   3 331.555  16.064   1
   3   4  -3 337.537  16.166   1
  -2  -4   3 18.9107  1.3775   3
  -2  -4   3 16.7304  1.5242   2
   2   4  -3 18.7418  1.5211   1
  -2   4   3 22.0827  1.6424   2
  -2   4   3 17.5417  1.4816   1
  -1  -4   3 74.0236  3.7115   3
  -1  -4   3 68.3603  4.1651   2
   1  -4  -3 72.1338  3.4688   3
   1   4  -3 73.0702  3.9461   1
  -1   4   3 70.2481  3.9844   1
   0  -4  -3 10.9537  0.8657   3
   0   4   3 10.1958  0.8956   2
   0   4  -3 13.0452  1.1725   1
   0   4   3 9.45903 1.20630   1
  -1  -4  -3 7.53960 0.93505   3
   1   4   3 5.98733 0.96169   1
  -1   4  -3 8.59133 1.00482   1
  -2  -4  -3 56.3058  3.2688   3
   2   4   3 60.4004  3.4540   1
  -2   4  -3 61.8332  3.1492   1
  -2   4  -3 44.8236  3.5259   2
  -3  -4  -3 421.252  20.028   3
  -3  -4  -3 436.444  21.192   2
  -3   4  -3 437.238  20.181   1
  -3   4  -3 422.550  21.960   2
  -4  -4  -3 59.6193  3.3008   2
  -4  -4  -3 54.2041  3.8486   3
  -4   4  -3 56.3075  3.0688   1
  -4   4  -3 56.5060  4.0573   2
   4   4   3 57.3297  3.6395   1
  -5  -4  -3 447.981  21.912   2
  -5  -4  -3 448.499  21.071   3
   5   4   3 435.595  21.233   1
  -5   4  -3 428.435  22.672   2
  -5   4  -3 434.823  20.457   1
  -6  -4  -3 189.751  10.144   3
  -6  -4  -3 185.414   9.775   2
  -6   4  -3 187.505  10.565   2
   6   4   3 177.133   9.671   1
  -7  -4  -3 160.378   8.656   2
  -7  -4  -3 165.061   9.317   3
   7   4   3 155.270   8.585   1
  -7   4  -3 151.668   9.361   2
  -8  -4  -3 142.502   8.872   3
  -8   4  -3 144.278   8.926   2
  -9  -4  -3 113.423   7.877   3
  -9   4  -3 109.921   7.651   2
 -10  -4  -3 5.49651 2.69641   3
 -10   4  -3 4.26974 2.53707   2
 -11  -4  -3 50.8995  5.7732   3
 -11   4  -3 35.8575  4.8110   2
 -12  -4  -3 -1.0032  2.6590   3
 -12   4  -3 2.78929 2.40706   2
 -13  -4  -3 2.47723 3.14877   3
 -13   4  -3 0.41035 2.97921   3
 -14  -4  -3 -3.9352  2.9872   3
 -14   4  -3 2.09629 2.89731   3
 -15  -5   3 13.3129  3.6571   3
 -15   5   3 8.30078 3.59425   3
 -15   5   3 12.9277  3.6925   2
 -14  -5   3 24.8889  4.3435   3
 -14   5   3 21.0801  4.2812   2
 -14   5   3 21.8025  4.1896   3
 -13  -5   3 36.6405  5.0784   3
 -13   5   3 38.7838  5.2286   2
 -13   5   3 41.8147  5.2004   3
 -12  -5   3 37.2548  4.7930   3
 -12   5   3 38.3889  5.0705   2
 -12   5   3 37.2157  4.6947   3
 -11  -5   3 13.4542  3.0367   3
 -11   5   3 15.5309  3.3511   2
 -10  -5   3 50.2576  4.4433   3
 -10   5   3 41.7691  4.8582   2
  -9  -5   3 86.7328  5.9234   3
  -9  -5   3 78.1254  5.4885   2
  -9   5   3 88.1572  6.4215   2
  -8  -5   3 8.58500 1.74281   2
  -8  -5   3 11.1208  2.0933   3
  -8   5   3 6.92372 2.27657   2
   8   5  -3 6.85170 1.65998   1
  -7  -5   3 -1.9737  0.9506   2
  -7  -5   3 1.05655 1.15691   3
  -7   5   3 2.24038 1.51694   2
   7   5  -3 -0.4233  1.0342   1
  -6  -5   3 7.16335 1.52814   3
  -6  -5   3 7.56283 1.36960   2
  -6   5   3 7.79043 0.91597   1
  -6   5   3 8.83462 1.98341   2
   6   5  -3 5.71900 1.32565   1
  -5  -5   3 8.75388 1.29594   2
  -5  -5   3 9.16205 1.41555   3
  -5   5   3 8.69182 1.06259   1
  -5   5   3 6.89318 1.74839   2
  -4  -5   3 138.206   7.493   2
  -4  -5   3 129.342   6.992   3
   4   5  -3 147.564   7.296   1
  -4   5   3 140.410   7.861   2
  -4   5   3 140.888   7.034   1
  -3  -5   3 288.712  14.909   2
  -3  -5   3 292.429  13.687   3
   3   5  -3 291.152  14.232   1
  -3   5   3 280.909  14.095   1
  -3   5   3 315.914  15.190   2
  -2  -5   3 12.2754  1.0828   3
  -2  -5   3 11.1455  1.3348   2
  -2   5   3 9.13360 1.24935   2
   2   5  -3 9.30991 1.24247   1
  -2   5   3 9.83529 1.22999   1
  -1  -5   3 326.851  15.118   3
   1  -5  -3 319.709  14.867   3
  -1   5   3 332.341  16.510   2
   1   5  -3 318.500  15.737   1
  -1   5   3 347.990  15.865   1
   0  -5  -3 198.464   9.167   3
   0  -5   3 200.687   9.496   3
   0   5   3 192.213  10.001   2
   0   5   3 199.500   9.907   1
   0   5  -3 203.585   9.768   1
  -1  -5  -3 472.347  21.263   3
   1   5   3 455.574  22.317   1
  -1   5  -3 476.742  22.074   1
  -2  -5  -3 558.837  24.982   3
   2   5   3 532.735  26.011   1
  -2   5  -3 533.776  27.596   2
  -2   5  -3 563.552  25.645   1
  -3  -5  -3 225.918  11.121   3
  -3   5  -3 228.523  10.948   1
  -3   5  -3 220.712  12.251   2
   3   5   3 237.448  11.517   1
  -4  -5  -3 1.38174 1.02684   3
  -4  -5  -3 1.15574 0.49727   2
   4   5   3 -0.0177  0.3710   1
  -4   5  -3 2.32060 0.61618   1
  -4   5  -3 1.06422 1.03951   2
  -5  -5  -3 55.7626  3.2626   2
  -5  -5  -3 57.7601  4.0535   3
  -5   5  -3 53.2522  2.9052   1
  -5   5  -3 59.7947  4.2497   2
   5   5   3 51.1720  3.6802   1
  -6  -5  -3 2.89407 0.90018   2
  -6  -5  -3 2.12505 1.44782   3
   6   5   3 0.85654 1.10321   1
  -6   5  -3 0.71710 1.37215   2
  -7  -5  -3 1.75418 1.60766   3
   7   5   3 -0.2788  0.9925   1
  -7   5  -3 3.97094 1.73208   2
  -8  -5  -3 0.21527 1.94084   3
  -8   5  -3 3.60706 1.74710   2
  -9  -5  -3 24.3731  3.8877   3
  -9   5  -3 24.3323  3.6425   2
 -10  -5  -3 18.7111  3.8582   3
 -10   5  -3 21.1241  3.7686   2
 -11  -5  -3 30.9096  4.6055   3
 -11   5  -3 26.4390  4.1527   2
 -12  -5  -3 12.2301  3.5460   3
 -12   5  -3 8.08699 3.07220   2
 -13  -5  -3 27.4519  4.8739   3
 -13   5  -3 25.0235  4.6215   2
 -14  -5  -3 11.5799  3.9775   3
 -14   5  -3 10.4645  3.8986   3
 -15  -6   3 1.78359 2.93269   3
 -15   6   3 -2.5139  2.7786   2
 -15   6   3 3.23977 3.13329   3
 -14  -6   3 1.88885 2.76965   3
 -14   6   3 -1.0959  2.7975   2
 -14   6   3 1.75194 2.94288   3
 -13  -6   3 3.99210 2.72783   3
 -13   6   3 -1.8890  2.6854   2
 -13   6   3 -1.7798  2.2313   3
 -12  -6   3 2.74967 2.45626   3
 -12   6   3 2.06827 2.76944   2
 -11  -6   3 4.30512 2.28719   3
 -11   6   3 -2.1786  2.2186   2
 -10  -6   3 43.8751  4.5679   3
 -10   6   3 48.4560  4.7816   2
  -9  -6   3 134.009   7.849   3
  -9  -6   3 131.471   7.704   2
  -9   6   3 119.821   8.372   2
  -8  -6   3 157.680   8.869   2
  -8  -6   3 164.732   8.843   3
   8   6  -3 159.237   8.623   1
  -8   6   3 149.223   9.539   2
  -7  -6   3 82.9962  5.3164   3
  -7  -6   3 90.4579  5.2780   2
  -7   6   3 78.1083  5.8974   2
   7   6  -3 88.4124  5.2084   1
  -6  -6   3 751.158  34.072   3
  -6  -6   3 742.322  36.837   2
  -6   6   3 733.035  37.457   2
  -6   6   3 739.274  34.489   1
  -5  -6   3 19.9251  2.1209   3
  -5  -6   3 17.6619  1.6848   2
  -5   6   3 15.2460  1.4662   1
  -5   6   3 14.3674  2.1711   2
   5   6  -3 18.7721  2.0368   1
  -4  -6   3 547.424  25.240   3
  -4  -6   3 549.112  27.447   2
  -4   6   3 543.894  25.918   1
   4   6  -3 564.740  26.191   1
  -4   6   3 547.562  27.815   2
  -3  -6   3 372.496  17.208   3
  -3  -6   3 363.890  18.763   2
   3   6  -3 377.617  17.936   1
  -3   6   3 378.830  18.992   2
  -3   6   3 365.783  17.784   1
  -2  -6   3 97.1439  5.4062   2
  -2  -6   3 92.0620  4.8747   3
  -2   6   3 87.2393  5.1020   1
  -2   6   3 107.143   5.464   2
   2   6  -3 91.1996  5.1437   1
  -1  -6   3 15.1296  1.3545   3
   1  -6  -3 14.6748  1.1622   3
  -1   6   3 16.4779  1.4695   2
  -1   6   3 14.8626  1.5994   1
   1   6  -3 17.3403  1.4894   1
   0  -6  -3 30.9966  1.8541   3
   0  -6   3 29.9131  2.1197   3
   0   6   3 31.1413  2.2704   1
   0   6  -3 31.5588  2.1163   1
   0   6   3 30.3368  1.9443   2
  -1  -6  -3 8.43385 1.05477   3
   1   6   3 9.29314 1.38202   1
  -1   6  -3 9.80718 1.14683   1
  -2  -6  -3 104.545   5.311   3
  -2   6  -3 106.577   5.265   1
  -2   6  -3 92.4425  5.9589   2
   2   6   3 97.7174  5.6031   1
  -3  -6  -3 195.212   9.674   3
   3   6   3 188.450  10.032   1
  -3   6  -3 207.978   9.522   1
  -3   6  -3 185.317  10.716   2
  -4  -6  -3 52.6147  3.6444   3
  -4   6  -3 57.0337  2.9775   1
   4   6   3 51.8718  3.6333   1
  -4   6  -3 49.4208  3.9107   2
  -5  -6  -3 458.453  22.394   2
  -5  -6  -3 450.987  21.588   3
  -5   6  -3 462.471  21.146   1
   5   6   3 442.673  22.063   1
  -5   6  -3 445.817  23.560   2
  -6  -6  -3 213.987  11.351   3
  -6  -6  -3 218.585  11.204   2
  -6   6  -3 216.203  12.200   2
   6   6   3 210.672  11.302   1
  -7  -6  -3 103.664   6.648   3
   7   6   3 101.761   6.279   1
  -7   6  -3 102.257   6.935   2
  -8  -6  -3 168.085   9.896   3
  -8   6  -3 168.589  10.270   2
  -9  -6  -3 108.945   7.587   3
  -9   6  -3 97.4574  7.4301   2
 -10  -6  -3 33.5774  4.5794   3
 -10   6  -3 31.9640  4.4872   2
 -11  -6  -3 35.2122  4.8743   3
 -11   6  -3 33.8802  4.5959   2
 -12  -6  -3 4.57913 2.92415   3
 -12   6  -3 0.44260 2.57064   2
 -13  -6  -3 2.41177 3.35045   3
 -13   6  -3 -0.7346  2.8076   2
 -14  -6  -3 -3.1454  2.9940   3
 -14   6  -3 -3.6271  2.4251   3
 -15  -7   3 2.36104 2.87993   3
 -15   7   3 6.27991 3.36962   3
 -15   7   3 3.21635 3.09574   2
 -14  -7   3 32.6797  4.9068   3
 -14   7   3 33.3516  5.1936   2
 -14   7   3 28.1850  4.6481   3
 -13  -7   3 5.64533 2.98498   3
 -13   7   3 7.21778 3.36006   2
 -12  -7   3 35.2058  4.6004   3
 -12   7   3 34.5562  4.9066   2
 -11  -7   3 4.89228 2.36884   3
 -11   7   3 5.71977 2.80391   2
 -10  -7   3 60.5381  5.0327   3
 -10   7   3 53.3549  5.2433   2
  -9  -7   3 28.7161  3.4675   3
  -9   7   3 26.8776  3.7777   2
   9   7  -3 27.0632  3.0729   1
  -8  -7   3 34.7391  3.6124   3
  -8  -7   3 34.9051  2.9915   2
   8   7  -3 36.4371  3.1592   1
  -8   7   3 38.0733  4.1720   2
  -7  -7   3 2.99377 1.37732   3
  -7  -7   3 0.15128 1.00493   2
   7   7  -3 -0.2599  1.1903   1
  -7   7   3 1.35647 1.86753   2
  -6  -7   3 32.4894  2.9038   3
  -6  -7   3 37.5488  2.7628   2
   6   7  -3 27.6196  2.7492   1
  -6   7   3 34.8439  3.4042   2
  -6   7   3 37.4699  2.3452   1
  -5  -7   3 51.2695  3.2113   2
  -5  -7   3 44.4858  3.2366   3
   5   7  -3 46.0747  3.3195   1
  -5   7   3 43.3285  3.6924   2
  -5   7   3 45.9345  2.9291   1
  -4  -7   3 197.996  10.174   2
  -4  -7   3 185.235   9.500   3
   4   7  -3 199.561   9.900   1
  -4   7   3 183.560  10.470   2
  -4   7   3 193.737   9.639   1
  -3  -7   3 568.295  27.322   2
  -3  -7   3 537.646  24.966   3
  -3   7   3 525.428  25.833   1
   3   7  -3 540.736  25.972   1
  -3   7   3 556.996  27.482   2
  -2  -7   3 92.1165  4.8456   3
   2   7  -3 92.7086  5.1281   1
  -2   7   3 95.2821  5.1162   1
  -2   7   3 87.4724  5.2703   2
   1  -7  -3 88.8506  4.5604   3
  -1  -7   3 88.8368  4.8034   3
  -1   7   3 91.9910  5.0914   1
   1   7  -3 88.9615  4.9761   1
  -1   7   3 94.5816  5.1186   2
   0  -7   3 968.736  44.136   3
   0  -7  -3 984.941  43.790   3
   0   7   3 968.842  45.880   1
   0   7   3 1000.71   47.99   2
   0   7  -3 974.240  45.684   1
  -1  -7  -3 27.1063  1.8771   3
   1   7   3 22.6306  2.0335   1
  -1   7  -3 25.2102  1.8942   1
   1   7   3 25.0360  1.5470   2
  -2  -7  -3 1593.52   69.58   3
  -2   7  -3 1504.17   76.65   2
   2   7   3 1504.98   72.44   1
  -2   7  -3 1621.86   72.02   1
  -3  -7  -3 79.0250  4.5620   3
   3   7   3 74.2657  4.7863   1
  -3   7  -3 82.1506  4.2806   1
  -3   7  -3 78.3737  5.2319   2
  -4  -7  -3 24.8355  2.3712   3
  -4   7  -3 27.4561  2.7372   2
  -4   7  -3 27.1847  1.8455   1
   4   7   3 29.3017  2.5339   1
  -5  -7  -3 0.12324 1.08128   3
   5   7   3 0.69133 0.90426   1
  -5   7  -3 -1.7675  1.1579   2
  -5   7  -3 -0.2804  0.5547   1
  -6  -7  -3 -0.1207  1.1576   3
  -6   7  -3 0.54064 1.39795   2
   6   7   3 0.59068 1.03260   1
  -7  -7  -3 2.51656 1.62594   3
  -7   7  -3 3.91582 1.90997   2
   7   7   3 -0.5518  1.1664   1
  -8  -7  -3 9.67123 2.63669   3
   8   7   3 20.0307  2.7787   1
  -8   7  -3 13.3740  2.9089   2
  -9  -7  -3 10.4473  2.9974   3
  -9   7  -3 11.5572  2.9900   2
 -10  -7  -3 38.0244  4.8508   3
 -10   7  -3 34.5396  4.7435   2
 -11  -7  -3 8.83747 3.47486   3
 -11   7  -3 11.8593  3.2857   2
 -12  -7  -3 23.9251  4.4517   3
 -12   7  -3 25.1515  4.5011   2
 -13  -7  -3 7.82894 3.66319   3
 -13   7  -3 12.5042  3.7086   2
 -14  -7  -3 28.8095  5.2834   3
 -14   7  -3 25.9406  4.8332   2
 -15  -8   3 0.65711 2.87966   3
 -15   8   3 -1.6868  3.1850   2
 -14  -8   3 -0.2702  2.4915   3
 -14   8   3 -2.0538  2.6547   2
 -14   8   3 0.57168 2.72996   3
 -13  -8   3 3.75872 2.64054   3
 -13   8   3 0.35591 2.73639   2
 -12  -8   3 -2.1322  2.2083   3
 -12   8   3 0.88931 2.60926   2
 -11  -8   3 2.43512 2.17629   3
 -11   8   3 -1.6665  2.3342   2
 -10  -8   3 60.4185  4.9532   3
 -10   8   3 59.7668  5.7249   2
  -9  -8   3 56.5082  4.5864   3
  -9   8   3 58.9896  5.2496   2
   9   8  -3 58.9413  4.4450   1
  -8  -8   3 125.254   7.395   3
   8   8  -3 123.528   7.299   1
  -8   8   3 124.637   8.177   2
  -7  -8   3 67.5098  4.3946   2
  -7  -8   3 65.4908  4.6155   3
  -7   8   3 73.7342  5.3238   2
  -6  -8   3 670.592  33.955   2
  -6  -8   3 668.171  31.521   3
  -6   8   3 687.173  34.686   2
   6   8  -3 699.355  32.615   1
  -6   8   3 683.616  31.976   1
  -5  -8   3 4.94118 1.11652   2
  -5  -8   3 2.85885 1.20731   3
  -5   8   3 2.87401 1.00714   1
   5   8  -3 2.54602 1.31033   1
  -5   8   3 4.74351 1.59845   2
  -4  -8   3 288.762  14.529   2
  -4  -8   3 274.594  13.496   3
  -4   8   3 274.797  14.826   2
   4   8  -3 283.567  14.036   1
  -4   8   3 281.757  13.789   1
  -3  -8   3 488.348  22.886   3
  -3  -8   3 499.814  24.963   2
   3   8  -3 485.888  23.803   1
  -3   8   3 495.623  23.701   1
  -3   8   3 512.938  25.151   2
  -2  -8   3 27.7437  2.1288   3
   2   8  -3 29.3422  2.3535   1
  -2   8   3 26.6953  2.3043   1
  -1  -8   3 98.9721  5.3477   3
   1  -8  -3 98.2773  5.0936   3
   1   8  -3 96.8808  5.5162   1
  -1   8   3 108.514   5.693   2
  -1   8   3 98.1370  5.6224   1
   0  -8  -3 41.1438  2.5650   3
   0  -8   3 46.0042  2.9690   3
   0   8  -3 42.0534  2.8726   1
   0   8   3 38.5863  2.9476   1
   0   8   3 45.6447  2.7364   2
  -1  -8  -3 2.31433 0.88393   3
  -1   8  -3 3.03598 0.95402   1
   1   8   3 1.86749 1.05652   1
  -1   8  -3 4.10798 1.22941   2
   1   8   3 2.19114 0.59704   2
  -2  -8  -3 178.783   8.526   3
  -2   8  -3 169.743   8.565   1
  -2   8  -3 168.268   9.619   2
   2   8   3 164.107   9.000   1
  -3  -8  -3 73.9728  4.3656   3
  -3   8  -3 71.4626  5.0021   2
  -3   8  -3 76.4653  4.1136   1
   3   8   3 71.8137  4.6761   1
  -4  -8  -3 66.6458  4.3704   3
  -4   8  -3 72.2765  3.8903   1
  -4   8  -3 74.3769  5.0542   2
   4   8   3 67.5999  4.5999   1
  -5  -8  -3 105.824   6.106   3
  -5   8  -3 100.346   6.701   2
   5   8   3 100.801   6.243   1
  -5   8  -3 100.441   5.210   1
  -6  -8  -3 216.956  11.329   3
  -6   8  -3 210.950  12.329   2
  -7  -8  -3 34.9265  3.8246   3
  -7   8  -3 34.1270  4.0162   2
   7   8   3 35.4733  3.4449   1
  -8  -8  -3 179.612  10.063   3
   8   8   3 173.877   9.846   1
  -8   8  -3 158.512  10.480   2
  -9  -8  -3 27.1639  4.0144   3
  -9   8  -3 31.1397  4.2424   2
 -10  -8  -3 38.6619  5.0131   3
 -10   8  -3 37.7826  4.8777   2
 -11  -8  -3 10.2911  3.1808   3
 -11   8  -3 3.86021 2.93989   2
 -12  -8  -3 4.04401 2.83637   3
 -12   8  -3 3.38347 3.09866   2
 -13  -8  -3 2.10298 3.05576   3
 -13   8  -3 3.45980 3.31818   2
 -14  -8  -3 -1.6120  3.2444   3
 -14   8  -3 -3.3278  3.0400   2
 -14  -9   3 27.6409  4.3585   3
 -14   9   3 23.4044  4.7244   2
 -13  -9   3 -1.1697  2.5133   3
 -13   9   3 1.81770 3.07938   2
 -12  -9   3 54.5782  5.6163   3
 -12   9   3 47.4029  5.8792   2
 -11  -9   3 7.18215 2.57511   3
 -11   9   3 2.69480 2.88086   2
 -10  -9   3 46.1949  4.7854   3
 -10   9   3 49.9729  5.1170   2
  -9  -9   3 1.96780 1.72004   3
  -9   9   3 -1.6599  2.0663   2
   9   9  -3 -2.3077  1.4039   1
  -8  -9   3 36.4422  3.7924   3
  -8   9   3 38.3353  4.2642   2
  -7  -9   3 0.15434 1.28982   3
  -7   9   3 -3.2218  1.2762   2
   7   9  -3 -1.4695  1.2643   1
  -6  -9   3 3.52184 1.39187   3
  -6  -9   3 4.87430 1.22977   2
  -6   9   3 4.72066 1.06207   1
  -6   9   3 4.81885 1.63415   2
   6   9  -3 4.67896 1.48876   1
  -5  -9   3 12.1979  1.8755   3
  -5  -9   3 14.5146  1.7240   2
  -5   9   3 12.8302  2.2706   2
  -5   9   3 12.0840  1.6496   1
   5   9  -3 11.8852  1.9628   1
  -4  -9   3 195.282  10.168   2
  -4  -9   3 186.961   9.585   3
   4   9  -3 182.316   9.916   1
  -4   9   3 189.417  10.540   2
  -4   9   3 194.692   9.745   1
  -3  -9   3 251.491  12.226   3
   3   9  -3 250.342  12.757   1
  -3   9   3 263.176  13.440   2
  -3   9   3 245.611  12.614   1
  -2  -9   3 302.050  14.519   3
   2   9  -3 302.239  15.136   1
  -2   9   3 314.051  15.173   1
   1  -9  -3 772.471  35.068   3
  -1  -9   3 767.475  35.326   3
  -1   9   3 777.494  36.782   1
   1   9  -3 753.629  36.635   1
  -1   9   3 814.154  38.502   2
   0  -9  -3 1858.76   83.74   3
   0  -9   3 1857.68   84.11   3
   0   9   3 1887.15   87.41   1
   0   9   3 1945.81   91.80   2
   0   9  -3 1854.84   87.15   1
  -1  -9  -3 471.281  20.705   3
  -1   9  -3 454.031  23.102   2
   1   9   3 427.682  22.167   2
   1   9   3 436.868  21.831   1
  -1   9  -3 456.360  21.515   1
  -2  -9  -3 835.937  36.144   3
   2   9   3 779.686  37.769   1
  -2   9  -3 784.622  37.273   1
  -2   9  -3 779.415  39.989   2
  -3  -9  -3 3.85470 1.13302   3
   3   9   3 3.40434 1.32336   1
  -3   9  -3 3.46113 1.40315   2
  -3   9  -3 4.30894 0.99784   1
  -4  -9  -3 95.9111  5.7948   3
  -4   9  -3 100.602   5.351   1
  -4   9  -3 106.757   6.738   2
   4   9   3 100.863   6.176   1
  -5  -9  -3 24.4266  2.7833   3
  -5   9  -3 28.1328  1.9632   1
   5   9   3 24.5697  2.9609   1
  -5   9  -3 24.1006  3.2447   2
  -6  -9  -3 41.7680  3.8383   3
   6   9   3 52.8050  4.0627   1
  -6   9  -3 53.2870  4.6336   2
  -7  -9  -3 2.24307 1.66385   3
  -7   9  -3 -1.1532  1.7386   2
   7   9   3 1.89066 1.48976   1
  -8  -9  -3 15.2155  2.8655   3
  -8   9  -3 13.1064  2.9235   2
   8   9   3 12.1915  2.5966   1
  -9  -9  -3 0.19770 2.04379   3
  -9   9  -3 -2.0373  2.1131   2
 -10  -9  -3 53.0377  5.5284   3
 -10   9  -3 48.9035  5.5974   2
 -11  -9  -3 1.28698 2.55384   3
 -11   9  -3 8.53922 3.16622   2
 -12  -9  -3 39.5348  5.3724   3
 -12   9  -3 38.3321  5.6099   2
 -13  -9  -3 -2.0479  2.5885   3
 -13   9  -3 3.65390 3.19862   2
 -14 -10   3 -0.8906  2.6634   3
 -14  10   3 1.28454 3.18773   2
 -13 -10   3 -4.3328  1.9988   3
 -13  10   3 3.66765 3.19585   2
 -12 -10   3 11.0331  3.0848   3
 -12  10   3 10.2253  3.3846   2
 -11 -10   3 1.64282 2.06339   3
 -11  10   3 -2.2655  2.6012   2
 -10 -10   3 67.4218  5.2723   3
 -10  10   3 57.4614  5.7611   2
  -9 -10   3 10.0166  2.3225   3
   9  10  -3 7.86445 2.29575   1
  -9  10   3 8.23847 2.87363   2
  -8 -10   3 91.8159  5.7077   3
  -8  10   3 79.2818  6.1865   2
   8  10  -3 75.3269  5.4630   1
  -7 -10   3 -0.8700  1.2990   3
   7  10  -3 1.54112 1.39088   1
  -7  10   3 -1.9223  1.5138   2
  -6 -10   3 150.122   8.227   2
  -6 -10   3 142.829   8.119   3
   6  10  -3 147.853   8.391   1
  -6  10   3 147.728   8.978   2
  -6  10   3 155.145   7.867   1
  -5 -10   3 2.31171 1.22130   3
  -5 -10   3 4.01597 1.09105   2
  -5  10   3 1.32016 1.01147   1
   5  10  -3 2.90007 1.36240   1
  -5  10   3 3.76784 1.49680   2
  -4 -10   3 141.249   7.712   3
  -4  10   3 148.053   7.821   1
  -4  10   3 148.132   8.517   2
   4  10  -3 147.004   8.086   1
  -3 -10   3 12.6233  1.7609   3
   3  10  -3 14.4109  2.0477   1
  -3  10   3 13.2775  2.0034   2
  -3  10   3 13.6269  1.8925   1
  -2 -10   3 45.1712  3.1082   3
   2  10  -3 42.5201  3.2329   1
  -2  10   3 46.1721  3.3522   1
   1 -10  -3 117.162   6.127   3
  -1 -10   3 117.901   6.377   3
   1  10  -3 124.190   6.642   1
  -1  10   3 115.425   6.620   2
  -1  10   3 118.701   6.729   1
   0 -10   3 51.2943  3.6642   3
   0 -10  -3 58.3045  3.4401   3
   0  10   3 55.1794  3.9196   1
   0  10   3 59.1582  3.5394   2
   0  10  -3 58.3580  3.7394   1
  -1 -10  -3 74.9144  4.1538   3
  -1  10  -3 75.3119  4.8916   2
   1  10   3 70.4262  4.6128   1
   1  10   3 65.9336  3.9503   2
  -1  10  -3 70.8965  4.3277   1
  -2 -10  -3 108.564   5.904   3
  -2  10  -3 103.044   6.803   2
   2  10   3 116.112   6.554   1
  -2  10  -3 110.676   6.001   1
  -3 -10  -3 2.67025 1.15858   3
  -3  10  -3 2.60721 0.99632   1
  -3  10  -3 4.57952 1.62819   2
   3  10   3 1.67947 1.18893   1
  -4 -10  -3 347.166  17.279   3
  -4  10  -3 359.722  17.310   1
   4  10   3 357.537  18.173   1
  -4  10  -3 376.124  19.399   2
  -5 -10  -3 13.6127  2.1636   3
  -5  10  -3 15.0617  1.6718   1
   5  10   3 16.4037  2.4691   1
  -5  10  -3 10.7283  2.5589   2
  -6 -10  -3 302.925  15.544   3
  -6  10  -3 315.238  17.298   2
   6  10   3 314.739  16.229   1
  -7 -10  -3 2.01020 1.72708   3
  -7  10  -3 -1.2876  2.0190   2
   7  10   3 2.50636 1.53048   1
  -8 -10  -3 138.393   8.608   3
  -8  10  -3 135.148   9.283   2
   8  10   3 146.302   8.781   1
  -9 -10  -3 -3.3112  1.8380   3
  -9  10  -3 -2.7800  2.1689   2
 -10 -10  -3 17.2573  3.5381   3
 -10  10  -3 12.9844  3.5162   2
 -11 -10  -3 -0.4701  2.2082   3
 -11  10  -3 -0.4341  2.7142   2
 -12 -10  -3 -1.5416  2.6378   3
 -12  10  -3 2.12291 3.03349   2
 -13 -10  -3 -3.3708  2.8154   3
 -13  10  -3 -0.1977  2.9751   2
 -14 -11   3 21.0282  4.0928   3
 -14  11   3 12.0462  4.1385   2
 -13 -11   3 -0.0383  2.5559   3
 -13  11   3 1.93592 2.92901   2
 -12 -11   3 45.6240  5.2733   3
 -12  11   3 41.5405  5.5101   2
 -11 -11   3 -3.4141  1.9166   3
 -11  11   3 -2.0246  2.6727   2
 -10 -11   3 44.6823  4.7213   3
 -10  11   3 42.6641  5.2967   2
  -9 -11   3 13.4318  2.6821   3
  -9  11   3 13.0156  3.2796   2
  -8 -11   3 17.8151  2.7324   3
  -8  11   3 15.3346  3.1015   2
   8  11  -3 24.8689  3.1763   1
  -7 -11   3 1.08831 1.43437   3
   7  11  -3 0.48148 1.68208   1
  -7  11   3 -0.3639  1.6902   2
  -6 -11   3 4.64571 1.62417   3
   6  11  -3 5.20116 1.81943   1
  -6  11   3 5.10693 1.32964   1
  -6  11   3 3.86016 1.70476   2
  -5 -11   3 1.55158 1.15017   3
  -5  11   3 -1.0587  0.9402   1
   5  11  -3 -0.5479  1.2710   1
  -5  11   3 -1.1653  1.4178   2
  -4 -11   3 49.9855  3.6259   3
  -4  11   3 55.2706  3.6674   1
  -4  11   3 46.2461  3.8610   2
   4  11  -3 49.1087  3.7777   1
  -3 -11   3 3.91182 1.22485   3
   3  11  -3 2.30341 1.35084   1
  -3  11   3 3.55439 1.20048   1
  -3  11   3 1.22699 1.29323   2
  -2 -11   3 569.026  26.635   3
   2 -11  -3 585.564  26.495   3
  -2  11   3 591.437  27.754   1
   2  11  -3 587.975  27.725   1
  -2  11   3 545.450  28.948   2
  -1 -11   3 54.3032  3.7084   3
   1 -11  -3 57.0654  3.5260   3
  -1  11   3 51.3477  3.6392   2
   1  11  -3 58.5417  3.8512   1
  -1  11   3 61.0825  4.0313   1
   0 -11   3 290.017  13.940   3
   0 -11  -3 283.734  13.528   3
   0  11   3 281.379  14.465   1
   0  11  -3 276.887  14.186   1
   0  11   3 290.136  14.588   2
  -1 -11  -3 8.36230 1.35545   3
  -1  11  -3 11.3972  1.9088   2
   1  11   3 8.99811 1.15830   2
   1  11   3 7.91444 1.71637   1
  -1  11  -3 9.93609 1.60584   1
  -2 -11  -3 344.387  15.809   3
  -2  11  -3 333.146  17.706   2
   2  11   3 324.005  16.715   1
  -2  11  -3 321.079  16.176   1
  -3 -11  -3 8.54162 1.64038   3
  -3  11  -3 10.3110  2.2197   2
   3  11   3 7.39331 1.84525   1
  -3  11  -3 7.07047 1.43309   1
  -4 -11  -3 188.402  10.080   3
  -4  11  -3 191.607   9.869   1
   4  11   3 203.414  10.836   1
  -4  11  -3 199.926  11.492   2
  -5 -11  -3 14.5266  2.2686   3
  -5  11  -3 13.8948  2.7744   2
   5  11   3 8.62246 2.11146   1
  -6 -11  -3 20.1178  2.7880   3
   6  11   3 25.3217  3.2661   1
  -6  11  -3 18.8143  3.3380   2
  -7 -11  -3 8.21934 2.23539   3
   7  11   3 13.6855  2.5899   1
  -7  11  -3 11.8428  3.0474   2
  -8 -11  -3 4.77203 2.16602   3
  -8  11  -3 -2.7488  1.9057   2
   8  11   3 0.82584 0.97120   1
  -9 -11  -3 -0.2644  2.0554   3
  -9  11  -3 -0.3246  2.2284   2
 -10 -11  -3 47.4041  5.2180   3
 -10  11  -3 44.2186  5.5483   2
 -11 -11  -3 -2.7734  2.3292   3
 -11  11  -3 -5.1720  2.5129   2
 -12 -11  -3 26.3192  4.5806   3
 -12  11  -3 24.3209  4.8865   2
 -13 -11  -3 -2.1548  2.5919   3
 -13  11  -3 1.36401 3.32290   2
 -14 -12   3 3.22936 2.77786   3
 -14  12   3 1.12870 3.32601   2
 -13 -12   3 2.03462 2.75152   3
 -13  12   3 1.24895 3.21829   2
 -12 -12   3 13.6068  3.4328   3
 -12  12   3 6.34014 3.56529   2
 -11 -12   3 2.13238 2.45303   3
 -11  12   3 -0.5759  2.6548   2
 -10 -12   3 56.1346  5.0018   3
 -10  12   3 48.7119  5.7421   2
  10  12  -3 54.6259  4.9172   1
  -9 -12   3 -2.2321  1.5670   3
   9  12  -3 -2.6386  1.7401   1
  -9  12   3 -2.2938  2.1430   2
  -8 -12   3 73.6688  5.2399   3
   8  12  -3 70.0869  5.4750   1
  -8  12   3 69.2363  5.8457   2
  -7 -12   3 11.9303  2.3638   3
   7  12  -3 10.0673  2.3911   1
  -7  12   3 12.6759  2.6304   2
  -6 -12   3 157.675   8.773   3
   6  12  -3 161.174   9.180   1
  -6  12   3 159.258   9.675   2
  -5 -12   3 6.78209 1.72740   3
   5  12  -3 8.44086 1.98355   1
  -5  12   3 8.68146 1.67135   1
  -5  12   3 5.93561 1.92917   2
  -4 -12   3 202.111  10.507   3
  -4  12   3 197.947  11.458   2
  -4  12   3 210.920  10.757   1
   4  12  -3 205.126  10.989   1
  -3 -12   3 18.1811  2.2531   3
   3  12  -3 19.9501  2.5518   1
  -3  12   3 19.8171  2.3801   1
  -3  12   3 19.8581  2.5675   2
   2 -12  -3 74.3725  4.5368   3
  -2 -12   3 78.5417  4.7108   3
  -2  12   3 75.9229  4.9270   2
   2  12  -3 71.2345  4.7946   1
  -2  12   3 77.7150  4.9275   1
   1 -12  -3 -0.3379  0.8946   3
  -1 -12   3 0.15172 0.97857   3
   1  12  -3 -2.1525  1.0226   1
  -1  12   3 -0.8395  0.9438   2
  -1  12   3 0.52841 1.23463   1
   0 -12   3 19.6011  2.3097   3
   0 -12  -3 19.5680  2.0565   3
   0  12   3 20.5083  1.9320   2
   0  12   3 25.5524  2.7711   1
   0  12  -3 16.5591  2.2580   1
  -1 -12  -3 19.6697  2.1429   3
  -1  12  -3 19.3957  2.2488   1
   1  12   3 17.5199  1.7358   2
  -1  12  -3 20.0351  2.7156   2
   1  12   3 18.9721  2.5489   1
  -2 -12  -3 84.6696  5.0585   3
  -2  12  -3 84.7398  5.1009   1
   2  12   3 84.2614  5.5981   1
  -2  12  -3 83.7859  5.8162   2
  -3 -12  -3 17.1699  2.2934   3
   3  12   3 18.2063  2.8213   1
  -3  12  -3 17.9765  2.1295   1
  -3  12  -3 20.2467  2.9615   2
  -4 -12  -3 290.341  14.435   3
  -4  12  -3 289.165  14.396   1
   4  12   3 292.999  15.311   1
  -4  12  -3 293.179  16.224   2
  -5 -12  -3 49.3378  3.9541   3
   5  12   3 48.1823  4.3069   1
  -5  12  -3 51.1525  4.7137   2
  -6 -12  -3 150.597   8.564   3
   6  12   3 152.566   9.047   1
  -6  12  -3 140.104   9.525   2
  -7 -12  -3 19.1749  3.0699   3
  -7  12  -3 12.8727  3.3151   2
   7  12   3 19.1247  3.1820   1
  -8 -12  -3 122.440   8.028   3
   8  12   3 130.374   8.429   1
  -8  12  -3 128.198   9.120   2
  -9 -12  -3 5.26167 2.50666   3
  -9  12  -3 0.02606 2.58832   2
 -10 -12  -3 9.97383 3.04190   3
 -10  12  -3 11.4234  3.4962   2
 -11 -12  -3 0.29619 2.33913   3
 -11  12  -3 -2.5842  2.7374   2
 -12 -12  -3 1.88358 2.68187   3
 -12  12  -3 -4.0908  2.6221   2
 -13 -12  -3 0.86076 3.18315   3
 -13  12  -3 -1.2377  3.0469   2
 -13 -13   3 3.36084 3.03898   3
 -13  13   3 4.70717 3.46707   2
 -12 -13   3 30.3666  4.4377   3
 -12  13   3 21.4212  4.5925   2
 -11 -13   3 13.2362  3.1841   3
 -11  13   3 8.04515 3.42074   2
 -10 -13   3 31.9926  4.0715   3
 -10  13   3 29.3316  4.5686   2
  10  13  -3 17.4264  3.1522   1
  -9 -13   3 17.0758  2.9558   3
   9  13  -3 9.02203 2.67812   1
  -9  13   3 8.23947 3.17085   2
  -8 -13   3 7.50574 2.19445   3
  -8  13   3 7.84304 2.70855   2
   8  13  -3 5.19344 2.17799   1
  -7 -13   3 0.57280 1.55819   3
   7  13  -3 -1.5667  1.6994   1
  -7  13   3 -1.9617  1.6867   2
  -6 -13   3 6.65730 1.81951   3
  -6  13   3 6.60771 2.22410   2
   6  13  -3 7.39369 2.17215   1
  -5 -13   3 3.25554 1.60442   3
  -5  13   3 5.50870 1.61352   1
   5  13  -3 -0.8594  1.5988   1
  -5  13   3 1.27906 1.90391   2
  -4 -13   3 109.835   6.544   3
  -4  13   3 103.805   7.116   2
   4  13  -3 121.749   7.051   1
  -4  13   3 113.811   6.677   1
  -3 -13   3 29.3438  3.0117   3
   3  13  -3 32.8459  3.0067   1
  -3  13   3 31.3504  3.2449   1
  -3  13   3 30.8912  3.3243   2
  -2 -13   3 453.754  21.412   3
   2 -13  -3 451.396  21.196   3
   2  13  -3 431.626  22.183   1
  -2  13   3 456.938  23.141   2
  -2  13   3 460.303  22.298   1
   1 -13  -3 53.6680  3.6687   3
  -1 -13   3 49.2132  3.8220   3
   1  13  -3 54.1141  4.0963   2
  -1  13   3 56.7867  3.7591   2
   1  13  -3 48.7044  3.8112   1
  -1  13   3 52.3910  4.0240   1
   0 -13   3 386.442  18.889   3
   0 -13  -3 401.601  18.553   3
   0  13   3 403.124  19.725   1
   0  13   3 391.999  19.927   2
   0  13  -3 379.725  19.384   1
  -1 -13  -3 45.8533  3.3577   3
   1  13   3 39.2191  3.6156   1
  -1  13  -3 49.1767  3.5970   1
  -1  13  -3 48.4881  4.0457   2
  -2 -13  -3 229.491  11.497   3
   2  13   3 215.409  12.282   1
  -2  13  -3 234.002  13.014   2
  -2  13  -3 237.540  11.870   1
  -3 -13  -3 1.35551 1.32075   3
  -3  13  -3 2.05927 1.87047   2
   3  13   3 -0.8349  1.5885   1
  -3  13  -3 1.03584 1.32237   1
  -4 -13  -3 129.227   7.501   3
   4  13   3 130.027   8.151   1
  -4  13  -3 137.999   8.684   2
  -4  13  -3 132.120   7.274   1
  -5 -13  -3 1.49751 1.65869   3
   5  13   3 1.60027 1.85859   1
  -5  13  -3 2.93339 2.18871   2
  -6 -13  -3 17.8077  2.9573   3
  -6  13  -3 11.0699  3.1329   2
   6  13   3 19.8719  3.1501   1
  -7 -13  -3 4.47229 2.10629   3
   7  13   3 3.87792 2.20633   1
  -7  13  -3 -2.1276  2.1986   2
  -8 -13  -3 2.04691 2.21552   3
   8  13   3 6.02643 2.22428   1
  -8  13  -3 -4.6020  1.9296   2
  -9 -13  -3 10.0027  2.7086   3
  -9  13  -3 6.45074 2.77103   2
   9  13   3 1.38409 1.34262   1
 -10 -13  -3 17.6193  3.5035   3
 -10  13  -3 23.7406  4.3116   2
 -11 -13  -3 1.81689 2.65948   3
 -11  13  -3 2.45706 3.29805   2
 -12 -13  -3 20.4124  4.1508   3
 -12  13  -3 15.4683  4.2350   2
 -13 -14   3 3.25861 3.01581   3
 -13  14   3 2.07613 3.24739   2
 -12 -14   3 -0.2742  2.5297   3
 -12  14   3 3.49896 3.30299   2
 -11 -14   3 0.95565 2.33749   3
 -11  14   3 1.04949 3.09888   2
 -10 -14   3 32.5346  4.2654   3
  10  14  -3 39.6009  4.7384   1
 -10  14   3 25.1970  4.6086   2
  -9 -14   3 4.49437 2.39478   3
  -9  14   3 0.54652 2.84970   2
   9  14  -3 1.51276 2.38264   1
  -8 -14   3 114.253   7.463   3
   8  14  -3 116.933   7.866   1
  -8  14   3 124.038   8.577   2
  -7 -14   3 15.3291  2.6802   3
  -7  14   3 9.43681 2.68568   2
   7  14  -3 13.8028  2.8709   1
  -6 -14   3 84.9613  5.5645   3
  -6  14   3 74.4158  6.0571   2
   6  14  -3 79.5342  5.8127   1
  -5 -14   3 12.3671  2.2235   3
   5  14  -3 15.1853  2.6933   1
  -5  14   3 12.2999  2.6818   2
  -5  14   3 19.1401  2.5001   1
  -4 -14   3 152.470   8.750   3
  -4  14   3 169.143   9.082   1
  -4  14   3 166.622   9.666   2
   4  14  -3 151.701   9.135   1
  -3 -14   3 35.9012  3.1823   3
   3  14  -3 35.3835  3.7174   1
  -3  14   3 22.7163  3.1273   2
  -3  14   3 34.8400  3.5269   1
  -2 -14   3 62.7128  4.3172   3
   2  14  -3 60.0112  4.3782   2
  -2  14   3 62.8976  4.5093   1
   2  14  -3 57.8653  4.4609   1
  -2  14   3 57.8611  4.3750   2
  -1 -14   3 20.4974  2.5911   3
   1 -14  -3 22.1028  2.5035   3
   1  14  -3 20.2955  2.7109   1
  -1  14   3 24.4399  2.5386   2
  -1  14   3 17.4776  2.7009   1
   1  14  -3 26.7704  2.9534   2
   0 -14   3 3.00866 1.46424   3
   0 -14  -3 2.40781 1.24295   3
   0  14   3 4.10026 1.26735   2
   0  14  -3 1.96231 1.54193   1
   0  14  -3 0.96382 1.45371   2
   0  14   3 2.40501 1.68519   1
  -1 -14  -3 -0.5568  1.0617   3
   1  14   3 -0.9862  1.4083   1
  -1  14  -3 0.19882 1.51024   2
  -1  14  -3 0.66514 1.38202   1
  -2 -14  -3 69.1596  4.7198   3
  -2  14  -3 73.3707  4.8112   1
  -2  14  -3 74.4170  5.4955   2
   2  14   3 75.4598  5.3878   1
  -3 -14  -3 0.24883 1.24617   3
  -3  14  -3 1.85880 1.83136   2
  -3  14  -3 0.68809 1.30653   1
   3  14   3 1.31105 1.78191   1
  -4 -14  -3 89.4531  5.7335   3
  -4  14  -3 94.4102  5.5342   1
   4  14   3 83.5286  6.3012   1
  -4  14  -3 92.7778  6.7042   2
  -5 -14  -3 25.7402  3.3028   3
  -5  14  -3 24.5214  3.8157   2
   5  14   3 30.9152  3.9347   1
  -6 -14  -3 186.632  10.489   3
   6  14   3 200.444  11.361   1
  -6  14  -3 182.738  11.854   2
  -7 -14  -3 58.4713  5.0424   3
   7  14   3 53.1376  5.6320   1
  -7  14  -3 56.3024  5.7513   2
  -8 -14  -3 36.2913  4.3511   3
   8  14   3 41.8383  4.9911   1
  -8  14  -3 44.0699  5.3750   2
  -9 -14  -3 11.0596  2.9443   3
  -9  14  -3 4.24132 3.02498   2
   9  14   3 3.70667 2.52057   1
 -10 -14  -3 20.0165  3.7818   3
 -10  14  -3 20.0271  4.3228   2
 -11 -14  -3 0.86634 2.49282   3
 -11  14  -3 5.43263 3.50429   2
 -12 -14  -3 1.37194 2.84862   3
 -12  14  -3 0.65337 3.31460   2
 -13 -15   3 1.84458 2.69666   3
 -13  15   3 -0.2843  3.1042   2
 -12 -15   3 8.72009 3.17936   3
 -12  15   3 5.83695 3.67213   2
 -11 -15   3 10.6973  3.1135   3
 -11  15   3 10.8825  3.5383   2
 -10 -15   3 13.7293  3.1021   3
 -10  15   3 18.1369  4.1641   2
  10  15  -3 10.5857  3.0607   1
  -9 -15   3 11.4491  3.0086   3
  -9  15   3 9.89411 3.47000   2
   9  15  -3 14.0061  3.4204   1
  -8 -15   3 0.67594 1.91335   3
  -8  15   3 1.57176 2.65092   2
   8  15  -3 0.26658 2.16307   1
  -7 -15   3 3.55833 1.90139   3
   7  15  -3 0.39144 2.20252   1
  -7  15   3 2.14757 2.26931   2
  -6 -15   3 5.20585 1.86119   3
  -6  15   3 2.12072 2.08991   2
   6  15  -3 2.04530 2.10369   1
  -5 -15   3 5.85191 1.87666   3
   5  15  -3 6.05529 1.93299   1
  -5  15   3 1.85039 2.04938   2
  -5  15   3 -1.4113  1.5785   1
  -4 -15   3 37.9798  3.4086   3
  -4  15   3 31.0693  3.8436   2
   4  15  -3 30.7326  3.6682   1
  -4  15   3 31.8591  3.6285   1
  -3 -15   3 120.411   7.039   3
   3  15  -3 109.074   7.181   1
  -3  15   3 124.489   7.381   1
  -2 -15   3 95.3271  5.9086   3
  -2  15   3 92.5444  6.0344   2
  -2  15   3 100.402   6.265   1
   2  15  -3 82.7066  6.0282   1
   2  15  -3 97.2916  6.1163   2
  -1 -15   3 58.3218  4.4345   3
   1 -15  -3 63.1365  4.3171   3
  -1  15   3 60.6503  4.2976   2
   1  15  -3 60.1841  4.6218   1
  -1  15   3 64.3984  4.7884   1
   1  15  -3 64.6123  4.6700   2
   0 -15  -3 161.364   8.405   3
   0 -15   3 152.623   8.653   3
   0  15  -3 153.383   8.832   1
   0  15  -3 160.088   9.375   2
   0  15   3 148.676   9.039   1
  -1 -15  -3 13.1643  2.0709   3
   1  15   3 11.3130  2.4157   1
  -1  15  -3 14.1397  2.3356   1
  -1  15  -3 10.4887  2.3987   2
  -2 -15  -3 142.475   7.973   3
  -2  15  -3 147.849   8.269   1
   2  15   3 138.433   8.734   1
  -2  15  -3 152.190   9.207   2
  -3 -15  -3 34.9633  3.1512   3
   3  15   3 30.1743  3.8101   1
  -3  15  -3 25.9969  3.7455   2
  -3  15  -3 28.7151  3.0824   1
  -4 -15  -3 97.3233  6.2041   3
  -4  15  -3 104.484   6.039   1
   4  15   3 88.6565  6.6604   1
  -4  15  -3 96.9566  7.1750   2
  -5 -15  -3 0.22431 1.81326   3
   5  15   3 -0.0373  2.0310   1
  -5  15  -3 0.74487 2.34039   2
  -6 -15  -3 -0.8064  1.7956   3
  -6  15  -3 -0.0350  2.2842   2
   6  15   3 2.89515 2.21795   1
  -7 -15  -3 7.93697 2.44297   3
  -7  15  -3 3.02555 2.65153   2
   7  15   3 11.7645  3.0125   1
  -8 -15  -3 -1.5764  1.9055   3
  -8  15  -3 -3.1259  2.2403   2
   8  15   3 0.26690 2.19258   1
  -9 -15  -3 7.27263 2.87290   3
   9  15   3 2.29306 2.76429   1
  -9  15  -3 5.77839 3.07073   2
 -10 -15  -3 11.3398  3.2048   3
 -10  15  -3 8.89978 3.72724   2
 -11 -15  -3 11.2479  3.6026   3
 -11  15  -3 10.7095  3.7913   2
 -12 -15  -3 12.2426  3.9123   3
 -12  15  -3 3.99050 3.87694   2
 -12 -16   3 1.88793 2.58492   3
 -12  16   3 2.44008 3.29898   2
 -11 -16   3 5.21288 2.65719   3
 -11  16   3 -0.3424  2.9968   2
 -10 -16   3 12.0272  3.0292   3
  10  16  -3 10.0719  3.3224   1
 -10  16   3 7.25164 3.36828   2
  -9 -16   3 13.4219  3.1957   3
   9  16  -3 14.9040  3.5131   1
  -9  16   3 10.8543  3.6342   2
  -8 -16   3 50.7530  5.1923   3
   8  16  -3 63.5735  5.6860   1
  -8  16   3 51.4262  5.8185   2
  -7 -16   3 39.9663  4.3210   3
   7  16  -3 42.1811  4.7822   1
  -7  16   3 36.6550  4.7131   2
  -6 -16   3 26.5850  3.4112   3
  -6  16   3 21.3656  3.6097   2
   6  16  -3 23.3035  3.6107   1
  -5 -16   3 15.6648  2.6103   3
  -5  16   3 8.68767 2.76418   2
  -5  16   3 19.2938  2.9472   1
   5  16  -3 16.2025  3.0212   1
  -4 -16   3 70.3412  5.0859   3
  -4  16   3 71.9824  5.3375   1
  -4  16   3 67.0147  5.6130   2
   4  16  -3 69.1449  5.4374   1
  -3 -16   3 29.4358  3.3522   3
  -3  16   3 26.6986  3.6197   1
   3  16  -3 41.0501  3.8168   1
  -2 -16   3 1.61584 1.49923   3
  -2  16   3 -0.3204  1.4741   2
   2  16  -3 1.70827 1.80700   1
  -2  16   3 -0.6580  1.5616   1
   1 -16  -3 40.6762  3.2277   3
  -1 -16   3 27.4785  3.2532   3
  -1  16   3 26.8484  3.0043   2
  -1  16   3 32.4740  3.6773   1
   1  16  -3 25.8881  3.2879   2
   1  16  -3 25.6989  3.3872   1
   0 -16  -3 13.9380  2.1240   3
   0 -16   3 8.65506 2.10873   3
   0  16  -3 12.2997  2.5226   1
   0  16   3 12.7033  2.5690   1
   0  16  -3 12.6440  2.4051   2
  -1 -16  -3 27.4914  2.9567   3
  -1  16  -3 23.3267  3.3535   2
   1  16   3 23.5360  3.2352   1
  -1  16  -3 26.6781  3.2111   1
  -2 -16  -3 9.20419 2.06562   3
  -2  16  -3 11.4150  2.7215   2
  -2  16  -3 9.43506 2.04595   1
   2  16   3 6.13996 2.42846   1
  -3 -16  -3 19.3059  2.7401   3
  -3  16  -3 17.6883  2.5938   1
  -3  16  -3 13.1385  2.8694   2
   3  16   3 10.9168  2.8103   1
  -4 -16  -3 23.0295  3.1676   3
  -4  16  -3 24.7660  3.0390   1
  -4  16  -3 28.1641  4.0199   2
   4  16   3 24.1422  3.8156   1
  -5 -16  -3 77.1767  5.6736   3
   5  16   3 73.5359  6.1348   1
  -5  16  -3 75.3701  6.4463   2
  -6 -16  -3 52.6562  4.5613   3
   6  16   3 51.4157  5.6480   1
  -6  16  -3 45.7735  5.5375   2
  -7 -16  -3 32.5616  4.0936   3
  -7  16  -3 28.8910  4.6915   2
   7  16   3 50.2037  5.5173   1
  -8 -16  -3 18.8793  3.4049   3
   8  16   3 17.3333  3.7591   1
  -8  16  -3 21.4443  4.2462   2
  -9 -16  -3 16.8730  3.5182   3
   9  16   3 22.1280  4.2206   1
  -9  16  -3 14.6576  4.0128   2
 -10 -16  -3 14.0677  3.5768   3
 -10  16  -3 7.53903 3.73407   2
 -11 -16  -3 6.33769 3.16897   3
 -11  16  -3 10.0502  4.1677   2
 -12 -17   3 4.60300 3.08830   3
 -12  17   3 7.43442 3.90852   2
 -11 -17   3 9.15493 3.23677   3
 -11  17   3 13.8998  3.9819   2
 -10 -17   3 -1.9940  2.0862   3
  10  17  -3 5.67257 2.99509   1
 -10  17   3 2.48461 3.01004   2
  -9 -17   3 15.3771  3.3197   3
  -9  17   3 17.6499  4.0969   2
   9  17  -3 16.7447  3.6747   1
  -8 -17   3 0.35867 2.12064   3
  -8  17   3 4.99211 3.14178   2
   8  17  -3 0.62270 2.63337   1
  -7 -17   3 3.78627 2.30303   3
   7  17  -3 2.72409 2.71145   1
  -7  17   3 1.47824 2.44422   2
  -6 -17   3 12.4816  2.8358   3
  -6  17   3 13.6463  3.1626   2
   6  17  -3 12.3523  3.3674   1
  -5 -17   3 7.33231 2.26954   3
  -5  17   3 7.95753 2.64806   2
  -5  17   3 7.38061 2.37352   1
   5  17  -3 10.2972  2.8482   1
  -4 -17   3 14.7638  2.6526   3
  -4  17   3 15.5610  2.9664   1
   4  17  -3 9.43927 2.62527   1
  -4  17   3 9.82414 2.83751   2
  -3 -17   3 149.013   8.697   3
  -3  17   3 143.232   9.082   2
   3  17  -3 147.256   9.092   1
  -3  17   3 158.270   9.087   1
  -2 -17   3 35.7032  3.7964   3
   2  17  -3 31.6453  3.8597   1
  -2  17   3 36.2842  4.0625   1
  -2  17   3 32.8021  3.3990   2
   1 -17  -3 79.4932  5.3481   3
  -1 -17   3 69.7154  5.3825   3
   1  17  -3 69.1135  5.5775   1
   1  17  -3 86.5550  5.8548   2
  -1  17   3 89.1155  6.1330   1
   0 -17  -3 54.6026  4.4486   3
   0 -17   3 64.0438  4.9837   3
   0  17  -3 74.9422  5.4862   2
   0  17   3 65.9526  5.2330   1
   0  17  -3 70.5553  5.2128   1
  -1 -17  -3 96.7077  5.9372   3
  -1  17  -3 89.4661  6.3066   1
   1  17   3 90.5438  6.6027   1
  -2 -17  -3 67.1924  4.9255   3
  -2  17  -3 71.9431  5.8584   2
   2  17   3 65.1456  5.6200   1
  -2  17  -3 71.1331  5.0253   1
  -3 -17  -3 45.1790  4.0089   3
  -3  17  -3 38.3138  3.8895   1
   3  17   3 52.7888  4.8567   1
  -3  17  -3 54.1177  4.9927   2
  -4 -17  -3 15.3277  2.7936   3
  -4  17  -3 16.5274  3.0051   1
   4  17   3 12.3521  2.9355   1
  -4  17  -3 13.1018  3.2559   2
  -5 -17  -3 -0.3171  1.9846   3
  -5  17  -3 3.74437 2.49093   2
   5  17   3 -0.2066  2.3136   1
  -6 -17  -3 1.86861 2.15957   3
   6  17   3 0.82612 2.42288   1
  -6  17  -3 -1.5486  2.2937   2
  -7 -17  -3 1.56774 2.18696   3
  -7  17  -3 1.16516 2.55928   2
   7  17   3 -0.0297  2.2830   1
  -8 -17  -3 0.43321 2.20941   3
  -8  17  -3 1.00120 2.84228   2
   8  17   3 1.94203 2.62098   1
  -9 -17  -3 6.22821 3.00623   3
  -9  17  -3 6.66867 3.36648   2
   9  17   3 8.14133 3.24782   1
 -10 -17  -3 -1.9749  2.5614   3
 -10  17  -3 -0.7806  3.0414   2
 -11 -17  -3 6.92457 3.37977   3
 -11  17  -3 15.6194  4.6815   2
 -12 -18   3 0.40353 2.93382   3
 -12  18   3 -3.2752  3.0048   2
 -11 -18   3 7.19905 3.07297   3
 -11  18   3 0.79507 3.46709   2
 -10 -18   3 1.76816 2.50331   3
 -10  18   3 1.75301 3.18112   2
  10  18  -3 0.59882 2.96145   1
  -9 -18   3 24.0948  3.9527   3
   9  18  -3 29.8899  4.6337   1
  -9  18   3 27.7294  4.8083   2
  -8 -18   3 12.0016  3.0837   3
  -8  18   3 14.5702  3.7215   2
   8  18  -3 16.1483  3.7059   1
  -7 -18   3 44.3249  4.8859   3
  -7  18   3 48.2528  5.4845   2
   7  18  -3 48.9376  5.5548   1
  -6 -18   3 15.8980  3.1996   3
   6  18  -3 20.7434  3.6250   1
  -6  18   3 14.9233  3.4054   2
  -5 -18   3 82.7089  6.1390   3
   5  18  -3 81.2625  6.4912   1
  -5  18   3 83.6659  6.5800   2
  -4 -18   3 36.0586  4.0361   3
   4  18  -3 30.1145  4.1015   1
  -4  18   3 33.6968  4.0576   1
  -4  18   3 38.4325  4.2774   2
  -3 -18   3 29.8748  3.7231   3
  -3  18   3 42.9438  4.4259   1
   3  18  -3 26.9978  3.8139   1
  -3  18   3 29.7503  3.7223   2
  -2 -18   3 -2.7847  1.5972   3
   2  18  -3 0.47598 2.07143   1
  -2  18   3 -0.3047  1.9112   1
  -1 -18   3 14.9086  2.7793   3
   1 -18  -3 14.3225  2.5249   3
   1  18  -3 10.9730  2.9255   1
  -1  18   3 19.8206  3.2324   1
   0 -18  -3 0.49576 1.70009   3
   0 -18   3 4.25587 2.03417   3
   0  18   3 3.79076 2.17929   1
   0  18  -3 5.43207 2.38815   2
   0  18  -3 2.51703 2.45466   1
  -1 -18  -3 17.2321  2.7242   3
   1  18   3 16.1808  3.2255   1
  -1  18  -3 10.9801  2.7456   1
  -2 -18  -3 -0.5375  1.7170   3
  -2  18  -3 0.19652 2.16321   2
   2  18   3 -3.2246  1.9059   1
  -2  18  -3 -1.4619  1.8966   1
  -3 -18  -3 28.6214  3.6015   3
  -3  18  -3 30.8424  3.5801   1
  -3  18  -3 32.7824  4.3572   2
   3  18   3 29.0469  4.1993   1
  -4 -18  -3 39.5529  4.1023   3
   4  18   3 25.8021  4.2403   1
  -4  18  -3 31.6847  4.4403   2
  -5 -18  -3 76.5280  5.9498   3
   5  18   3 81.0163  6.6500   1
  -5  18  -3 82.2431  6.8174   2
  -6 -18  -3 10.1239  2.6494   3
   6  18   3 10.4683  3.2809   1
  -6  18  -3 5.51315 3.10273   2
  -7 -18  -3 32.9995  4.1636   3
   7  18   3 28.7850  4.6661   1
  -7  18  -3 30.4688  4.9844   2
  -8 -18  -3 12.4483  3.1389   3
   8  18   3 9.41855 3.71412   1
  -8  18  -3 9.37745 3.50903   2
  -9 -18  -3 13.1781  3.4317   3
  -9  18  -3 16.9952  4.4647   2
   9  18   3 16.1638  4.3095   1
 -10 -18  -3 6.77879 3.20333   3
 -10  18  -3 6.49299 3.81400   2
 -11 -18  -3 6.28843 3.45244   3
 -11  18  -3 3.88411 3.78593   2
 -11 -19   3 5.86825 3.03961   3
 -11  19   3 9.41473 3.95482   2
  11  19  -3 5.51422 3.82991   1
 -10 -19   3 -0.5742  2.5226   3
 -10  19   3 -2.6121  2.6875   2
  10  19  -3 0.94542 2.86873   1
  -9 -19   3 9.62118 3.03943   3
   9  19  -3 7.87739 3.16779   1
  -9  19   3 2.59273 3.20953   2
  -8 -19   3 -4.3965  1.9846   3
   8  19  -3 1.78926 2.78921   1
  -8  19   3 0.15030 2.88394   2
  -7 -19   3 0.59940 2.07507   3
   7  19  -3 -3.1266  2.2437   1
  -7  19   3 1.75646 2.57760   2
  -6 -19   3 3.23315 2.44501   3
  -6  19   3 -2.8937  2.2188   2
   6  19  -3 -0.3676  2.5225   1
  -5 -19   3 23.1186  3.5062   3
  -5  19   3 16.9404  3.4180   2
   5  19  -3 17.2206  3.2954   1
  -4 -19   3 13.8930  2.8979   3
   4  19  -3 9.66005 2.75014   1
  -4  19   3 12.2033  2.9343   2
  -4  19   3 21.4411  3.3559   1
  -3 -19   3 25.5409  3.4939   3
  -3  19   3 27.6815  3.7551   2
  -3  19   3 32.9468  4.1165   1
   3  19  -3 32.1217  4.1129   1
  -2 -19   3 30.7024  3.7592   3
  -2  19   3 28.7990  3.9868   1
   2  19  -3 28.3075  4.0001   1
  -1 -19   3 67.3291  5.1990   3
   1 -19  -3 58.6241  4.7096   3
   1  19  -3 58.2994  5.2798   1
  -1  19   3 63.9924  5.4368   1
   0 -19   3 38.2305  4.2904   3
   0 -19  -3 40.0501  4.1780   3
   0  19  -3 57.8199  4.7615   1
   0  19   3 37.7354  4.6374   1
   0  19  -3 41.8738  4.8253   2
  -1 -19  -3 100.115   6.357   3
   1  19   3 103.575   7.192   1
  -1  19  -3 82.2369  6.7494   2
  -1  19  -3 96.8349  6.8180   1
  -2 -19  -3 -2.3809  1.6195   3
  -2  19  -3 -3.6536  1.8727   2
  -2  19  -3 -1.9274  1.6974   1
   2  19   3 -3.5276  1.8899   1
  -3 -19  -3 24.5069  3.4616   3
  -3  19  -3 29.1416  4.2393   2
   3  19   3 26.6548  4.1548   1
  -3  19  -3 26.8972  3.6084   1
  -4 -19  -3 0.82942 2.10051   3
  -4  19  -3 1.82944 2.66364   2
   4  19   3 -3.3661  2.1145   1
  -5 -19  -3 10.3088  2.7658   3
  -5  19  -3 7.68817 2.97043   2
   5  19   3 12.4280  3.3848   1
  -6 -19  -3 2.81791 2.32496   3
   6  19   3 4.26016 2.83385   1
  -6  19  -3 0.97251 2.82015   2
  -7 -19  -3 0.43166 2.30340   3
  -7  19  -3 -2.1140  2.5450   2
   7  19   3 2.13733 2.91977   1
  -8 -19  -3 -0.1731  2.2531   3
   8  19   3 0.08679 2.88689   1
  -8  19  -3 0.43915 2.90633   2
  -9 -19  -3 2.36262 2.74324   3
  -9  19  -3 7.52424 3.68815   2
   9  19   3 1.89389 3.42308   1
 -10 -19  -3 2.26226 2.98886   3
 -10  19  -3 2.20507 3.60376   2
 -11 -20   3 6.49657 3.04647   3
 -11  20   3 -0.8422  3.2472   2
  11  20  -3 3.50397 3.39104   1
 -10 -20   3 -3.0682  2.3946   3
 -10  20   3 -1.8248  2.9627   2
  10  20  -3 -2.3970  2.8856   1
  -9 -20   3 13.7859  3.4622   3
   9  20  -3 16.1815  4.1326   1
  -9  20   3 16.5624  4.2128   2
  -8 -20   3 3.43129 2.69881   3
  -8  20   3 4.55652 3.42971   2
   8  20  -3 2.43337 2.94275   1
  -7 -20   3 32.5009  4.2566   3
   7  20  -3 24.2909  4.2497   1
  -7  20   3 30.7870  4.7364   2
  -6 -20   3 1.53579 2.22156   3
  -6  20   3 -1.8973  2.1750   2
   6  20  -3 -3.5252  2.1086   1
  -5 -20   3 32.5721  4.2981   3
   5  20  -3 39.2629  4.9455   1
  -5  20   3 30.0719  4.3587   2
  -4 -20   3 0.08864 2.17568   3
  -4  20   3 0.48451 1.25075   2
   4  20  -3 4.24359 2.58765   1
  -4  20   3 4.85406 2.66247   1
  -3 -20   3 35.1479  4.3417   3
  -3  20   3 41.9244  4.7652   1
   3  20  -3 40.9918  4.9125   1
  -2 -20   3 0.60282 2.06848   3
  -2  20   3 -1.4059  2.2223   1
   2  20  -3 -0.7089  2.2891   1
  -1 -20   3 0.55238 2.10334   3
   1 -20  -3 -0.0729  1.8452   3
   1  20  -3 2.12720 2.32010   1
  -1  20   3 1.72785 2.38394   1
   0 -20  -3 2.62811 1.97379   3
   0  20   3 -1.3546  2.1802   1
   0  20  -3 -1.5607  2.1127   1
  -1 -20  -3 3.61742 2.07403   3
   1  20   3 4.46582 2.66738   1
  -1  20  -3 1.81847 2.34456   1
  -1  20  -3 1.89623 2.24845   2
  -2 -20  -3 -0.3356  1.7227   3
   2  20   3 -3.9872  2.0007   1
  -2  20  -3 -2.9489  1.8561   1
  -2  20  -3 -0.9045  2.1458   2
  -3 -20  -3 16.8951  3.1013   3
  -3  20  -3 21.6060  3.8068   2
  -3  20  -3 17.8634  3.1944   1
   3  20   3 16.9738  3.5952   1
  -4 -20  -3 2.43863 2.06550   3
  -4  20  -3 1.81874 2.41846   2
   4  20   3 3.21236 2.60399   1
  -5 -20  -3 58.6000  5.1381   3
  -5  20  -3 54.0625  6.2347   2
   5  20   3 51.5210  6.0133   1
  -6 -20  -3 2.11929 2.22754   3
  -6  20  -3 1.00916 2.97476   2
   6  20   3 5.25559 3.11705   1
  -7 -20  -3 26.4267  3.9727   3
  -7  20  -3 27.8024  4.9258   2
   7  20   3 25.7108  4.8980   1
  -8 -20  -3 1.97498 2.51658   3
  -8  20  -3 2.99283 3.31626   2
   8  20   3 1.00822 3.16455   1
  -9 -20  -3 11.9625  3.4337   3
   9  20   3 19.4305  4.6570   1
  -9  20  -3 9.54853 4.04765   2
 -10 -20  -3 0.50783 2.89909   3
  10  20   3 -2.2112  4.0342   1
 -10  20  -3 -0.3868  3.8119   2
 -10 -21   3 -1.1756  2.7763   3
 -10  21   3 2.52200 3.69387   2
  10  21  -3 3.50037 3.44210   1
  -9 -21   3 5.29555 2.91517   3
  -9  21   3 4.28316 3.43265   2
   9  21  -3 13.3738  3.8926   1
  -8 -21   3 1.63721 2.56787   3
   8  21  -3 3.03759 3.12224   1
  -8  21   3 -2.6879  2.6468   2
  -7 -21   3 2.12092 2.37427   3
  -7  21   3 -2.2339  2.5631   2
   7  21  -3 -0.6531  2.7307   1
  -6 -21   3 -3.7767  1.9268   3
   6  21  -3 2.52101 2.82042   1
  -6  21   3 1.27100 2.77730   2
  -5 -21   3 0.07370 2.32136   3
  -5  21   3 2.59566 2.51610   2
   5  21  -3 5.62054 2.94476   1
  -4 -21   3 3.00713 2.31750   3
  -4  21   3 -1.2660  2.4341   1
   4  21  -3 0.23414 2.51092   1
  -3 -21   3 24.9953  3.7135   3
   3  21  -3 20.6065  3.9374   1
  -3  21   3 29.1541  4.3246   1
  -2 -21   3 2.39603 2.29801   3
  -2  21   3 0.44549 2.30105   1
   1 -21  -3 76.6273  5.8592   3
  -1 -21   3 81.9714  6.1429   3
   1  21  -3 73.1618  6.4690   1
  -1  21   3 83.8703  6.7590   1
   0 -21  -3 0.47290 1.83575   3
   0  21  -3 5.44388 2.52708   1
   0  21   3 14.8006  3.2801   1
  -1 -21  -3 40.4464  4.4066   3
   1  21   3 37.1793  4.8412   1
  -1  21  -3 35.8387  4.5117   1
  -2 -21  -3 0.04047 2.08680   3
  -2  21  -3 2.10168 2.50318   1
   2  21   3 0.70286 2.36589   1
  -2  21  -3 1.30514 2.04500   2
  -3 -21  -3 46.3343  4.8751   3
  -3  21  -3 51.9533  4.9554   1
  -3  21  -3 49.1147  5.6303   2
   3  21   3 43.3659  5.4028   1
  -4 -21  -3 0.06326 2.21326   3
   4  21   3 1.16070 2.55369   1
  -4  21  -3 12.7675  3.5576   2
  -5 -21  -3 5.01333 2.60592   3
   5  21   3 2.55229 2.91151   1
  -5  21  -3 1.91838 2.93642   2
  -6 -21  -3 -1.6833  2.3345   3
   6  21   3 2.19199 3.05494   1
  -6  21  -3 0.98016 3.13408   2
  -7 -21  -3 -0.3739  2.3855   3
  -7  21  -3 -4.7828  2.8199   2
   7  21   3 -0.4215  2.9978   1
  -8 -21  -3 -2.0352  2.5564   3
   8  21   3 6.41580 3.57886   1
  -8  21  -3 -0.2913  3.2044   2
  -9 -21  -3 4.24471 2.99477   3
  -9  21  -3 5.09466 4.05004   2
   9  21   3 0.92561 3.51226   1
  -9 -22   3 6.89880 3.04498   3
  -9  22   3 6.32340 3.67977   2
   9  22  -3 8.21792 3.93918   1
  -8 -22   3 1.11546 2.52863   3
  -8  22   3 -0.4292  2.8152   2
   8  22  -3 -3.7991  2.8186   1
  -7 -22   3 21.1735  4.0521   3
  -7  22   3 29.3109  4.9663   2
   7  22  -3 24.8094  4.7154   1
  -6 -22   3 0.98882 2.55939   3
  -6  22   3 -0.7098  2.6151   2
   6  22  -3 -0.8415  2.8551   1
  -5 -22   3 22.7955  3.8291   3
  -5  22   3 27.4503  4.3478   2
   5  22  -3 25.2145  4.2975   1
  -4 -22   3 1.44007 2.26163   3
  -4  22   3 -3.3383  2.4599   1
   4  22  -3 1.70696 2.61736   1
  -3 -22   3 22.0339  3.6349   3
   3  22  -3 22.6040  4.1023   1
  -3  22   3 25.3219  4.0722   1
  -2 -22   3 1.73194 2.32794   3
   2  22  -3 1.76544 2.76361   1
  -2  22   3 4.07174 3.04479   1
  -1 -22   3 -1.6723  2.0593   3
   1 -22  -3 1.99259 2.28033   3
  -1  22   3 1.15277 2.55257   1
   1  22  -3 -0.2147  2.7653   1
   0 -22  -3 0.66117 2.20628   3
   0  22  -3 -1.9023  2.2255   1
   0  22   3 -4.2627  2.2621   1
  -1 -22  -3 2.84700 2.24220   3
  -1  22  -3 -2.0578  2.2964   1
   1  22   3 -1.7198  2.5100   1
  -2 -22  -3 0.52436 2.17963   3
   2  22   3 -1.0189  2.7109   1
  -2  22  -3 1.45539 2.63627   1
  -3 -22  -3 16.5324  3.3374   3
   3  22   3 21.4578  4.1735   1
  -3  22  -3 24.2923  4.1790   2
  -4 -22  -3 0.61136 2.35692   3
  -4  22  -3 -2.1520  2.4124   2
   4  22   3 2.56454 2.86038   1
  -5 -22  -3 26.3993  4.0849   3
   5  22   3 26.0603  4.7795   1
  -5  22  -3 23.8330  4.6988   2
  -6 -22  -3 -1.4158  2.0616   3
  -6  22  -3 -5.5852  2.8224   2
   6  22   3 -3.4644  2.8254   1
  -7 -22  -3 16.6400  3.5073   3
  -7  22  -3 9.69761 4.19100   2
   7  22   3 11.3934  4.1000   1
  -8 -22  -3 -0.0120  2.5882   3
   8  22   3 1.09281 3.23162   1
  -8  22  -3 -4.7373  3.2847   2
  -9 -23   3 -0.9020  2.5116   3
  -9  23   3 6.19412 3.89199   2
   9  23  -3 -0.3643  3.1697   1
  -8 -23   3 -2.4322  2.3996   3
  -8  23   3 1.74196 3.29479   2
   8  23  -3 0.03284 3.20142   1
  -7 -23   3 -1.4032  2.5639   3
  -7  23   3 1.91221 3.10009   2
   7  23  -3 -3.3762  2.8081   1
  -6 -23   3 -2.2052  2.3165   3
  -6  23   3 0.31806 2.94355   2
   6  23  -3 -1.7671  2.9057   1
  -5 -23   3 3.21878 2.47072   3
   5  23  -3 1.86871 2.85970   1
  -4 -23   3 2.13790 2.45171   3
   4  23  -3 -3.5399  2.6886   1
  -3 -23   3 20.8408  3.8586   3
   3  23  -3 14.3820  3.7671   1
  -3  23   3 24.6691  4.1076   1
  -2 -23   3 8.80561 3.01101   3
   2  23  -3 11.7708  3.4122   1
  -2  23   3 3.60363 2.84104   1
  -1 -23   3 33.8736  4.5811   3
  -1  23   3 36.6946  5.1644   1
   1  23  -3 36.6823  4.9665   1
   0 -23  -3 7.22191 2.80308   3
   0  23   3 2.25660 2.81657   1
   0  23  -3 11.2204  3.2979   1
  -1 -23  -3 37.2163  4.6029   3
  -1  23  -3 37.8075  4.9096   1
   1  23   3 40.0791  5.3053   1
  -2 -23  -3 -0.0523  2.2840   3
   2  23   3 0.78560 2.81441   1
  -2  23  -3 3.80603 2.90551   1
  -3 -23  -3 30.5464  4.1743   3
   3  23   3 26.2065  4.6516   1
  -3  23  -3 24.8944  4.5011   2
  -4 -23  -3 1.23288 2.41811   3
  -4  23  -3 2.89864 3.12362   2
   4  23   3 0.86569 2.78441   1
  -5 -23  -3 11.4701  3.1850   3
  -5  23  -3 7.98621 3.77177   2
   5  23   3 6.64684 3.66917   1
  -6 -23  -3 2.48272 2.63216   3
   6  23   3 1.53619 3.33781   1
  -6  23  -3 2.45505 3.50077   2
  -7 -23  -3 -1.1053  2.5109   3
  -7  23  -3 -1.7697  3.3310   2
   7  23   3 3.28454 3.51777   1
  -8  23  -3 -4.3730  3.5147   2
  -8 -24   3 3.94634 3.21534   3
   8  24  -3 3.75413 3.94783   1
  -8  24   3 2.48746 3.31019   2
  -7 -24   3 10.2100  3.3440   3
  -7  24   3 13.9416  4.1013   2
   7  24  -3 8.09343 3.88333   1
  -6 -24   3 2.41887 2.71133   3
   6  24  -3 -1.7547  2.8178   1
  -5 -24   3 9.91035 3.34499   3
   5  24  -3 11.3755  3.5793   1
  -4 -24   3 5.40072 2.88903   3
   4  24  -3 4.59087 3.10562   1
  -3 -24   3 8.09207 3.07469   3
  -3  24   3 16.0988  3.9341   1
   3  24  -3 9.19185 3.44876   1
  -2 -24   3 0.23464 2.47652   3
  -2  24   3 0.85652 2.91861   1
   2  24  -3 -1.0201  2.7244   1
  -1 -24   3 -2.0178  2.4245   3
   1  24  -3 2.58842 2.90736   1
  -1  24   3 3.44011 2.98199   1
   0 -24  -3 -0.6907  2.3228   3
   0  24  -3 3.43932 3.07004   1
   0  24   3 -0.7506  2.7309   1
  -1 -24  -3 1.68297 2.57445   3
  -1  24  -3 6.28764 3.00524   1
   1  24   3 3.99468 3.29670   1
  -2 -24  -3 0.23371 2.64099   3
  -2  24  -3 3.92361 3.13982   1
   2  24   3 1.76239 2.92667   1
  -3 -24  -3 0.83264 2.65709   3
   3  24   3 4.89470 3.32162   1
  -4 -24  -3 0.41340 2.50277   3
  -4  24  -3 1.16691 3.29564   2
   4  24   3 5.19875 3.50465   1
  -5 -24  -3 20.4588  3.9290   3
  -5  24  -3 10.7089  4.0627   2
   5  24   3 14.4855  4.3350   1
  -6 -24  -3 0.98574 2.89820   3
   6  24   3 3.28344 3.53238   1
  -6  24  -3 0.53250 3.27205   2
  -7 -24  -3 6.43219 3.31514   3
  -7  24  -3 10.0448  4.2751   2
   7  24   3 17.1086  4.8868   1
  -7 -25   3 1.16955 3.01183   3
   7  25  -3 0.97441 3.49680   1
  -6 -25   3 -1.6117  2.4047   3
   6  25  -3 1.74165 3.30983   1
  -5 -25   3 0.07597 2.80045   3
   5  25  -3 0.07121 3.15650   1
  -4 -25   3 0.03737 2.56327   3
   4  25  -3 -1.9279  2.8597   1
  -3 -25   3 8.72944 3.27384   3
   3  25  -3 7.34221 3.59532   1
  -3  25   3 8.55457 3.64996   1
  -2 -25   3 12.3785  3.5079   3
  -2  25   3 8.32780 3.72988   1
   2  25  -3 18.5323  4.2229   1
  -1  25   3 19.0135  4.3323   1
   1  25  -3 22.7013  4.3219   1
   0 -25  -3 2.31920 2.76585   3
   0  25   3 3.22106 3.45493   1
   0  25  -3 4.59737 3.16274   1
  -1 -25  -3 13.1386  3.5141   3
  -1  25  -3 5.51559 3.19406   1
   1  25   3 12.6151  3.8973   1
  -2 -25  -3 0.41116 2.62600   3
   2  25   3 -2.7562  2.8514   1
  -2  25  -3 0.03564 2.96580   1
  -3 -25  -3 15.8395  3.5767   3
   3  25   3 5.58369 3.69179   1
  -4 -25  -3 2.48746 2.56902   3
   4  25   3 4.22789 3.35538   1
  -5 -25  -3 3.23638 3.10780   3
  -5  25  -3 3.58862 3.52904   2
   5  25   3 4.83447 3.78399   1
  -6 -25  -3 0.56123 3.00701   3
  -6  25  -3 1.39331 3.69800   2
   6  25   3 5.31321 4.09243   1
  -5 -26   3 5.48105 3.14473   3
   5  26  -3 3.38071 3.53386   1
  -4 -26   3 -2.5198  2.6223   3
   4  26  -3 0.51819 3.44395   1
  -3 -26   3 3.88734 2.90179   3
  -3  26   3 2.19763 3.34085   1
   3  26  -3 7.59443 3.84807   1
  -2 -26   3 8.79473 3.32196   3
   2  26  -3 3.27202 3.45526   1
  -2  26   3 7.91843 3.92302   1
   1  26  -3 -1.8656  2.8853   1
  -1  26   3 -0.1163  3.0985   1
   0 -26  -3 -3.1851  2.4956   3
   0  26  -3 0.41991 2.99782   1
   0  26   3 3.82693 3.51560   1
  -1 -26  -3 -1.4695  2.6028   3
  -1  26  -3 -3.0958  2.8770   1
   1  26   3 -0.8399  3.2211   1
  -2 -26  -3 1.27566 2.92398   3
   2  26   3 3.71762 3.31218   1
  -3 -26  -3 4.04234 3.07987   3
   3  26   3 2.01342 3.39380   1
  -4 -26  -3 1.81452 3.02070   3
   4  26   3 8.72598 3.98972   1
  -4 -27   3 0.96134 2.95311   3
   4  27  -3 5.08520 3.90417   1
  -3 -27   3 3.94950 3.35360   3
   3  27  -3 -0.8914  3.0604   1
  -2 -27   3 7.98643 3.51416   3
  -2  27   3 7.89909 3.89558   1
   2  27  -3 3.28866 3.94519   1
  -1  27   3 -0.5183  3.5644   1
   1  27  -3 10.7868  4.1431   1
   0  27  -3 7.76147 3.84580   1
   0  27   3 8.61091 3.79463   1
  -1 -27  -3 7.53078 3.38329   3
  -1  27  -3 7.06087 3.61468   1
   1  27   3 10.1045  4.2295   1
  -2 -27  -3 3.39787 3.09425   3
   2  27   3 6.81391 3.73947   1
  -3 -27  -3 3.89293 3.12640   3
   3  27   3 7.34389 4.01562   1
 -15   0   4 -6.7785  2.3665   3
 -14   0   4 53.2897  5.9875   3
 -13   0   4 -3.3054  2.2948   2
 -13   0   4 2.13070 2.48596   3
 -12   0   4 65.6842  5.8460   3
 -12   0   4 77.5745  6.1041   2
 -11   0   4 1.28375 2.36797   3
 -11   0   4 -3.2614  2.2150   2
 -10   0   4 9.26439 2.64093   3
 -10   0   4 6.52180 2.21378   2
  -9   0   4 -3.0929  1.2855   2
  -9   0   4 -0.4018  1.3448   3
  -8   0   4 10.2295  2.2840   3
  -7   0   4 -0.6661  1.1860   2
   7   0  -4 -1.4348  0.8010   1
  -7   0   4 -0.0570  1.1224   3
  -6   0   4 -0.4209  0.4804   3
  -5   0   4 -0.4105  0.7004   2
  -5   0   4 -0.2261  0.5903   3
   5   0  -4 0.55940 0.59647   1
  -4   0   4 588.993  26.011   3
  -4   0   4 571.911  26.939   1
   4   0  -4 570.254  27.002   1
  -4   0   4 564.321  28.650   2
  -3   0   4 -0.8052  0.4932   2
   3   0  -4 -0.5765  0.4118   1
  -3   0   4 0.28203 0.42982   3
  -3   0   4 0.47465 0.59975   1
  -2   0   4 8842.45  458.00   2
  -2   0   4 9999.99  433.09   1
  -1   0   4 -1.2689  0.4105   2
  -1   0   4 0.06361 0.55284   1
   0   0   4 7.71622 1.12112   1
   0   0   4 8.00622 1.10433   2
   1   0   4 -0.9871  0.5425   1
   2   0   4 1141.24   53.10   1
  -3   0  -4 1.53860 0.80351   2
   3   0   4 -0.1007  0.5696   1
   4   0   4 728.154  33.801   1
  -4   0  -4 708.382  35.800   2
   5   0   4 0.75509 0.74014   1
  -5   0  -4 -1.0613  0.8376   2
  -6   0  -4 39.7338  3.3330   2
  -7   0  -4 -1.4822  1.0725   2
  -8   0  -4 3.19979 1.67007   2
  -9   0  -4 -1.4659  2.1152   3
  -9   0  -4 0.72124 1.73974   2
 -10   0  -4 84.7147  6.9466   3
 -10   0  -4 88.6451  6.3946   2
 -11   0  -4 -0.7201  2.2933   3
 -12   0  -4 28.5422  4.8913   3
 -13   0  -4 -0.5371  2.6834   3
 -14   0  -4 20.1888  5.1331   3
 -15  -1   4 1.12679 2.71508   3
 -15   1   4 0.53849 2.93553   3
 -14  -1   4 1.23703 2.78471   3
 -14   1   4 3.31405 2.82501   2
 -14   1   4 -1.2455  2.3942   3
 -13  -1   4 -1.7369  2.3600   3
 -13  -1   4 0.65816 2.78049   2
 -13   1   4 1.45416 2.45144   3
 -13   1   4 -5.1310  2.3423   2
 -12  -1   4 14.1608  3.3672   3
 -12  -1   4 12.9518  3.0700   2
 -12   1   4 9.20183 3.25677   3
 -12   1   4 17.8306  3.4832   2
 -11  -1   4 -5.0388  2.1744   2
 -11  -1   4 0.15071 2.13917   3
 -11   1   4 -2.0851  2.2975   2
 -11   1   4 3.37123 2.39371   3
 -10  -1   4 117.612   7.489   3
 -10  -1   4 110.782   7.458   2
 -10   1   4 108.154   7.487   2
 -10   1   4 128.899   7.668   3
  -9  -1   4 -1.9021  1.4084   2
  -9  -1   4 1.51376 1.43959   3
  -9   1   4 -2.6078  1.3831   2
  -9   1   4 -1.5810  1.3106   3
  -8  -1   4 457.248  21.270   3
  -8  -1   4 439.542  22.818   2
  -8   1   4 414.048  22.860   2
  -8   1   4 453.294  21.241   3
  -7  -1   4 83.4808  5.0036   3
  -7  -1   4 80.6567  5.2282   2
   7  -1  -4 78.0349  4.2973   1
  -7   1   4 84.8251  5.3974   2
   7   1  -4 75.8670  4.4655   1
  -6  -1   4 580.348  28.104   2
   6  -1  -4 563.759  26.116   1
  -6   1   4 566.678  28.197   2
  -6   1   4 485.626  25.583   3
   6   1  -4 581.316  26.238   1
  -5  -1   4 1.53862 0.91662   2
  -5  -1   4 1.28378 0.63296   3
   5  -1  -4 3.49718 0.83822   1
   5   1  -4 3.58249 0.86980   1
  -5   1   4 3.43200 1.14538   2
  -5   1   4 4.51273 1.03890   3
  -4  -1   4 159.646   8.494   2
  -4  -1   4 159.077   7.665   3
   4  -1  -4 155.010   7.945   1
  -4   1   4 153.822   8.528   2
   4   1  -4 165.320   8.008   1
  -4   1   4 155.540   7.646   3
  -4   1   4 157.152   7.883   1
  -3  -1   4 376.475  17.516   3
  -3  -1   4 380.251  19.475   2
  -3  -1   4 400.557  18.454   1
  -3   1   4 391.500  18.431   1
  -3   1   4 389.204  19.514   2
  -3   1   4 385.789  17.491   3
  -2  -1   4 2537.25  115.09   1
  -2  -1   4 2235.39  121.56   2
  -2  -1   4 2525.25  110.41   3
  -2   1   4 2390.26  115.06   1
   2   1  -4 2688.59  115.18   1
  -2   1   4 2605.59  121.62   2
  -1  -1   4 0.37131 0.53098   2
  -1  -1   4 0.61321 0.59141   1
   1   1  -4 0.89436 0.68750   1
  -1   1   4 0.04690 0.56473   1
  -1   1   4 1.34453 0.53596   2
   0  -1   4 1679.56   80.70   2
   0  -1   4 1701.83   76.36   1
   0   1   4 1567.72   76.34   1
   2  -1   4 687.926  29.780   1
   2   1   4 576.316  29.725   1
   3  -1   4 3.16536 0.78434   1
  -3  -1  -4 3.05191 0.87505   2
   3   1   4 3.69804 0.94014   1
  -3   1  -4 3.47091 0.97975   2
  -4  -1  -4 636.917  31.695   2
   4  -1   4 635.021  29.915   1
   4   1   4 632.915  30.061   1
  -4   1  -4 636.875  31.906   2
   5  -1   4 82.6138  4.7141   1
  -5  -1  -4 85.5593  5.1971   2
   5   1   4 89.3880  4.9433   1
  -5   1  -4 84.4675  5.3779   2
   6  -1   4 535.054  25.375   1
  -6  -1  -4 536.256  27.150   2
  -6   1  -4 538.529  27.371   2
   6   1   4 535.414  25.640   1
  -7  -1  -4 24.9944  2.7964   2
  -7   1  -4 24.8258  2.8775   2
  -8  -1  -4 244.492  13.382   3
  -8  -1  -4 232.365  13.180   2
  -8   1  -4 252.859  13.531   2
  -9  -1  -4 1.22790 2.30764   3
  -9  -1  -4 3.47719 1.98679   2
  -9   1  -4 6.39762 2.13512   2
 -10  -1  -4 26.6257  4.5312   3
 -10   1  -4 37.6296  4.1589   2
 -10   1  -4 31.5101  4.5985   3
 -11  -1  -4 1.67530 2.58288   3
 -11   1  -4 -4.2183  1.9170   3
 -12  -1  -4 2.92834 2.84127   3
 -12   1  -4 2.80374 2.92803   3
 -13  -1  -4 0.80920 2.92393   3
 -13   1  -4 -0.8329  2.4670   3
 -14  -1  -4 0.18834 3.31990   3
 -14   1  -4 1.36742 3.36585   3
 -15  -2   4 -1.2772  2.5958   3
 -15   2   4 -2.4467  2.7251   3
 -14  -2   4 39.6820  5.2671   3
 -14   2   4 47.5404  5.7738   3
 -14   2   4 50.8864  5.6417   2
 -13  -2   4 7.27210 3.08004   3
 -13   2   4 8.04121 3.18893   2
 -13   2   4 6.12154 3.04240   3
 -12  -2   4 66.7448  5.5671   2
 -12  -2   4 68.5932  5.8928   3
 -12   2   4 56.5514  5.5780   2
 -12   2   4 73.0144  6.0810   3
 -11  -2   4 23.4178  3.8781   3
 -11  -2   4 29.0024  3.7864   2
 -11   2   4 31.9189  4.2960   3
 -11   2   4 20.8765  3.7602   2
 -10  -2   4 34.8344  3.7360   2
 -10  -2   4 34.2028  4.0147   3
 -10   2   4 26.0318  3.7148   3
 -10   2   4 31.2186  3.8756   2
  -9  -2   4 8.28549 2.04683   2
  -9  -2   4 10.1513  2.1432   3
  -9   2   4 8.02016 2.19933   2
  -9   2   4 7.29366 2.06292   3
  -8  -2   4 11.4291  2.1070   2
  -8  -2   4 2.73122 1.80670   3
  -7  -2   4 29.8001  2.9862   3
   7  -2  -4 32.1650  2.0789   1
  -7  -2   4 30.8174  2.8244   2
  -7   2   4 29.7134  3.0635   2
   7   2  -4 26.8284  2.3262   1
  -6  -2   4 15.4254  2.0323   2
  -6  -2   4 14.2755  1.9154   3
   6   2  -4 21.9425  1.8113   1
  -5  -2   4 111.024   6.461   2
   5  -2  -4 113.730   5.922   1
  -5   2   4 110.042   6.645   2
  -5   2   4 118.566   5.873   1
   5   2  -4 116.021   6.024   1
  -4  -2   4 182.912   9.601   2
  -4   2   4 173.248   9.662   2
  -4   2   4 185.661   8.960   1
  -3  -2   4 968.589  43.432   3
  -3  -2   4 957.039  47.882   2
   3   2  -4 996.266  45.368   1
  -3   2   4 975.711  45.294   1
  -3   2   4 970.056  47.951   2
  -2  -2   4 2099.72  110.42   2
  -2  -2   4 2312.87  100.31   3
  -2   2   4 2267.62  104.53   1
   2   2  -4 2413.24  104.59   1
  -2   2   4 2236.06  110.41   2
  -1  -2   4 689.874  34.917   1
  -1  -2   4 658.534  36.880   2
  -1  -2   4 728.700  33.385   3
   1   2  -4 712.678  34.979   1
  -1   2   4 845.463  35.108   1
  -1   2   4 848.401  36.829   2
   0  -2   4 1598.26   71.72   1
   0  -2  -4 1534.50   68.70   3
   0  -2   4 1579.65   75.90   2
   0   2   4 1510.04   75.57   2
   0   2   4 1465.54   71.74   1
   0   2  -4 1605.66   71.75   1
  -1  -2  -4 79.4322  4.2402   3
   1   2   4 84.6301  4.6425   1
   1   2   4 81.8330  4.5557   2
  -1   2  -4 81.6472  4.5103   1
   2  -2   4 1537.00   71.12   1
   3  -2   4 56.7410  3.2898   1
  -3  -2  -4 57.3212  3.4337   2
  -3   2  -4 54.1237  3.7142   2
   3   2   4 54.0205  3.4540   1
  -4  -2  -4 833.539  40.147   2
   4  -2   4 801.854  37.892   1
  -4   2  -4 814.082  40.544   2
   4   2   4 797.107  38.182   1
  -5  -2  -4 23.0269  2.0892   2
  -5  -2  -4 23.6490  2.9305   3
   5  -2   4 22.4555  1.8013   1
   5   2   4 23.6399  2.1354   1
  -5   2  -4 20.9432  2.5107   2
  -6  -2  -4 37.6699  4.0181   3
  -6  -2  -4 38.8513  3.1367   2
  -6   2  -4 38.7743  3.5216   2
   6   2   4 50.8100  3.2538   1
  -7  -2  -4 -0.4623  1.1217   2
  -7  -2  -4 -0.9040  1.4776   3
  -7   2  -4 -1.3794  1.1808   2
  -8  -2  -4 12.0276  3.0712   3
  -8  -2  -4 14.9202  2.2719   2
  -8   2  -4 14.4569  2.5975   2
  -9  -2  -4 23.3876  3.9458   3
  -9   2  -4 24.9650  3.4324   2
 -10  -2  -4 84.7889  7.1225   3
 -10   2  -4 90.9691  6.6293   2
 -11  -2  -4 3.19294 2.52941   3
 -11   2  -4 -0.5849  2.1132   2
 -11   2  -4 3.26930 2.54327   3
 -12  -2  -4 32.2048  5.1718   3
 -12   2  -4 31.9620  4.9897   3
 -13  -2  -4 4.54939 3.38081   3
 -13   2  -4 6.25370 3.41010   3
 -14  -2  -4 25.8785  5.1551   3
 -14   2  -4 23.9268  5.1447   3
 -15  -3   4 -2.3494  2.6271   3
 -15   3   4 0.00277 2.79526   3
 -15   3   4 3.45018 3.00222   2
 -14  -3   4 -5.6544  2.2411   3
 -14   3   4 1.59596 2.69197   2
 -14   3   4 -1.9498  2.7406   3
 -13  -3   4 -1.9335  2.4787   3
 -13   3   4 -1.1859  2.6312   2
 -13   3   4 1.47392 2.30912   3
 -12  -3   4 8.57913 2.94466   3
 -12   3   4 5.40855 2.81481   3
 -12   3   4 13.1912  3.3288   2
 -11  -3   4 11.8310  2.6653   2
 -11  -3   4 7.84616 2.80441   3
 -11   3   4 5.98529 2.59706   3
 -11   3   4 2.58402 2.76258   2
 -10  -3   4 92.3384  6.2843   2
 -10  -3   4 82.8875  6.0981   3
 -10   3   4 98.6117  6.4364   3
 -10   3   4 87.4043  6.5736   2
  -9  -3   4 12.0552  2.2642   3
  -9  -3   4 10.7716  2.2342   2
  -9   3   4 9.54935 2.36839   2
  -9   3   4 10.2430  2.3129   3
  -8  -3   4 379.157  17.489   3
  -8  -3   4 346.240  18.536   2
  -8   3   4 350.612  18.941   2
   8   3  -4 345.873  17.246   1
  -7  -3   4 157.075   8.923   2
  -7  -3   4 164.694   8.511   3
   7  -3  -4 158.903   7.854   1
   7   3  -4 157.987   8.228   1
  -7   3   4 155.445   9.267   2
  -6  -3   4 522.461  23.925   3
  -6  -3   4 506.819  25.977   2
   6  -3  -4 505.023  24.219   1
  -6   3   4 517.317  26.346   2
  -6   3   4 518.503  24.151   1
   6   3  -4 519.358  24.472   1
  -5  -3   4 140.321   7.831   2
  -5  -3   4 142.246   7.246   3
  -5   3   4 135.526   7.141   1
  -5   3   4 145.169   8.161   2
   5   3  -4 149.928   7.407   1
  -4  -3   4 490.793  24.793   2
  -4   3   4 494.753  25.000   2
  -4   3   4 499.158  23.368   1
  -3  -3   4 83.5550  4.7653   2
   3   3  -4 84.2531  4.5606   1
  -3   3   4 77.0980  4.4640   1
  -3   3   4 83.2864  4.8209   2
  -2  -3   4 177.176  10.044   2
  -2   3   4 188.618   9.606   1
   2   3  -4 184.018   9.575   1
  -2   3   4 221.964  10.112   2
  -1  -3   4 51.9345  3.6916   2
  -1   3   4 74.7936  3.7443   1
   1   3  -4 58.0894  3.5402   1
   0  -3  -4 26.0657  1.5340   3
   0  -3   4 24.0718  1.8706   1
   0   3  -4 24.6186  1.9583   1
   0   3   4 26.6401  2.0251   1
   0   3   4 23.2237  1.7157   2
  -1  -3  -4 202.909   9.681   3
   1   3   4 200.506  10.446   2
   1   3   4 207.116  10.315   1
  -1   3  -4 210.952  10.172   1
  -2  -3  -4 1127.83   51.32   3
   2  -3   4 1148.69   53.09   1
   2   3   4 1135.86   53.33   1
  -2   3  -4 1160.75   53.10   1
  -3  -3  -4 11.2380  1.6205   3
  -3  -3  -4 13.1462  1.3343   2
   3  -3   4 10.9999  1.2135   1
  -3   3  -4 11.1616  1.2698   1
  -3   3  -4 9.85421 1.60496   2
   3   3   4 6.29367 1.14718   1
  -4  -3  -4 349.677  17.113   2
  -4  -3  -4 346.235  16.448   3
   4  -3   4 329.107  16.130   1
   4   3   4 350.205  16.632   1
  -4   3  -4 326.762  16.125   1
  -4   3  -4 329.007  17.663   2
  -5  -3  -4 11.1234  2.0422   3
   5  -3   4 9.32884 1.13893   1
  -5  -3  -4 10.5363  1.4084   2
  -5   3  -4 9.62030 1.16488   1
   5   3   4 10.8996  1.6891   1
  -5   3  -4 11.3257  1.8702   2
  -6  -3  -4 293.233  15.027   2
  -6  -3  -4 293.192  14.908   3
  -6   3  -4 292.643  15.670   2
   6   3   4 281.727  14.553   1
  -7  -3  -4 94.7449  5.9477   2
  -7  -3  -4 115.258   7.014   3
  -7   3  -4 94.1271  6.5138   2
   7   3   4 104.587   6.116   1
  -8  -3  -4 76.8392  5.0828   2
  -8  -3  -4 76.3361  5.9623   3
  -8   3  -4 74.7080  5.6149   2
  -9  -3  -4 27.1072  4.3227   3
  -9   3  -4 36.9155  4.2150   2
 -10  -3  -4 40.9578  5.3553   3
 -10   3  -4 49.1608  4.8299   2
 -11  -3  -4 11.4004  3.3288   3
 -11   3  -4 10.7264  2.9867   2
 -12  -3  -4 3.32365 3.11664   3
 -12   3  -4 3.09016 2.89397   3
 -12   3  -4 6.13674 2.87446   2
 -13  -3  -4 -0.3913  2.6961   3
 -13   3  -4 -0.5456  2.6274   3
 -14  -3  -4 -0.8085  3.3992   3
 -14   3  -4 3.34472 3.17430   3
 -15  -4   4 1.50918 3.04597   3
 -15   4   4 4.20973 3.27263   2
 -15   4   4 -1.2509  2.6622   3
 -14  -4   4 19.7552  3.8595   3
 -14   4   4 24.9433  4.4718   3
 -14   4   4 15.2584  3.8593   2
 -13  -4   4 14.9569  3.6468   3
 -13   4   4 19.3246  3.8985   2
 -13   4   4 20.8860  3.8545   3
 -12  -4   4 21.8758  3.7132   3
 -12   4   4 19.4032  3.6683   3
 -12   4   4 19.1767  3.8543   2
 -11  -4   4 16.0065  2.9166   2
 -11  -4   4 12.0220  3.0288   3
 -11   4   4 14.1460  3.1050   3
 -11   4   4 15.6240  3.4849   2
 -10  -4   4 79.5091  5.8455   3
 -10  -4   4 83.4914  5.9178   2
 -10   4   4 85.4917  6.3745   2
  -9  -4   4 44.1193  3.8842   2
  -9  -4   4 48.6378  3.9758   3
  -9   4   4 41.9207  4.3241   2
  -8  -4   4 41.4545  3.5203   2
  -8  -4   4 39.9743  3.5398   3
   8   4  -4 43.9051  3.2382   1
  -8   4   4 51.5290  4.2320   2
  -7  -4   4 16.2234  2.1101   2
  -7  -4   4 16.3037  2.2063   3
  -7   4   4 12.7712  2.3898   2
   7   4  -4 17.9684  2.0307   1
  -6  -4   4 73.1569  4.5661   2
   6  -4  -4 67.4049  3.9930   1
  -6  -4   4 71.8138  4.4027   3
  -6   4   4 78.6671  5.0510   2
  -6   4   4 68.3204  3.8762   1
   6   4  -4 75.1692  4.3419   1
  -5  -4   4 161.352   8.921   2
  -5  -4   4 167.376   8.309   3
  -5   4   4 165.735   9.294   2
  -5   4   4 167.664   8.271   1
  -4  -4   4 281.567  14.954   2
  -4  -4   4 276.456  13.637   3
  -4   4   4 286.485  14.103   1
   4   4  -4 304.593  14.273   1
  -4   4   4 312.751  15.293   2
  -3  -4   4 105.873   5.306   3
  -3  -4   4 104.516   5.930   2
  -3   4   4 109.862   6.056   2
  -3   4   4 105.264   5.627   1
   3   4  -4 103.683   5.647   1
  -2  -4   4 336.626  17.141   2
  -2  -4   4 320.070  15.366   3
   2   4  -4 334.797  16.209   1
  -2   4   4 314.275  16.191   1
  -2   4   4 377.160  17.093   2
  -1  -4   4 407.523  18.704   3
   1  -4  -4 402.532  18.329   3
  -1  -4   4 392.469  20.734   2
   1   4  -4 395.821  19.559   1
  -1   4   4 456.946  19.745   1
   0  -4  -4 1762.67   72.20   3
   0   4   4 1526.97   79.26   2
   0   4  -4 1618.04   75.31   1
   0   4   4 1600.25   75.44   1
  -1  -4  -4 150.998   7.191   3
   1   4   4 147.879   7.759   1
   1   4   4 143.617   7.619   2
  -1   4  -4 152.223   7.559   1
  -2  -4  -4 889.533  40.345   3
   2   4   4 874.275  41.996   1
  -2   4  -4 919.031  41.705   1
  -3  -4  -4 81.2917  4.6893   3
  -3  -4  -4 78.4376  4.3899   2
  -3   4  -4 84.7543  4.3841   1
  -3   4  -4 78.7836  5.1312   2
   3   4   4 77.8966  4.7114   1
  -4  -4  -4 917.809  41.487   3
  -4  -4  -4 916.621  44.516   2
   4   4   4 919.078  42.753   1
  -4   4  -4 895.225  42.128   1
  -4   4  -4 884.176  45.309   2
  -5  -4  -4 26.5521  3.0843   3
  -5  -4  -4 30.7250  2.2144   2
  -5   4  -4 28.0755  1.9308   1
   5   4   4 28.9391  2.5797   1
  -5   4  -4 26.6068  3.0419   2
  -6  -4  -4 8.89844 1.40378   2
  -6  -4  -4 7.21732 2.10239   3
   6   4   4 7.36670 1.57891   1
  -6   4  -4 7.71339 1.90349   2
  -7  -4  -4 5.83981 1.37582   2
  -7  -4  -4 5.91645 2.06496   3
   7   4   4 6.33405 1.55002   1
  -7   4  -4 8.88374 2.04135   2
  -8  -4  -4 3.50250 2.17499   3
  -8   4  -4 3.51545 1.87619   2
  -9  -4  -4 67.1688  6.2392   3
  -9   4  -4 62.3644  5.5297   2
 -10  -4  -4 63.0954  6.5464   3
 -10   4  -4 60.1223  5.5855   2
 -11  -4  -4 12.0855  3.4527   3
 -11   4  -4 3.64008 2.63892   2
 -12  -4  -4 27.9678  4.9649   3
 -12   4  -4 27.6546  4.3432   2
 -13  -4  -4 5.41973 3.69292   3
 -13   4  -4 15.8991  4.0690   3
 -14  -4  -4 28.0705  5.2915   3
 -14   4  -4 28.1964  5.2759   3
 -15  -5   4 1.03006 2.94259   3
 -15   5   4 6.36109 3.77603   3
 -15   5   4 2.08202 2.86703   2
 -14  -5   4 -0.2580  2.5549   3
 -14   5   4 0.14321 2.73417   3
 -14   5   4 -1.4816  2.5092   2
 -13  -5   4 2.07721 2.56201   3
 -13   5   4 0.36428 2.46883   3
 -13   5   4 3.76407 2.96153   2
 -12  -5   4 0.51008 2.09146   3
 -12   5   4 0.44907 2.31709   3
 -12   5   4 0.92110 2.46757   2
 -11  -5   4 17.0546  3.1011   3
 -11   5   4 14.1775  3.2345   2
 -10  -5   4 78.5421  5.5172   2
 -10  -5   4 77.0315  5.5973   3
 -10   5   4 75.3795  6.1275   2
  -9  -5   4 67.5292  4.8913   2
  -9  -5   4 76.5116  5.2038   3
  -9   5   4 63.1760  5.6600   2
  -8  -5   4 181.238   9.459   3
  -8  -5   4 170.336   9.753   2
   8   5  -4 171.047   9.233   1
  -8   5   4 173.664  10.359   2
  -7  -5   4 120.240   7.083   2
  -7  -5   4 121.525   6.851   3
  -7   5   4 117.304   7.624   2
  -7   5   4 123.106   6.149   1
   7   5  -4 126.790   6.804   1
  -6  -5   4 120.642   6.464   3
  -6  -5   4 119.122   6.769   2
  -6   5   4 112.823   7.219   2
   6   5  -4 120.257   6.499   1
  -6   5   4 117.785   6.061   1
  -5  -5   4 423.169  18.959   3
  -5  -5   4 411.891  20.565   2
   5   5  -4 356.136  19.437   1
  -5   5   4 412.165  20.963   2
  -5   5   4 422.084  19.319   1
  -4  -5   4 213.692  10.616   3
  -4  -5   4 219.727  11.615   2
  -4   5   4 219.074  10.954   1
   4   5  -4 227.470  11.119   1
  -4   5   4 230.042  11.928   2
  -3  -5   4 183.958   9.264   3
  -3  -5   4 196.638  10.300   2
   3   5  -4 196.618   9.811   1
  -3   5   4 210.812  10.445   2
  -3   5   4 185.342   9.713   1
  -2  -5   4 162.347   7.863   3
  -2  -5   4 168.207   8.869   2
  -2   5   4 151.965   8.312   1
   2   5  -4 156.856   8.317   1
  -2   5   4 178.038   8.765   2
  -1  -5   4 10.5122  1.1991   3
   1  -5  -4 9.97712 0.80849   3
  -1  -5   4 9.46796 1.44353   2
  -1   5   4 9.96364 1.19712   2
  -1   5   4 9.69185 1.30898   1
   1   5  -4 9.96339 1.28669   1
   0  -5  -4 22.1371  1.4209   3
   0   5   4 20.6634  1.8754   1
   0   5  -4 21.3073  1.7575   1
   0   5   4 22.2184  1.5450   2
  -1  -5  -4 95.3586  4.6332   3
  -1   5  -4 94.9246  4.8756   1
   1   5   4 84.4994  5.0602   1
   1   5   4 84.0941  4.6887   2
  -2  -5  -4 61.4683  3.6098   3
   2   5   4 60.0646  3.8647   1
  -2   5  -4 62.3180  3.5437   1
  -3  -5  -4 78.7325  4.4647   2
  -3  -5  -4 84.7770  4.8262   3
  -3   5  -4 84.7746  5.3887   2
   3   5   4 83.3919  4.9927   1
  -3   5  -4 91.2174  4.5709   1
  -4  -5  -4 3.97405 1.26472   3
  -4  -5  -4 6.25129 0.85401   2
  -4   5  -4 7.02659 1.00594   1
  -4   5  -4 5.32671 1.49001   2
  -5  -5  -4 126.173   6.625   2
  -5  -5  -4 121.709   7.153   3
  -5   5  -4 123.764   6.198   1
  -5   5  -4 124.844   7.620   2
   5   5   4 119.453   7.031   1
  -6  -5  -4 111.993   6.085   2
  -6  -5  -4 119.046   6.934   3
   6   5   4 104.297   6.475   1
  -6   5  -4 103.658   7.006   2
  -7  -5  -4 49.8695  4.3787   3
  -7   5  -4 50.1040  4.2408   2
   7   5   4 48.7289  3.8035   1
  -8  -5  -4 15.1836  3.0514   3
  -8   5  -4 18.9030  3.0325   2
  -9  -5  -4 56.9136  5.9350   3
  -9   5  -4 52.0666  5.2805   2
 -10  -5  -4 110.239   8.140   3
 -10   5  -4 97.5973  7.4426   2
 -11  -5  -4 15.6913  3.8080   3
 -11   5  -4 23.3004  3.9421   2
 -12  -5  -4 4.25865 2.92901   3
 -12   5  -4 -0.4020  2.6531   2
 -13  -5  -4 -3.4814  2.5702   3
 -13   5  -4 -1.8747  2.5216   2
 -14  -5  -4 4.16385 3.35095   3
 -14   5  -4 0.16747 3.03260   3
 -15  -6   4 9.76565 3.74704   3
 -15   6   4 16.7066  4.0915   2
 -14  -6   4 10.9260  3.4213   3
 -14   6   4 14.9529  3.9116   3
 -14   6   4 14.8399  3.7571   2
 -13  -6   4 16.8752  3.5622   3
 -13   6   4 16.8985  3.6060   3
 -13   6   4 15.5888  3.7567   2
 -12  -6   4 9.53222 2.73083   3
 -12   6   4 3.91635 2.82325   2
 -11  -6   4 36.7878  4.1919   3
 -11   6   4 33.0034  4.4968   2
 -10  -6   4 32.2995  3.9174   3
 -10   6   4 38.6725  4.5825   2
  -9  -6   4 42.6646  3.8397   3
  -9  -6   4 44.8347  3.7193   2
   9   6  -4 39.2336  3.5157   1
  -9   6   4 40.0339  4.5426   2
  -8  -6   4 27.2239  3.0068   3
  -8  -6   4 23.7176  2.6833   2
   8   6  -4 24.6296  2.7849   1
  -8   6   4 20.4286  3.1826   2
  -7  -6   4 1.63762 1.08243   2
  -7  -6   4 2.66400 1.32754   3
   7   6  -4 -0.5281  1.1965   1
  -7   6   4 -2.1294  1.3068   2
  -6  -6   4 120.398   7.039   2
  -6  -6   4 127.734   6.824   3
  -6   6   4 126.339   7.673   2
  -6   6   4 122.059   6.399   1
  -5  -6   4 303.482  15.706   2
  -5  -6   4 313.510  14.556   3
   5   6  -4 300.228  15.014   1
  -5   6   4 306.521  16.130   2
  -5   6   4 296.993  14.720   1
  -4  -6   4 172.090   9.776   2
  -4  -6   4 189.995   9.102   3
  -4   6   4 180.937   9.279   1
   4   6  -4 192.472   9.503   1
  -4   6   4 184.310  10.115   2
  -3  -6   4 217.698  11.472   2
  -3  -6   4 207.180  10.371   3
   3   6  -4 215.291  10.909   1
  -3   6   4 239.740  11.662   2
  -3   6   4 208.094  10.835   1
  -2  -6   4 530.846  23.240   3
  -2  -6   4 515.378  25.647   2
   2   6  -4 502.587  24.223   1
  -2   6   4 497.400  25.482   2
  -2   6   4 498.098  24.258   1
   1  -6  -4 334.907  15.748   3
  -1  -6   4 352.028  16.169   3
  -1   6   4 343.357  17.506   2
   1   6  -4 348.540  16.823   1
  -1   6   4 363.604  16.993   1
   0  -6  -4 273.380  12.257   3
   0   6   4 273.756  13.294   1
   0   6  -4 260.211  13.025   1
   0   6   4 259.550  13.385   2
  -1  -6  -4 823.540  34.990   3
  -1   6  -4 787.133  36.372   1
   1   6   4 735.199  37.975   2
   1   6   4 764.198  36.707   1
  -2  -6  -4 86.5633  4.7107   3
  -2   6  -4 86.1362  4.6809   1
   2   6   4 85.7149  5.1402   1
  -3  -6  -4 75.3230  4.4238   3
  -3   6  -4 71.6841  4.9781   2
   3   6   4 68.5799  4.5914   1
  -3   6  -4 81.1159  4.1644   1
  -4  -6  -4 66.4977  4.1824   3
  -4  -6  -4 64.7014  3.4612   2
   4   6   4 58.6972  4.1523   1
  -4   6  -4 63.4106  3.5441   1
  -4   6  -4 64.1201  4.6096   2
  -5  -6  -4 21.9971  1.6560   2
  -5  -6  -4 17.7340  2.5467   3
   5   6   4 24.5569  2.6285   1
  -5   6  -4 21.0454  2.8837   2
  -5   6  -4 21.7513  1.6255   1
  -6  -6  -4 0.51970 1.29228   3
  -6   6  -4 4.09405 1.59695   2
   6   6   4 1.89008 1.10927   1
  -7  -6  -4 -1.5268  1.4712   3
  -7   6  -4 -0.6309  1.4898   2
   7   6   4 1.05704 1.27064   1
  -8  -6  -4 4.43886 2.25421   3
  -8   6  -4 2.21364 2.08846   2
  -9  -6  -4 96.1839  7.3075   3
  -9   6  -4 94.8725  7.2978   2
 -10  -6  -4 11.3255  3.3867   3
 -10   6  -4 13.2801  3.2383   2
 -11  -6  -4 24.1182  4.3929   3
 -11   6  -4 23.7215  4.1046   2
 -12  -6  -4 20.6633  4.2472   3
 -12   6  -4 12.8690  3.7339   2
 -13  -6  -4 12.6143  4.1151   3
 -13   6  -4 24.4271  4.4324   2
 -14  -6  -4 11.6407  4.2018   3
 -14   6  -4 13.7512  4.2324   3
 -15  -7   4 3.49550 3.07256   3
 -15   7   4 1.38864 2.95169   2
 -14  -7   4 0.05809 2.79936   3
 -14   7   4 -0.2693  2.7508   2
 -14   7   4 1.14471 2.96681   3
 -13  -7   4 2.75842 2.76257   3
 -13   7   4 -2.3419  2.2921   2
 -13   7   4 -1.5269  2.1402   3
 -12  -7   4 3.48573 2.35043   3
 -12   7   4 1.77035 2.76093   2
 -11  -7   4 17.0775  3.1931   3
 -11   7   4 14.4520  3.3643   2
 -10  -7   4 26.2488  3.4792   3
 -10   7   4 21.3401  3.7080   2
  -9  -7   4 101.652   6.474   3
  -9  -7   4 107.072   6.676   2
   9   7  -4 100.367   6.273   1
  -9   7   4 93.6492  7.1293   2
  -8  -7   4 102.373   6.237   2
  -8  -7   4 103.506   6.323   3
  -8   7   4 98.8397  7.0808   2
   8   7  -4 99.5400  6.1347   1
  -7  -7   4 183.062  10.074   2
  -7  -7   4 190.012   9.737   3
  -7   7   4 179.046  10.744   2
  -6  -7   4 153.321   8.592   2
  -6  -7   4 157.334   8.216   3
  -6   7   4 155.153   7.933   1
   6   7  -4 157.347   8.398   1
  -6   7   4 150.931   9.157   2
  -5  -7   4 655.925  30.188   3
  -5  -7   4 662.057  32.891   2
  -5   7   4 650.778  31.012   1
   5   7  -4 676.568  31.348   1
  -5   7   4 643.298  33.291   2
  -4  -7   4 35.3024  2.6474   2
  -4  -7   4 34.5010  2.5059   3
  -4   7   4 36.6219  2.5388   1
   4   7  -4 32.7032  2.7111   1
  -4   7   4 30.9599  2.8930   2
  -3  -7   4 410.386  20.739   2
  -3  -7   4 416.979  18.883   3
   3   7  -4 407.123  19.705   1
  -3   7   4 404.432  20.794   2
  -3   7   4 395.260  19.616   1
  -2  -7   4 270.767  13.597   2
  -2  -7   4 248.326  12.188   3
  -2   7   4 254.427  12.832   1
   2   7  -4 256.463  12.770   1
   1  -7  -4 213.620   9.868   3
  -1  -7   4 217.105  10.291   3
   1   7  -4 206.371  10.624   1
  -1   7   4 208.244  10.774   1
  -1   7   4 213.340  11.016   2
   0  -7  -4 7.76804 0.99276   3
   0   7   4 7.02246 1.35528   1
   0   7   4 9.66334 1.11371   2
   0   7  -4 8.84978 1.32019   1
  -1  -7  -4 45.6678  2.6406   3
   1   7   4 40.9798  2.3698   2
  -1   7  -4 42.3240  2.7365   1
   1   7   4 33.9415  2.8773   1
  -2  -7  -4 65.2031  3.7439   3
  -2   7  -4 52.2030  4.2522   2
  -2   7  -4 65.5975  3.6967   1
   2   7   4 66.0557  4.1931   1
  -3  -7  -4 228.877  11.230   3
   3   7   4 223.884  11.806   1
  -3   7  -4 231.590  11.193   1
  -3   7  -4 227.756  12.603   2
  -4  -7  -4 100.881   5.864   3
   4   7   4 104.755   6.186   1
  -4   7  -4 99.8051  6.5705   2
  -4   7  -4 102.808   5.350   1
  -5  -7  -4 133.992   7.290   3
   5   7   4 102.820   7.043   1
  -5   7  -4 125.159   7.892   2
  -5   7  -4 136.703   6.377   1
  -6  -7  -4 94.0251  5.8879   3
   6   7   4 83.6713  5.6701   1
  -6   7  -4 87.9188  6.2282   2
  -7  -7  -4 182.104  10.092   3
   7   7   4 174.733   9.921   1
  -7   7  -4 173.173  10.664   2
  -8  -7  -4 41.4762  4.5803   3
  -8   7  -4 36.0062  4.4277   2
  -9  -7  -4 98.7011  7.2936   3
  -9   7  -4 96.7392  7.5073   2
 -10  -7  -4 64.6266  5.8711   3
 -10   7  -4 45.9314  5.5110   2
 -11  -7  -4 27.1658  4.5471   3
 -11   7  -4 24.9486  4.3583   2
 -12  -7  -4 -0.7487  2.5573   3
 -12   7  -4 2.40190 3.00940   2
 -13  -7  -4 -0.1855  2.8999   3
 -13   7  -4 -0.6017  2.9843   2
 -15  -8   4 15.5546  3.8411   3
 -15   8   4 22.1621  4.6758   2
 -14  -8   4 0.95762 2.57306   3
 -14   8   4 4.18158 3.35900   2
 -13  -8   4 28.9258  4.2884   3
 -13   8   4 32.7235  4.9888   2
 -12  -8   4 10.9728  2.9546   3
 -12   8   4 8.29169 3.15148   2
 -11  -8   4 47.7431  4.8630   3
 -11   8   4 44.4503  5.3071   2
 -10  -8   4 5.14260 2.08602   3
 -10   8   4 4.53228 2.72539   2
  -9  -8   4 57.6289  4.6553   3
   9   8  -4 62.4210  4.5460   1
  -9   8   4 59.2788  5.3587   2
  -8  -8   4 10.3795  1.8328   2
  -8  -8   4 13.1580  2.3230   3
   8   8  -4 13.5131  2.2441   1
  -8   8   4 6.45063 2.40171   2
  -7  -8   4 -0.4502  1.0633   3
  -7  -8   4 -0.9416  0.7830   2
   7   8  -4 -1.1512  1.1360   1
  -7   8   4 1.07966 1.58865   2
  -6  -8   4 7.62073 1.67663   3
  -6  -8   4 8.84035 1.64399   2
   6   8  -4 6.46845 1.83885   1
  -6   8   4 8.80535 2.31130   2
  -6   8   4 10.0330  1.4248   1
  -5  -8   4 116.954   6.803   2
  -5  -8   4 117.337   6.482   3
   5   8  -4 121.754   6.740   1
  -5   8   4 115.284   6.391   1
  -5   8   4 119.326   7.262   2
  -4  -8   4 56.9133  3.7539   2
  -4  -8   4 52.8985  3.4815   3
  -4   8   4 54.7101  3.5510   1
   4   8  -4 53.5192  3.6910   1
  -4   8   4 54.4002  3.9744   2
  -3  -8   4 348.481  16.427   3
  -3  -8   4 351.059  18.003   2
  -3   8   4 339.639  17.084   1
  -3   8   4 364.220  18.136   2
   3   8  -4 344.102  17.163   1
  -2  -8   4 726.493  32.755   3
   2  -8  -4 735.347  32.494   3
  -2   8   4 691.547  34.102   1
   2   8  -4 727.185  34.108   1
   1  -8  -4 102.523   5.181   3
  -1  -8   4 99.6888  5.5392   3
   1   8  -4 97.3393  5.7280   1
  -1   8   4 107.892   5.976   1
  -1   8   4 107.825   5.836   2
   0  -8  -4 89.8134  4.6625   3
   0  -8   4 97.6043  5.1814   3
   0   8   4 84.7709  4.9759   2
   0   8  -4 92.4243  5.1335   1
   0   8   4 91.2741  5.4356   1
  -1  -8  -4 2236.92   94.97   3
   1   8   4 2074.60  103.75   2
  -1   8  -4 2140.42   98.65   1
   1   8   4 2084.98   99.06   1
  -2  -8  -4 1.02882 0.78308   3
  -2   8  -4 2.46480 0.88216   1
   2   8   4 0.78184 1.04377   1
  -2   8  -4 1.01024 1.20248   2
  -3  -8  -4 159.173   7.848   3
  -3   8  -4 154.397   7.671   1
   3   8   4 134.778   8.203   1
  -3   8  -4 149.618   8.910   2
  -4  -8  -4 31.5970  2.7763   3
   4   8   4 29.6097  3.2199   1
  -4   8  -4 34.2784  2.3187   1
  -4   8  -4 32.1714  3.2810   2
  -5  -8  -4 68.3990  4.5332   3
  -5   8  -4 62.4376  3.6317   1
  -5   8  -4 66.1850  5.1282   2
   5   8   4 68.0909  4.6975   1
  -6  -8  -4 -1.0800  1.2623   3
   6   8   4 -0.0054  0.6117   1
  -6   8  -4 0.74360 1.57330   2
  -7  -8  -4 5.74192 2.13423   3
   7   8   4 6.07573 1.76764   1
  -7   8  -4 7.40950 2.30895   2
  -8  -8  -4 1.67122 2.07796   3
  -8   8  -4 1.51632 2.03736   2
   8   8   4 0.50749 1.55466   1
  -9  -8  -4 43.2857  5.0997   3
  -9   8  -4 56.4079  5.3015   2
 -10  -8  -4 0.47526 2.51032   3
 -10   8  -4 0.56774 2.43487   2
 -11  -8  -4 17.4306  3.8234   3
 -11   8  -4 21.6035  4.1243   2
 -12  -8  -4 7.85670 3.64376   3
 -12   8  -4 3.41581 3.12117   2
 -13  -8  -4 26.0306  4.7538   3
 -13   8  -4 24.4040  4.7183   2
 -15  -9   4 2.32696 2.85846   3
 -15   9   4 4.45488 3.41853   2
 -14  -9   4 -2.8749  2.3366   3
 -14   9   4 0.15464 3.07215   2
 -13  -9   4 -0.7397  2.6425   3
 -13   9   4 -2.6478  2.4221   2
 -12  -9   4 -1.3653  2.0881   3
 -12   9   4 1.65939 2.92478   2
 -11  -9   4 30.7282  4.0617   3
 -11   9   4 25.7628  4.4259   2
 -10  -9   4 2.03231 1.85000   3
 -10   9   4 0.27534 2.34450   2
  -9  -9   4 84.6713  6.1122   3
   9   9  -4 100.716   6.210   1
  -9   9   4 88.7839  6.8763   2
  -8  -9   4 24.6620  3.0447   3
  -8   9   4 24.3180  3.5373   2
  -7  -9   4 116.118   6.993   3
  -7  -9   4 128.057   7.197   2
  -7   9   4 116.699   7.871   2
   7   9  -4 128.401   7.269   1
  -6  -9   4 9.82490 1.65211   2
  -6  -9   4 6.90870 1.63410   3
  -6   9   4 7.56308 2.05167   2
   6   9  -4 7.35741 1.76724   1
  -6   9   4 9.55533 1.46214   1
  -5  -9   4 389.030  18.763   3
  -5  -9   4 395.164  20.259   2
  -5   9   4 392.109  19.188   1
  -5   9   4 408.908  20.792   2
   5   9  -4 392.631  19.520   1
  -4  -9   4 42.4536  3.1624   3
  -4  -9   4 47.8163  3.3672   2
   4   9  -4 42.3661  3.3702   1
  -4   9   4 46.1387  3.6679   2
  -4   9   4 48.8288  3.2724   1
  -3  -9   4 67.5034  4.0453   3
   3   9  -4 65.7900  4.2142   1
  -3   9   4 67.4880  4.4753   2
  -3   9   4 62.3801  4.1467   1
  -2  -9   4 34.9348  2.4093   3
   2  -9  -4 32.7744  2.1674   3
  -2   9   4 25.9713  2.4616   1
  -2   9   4 20.4819  2.2033   2
   2   9  -4 26.8610  2.4309   1
  -1  -9   4 135.332   7.249   3
   1  -9  -4 137.819   6.883   3
  -1   9   4 140.817   7.705   1
   1   9  -4 144.164   7.567   1
  -1   9   4 138.031   7.625   2
   0  -9   4 19.7006  2.2546   3
   0  -9  -4 15.6773  1.6711   3
   0   9   4 16.9221  2.1758   1
   0   9  -4 22.0304  2.1997   1
   0   9   4 18.8902  1.6795   2
  -1  -9  -4 173.898   8.308   3
   1   9   4 162.099   8.530   2
  -1   9  -4 170.102   8.695   1
   1   9   4 164.996   9.085   1
  -2  -9  -4 5.04242 1.17849   3
  -2   9  -4 5.84381 1.14661   1
  -2   9  -4 8.11671 1.82279   2
   2   9   4 6.16932 1.59214   1
  -3  -9  -4 277.217  13.370   3
   3   9   4 275.118  14.189   1
  -3   9  -4 276.155  13.471   1
  -3   9  -4 270.279  15.070   2
  -4  -9  -4 56.3813  3.9488   3
  -4   9  -4 53.4629  4.5720   2
   4   9   4 57.2605  4.2780   1
  -4   9  -4 58.3311  3.4610   1
  -5  -9  -4 160.702   8.899   3
  -5   9  -4 167.273  10.099   2
   5   9   4 161.716   9.337   1
  -5   9  -4 167.556   8.346   1
  -6  -9  -4 45.6332  3.7970   3
  -6   9  -4 38.2314  4.4296   2
   6   9   4 40.1611  3.8785   1
  -7  -9  -4 287.255  14.922   3
  -7   9  -4 288.615  16.377   2
   7   9   4 284.558  15.271   1
  -8  -9  -4 19.0490  3.2457   3
  -8   9  -4 15.8610  3.3405   2
   8   9   4 19.9757  3.0847   1
  -9  -9  -4 95.0778  6.9400   3
  -9   9  -4 89.5393  7.2214   2
 -10  -9  -4 8.82033 3.00853   3
 -10   9  -4 13.5731  3.6492   2
 -11  -9  -4 20.4016  4.0074   3
 -11   9  -4 5.38760 3.19885   2
 -12  -9  -4 0.47469 2.99449   3
 -12   9  -4 -2.2965  2.6890   2
 -13  -9  -4 -4.0524  2.6126   3
 -13   9  -4 -1.3463  3.0531   2
 -14 -10   4 -2.4759  2.6251   3
 -14  10   4 3.87872 3.37323   2
 -13 -10   4 36.1924  4.7953   3
 -13  10   4 30.6122  4.9971   2
 -12 -10   4 2.52428 2.64722   3
 -12  10   4 2.33899 2.85484   2
 -11 -10   4 73.9898  5.9646   3
 -11  10   4 75.1412  6.7009   2
 -10 -10   4 0.88169 1.85476   3
 -10  10   4 1.40547 2.49922   2
  -9 -10   4 21.5791  3.0939   3
   9  10  -4 13.8636  2.4475   1
  -9  10   4 25.4262  3.8474   2
  -8 -10   4 2.83762 1.59078   3
  -8  10   4 0.88514 2.08688   2
   8  10  -4 -1.3182  1.4558   1
  -7 -10   4 5.70451 1.69040   3
   7  10  -4 4.65191 1.68376   1
  -7  10   4 6.87905 2.20804   2
  -6 -10   4 0.13471 0.92806   2
  -6 -10   4 1.87182 1.26129   3
  -6  10   4 0.09124 0.94545   1
  -6  10   4 -1.0629  1.4396   2
   6  10  -4 -1.9076  1.1700   1
  -5 -10   4 4.79733 1.48961   3
  -5 -10   4 3.62355 1.18031   2
   5  10  -4 4.74911 1.54421   1
  -5  10   4 7.21330 1.39877   1
  -5  10   4 2.61208 1.41227   2
  -4 -10   4 0.24759 0.96017   3
  -4 -10   4 -0.8605  0.8580   2
  -4  10   4 -0.7981  0.8627   1
   4  10  -4 -1.0701  1.0848   1
  -4  10   4 -1.7927  1.1012   2
  -3 -10   4 531.932  24.503   3
   3  10  -4 521.207  25.511   1
  -3  10   4 527.156  26.828   2
  -3  10   4 529.455  25.473   1
   2 -10  -4 100.284   5.272   3
  -2 -10   4 94.3587  5.4497   3
   2  10  -4 94.5408  5.7292   1
  -2  10   4 99.0621  5.8652   1
  -2  10   4 100.353   5.876   2
   1 -10  -4 80.9603  4.2709   3
  -1 -10   4 78.3454  4.6153   3
   1  10  -4 74.6491  4.6991   1
  -1  10   4 73.7536  4.6423   2
  -1  10   4 74.2107  4.8680   1
   0 -10  -4 2.98306 0.91465   3
   0 -10   4 2.66597 1.10813   3
   0  10   4 4.93563 1.49858   1
   0  10   4 3.70669 0.95088   2
   0  10  -4 3.33283 1.19553   1
  -1 -10  -4 463.881  20.866   3
  -1  10  -4 447.993  21.708   1
   1  10   4 456.874  22.204   1
   1  10   4 436.505  22.299   2
  -2 -10  -4 8.28820 1.47112   3
   2  10   4 7.52819 1.77724   1
  -2  10  -4 8.41752 2.00327   2
  -2  10  -4 7.58831 1.34686   1
  -3 -10  -4 286.417  13.711   3
   3  10   4 270.652  14.553   1
  -3  10  -4 285.646  13.869   1
  -3  10  -4 281.011  15.510   2
  -4 -10  -4 -0.6995  1.1305   3
   4  10   4 -1.8334  1.1974   1
  -4  10  -4 0.31324 1.44128   2
  -4  10  -4 -0.1843  0.8438   1
  -5 -10  -4 42.1333  3.5761   3
   5  10   4 45.5586  3.9020   1
  -5  10  -4 43.8900  4.2236   2
  -6 -10  -4 2.16112 1.61100   3
   6  10   4 0.19144 1.41021   1
  -6  10  -4 3.83748 2.21585   2
  -7 -10  -4 4.80904 2.06391   3
  -7  10  -4 6.81958 2.53882   2
   7  10   4 0.65409 1.26266   1
  -8 -10  -4 0.68819 1.82343   3
  -8  10  -4 3.16991 2.38663   2
   8  10   4 1.73806 2.02089   1
  -9 -10  -4 36.7893  4.5707   3
  -9  10  -4 33.2644  4.7236   2
 -10 -10  -4 -1.4559  2.1161   3
 -10  10  -4 -4.4194  2.3598   2
 -11 -10  -4 22.2226  4.2730   3
 -11  10  -4 29.9568  4.7915   2
 -12 -10  -4 -0.6553  2.7087   3
 -12  10  -4 0.97369 3.18989   2
 -13 -10  -4 29.2087  5.3296   3
 -13  10  -4 28.3139  5.2830   2
 -14 -11   4 -2.8059  2.5484   3
 -14  11   4 2.81764 3.21967   2
 -13 -11   4 0.73875 2.60805   3
 -13  11   4 4.03149 3.37727   2
 -12 -11   4 1.29433 2.48742   3
 -12  11   4 -1.5533  2.6748   2
 -11 -11   4 33.6932  4.2289   3
 -11  11   4 26.5494  4.4657   2
 -10 -11   4 0.02695 1.87830   3
  10  11  -4 1.45294 1.90865   1
 -10  11   4 -2.3387  2.2717   2
  -9 -11   4 54.8193  4.3263   3
   9  11  -4 38.0635  3.8273   1
  -9  11   4 46.1276  5.2655   2
  -8 -11   4 0.49127 1.61029   3
   8  11  -4 -1.3325  1.7489   1
  -8  11   4 -0.8873  1.8862   2
  -7 -11   4 213.000  11.704   3
  -7  11   4 235.766  13.188   2
   7  11  -4 226.500  12.178   1
  -6 -11   4 2.02568 1.07034   2
  -6 -11   4 2.02100 1.35401   3
  -6  11   4 2.17568 1.14402   1
  -6  11   4 -0.1333  1.5263   2
   6  11  -4 1.64842 1.52702   1
  -5 -11   4 164.454   9.373   2
  -5 -11   4 167.402   9.010   3
  -5  11   4 172.008   9.108   1
  -5  11   4 174.036   9.980   2
   5  11  -4 170.920   9.403   1
  -4 -11   4 0.66121 1.10407   3
   4  11  -4 -1.3501  1.1377   1
  -4  11   4 -0.2791  1.1654   2
  -4  11   4 -0.4740  1.0090   1
  -3 -11   4 139.266   7.898   3
   3  11  -4 150.485   8.372   1
  -3  11   4 153.494   8.332   1
  -3  11   4 160.095   8.732   2
  -2 -11   4 60.1413  4.0605   3
   2 -11  -4 65.3771  3.8137   3
   2  11  -4 61.9594  4.2597   1
  -2  11   4 61.5990  4.2895   1
  -2  11   4 61.2478  4.2707   2
   1 -11  -4 15.5602  1.6627   3
  -1 -11   4 12.3632  1.9005   3
  -1  11   4 16.2686  2.2152   1
   1  11  -4 13.6505  1.9698   1
  -1  11   4 14.9883  1.8685   2
   0 -11   4 0.97940 1.00660   3
   0 -11  -4 1.83774 0.87443   3
   0  11  -4 0.32348 0.95087   1
   0  11   4 0.60906 0.72452   2
   0  11   4 0.31596 1.08526   1
  -1 -11  -4 0.50883 0.87029   3
   1  11   4 1.32149 0.62824   2
  -1  11  -4 0.15640 1.27875   2
  -1  11  -4 0.48009 1.04402   1
   1  11   4 -1.4482  0.9954   1
  -2 -11  -4 0.37480 0.86740   3
   2  11   4 -0.8188  1.0766   1
  -2  11  -4 -0.1997  1.3112   2
  -2  11  -4 1.12867 0.97324   1
  -3 -11  -4 147.916   7.506   3
  -3  11  -4 131.228   7.298   1
   3  11   4 133.220   8.075   1
  -3  11  -4 135.395   8.570   2
  -4 -11  -4 5.89309 1.62258   3
  -4  11  -4 5.81476 2.09336   2
   4  11   4 6.46773 1.95405   1
  -4  11  -4 4.53366 1.29548   1
  -5 -11  -4 241.070  12.373   3
  -5  11  -4 241.920  14.005   2
   5  11   4 239.679  13.118   1
  -6 -11  -4 -1.2319  1.4977   3
   6  11   4 3.98937 1.98235   1
  -6  11  -4 -3.9153  1.9905   2
  -7 -11  -4 228.382  12.617   3
  -7  11  -4 241.947  14.232   2
   7  11   4 239.075  13.266   1
  -8 -11  -4 1.96007 1.99267   3
   8  11   4 -0.5743  1.1918   1
  -8  11  -4 0.57864 2.40765   2
  -9 -11  -4 49.5921  5.2410   3
  -9  11  -4 42.9536  5.3864   2
 -10 -11  -4 -2.3343  2.1695   3
 -10  11  -4 -4.3386  2.2910   2
 -11 -11  -4 -1.3889  2.5803   3
 -11  11  -4 4.41333 3.12646   2
 -12 -11  -4 -0.4953  2.6257   3
 -12  11  -4 -3.9039  2.6857   2
 -13 -11  -4 2.77134 3.28392   3
 -13  11  -4 0.71938 3.57264   2
 -14 -12   4 0.40921 2.62775   3
 -14  12   4 0.13113 3.09923   2
 -13 -12   4 29.2690  4.4719   3
 -13  12   4 22.9216  4.7829   2
 -12 -12   4 1.41148 2.37829   3
 -12  12   4 -0.0569  2.7510   2
 -11 -12   4 49.9711  5.2000   3
 -11  12   4 49.8122  6.0061   2
 -10 -12   4 2.98780 2.13625   3
 -10  12   4 -3.4916  2.4643   2
  10  12  -4 -0.6285  1.1574   1
  -9 -12   4 0.77591 1.74563   3
   9  12  -4 1.44391 1.81415   1
  -9  12   4 -0.4614  2.1577   2
  -8 -12   4 6.20977 2.00068   3
   8  12  -4 3.88925 2.14289   1
  -8  12   4 4.31833 2.32272   2
  -7 -12   4 11.2126  2.2986   3
   7  12  -4 8.23445 2.27332   1
  -7  12   4 11.1610  2.6544   2
  -6 -12   4 0.04136 1.32587   3
  -6  12   4 -1.4020  1.1678   1
   6  12  -4 -3.1915  1.4478   1
  -6  12   4 -0.2007  1.6662   2
  -5 -12   4 5.39792 1.69447   3
   5  12  -4 4.04938 1.80709   1
  -5  12   4 5.73795 1.91580   2
  -5  12   4 4.63678 1.53721   1
  -4 -12   4 8.42395 1.67033   3
  -4  12   4 3.78704 1.77646   2
  -4  12   4 8.34920 1.85820   1
   4  12  -4 10.3996  2.1845   1
  -3 -12   4 194.275   9.547   3
  -3  12   4 153.287  10.017   2
   3  12  -4 184.439   9.899   1
  -3  12   4 199.754  10.010   1
   2 -12  -4 13.8382  1.8771   3
  -2 -12   4 13.2803  2.0117   3
  -2  12   4 12.7998  2.1957   1
  -2  12   4 17.0372  2.2271   2
   2  12  -4 15.0387  2.2886   1
   1 -12  -4 417.780  19.570   3
  -1 -12   4 414.543  19.971   3
  -1  12   4 418.324  20.851   1
   1  12  -4 412.122  20.619   1
  -1  12   4 432.686  21.411   2
   0 -12   4 107.196   6.241   3
   0 -12  -4 105.966   5.724   3
   0  12   4 105.140   6.498   1
   0  12   4 107.396   6.004   2
   0  12  -4 98.5774  6.1036   1
   0  12  -4 104.539   6.811   2
  -1 -12  -4 311.592  14.854   3
  -1  12  -4 302.997  16.751   2
  -1  12  -4 307.205  15.501   1
   1  12   4 319.671  16.048   1
  -2 -12  -4 20.4689  2.3704   3
   2  12   4 18.8898  2.7617   1
  -2  12  -4 19.0572  2.9849   2
  -2  12  -4 23.0283  2.4274   1
  -3 -12  -4 181.722   9.614   3
   3  12   4 186.184  10.455   1
  -3  12  -4 177.856   9.570   1
  -3  12  -4 195.471  11.081   2
  -4 -12  -4 2.46816 1.34828   3
  -4  12  -4 2.63536 1.23350   1
   4  12   4 -0.3334  1.6802   1
  -4  12  -4 1.21572 1.67161   2
  -5 -12  -4 10.9120  2.2711   3
   5  12   4 18.3668  3.0074   1
  -5  12  -4 13.7827  3.0037   2
  -6 -12  -4 10.5712  2.4969   3
   6  12   4 11.9415  2.5998   1
  -6  12  -4 3.04705 2.42897   2
  -7 -12  -4 7.38376 2.32975   3
  -7  12  -4 2.34251 2.58799   2
   7  12   4 5.68763 2.44312   1
  -8 -12  -4 1.91243 2.17661   3
   8  12   4 4.03521 2.45407   1
  -8  12  -4 2.37810 2.51912   2
  -9 -12  -4 13.8035  3.0520   3
  -9  12  -4 12.9046  3.5467   2
 -10 -12  -4 1.03776 2.34485   3
 -10  12  -4 -1.4666  2.6577   2
 -11 -12  -4 28.0589  4.5664   3
 -11  12  -4 23.2701  4.5690   2
 -12 -12  -4 0.64774 2.75818   3
 -12  12  -4 -2.6292  2.8454   2
 -14 -13   4 -0.2507  2.5254   3
 -14  13   4 1.45522 3.29052   2
 -13 -13   4 -2.0326  2.4130   3
 -13  13   4 0.89755 3.03949   2
 -12 -13   4 -0.4142  2.2982   3
 -12  13   4 1.70877 3.19808   2
 -11 -13   4 26.3980  4.0020   3
 -11  13   4 25.2728  4.5055   2
 -10 -13   4 7.79079 2.75149   3
 -10  13   4 6.45542 3.19926   2
  10  13  -4 1.98112 2.33710   1
  -9 -13   4 49.4826  4.6957   3
  -9  13   4 60.8198  5.8120   2
   9  13  -4 55.3858  4.9734   1
  -8 -13   4 5.36839 2.11368   3
   8  13  -4 8.00982 2.36768   1
  -8  13   4 7.62160 2.59088   2
  -7 -13   4 196.099  10.559   3
  -7  13   4 190.404  11.600   2
   7  13  -4 186.268  10.885   1
  -6 -13   4 18.7046  2.7097   3
   6  13  -4 15.1838  2.6598   1
  -6  13   4 15.8878  2.9452   2
  -5 -13   4 114.609   6.897   3
  -5  13   4 126.856   7.128   1
  -5  13   4 121.282   7.662   2
   5  13  -4 106.277   7.139   1
  -4 -13   4 40.7996  3.4556   3
  -4  13   4 40.6249  3.4974   1
   4  13  -4 37.9749  3.6670   1
  -4  13   4 39.7312  3.8004   2
  -3 -13   4 87.6233  5.3376   3
   3  13  -4 80.7281  5.5664   1
  -3  13   4 86.2175  5.6200   1
   2 -13  -4 -0.6166  0.9655   3
  -2 -13   4 -0.2941  1.0922   3
   2  13  -4 -0.5306  1.3671   1
  -2  13   4 0.67351 1.40224   1
  -2  13   4 -1.2648  1.1719   2
   1 -13  -4 45.7761  3.2941   3
  -1 -13   4 44.9740  3.6069   3
  -1  13   4 47.0304  3.4723   2
   1  13  -4 41.6204  3.6172   1
  -1  13   4 50.7796  3.9202   1
   0 -13  -4 15.0432  1.9234   3
   0 -13   4 16.3493  2.3730   3
   0  13   4 6.53197 1.90382   1
   0  13  -4 16.8825  2.6802   2
   0  13   4 16.2202  1.9264   2
   0  13  -4 13.2293  2.1979   1
  -1 -13  -4 16.1485  2.0388   3
   1  13   4 14.8216  2.5576   1
  -1  13  -4 16.1573  2.5998   2
  -1  13  -4 15.0267  2.2179   1
  -2 -13  -4 26.3250  2.7224   3
  -2  13  -4 26.1557  2.7909   1
   2  13   4 26.9295  3.2269   1
  -2  13  -4 26.7347  3.4222   2
  -3 -13  -4 120.581   6.967   3
   3  13   4 117.293   7.706   1
  -3  13  -4 127.802   8.242   2
  -3  13  -4 130.752   7.044   1
  -4 -13  -4 2.41602 1.56774   3
  -4  13  -4 1.47273 1.22466   1
   4  13   4 -0.6129  1.7387   1
  -4  13  -4 1.01231 1.85524   2
  -5 -13  -4 209.120  11.338   3
  -5  13  -4 220.183  13.056   2
   5  13   4 217.192  12.251   1
  -6 -13  -4 19.1806  3.1508   3
  -6  13  -4 20.3421  3.9609   2
   6  13   4 25.5972  3.7086   1
  -7 -13  -4 252.600  13.192   3
  -7  13  -4 238.598  14.725   2
   7  13   4 234.676  13.844   1
  -8 -13  -4 2.43650 2.20983   3
  -8  13  -4 4.69977 2.80833   2
   8  13   4 3.99919 2.65194   1
  -9 -13  -4 42.5836  4.7869   3
  -9  13  -4 39.3106  5.3012   2
 -10 -13  -4 5.76810 2.68955   3
 -10  13  -4 2.48013 2.86121   2
 -11 -13  -4 4.26664 2.92096   3
 -11  13  -4 5.72357 3.53089   2
 -12 -13  -4 0.35399 3.09194   3
 -12  13  -4 -3.1172  3.0078   2
 -13 -14   4 13.3009  3.6333   3
 -13  14   4 11.8833  4.0351   2
 -12 -14   4 9.04205 3.08903   3
 -12  14   4 0.38546 2.81198   2
 -11 -14   4 23.1224  4.0468   3
 -11  14   4 27.6558  4.8890   2
 -10 -14   4 4.97371 2.54355   3
  10  14  -4 6.99149 2.73370   1
 -10  14   4 6.10524 3.14342   2
  -9 -14   4 5.82817 2.38526   3
   9  14  -4 6.78799 2.63859   1
  -9  14   4 2.55819 2.58456   2
  -8 -14   4 9.07591 2.31764   3
   8  14  -4 2.33419 2.41361   1
  -8  14   4 3.88592 2.73339   2
  -7 -14   4 2.12912 1.76850   3
  -7  14   4 -0.3150  1.9648   2
   7  14  -4 -2.5592  1.7219   1
  -6 -14   4 12.1234  2.3158   3
  -6  14   4 10.7408  2.8185   2
   6  14  -4 10.2506  2.5764   1
  -5 -14   4 3.17978 1.68949   3
   5  14  -4 0.75515 1.72887   1
  -5  14   4 0.01242 1.54521   1
  -5  14   4 1.36299 1.88379   2
  -4 -14   4 15.3485  2.3452   3
  -4  14   4 9.59393 2.54281   2
   4  14  -4 8.00814 2.14183   1
  -4  14   4 10.8991  2.3039   1
  -3 -14   4 155.955   8.501   3
   3  14  -4 146.498   8.864   1
  -3  14   4 160.489   8.927   1
   2 -14  -4 60.2195  4.0902   3
  -2 -14   4 63.6555  4.4092   3
  -2  14   4 57.4834  4.4161   2
   2  14  -4 55.0538  4.4672   1
  -2  14   4 68.2367  4.7036   1
  -1 -14   4 185.629  10.271   3
   1 -14  -4 194.690   9.938   3
   1  14  -4 202.073  10.677   1
  -1  14   4 201.296  10.866   1
  -1  14   4 192.462  10.660   2
   1  14  -4 194.312  11.194   2
   0 -14  -4 134.747   7.257   3
   0 -14   4 134.642   7.747   3
   0  14   4 130.664   8.071   1
   0  14  -4 136.516   7.800   1
  -1 -14  -4 285.864  13.908   3
   1  14   4 278.300  14.987   1
  -1  14  -4 285.110  14.528   1
  -1  14  -4 285.200  15.762   2
  -2 -14  -4 -0.2764  1.1840   3
   2  14   4 0.94824 1.60124   1
  -2  14  -4 0.71977 1.76213   2
  -2  14  -4 -2.3983  1.1068   1
  -3 -14  -4 114.451   6.535   3
   3  14   4 110.229   7.306   1
  -3  14  -4 111.212   6.484   1
  -3  14  -4 104.703   7.592   2
  -4 -14  -4 2.80989 1.64364   3
  -4  14  -4 4.97827 1.70762   1
  -4  14  -4 6.35637 2.48138   2
   4  14   4 6.32565 2.39706   1
  -5 -14  -4 30.5240  3.6849   3
   5  14   4 36.4585  4.3661   1
  -5  14  -4 33.6620  4.5722   2
  -6 -14  -4 17.1272  2.9151   3
   6  14   4 12.8271  2.9556   1
  -6  14  -4 4.95420 2.85365   2
  -7 -14  -4 8.26950 2.34855   3
   7  14   4 4.08011 2.47886   1
  -7  14  -4 0.59893 2.41136   2
  -8 -14  -4 1.75459 2.14934   3
   8  14   4 8.63477 3.11755   1
  -8  14  -4 3.84090 2.78970   2
  -9 -14  -4 8.37636 3.05275   3
   9  14   4 5.63663 2.79799   1
  -9  14  -4 6.65037 3.35788   2
 -10 -14  -4 5.67122 2.78746   3
 -10  14  -4 1.02833 3.02550   2
 -11 -14  -4 20.7112  4.1706   3
 -11  14  -4 17.3431  4.6333   2
 -12 -14  -4 2.47383 3.01083   3
 -12  14  -4 5.81129 3.76028   2
 -13 -15   4 0.64240 2.78240   3
 -13  15   4 -0.9921  3.2492   2
 -12 -15   4 2.69833 2.49139   3
 -12  15   4 4.42198 3.37594   2
 -11 -15   4 14.3534  3.3337   3
 -11  15   4 14.4806  3.9082   2
 -10 -15   4 7.97479 2.71923   3
 -10  15   4 5.11943 3.10018   2
  10  15  -4 6.20182 2.78501   1
  -9 -15   4 27.4684  3.7612   3
   9  15  -4 31.4189  4.2779   1
  -9  15   4 26.6991  4.4692   2
  -8 -15   4 19.0213  3.2610   3
   8  15  -4 19.6938  3.5625   1
  -8  15   4 20.2210  3.8730   2
  -7 -15   4 107.454   6.733   3
  -7  15   4 77.2068  6.8246   2
   7  15  -4 100.025   6.905   1
  -6 -15   4 28.5071  3.4371   3
   6  15  -4 27.3918  3.7128   1
  -6  15   4 27.6496  3.8575   2
  -5 -15   4 70.2471  5.0195   3
  -5  15   4 69.5418  5.0078   1
   5  15  -4 61.9698  5.1396   1
  -5  15   4 58.9925  5.3521   2
  -4 -15   4 46.2563  3.9059   3
  -4  15   4 43.6652  4.3471   2
  -4  15   4 48.4221  4.2669   1
   4  15  -4 48.6000  4.2814   1
  -3 -15   4 23.8568  2.9683   3
   3  15  -4 34.6156  3.6401   1
  -3  15   4 21.6373  3.0439   2
  -3  15   4 28.5272  3.3584   1
   2 -15  -4 25.1494  2.6890   3
  -2 -15   4 22.6900  2.8288   3
  -2  15   4 17.7838  2.6880   2
  -2  15   4 24.4793  3.2078   1
   2  15  -4 20.5036  2.8719   1
  -1 -15   4 5.18019 1.72208   3
   1 -15  -4 5.49819 1.59334   3
   1  15  -4 4.16609 1.71570   1
  -1  15   4 6.61381 2.06504   1
  -1  15   4 3.31805 1.55208   2
   1  15  -4 3.89397 1.82607   2
   0 -15   4 -1.4451  1.1708   3
   0 -15  -4 0.82531 1.26263   3
   0  15  -4 -0.0814  0.8196   2
   0  15  -4 0.05887 1.45002   1
   0  15   4 -0.9260  1.4864   1
  -1 -15  -4 26.1058  2.7533   3
  -1  15  -4 24.7981  2.9689   1
   1  15   4 22.4474  3.2212   1
  -1  15  -4 24.6903  3.4529   2
  -2 -15  -4 7.17967 1.85351   3
   2  15   4 7.09988 2.29422   1
  -2  15  -4 9.39867 1.97938   1
  -2  15  -4 9.89264 2.59603   2
  -3 -15  -4 30.9018  3.2354   3
   3  15   4 22.1732  3.4448   1
  -3  15  -4 25.9553  3.0177   1
  -3  15  -4 29.4309  3.8208   2
  -4 -15  -4 18.4651  2.7763   3
  -4  15  -4 16.7067  3.3397   2
  -4  15  -4 16.5349  2.4277   1
   4  15   4 10.9787  2.9185   1
  -5 -15  -4 135.503   8.131   3
  -5  15  -4 137.977   9.530   2
   5  15   4 137.516   8.982   1
  -6 -15  -4 18.3011  3.0806   3
  -6  15  -4 19.9172  4.0438   2
   6  15   4 22.4522  3.8686   1
  -7 -15  -4 29.4947  3.9236   3
   7  15   4 42.6631  5.1129   1
  -7  15  -4 40.7846  5.2341   2
  -8 -15  -4 15.3832  3.0776   3
   8  15   4 13.2614  3.3174   1
  -8  15  -4 13.6595  3.6707   2
  -9 -15  -4 21.8274  3.6944   3
  -9  15  -4 18.8987  4.2818   2
   9  15   4 25.1670  4.3940   1
 -10 -15  -4 4.97897 2.92912   3
 -10  15  -4 4.93223 3.53898   2
 -11 -15  -4 4.25921 2.97516   3
 -11  15  -4 1.35307 3.30615   2
 -13 -16   4 11.3295  3.3472   3
 -13  16   4 2.29832 3.59846   2
 -12 -16   4 1.56361 2.64754   3
 -12  16   4 8.54959 3.63516   2
 -11 -16   4 6.13883 2.76779   3
 -11  16   4 3.08769 3.21416   2
 -10 -16   4 12.5832  3.1951   3
 -10  16   4 14.1171  3.8604   2
  10  16  -4 11.2040  3.4734   1
  -9 -16   4 19.6820  3.3817   3
   9  16  -4 17.5351  3.6785   1
  -9  16   4 10.4355  3.3501   2
  -8 -16   4 8.24157 2.58489   3
   8  16  -4 10.7179  3.3068   1
  -8  16   4 10.2441  3.3455   2
  -7 -16   4 5.95748 2.28948   3
  -7  16   4 0.12535 2.35469   2
   7  16  -4 4.93326 2.62823   1
  -6 -16   4 0.80114 1.94759   3
   6  16  -4 4.25024 2.50120   1
  -6  16   4 2.45919 2.43434   2
  -5 -16   4 5.14625 1.90031   3
   5  16  -4 3.62477 2.29095   1
  -5  16   4 -1.0688  1.8619   2
  -5  16   4 0.13400 1.79951   1
  -4 -16   4 53.2966  4.2325   3
  -4  16   4 48.3099  4.9311   2
   4  16  -4 50.8696  4.5535   1
  -4  16   4 44.6403  4.4449   1
  -3 -16   4 13.6428  2.5320   3
  -3  16   4 14.8922  2.7242   2
   3  16  -4 10.5485  2.5313   1
  -3  16   4 11.1990  2.6513   1
  -2 -16   4 177.273   9.929   3
   2 -16  -4 176.760   9.530   3
  -2  16   4 178.316  10.232   2
  -2  16   4 181.444  10.350   1
   2  16  -4 185.260  10.486   2
   2  16  -4 172.338  10.184   1
   1 -16  -4 72.5979  4.7838   3
  -1 -16   4 60.4295  4.9241   3
  -1  16   4 73.9620  5.4111   1
   1  16  -4 73.8224  5.3359   2
   1  16  -4 64.9859  5.0941   1
   0 -16  -4 80.0025  5.1027   3
   0 -16   4 70.2246  5.3797   3
   0  16   4 82.1713  5.8934   1
   0  16  -4 78.9314  5.5328   1
  -1 -16  -4 171.017   9.091   3
  -1  16  -4 178.107  10.465   2
  -1  16  -4 166.355   9.508   1
   1  16   4 154.406   9.804   1
  -2 -16  -4 89.7649  5.3242   3
   2  16   4 71.2017  5.8716   1
  -2  16  -4 68.8346  5.8580   2
  -2  16  -4 71.6113  5.2611   1
  -3 -16  -4 43.8181  3.6721   3
   3  16   4 49.2238  4.3825   1
  -3  16  -4 30.0155  4.2429   2
  -3  16  -4 35.1887  3.6708   1
  -4 -16  -4 5.98036 2.17313   3
  -4  16  -4 6.87411 2.83626   2
   4  16   4 9.94556 2.59080   1
  -4  16  -4 5.60106 2.24497   1
  -5 -16  -4 17.6388  2.9822   3
   5  16   4 18.8919  3.5560   1
  -5  16  -4 17.5275  3.7556   2
  -6 -16  -4 3.98944 2.03277   3
   6  16   4 3.46511 2.35501   1
  -6  16  -4 -1.9994  2.4046   2
  -7 -16  -4 1.19475 1.95574   3
  -7  16  -4 -1.9441  2.1144   2
   7  16   4 0.68470 2.31381   1
  -8 -16  -4 0.80045 2.33970   3
  -8  16  -4 -4.1215  2.2336   2
   8  16   4 -0.7011  2.5499   1
  -9 -16  -4 3.35519 2.34661   3
   9  16   4 0.83722 3.02784   1
  -9  16  -4 0.28112 2.92017   2
 -10 -16  -4 3.30170 2.68404   3
 -10  16  -4 3.22747 3.22545   2
 -11 -16  -4 7.68103 3.29894   3
 -11  16  -4 3.61240 3.66685   2
 -12 -17   4 -2.7534  2.5010   3
 -12  17   4 -0.6432  3.0490   2
 -11 -17   4 6.88201 2.94038   3
 -11  17   4 7.33904 3.52090   2
 -10 -17   4 12.0847  3.1979   3
  10  17  -4 15.7456  3.8648   1
 -10  17   4 17.2487  4.0555   2
  -9 -17   4 19.2830  3.4676   3
   9  17  -4 9.17571 3.37241   1
  -9  17   4 9.55427 3.53956   2
  -8 -17   4 29.7804  4.1554   3
   8  17  -4 37.6812  4.9453   1
  -8  17   4 43.2645  5.3944   2
  -7 -17   4 27.8943  3.9423   3
   7  17  -4 36.6181  4.6262   1
  -7  17   4 36.7983  4.8292   2
  -6 -17   4 92.8834  6.5515   3
   6  17  -4 87.4946  6.8126   1
  -6  17   4 88.5527  6.9456   2
  -5 -17   4 39.8083  4.2181   3
  -5  17   4 40.3287  4.3316   1
   5  17  -4 32.8090  4.2598   1
  -5  17   4 35.9547  4.3611   2
  -4 -17   4 58.6694  4.7415   3
  -4  17   4 48.3058  5.2704   2
   4  17  -4 64.1536  5.1812   1
  -4  17   4 67.9977  5.1615   1
  -3 -17   4 2.76504 1.90248   3
  -3  17   4 0.57336 1.93881   2
   3  17  -4 5.24942 2.31135   1
  -3  17   4 3.82739 2.35534   1
  -2 -17   4 24.7598  3.2294   3
  -2  17   4 21.6021  2.9984   2
  -2  17   4 22.1081  3.3216   1
   2  17  -4 29.9388  3.7173   1
   1 -17  -4 23.3944  2.8751   3
  -1 -17   4 22.0265  3.0922   3
   1  17  -4 10.2385  2.8430   1
   1  17  -4 16.4362  2.9437   2
  -1  17   4 25.2050  3.4777   1
   0 -17  -4 7.27170 1.99576   3
   0  17  -4 1.26880 2.03979   1
   0  17   4 12.6940  2.7907   1
   0  17  -4 2.09472 2.18757   2
  -1 -17  -4 2.17195 1.74750   3
  -1  17  -4 1.14041 2.21064   2
   1  17   4 0.73551 2.05197   1
  -1  17  -4 0.58284 1.83962   1
  -2 -17  -4 1.65989 1.64242   3
  -2  17  -4 -1.3047  1.7727   1
  -2  17  -4 1.65830 2.01118   2
   2  17   4 -0.0839  1.5817   1
  -3 -17  -4 3.95154 1.94524   3
  -3  17  -4 9.24832 2.87487   2
  -3  17  -4 4.66628 2.05172   1
   3  17   4 3.54045 2.37858   1
  -4 -17  -4 59.6014  4.8953   3
  -4  17  -4 66.4314  6.0830   2
   4  17   4 55.4905  5.4284   1
  -5 -17  -4 27.6431  3.5685   3
   5  17   4 34.5721  4.5977   1
  -5  17  -4 29.4692  4.5846   2
  -6 -17  -4 33.5678  3.9745   3
  -6  17  -4 28.6721  4.6988   2
   6  17   4 35.0445  4.7974   1
  -7 -17  -4 4.40006 2.34126   3
   7  17   4 9.82647 3.17794   1
  -7  17  -4 6.39156 3.18520   2
  -8 -17  -4 29.1434  4.0295   3
   8  17   4 26.8937  4.6951   1
  -8  17  -4 21.7451  4.6071   2
  -9 -17  -4 7.66417 2.84474   3
  -9  17  -4 15.6277  4.2585   2
   9  17   4 7.95645 3.63369   1
 -10 -17  -4 8.41849 3.11353   3
 -10  17  -4 12.5758  4.1681   2
 -11 -17  -4 5.38753 3.36402   3
 -11  17  -4 5.23855 3.94892   2
 -12 -18   4 6.69370 3.19679   3
 -12  18   4 -0.4604  3.2787   2
 -11 -18   4 4.39493 2.89915   3
  11  18  -4 5.64971 3.53048   1
 -11  18   4 0.45669 3.03636   2
 -10 -18   4 13.7250  3.4080   3
  10  18  -4 15.2443  4.0361   1
 -10  18   4 9.51458 3.77482   2
  -9 -18   4 5.48155 2.66203   3
   9  18  -4 3.21882 2.98108   1
  -9  18   4 4.02257 3.16787   2
  -8 -18   4 1.94761 2.24775   3
   8  18  -4 6.64849 3.01463   1
  -8  18   4 6.56986 3.16955   2
  -7 -18   4 -0.4909  2.0752   3
  -7  18   4 0.37922 2.48020   2
   7  18  -4 0.33347 2.51030   1
  -6 -18   4 3.41118 2.39769   3
   6  18  -4 3.80082 2.63915   1
  -6  18   4 3.57353 2.57625   2
  -5 -18   4 24.5663  3.6241   3
   5  18  -4 21.1995  3.6818   1
  -5  18   4 25.1169  3.5781   1
  -5  18   4 25.3260  3.9974   2
  -4 -18   4 31.0074  3.7063   3
  -4  18   4 28.7916  3.9093   1
   4  18  -4 27.8498  3.8960   1
  -4  18   4 16.4765  2.9946   2
  -3 -18   4 4.61004 2.10941   3
  -3  18   4 0.96599 2.28161   1
  -3  18   4 3.20496 2.16354   2
   3  18  -4 6.71305 2.51722   1
  -2 -18   4 77.9306  5.5982   3
  -2  18   4 71.4211  5.8725   1
   2  18  -4 68.4183  5.7194   1
   1 -18  -4 57.3860  5.1409   3
  -1 -18   4 86.4927  5.8475   3
   1  18  -4 78.5723  5.9127   2
  -1  18   4 69.6238  5.9263   1
   1  18  -4 87.4947  6.0737   1
   0 -18  -4 179.363   9.994   3
   0  18   4 183.517  11.043   1
   0  18  -4 180.145  10.656   1
   0  18  -4 194.284  11.352   2
  -1 -18  -4 73.0098  5.1520   3
  -1  18  -4 62.1983  5.6728   2
  -1  18  -4 67.0396  5.2834   1
   1  18   4 70.8447  5.8497   1
  -2 -18  -4 98.6888  6.2952   3
  -2  18  -4 89.9186  6.3655   1
  -2  18  -4 96.5894  7.2142   2
   2  18   4 88.7701  6.9715   1
  -3 -18  -4 1.60736 1.91953   3
  -3  18  -4 4.92523 2.60855   2
   3  18   4 1.77740 2.28480   1
  -3  18  -4 1.38468 1.86145   1
  -4 -18  -4 14.6819  2.9389   3
  -4  18  -4 20.7402  3.9891   2
   4  18   4 12.2957  3.2487   1
  -5 -18  -4 3.80743 2.13167   3
   5  18   4 -1.0154  2.3822   1
  -5  18  -4 1.85409 2.65845   2
  -6 -18  -4 0.99462 1.91876   3
  -6  18  -4 -1.3117  2.2648   2
   6  18   4 3.26244 2.66168   1
  -7 -18  -4 0.68490 2.22866   3
  -7  18  -4 2.02780 2.68910   2
   7  18   4 -2.4029  2.3677   1
  -8 -18  -4 0.49878 2.54984   3
  -8  18  -4 4.11842 3.32440   2
   8  18   4 -1.5581  2.8712   1
  -9 -18  -4 -3.3664  2.4162   3
  -9  18  -4 -1.8978  3.1108   2
   9  18   4 -2.1295  2.8879   1
 -10 -18  -4 11.2175  3.7429   3
 -10  18  -4 14.2445  4.2693   2
 -11 -19   4 0.87863 2.84865   3
 -11  19   4 -1.2896  3.2187   2
  11  19  -4 -7.1424  2.7261   1
 -10 -19   4 8.69256 3.13235   3
 -10  19   4 9.43649 3.54967   2
  10  19  -4 6.25502 3.49986   1
  -9 -19   4 8.67904 2.90524   3
  -9  19   4 6.48104 3.49117   2
   9  19  -4 1.30638 2.94501   1
  -8 -19   4 27.3929  4.1099   3
   8  19  -4 18.3226  4.0364   1
  -8  19   4 26.1327  4.5643   2
  -7 -19   4 -0.1126  2.1861   3
  -7  19   4 1.77215 2.48943   2
   7  19  -4 -0.8043  2.6146   1
  -6 -19   4 51.1065  5.3691   3
  -6  19   4 51.2694  5.7011   2
   6  19  -4 58.7929  5.4728   1
  -5 -19   4 25.3899  3.7703   3
  -5  19   4 29.3301  4.2097   2
   5  19  -4 23.4965  3.8341   1
  -4 -19   4 87.7620  6.3777   3
   4  19  -4 84.1295  6.7025   1
  -4  19   4 93.2948  6.8203   1
  -3 -19   4 12.7926  2.7672   3
  -3  19   4 14.2838  3.1542   1
   3  19  -4 7.09715 2.73044   1
  -2 -19   4 11.5590  2.8521   3
   2  19  -4 12.8852  3.1175   1
  -2  19   4 13.0417  3.0358   1
   1 -19  -4 0.88932 1.83957   3
  -1 -19   4 4.33973 2.12126   3
   1  19  -4 0.48616 2.38522   1
  -1  19   4 1.89985 2.29432   1
   0 -19  -4 3.55889 1.92063   3
   0  19   4 6.31250 2.59811   1
   0  19  -4 3.74746 2.43601   2
   0  19  -4 2.49210 2.40350   1
  -1 -19  -4 3.84402 2.04550   3
   1  19   4 6.44209 2.78368   1
  -1  19  -4 2.54241 2.16096   1
  -1  19  -4 2.53177 2.00250   2
  -2 -19  -4 12.1331  2.5589   3
   2  19   4 7.69402 2.91160   1
  -2  19  -4 12.7199  2.8592   1
  -2  19  -4 9.60613 3.05426   2
  -3 -19  -4 9.12271 2.49951   3
   3  19   4 1.75258 2.48916   1
  -3  19  -4 -0.0555  2.5099   2
  -3  19  -4 0.95781 2.19183   1
  -4 -19  -4 51.7810  4.6859   3
   4  19   4 47.3848  5.6289   1
  -4  19  -4 70.1992  6.2866   2
  -5 -19  -4 6.44804 2.38375   3
  -5  19  -4 2.46812 2.69784   2
   5  19   4 3.42437 2.74760   1
  -6 -19  -4 45.8565  4.8995   3
   6  19   4 41.6749  5.5629   1
  -6  19  -4 52.3052  6.3106   2
  -7 -19  -4 4.59106 2.53824   3
   7  19   4 10.6863  3.6406   1
  -7  19  -4 4.16104 3.14990   2
  -8 -19  -4 14.8367  3.4315   3
  -8  19  -4 18.5433  4.6228   2
   8  19   4 14.7264  4.4158   1
  -9 -19  -4 1.01139 2.75899   3
   9  19   4 -0.9165  3.4522   1
  -9  19  -4 1.42757 3.26204   2
 -10 -19  -4 16.2737  3.9095   3
 -10  19  -4 12.6632  4.5274   2
 -11 -20   4 1.07773 2.97731   3
  11  20  -4 3.50973 3.20114   1
 -11  20   4 -1.0566  3.3956   2
 -10 -20   4 4.60024 3.08558   3
 -10  20   4 5.58042 3.80710   2
  10  20  -4 14.0878  4.0527   1
  -9 -20   4 -0.2439  2.3280   3
  -9  20   4 4.08915 3.38080   2
   9  20  -4 -1.2080  2.8185   1
  -8 -20   4 -3.8153  2.1269   3
   8  20  -4 3.55942 3.00826   1
  -8  20   4 -2.3679  2.8428   2
  -7 -20   4 -3.1760  1.8643   3
   7  20  -4 -1.8098  2.6458   1
  -7  20   4 3.58915 2.83509   2
  -6 -20   4 5.37157 2.44993   3
   6  20  -4 4.10124 2.80240   1
  -6  20   4 3.69939 2.77881   2
  -5 -20   4 3.15301 2.43236   3
   5  20  -4 -2.2043  2.1795   1
  -5  20   4 -3.5508  2.2241   2
  -4 -20   4 12.1892  2.8711   3
  -4  20   4 18.3627  3.5512   1
   4  20  -4 11.6765  3.0936   1
  -4  20   4 10.2202  2.8520   2
  -3 -20   4 8.12259 2.58576   3
   3  20  -4 7.05670 2.91472   1
  -3  20   4 0.66655 2.51649   1
  -2 -20   4 33.7548  4.1939   3
  -2  20   4 35.7036  4.6338   1
   2  20  -4 32.7972  4.3348   1
  -1 -20   4 7.30858 2.54879   3
   1 -20  -4 0.21849 1.67270   3
  -1  20   4 -0.1744  2.3725   1
   1  20  -4 4.57322 2.45098   1
   0 -20  -4 54.0820  4.6463   3
   0  20   4 55.9258  5.4205   1
   0  20  -4 59.5382  5.1725   1
  -1 -20  -4 10.7659  2.5893   3
   1  20   4 16.1453  3.4075   1
  -1  20  -4 9.43695 2.82418   1
  -2 -20  -4 27.6605  3.6326   3
   2  20   4 19.1642  3.6582   1
  -2  20  -4 28.2401  3.8606   1
  -2  20  -4 29.5785  4.3066   2
  -3 -20  -4 -1.4748  1.9914   3
   3  20   4 -1.7903  2.2290   1
  -3  20  -4 1.80676 2.18192   1
  -3  20  -4 2.79480 2.79091   2
  -4 -20  -4 10.7227  2.8726   3
  -4  20  -4 16.5708  3.8185   2
   4  20   4 7.29327 3.08526   1
  -5 -20  -4 3.49331 2.44031   3
   5  20   4 2.04703 2.89889   1
  -5  20  -4 5.71459 3.16985   2
  -6 -20  -4 -0.9392  2.0345   3
  -6  20  -4 0.35614 2.93069   2
   6  20   4 -1.2583  2.7510   1
  -7 -20  -4 -2.1401  2.0702   3
   7  20   4 -0.2252  2.8738   1
  -7  20  -4 2.68238 3.05320   2
  -8 -20  -4 -1.5656  2.2032   3
   8  20   4 3.15417 3.53273   1
  -8  20  -4 -0.2590  3.3941   2
  -9 -20  -4 2.16157 2.68069   3
   9  20   4 -2.9577  3.5639   1
  -9  20  -4 -3.1483  3.2846   2
 -10 -21   4 -0.0763  2.8469   3
 -10  21   4 2.79915 3.53177   2
  10  21  -4 5.43825 3.84119   1
  -9 -21   4 0.24684 2.40534   3
   9  21  -4 -1.2528  2.8470   1
  -9  21   4 2.25448 3.32834   2
  -8 -21   4 31.5282  4.5945   3
   8  21  -4 27.5067  4.9350   1
  -8  21   4 24.4593  4.7099   2
  -7 -21   4 -2.1063  2.3076   3
   7  21  -4 0.25336 2.91169   1
  -7  21   4 -2.0659  2.3719   2
  -6 -21   4 20.5450  3.6579   3
   6  21  -4 23.9440  4.3816   1
  -6  21   4 23.6770  4.1795   2
  -5 -21   4 -0.0823  2.1894   3
  -5  21   4 3.37216 2.68940   2
   5  21  -4 0.12006 2.47591   1
  -4 -21   4 31.5790  4.2703   3
  -4  21   4 37.9126  4.8321   1
   4  21  -4 37.6053  4.9032   1
  -3 -21   4 2.44677 2.51894   3
   3  21  -4 0.00203 2.30309   1
  -3  21   4 3.52882 2.65781   1
  -2 -21   4 22.2868  3.6270   3
  -2  21   4 17.1366  3.7209   1
   2  21  -4 16.5218  3.5767   1
   1 -21  -4 -1.4067  1.9020   3
  -1 -21   4 0.85708 2.19671   3
  -1  21   4 2.01516 2.53562   1
   1  21  -4 2.13497 2.53172   1
   0 -21  -4 0.84430 1.87386   3
   0  21   4 -1.6395  2.2490   1
   0  21  -4 -3.3540  2.3322   1
  -1 -21  -4 3.30939 2.16711   3
  -1  21  -4 -1.9379  1.7625   2
   1  21   4 0.02378 2.40359   1
  -1  21  -4 -3.4640  2.0797   1
  -2 -21  -4 -0.7261  2.0400   3
   2  21   4 2.39775 2.61915   1
  -2  21  -4 2.34481 2.71922   2
  -2  21  -4 2.37372 2.61739   1
  -3 -21  -4 -4.6736  1.8810   3
  -3  21  -4 -1.2023  2.5937   2
   3  21   4 -2.1556  2.2942   1
  -3  21  -4 0.70979 2.58154   1
  -4 -21  -4 42.9836  4.7655   3
  -4  21  -4 42.7375  5.5927   2
   4  21   4 33.6373  4.9803   1
  -5 -21  -4 0.64918 2.30643   3
   5  21   4 1.55685 2.92560   1
  -5  21  -4 -1.4772  2.7820   2
  -6 -21  -4 36.5337  4.6759   3
  -6  21  -4 31.3188  5.2853   2
   6  21   4 42.5221  5.7328   1
  -7 -21  -4 2.44579 2.63063   3
  -7  21  -4 1.58714 3.40455   2
   7  21   4 2.20541 3.16737   1
  -8 -21  -4 16.5640  3.7159   3
   8  21   4 12.4850  4.2854   1
  -8  21  -4 9.21205 4.11995   2
  -9 -21  -4 3.63776 3.21777   3
   9  21   4 0.80203 3.63315   1
  -9  21  -4 1.04145 3.57531   2
  -9 -22   4 2.51437 2.67648   3
   9  22  -4 4.21850 3.65015   1
  -9  22   4 3.83863 3.56342   2
  -8 -22   4 -1.0942  2.4453   3
  -8  22   4 -0.3476  3.1523   2
   8  22  -4 0.23392 2.95512   1
  -7 -22   4 0.18025 2.42765   3
   7  22  -4 0.92735 2.90151   1
  -7  22   4 3.19951 3.21494   2
  -6 -22   4 -2.0404  1.9924   3
   6  22  -4 -3.1364  2.5475   1
  -6  22   4 -0.0573  2.5044   2
  -5 -22   4 -0.8055  2.2629   3
   5  22  -4 1.28316 2.93998   1
  -4 -22   4 13.8677  3.2848   3
   4  22  -4 14.6389  3.6695   1
  -4  22   4 12.1867  3.5897   1
  -3 -22   4 3.34241 2.38548   3
  -3  22   4 -4.0054  2.2127   1
   3  22  -4 -2.1018  2.3717   1
  -2 -22   4 43.3787  5.0963   3
  -2  22   4 44.4826  5.5420   1
   2  22  -4 49.6688  5.5355   1
  -1 -22   4 8.54798 2.90340   3
   1 -22  -4 5.30276 2.53869   3
   1  22  -4 7.44581 3.02421   1
  -1  22   4 8.63391 3.13970   1
   0 -22  -4 44.1464  4.7377   3
   0  22   4 50.1621  5.8277   1
   0  22  -4 43.4877  5.1430   1
  -1 -22  -4 2.73943 2.27998   3
   1  22   4 2.30268 2.76677   1
  -1  22  -4 -2.6140  2.3390   1
  -2 -22  -4 36.0578  4.4223   3
  -2  22  -4 34.4155  4.7700   2
   2  22   4 44.0058  5.4685   1
  -2  22  -4 30.9282  4.3390   1
  -3 -22  -4 0.31544 2.40291   3
   3  22   4 3.71050 2.86333   1
  -3  22  -4 1.25088 2.85188   2
  -4 -22  -4 21.1036  3.7053   3
  -4  22  -4 18.7982  4.1290   2
   4  22   4 13.9718  3.8072   1
  -5 -22  -4 1.71289 2.44279   3
  -5  22  -4 -0.4024  2.9319   2
   5  22   4 1.58545 2.91560   1
  -6 -22  -4 -0.7770  2.2415   3
   6  22   4 3.42737 3.38223   1
  -6  22  -4 0.38107 3.16995   2
  -7 -22  -4 3.94108 2.92695   3
  -7  22  -4 0.80027 3.49135   2
   7  22   4 1.18993 3.51684   1
  -8 -22  -4 -1.4770  2.6037   3
   8  22   4 -2.4339  3.5601   1
  -8  22  -4 -3.7242  3.1571   2
  -9 -23   4 2.48143 3.06124   3
   9  23  -4 5.52408 3.95913   1
  -9  23   4 1.02630 3.50011   2
  -8 -23   4 14.0390  3.7642   3
  -8  23   4 13.0003  4.0712   2
   8  23  -4 23.3190  4.8057   1
  -7 -23   4 2.03762 2.79251   3
   7  23  -4 -0.5218  2.8176   1
  -7  23   4 -2.1094  2.8030   2
  -6 -23   4 21.4919  3.9394   3
   6  23  -4 16.1471  4.0611   1
  -5 -23   4 -1.1552  2.1669   3
   5  23  -4 -2.8801  2.5717   1
  -4 -23   4 23.7576  3.9696   3
  -4  23   4 13.0791  4.0445   1
   4  23  -4 10.3813  3.5605   1
  -3 -23   4 -3.0735  2.0169   3
   3  23  -4 2.90100 2.81730   1
  -3  23   4 0.86588 2.92814   1
  -2 -23   4 4.08343 2.63878   3
   2  23  -4 5.12909 3.06156   1
  -2  23   4 8.28793 3.51789   1
   1 -23  -4 -1.8179  1.7898   3
  -1  23   4 -0.2519  2.6851   1
   1  23  -4 3.38960 2.89670   1
   0 -23  -4 3.76167 2.47313   3
   0  23   4 3.50489 3.12618   1
   0  23  -4 -1.3385  2.4174   1
  -1 -23  -4 0.20062 2.37540   3
  -1  23  -4 -3.2295  2.2851   1
   1  23   4 0.77890 2.78721   1
  -2 -23  -4 5.78593 2.78593   3
  -2  23  -4 9.53691 3.13617   1
   2  23   4 7.54036 3.46089   1
  -3 -23  -4 3.57778 2.67356   3
   3  23   4 0.04458 2.95062   1
  -3  23  -4 0.69832 2.85333   2
  -4 -23  -4 23.6062  3.9406   3
  -4  23  -4 22.7574  4.5000   2
   4  23   4 21.3703  4.5591   1
  -5 -23  -4 5.33781 2.79589   3
  -5  23  -4 4.34197 3.47392   2
   5  23   4 6.48485 3.58629   1
  -6 -23  -4 16.9814  3.7335   3
  -6  23  -4 20.2251  4.7160   2
   6  23   4 18.7697  4.6102   1
  -7 -23  -4 1.35794 2.87185   3
  -7  23  -4 -5.0160  3.2064   2
   7  23   4 1.04854 3.69730   1
  -8 -24   4 -0.9710  2.6023   3
   8  24  -4 -4.9036  2.9391   1
  -8  24   4 -3.7808  2.9820   2
  -7 -24   4 -2.5955  2.4489   3
   7  24  -4 -0.2254  3.1647   1
  -6 -24   4 -0.9475  2.5822   3
   6  24  -4 -1.7446  3.1326   1
  -5 -24   4 0.23726 2.66034   3
   5  24  -4 0.13356 2.97187   1
  -4 -24   4 5.23750 2.80971   3
   4  24  -4 -3.8309  2.5922   1
  -3 -24   4 0.40597 2.69568   3
  -3  24   4 -1.1149  2.8546   1
   3  24  -4 6.17048 3.23403   1
  -2 -24   4 14.1092  3.5240   3
   2  24  -4 28.4773  4.4604   1
  -2  24   4 17.5486  4.2962   1
  -1  24   4 3.40603 3.07990   1
   1  24  -4 8.06572 3.49953   1
   0 -24  -4 22.7164  3.8800   3
   0  24  -4 24.0530  4.3109   1
   0  24   4 27.7280  4.7850   1
  -1 -24  -4 1.74698 2.46243   3
   1  24   4 4.75807 3.17059   1
  -1  24  -4 2.53695 2.76408   1
  -2 -24  -4 18.7725  3.7012   3
   2  24   4 17.1712  4.3275   1
  -2  24  -4 18.3922  4.0748   1
  -3 -24  -4 0.42769 2.52605   3
   3  24   4 -0.2554  2.9658   1
  -4 -24  -4 24.3626  4.2237   3
  -4  24  -4 20.4124  4.5949   2
   4  24   4 19.9813  4.4678   1
  -5 -24  -4 1.31423 2.65341   3
   5  24   4 3.55225 3.30455   1
  -5  24  -4 -0.3465  3.2793   2
  -6 -24  -4 3.50057 3.01337   3
   6  24   4 1.16551 3.79841   1
  -6  24  -4 1.44766 3.44694   2
  -7 -25   4 6.67353 3.24824   3
   7  25  -4 1.75358 3.50978   1
  -6 -25   4 7.84047 3.32934   3
   6  25  -4 14.0185  4.2800   1
  -5 -25   4 1.62390 2.97176   3
   5  25  -4 0.65275 3.17239   1
  -4 -25   4 7.68122 3.15565   3
   4  25  -4 8.67997 3.68353   1
  -3 -25   4 5.67744 3.05770   3
   3  25  -4 1.89595 3.17655   1
  -3  25   4 4.22317 3.51598   1
  -2 -25   4 -1.6612  2.4999   3
   2  25  -4 7.10965 3.35686   1
  -2  25   4 3.88526 3.49235   1
   1  25  -4 2.48117 3.27190   1
  -1  25   4 -5.9451  3.1347   1
   0 -25  -4 -1.2133  2.3761   3
   0  25   4 2.02218 3.24920   1
   0  25  -4 0.73249 2.96913   1
  -1 -25  -4 -3.2158  2.3490   3
   1  25   4 3.04772 3.40296   1
  -1  25  -4 1.77225 2.90739   1
  -2 -25  -4 1.57486 2.52767   3
  -2  25  -4 -0.2429  3.1810   1
   2  25   4 -0.3727  2.9996   1
  -3 -25  -4 -1.9640  2.5290   3
   3  25   4 3.88515 3.67684   1
  -4 -25  -4 9.86469 3.54495   3
   4  25   4 13.1138  4.1545   1
  -5 -25  -4 5.81097 2.95760   3
  -5  25  -4 -0.8720  3.4709   2
   5  25   4 1.66607 3.34232   1
  -5 -26   4 -0.8556  2.8669   3
   5  26  -4 0.61517 3.45805   1
  -4 -26   4 1.04135 2.84228   3
   4  26  -4 -0.1594  3.3992   1
  -3 -26   4 6.00758 3.29858   3
   3  26  -4 7.07645 3.62292   1
  -3  26   4 14.3186  4.2632   1
  -2 -26   4 7.04257 3.07803   3
  -2  26   4 1.71661 3.79981   1
   2  26  -4 8.29133 3.54204   1
   1  26  -4 5.95284 3.64798   1
  -1  26   4 -1.1220  3.1022   1
   0 -26  -4 10.7093  3.4040   3
   0  26  -4 9.73143 3.91019   1
   0  26   4 11.1745  4.0151   1
  -1 -26  -4 0.94024 2.77739   3
   1  26   4 4.94628 3.60603   1
  -1  26  -4 1.01090 3.27942   1
  -2 -26  -4 5.35692 3.10834   3
   2  26   4 7.63018 3.87648   1
  -3 -26  -4 3.62416 3.11378   3
   3  26   4 2.74277 3.46304   1
  -4 -26  -4 1.55479 2.64434   3
   4  26   4 6.42137 4.14390   1
  -4 -27   4 -1.8044  3.0165   3
  -3 -27   4 3.02181 3.09626   3
   3  27  -4 1.83056 3.46327   1
  -2  27   4 -2.6420  3.2522   1
   2  27  -4 0.28981 3.25715   1
   1  27  -4 -1.6358  3.5540   1
  -1  27   4 -1.7917  3.7739   1
   0  27  -4 -2.9266  3.2061   1
   0  27   4 -4.4367  3.1581   1
  -1 -27  -4 -1.4758  2.7373   3
   1  27   4 4.97869 3.79915   1
  -1  27  -4 3.01955 3.49138   1
  -2 -27  -4 2.18354 3.07093   3
   2  27   4 0.42133 3.56580   1
 -15   0   5 3.64664 3.11143   3
 -14   0   5 3.36165 2.81910   3
 -13   0   5 4.83075 2.81894   2
 -13   0   5 2.59297 2.74546   3
 -12   0   5 -2.6759  2.3320   2
 -12   0   5 -0.0601  1.9985   3
 -11   0   5 37.5323  4.6078   2
 -11   0   5 34.5903  4.4795   3
 -10   0   5 -0.1294  1.7295   3
 -10   0   5 1.04791 1.85058   2
  -9   0   5 93.9942  6.2199   2
  -9   0   5 83.5750  5.8075   3
  -8   0   5 -0.4323  0.6405   3
  -8   0   5 -0.0532  1.3463   2
  -7   0   5 724.226  33.055   3
  -7   0   5 729.414  36.202   2
   7   0  -5 701.703  33.696   1
   6   0  -5 -0.3092  0.6802   1
  -6   0   5 0.75230 0.81541   3
  -6   0   5 -1.5811  0.7897   2
  -5   0   5 682.555  34.435   2
   5   0  -5 685.195  32.413   1
  -5   0   5 696.642  31.197   3
  -4   0   5 0.35291 0.70732   2
   4   0  -5 -0.5749  0.6417   1
  -4   0   5 0.19273 0.63159   1
  -4   0   5 0.66584 0.52376   3
   3   0  -5 3875.60  182.98   1
  -3   0   5 3869.39  193.41   2
  -3   0   5 4103.59  182.97   1
  -3   0   5 4052.73  175.68   3
  -2   0   5 0.42358 0.60995   2
  -2   0   5 0.43790 0.64933   1
  -1   0   5 1491.45   70.10   1
  -1   0   5 1530.38   73.97   2
   0   0   5 -0.1388  0.6045   1
   0   0   5 -0.2469  0.5096   2
   1   0   5 2.60926 0.97035   1
   2   0   5 0.67123 0.64029   1
   3   0   5 244.811  12.255   1
  -4   0  -5 0.88203 0.86601   2
   4   0   5 0.23665 0.74010   1
  -5   0  -5 674.336  33.347   2
   5   0   5 649.161  31.384   1
   6   0   5 -0.7413  0.7097   1
  -6   0  -5 -0.1517  1.0166   2
  -7   0  -5 357.675  18.847   2
  -8   0  -5 -1.8395  1.2853   2
  -9   0  -5 295.800  16.037   3
  -9   0  -5 290.894  16.034   2
 -10   0  -5 -6.4550  1.8747   3
 -11   0  -5 8.10606 3.31470   3
 -12   0  -5 2.63741 2.82291   3
 -13   0  -5 -2.4817  3.0111   3
 -14   0  -5 -0.4681  3.2519   3
 -15  -1   5 25.9548  4.6132   3
 -15   1   5 25.2944  4.4373   3
 -14  -1   5 -1.0493  2.4062   3
 -14   1   5 4.16610 2.96990   3
 -14   1   5 -0.5459  2.6082   2
 -13  -1   5 83.8647  6.8077   3
 -13  -1   5 83.6389  6.8404   2
 -13   1   5 75.6250  6.8167   2
 -13   1   5 99.5461  7.1267   3
 -12  -1   5 -3.0261  2.0675   3
 -12  -1   5 -0.4839  2.0870   2
 -12   1   5 -2.0846  1.9204   3
 -12   1   5 -4.9880  2.2450   2
 -11  -1   5 179.586  10.916   2
 -11  -1   5 179.142  10.476   3
 -11   1   5 165.284  10.915   2
 -11   1   5 191.644  10.633   3
 -10  -1   5 1.79050 1.88496   2
 -10  -1   5 0.01402 1.69122   3
 -10   1   5 1.39233 1.73903   3
 -10   1   5 -2.6999  1.7577   2
  -9  -1   5 39.2909  3.5537   2
  -9  -1   5 36.7698  3.8262   3
  -9   1   5 23.1592  3.2024   3
  -9   1   5 44.5954  3.8472   2
  -8  -1   5 0.03268 1.39203   2
  -8  -1   5 1.02451 1.14185   3
  -8   1   5 -2.0878  1.3615   2
   8   1  -5 0.88471 0.94370   1
  -8   1   5 0.67857 0.94298   3
  -7  -1   5 6.74888 1.60580   2
  -6  -1   5 -0.0040  0.8759   2
  -6  -1   5 0.62486 0.87866   3
   6  -1  -5 0.07555 0.74373   1
  -6   1   5 0.71658 0.82880   3
   6   1  -5 0.90510 0.78853   1
  -6   1   5 1.37144 1.14777   2
   5  -1  -5 5.51531 1.26110   1
  -5  -1   5 8.02983 1.21241   3
  -5  -1   5 8.04573 1.35249   2
  -5   1   5 5.49937 1.08887   1
   5   1  -5 5.66791 1.21540   1
  -5   1   5 7.06324 1.16952   3
  -4  -1   5 57.7993  3.2174   3
   4  -1  -5 63.5482  3.6532   1
  -4  -1   5 58.2133  3.7943   2
  -4   1   5 56.3691  3.2040   3
  -4   1   5 57.2425  3.8158   2
  -4   1   5 61.7550  3.5638   1
  -3  -1   5 667.747  34.876   2
  -3  -1   5 692.747  31.402   3
  -3  -1   5 730.134  33.117   1
  -3   1   5 686.194  33.058   1
  -3   1   5 672.755  34.880   2
   3   1  -5 782.755  33.259   1
  -3   1   5 694.807  31.304   3
  -2  -1   5 3.38089 0.92065   2
  -2  -1   5 5.30088 0.65996   3
  -2  -1   5 6.13115 1.11300   1
  -2   1   5 5.53797 1.01761   2
  -2   1   5 3.85755 1.00861   1
   2   1  -5 4.79374 1.17339   1
  -1  -1   5 196.003  11.463   2
  -1  -1   5 209.068  10.979   1
  -1   1   5 233.309  11.437   2
  -1   1   5 245.945  11.151   1
   0  -1   5 104.416   6.091   1
   0  -1   5 113.360   6.436   2
   0   1   5 103.017   6.124   1
   0   1   5 136.755   6.422   2
   1  -1   5 1297.36   59.64   1
   1   1   5 1264.97   59.69   1
   3  -1   5 848.382  40.227   1
   3   1   5 866.136  40.356   1
  -4  -1  -5 -0.1168  0.7715   2
   4  -1   5 0.69010 0.67812   1
  -4   1  -5 1.01664 0.93315   2
   4   1   5 0.56212 0.73636   1
   5  -1   5 46.4744  3.2395   1
  -5  -1  -5 50.4017  3.6172   2
  -5   1  -5 41.1769  3.6452   2
   5   1   5 56.7051  3.5448   1
  -6  -1  -5 1.85002 1.19706   2
   6   1   5 5.56916 1.32700   1
  -6   1  -5 2.92324 1.39885   2
  -7  -1  -5 2.62105 1.32951   2
  -7   1  -5 3.85460 1.56115   2
  -8  -1  -5 16.9923  2.5442   2
  -8  -1  -5 16.7536  3.3559   3
  -8   1  -5 13.8746  2.5047   2
  -9  -1  -5 21.4502  4.4950   3
  -9  -1  -5 31.8167  3.5811   2
  -9   1  -5 27.9952  3.5835   2
 -10  -1  -5 -3.6875  2.4155   3
 -10   1  -5 2.46626 2.47884   3
 -10   1  -5 -1.9403  1.8893   2
 -11  -1  -5 46.0330  5.8814   3
 -11   1  -5 52.2578  6.0832   3
 -12  -1  -5 1.88378 3.12120   3
 -12   1  -5 0.03924 2.45538   3
 -13  -1  -5 28.8809  5.2844   3
 -13   1  -5 36.6115  5.6878   3
 -14  -1  -5 -2.5869  3.0257   3
 -14   1  -5 0.10684 3.19134   3
 -15  -2   5 6.33369 2.99513   3
 -15   2   5 2.28639 3.03692   3
 -15   2   5 2.44908 3.01712   2
 -14  -2   5 4.12032 2.91314   3
 -14   2   5 -0.8720  2.3133   3
 -14   2   5 -1.6277  2.7362   2
 -13  -2   5 2.36088 2.65416   3
 -13   2   5 -0.3216  2.2655   2
 -13   2   5 -0.9763  2.3445   3
 -12  -2   5 -3.9640  2.1071   2
 -12  -2   5 -3.1688  2.0316   3
 -12   2   5 -5.6467  2.4289   2
 -12   2   5 1.10154 2.14217   3
 -11  -2   5 30.4504  4.2577   3
 -11  -2   5 40.4037  4.4695   2
 -11   2   5 38.2362  4.5928   2
 -11   2   5 39.1621  4.6042   3
 -10  -2   5 -0.6826  1.7139   3
 -10  -2   5 -0.1834  1.6927   2
 -10   2   5 -0.8631  1.9729   2
 -10   2   5 0.22751 1.76127   3
  -9  -2   5 227.859  13.006   2
  -9  -2   5 239.959  12.276   3
  -9   2   5 236.195  13.252   2
  -8  -2   5 -0.3529  1.2096   3
  -8  -2   5 -1.8951  1.0763   2
  -8   2   5 -0.1953  1.1034   3
  -8   2   5 -2.4053  1.3414   2
   8   2  -5 -1.4026  0.8947   1
   7  -2  -5 385.435  18.897   1
  -7  -2   5 398.047  20.536   2
  -7   2   5 405.583  18.862   3
  -7   2   5 404.349  20.750   2
   7   2  -5 389.526  19.084   1
   6  -2  -5 104.010   5.496   1
  -6  -2   5 101.143   6.072   2
  -6   2   5 98.4252  5.3355   1
   6   2  -5 105.203   5.601   1
  -6   2   5 91.8030  6.1518   2
  -6   2   5 104.378   5.564   3
  -5  -2   5 332.611  17.338   2
  -5  -2   5 332.051  15.684   3
   5  -2  -5 339.290  16.290   1
  -5   2   5 339.807  17.480   2
  -5   2   5 341.590  15.674   3
   5   2  -5 336.505  16.336   1
  -5   2   5 332.737  16.197   1
  -4  -2   5 522.208  24.203   3
  -4  -2   5 512.889  26.800   2
  -4   2   5 545.083  24.156   3
  -4   2   5 548.546  25.357   1
  -4   2   5 544.895  26.932   2
  -3  -2   5 1375.61   59.64   3
  -3  -2   5 1285.10   65.83   2
   3   2  -5 1409.24   62.42   1
  -3   2   5 1364.07   65.87   2
  -3   2   5 1272.84   62.28   1
  -2  -2   5 326.255  16.290   1
  -2  -2   5 334.431  15.268   3
  -2  -2   5 302.530  17.109   2
   2   2  -5 339.072  16.394   1
  -2   2   5 342.610  16.374   1
  -2   2   5 375.423  17.146   2
  -1  -2   5 90.1196  5.3911   1
  -1  -2   5 88.0700  5.6440   2
  -1   2   5 114.146   5.627   1
   1   2  -5 91.7504  5.4513   1
  -1   2   5 112.588   5.591   2
   0  -2   5 317.783  16.711   2
   0  -2   5 328.850  15.816   1
   0   2  -5 349.208  15.906   1
   0   2   5 304.014  15.824   1
   1  -2   5 153.278   8.402   1
   1   2   5 172.549   8.743   2
   1   2   5 167.639   8.585   1
   2  -2   5 142.035   7.347   1
   2   2   5 138.533   7.476   1
   3  -2   5 285.187  14.084   1
   3   2   5 289.353  14.312   1
   4  -2   5 23.5970  2.0925   1
  -4  -2  -5 31.1294  2.3750   2
   4   2   5 25.7970  2.3426   1
  -4   2  -5 25.2216  2.5610   2
   5  -2   5 651.670  31.591   1
  -5  -2  -5 677.017  33.546   2
  -5  -2  -5 691.209  31.527   3
  -5   2  -5 657.256  33.934   2
   5   2   5 678.977  32.020   1
  -6  -2  -5 27.3337  3.4419   3
  -6  -2  -5 26.6615  2.6001   2
  -6   2  -5 31.0658  3.3126   2
   6   2   5 31.6776  2.6780   1
  -7  -2  -5 287.208  15.179   3
  -7  -2  -5 283.273  15.198   2
  -7   2  -5 292.693  15.705   2
  -8  -2  -5 37.5063  4.5545   3
  -8  -2  -5 31.7658  3.3151   2
  -8   2  -5 31.0560  3.6940   2
  -9  -2  -5 232.008  14.011   3
  -9   2  -5 258.333  14.180   2
 -10  -2  -5 1.16098 2.63577   3
 -10   2  -5 -2.1447  1.8321   2
 -11  -2  -5 10.6315  3.5053   3
 -11   2  -5 13.8067  3.3607   3
 -11   2  -5 6.70198 2.92893   2
 -12  -2  -5 8.16292 3.45192   3
 -12   2  -5 1.66679 2.75639   3
 -13  -2  -5 -0.4589  2.9911   3
 -13   2  -5 -3.4689  2.8269   3
 -14  -2  -5 3.43215 3.41663   3
 -14   2  -5 -0.1697  3.1827   3
 -15  -3   5 28.6882  4.6608   3
 -15   3   5 29.4777  4.8044   2
 -14  -3   5 5.47356 2.86449   3
 -14   3   5 6.44543 2.96152   2
 -14   3   5 3.35601 2.88967   3
 -13  -3   5 27.7675  4.2638   3
 -13   3   5 26.0746  4.1285   2
 -13   3   5 29.3458  4.3618   3
 -12  -3   5 12.4882  3.1546   3
 -12  -3   5 9.93903 2.78034   2
 -12   3   5 14.6923  3.1309   3
 -12   3   5 10.3616  3.2068   2
 -11  -3   5 83.6043  6.1399   3
 -11  -3   5 79.9744  6.1472   2
 -11   3   5 92.7973  6.4021   3
 -11   3   5 78.0594  6.3973   2
 -10  -3   5 19.0089  2.8623   2
 -10  -3   5 22.0741  3.1029   3
 -10   3   5 7.68518 2.16938   3
 -10   3   5 16.1398  3.0541   2
  -9  -3   5 61.6652  4.7194   3
  -9  -3   5 59.7994  4.7269   2
  -9   3   5 62.9984  5.0932   2
  -8  -3   5 -0.0803  1.0496   3
  -8  -3   5 -2.3356  1.0578   2
  -8   3   5 -1.4371  1.2487   3
  -8   3   5 -1.3695  1.3854   2
   8   3  -5 -0.7324  0.9938   1
   7  -3  -5 43.5415  2.9497   1
  -7  -3   5 39.0444  3.2008   3
  -7  -3   5 44.3191  3.5503   2
  -7   3   5 56.6410  4.0922   2
   7   3  -5 47.8086  3.1950   1
  -6  -3   5 8.15457 1.54121   2
   6  -3  -5 10.6407  1.3691   1
  -6  -3   5 4.54768 1.14391   3
   6   3  -5 8.28200 1.41839   1
  -5  -3   5 76.5695  4.8127   2
  -5   3   5 78.1968  4.4386   1
  -5   3   5 82.1040  5.0817   2
  -4  -3   5 27.1517  2.2718   2
  -4  -3   5 22.6832  1.8159   3
   4   3  -5 25.8442  2.2152   1
  -4   3   5 31.6676  2.4429   2
  -4   3   5 27.6102  2.0928   1
  -3  -3   5 547.643  28.332   2
  -3  -3   5 576.030  25.550   3
  -3   3   5 560.596  26.871   1
  -3   3   5 575.357  28.354   2
   3   3  -5 572.698  26.913   1
  -2  -3   5 229.669  10.241   3
  -2  -3   5 210.908  11.574   2
  -2   3   5 216.290  11.016   1
   2   3  -5 222.274  11.052   1
  -1  -3   5 595.845  28.764   1
  -1  -3   5 620.416  30.501   2
  -1  -3   5 604.746  27.430   3
   1   3  -5 613.705  28.845   1
   0  -3  -5 527.713  23.700   3
   0  -3   5 544.788  25.097   1
   0   3   5 508.642  26.156   2
   0   3   5 511.771  25.168   1
   0   3  -5 543.320  25.137   1
  -1  -3  -5 931.061  42.092   3
  -1   3  -5 959.207  43.923   1
   1   3   5 926.963  46.112   2
   1   3   5 936.137  44.073   1
   2  -3   5 321.202  15.346   1
  -2  -3  -5 311.471  14.898   3
   2   3   5 311.772  15.571   1
  -2   3  -5 317.267  15.348   1
  -3  -3  -5 465.682  21.711   3
   3  -3   5 464.676  22.048   1
  -3   3  -5 456.940  22.047   1
  -4  -3  -5 80.1831  4.8126   2
   4  -3   5 82.0004  4.6112   1
  -4  -3  -5 87.1866  5.2572   3
  -4   3  -5 84.9891  4.6455   1
   4   3   5 78.8489  4.9656   1
  -4   3  -5 81.8505  5.3738   2
   5  -3   5 76.0156  4.4778   1
  -5  -3  -5 97.6850  5.7211   3
  -5  -3  -5 82.7110  4.8947   2
  -5   3  -5 76.6683  5.4515   2
   5   3   5 87.5005  5.0981   1
  -5   3  -5 70.6364  4.4706   1
  -6  -3  -5 18.3144  2.9111   3
  -6  -3  -5 19.7937  2.1806   2
  -6   3  -5 11.9316  2.3166   2
   6   3   5 20.4035  2.3513   1
  -7  -3  -5 1.47213 1.17040   2
  -7  -3  -5 -0.9730  1.5747   3
  -7   3  -5 1.93003 1.48106   2
  -8  -3  -5 60.4705  5.3970   3
  -8   3  -5 59.1563  4.9838   2
  -9  -3  -5 67.6437  6.4620   3
  -9   3  -5 79.2738  6.0903   2
 -10  -3  -5 0.70276 2.38168   3
 -10   3  -5 0.24969 2.04633   2
 -11  -3  -5 48.8214  6.1583   3
 -11   3  -5 51.7219  5.2195   2
 -12  -3  -5 17.3675  4.1113   3
 -12   3  -5 13.3342  3.6380   3
 -13  -3  -5 35.1774  5.6694   3
 -13   3  -5 31.8426  5.5054   3
 -15  -4   5 3.16647 2.99477   3
 -15   4   5 3.32121 3.12928   2
 -14  -4   5 2.20482 2.86500   3
 -14   4   5 2.04521 2.64460   3
 -14   4   5 6.13407 3.11893   2
 -13  -4   5 9.33274 2.89518   3
 -13   4   5 -0.5954  2.3543   3
 -13   4   5 3.46661 2.78717   2
 -12  -4   5 -1.2545  2.0061   3
 -12   4   5 1.11346 2.25763   3
 -12   4   5 -2.1615  2.2515   2
 -11  -4   5 30.7562  3.9195   3
 -11  -4   5 24.7528  3.5222   2
 -11   4   5 27.6758  4.0367   2
 -11   4   5 16.3808  3.2033   3
 -10  -4   5 14.4591  2.6654   2
 -10  -4   5 16.4936  2.7597   3
 -10   4   5 14.0894  3.1346   2
  -9  -4   5 271.477  15.073   2
  -9  -4   5 296.437  14.279   3
  -9   4   5 268.792  15.535   2
  -8  -4   5 37.6330  3.2832   3
  -8  -4   5 36.2977  3.2624   2
   8   4  -5 31.0837  2.8298   1
  -8   4   5 40.3341  3.8275   2
  -7  -4   5 198.196  10.730   2
  -7  -4   5 187.389   9.894   3
   7  -4  -5 189.753   9.707   1
   7   4  -5 200.778  10.091   1
  -7   4   5 196.799  11.121   2
  -7   4   5 194.244   9.631   1
  -6  -4   5 238.920  12.685   2
  -6  -4   5 240.858  11.652   3
  -6   4   5 239.452  13.022   2
  -6   4   5 230.299  11.665   1
   6   4  -5 241.014  11.980   1
  -5  -4   5 58.4603  3.7002   2
  -5  -4   5 47.1750  3.1939   3
   5   4  -5 43.6244  3.3210   1
  -5   4   5 62.0812  4.0223   2
  -5   4   5 57.5471  3.3447   1
  -4  -4   5 231.590  12.448   2
  -4   4   5 244.744  12.591   2
   4   4  -5 242.036  11.844   1
  -4   4   5 227.825  11.725   1
  -3  -4   5 323.707  17.003   2
   3   4  -5 330.396  16.158   1
  -3   4   5 354.020  17.050   2
  -3   4   5 317.168  16.099   1
  -2  -4   5 28.3951  2.4221   2
   2   4  -5 26.8422  2.1722   1
  -2   4   5 34.8692  2.3114   2
  -2   4   5 27.5904  2.2465   1
  -1  -4   5 113.518   6.785   2
   1  -4  -5 119.681   5.511   3
   1   4  -5 108.613   6.319   1
  -1   4   5 138.201   6.613   1
   0  -4  -5 2.80888 0.60092   3
   0   4   5 2.59892 0.92894   1
   0   4   5 1.65895 0.62004   2
   0   4  -5 1.50777 0.80479   1
  -1  -4  -5 13.2310  1.3957   3
  -1   4  -5 17.0138  1.7344   1
   1   4   5 14.5059  1.7561   1
   1   4   5 12.2407  1.2914   2
   2  -4   5 135.366   7.093   1
  -2  -4  -5 133.591   6.957   3
   2   4   5 132.204   7.411   1
  -2   4  -5 142.826   7.162   1
   3  -4   5 670.877  32.055   1
  -3  -4  -5 679.113  31.350   3
   3   4   5 691.183  32.545   1
  -3   4  -5 687.343  32.108   1
  -4  -4  -5 4.26940 1.37146   3
   4  -4   5 3.61993 0.88317   1
  -4  -4  -5 6.36559 1.03629   2
  -4   4  -5 4.02597 1.40026   2
  -4   4  -5 4.52265 0.99113   1
   4   4   5 6.11870 1.37709   1
   5  -4   5 442.475  21.577   1
  -5  -4  -5 452.970  22.874   2
  -5  -4  -5 492.698  22.125   3
  -5   4  -5 450.450  23.740   2
   5   4   5 456.648  22.331   1
  -5   4  -5 445.094  21.592   1
  -6  -4  -5 68.3367  4.8694   3
  -6  -4  -5 59.2916  3.9042   2
  -6   4  -5 55.2237  4.5885   2
   6   4   5 64.4141  4.3200   1
  -7  -4  -5 56.4698  4.8364   3
   7   4   5 51.1873  3.9487   1
  -7   4  -5 52.2066  4.4095   2
  -8  -4  -5 67.5424  5.7689   3
  -8   4  -5 67.7141  5.5399   2
  -9  -4  -5 169.450  10.880   3
  -9   4  -5 176.226  10.828   2
 -10  -4  -5 27.8793  4.6483   3
 -10   4  -5 26.7356  3.8369   2
 -11  -4  -5 7.17638 3.02962   3
 -11   4  -5 7.38897 2.91138   2
 -12  -4  -5 13.7955  3.8854   3
 -12   4  -5 10.0696  3.3723   2
 -13  -4  -5 4.04363 3.13518   3
 -13   4  -5 2.40543 2.87131   3
 -15  -5   5 26.4024  4.5409   3
 -15   5   5 19.1951  4.1733   2
 -14  -5   5 11.9121  3.3129   3
 -14   5   5 6.49918 3.27418   2
 -13  -5   5 7.34314 2.95001   3
 -13   5   5 4.35248 2.96651   2
 -13   5   5 15.1712  3.2408   3
 -12  -5   5 39.0647  4.5882   3
 -12   5   5 38.5730  4.9275   2
 -12   5   5 38.4323  4.5910   3
 -11  -5   5 63.2300  5.1546   3
 -11   5   5 60.6032  5.6093   2
 -10  -5   5 33.8752  3.7402   3
 -10  -5   5 30.7970  3.6309   2
 -10   5   5 31.9847  4.3531   2
  -9  -5   5 20.6767  2.7965   2
  -9  -5   5 19.6046  2.7726   3
   9   5  -5 20.6867  2.5866   1
  -9   5   5 24.2287  3.5995   2
  -8  -5   5 7.20079 1.82605   3
  -8  -5   5 8.67888 1.83160   2
  -8   5   5 8.87688 2.33698   2
   8   5  -5 5.12906 1.60880   1
  -7  -5   5 9.12916 1.68585   2
  -7  -5   5 10.6328  1.8239   3
   7   5  -5 7.83425 1.60414   1
  -7   5   5 7.48155 1.99772   2
  -6  -5   5 -0.5632  0.7831   2
  -6  -5   5 -0.0436  0.8789   3
   6   5  -5 -0.3205  0.4421   1
  -6   5   5 -2.6402  1.0305   2
  -6   5   5 0.29746 0.69383   1
  -5  -5   5 0.72511 0.83236   2
  -5  -5   5 2.88584 0.87844   3
  -5   5   5 1.62219 0.81013   1
  -5   5   5 -2.2912  0.9316   2
   5   5  -5 0.33825 0.90633   1
  -4  -5   5 371.648  17.273   3
  -4  -5   5 369.984  19.081   2
   4   5  -5 380.665  18.146   1
  -4   5   5 364.221  18.012   1
  -4   5   5 375.698  19.228   2
  -3  -5   5 801.629  36.513   3
  -3  -5   5 797.902  40.344   2
  -3   5   5 778.480  38.135   1
  -3   5   5 893.182  40.386   2
   3   5  -5 786.200  38.153   1
  -2  -5   5 254.829  11.992   3
  -2  -5   5 252.934  13.481   2
   2   5  -5 262.055  12.743   1
  -2   5   5 267.355  13.255   2
  -2   5   5 241.891  12.726   1
   1  -5  -5 269.652  12.567   3
  -1  -5   5 266.140  14.587   2
  -1  -5   5 297.932  13.141   3
   1   5  -5 275.024  13.712   1
  -1   5   5 270.251  14.148   2
  -1   5   5 294.236  13.880   1
   0  -5  -5 647.445  27.066   3
   0   5  -5 595.427  28.512   1
   0   5   5 596.333  28.727   1
   0   5   5 568.176  29.699   2
  -1  -5  -5 449.403  19.880   3
  -1   5  -5 450.562  20.843   1
   1   5   5 409.833  21.036   1
   1   5   5 426.327  21.568   2
  -2  -5  -5 171.239   8.601   3
  -2   5  -5 177.592   8.855   1
   2   5   5 172.406   9.227   1
  -3  -5  -5 151.101   8.156   3
  -3   5  -5 165.552   8.093   1
  -3   5  -5 162.705   9.208   2
   3   5   5 150.169   8.514   1
  -4  -5  -5 22.3829  2.5716   3
  -4  -5  -5 27.1366  1.9102   2
  -4   5  -5 22.9524  1.9046   1
  -4   5  -5 24.0819  2.8613   2
  -5  -5  -5 70.4014  4.0497   2
  -5  -5  -5 68.3335  4.8193   3
  -5   5  -5 67.7685  3.8564   1
   5   5   5 64.2163  4.5472   1
  -5   5  -5 65.7336  5.0018   2
  -6  -5  -5 -0.5199  1.3531   3
  -6  -5  -5 2.25274 1.05700   2
  -6   5  -5 2.92141 1.66841   2
   6   5   5 0.96415 1.15099   1
  -7  -5  -5 9.63081 2.35264   3
  -7   5  -5 7.24754 2.16108   2
   7   5   5 9.74894 1.99801   1
  -8  -5  -5 106.160   7.419   3
  -8   5  -5 97.3585  7.1895   2
  -9  -5  -5 34.3541  4.8252   3
  -9   5  -5 31.8904  4.1663   2
 -10  -5  -5 16.9602  3.9936   3
 -10   5  -5 19.5416  3.6920   2
 -11  -5  -5 28.8824  4.6136   3
 -11   5  -5 25.2740  4.1446   2
 -12  -5  -5 21.9851  4.5298   3
 -12   5  -5 21.9105  4.2290   2
 -13  -5  -5 25.8341  5.0300   3
 -15  -6   5 0.95491 2.90883   3
 -15   6   5 4.46996 3.05218   2
 -14  -6   5 1.18884 2.80132   3
 -14   6   5 -1.3816  2.7845   2
 -13  -6   5 -3.3789  2.0651   3
 -13   6   5 2.14447 2.53372   3
 -13   6   5 0.05507 2.36840   2
 -12  -6   5 3.09513 2.22969   3
 -12   6   5 2.64592 2.53984   2
 -12   6   5 1.72885 2.09405   3
 -11  -6   5 10.7217  2.7369   3
 -11   6   5 18.3749  3.6143   2
 -10  -6   5 57.5834  4.4971   2
 -10  -6   5 48.6222  4.3476   3
 -10   6   5 53.3886  5.1260   2
  -9  -6   5 124.513   7.100   3
  -9  -6   5 117.863   7.200   2
   9   6  -5 110.185   6.749   1
  -9   6   5 105.810   7.694   2
  -8  -6   5 94.8078  5.8381   2
  -8  -6   5 90.9571  5.6286   3
   8   6  -5 87.6444  5.5911   1
  -8   6   5 87.1513  6.3896   2
  -7  -6   5 293.592  14.630   2
  -7  -6   5 297.875  13.637   3
  -7   6   5 269.902  15.057   2
  -7   6   5 272.500  13.337   1
   7   6  -5 238.358  13.706   1
  -6  -6   5 269.478  13.898   2
  -6  -6   5 262.122  12.774   3
  -6   6   5 261.818  12.868   1
   6   6  -5 254.022  13.202   1
  -6   6   5 257.374  14.258   2
  -5  -6   5 8.43806 1.48366   2
  -5  -6   5 11.5457  1.5829   3
   5   6  -5 11.8744  1.7883   1
  -5   6   5 10.7782  1.5288   1
  -5   6   5 7.37780 1.94158   2
  -4  -6   5 238.748  11.277   3
  -4  -6   5 233.612  12.431   2
   4   6  -5 244.961  11.903   1
  -4   6   5 237.751  12.597   2
  -4   6   5 215.993  11.678   1
  -3  -6   5 48.4125  3.5325   2
  -3  -6   5 51.3518  3.1235   3
  -3   6   5 59.4767  3.6743   2
   3   6  -5 50.8980  3.4565   1
  -3   6   5 49.6950  3.4429   1
  -2  -6   5 277.875  12.452   3
  -2  -6   5 281.440  13.956   2
   2   6  -5 276.861  13.118   1
  -2   6   5 218.319  13.461   2
  -2   6   5 264.501  13.156   1
  -1  -6   5 159.661   7.860   3
   1  -6  -5 156.912   7.319   3
   1   6  -5 153.122   8.166   1
  -1   6   5 155.783   8.326   2
  -1   6   5 159.913   8.352   1
   0  -6  -5 7.33083 0.89487   3
   0   6   5 7.98344 1.00315   2
   0   6   5 4.86673 1.23098   1
   0   6  -5 6.83320 1.19694   1
  -1  -6  -5 0.44406 0.61790   3
   1   6   5 0.31989 0.43873   2
  -1   6  -5 -0.3569  0.6137   1
   1   6   5 -0.6470  0.7296   1
  -2  -6  -5 114.865   6.053   3
  -2   6  -5 116.655   6.206   1
   2   6   5 114.726   6.639   1
  -3  -6  -5 84.6621  4.8521   3
   3   6   5 78.1018  5.1622   1
  -3   6  -5 85.1138  5.5769   2
  -3   6  -5 82.8459  4.6219   1
  -4  -6  -5 372.367  18.503   2
  -4  -6  -5 375.607  17.924   3
   4   6   5 362.637  18.584   1
  -4   6  -5 373.681  19.804   2
  -4   6  -5 375.169  17.815   1
  -5  -6  -5 121.840   7.168   3
  -5  -6  -5 123.960   6.552   2
  -5   6  -5 122.071   6.320   1
  -5   6  -5 122.831   7.818   2
  -6  -6  -5 52.8129  4.3358   3
  -6   6  -5 49.8071  4.3778   2
   6   6   5 49.9064  4.0279   1
  -7  -6  -5 13.2784  2.7015   3
   7   6   5 14.9822  2.4185   1
  -7   6  -5 14.5699  2.7371   2
  -8  -6  -5 97.4603  7.3558   3
  -8   6  -5 100.663   7.347   2
  -9  -6  -5 73.7770  6.5753   3
  -9   6  -5 78.1148  6.2834   2
 -10  -6  -5 95.2191  7.5578   3
 -10   6  -5 91.4206  7.3754   2
 -11  -6  -5 0.58459 2.61727   3
 -11   6  -5 5.35445 2.75738   2
 -12  -6  -5 9.03313 3.51772   3
 -12   6  -5 5.93856 3.17095   2
 -13  -6  -5 -2.2099  3.0481   3
 -13   6  -5 -0.2408  2.9547   2
 -15  -7   5 15.1439  3.8305   3
 -15   7   5 13.0392  3.8474   2
 -14  -7   5 6.74119 3.10084   3
 -14   7   5 5.41537 3.18905   2
 -13  -7   5 8.13911 2.73728   3
 -13   7   5 3.16874 2.78616   2
 -12  -7   5 39.7668  4.5081   3
 -12   7   5 39.8021  5.1899   2
 -11  -7   5 12.3154  2.6809   3
 -11   7   5 10.0160  2.9899   2
 -10  -7   5 31.7740  3.6870   3
 -10   7   5 28.2260  4.1036   2
  -9  -7   5 7.03327 1.98272   3
  -9  -7   5 10.4240  2.1126   2
   9   7  -5 11.8991  2.2783   1
  -9   7   5 5.59240 2.45396   2
  -8  -7   5 17.2024  2.2956   2
  -8  -7   5 12.9502  2.2495   3
  -8   7   5 11.9717  2.5860   2
   8   7  -5 16.3661  2.4215   1
  -7  -7   5 0.59082 1.26147   3
  -7  -7   5 0.61004 1.05143   2
  -7   7   5 1.67096 0.85866   1
  -7   7   5 0.56600 1.66653   2
   7   7  -5 0.76285 0.94102   1
  -6  -7   5 2.20190 1.14472   2
  -6  -7   5 3.41982 1.24499   3
  -6   7   5 3.79500 1.10874   1
   6   7  -5 1.55786 1.24894   1
  -6   7   5 0.60672 1.58774   2
  -5  -7   5 35.4563  2.6555   3
  -5  -7   5 28.0212  2.5741   2
   5   7  -5 30.8851  2.6831   1
  -5   7   5 30.0087  3.2967   2
  -5   7   5 31.7336  2.4987   1
  -4  -7   5 493.701  25.078   2
  -4  -7   5 497.441  22.810   3
   4   7  -5 482.920  23.769   1
  -4   7   5 492.682  23.720   1
  -4   7   5 501.118  25.226   2
  -3  -7   5 527.902  25.895   2
  -3  -7   5 508.760  23.374   3
  -3   7   5 475.613  24.388   1
   3   7  -5 502.123  24.449   1
  -3   7   5 530.207  25.832   2
  -2  -7   5 291.516  15.392   2
   2  -7  -5 298.212  13.447   3
  -2  -7   5 290.969  13.820   3
   2   7  -5 285.336  14.461   1
  -2   7   5 293.763  14.599   1
   1  -7  -5 945.351  42.184   3
  -1  -7   5 980.438  42.758   3
  -1   7   5 905.154  46.533   2
  -1   7   5 952.171  44.597   1
   1   7  -5 946.168  44.376   1
   0  -7  -5 1082.61   46.20   3
   0   7  -5 1002.47   48.34   1
   0   7   5 1026.97   50.67   2
   0   7   5 1020.36   48.67   1
  -1  -7  -5 5.64021 1.04219   3
  -1   7  -5 6.59368 1.25875   1
   1   7   5 4.54177 1.47721   1
   1   7   5 4.56454 0.80385   2
  -2  -7  -5 302.443  13.886   3
   2   7   5 274.564  14.744   1
  -2   7  -5 296.082  14.279   1
  -3  -7  -5 2.33244 0.99546   3
  -3   7  -5 2.60253 0.92817   1
   3   7   5 2.83457 1.19774   1
  -3   7  -5 2.07475 1.26651   2
  -4  -7  -5 152.528   8.077   3
  -4  -7  -5 145.611   7.561   2
   4   7   5 150.450   8.467   1
  -4   7  -5 154.706   9.127   2
  -4   7  -5 146.047   7.611   1
  -5  -7  -5 2.67034 1.35925   3
  -5   7  -5 2.00989 0.82262   1
  -5   7  -5 0.33978 1.34363   2
   5   7   5 0.77020 1.15094   1
  -6  -7  -5 3.33633 1.66502   3
  -6   7  -5 0.56372 1.56695   2
   6   7   5 0.66416 1.25805   1
  -7  -7  -5 17.1888  2.8473   3
   7   7   5 16.3107  2.7437   1
  -7   7  -5 16.5302  3.0596   2
  -8  -7  -5 50.9201  5.4571   3
  -8   7  -5 58.5444  5.4720   2
  -9  -7  -5 -2.4672  2.1842   3
  -9   7  -5 -0.3859  2.1358   2
 -10  -7  -5 51.4341  5.8531   3
 -10   7  -5 44.1348  5.4418   2
 -11  -7  -5 16.4049  3.8726   3
 -11   7  -5 4.56667 2.91772   2
 -12  -7  -5 20.5177  4.5682   3
 -12   7  -5 28.5921  4.8773   2
 -13  -7  -5 6.84274 3.58676   3
 -13   7  -5 12.0233  3.9972   2
 -15  -8   5 -0.0634  2.7022   3
 -15   8   5 -2.0768  3.0512   2
 -14  -8   5 0.69945 2.54818   3
 -14   8   5 1.91898 3.02911   2
 -13  -8   5 -2.3698  2.2437   3
 -13   8   5 -1.4790  2.6258   2
 -12  -8   5 7.95132 2.68769   3
 -12   8   5 9.85579 3.19757   2
 -11  -8   5 0.10141 1.86431   3
 -11   8   5 -4.2379  1.9202   2
 -10  -8   5 65.5570  5.1090   3
 -10   8   5 70.1782  5.9346   2
  -9  -8   5 29.4369  3.3480   3
  -9   8   5 21.7899  3.6194   2
   9   8  -5 30.7444  3.3377   1
  -8  -8   5 172.760   9.363   3
  -8  -8   5 171.268   9.732   2
  -8   8   5 168.100  10.434   2
  -7  -8   5 29.9205  2.7129   2
  -7  -8   5 30.0136  3.0312   3
   7   8  -5 25.7427  2.9885   1
  -7   8   5 23.0696  3.2627   2
  -6  -8   5 525.044  26.386   2
  -6  -8   5 489.002  24.195   3
  -6   8   5 532.584  26.910   2
   6   8  -5 530.386  25.210   1
  -6   8   5 514.917  24.796   1
  -5  -8   5 22.1864  2.3718   3
  -5  -8   5 19.3777  2.3798   2
   5   8  -5 26.7608  2.4965   1
  -5   8   5 26.9267  3.0511   2
  -5   8   5 20.9737  2.2247   1
  -4  -8   5 170.325   9.280   2
  -4  -8   5 157.969   8.391   3
  -4   8   5 161.203   8.734   1
  -4   8   5 167.267   9.400   2
   4   8  -5 170.916   8.925   1
  -3  -8   5 122.124   6.791   3
  -3  -8   5 134.341   7.650   2
  -3   8   5 136.644   7.331   1
   3   8  -5 131.311   7.208   1
  -3   8   5 134.636   7.584   2
   2  -8  -5 494.190  21.983   3
  -2  -8   5 483.870  22.374   3
   2   8  -5 484.110  23.323   1
  -2   8   5 469.915  23.422   1
   1  -8  -5 5.53617 0.90421   3
  -1  -8   5 6.28052 1.29628   3
  -1   8   5 7.41506 1.22943   2
  -1   8   5 4.32011 1.35702   1
   1   8  -5 3.71495 1.24910   1
   0  -8  -5 66.2083  3.6533   3
   0   8   5 65.7093  4.4435   1
   0   8   5 66.4144  3.8879   2
   0   8  -5 68.6466  4.1740   1
  -1  -8  -5 15.9778  1.6746   3
   1   8   5 14.7962  1.3129   2
   1   8   5 13.4679  2.0708   1
  -1   8  -5 18.2881  1.9764   1
  -2  -8  -5 361.044  16.500   3
   2   8   5 356.522  17.627   1
   2   8   5 335.802  17.311   2
  -2   8  -5 351.524  17.009   1
  -3  -8  -5 10.6726  1.7251   3
   3   8   5 16.0516  2.2516   1
  -3   8  -5 16.0931  2.4901   2
  -3   8  -5 12.6395  1.6284   1
  -4  -8  -5 289.814  14.437   3
   4   8   5 294.735  15.219   1
  -4   8  -5 295.109  14.291   1
  -4   8  -5 295.685  16.220   2
  -5  -8  -5 62.8829  4.4117   3
  -5   8  -5 57.8976  4.9530   2
  -5   8  -5 60.7061  3.6513   1
   5   8   5 66.1552  4.6763   1
  -6  -8  -5 191.218  10.316   3
  -6   8  -5 182.041  11.250   2
  -7  -8  -5 40.8598  4.3096   3
   7   8   5 41.2517  4.3005   1
  -7   8  -5 31.3302  4.1696   2
  -8  -8  -5 129.910   8.439   3
  -8   8  -5 126.902   8.805   2
  -9  -8  -5 17.3025  3.5497   3
  -9   8  -5 10.0809  3.1703   2
 -10  -8  -5 50.4489  5.7894   3
 -10   8  -5 48.2532  5.6495   2
 -11  -8  -5 0.64548 2.54934   3
 -11   8  -5 0.46603 2.81871   2
 -12  -8  -5 4.33329 3.27915   3
 -12   8  -5 4.63441 3.32600   2
 -13  -8  -5 0.68222 3.08351   3
 -13   8  -5 -2.2018  3.1179   2
 -15  -9   5 -1.7420  2.5758   3
 -15   9   5 -2.0852  3.0219   2
 -14  -9   5 19.7748  3.9046   3
 -14   9   5 14.9854  4.0077   2
 -13  -9   5 0.12306 2.30214   3
 -13   9   5 -1.9022  2.7496   2
 -12  -9   5 57.2573  5.6845   3
 -12   9   5 55.0182  6.2142   2
 -11  -9   5 2.35787 2.07522   3
 -11   9   5 -2.8134  2.1670   2
 -10  -9   5 43.0971  4.4314   3
 -10   9   5 43.5987  5.1119   2
  -9  -9   5 4.09175 1.90004   3
  -9   9   5 1.19886 2.17706   2
   9   9  -5 4.69798 1.95925   1
  -8  -9   5 16.2664  2.2892   2
  -8  -9   5 12.7009  2.3058   3
   8   9  -5 13.3611  2.5016   1
  -8   9   5 13.7089  2.7264   2
  -7  -9   5 -0.7382  1.2376   3
  -7  -9   5 0.18362 0.98889   2
   7   9  -5 -0.0939  1.3499   1
  -7   9   5 -3.1089  1.3025   2
  -6  -9   5 -0.9869  0.9409   2
  -6  -9   5 1.17102 1.23286   3
   6   9  -5 0.29110 1.23994   1
  -6   9   5 -0.0250  1.3580   2
  -6   9   5 0.72642 0.90562   1
  -5  -9   5 19.5496  2.3183   3
  -5  -9   5 18.9791  2.2770   2
  -5   9   5 15.1886  2.5256   2
  -5   9   5 17.8779  2.1162   1
   5   9  -5 13.9834  2.1486   1
  -4  -9   5 188.098   9.913   3
  -4  -9   5 198.994  10.898   2
  -4   9   5 208.050  11.112   2
  -4   9   5 191.576  10.332   1
   4   9  -5 204.760  10.520   1
  -3  -9   5 134.319   7.582   2
  -3  -9   5 120.332   6.723   3
  -3   9   5 122.195   7.136   1
  -3   9   5 136.322   7.530   2
   3   9  -5 125.640   7.173   1
  -2  -9   5 162.950   8.385   3
   2  -9  -5 169.877   8.012   3
  -2   9   5 164.106   8.934   1
  -2   9   5 164.077   9.028   2
   2   9  -5 157.404   8.739   1
   1  -9  -5 186.480   9.122   3
  -1  -9   5 200.574   9.730   3
   1   9  -5 192.318   9.976   1
  -1   9   5 184.993  10.134   2
  -1   9   5 196.734  10.259   1
   0  -9  -5 294.108  13.525   3
   0   9   5 287.647  14.763   1
   0   9  -5 293.903  14.403   1
   0   9   5 282.298  14.692   2
  -1  -9  -5 92.1463  4.8830   3
   1   9   5 87.3211  5.5615   1
  -1   9  -5 86.2584  5.1299   1
   1   9   5 88.7714  4.7939   2
  -2  -9  -5 248.934  11.739   3
  -2   9  -5 250.651  12.107   1
   2   9   5 249.759  12.769   1
  -2   9  -5 213.747  13.306   2
  -3  -9  -5 29.3742  2.5684   3
  -3   9  -5 27.9814  3.3697   2
  -3   9  -5 26.0177  2.2381   1
   3   9   5 25.4747  3.0539   1
  -4  -9  -5 121.919   6.946   3
  -4   9  -5 120.475   8.016   2
   4   9   5 131.617   7.697   1
  -4   9  -5 124.964   6.633   1
  -5  -9  -5 -0.3542  1.1206   3
  -5   9  -5 -2.2029  1.4272   2
   5   9   5 -0.5155  1.1991   1
  -6  -9  -5 27.3237  3.3147   3
  -6   9  -5 26.1011  3.7807   2
   6   9   5 28.5692  3.4992   1
  -7  -9  -5 0.03811 1.70359   3
   7   9   5 2.48834 1.80245   1
  -7   9  -5 -1.4024  1.8187   2
  -8  -9  -5 16.2393  3.1025   3
  -8   9  -5 9.10838 2.99423   2
   8   9   5 15.3662  2.9428   1
  -9  -9  -5 0.56626 2.12002   3
  -9   9  -5 1.85503 2.43462   2
 -10  -9  -5 35.8615  4.9352   3
 -10   9  -5 42.2963  5.4468   2
 -11  -9  -5 -1.7405  2.3712   3
 -11   9  -5 5.46515 3.17514   2
 -12  -9  -5 21.8252  4.4393   3
 -12   9  -5 23.5803  4.6149   2
 -13  -9  -5 2.03044 3.17104   3
 -13   9  -5 4.77509 3.69675   2
 -14 -10   5 2.43627 2.92447   3
 -14  10   5 -1.4902  2.7953   2
 -13 -10   5 3.06799 2.74389   3
 -13  10   5 1.78346 3.10422   2
 -12 -10   5 16.5735  3.4086   3
 -12  10   5 17.6037  3.9097   2
 -11 -10   5 1.01809 2.09839   3
 -11  10   5 0.56719 2.53258   2
 -10 -10   5 71.8879  5.4745   3
  10  10  -5 67.2701  5.3609   1
 -10  10   5 63.3742  5.9784   2
  -9 -10   5 6.50598 1.95589   3
  -9  10   5 -0.3444  2.1888   2
   9  10  -5 -0.2006  1.0257   1
  -8 -10   5 195.166  10.377   3
   8  10  -5 198.917  10.740   1
  -8  10   5 175.609  11.386   2
  -7 -10   5 1.59226 1.40201   3
  -7 -10   5 3.43382 1.38522   2
   7  10  -5 1.43244 1.63704   1
  -7  10   5 1.51386 1.75246   2
  -6 -10   5 195.029  10.947   2
  -6 -10   5 189.864  10.271   3
  -6  10   5 197.870  11.510   2
  -6  10   5 202.760  10.394   1
   6  10  -5 209.817  10.844   1
  -5 -10   5 5.03452 1.45372   3
  -5 -10   5 3.30787 1.30079   2
  -5  10   5 5.39188 1.39663   1
  -5  10   5 5.92601 1.74794   2
   5  10  -5 2.70550 1.41645   1
  -4 -10   5 163.107   8.695   3
  -4 -10   5 176.314   9.512   2
   4  10  -5 163.452   9.131   1
  -4  10   5 169.384   9.070   1
  -4  10   5 164.014   9.590   2
  -3 -10   5 19.3955  2.1948   3
  -3  10   5 23.3621  2.6031   1
  -3  10   5 19.4473  2.4695   2
   3  10  -5 16.9677  2.3297   1
   2 -10  -5 130.002   6.589   3
  -2 -10   5 136.507   7.046   3
  -2  10   5 128.380   7.413   2
   2  10  -5 125.455   7.280   1
  -2  10   5 127.973   7.413   1
  -1 -10   5 14.6799  1.9704   3
   1 -10  -5 10.9526  1.3322   3
   1  10  -5 13.6763  1.9185   1
  -1  10   5 10.6012  1.8922   1
  -1  10   5 13.5020  1.7021   2
   0 -10  -5 17.2527  1.6206   3
   0  10   5 16.6556  1.6194   2
   0  10   5 17.5434  2.2896   1
   0  10  -5 20.5983  2.2414   1
  -1 -10  -5 23.2254  2.0427   3
   1  10   5 21.3277  2.6177   1
   1  10   5 22.0442  1.6376   2
  -1  10  -5 25.2744  2.2651   1
  -2 -10  -5 119.273   6.435   3
  -2  10  -5 121.212   6.607   1
   2  10   5 118.808   7.188   1
  -2  10  -5 119.545   7.656   2
  -3 -10  -5 0.07632 0.97484   3
  -3  10  -5 0.25541 0.93269   1
  -3  10  -5 -0.8573  1.3353   2
   3  10   5 -0.3692  1.3583   1
  -4 -10  -5 237.744  11.814   3
  -4  10  -5 225.612  13.380   2
  -4  10  -5 235.523  11.641   1
   4  10   5 229.076  12.616   1
  -5 -10  -5 9.07641 1.92481   3
  -5  10  -5 4.61124 2.11883   2
   5  10   5 2.48205 1.83023   1
  -6 -10  -5 296.484  15.391   3
  -6  10  -5 308.347  17.267   2
   6  10   5 301.653  16.107   1
  -7 -10  -5 0.99117 1.98533   3
   7  10   5 1.08059 1.44372   1
  -7  10  -5 0.06735 2.09175   2
  -8 -10  -5 75.9563  6.0682   3
   8  10   5 84.0281  6.4225   1
  -8  10  -5 82.2749  6.7211   2
  -9 -10  -5 1.14934 2.30457   3
  -9  10  -5 -3.7471  2.1785   2
 -10 -10  -5 31.6740  4.5406   3
 -10  10  -5 25.7702  4.4929   2
 -11 -10  -5 -2.7344  2.1875   3
 -11  10  -5 -2.1385  2.7342   2
 -12 -10  -5 4.26921 3.08083   3
 -12  10  -5 -2.3921  3.1286   2
 -13 -10  -5 -2.0250  3.0469   3
 -13  10  -5 -7.3196  3.0937   2
 -14 -11   5 23.8218  4.1702   3
 -14  11   5 19.0908  4.5532   2
 -13 -11   5 -0.5462  2.3401   3
 -13  11   5 0.03083 2.72997   2
 -12 -11   5 62.4802  5.5909   3
 -12  11   5 66.7670  6.5044   2
 -11 -11   5 9.90436 2.88156   3
 -11  11   5 5.39958 3.08806   2
 -10 -11   5 13.5848  2.7634   3
  10  11  -5 10.1920  2.6157   1
 -10  11   5 16.2495  3.7283   2
  -9 -11   5 4.63420 1.99067   3
   9  11  -5 -1.7357  1.9579   1
  -9  11   5 -3.2794  2.0851   2
  -8 -11   5 43.9074  3.9754   3
  -8  11   5 46.1599  4.6529   2
   8  11  -5 49.2702  4.2288   1
  -7 -11   5 0.60421 1.39453   3
[truncated: 766,127 more chars]
